# Supplementary material for: An evolutionary recent IFN/IL-6/CEBP axis is linked to monocyte expansion and tuberculosis severity in humans
Source: eLife. 2019 Oct 22;8:e47013. doi: 10.7554/eLife.47013 (PMC6819084; doi:10.7554/eLife.47013)
Supplement: Figure 1—figure supplement 1—source data 1. [file elife-47013-fig1-figsupp1-data1.xlsx]

## Sheet: Sheet1
Fig. S1b
Mtb syto24 (%)			Mtb syto24 MFI
PBMC	Cord blood		PBMC	Cord blood
73.1	78.1		238	261
88.6	67.4		291	244
89.2	61.3		395	198
76.6			237
60			162
68.8			270
56.8			290
68.9			220
40.1			104
46.2			110
59.5			188
Fig. S1d
days	CD14+								CD34+
4h	14000	10000	10000	60000	6000	16000	12000	10000	14000	24000	4000	2000	8000	12000
1d	160000	38000	80000	60000	24000				10000	10000	7000	8000	6000	0
3d	260000	160000	200000	2200000	600000	240000	160000	600000	42000	48000	61000	10000	44000	6000
5d	3400000	2200000	3200000	1000000					320000	400000	130000	780000	760000	400000
7d	1000000	4000000	200000	400000	1000000	1400000			2800000	2000000	2600000	1700000	1300000	8000000
