# Supplementary material for: An evolutionary recent IFN/IL-6/CEBP axis is linked to monocyte expansion and tuberculosis severity in humans
Source: eLife. 2019 Oct 22;8:e47013. doi: 10.7554/eLife.47013 (PMC6819084; doi:10.7554/eLife.47013)
Supplement: Figure 1—source data 1. [file elife-47013-fig1-data1.xlsx]

## Sheet: Sheet1
Fig. 1c
CD34+	CD14+
73.1	73.7
88.6	75
89.2	42.4
76.6	61.3
60	91.1
68.8	96.4
56.8	98.8
68.9	97.9
40.1
46.2
59.5
Fig. 1d
CD34+		CD14+
Uninf.	Mtb	Uninf.	Mtb
11.2	238	22.9	1473
13	291	23.8	1700
9.36	395	25.5	846
13	237	26.9	1124
14.1	162	43.5	1752
16.6	270	52.7	1867
20.8	290	56.5	1736
28	220	62.8	575
23.8	104	85	499
23.5	110	83.5	573
	188
Fig. 1e
4h	1d	3d	5d
14000	10000	42000	320000
24000	10000	48000	400000
4000	7000	61000	130000
2000	8000	10000	780000
8000	6000	44000	760000
12000	0	6000	400000
Fig. 1f
1d	5d
7	9
8	11
5	20
1	15
0	12
0	23
0	5
2	10
	10
	11
	4
Fig. 1g
Uninf.	Mtb
5	10
3	16
4	8
3	7
6	10
14	10
3	3
5	8
0	9
3	12
4	4
