# Supplementary material for: An evolutionary recent IFN/IL-6/CEBP axis is linked to monocyte expansion and tuberculosis severity in humans
Source: eLife. 2019 Oct 22;8:e47013. doi: 10.7554/eLife.47013 (PMC6819084; doi:10.7554/eLife.47013)
Supplement: Figure 2—figure supplement 1—source data 1. [file elife-47013-fig2-figsupp1-data1.xlsx]

## Sheet: Sheet1
Fig. S2b
CD4+CD64+/CD34+ (%)			CD38+HLA-DR+/CD34+
Uninf.	Mtb		Uninf.	Mtb
6.01	13.1		8.12	45.8
11.9	51.6		44.5	75.6
16.4	19.8			62.2
Fig. S2c
CD4+CD64+/CD34+ (%)				CD38+HLA-DR+/CD34+
Uninf.	Mtb	HK Mtb		Uninf.	Mtb	HK Mtb
1.72	40.2	13.2		47.3	70.7	88.8
0	28.8	32		19.8	62.3	78.7
0	31.2	22.2		29.2	85.7	97.2
1.62	27	7.1		59.2	73
10.8	21.3	8.11		15.5	82.3
6.94	14.2	29.4		23.8	77.4
13.2	51.5			12.1	83.3
7.69	54.3
5.95	48.2
6.92	47
Fig. S2d
CD38 MFI/CD34+				HLA-DR MFI/CD34+				CD4 MFI/CD34+				CD64 MFI/CD34+
Unst.	AraLAM	gDNA		Unst.	AraLAM	gDNA		Unst.	AraLAM	gDNA		Unst.	AraLAM	gDNA
418	757	2268		89.9	107	127		321	115	163		5.62	8.18	7.41
220	2171	3821		55.2	321	91.2		141	80.5	12.8		4.86	10.5	12.3
478	2171	2630		89.9	195	145		109	38.5	101		7.41	7.16	8.18
360	2119	3000		59.1	93.8	57.3		104		84.3		8.44		11
804		704		92.4		427		23.9				1.79
1234		2335		86.1		521		19.9				8.95
1208		1202		41.1		310		5.62				3.83
901		1798		43.5		174		3.85				1.79
3329				62.5		127		104				8.95
2153				37.8		91.2		119				3.83
756				40.7		145		80.5				23.6
4751				34.9		57.3		120				19.7
1125				62.9		64.5		92.1				29.5
278				103		173		85.2				34.5
621				57.8		62		122				23.9
336				79.6		83.7		78.7				10.1
325				62.5				23.9				12.8
449				37.8				19.9				109
338				40.7								16.7
1154				34.9								0
960				36.6								0
827				43.6								16.6
1025				42.5								17.9
1501				71.5								9.72
1049				27.4								5.13
1768				43.3
573				24.6
482
738
238
451
577
Fig. S2e
FVS+ cells (%)
Uninf.	Mtb	HK Mtb
14	12	9.5
10	10.8	13
Fig. S2f
LDH release
Uninf.	Mtb
0.5196	0.5668
1.2182	1.0955
2.8224	2.945
0.834	0.8483
2.6939	3.3515
2.8347	2.8874
2.3666	2.5773
