# Supplementary material for: An evolutionary recent IFN/IL-6/CEBP axis is linked to monocyte expansion and tuberculosis severity in humans
Source: eLife. 2019 Oct 22;8:e47013. doi: 10.7554/eLife.47013 (PMC6819084; doi:10.7554/eLife.47013)
Supplement: Figure 2—source data 2. [file elife-47013-fig2-data2.xlsx]

## Sheet: Sheet1
Fig. 2b
sample_id	conditions	ann	comparison	B CELL	GRAN/MONO	HSC/early ERY	LATE ERY	T CELL
mapping.AB1_48214312_L001_Aligned.out.bam	mapping.AB1_48214312_L001_Aligned.out.bam	Un_24h	Un_24h D1_Un	-0.0970456	-0.785642	0.507624	-0.0675487	0.14475
mapping.AB1_48214312_L002_Aligned.out.bam	mapping.AB1_48214312_L002_Aligned.out.bam	Un_24h	Un_24h D1_Un	-0.492295	-0.685137	0.519595	0.00383492	0.637643
mapping.AB1_48214312_L003_Aligned.out.bam	mapping.AB1_48214312_L003_Aligned.out.bam	Un_24h	Un_24h D1_Un	-0.196003	-0.884143	0.446664	0.00308283	0.513041
mapping.AB1_48214312_L004_Aligned.out.bam	mapping.AB1_48214312_L004_Aligned.out.bam	Un_24h	Un_24h D1_Un	-0.222217	-0.988279	0.392797	0.0311771	0.268589
mapping.AB1_48548676_L001_Aligned.out.bam	mapping.AB1_48548676_L001_Aligned.out.bam	Un_24h	Un_24h D1_Un	-0.249275	-0.65714	0.420662	0.019121	0.342608
mapping.AB1_48548676_L002_Aligned.out.bam	mapping.AB1_48548676_L002_Aligned.out.bam	Un_24h	Un_24h D1_Un	-0.0619453	-0.646099	0.392847	0.0150529	0.296804
mapping.AB1_48548676_L003_Aligned.out.bam	mapping.AB1_48548676_L003_Aligned.out.bam	Un_24h	Un_24h D1_Un	-0.058277	-0.861572	0.464252	-0.0155256	0.674617
mapping.AB1_48548676_L004_Aligned.out.bam	mapping.AB1_48548676_L004_Aligned.out.bam	Un_24h	Un_24h D1_Un	-0.295966	-0.864004	0.47594	-0.0173499	0.354114
mapping.AB2_48220173_L001_Aligned.out.bam	mapping.AB2_48220173_L001_Aligned.out.bam	Mtb_24h	Mtb_24h D1_Mtb	0.00916832	-0.19931	0.0197612	-0.00748139	-0.258958
mapping.AB2_48220173_L002_Aligned.out.bam	mapping.AB2_48220173_L002_Aligned.out.bam	Mtb_24h	Mtb_24h D1_Mtb	-0.0701213	-0.296413	0.0946474	0.00328326	-0.465939
mapping.AB2_48220173_L003_Aligned.out.bam	mapping.AB2_48220173_L003_Aligned.out.bam	Mtb_24h	Mtb_24h D1_Mtb	0.0302852	-0.243617	0.100698	-0.0401716	-0.0216896
mapping.AB2_48220173_L004_Aligned.out.bam	mapping.AB2_48220173_L004_Aligned.out.bam	Mtb_24h	Mtb_24h D1_Mtb	-0.142412	-0.321356	0.0692737	-0.0522336	-0.0986964
mapping.AB2_48553669_L001_Aligned.out.bam	mapping.AB2_48553669_L001_Aligned.out.bam	Mtb_24h	Mtb_24h D1_Mtb	-0.0406215	-0.589985	0.117865	0.0184536	-0.325345
mapping.AB2_48553669_L002_Aligned.out.bam	mapping.AB2_48553669_L002_Aligned.out.bam	Mtb_24h	Mtb_24h D1_Mtb	-0.100356	-0.258124	0.0775745	-0.0072488	-0.62421
mapping.AB2_48553669_L003_Aligned.out.bam	mapping.AB2_48553669_L003_Aligned.out.bam	Mtb_24h	Mtb_24h D1_Mtb	-0.0780227	-0.218315	0.100235	-0.0235144	-0.190111
mapping.AB2_48553669_L004_Aligned.out.bam	mapping.AB2_48553669_L004_Aligned.out.bam	Mtb_24h	Mtb_24h D1_Mtb	0.0385187	-0.312711	-0.00376627	-0.0119018	-0.171645
mapping.AB3_48220174_L001_Aligned.out.bam	mapping.AB3_48220174_L001_Aligned.out.bam	Un_72h	Un_72h D1_Un	-0.122499	-0.47475	0.607084	0.221392	0.242414
mapping.AB3_48220174_L002_Aligned.out.bam	mapping.AB3_48220174_L002_Aligned.out.bam	Un_72h	Un_72h D1_Un	-0.185621	-0.676762	0.694833	0.264815	0.430142
mapping.AB3_48220174_L003_Aligned.out.bam	mapping.AB3_48220174_L003_Aligned.out.bam	Un_72h	Un_72h D1_Un	-0.0999612	-0.563203	0.641792	0.224521	0.137142
mapping.AB3_48220174_L004_Aligned.out.bam	mapping.AB3_48220174_L004_Aligned.out.bam	Un_72h	Un_72h D1_Un	0.0818465	-0.181329	0.632559	0.269388	0.536604
mapping.AB3_48547690_L001_Aligned.out.bam	mapping.AB3_48547690_L001_Aligned.out.bam	Un_72h	Un_72h D1_Un	-0.172754	-0.886105	0.672509	0.259878	0.104754
mapping.AB3_48547690_L002_Aligned.out.bam	mapping.AB3_48547690_L002_Aligned.out.bam	Un_72h	Un_72h D1_Un	-0.123291	-0.41661	0.657096	0.34521	0.0736159
mapping.AB3_48547690_L003_Aligned.out.bam	mapping.AB3_48547690_L003_Aligned.out.bam	Un_72h	Un_72h D1_Un	-0.252597	-0.285152	0.605256	0.196811	-0.0551932
mapping.AB3_48547690_L004_Aligned.out.bam	mapping.AB3_48547690_L004_Aligned.out.bam	Un_72h	Un_72h D1_Un	-0.19242	-0.704836	0.585039	0.279564	0.136804
mapping.AB4_48222179_L001_Aligned.out.bam	mapping.AB4_48222179_L001_Aligned.out.bam	Mtb_72h	Mtb_72h D1_Mtb	0.0664373	0.459685	0.376253	0.208503	0.611549
mapping.AB4_48222179_L002_Aligned.out.bam	mapping.AB4_48222179_L002_Aligned.out.bam	Mtb_72h	Mtb_72h D1_Mtb	-0.0227468	0.624317	0.476834	0.0984257	0.270132
mapping.AB4_48222179_L003_Aligned.out.bam	mapping.AB4_48222179_L003_Aligned.out.bam	Mtb_72h	Mtb_72h D1_Mtb	-0.0084902	0.555698	0.396589	0.163102	0.225302
mapping.AB4_48222179_L004_Aligned.out.bam	mapping.AB4_48222179_L004_Aligned.out.bam	Mtb_72h	Mtb_72h D1_Mtb	0.137735	0.594495	0.410182	0.124288	0.241745
mapping.AB4_48549684_L001_Aligned.out.bam	mapping.AB4_48549684_L001_Aligned.out.bam	Mtb_72h	Mtb_72h D1_Mtb	0.301283	0.528107	0.390078	0.186652	0.49422
mapping.AB4_48549684_L002_Aligned.out.bam	mapping.AB4_48549684_L002_Aligned.out.bam	Mtb_72h	Mtb_72h D1_Mtb	0.142701	0.552967	0.337382	0.173682	0.186655
mapping.AB4_48549684_L003_Aligned.out.bam	mapping.AB4_48549684_L003_Aligned.out.bam	Mtb_72h	Mtb_72h D1_Mtb	0.0468493	0.718638	0.42485	0.149754	0.74674
mapping.AB4_48549684_L004_Aligned.out.bam	mapping.AB4_48549684_L004_Aligned.out.bam	Mtb_72h	Mtb_72h D1_Mtb	0.267842	0.673718	0.430138	0.118019	0.28402
mapping.AB5_48208566_L001_Aligned.out.bam	mapping.AB5_48208566_L001_Aligned.out.bam	Un_120h	Un_120h D1_Un	-0.559812	0.302377	0.714269	0.360311	-0.526969
mapping.AB5_48208566_L002_Aligned.out.bam	mapping.AB5_48208566_L002_Aligned.out.bam	Un_120h	Un_120h D1_Un	-0.353549	0.0419252	0.611524	0.370287	0.0212252
mapping.AB5_48208566_L003_Aligned.out.bam	mapping.AB5_48208566_L003_Aligned.out.bam	Un_120h	Un_120h D1_Un	-0.348689	0.221371	0.609678	0.47281	-0.402664
mapping.AB5_48208566_L004_Aligned.out.bam	mapping.AB5_48208566_L004_Aligned.out.bam	Un_120h	Un_120h D1_Un	-0.252313	-0.0660772	0.681616	0.343325	-0.320848
mapping.AB5_48551694_L001_Aligned.out.bam	mapping.AB5_48551694_L001_Aligned.out.bam	Un_120h	Un_120h D1_Un	-0.419466	0.33844	0.616665	0.37481	-0.153886
mapping.AB5_48551694_L002_Aligned.out.bam	mapping.AB5_48551694_L002_Aligned.out.bam	Un_120h	Un_120h D1_Un	-0.254761	0.121243	0.66814	0.40763	-0.546828
mapping.AB5_48551694_L003_Aligned.out.bam	mapping.AB5_48551694_L003_Aligned.out.bam	Un_120h	Un_120h D1_Un	-0.00458226	0.152552	0.617874	0.342757	0.144613
mapping.AB5_48551694_L004_Aligned.out.bam	mapping.AB5_48551694_L004_Aligned.out.bam	Un_120h	Un_120h D1_Un	0.0679351	-0.118285	0.62847	0.395157	-0.12359
mapping.AB6_48225184_L001_Aligned.out.bam	mapping.AB6_48225184_L001_Aligned.out.bam	Mtb_120h	Mtb_120h D1_Mtb	-0.00705727	1.14987	0.165791	0.237745	-0.549516
mapping.AB6_48225184_L002_Aligned.out.bam	mapping.AB6_48225184_L002_Aligned.out.bam	Mtb_120h	Mtb_120h D1_Mtb	0.122757	1.21756	0.199679	0.266105	-0.273822
mapping.AB6_48225184_L003_Aligned.out.bam	mapping.AB6_48225184_L003_Aligned.out.bam	Mtb_120h	Mtb_120h D1_Mtb	-0.0800014	1.15344	0.205106	0.206493	-0.19342
mapping.AB6_48225184_L004_Aligned.out.bam	mapping.AB6_48225184_L004_Aligned.out.bam	Mtb_120h	Mtb_120h D1_Mtb	0.04495	1.21736	0.237605	0.163278	-0.465012
mapping.AB6_48556725_L001_Aligned.out.bam	mapping.AB6_48556725_L001_Aligned.out.bam	Mtb_120h	Mtb_120h D1_Mtb	-0.0623256	1.22937	0.202724	0.295452	-0.572131
mapping.AB6_48556725_L002_Aligned.out.bam	mapping.AB6_48556725_L002_Aligned.out.bam	Mtb_120h	Mtb_120h D1_Mtb	0.0247275	1.17103	0.138288	0.216947	-0.371091
mapping.AB6_48556725_L003_Aligned.out.bam	mapping.AB6_48556725_L003_Aligned.out.bam	Mtb_120h	Mtb_120h D1_Mtb	-0.0701054	1.14723	0.16896	0.180061	-0.124093
mapping.AB6_48556725_L004_Aligned.out.bam	mapping.AB6_48556725_L004_Aligned.out.bam	Mtb_120h	Mtb_120h D1_Mtb	0.0398807	1.16655	0.153546	0.257157	-0.294588
mapping.AB10_S1_L001_Aligned.out.bam	mapping.AB10_S1_L001_Aligned.out.bam	Un_24h	Un_24h D3_Un	0.0192913	-0.70662	-0.265572	-0.334098	-0.210036
mapping.AB10_S1_L002_Aligned.out.bam	mapping.AB10_S1_L002_Aligned.out.bam	Un_24h	Un_24h D3_Un	0.282997	-0.378592	-0.290345	-0.323351	-0.032865
mapping.AB10_S1_L003_Aligned.out.bam	mapping.AB10_S1_L003_Aligned.out.bam	Un_24h	Un_24h D3_Un	0.127729	-0.475395	-0.262972	-0.3046	0.0569262
mapping.AB11_S2_L001_Aligned.out.bam	mapping.AB11_S2_L001_Aligned.out.bam	Mtb_24h	Mtb_24h D3_Mtb	0.173052	-0.578392	-0.45449	-0.381874	-0.531319
mapping.AB11_S2_L002_Aligned.out.bam	mapping.AB11_S2_L002_Aligned.out.bam	Mtb_24h	Mtb_24h D3_Mtb	0.248562	-0.519928	-0.387935	-0.383957	-0.559665
mapping.AB11_S2_L003_Aligned.out.bam	mapping.AB11_S2_L003_Aligned.out.bam	Mtb_24h	Mtb_24h D3_Mtb	-0.0886766	-0.560266	-0.440906	-0.368503	-0.343452
mapping.AB12_S3_L001_Aligned.out.bam	mapping.AB12_S3_L001_Aligned.out.bam	Mtb_72h	Mtb_72h D3_Mtb	0.245874	0.284862	-0.408843	-0.386472	-0.185058
mapping.AB12_S3_L002_Aligned.out.bam	mapping.AB12_S3_L002_Aligned.out.bam	Mtb_72h	Mtb_72h D3_Mtb	0.489667	0.375669	-0.313942	-0.376501	0.151463
mapping.AB12_S3_L003_Aligned.out.bam	mapping.AB12_S3_L003_Aligned.out.bam	Mtb_72h	Mtb_72h D3_Mtb	0.257509	0.436373	-0.398408	-0.4101	-0.0253573
mapping.AB13_S4_L001_Aligned.out.bam	mapping.AB13_S4_L001_Aligned.out.bam	Un_120h	Un_120h D3_Un	0.1264	0.0678346	-0.135415	-0.364228	-0.305662
mapping.AB13_S4_L002_Aligned.out.bam	mapping.AB13_S4_L002_Aligned.out.bam	Un_120h	Un_120h D3_Un	0.0651342	0.212945	-0.173967	-0.312023	-0.237686
mapping.AB13_S4_L003_Aligned.out.bam	mapping.AB13_S4_L003_Aligned.out.bam	Un_120h	Un_120h D3_Un	0.187872	0.213153	-0.0771257	-0.313003	-0.414919
mapping.AB14_S5_L001_Aligned.out.bam	mapping.AB14_S5_L001_Aligned.out.bam	Mtb_120h	Mtb_120h D3_Mtb	0.266409	0.823721	-0.358033	-0.534399	-0.679202
mapping.AB14_S5_L002_Aligned.out.bam	mapping.AB14_S5_L002_Aligned.out.bam	Mtb_120h	Mtb_120h D3_Mtb	0.680909	1.25024	-0.382281	-0.314278	-0.405345
mapping.AB14_S5_L003_Aligned.out.bam	mapping.AB14_S5_L003_Aligned.out.bam	Mtb_120h	Mtb_120h D3_Mtb	0.334224	1.16363	-0.299422	-0.387924	-0.622214
mapping.AB15_S6_L001_Aligned.out.bam	mapping.AB15_S6_L001_Aligned.out.bam	Un_24h	Un_24h D4_Un	0.369896	-0.315373	-1.31005	-1.05416	-0.0127058
mapping.AB15_S6_L002_Aligned.out.bam	mapping.AB15_S6_L002_Aligned.out.bam	Un_24h	Un_24h D4_Un	-1.01179	-0.502212	-0.444948	-0.340651	-1.23565
mapping.AB15_S6_L003_Aligned.out.bam	mapping.AB15_S6_L003_Aligned.out.bam	Un_24h	Un_24h D4_Un	0.065239	-1.37592	-0.612799	-0.859532	-0.380889
mapping.AB16_S7_L001_Aligned.out.bam	mapping.AB16_S7_L001_Aligned.out.bam	Mtb_24h	Mtb_24h D4_Mtb	0.0874439	-0.804064	-0.277952	-0.598023	-0.731608
mapping.AB16_S7_L002_Aligned.out.bam	mapping.AB16_S7_L002_Aligned.out.bam	Mtb_24h	Mtb_24h D4_Mtb	0.0374259	-0.357562	-0.215749	-0.447892	-0.621365
mapping.AB16_S7_L003_Aligned.out.bam	mapping.AB16_S7_L003_Aligned.out.bam	Mtb_24h	Mtb_24h D4_Mtb	-0.0503651	-0.38693	-0.248428	-0.443837	-0.657552
mapping.AB17_S8_L001_Aligned.out.bam	mapping.AB17_S8_L001_Aligned.out.bam	Un_72h	Un_72h D4_Un	0.302754	-0.407562	0.120832	-0.391617	0.203955
mapping.AB17_S8_L002_Aligned.out.bam	mapping.AB17_S8_L002_Aligned.out.bam	Un_72h	Un_72h D4_Un	0.30256	-0.444331	0.0878068	-0.35249	0.212732
mapping.AB17_S8_L003_Aligned.out.bam	mapping.AB17_S8_L003_Aligned.out.bam	Un_72h	Un_72h D4_Un	0.307716	-0.374884	0.0928456	-0.367856	0.462675
mapping.AB18_S9_L001_Aligned.out.bam	mapping.AB18_S9_L001_Aligned.out.bam	Mtb_72h	Mtb_72h D4_Mtb	0.279867	0.0135888	-0.165832	-0.339821	-0.300396
mapping.AB18_S9_L002_Aligned.out.bam	mapping.AB18_S9_L002_Aligned.out.bam	Mtb_72h	Mtb_72h D4_Mtb	0.210278	0.126349	-0.0548762	-0.26805	-0.0352947
mapping.AB18_S9_L003_Aligned.out.bam	mapping.AB18_S9_L003_Aligned.out.bam	Mtb_72h	Mtb_72h D4_Mtb	0.155015	0.143747	-0.0500803	-0.312267	0.0700379
mapping.AB19_S10_L001_Aligned.out.bam	mapping.AB19_S10_L001_Aligned.out.bam	Un_120h	Un_120h D4_Un	0.0615289	0.206416	-0.0458105	-0.477509	-0.315394
mapping.AB19_S10_L002_Aligned.out.bam	mapping.AB19_S10_L002_Aligned.out.bam	Un_120h	Un_120h D4_Un	0.0663393	0.277202	0.0729903	-0.397821	-0.422827
mapping.AB19_S10_L003_Aligned.out.bam	mapping.AB19_S10_L003_Aligned.out.bam	Un_120h	Un_120h D4_Un	-0.239302	0.257453	0.0611749	-0.396519	-0.268006
mapping.AB20_S11_L001_Aligned.out.bam	mapping.AB20_S11_L001_Aligned.out.bam	Mtb_120h	Mtb_120h D4_Mtb	0.68248	0.753194	-0.245671	-0.543364	-0.0158715
mapping.AB20_S11_L002_Aligned.out.bam	mapping.AB20_S11_L002_Aligned.out.bam	Mtb_120h	Mtb_120h D4_Mtb	0.520135	1.01223	-0.226397	-0.416368	-0.26465
mapping.AB20_S11_L003_Aligned.out.bam	mapping.AB20_S11_L003_Aligned.out.bam	Mtb_120h	Mtb_120h D4_Mtb	0.62407	0.931233	-0.124318	-0.520308	-0.359755
Fig. 2d
Uninf.	Mtb
24.3	41
14	18.7
21.6	26
24	28.7
17.8	27.2
31.2	39.1
22.9	28.6
Fig. 2g
Uninf.	H37Rv	HK H37Rv
9.3	16.9	22.3
7.4	27.8	15.4
16.8	29.5	14.4
11.4	19	15
20.4	25.6	8.79
14.7	16.9	16.9
15.5	20.3
15.2	18.9
6.62	14.2
Fig. 2h
Uninf.	Mtb-CS267
13	29.7
16.4	38.9
