# Supplementary material for: An evolutionary recent IFN/IL-6/CEBP axis is linked to monocyte expansion and tuberculosis severity in humans
Source: eLife. 2019 Oct 22;8:e47013. doi: 10.7554/eLife.47013 (PMC6819084; doi:10.7554/eLife.47013)
Supplement: Figure 3—figure supplement 1—source data 1. [file elife-47013-fig3-figsupp1-data1.xlsx]

## Sheet: Sheet1
Fig. S3a
CD14+ cells (%)
Uninf.	Mtb-CS267
5.5	13.9
3.13	11.7
Fig. S3b
Days	Uninf.	Mtb
1d	0.48	0.57
3d	2.68	3.83
5d	4.63	5.58
7d	7.74	10.1
10d	12.5	18.7
Fig. S3c
CD235a+ cells (%)
Uninf.	Mtb
7.46	6.41
5.89	2.49
7.59	5.52
