# Supplementary material for: An evolutionary recent IFN/IL-6/CEBP axis is linked to monocyte expansion and tuberculosis severity in humans
Source: eLife. 2019 Oct 22;8:e47013. doi: 10.7554/eLife.47013 (PMC6819084; doi:10.7554/eLife.47013)
Supplement: Figure 3—source data 1. [file elife-47013-fig3-data1.xlsx]

## Sheet: Sheet1
Fig. 3e
Uninf.	Mtb	HK Mtb
3.13	11.7	3.27
3.24	12	7.07
3.83	16.1	6.78
3.13	11.7	4.05
4.54	6.35
3.07	5.26
3.69	7.26
10.5	17.8
6.72	10.8
Fig. 3f
Uninf.	Mtb	HK Mtb
2.97	5.37	4.27
3.95	6.47	3.34
6.71	10.1	4.24
3.69	4.26	8.76
10.1	8.58
6.55	7.61
5.26	12.5
Fig. 3g
Uninf.	Mtb	HK Mtb
9.62	6.99	8.34
10.4	7.81	9.13
5.36	4.75	6.54
4	7.19	8.5
Fig. 3h
Uninf.	Mtb	HK Mtb
20.5	15.3	21.1
14.4	13.1	16.9
25.7	28.3	11.7
21.4	15.5
8.86	10.1
Fig. 3j
Uninf.	Mtb
0.53	1.9
0.58	2.51
0.81	0.63
1.18	2.13
1.04	1.15
0.29	0.54
0.35	4.57
0.22	0.21
