# Supplementary material for: An evolutionary recent IFN/IL-6/CEBP axis is linked to monocyte expansion and tuberculosis severity in humans
Source: eLife. 2019 Oct 22;8:e47013. doi: 10.7554/eLife.47013 (PMC6819084; doi:10.7554/eLife.47013)
Supplement: Figure 4—figure supplement 1—source data 1. [file elife-47013-fig4-figsupp1-data1.xlsx]

## Sheet: Sheet1
Fig. S4a
CD4+CD64+/CD34+ (%)
Media + Cytokine cocktail	Media + rhIL-6 20 ng/mL
6.62	14.2
Fig. S4b
Normalized count (IL-6R)
	Uninf.														Mtb
1d	8.46191	8.66289	8.52841	8.50684	8.32593	8.49925	8.64755	8.51873	9.73978	9.79023	9.793	9.78265	9.21817	9.24033	9.53429	9.42584	9.55741	9.54364	9.48059	9.50934	9.47399	9.57049	9.87764	9.78304	9.9362	9.78114	9.88331	9.81901
3d	9.08631	9.10803	8.96765	9.14626	9.1617	9.24576	9.11592	9.06649				9.66533	9.58696	9.77532	9.88713	9.68577	9.80489	9.75229	9.82811	9.60794	9.83149	9.74993	10.0209	9.98286	9.89005	9.9176	9.95855	9.98336
5d	9.3995	9.29287	9.2501	9.34921	9.11519	9.07951	9.10612	9.13388	10.126	10.094	10.1031	10.0542	10.0742	10.0636	9.90328	10.0358	9.97707	9.99873	9.94675	9.91989	9.9104	10.0378	10.2979	10.4057	10.3039	10.164	10.2121	10.1058
Normalized count (IL-6)
	Uninf.														Mtb
1d	0	0	0	1.7207	0	0	0	0	0	0	0	0	0	0	1.671	0	1.68838	2.91415	0	0	2.4322	0	0	0	0	0	1.12877	0
3d	0	0	0	0	0	1.90399	0	0				1.3683	0	0	1.74928	3.40883	2.53055	3.01789	3.00369	1.77095	2.52732	3.44433	1.98805	2.43553	0	1.00726	0.983593	0
5d	0	0	0	0	0	0	0	0	0	1.71298	0	0	0	0	4.44223	4.28133	4.07163	4.25996	4.59498	3.52587	3.81006	4.49456	2.08049	4.06707	3.89529	2.74097	4.23263	4.43331
Fig. S4c
gene	1d					3d					5d
IL6	128.262	26.1188	36.102	32.5746		72.221	62.6802	90.96			0.123092	12.2538	51.483	172.596
IFNA2A	4.15128	1.23079	1	1		4	2	92.4867	12.1333		0.043693	9.72007	1	1
IFNB	1.1415	1.60764	1	1		2.09935	0.724476	1	11		2.04744	1.57611	1	1
IFNG	0.566224	0.43856	9.949			0.884442	0.644776	0.844			1.13613	0.892346	0.003
Fig. S4d
gene	1d					3d					5d
MX1	5.61		1.91	2.128	1.83925	61.39		38.086	20.669	0.55293	47.5	51.518	53.661	22.547	3.99263
ISG15			1.527	0.874	1.80664			110.875	21.23	1.50717		12.068	48.238	22.326	2.35091
IFI16			0.626	1.346				3.39	1.935			1.107	96.216	1.336
GRB2	1.27544	1.12272				0.986916	0.98214				2.32141	3.53326
IL1RA	2.127	1.85961				6.6807	2.76064				17.9138	8.08361
CXCL8	1.18263	1.95613				0.700278	3915.55				7.8408	45.1295
Fig. S4e
IL-6
days	Uninf.								Mtb
1d	20.0907	8.13938	13.4053	18.9191	20.0907				21.6513	23.9116	33.6681	40.095	22.7887
5d	17.7865	15.5969	19.4356	32.2756	12.9217	27.1496	12.372	19.9028	15.3083	13.0866	61.6247	20.7915	9.65104	33.9246	27.2871	31.309
IFN-g
days	Uninf.	Mtb
1d	0	0
5d	0	0
IL-1b
days	Uninf.					Mtb
1d	0	0.006805	0	0.01549		0.027719	0.009185	0.003656	0.018533	0
5d	0	0.00892	0.0082	0.0124		0	0.118327	0	0.042307	0.070505
TNF
days	Uninf.			Mtb
1d	0	0	0	0	0	0
5d	0	0	0	0	0	0
Fig. S4f
CD38 MFI/CD34+				HLA-DR MFI/CD34+				CD4 MFI/CD34+				CD64 MFI/CD34+
Uninf.	Mtb	HK Mtb		Uninf.	Mtb	HK Mtb		Uninf.	Mtb	HK Mtb		Uninf.	Mtb	HK Mtb
3329	12137	4319		141	1170	457		104	347	49.9		75.2	148	35.9
2153	12656	2598		79.6	1480	515		119	312	87.6		26.5	146	39
756	8795	4492		49.9	412	560		80.5	277	144		35.1	161	42.5
4751	21837	1863		159	1005	417		120	417	181		28.3	127	24.4
1125	12582	1403		36.6	1357	392		92.1	207			23.3	51	38.5
278	10653	618		43.6	603	1273		85.2	207			27.5	52.1	61.6
621	6652	1047		42.5	849	1386		122	156			5.62	91.5	64.2
336	4964			71.5	853			78.7	148			4.86	68.7
255	5180			81.1	651			23.9	118			7.42	76.1
390	6108			45.1	190			19.9	45.6			8.44	74.5
804	5104
799	14254
Fig. S4g
STAT1
Mtb	HK Mtb
9.17	1.13
CEBPA
Mtb	HK Mtb
1.20773	0.499
1.23304	0.788973
0.729
0.789
1.0224
CEBPB
Mtb	HK Mtb
2.30543	0.427
2.18371	0.990955
1.464
1.27
2.51228
Fig. S4h
STAT1
Mtb		Mtb + αIL6R		Mtb + αIFNAR2
1.768	3.079	3.043	2.436	0.353	0.29
MX1
Mtb		Mtb + αIL6R		Mtb + αIFNAR2
26.484	30.375	24.885	32.259	0.211	0.21
Fig. S4i
Neutrophils (%)
Uninf.	Mtb	Mtb+ αIFNAR2
2.18	5.75	5.9
3.8	6.78	4.86
Neutrophils (%)
Uninf.	Mtb	Mtb+ αIFNy
6.54	9.72	7.8
8.76	10.9	10.44
Fig. S4j
CD41a (%)
Uninf.	Uninf. + αIL6R	Mtb	Mtb + αIL6R
5.36	4.1	4.75	3.12
4	3.16	3.26	4.81
Fig. S4k
CD235a cell (%)
Uninf.	Uninf. + αIL6R	Mtb	Mtb + αIL6R
7.46	5.84	6.41	5.39
5.83	9.1	6.06	11.2
Fig. S4l
BDCA1+CD14low cell (%)
Uninf.	Uninf. + αIL6R	Mtb	Mtb + αIL6R
20.5	28.2	15.3	20.8
14.4	24.3	13.1	19.9
23.1	36.9	10.8	23.7
