# Supplementary material for: An evolutionary recent IFN/IL-6/CEBP axis is linked to monocyte expansion and tuberculosis severity in humans
Source: eLife. 2019 Oct 22;8:e47013. doi: 10.7554/eLife.47013 (PMC6819084; doi:10.7554/eLife.47013)
Supplement: Figure 4—source data 1. [file elife-47013-fig4-data1.xlsx]

## Sheet: Sheet1
Fig. 4d
Uninf.	Mtb	Mtb+ IFNAR2
9.85	17.9	18.4
7.2	15.4	14.7
Fig. 4e
Uninf.	Mtb	Mtb+ IFN-
3.83	16.1	15.4
3.13	11.7	16.8
Fig. 4g
Uninf.	Uninf. + IL6R	Mtb	Mtb + IL6R
3.13	0.42	11.7	0.3
3.24	0.35	12	1
3.83	3.72	16.1	11.8
3.13	1.41	11.7	7.11
4.54		6.35
3.07		5.26
3.69		7.26
10.5		17.8
6.72		10.8
9.85		17.9
14		22.2
Fig. 4h
Uninf.	Uninf. + IL6R	Mtb	Mtb + IL6R
3.06	0.7	3.68	2.76
9.72	2.4	7.33	3.59
2.18	0.57	5.75	2.5
Fig. 4i
	Mtb						Mtb+IL6R
3d	42000	48000	61000	10000	44000	6000	24000	36000	0
5d	320000	400000	130000	780000	760000	400000	1000000	420000	600000
7d	2800000	2000000	2600000	1700000	1300000	8000000	400000	200000	260000
Fig. 4j
	Mtb	Mtb+IFNAR2
3d	6000	16000
5d	400000	260000
7d	8000000	8000000
Fig. 4k
	Mtb	Mtb + IFN-
3d	78000	60000
5d	120000	82000
7d	2000000	4000000
