# Supplementary material for: An evolutionary recent IFN/IL-6/CEBP axis is linked to monocyte expansion and tuberculosis severity in humans
Source: eLife. 2019 Oct 22;8:e47013. doi: 10.7554/eLife.47013 (PMC6819084; doi:10.7554/eLife.47013)
Supplement: Figure 5—source data 1. [file elife-47013-fig5-data1.xlsx]

## Sheet: Sheet1
Fig. 5c								day	Fold proteome
	day	FC	day	FC IL6	FC IFN		SPTLC1	-451	0.72
CSF2	-381		-381				C2	-183	0.3
IRF1	-366	-0.34	-366	-0.34	-0.34		COX8A	-209	0.69
CXCL10	-299	0.99	-299	0.99	0.99		VAPA	-147	0.52
CFB	-255	0.39	-255	0.39			APEX1	-134	0.4
STAT1	-253	0.99	-253	0.99	0.99		GRN	-180	0.31
CD38	-229	-0.15	-229	-0.15			CCL5	-206	0.71
IL6	-227	0.72	-227	0.72			PDIA6	-183	0.57
IFNAR1	-180	-0.29	-180	-0.29	-0.29		PIAS4	-113	0.38
SERPINA1	-178	0.43	-178	0.43			EIF4G2	-116	0.46
CD34	-173	-0.25	-173	-0.25			RNASE4	-126	0.2
STAT3	-170	0.43	-170	0.43	0.43
MMP9	-167		-167		0.57
KITLG	-160	-0.4	-160	-0.4
CD163	-435	0.53	-435	0.53
HP	-268	0.57	-268	0.57
CRP	-383.9	2.47	-383.9	2.47
PLA2G2A	-894	1.84	-894	1.84
CXCL9	-262.8	1.02	-262.8	1.02	1.02
Fig. 5d
TB plasma proteome	IL6	IL6	IFN/IL6	IFN/IL6	ML ratio	ML ratio	CD34/CD38	CD34/CD38
PLA2G2A	-894	1.84
CD163	-435	0.53								Days before TB diagnosis
CRP	-383.9	2.47								Fold-change
HP	-268	0.57
CFB	-255	0.39
IL6	-227	0.72
SERPINA1	-178	0.43
STAT3	-170	0.43
IRF1			-366	-0.34
CXCL10			-299	0.99
CXCL9			-262.8	1.02
STAT1			-253	0.99
WARS			-229	0.86
IFNAR1			-180	-0.29
MMP9			-167	0.57
WDR1					-505	-0.23
SPTLC1					-451	0.72
CSF2					-381	-0.24
SLC30A3					-374	-0.24
SPHK2					-361	-0.17
COX8A					-209	0.69
CCL5					-206	0.71
C2					-183	0.3
CD97					-183	-0.14
PDIA6					-183	0.57
GRN					-180	0.31
VAPA					-147	0.52
APEX1					-134	0.4
RNASE4					-126	0.2
SCO1					-126	-0.27
EIF4G2					-116	0.46
PIAS4					-113	0.38
CD38							-229	-0.15
CD34							-173	-0.25
KITLG							-160	-0.4
Fig. 5e
1d	CEBPD	6.04721	240	7	0.0292	8.97e-07	0.000138	6.04721
	CEBP	4.61083	267	6	0.0225	2.45e-05	0.00167	4.61083
	CEBPB	3.62342	258	5	0.0194	0.000238	0.00827	3.62342
	STAT3	2.99568	22	2	0.0909	0.00101	0.0249	2.99568
	CEBPA	2.72125	244	4	0.0164	0.0019	0.036	2.72125
	ELF1	2.72125	244	4	0.0164	0.0019	0.036	2.72125
	STAT1	2.6968	248	4	0.0161	0.00201	0.036	2.6968
	CEBP	2.67778	251	4	0.0159	0.0021	0.036	2.67778
3d	ISRE	14.8297	247	18	0.0729	1.48e-15	1.82e-13	14.8297
	ICSBP	13.5969	248	17	0.0685	2.53e-14	2.22e-12	13.5969
	IRF1	10.1186	250	14	0.056	7.61e-11	4.25e-09	10.1186
	STAT3	3.6968	22	3	0.1364	0.000201	0.00258	3.6968
	CEBPB	3.35066	258	7	0.0271	0.000446	0.00472	3.35066
	CEBP	3.26281	267	7	0.0262	0.000546	0.00486	3.26281
	CEBPD	2.76447	240	6	0.025	0.00172	0.0126	2.76447
5d	ISRE	15.5114	15.5114	247	17	0.0688	3.08e-16	8.58e-14
	ICSBP	10.4841	10.4841	248	13	0.0524	3.28e-11	3.42e-09
	IRF1	8.15927	8.15927	250	11	0.044	6.93e-09	5.26e-07
	STAT3	4.02965	4.02965	22	3	0.1364	9.34e-05	0.00211
	CEBPD	3.10568	3.10568	267	6	0.0225	0.000784	0.0119
	CEBP	2.4437	2.4437	251	5	0.0199	0.0036	0.0363
	CEBPB	2.39255	2.39255	258	5	0.0194	0.00405	0.038
Fig. 5f
monocyte count		ML ratio
Latent TB	Active TB	Latent TB	Active TB
0.5	0.7	0.416667	1
0.4	0.5	0.2	0.3125
0.5	1.6	0.172414	2.66667
0.5	0.4	0.208333	0.5
0.5	0.7	0.25	0.583333
0.6	0.6	0.285714	0.461538
0.3	0.5	0.125	0.416667
1.1	0.7	0.6875	0.35
0.5	0.6	0.5	0.75
0.4	0.7	0.25	0.411765
0.8	1	0.444444	0.5
0.5	1	0.147059	0.344828
0.3	0.8	0.166667	0.666667
0.7		0.35
0.7		0.4375
0.6		0.315789
0.4		0.16
Fig. 5g
CEBPB	mono/lympho
3619.83	0.416667
2666.38	0.2
2867.51	0.172414
2287.34	0.208333
4154.26	0.25
3179.25	0.285714
6033.93	0.125
3171.6	0.6875
4154.26	0.5
5972.27	0.25
5112.88	0.444444
3803.81	0.147059
3246.09	0.166667
2950.79	0.35
5221.6	0.4375
3364.55	0.315789
3258.26	0.16
6800.07	1
4205.41	0.3125
8105.22	2.66667
6738.27	0.5
4655.48	0.583333
5573.13	0.461538
4655.48	0.416667
4013.85	0.35
6192.69	0.75
7244.18	0.411765
5112.88	0.5
4723.27	0.344828
	0.666667
Fig. 5h
CEBPB	IL6R
3619.83	152.77
2666.38	131.74
2867.51	101.64
2287.34	75.35
4154.26	186.09
3179.25	138.95
6033.93	176.58
3171.6	116.86
4154.26	145.9
5972.27	244.61
5112.88	182.61
3803.81	121.72
3246.09	136.47
2950.79	125.6
5221.6	209.68
3364.55	134.48
3258.26	128.56
6800.07	238.61
4205.41	251.74
8105.22	244.51
6738.27	231.15
4655.48	179.88
5573.13	237.43
4655.48	175.6
4013.85	120.43
6192.69	183.35
7244.18	229.37
5112.88	186.9
4723.27	201.5
4222.42	112.69
Fig. 5i
CEBPB	STAT3
3619.83	337.48
2666.38	497.02
2867.51	434.71
2287.34	367.75
4154.26	401.42
3179.25	471.86
6033.93	670.39
3171.6	437.26
4154.26	501.25
5972.27	762.64
5112.88	601.37
3803.81	546.56
3246.09	455.72
2950.79	553.43
5221.6	552.29
3364.55	447.71
3258.26	470.67
6800.07	740.03
4205.41	652.83
8105.22	636.66
6738.27	681.29
4655.48	570.01
5573.13	684.54
4655.48	547.17
4013.85	511.3
6192.69	617.5
7244.18	1012.81
5112.88	578.95
4723.27	588.91
4222.42	518.4
Fig. 5j
Negative	Positive
3619.83	6192.69
2666.38	7244.18
2867.51	4723.27
2287.34
4154.26
3179.25
4205.41
6738.27
5573.13
4655.48
4222.42
