# Supplementary material for: An evolutionary recent IFN/IL-6/CEBP axis is linked to monocyte expansion and tuberculosis severity in humans
Source: eLife. 2019 Oct 22;8:e47013. doi: 10.7554/eLife.47013 (PMC6819084; doi:10.7554/eLife.47013)
Supplement: Figure 6—figure supplement 1—source data 1. [file elife-47013-fig6-figsupp1-data1.xlsx]

## Sheet: Sheet1
Fig. S6a
	CBEPA	CEBPB	CEBPD	CEBPE	CEBPG	CEBPZ
mouse	-1.1	0	0	0	0	0
macaque	-0.85	1.88	3.86	0	0.14	0
human	-0.49	1.04	1.09	0	0	0
	CXCL9	CXCL10
mouse	11.3	10.6
macaque	6.2	11.5
human	9.7	11.4
