# Supplementary material for: An evolutionary recent IFN/IL-6/CEBP axis is linked to monocyte expansion and tuberculosis severity in humans
Source: eLife. 2019 Oct 22;8:e47013. doi: 10.7554/eLife.47013 (PMC6819084; doi:10.7554/eLife.47013)
Supplement: Figure 6—source data 1. [file elife-47013-fig6-data1.xlsx]

## Sheet: Sheet1
Fig. 6b
Fig. 6b upper panel	Mean FC	IL6	FDR	Mean FC	IL6R	FDR	Mean FC	IL6ST	FDR	Mean FC	STAT3	FDR	Mean FC	STAT1	FDR	Mean FC	STAT2	FDR	Mean FC	CEBPB	FDR	Mean FC	CEBPA	FDR	Mean FC	CEBPG	FDR	Mean FC	CEBPD	FDR	Mean FC	CEBPE	FDR	Mean FC	CEBPZ	FDR	Mean FC	CD14	FDR	Mean FC	SPI1	FDR	Mean FC	CD38	FDR	ELF1	FDR	Mean FC	ICSBP
Human	0.702389	1.3827	1.55e-05	-0.41276	-0.31153	0.121829	0.181996	0.164479	0.528729	0.645066	0.91696	2.39e-12	3.08856	2.68534	0	3.11766	2.47324	0	0.03673	0.724474	1.53e-05	-0.43754			-0.04141	-0.04691	0.90705	-0.15798	1.33172	1.61e-10	-0.23666			-0.06199	-0.35296	0.051489	0.142213	0.402145	0.078553	0.762743			2.23187	4.81787	4.34e-44	1.15669	4.05e-11	2.74184
Rattus norvegicus (Brown Rat)		0.198681	0.227904		0.042677	0.881254		-0.1877	0.029708		0.245879	0.004021		3.11165	0		4.65948	0		-0.05521	0.86046		-0.38055	0.023984		-0.16889	0.066248		-0.37736	0.299064					-0.11902	0.210327		0.093782	0.456906					0.19538	0.057181	0.615582	1.32e-18		0.192755
Bos taurus (Cattle)		-0.72401	0.475249		-0.9151	0.000492		0.022543	0.958851		0.461301	0.050812		2.43718	0		2.84844	0		-0.52532	0.000325		-0.99993	0.000893		-0.01915	0.937904		-1.17272	2.7e-05					-0.16885	0.364131		0.602145	0.010676							1.15093	1.05e-14
Ovis aries (Sheep)		1.76849	5.65e-22		-0.70416	0.036951		0.286031	0.114817		0.3764	0.011985		2.72147	0		2.70967	0					0.067846	0.831016		0.046414	0.866686		-0.41356	0.396972					0.250758	0.171107		-0.18866	0.537892					1.68237	6.49e-09	0.471213	0.064593
Sus scrofa (Pig)					-0.42334	0.099847		0.81946	7.55e-13		0.95904	5.79e-09		3.77714	0		4.18943	0								0.295129	0.01748								0.084247	0.502867		0.337496	0.022146							1.91193	0		6.83279
Sus scrofa (Pig)								0.070366	0.829098		0.399098	0.095637		3.90267	0		3.34329	0		-0.13179	0.418502					-0.03818	0.927226					-0.23666	0.355317		-0.06378	0.858244		0.289469	0.107298							0.449884	0.002198
Equus caballus (Horse)					-0.30945	0.636265		0.022099	0.930405		0.045133	0.832914		2.29344	0		1.77453	0		0.534989	2.01e-06					-0.00748	0.983145								0.046418	0.867398										0.278476	0.018875
Canis familiaris (Dog)								-0.2334	0.099145		1.97696	0		2.0262	0		1.84024	4.67e-17		-0.13611	0.552046					-0.30492	0.222108								-0.28407	0.029982		-0.34708	0.214474							1.48637	0		2.44953
Pteropus vampyrus (Large Flying Fox)		2.67099	0		-0.75566	0.028927		0.200256	0.530742		0.631989	6.42e-06		3.62424	0		3.48434	0		-0.15392	0.402221					-0.13744	0.698395								0.040535	0.92535		-0.0516	0.917505							1.60211	2.45e-18		1.87904
Myotis lucifugus (Little Brown Bat)		-0.4486	0.334135		0.074476	0.904443		0.285701	0.186949		0.437899	0.009716		3.31893	0		3.09665	0								-0.03271	0.871042								-0.05314	0.76838					0.762743	0.004287				0.41169	0.000895		2.35507
Gallus gallus (Chicken)		0.068474	0.7785					0.55212	0.000505					4.07592	0		3.87499	0
Fig. 6b lower panel
Number of values*	1*	7*		1*	8*		1*	11*		1*	10*		1*	11*		1*	11*		1*	7*		1*	3*		1*	10*		1*	4*		1*	1*		1*	10*		1*	8*		1*	1*		1*	3*		10*		1*	5*
Minimum*	0.7024*	-0.724*		-0.4128*	-0.9151*		0.182*	-0.2334*		0.6451*	0.04513*		3.089*	2.026*		3.118*	1.775*		0.03673*	-0.5253*		-0.4375*	-0.9999*		-0.04141*	-0.3049*		-0.158*	-1.173*		-0.2367*	-0.2367*		-0.06199*	-0.353*		0.1422*	-0.3471*		0.7627*	0.7627*		2.232*	0.1954*		0.2785*		2.742*	0.1928*
25% Percentile*	0.7024*	-0.4486*		-0.4128*	-0.7428*		0.182*	0.0221*		0.6451*	0.3438*		3.089*	2.437*		3.118*	2.473*		0.03673*	-0.1539*		-0.4375*	-0.9999*		-0.04141*	-0.1453*		-0.158*	-0.9829*		-0.2367*	-0.2367*		-0.06199*	-0.1977*		0.1422*	-0.1544*		0.7627*	0.7627*		2.232*	0.1954*		0.4403*		2.742*	1.036*
Median*	0.7024*	0.1987*		-0.4128*	-0.3674*		0.182*	0.1645*		0.6451*	0.4496*		3.089*	3.112*		3.118*	3.097*		0.03673*	-0.1318*		-0.4375*	-0.3806*		-0.04141*	-0.03545*		-0.158*	-0.3955*		-0.2367*	-0.2367*		-0.06199*	-0.05846*		0.1422*	0.1916*		0.7627*	0.7627*		2.232*	1.682*		0.8833*		2.742*	2.355*
75% Percentile*	0.7024*	1.768*		-0.4128*	-0.04535*		0.182*	0.286*		0.6451*	0.9275*		3.089*	3.777*		3.118*	3.875*		0.03673*	0.535*		-0.4375*	0.06785*		-0.04141*	0.005994*		-0.158*	0.9045*		-0.2367*	-0.2367*		-0.06199*	0.05588*		0.1422*	0.386*		0.7627*	0.7627*		2.232*	4.818*		1.515*		2.742*	4.641*
Maximum*	0.7024*	2.671*		-0.4128*	0.07448*		0.182*	0.8195*		0.6451*	1.977*		3.089*	4.076*		3.118*	4.659*		0.03673*	0.7245*		-0.4375*	0.06785*		-0.04141*	0.2951*		-0.158*	1.332*		-0.2367*	-0.2367*		-0.06199*	0.2508*		0.1422*	0.6021*		0.7627*	0.7627*		2.232*	4.818*		1.912*		2.742*	6.833*
Mean*	0.7024*	0.7024*		-0.4128*	-0.4128*		0.182*	0.182*		0.6451*	0.6451*		3.089*	3.089*		3.118*	3.118*		0.03673*	0.03673*		-0.4375*	-0.4375*		-0.04141*	-0.04141*		-0.158*	-0.158*		-0.2367*	-0.2367*		-0.06199*	-0.06199*		0.1422*	0.1422*		0.7627*	0.7627*		2.232*	2.232*		0.9535*		2.742*	2.742*
Std. Deviation*	0*	1.258*		0*	0.3627*		0*	0.3063*		0*	0.5452*		0*	0.7025*		0*	0.9152*		0*	0.4359*		0*	0.5362*		0*	0.1555*		0*	1.059*		0*	0*		0*	0.1796*		0*	0.3224*		0*	0*		0*	2.36*		0.5824*		0*	2.46*
Std. Error of Mean*	0*	0.4753*		0*	0.1282*		0*	0.09236*		0*	0.1724*		0*	0.2118*		0*	0.2759*		0*	0.1648*		0*	0.3096*		0*	0.04918*		0*	0.5293*		0*	0*		0*	0.05678*		0*	0.114*		0*	0*		0*	1.362*		0.1842*		0*	1.1*
Lower 95% CI of mean*		-0.4607*			-0.716*			-0.02379*			0.255*			2.617*			2.503*			-0.3664*			-1.769*			-0.1527*			-1.843*						-0.1904*			-0.1273*						-3.63*		0.5368*			-0.3131*
Upper 95% CI of mean*		1.865*			-0.1096*			0.3878*			1.035*			3.56*			3.732*			0.4399*			0.8944*			0.06983*			1.527*						0.06647*			0.4118*						8.094*		1.37*			5.797*
Coefficient of variation	0	179.05		0	87.86		0	168.31		0	84.52		0	22.74		0	29.35		0	1186.85		0	122.54		0	375.5		0	670.13		0	0		0	289.69		0	226.72		0	0		0	105.73		227.46			61.09
Fig. 6d
Fig. 6d left panel										Fig. 6d right panel
Illumina probe	gene	Monocyte count (R2=proportion of expression variance explained)	Monocyte count p.value	ML ratio (R2=proportion of expression variance explained)	ML ratio p.value	ML ratio effect size				gene	AFB	EUB	AFB	EUB
7040035	OAS1	0.0588126	0.0026744	0.125172	1.71126e-05	1.72371				MT2A	220.2	240.6	15.1	21.4
1090390	OAS1	0.0489272	0.00746869	0.0952303	0.000223742	1.6766				OAS1	95.9	158.6	239.3	265.3
7320561	OAS2	0.0172306	0.0639091	0.0778894	0.000630517	1.51487				OAS2	107.3	156.5	180.3	189.2
240722	OAS2	0.0373989	0.0106212	0.103384	7.32813e-05	1.13404				OAS3	102.5	137	162.9	168.7
1570156	OAS2	0.110699	3.55002e-05	0.19268	5.24451e-08	0.763166				ATF3	238.4	329	521.4	556.7
450615	MT2A	0.0279639	0.190025	0.0830541	0.00232521	1.488				CD80	58.3	49.1	6.8	6.8
										MMP7	10.6	12.2	0.9	1.3
1470465	DUSP16	0.00505245	0.0770499	0.0665253	0.000740222	0.283749				IFIT5	29.5	42.8	33.9	37.1
6590437	FCGR2A	0.0273974	0.0109676	0.0458312	0.00277673	1.01923				IFITM3	81.6	80.1	168.4	117.1
1230767	IFITM2	0.0523022	0.00867957	0.137165	1.28201e-05	1.80063				CTSH	103.5	122.6	150.3	160.8
5340433	PPARGC1B	0.0542596	0.00199026	0.0655894	0.000854323	-0.541759					monocytes + TLR1/TLR2 agonist		unstimulated monocytes
4900435	TNFSF13B	0.0427053	0.00811398	0.104077	7.8712e-05	0.761048
1710523	GRK5	-0.00384446	0.198469	0.0706479	0.000645809	0.254353
670369	CD8A	0.0175832	0.0475792	0.072389	0.000750894	-0.765667
3170128	CD8A	0.0269152	0.0267902	0.0870745	0.000284617	-0.884416
5220093	LRRFIP2	0.208533	3.00022e-08	0.157962	1.90799e-06	0.633
2000386	RNASEL	0.193062	5.77675e-07	0.195313	4.7885e-07	0.897896
4670458	KCNJ15	0.192287	6.91952e-07	0.148442	2.46541e-05	0.282424
6270020	CASP10	0.172416	6.95697e-07	0.155826	2.6476e-06	0.221258
20288	GLIPR2	0.160071	7.25768e-07	0.128303	8.88523e-06	0.56185
6900475	MSRB2	0.142815	2.19988e-06	0.214411	6.40122e-09	1.35929
2970201	NHSL2	0.177403	3.03808e-06	0.149334	2.95472e-05	0.409724
2570112	WWP2	0.150813	4.92857e-06	0.143555	8.76821e-06	0.268118
3370136	NLRC4	0.138997	5.13253e-06	0.128426	1.17295e-05	0.881953
1170647	SRA1	0.120108	1.10936e-05	0.125311	7.42173e-06	0.698173
610093	CARD6	0.214628	1.17741e-05	0.221057	6.74535e-06	0.507463
6580639	IL10RB	0.135382	1.28603e-05	0.139757	9.1166e-06	0.711733
2690369	FNTB	0.181373	1.80202e-05	0.214045	1.14774e-06	0.668339
1580524	GPX8	0.147655	1.9106e-05	0.118742	0.000187148	-0.183437
3930593	TJP2	0.112782	2.07229e-05	0.100239	5.39614e-05	0.687834
3440367	ACADVL	0.128673	2.33138e-05	0.109542	0.000102795	0.593615
4280561	ZNF438	0.12467	2.73554e-05	0.191485	1.29274e-07	0.811118
4570240	P2RY13	0.154249	3.07716e-05	0.169551	8.89901e-06	1.59191
3460356	DSC2	0.160285	3.11728e-05	0.105896	0.00239798	0.881738
3990433	DYNLT1	0.132301	3.23094e-05	0.124516	5.94505e-05	0.755023
5490433	TEKT2	0.116005	3.59301e-05	0.113072	4.50404e-05	0.17578
2900450	FOXK1	0.147502	4.21693e-05	0.166597	9.03662e-06	-0.63066
5550369	ARHGAP25	0.123235	4.44898e-05	0.0929093	0.000461352	0.988665
730010	TMEM140	0.136686	4.97338e-05	0.148076	2.01166e-05	1.19039
650753	ZNRD1	0.132321	5.10812e-05	0.133292	4.73188e-05	0.634331
3850435	C20orf11	0.163148	5.28349e-05	0.192146	4.81112e-06	-0.747049
450553	FAM129C	0.097575	6.3351e-05	0.130444	5.08499e-06	-0.209363
4880561	SLC31A2	0.128884	6.5418e-05	0.148624	1.37204e-05	0.984538
1940577	BAG3	0.128811	6.74024e-05	0.144148	2.00686e-05	0.625772
1260270	S100PBP	0.101856	7.04463e-05	0.0539981	0.00259057	0.19965
1500504	RUNX1	0.0945346	7.11577e-05	0.113993	1.61785e-05	0.623472
2070575	DNAJB12	0.104906	7.1374e-05	0.130279	1.00689e-05	0.54244
520544	TMEM150B	0.112693	7.50714e-05	0.158352	2.0791e-06	0.30336
1580465	NFE2	0.118656	7.66624e-05	0.106163	0.000201613	1.53846
3930392	ZNRD1	0.104629	7.71688e-05	0.142304	4.1506e-06	0.807611
3890484	PPM1E	0.105242	9.02659e-05	0.119046	3.11932e-05	0.17287
450300	GPR44	0.117007	0.000102773	0.0803632	0.0017272	-0.411962
130181	RAB35	0.0928802	0.000107317	0.110487	2.81044e-05	0.776808
4150270	LOC653034	0.0906714	0.000112323	0.0643658	0.000807448	0.179806
3440079	GPR177	0.101941	0.000124982	0.0858315	0.000426249	1.05575
2470327	MOBKL2C	0.108546	0.00013314	0.120637	5.223e-05	0.949104
2190341	NA	0.136001	0.000134047	0.0885915	0.00562781	-0.1561
4070014	BATF	0.111844	0.00013864	0.178976	6.69959e-07	0.79585
6510053	MTMR10	0.0897249	0.000142053	0.0457309	0.0038313	0.503522
1430047	FLOT1	0.0989661	0.00014248	0.141945	5.10121e-06	1.36615
3370066	C19orf59	0.0970978	0.000147537	0.121521	2.26207e-05	1.23311
1570358	ZBTB4	0.0911559	0.00015362	0.140496	3.4356e-06	-0.885547
1980750	ZFYVE26	0.083328	0.000163296	0.0500866	0.00194673	0.588493
160494	CEPT1	0.0870307	0.000168747	0.0180359	0.0298893	0.093619
2690639	RHBDD1	0.0928874	0.000172755	0.133823	7.39997e-06	0.424354
2100576	CCND2	0.105651	0.000173433	0.165907	1.51203e-06	-1.38721
2750653	LPP	0.166028	0.000203229	0.143783	0.00126575	-0.765013
1430136	UPF3A	0.155263	0.000210645	0.175444	4.01302e-05	-0.617506
4880132	ANKFY1	0.0901948	0.000227613	0.102212	9.12218e-05	0.936597
3850148	1997-02-28	0.100229	0.000234459	0.095922	0.000326127	0.922386
6350706	M6PRBP1	0.0829284	0.000236246	0.128213	7.43912e-06	0.808551
1440634	HEATR5A	0.0868691	0.000259168	0.119285	2.17928e-05	0.233712
7650747	EFNA4	0.0801953	0.000262616	0.0760281	0.000358992	0.368134
870324	C11orf75	0.111412	0.000283373	0.182821	9.49812e-07	0.866779
2140605	FANCL	0.0897912	0.000288643	0.119119	3.05325e-05	0.334044
1300192	CDC42EP2	0.144898	0.000307912	0.115289	0.00333732	0.95717
940736	MAP4K5	0.10883	0.000321776	0.120949	0.000125217	-0.504041
2320647	NSF	0.0911394	0.000332909	0.138785	8.37911e-06	0.585738
3780753	RFWD3	0.0802979	0.000336185	0.0689318	0.000789197	0.443622
4560110	ATP6V1E1	0.0753591	0.000346276	0.0961544	7.23721e-05	1.22309
7000609	RAD23B	0.0889603	0.00038206	0.0916613	0.000311079	-0.734645
940164	FBXL20	0.168416	0.000395846	0.202823	2.18106e-05	0.432967
1570523	STX3	0.121901	0.00040474	0.116587	0.000615374	0.547843
3520427	IP6K2	0.0966481	0.000407272	0.119956	6.73462e-05	0.443804
1570484	C19orf21	0.0805718	0.000413482	0.0700395	0.000913514	0.172131
620168	DUSP12	0.0955244	0.00042908	0.152569	4.99742e-06	-0.703423
5560131	HPS6	0.0974647	0.000447999	0.0827899	0.00138044	0.761867
5090561	MON1B	0.107042	0.000453386	0.0808898	0.00343672	0.311761
1660736	ZNRD1	0.0724264	0.000462176	0.0579808	0.00135869	0.499026
6860543	TTC9C	0.135885	0.000470673	0.170928	2.74028e-05	0.465638
6330279	CD69	0.0706534	0.000478287	0.123165	8.91327e-06	-0.266546
3420195	PTPLAD1	0.0791744	0.000484279	0.0804362	0.000440319	-0.4929
1470762	FRAT2	0.108462	0.000486013	0.0965589	0.00122589	0.96815
5270564	PELO	0.0977133	0.000486668	0.0746905	0.00284702	0.694431
1300722	PSENEN	0.0748199	0.000503176	0.0987949	8.23216e-05	0.488997
670403	C8orf41	0.120862	0.000510205	0.12488	0.000371322	0.608554
4280088	C6orf47	0.0752449	0.000518509	0.0980194	9.28237e-05	0.8067
1340075	TIPARP	0.174597	0.000519835	0.181272	0.000296128	0.833049
380373	LILRB3	0.0862522	0.000527558	0.126017	2.48237e-05	0.789472
5080333	C6orf57	0.0942705	0.000528995	0.117535	8.78866e-05	0.290705
6220195	TATDN1	0.0827508	0.00053495	0.0707791	0.00132287	-0.522517
4730059	TERF2IP	0.0685646	0.000544359	0.0718939	0.000424541	0.58692
5220347	TSTD2	0.0678829	0.000555378	0.061873	0.000869092	0.155534
1340037	ZNF20	0.124378	0.000575168	0.104642	0.00274747	0.287263
5420600	LOC402066	0.0824017	0.000578362	0.065392	0.00209357	0.117153
6330471	PARP14	0.0732906	0.000611631	0.129538	8.37737e-06	1.27188
2630743	TLR8	0.0961832	0.000616187	0.11558	0.000137495	0.996208
2940541	TMEM41A	0.0891608	0.000618988	0.0696148	0.00274713	0.215069
3060682	AFF3	0.0836214	0.000621279	0.199553	6.43067e-08	-0.536406
4890598	LOC113386	0.0809434	0.000626316	0.0711259	0.00131596	0.754666
4480008	KLB	0.0983275	0.000626399	0.080204	0.00253027	0.128485
2120341	GLIPR1	0.0827425	0.000648508	0.0883703	0.000422864	0.62127
50487	MLYCD	0.106217	0.000649548	0.083975	0.00366045	0.244358
1440612	NGRN	0.0730889	0.00065388	0.0956662	0.000118931	0.600813
7210300	COPB2	0.1058	0.000693386	0.118629	0.000254545	0.544563
7100280	ARHGAP26	0.0988398	0.000698069	0.121147	0.000123366	0.379719
3360370	GIMAP6	0.093974	0.000720146	0.128945	4.77771e-05	1.13981
5490379	TIRAP	0.13065	0.000724824	0.153717	0.000112926	0.134118
1740767	NCF4	0.0971818	0.00072608	0.0892572	0.00133793	0.825419
3310228	TRAF3IP2	0.091021	0.000727603	0.118155	8.96851e-05	0.577305
4900747	MRPL49	0.0913838	0.000736066	0.0895369	0.000848087	0.28399
3180553	C17orf87	0.0924172	0.000745341	0.146274	1.11975e-05	1.12377
580014	AQP9	0.0655825	0.000753205	0.0894136	0.000126116	1.33223
3310639	GIMAP4	0.114288	0.000754062	0.124178	0.000345643	1.17706
6110538	C19orf2	0.0669345	0.000757303	0.0974524	7.62212e-05	-0.704487
2650348	MN1	0.0953606	0.000765145	0.09526	0.000771104	-0.214698
6520497	GPR177	0.0937537	0.000769678	0.0807827	0.00208578	0.404278
4540072	ABHD2	0.097146	0.000810723	0.144146	2.0522e-05	0.441767
1430678	CD68	0.0669379	0.000819869	0.0758167	0.000421595	1.72027
4060632	ZNF653	0.0675134	0.000825907	0.0949511	0.0001047	0.428881
5890678	ARCN1	0.0862026	0.000826955	0.104357	0.000205659	0.870502
5290161	AQR	0.0632096	0.000833587	0.0495055	0.0023115	0.443819
2600040	C14orf133	0.0614813	0.000847555	0.0800864	0.000211364	0.41847
4220364	LOC728969	0.0779736	0.000847967	0.105094	0.000107526	0.562801
5670341	TLR8	0.0675521	0.000849898	0.0731795	0.000557457	1.2896
6290253	SELL	0.0924964	0.000862732	0.104981	0.000329419	1.44405
1070367	MARCKSL1	0.0965259	0.000865964	0.0809049	0.0028923	-0.73815
2030044	LMNB1	0.0729636	0.000872529	0.109134	5.59648e-05	1.33787
3420435	TBC1D9B	0.0750564	0.000876776	0.0857305	0.000391048	-0.51025
4150332	SLC2A1	0.0614334	0.000882004	0.0877825	0.000122877	-0.235937
2690215	ZNF2	0.114934	0.000898154	0.125205	0.000398693	0.219653
670594	C1orf77	0.0895459	0.000908976	0.11034	0.000183148	0.67686
1400601	HCP5	0.0904183	0.000921879	0.0762534	0.00273403	1.15055
1500343	KIAA0564	0.0788174	0.000933308	0.0650073	0.00265835	-0.24182
7400689	ACSL3	0.127685	0.000934237	0.148206	0.000179289	0.239587
4760537	SH3GLB1	0.0617443	0.000938935	0.107929	2.90124e-05	0.506987
5220438	VWA5A	0.0723371	0.000940382	0.0994292	0.000120809	0.181226
3460278	EMILIN2	0.0663327	0.000950099	0.134627	5.20604e-06	1.08481
50164	STX5	0.0621803	0.000964846	0.0891633	0.000127747	0.698844
5810632	MAD2L1BP	0.0653248	0.000979663	0.0721197	0.000588958	0.691433
3940152	DERPC	0.0592762	0.000995561	0.123439	7.80563e-06	0.470586
650021	STRADA	0.0630245	0.00104028	0.0588146	0.00142445	0.63709
3420692	C1orf144	0.0716285	0.00104725	0.0982843	0.000139043	0.642352
2940725	RICS	0.0697739	0.00105141	0.104613	7.50814e-05	-0.416338
5900544	TAF4B	0.061828	0.00105857	0.0552394	0.00173012	-0.204752
2000564	LOC100128126	0.0936323	0.00106292	0.0796354	0.00313023	-0.518023
2230010	TUBGCP6	0.0776007	0.00106914	0.074925	0.00130978	-0.225403
4150279	SPTLC2	0.0594459	0.00107111	0.0783121	0.000261949	0.686414
2570068	SASS6	0.0917527	0.0010789	0.0779033	0.00313509	0.275329
1660608	ADPRHL2	0.0756394	0.00109996	0.115154	5.37994e-05	0.815155
4590646	FAM193B	0.070088	0.00112043	0.099388	0.000121875	0.580124
770692	WDR33	0.0641824	0.00116015	0.0876435	0.000198952	-0.230629
5720131	NUP98	0.0718678	0.00116236	0.0853795	0.000418334	0.246996
240424	ERP27	0.0865593	0.00118357	0.0784908	0.00219739	-0.329145
1340411	DCP2	0.0709011	0.00119323	0.0892133	0.000298649	-0.899734
2030170	PHF21A	0.0719636	0.0012028	0.0576798	0.00353604	0.43726
3930368	B9D2	0.0567406	0.00121398	0.0775323	0.000257657	0.727744
450047	FCGBP	0.113328	0.00123232	0.13024	0.00032246	-1.73962
2630445	DBNL	0.05997	0.00125345	0.0921288	0.000112289	0.562585
3850021	SCO1	0.100688	0.00125642	0.153437	1.95395e-05	0.633247
2340041	MAEA	0.0561174	0.00128186	0.0726088	0.00037532	0.460328
6960209	MRPL1	0.0584707	0.00128285	0.0548715	0.00167729	-0.733224
1690180	BUD13	0.107099	0.00129469	0.108517	0.00115823	0.363767
2900377	VGLL4	0.0603605	0.00130064	0.093156	0.000110835	0.490271
770630	YRDC	0.136015	0.00130702	0.158551	0.000208218	-1.6723
650564	TRADD	0.058972	0.00131358	0.0816276	0.000241187	0.590852
4390612	MED8	0.0577143	0.00132538	0.0837729	0.000188857	0.637801
1850468	IP6K2	0.105624	0.00133551	0.11936	0.000453652	0.323963
3130224	RXRB	0.0560612	0.00133768	0.0634856	0.000769892	0.698586
620717	IP6K1	0.0704032	0.00133936	0.0582889	0.00334198	0.136025
6450397	PSEN1	0.0641399	0.00134123	0.0633562	0.00142243	0.556458
1570348	STAM2	0.0707896	0.00137275	0.0710656	0.00134441	0.324503
3460520	FCF1	0.0729995	0.0013886	0.071146	0.00159789	0.173533
5490403	TMEM39A	0.121689	0.00140602	0.139291	0.00034298	0.224082
4210619	C17orf91	0.103639	0.00141003	0.116888	0.000498561	-0.972363
2490066	SOS2	0.0768571	0.00141421	0.113427	8.59829e-05	0.239738
3120091	MFAP1	0.145202	0.00143295	0.133971	0.00360559	0.613015
1580411	GIMAP5	0.115627	0.00143987	0.122052	0.000864028	1.21806
1780600	GFOD2	0.0638842	0.00144073	0.108184	5.04426e-05	0.301933
6220382	SOLH	0.0702476	0.00144132	0.0655709	0.00205208	-0.297463
6900634	LOC643304	0.0782425	0.00145433	0.0742679	0.00196883	0.145321
2710575	FAM53B	0.0911998	0.00147555	0.115479	0.000224282	-0.978226
1780440	LOC653276	0.0595756	0.00148894	0.162859	5.27792e-07	0.452083
4210465	PHF17	0.0745243	0.00149007	0.0654289	0.00297247	-0.363359
670369	BRSK1	0.0924348	0.00149781	0.115379	0.000251963	1.125
3170128	SEC14L1	0.0910593	0.00150446	0.0901208	0.0016177	0.436619
4560743	DNAJC5	0.0542216	0.00152003	0.0885816	0.000116606	0.480923
6960630	TLR4	0.087463	0.0015316	0.0820201	0.00232931	0.661898
4150670	HGSNAT	0.0662711	0.00154113	0.0809464	0.000509545	0.166317
4200703	RAB1A	0.0788545	0.00155556	0.0922316	0.000559486	0.295727
6180253	NA	0.061172	0.00157009	0.0532221	0.00284785	-0.321707
2100411	NA	0.0557004	0.00159901	0.0730344	0.000438563	0.405234
620487	ACOT7	0.0647518	0.00160359	0.0574346	0.0027803	-0.200155
7610735	MAP7D3	0.061527	0.00160584	0.0570767	0.00224162	-0.198063
4830487	CD300C	0.0651845	0.00160743	0.0677404	0.00132614	1.19221
1440630	NA	0.0623005	0.00167359	0.0607915	0.0018743	0.154499
5340553	SDF2	0.0936303	0.00169748	0.135866	6.23109e-05	0.527879
2640050	MOBKL2A	0.0564657	0.00170042	0.0783356	0.000331244	0.971012
4260762	SDHAF2	0.0530008	0.00172117	0.0857913	0.000148651	0.956798
4210059	FKBP14	0.119494	0.0017261	0.140668	0.000316096	-1.96069
2030162	BLZF1	0.129523	0.00174845	0.128156	0.00195302	-0.988937
5690753	FLCN	0.0670885	0.00175964	0.0618113	0.00262085	0.123639
2970685	UBL5	0.0769288	0.00176575	0.0986831	0.000334411	0.692438
2360348	AMACR	0.055293	0.00177223	0.0899713	0.000131852	0.202453
2140239	CHMP2A	0.054972	0.00177409	0.0911382	0.000118064	0.830657
5080601	SETD4	0.081426	0.00178667	0.106479	0.000260085	0.197775
20707	SNX20	0.0661888	0.00180498	0.118946	3.24312e-05	0.639195
4150500	TINF2	0.0542929	0.00183648	0.0847083	0.000188755	0.849648
50397	ARL15	0.105774	0.00183892	0.109633	0.00135663	0.185793
3390022	STK38	0.0784426	0.00185743	0.0713374	0.0031984	0.569338
4490259	COMMD5	0.0802389	0.00188741	0.0993727	0.000434304	0.60089
6380121	AVL9	0.0529157	0.00195687	0.0702601	0.000536798	0.222057
2680458	LOC123688	0.0859542	0.00197109	0.113027	0.000242403	-0.371345
730577	GGCT	0.0623482	0.00197295	0.0767846	0.00066522	-0.566782
7040014	CYBA	0.0520702	0.0019968	0.0823851	0.000207508	0.676437
3140047	ARHGAP30	0.0506548	0.00200781	0.0774879	0.000271759	1.11306
780762	GOSR2	0.0529071	0.00200911	0.0794383	0.00027684	0.335299
6250100	LOC255783	0.0499314	0.00201592	0.0547461	0.00140978	0.757311
6100255	PCBD2	0.118467	0.00202076	0.111777	0.00345258	-0.142581
3890017	ITFG2	0.0805206	0.00202807	0.117024	0.000121431	-0.413322
70601	DPP7	0.0555721	0.00203068	0.105446	4.74332e-05	0.97819
1500021	GNA12	0.0498531	0.00206208	0.0466003	0.00262577	-0.37076
3890400	ZNFX1	0.0708518	0.00207351	0.0682265	0.00253122	0.609134
3180500	PLD3	0.0499979	0.00211696	0.0484529	0.00237457	0.213382
1010048	ACVR1B	0.0593901	0.00212441	0.071719	0.00084143	0.611643
4070392	VAPA	0.0537229	0.00224009	0.0791348	0.00033442	-0.416642
1070463	FBXO6	0.059336	0.00225049	0.126944	1.31215e-05	1.19527
2140671	ARHGAP30	0.0539995	0.00225672	0.0772261	0.00039674	1.15272
7050458	UQCRQ	0.0539159	0.00230782	0.0793848	0.000342711	0.606357
6960349	UBTD2	0.0785796	0.00231561	0.13819	2.2766e-05	0.272087
5550204	HMGN1	0.0531224	0.0023177	0.100961	6.35638e-05	-0.996576
7330519	C17orf80	0.0800027	0.002324	0.09143	0.000965327	0.244081
430577	TTC3	0.0561681	0.00235845	0.125497	1.22248e-05	-0.828347
6510735	PITPNB	0.0571065	0.00236462	0.0569505	0.00239245	0.275628
4920040	ACTR1A	0.0493461	0.00237619	0.0572889	0.00131586	0.709844
3870450	RBBP7	0.0569753	0.00237693	0.0770348	0.000527026	-0.864499
580433	TSPO	0.0725264	0.00241549	0.0799281	0.00137338	0.418498
4860240	EDARADD	0.049699	0.00244286	0.0508596	0.00224063	0.177119
4390576	ZAK	0.0471442	0.00244616	0.0618667	0.000819268	0.368267
1660195	TARDBP	0.106949	0.00246041	0.128405	0.000448293	-0.400924
5550553	LNPEP	0.0492977	0.00250708	0.102395	4.66797e-05	0.38936
1340619	SNORA25	0.0623402	0.00253801	0.094129	0.000228639	-0.358096
3780326	SNX20	0.079348	0.00255069	0.104168	0.00037693	0.251612
2900722	PHAX	0.0808645	0.00255482	0.0893955	0.00132414	-0.567322
4040703	EFNA4	0.063426	0.00260607	0.10905	8.11086e-05	0.256437
1240047	FGD3	0.067086	0.00261731	0.0791996	0.00104317	0.678539
1500446	GIMAP8	0.120694	0.0026841	0.1223	0.00235827	1.23939
4280482	GPR1	0.11065	0.00268825	0.112892	0.00224844	-1.29423
5900201	PACSIN2	0.0566351	0.00271905	0.120306	2.16652e-05	0.563002
2710400	POLD3	0.0618352	0.00271953	0.113366	5.39765e-05	0.484068
5310377	BTBD12	0.046369	0.00273534	0.0430678	0.00349618	0.302637
6840598	CCDC56	0.0465871	0.00278412	0.080352	0.000224566	0.653019
460280	ABHD2	0.0548912	0.00279015	0.0872209	0.000245329	0.298101
6350634	MRPS30	0.0516819	0.00279599	0.0514761	0.00283935	-0.39805
2100743	CSNK1D	0.0653932	0.00280132	0.0946359	0.000303375	0.768092
3840437	S100A11	0.0668222	0.00281411	0.0666947	0.0028415	0.526705
4490520	SKP2	0.0608702	0.00283188	0.062753	0.00245661	-0.359626
3710273	NA	0.0855204	0.0028572	0.0859058	0.00277307	-0.578363
1780278	NA	0.0701479	0.00286204	0.128443	3.22835e-05	0.177199
620161	SFRS18	0.0486262	0.00286624	0.0612718	0.0011165	-0.857844
6520079	RPRC1	0.0517402	0.00286942	0.0947017	0.00011377	0.756872
1780619	GTF2E2	0.0456051	0.00293279	0.0428649	0.00359563	0.524429
4540632	ROPN1L	0.0602238	0.00297518	0.0827642	0.000541597	0.230235
4290446	TREML2	0.0513259	0.00298319	0.0516331	0.00291541	0.147641
4210129	TMEM18	0.0450761	0.00298739	0.0613255	0.000892691	-0.285872
1190142	LOC144438	0.0531999	0.00299759	0.111306	3.71551e-05	-0.527133
7570068	FAM129B	0.0668034	0.00306298	0.0743569	0.00172428	0.830864
6330195	TLR5	0.0669134	0.00306912	0.0716407	0.00214198	0.629384
2630241	MTCP1	0.0720149	0.00307526	0.0818637	0.00144764	-0.556709
2070138	PIAS4	0.0535368	0.00310094	0.0733765	0.000699459	0.509732
5670717	VPS72	0.0544624	0.00312319	0.0698777	0.000981126	0.466322
940639	ADAMTSL5	0.101463	0.00316311	0.112721	0.0012991	0.15339
6370435	CMPK2	0.0609743	0.00317597	0.137097	9.28882e-06	0.60667
6370768	GPR141	0.087011	0.00321395	0.14482	3.44815e-05	0.237373
3420564	RBCK1	0.0478827	0.00321961	0.107539	3.62451e-05	0.694763
3610148	CSNK1E	0.0436934	0.00322001	0.101563	4.23589e-05	-0.423849
7330196	HAVCR2	0.0626145	0.00325427	0.0745745	0.00131445	0.543126
2760692	ARMCX3	0.0999749	0.00330515	0.111197	0.00136251	0.44308
4220431	CRK	0.0767433	0.00331438	0.122191	9.86046e-05	0.374914
5270520	PRRT2	0.0736052	0.00335	0.0848467	0.00141399	-0.254457
1850546	NA	0.0456485	0.0033804	0.0461656	0.00325264	0.124551
5700561	TMBIM6	0.0565843	0.00338788	0.0806738	0.000550693	0.580202
4610577	LOC387882	0.053535	0.00339552	0.129059	1.08723e-05	-0.293893
3180053	DENND1A	0.0477168	0.00340384	0.0603851	0.0013219	-0.374229
5870274	EXOC6	0.0638989	0.00341613	0.0964649	0.000286538	0.385993
3520324	STMN1	0.0456652	0.00344995	0.054571	0.00177673	-0.176685
3170195	OASL	0.064028	0.00345327	0.120607	4.55149e-05	0.7688
3780440	NEU1	0.0499923	0.00349876	0.0683144	0.000887198	0.56173
6380079	SFRS2IP	0.0524665	0.00349944	0.056567	0.00257219	0.557696
6510487	NA	0.0952133	0.00350255	0.110846	0.00102472	-0.649979
6760110	MICB	0.0662461	0.00354875	0.106687	0.000161301	0.988187
1190246	LRRK2	0.0486182	0.00355411	0.114382	2.48584e-05	0.27888
4900240	MAX	0.068319	0.00355881	0.126589	4.02314e-05	0.454725
3800398	CD1E	0.0771743	0.00357476	0.111991	0.000242558	-0.508489
5560661	GRN	0.0441206	0.00363151	0.105128	3.73671e-05	0.791175
60307	HK1	0.0514567	0.00367557	0.120629	1.94329e-05	0.511084
130609	TFRC	0.107662	0.0036767	0.163949	3.99203e-05	-1.04451
6180228	APEX1	0.0649338	0.00372267	0.0770508	0.00147984	-0.689482
3780193	PGM1	0.0417216	0.00372428	0.0532643	0.00157993	0.626186
1110553	DSC2	0.047014	0.00372828	0.0542098	0.00217789	0.263025
6510707	PHRF1	0.0455315	0.00374462	0.0561561	0.00169521	0.819168
5270619	C5orf22	0.0719278	0.00374824	0.085992	0.0012742	0.248146
10504	SEPX1	0.0541181	0.00375171	0.0925101	0.000207001	0.878216
6660475	RPIA	0.0462654	0.00375623	0.0616248	0.0011933	-0.599246
4150753	NAE1	0.0603772	0.00380074	0.0706177	0.0017491	-0.345916
2100750	RUNDC2C	0.126188	0.00381591	0.131378	0.00249959	-0.436183
3710564	CHTF8	0.0424203	0.00384569	0.0689074	0.000535444	0.386199
7510551	TBC1D2	0.0523982	0.00385753	0.0594196	0.00227551	0.838345
2850553	LMOD3	0.125226	0.00386914	0.128719	0.00291125	-1.353
6560392	GLUL	0.0407406	0.00388151	0.0517164	0.00171802	0.292635
5420400	SPRYD3	0.043453	0.00388878	0.0800174	0.000253966	0.774534
3780181	BAT2	0.0469745	0.00390642	0.0478255	0.00366551	-0.507495
150551	GZF1	0.0870296	0.00397921	0.0915926	0.00278662	-0.246384
5820240	XPO7	0.0408028	0.00398407	0.0441387	0.00310922	0.360159
2760079	CCDC125	0.0998658	0.00400444	0.121327	0.000731678	-1.46224
6860544	ITGAX	0.0690057	0.00404035	0.0884285	0.000913082	-0.386543
7330026	DNA2	0.0449312	0.00407768	0.0814537	0.000265613	0.163468
7330619	CD69	0.0696337	0.00410812	0.0873073	0.00106027	-0.699721
2940059	SNORD73A	0.0491931	0.00412179	0.0624878	0.00152102	-0.187336
160270	FTSJD2	0.0464638	0.00413153	0.0821024	0.000286258	0.51968
6290608	ARMC8	0.0719484	0.00413298	0.159944	4.30033e-06	0.196026
7550328	ZNF69	0.0903094	0.00426805	0.104471	0.00140587	-2.06384
7210767	ZNF598	0.040574	0.00426823	0.0552498	0.0014334	-0.306569
20544	NDST2	0.0414098	0.00428754	0.0596111	0.00110637	0.579295
2370576	ITGB2	0.0543996	0.00439095	0.0629991	0.00229434	0.309209
3840750	PINX1	0.0473419	0.00442126	0.0528169	0.00293317	0.142107
4490687	GDPD1	0.0799716	0.00445597	0.0936583	0.0015409	-0.300805
1980524	ALCAM	0.0447577	0.00475393	0.110476	3.36091e-05	-0.966275
1010360	SS18	0.0675892	0.00476331	0.0744192	0.0028217	1.06418
1740382	C1orf210	0.0617041	0.00476866	0.0747966	0.00175946	0.650179
4730670	BCL10	0.0382512	0.00487911	0.0552443	0.00137993	0.156055
4780403	ATE1	0.073533	0.00495109	0.119362	0.000142608	0.189499
2970050	MTX3	0.0398888	0.00495369	0.114584	1.8043e-05	-0.194886
620187	HSPD1	0.0494298	0.00496416	0.109881	5.12303e-05	0.227793
4810093	C22orf40	0.0407782	0.00496909	0.058434	0.00133274	0.149058
4880626	HINFP	0.066307	0.00499651	0.0771906	0.00217085	0.387026
5360079	PLSCR3	0.0524333	0.00500137	0.0827078	0.000508508	0.821312
6330615	APOL3	0.0486803	0.00500929	0.101363	9.39647e-05	1.41773
1190040	CLK3	0.0459684	0.00502187	0.076537	0.000507176	0.543216
2030376	TMEM115	0.0462776	0.00504696	0.0594312	0.00188211	0.468291
6220746	CDKN2B	0.0664844	0.0050728	0.0866602	0.00108126	0.191829
830278	CTNNA1	0.055698	0.00507734	0.0676652	0.00205089	0.644796
130392	DDX60L	0.0519489	0.00510734	0.0750754	0.000891975	0.795774
4280273	HSPA4	0.112503	0.0051535	0.186459	1.24487e-05	0.317922
3840400	TCF3	0.0399961	0.0051639	0.0587661	0.00127503	-0.346102
670082	STAC3	0.0414672	0.0051805	0.0597243	0.0013261	0.224898
2600059	IL8RB	0.0525484	0.00524607	0.0669851	0.00176312	0.523403
2600288	PSMB8	0.0394749	0.00524695	0.0742468	0.000392502	1.31313
5560079	SNRPB	0.0397847	0.00527016	0.0792778	0.000276457	0.949004
3870386	NDUFAF1	0.0748238	0.00540283	0.0987193	0.000850213	0.527231
5050647	NFATC3	0.0831901	0.00559986	0.109478	0.000717885	-0.194614
6940280	HECTD3	0.038189	0.00561245	0.0661515	0.000699093	0.39871
6220075	DRAM1	0.0855755	0.00562377	0.0923418	0.00330868	0.580581
940519	TRIM33	0.059774	0.00567837	0.076	0.0016491	0.272972
4890241	SNORD36C	0.0787476	0.0057159	0.114924	0.000341845	-0.5624
5490768	LOC552889	0.0475961	0.00571822	0.0555369	0.0031451	0.481117
5290148	CAMSAP1	0.0933337	0.00572226	0.110831	0.00143558	-0.324353
4730138	CPXM1	0.0404258	0.00587346	0.0928783	0.000115256	0.175487
6370682	RALB	0.0408659	0.00590321	0.0622597	0.00119309	0.980337
1710523	FLJ35801	0.0433869	0.00596125	0.0726371	0.000665322	0.262925
6840184	MOSC1	0.101767	0.0059863	0.119413	0.00146353	0.80709
3130347	POMT1	0.0478716	0.00601362	0.0793427	0.000561577	0.285396
1570538	SQRDL	0.0555475	0.00611176	0.0748808	0.00140775	0.470573
2850450	S100A6	0.0396824	0.00617566	0.0669177	0.000807324	0.469514
3420612	UBE2L3	0.0800478	0.0061828	0.163036	8.87147e-06	0.80004
2370010	HSPC268	0.0758807	0.00626364	0.0874443	0.00255108	-2.03013
780600	EXOC7	0.0403834	0.00628455	0.0750245	0.000470678	0.160844
5360129	ING2	0.0404002	0.0063012	0.0754997	0.000455902	-0.606554
150280	VAMP2	0.0570516	0.00630882	0.122207	4.30288e-05	-0.978574
6130674	C12orf32	0.0732292	0.00631093	0.0900467	0.00171598	-0.380192
1070358	TES	0.0586887	0.00645047	0.0997288	0.000280978	0.458799
6370519	IFI30	0.0695918	0.00645686	0.105013	0.000419134	0.944707
2450192	FSD1	0.0434461	0.00648869	0.0736013	0.000674678	0.157748
20692	MCRS1	0.0338557	0.0064899	0.043996	0.00305319	0.553723
2350678	C12orf43	0.0368939	0.00650481	0.0468411	0.00309706	-0.467622
4230097	RAI1	0.0399444	0.00661736	0.0646803	0.00104026	-0.402108
6220300	LCOR	0.034843	0.00664488	0.0623839	0.000855962	-1.13421
1820398	NDUFA8	0.0802505	0.00674936	0.137775	7.41167e-05	0.669817
6290246	PYCARD	0.0346563	0.00679009	0.0474612	0.00261688	0.698101
1780681	FAM96B	0.0369003	0.0068063	0.111259	2.54639e-05	0.798839
3850630	TGFBR3	0.0347476	0.00690627	0.107251	3.01267e-05	-0.386365
3850246	CLEC4E	0.03578	0.00690791	0.0601146	0.00112651	0.627342
780327	SMAD7	0.0337711	0.00697326	0.0426926	0.00358841	-0.486955
2940301	MMGT1	0.0344359	0.00704021	0.0634016	0.00081481	-0.787209
6200736	HINT3	0.132538	0.00710767	0.188495	6.74365e-05	0.29313
2140711	AMICA1	0.039514	0.00711146	0.0489303	0.00351167	0.566653
1240576	PEX11B	0.0435885	0.00716895	0.0604312	0.00202018	0.707451
4250577	MBOAT2	0.0549922	0.00717769	0.09438	0.000357628	-0.309893
2000300	JUND	0.0392178	0.00718498	0.0757516	0.000466078	-0.755143
520367	UBQLN1	0.055827	0.00720203	0.127302	3.0015e-05	0.41983
5670719	NA	0.0357793	0.00722583	0.0761594	0.0003548	0.160846
940356	USP14	0.0340649	0.00725338	0.0560528	0.00141113	-0.531851
6520523	FDXACB1	0.0509065	0.00725439	0.0631263	0.00287188	0.729123
2900327	PDIA6	0.0453032	0.00729358	0.0552551	0.00344333	0.831011
6960382	SP140	0.0360417	0.00738846	0.0973601	7.47019e-05	0.467446
6660315	NA	0.0738136	0.00750022	0.0918104	0.00185242	0.187987
6380575	MRPL27	0.0398413	0.00752998	0.0620524	0.00142511	0.725769
4860187	CBL	0.0343474	0.00758126	0.0843761	0.000180932	-1.32787
3370246	RAB31	0.0335262	0.00762505	0.144278	1.7226e-06	0.60407
6250594	WDR59	0.0683415	0.00763215	0.0789366	0.00336341	-0.289746
460719	SAMHD1	0.0335351	0.00763761	0.0592338	0.00112673	0.786
4670435	DRD3	0.0391278	0.00766658	0.0782045	0.000409873	0.1662
7560538	FAM118B	0.0598335	0.00777511	0.106213	0.000221863	0.379624
6550195	POLDIP3	0.0355128	0.00780031	0.0930712	0.000104826	0.368694
4220010	SPG21	0.0439873	0.00781376	0.0774023	0.000630651	0.889849
3890373	GSDM1	0.0567998	0.00781524	0.0722619	0.00239916	2.00317
4610070	PPID	0.0616687	0.00782355	0.0762954	0.00254486	1.82287
620280	BLOC1S2	0.0325571	0.00784522	0.0463374	0.00281075	0.144918
1410411	SLC30A3	0.0409986	0.0080307	0.0518783	0.0035432	0.12662
1050215	LOC100130522	0.0426172	0.00805321	0.0546182	0.00326121	0.129069
2760008	ZNF398	0.0342877	0.00806115	0.0589305	0.00128257	-0.369284
6660047	TMEM93	0.0383748	0.00807292	0.0548579	0.00234684	0.272593
6650634	2000-08-31	0.0562063	0.00810381	0.158141	3.00596e-06	0.558007
4850414	EVI2B	0.0371611	0.00817743	0.051382	0.00281873	-0.682617
4560154	FGR	0.0469205	0.00820484	0.0631952	0.00239549	0.388388
1050082	WDR1	0.0317872	0.00822198	0.0498375	0.00214441	1.17739
1580338	PEX11G	0.0331649	0.00824484	0.0630268	0.000890441	0.321702
1850079	FLJ21986	0.0905474	0.00825576	0.104509	0.00272852	-0.855907
7560037	MT1F	0.06479	0.00826121	0.105314	0.000363149	0.800846
130048	NGRN	0.0786657	0.00829423	0.0936861	0.00255953	0.529212
50242	C11orf63	0.0774832	0.00835284	0.0969574	0.00182338	-0.593383
5550292	RHBDD1	0.0917409	0.00839655	0.108555	0.00220955	0.282592
1430711	LOC646675	0.0311347	0.00846682	0.0527952	0.00168899	0.397312
7040142	PDE8B	0.0336765	0.00855074	0.0858849	0.000172656	-0.299844
770128	TRIM27	0.0884647	0.00857561	0.137162	0.000180914	0.45733
5910164	POLE4	0.032005	0.00859972	0.0760617	0.000322186	0.46382
620300	ACSL3	0.0991944	0.00861697	0.151799	0.0001265	0.536835
460259	AIM2	0.0860155	0.00865984	0.135892	0.000167982	1.22116
2810246	ACADVL	0.039723	0.00866245	0.051497	0.00357335	0.693204
6760364	GCLC	0.0318898	0.00867195	0.0481273	0.0025846	-0.646
7150554	SPTLC1	0.0755683	0.00871304	0.112513	0.000487556	0.374899
2760441	MX2	0.0313627	0.0087178	0.0947246	7.65719e-05	1.40539
5260414	2007-08-31	0.032446	0.00880727	0.0658333	0.000730771	-0.52627
2230091	LRG1	0.0382479	0.00881404	0.126116	1.13576e-05	0.793258
2470017	ARHGEF1	0.0309008	0.00885499	0.0984971	5.65214e-05	-0.869472
3940097	CDC42BPB	0.0369652	0.00892493	0.0622864	0.00133863	-0.404375
3420593	SLC12A2	0.0302398	0.0090097	0.0580097	0.00114098	-0.290657
1850561	NA	0.0786375	0.00905254	0.116337	0.00047205	0.124003
2690544	SV2B	0.0331408	0.00905327	0.0485665	0.00285931	0.129993
380497	LOC642960	0.0299848	0.00908411	0.0647183	0.000685352	0.148724
2850332	DEM1	0.0732404	0.00920843	0.0931138	0.00195716	-1.60024
7210735	PLAC8	0.0536726	0.00922302	0.112773	0.000100309	1.48643
6220600	CD86	0.084035	0.0092458	0.0956989	0.00368181	0.567522
1400717	DNAJC13	0.0697022	0.00942651	0.0875	0.00236551	0.509973
6660041	SRRM2	0.0923978	0.00949707	0.135359	0.000310335	-0.660798
4150167	CXorf40A	0.0336168	0.00950546	0.0586319	0.00146529	0.175079
1300369	SEC23B	0.0630443	0.00953556	0.0932769	0.000927319	0.467917
1780678	GRIPAP1	0.0873235	0.00954845	0.099447	0.00365229	-1.58634
5810743	METTL13	0.0574009	0.0095878	0.0876303	0.000945538	0.571745
650056	LENG1	0.0609494	0.00962368	0.114382	0.000156675	0.222106
3610475	ADAR	0.0358229	0.00969429	0.0912418	0.000151252	1.11821
510519	LHPP	0.0356691	0.00975173	0.0698825	0.000751262	0.936332
5130037	ITCH	0.0494306	0.00979981	0.0996824	0.00021389	-0.518535
7000338	SLC11A2	0.0948728	0.0098279	0.150083	0.000118487	-0.500901
1300577	SYNCRIP	0.0505937	0.00985443	0.0672837	0.00276271	-0.496287
2060703	UBQLN1	0.063419	0.00987928	0.0926574	0.00103496	0.446096
1770470	HPCAL1	0.0287098	0.00988112	0.0496687	0.00207573	0.352662
1980600	ZMAT2	0.032617	0.00989651	0.0544718	0.00193232	0.599689
940446	TRIM21	0.118314	0.00990629	0.177662	7.51606e-05	0.936743
2690747	RRBP1	0.0349697	0.00992684	0.0702338	0.000707653	0.52186
4060431	ZFP112	0.0382268	0.0100057	0.0710662	0.000848013	0.126519
2070338	STX2	0.029285	0.0100156	0.0706381	0.000460256	-0.574433
4590369	MAPK14	0.0376089	0.010084	0.0955562	0.000128578	0.654166
4540017	BANP	0.0390932	0.0101405	0.060242	0.00206346	0.749661
6350711	RAB40B	0.0654415	0.0101712	0.102954	0.000558291	-0.282556
6660162	ERGIC1	0.0493265	0.0102346	0.0693033	0.00223722	0.455765
6450022	CASP4	0.070634	0.0103283	0.167458	5.02961e-06	0.63037
7050619	SLC12A8	0.0819539	0.010374	0.0981851	0.00288363	0.116824
1820725	GCH1	0.0715591	0.0103865	0.128001	0.000126723	0.327126
160255	RPL36AL	0.0391479	0.0104102	0.0681076	0.00117666	0.60885
3850445	MED8	0.0281281	0.0104148	0.0463376	0.00268206	0.650743
1300136	PSMB8	0.0298353	0.010468	0.073203	0.000412217	1.01353
620008	NA	0.0402894	0.0105068	0.107183	6.66414e-05	0.317316
460193	NELF	0.0468058	0.0105129	0.0610762	0.00355271	-0.581381
2340671	MRPL17	0.0558401	0.0105871	0.0813961	0.00149314	0.603987
940612	SPRED1	0.0619852	0.0106325	0.0997974	0.000575251	-0.759867
1770386	C11orf60	0.079227	0.0106551	0.118322	0.000493281	0.160553
2690475	KIAA1949	0.0620666	0.0106796	0.0803365	0.00260492	0.599753
5270682	SLC2A6	0.0316992	0.0107073	0.055599	0.00179336	0.780184
2230187	ITSN1	0.0550698	0.0107173	0.0913384	0.000666553	0.598734
110639	SPAG9	0.0337418	0.0107579	0.0565915	0.00194135	-0.555253
5130767	SLC27A3	0.034254	0.0107674	0.0672172	0.000910687	0.781051
3140156	STIP1	0.0712927	0.010803	0.114173	0.000381736	0.795923
6770242	BEST1	0.028816	0.0108512	0.0778129	0.000280873	0.368894
4260497	PPFIA1	0.0401255	0.0108813	0.0892364	0.000267366	0.317136
4560019	RABL4	0.0293181	0.0108903	0.0535822	0.00178201	0.493089
2600553	CDC37	0.0276937	0.0110026	0.0426279	0.00361154	0.600748
430523	ZC3H3	0.0784397	0.0110702	0.0934388	0.00340031	0.432373
3060619	S1PR1	0.0752617	0.0110824	0.135883	9.50306e-05	-0.278671
6520408	PRIC285	0.0585481	0.01121	0.111663	0.000187492	1.39495
2510463	PIK3CG	0.0332268	0.0112401	0.0617029	0.00133114	-0.99003
1980050	PTGS1	0.052698	0.0113126	0.0748089	0.00208385	-0.532823
7650458	SLC9A1	0.0290185	0.011338	0.0446837	0.0035166	0.70174
6580692	C17orf87	0.0379335	0.011443	0.132213	8.81499e-06	0.994024
3170064	PLCB4	0.0311802	0.0114826	0.0567864	0.00169095	0.14319
4560541	SERPINB9	0.0396736	0.0115441	0.0708252	0.00110057	0.571258
7330377	CD79A	0.123482	0.0115543	0.155858	0.000795266	-0.241102
240577	PANK3	0.0267417	0.0115552	0.0561516	0.0012936	0.181257
6480259	RABGGTB	0.0384062	0.0115686	0.0656109	0.00148871	-0.480827
5960156	C19orf52	0.0294701	0.0115932	0.0586744	0.00130966	0.365771
10161	CARD16	0.0652528	0.0116676	0.0937114	0.00128441	0.592823
7560471	MAPK14	0.0299996	0.0116966	0.097795	7.26804e-05	0.408819
5310674	RAB4B	0.0707393	0.0117312	0.0905657	0.00249528	0.430941
3370327	NA	0.0365768	0.0117607	0.0595708	0.00208293	0.16241
2900451	C22orf28	0.0262861	0.0117647	0.0567688	0.00121652	0.707509
2680435	SFRS3	0.0265194	0.0118412	0.0623007	0.000824908	-0.854289
6660270	RPL37A	0.0358301	0.0118978	0.0935515	0.000154139	-0.349095
3390468	RIPK3	0.039448	0.0120245	0.0802831	0.000551388	0.483056
2060612	C22orf27	0.0358781	0.0121375	0.0583086	0.00224296	0.220804
5340100	NSF	0.0728064	0.0121921	0.107492	0.000809061	0.400881
620767	TAP1	0.03498	0.0122227	0.132238	7.59903e-06	1.53423
7200670	TOM1	0.0750919	0.0122689	0.100567	0.00166297	0.680302
2710646	IP6K2	0.0848132	0.0123396	0.1057	0.00235333	0.261485
4220672	TFIP11	0.0313137	0.0124575	0.092696	0.000124547	0.48237
990615	LASP1	0.0311731	0.0124724	0.065484	0.000955384	0.608461
2760605	TCERG1	0.0289229	0.0124945	0.0623067	0.00103168	-0.214566
3120452	U2AF1L2	0.174394	0.0125095	0.193718	0.00228605	0.526237
1430653	SLC25A3	0.0380315	0.0125364	0.0582946	0.00271392	0.288823
7650026	NA	0.0335735	0.0125705	0.0758291	0.000526725	0.147736
4120487	RASSF6	0.0543846	0.012572	0.0929907	0.000650145	-0.429566
5490470	NOTCH2	0.167646	0.0126178	0.193675	0.0013043	-0.674455
6650451	GAK	0.0342861	0.0126365	0.0712205	0.000787875	0.736482
3930195	EIF4G2	0.0403122	0.0127168	0.085964	0.00040262	0.91188
2810132	IFT52	0.0271943	0.0128357	0.0594924	0.0011529	-0.522854
3990010	FAM102A	0.0664462	0.012929	0.120524	0.000192098	-0.209709
6940605	FAM32A	0.0249378	0.0129597	0.0504198	0.00194145	0.733901
1500291	KILLIN	0.049892	0.013025	0.0701724	0.00275956	1.45166
2490315	CCDC14	0.0295373	0.0130253	0.0582034	0.00152453	-0.324
20519	ATP6V1D	0.0496227	0.0130457	0.0704675	0.0026486	0.383878
6100017	LAT	0.0333274	0.0130652	0.0611454	0.00161573	-0.272752
3170524	CXXC5	0.092645	0.0131514	0.139263	0.00031494	-0.96995
5720601	FAM122B	0.0307043	0.013254	0.0562018	0.00195941	-0.533973
5960369	RPP21	0.0268098	0.0136332	0.054462	0.00172801	0.791938
7100369	LOC440836	0.0354082	0.0136383	0.0996859	0.000106637	0.430937
1820154	SRPR	0.0304285	0.0136606	0.0560882	0.00199403	0.755426
360646	FAM13B	0.0693863	0.0137871	0.102208	0.00106256	-0.575503
1400014	NA	0.0272915	0.0139047	0.0585943	0.00134015	0.154829
4570022	RBM23	0.0664291	0.0139513	0.113305	0.000362547	0.650179
20348	GLG1	0.0456602	0.0140232	0.0786692	0.0011346	0.447911
3850736	MEX3D	0.0334634	0.0141123	0.0654179	0.00127526	-0.19813
1340576	SH3RF1	0.0326005	0.0141402	0.0749022	0.000588796	-0.282631
2630736	MLKL	0.0269636	0.0142168	0.0896792	0.000130165	0.932228
5910646	LSM10	0.0297168	0.0143151	0.0747755	0.00048901	0.681348
4590047	EP400	0.0413982	0.0143452	0.121029	3.31748e-05	-0.570431
2570735	PJA1	0.0504616	0.0143728	0.0996023	0.000333233	0.248569
5860189	MRPL35	0.0325443	0.0143774	0.0609167	0.001702	0.379976
1260014	AIFM1	0.0494735	0.0145376	0.0708749	0.00281933	0.191185
3990553	PLEKHA2	0.0332124	0.0145452	0.0868152	0.000257337	0.307907
2760309	FMNL3	0.0370236	0.0145754	0.105551	8.13159e-05	-0.222451
5960095	SLC25A4	0.0233	0.014678	0.0686568	0.000500722	-0.183219
6250440	EVI5L	0.0327671	0.0147191	0.0548699	0.00278453	0.440867
4010243	KIAA1267	0.06236	0.0147584	0.101434	0.000712019	-0.777006
6480692	AP1S1	0.0234141	0.0148637	0.048073	0.00236193	0.470636
4230021	C15orf44	0.0417993	0.0150991	0.0835003	0.000636075	0.279783
7650538	KIAA0460	0.0239416	0.015183	0.043929	0.00340884	-0.386813
110561	ZDHHC5	0.0287095	0.0153033	0.0531933	0.00243663	0.446923
6840189	BCKDK	0.0281493	0.0154281	0.0646544	0.00100128	0.786768
4560367	PES1	0.0282813	0.0155942	0.0667011	0.000876194	0.412032
6180598	NA	0.0317301	0.0156124	0.0826795	0.000338135	0.78845
6450050	ACSL3	0.0267062	0.0157076	0.0650132	0.000893857	0.168088
3140193	SLC7A1	0.0788252	0.0158873	0.122664	0.000496169	-0.438008
4200692	PICALM	0.0413103	0.0159803	0.0811051	0.000776926	0.362831
3140386	ACAD11	0.0498711	0.0161708	0.0760818	0.00216158	-0.265186
510468	YIPF1	0.0303309	0.0162465	0.0732667	0.000645059	0.460278
5340768	CDK2AP2	0.0286928	0.0164467	0.0610563	0.00144843	0.528702
4260019	PHIP	0.0292605	0.0164535	0.0649026	0.00113195	-0.719761
630553	FBXL10	0.0290569	0.0164593	0.0865574	0.000219165	-0.579866
4590070	NDUFA2	0.0224064	0.0165257	0.0605639	0.000960474	0.575146
1050020	DHRS13	0.0279301	0.0165849	0.0733299	0.000551161	0.22519
6280037	ATP6V1H	0.0395651	0.016616	0.0702319	0.00161807	0.34259
7210128	TM9SF1	0.0299803	0.0166298	0.0577024	0.00206586	0.393753
6560402	PLEKHO1	0.0483914	0.0166751	0.0946335	0.00048266	0.619732
1410484	NCK2	0.0346078	0.0166781	0.0812061	0.000494318	-0.592191
5260138	SMPD1	0.0241771	0.0166978	0.0460961	0.00323494	0.23738
6960129	BZW2	0.0451418	0.0167107	0.0671621	0.00309931	-0.407063
4480767	CCNB1IP1	0.030174	0.0167371	0.0748985	0.000580293	-0.425266
7650097	RSAD1	0.0265934	0.0167567	0.0539413	0.00215543	-0.266424
6280543	PARP9	0.0262634	0.0169167	0.107144	3.86735e-05	1.6497
3310025	MR1	0.0341955	0.0169837	0.154562	1.67427e-06	0.997486
2320619	TRIM24	0.0238794	0.0170252	0.0600179	0.00114353	-0.817562
520392	NA	0.0290802	0.0170691	0.0736337	0.000601053	0.752063
7550333	CCND2	0.0476113	0.0170715	0.0730651	0.00242372	-0.542624
3440477	PHYH	0.0222014	0.0171257	0.0448239	0.00315618	-0.704298
1940736	YME1L1	0.0248226	0.0172724	0.0538612	0.00196339	0.548698
4150017	NMT1	0.0246227	0.0173691	0.0458745	0.00352891	0.515695
460086	MAPKAPK5	0.0234495	0.0175504	0.0603533	0.00111304	-0.702744
2070059	APOL2	0.0438883	0.0177141	0.093067	0.0004151	0.346916
4150692	PLAC8	0.0567156	0.0177818	0.101657	0.000549575	1.11178
1170102	RFTN1	0.037766	0.0179141	0.0669118	0.00195868	-0.413173
5700735	PFKFB4	0.0363964	0.017915	0.0699963	0.0014038	0.599508
6100594	ETV7	0.037979	0.0179469	0.0885356	0.000387279	0.34814
3450397	C19orf2	0.0204442	0.0180008	0.0514667	0.00177974	-0.525895
580187	MAPBPIP	0.0234572	0.0180305	0.0506437	0.00235534	0.68536
4850327	CDKN2B	0.108393	0.0180687	0.132256	0.00255216	0.355606
10463	HRB	0.0505763	0.0182061	0.0838187	0.00141057	0.700469
5960358	EXT1	0.0956906	0.0183826	0.159079	0.000109165	0.625999
1500066	ELOVL5	0.0264727	0.0184246	0.057461	0.00179845	-1.41627
940021	UBAC2	0.0498781	0.018542	0.0746035	0.00276105	0.472127
5270139	C16orf63	0.0340281	0.0185423	0.0553482	0.00368163	-0.586515
7400653	POLR1E	0.0384497	0.0185953	0.0627506	0.00292417	-0.426301
2070291	ZFAND1	0.0263515	0.0187103	0.0518656	0.00274856	-0.783011
6900014	AKR1A1	0.0291156	0.0189219	0.069145	0.000930278	0.712847
6100521	RPS6KA2	0.0289486	0.0189812	0.0675398	0.00103992	-0.275474
7150189	C6orf204	0.0663342	0.019223	0.109574	0.000651711	-0.686447
6580164	CHRNA2	0.0247704	0.0192235	0.0543326	0.00209143	0.133756
7000377	KCTD11	0.0265698	0.0193285	0.0578256	0.00184462	0.195021
1340047	BATF2	0.0286058	0.0194094	0.134904	6.047e-06	0.681519
5860187	DDX50	0.0390387	0.0194576	0.0976107	0.00022566	-0.354996
1470315	SLC38A1	0.131822	0.0197492	0.206165	3.68414e-05	-0.49854
2000068	SDCCAG3L	0.0225163	0.0200396	0.0565218	0.00157048	0.142214
3130136	NA	0.03546	0.0200589	0.0689884	0.0015751	-0.89746
3130066	TMEM208	0.0258907	0.0202999	0.0931641	0.000129179	0.515983
6590243	C20orf106	0.0422964	0.020458	0.0937344	0.000402206	-0.211059
1980687	LRRC16	0.040472	0.0205251	0.066636	0.00277923	0.167346
3610274	ZNF74	0.0280232	0.020555	0.0937898	0.000144888	0.208599
4830113	ANXA4	0.0222348	0.0206115	0.0452993	0.0036487	-0.814777
2490372	SDCCAG8	0.0372215	0.0206805	0.0612133	0.00332199	0.213603
2850110	HMGB1	0.019911	0.0207369	0.0543139	0.00158562	-1.0461
6250327	RNF144	0.0659393	0.0207398	0.105676	0.000921682	0.286233
6510465	IL15RA	0.0212762	0.0208188	0.0498135	0.00245461	0.281307
1430156	PITPNA	0.0567396	0.0208504	0.127212	8.7194e-05	0.454351
3450280	KIAA1267	0.0358208	0.0209894	0.068533	0.00174725	-0.709638
6940255	C10orf104	0.0388767	0.0210998	0.109997	9.29495e-05	-0.752751
7150132	PRDX5	0.0211593	0.0211385	0.0522668	0.00205713	0.680782
6380338	POLR2F	0.0191703	0.0212077	0.0457675	0.00289903	0.662073
4590608	TRIM37	0.0334316	0.0212888	0.0580505	0.00328087	0.160112
7330228	RABGGTB	0.0295815	0.0214087	0.0700249	0.00101159	-0.578814
2120286	COPA	0.0180904	0.0214373	0.0665513	0.000577967	0.613203
4040504	SNX11	0.0202668	0.0217118	0.0573937	0.00135082	0.644438
6370762	UFD1L	0.0400948	0.0217722	0.0772618	0.00127529	0.143778
4780632	C11orf48	0.0192828	0.0217955	0.0510584	0.0020241	0.86378
7610162	NCKAP1L	0.0316157	0.0218024	0.0586151	0.00281524	0.545916
2810707	ARMET	0.0271221	0.0223323	0.0603211	0.00182651	0.567909
6280059	ATF5	0.0206471	0.0223809	0.0491305	0.00264379	0.849364
5670609	TMPO	0.0612939	0.0224099	0.0846395	0.00360019	0.272137
380541	ERICH1	0.0776803	0.0224862	0.109164	0.00183704	0.753692
520750	SYNGR2	0.0351371	0.0225459	0.0680968	0.00183828	-0.166389
5960343	EIF4E2	0.0172732	0.0228113	0.0439575	0.00309951	0.541474
3290731	RASSF5	0.0180636	0.0229899	0.0428846	0.00358101	0.598409
3170255	SLC25A22	0.0179951	0.0229944	0.0550074	0.00144738	0.414263
5810689	RSU1	0.0181649	0.0230093	0.0439094	0.00334531	-0.602901
6350112	TOX2	0.028399	0.0231746	0.0597485	0.00216646	0.134041
5700538	C6orf204	0.052487	0.023181	0.0923794	0.0010567	-0.620348
1110100	ISY1	0.0210879	0.0233259	0.0520747	0.00227935	0.621593
2000445	KAT5	0.0620456	0.0234088	0.116182	0.000339816	0.230588
2360682	EFTUD1	0.0235437	0.0234191	0.0578788	0.00177098	0.243698
3180026	KIAA1147	0.0228302	0.0234444	0.0812519	0.000292289	-0.671531
7210326	CCDC88C	0.0230217	0.0236744	0.0521884	0.00263634	-0.505616
3420632	AP1B1	0.0183031	0.0238642	0.0499089	0.00223897	0.500736
1010168	B3GNT5	0.0196625	0.0243449	0.057395	0.00144071	-0.318629
1070450	PDE7A	0.0310737	0.0245893	0.0794411	0.000630304	0.176842
7150152	PSMG1	0.0341079	0.0246659	0.0666264	0.00207462	-0.404161
6860687	ETS1	0.0715932	0.0247186	0.137039	0.000139374	-1.41078
7000270	CPPED1	0.0168099	0.0248168	0.0460619	0.00277748	-1.06863
1410044	GPR56	0.0263916	0.0248968	0.105582	6.27453e-05	-0.758148
4050102	SETD6	0.0289503	0.0250985	0.0682143	0.00128607	-0.273765
7560719	CMTM7	0.0164543	0.0254236	0.0670509	0.00058144	0.513524
6590341	ASCC2	0.0231484	0.0254295	0.0594628	0.0016523	0.72343
3390192	PDGFC	0.024877	0.0255512	0.0796776	0.00041205	-0.957645
510484	APEX2	0.0245621	0.0257526	0.0620017	0.00153077	0.440407
1010047	ZBP1	0.0423405	0.0259475	0.113485	0.000110005	1.0834
4730685	PPP1R15B	0.0171413	0.0261076	0.0435702	0.00359282	-0.236103
2600538	CPT1A	0.0174652	0.0261443	0.0512031	0.00208689	0.153543
3990482	TRAFD1	0.0274757	0.0262378	0.0627137	0.00182289	0.551359
2320707	NA	0.0174959	0.0262461	0.0462702	0.00303024	0.16259
6590725	XRCC4	0.0194943	0.0262757	0.0584793	0.00141043	-0.272414
2690735	PRRG4	0.0167826	0.0262962	0.0854882	0.000154388	0.413722
940753	LCOR	0.0407641	0.0263341	0.0789654	0.0014067	-0.526778
2900292	LOC121456	0.0205999	0.0263422	0.0780231	0.000354449	0.15008
780050	CD2	0.191648	0.0265207	0.245666	0.000194998	-0.656609
2650564	SAMD9	0.0313747	0.0266295	0.0574362	0.00365681	0.8472
1850592	C14orf124	0.0161632	0.0267788	0.0570739	0.00125647	0.550955
630240	CD8A	0.0269152	0.0267902	0.0870745	0.000284617	-0.884416
2100292	KLF12	0.0203149	0.0268093	0.0831856	0.000239489	-0.280558
2510523	HNRPUL1	0.0176324	0.0269955	0.0540431	0.00176195	-0.947496
2190743	LOC402057	0.0187904	0.0270612	0.0564074	0.00160895	-0.529791
540392	PAQR7	0.0152332	0.0272392	0.044997	0.00293065	-0.500089
1260497	R3HDM1	0.0155116	0.0273891	0.0532292	0.00163026	-0.449275
5340167	GABBR1	0.0553549	0.0275067	0.0823245	0.00334341	-0.37895
1780736	S100A8	0.0353038	0.0275227	0.0773351	0.00111459	0.31015
7570192	GBGT1	0.0271062	0.0275333	0.0603726	0.00221439	0.640424
1340288	HEXIM2	0.0273307	0.0276182	0.0677734	0.0012936	0.272024
360142	SSBP3	0.0308316	0.0276484	0.0620388	0.00257215	-0.27527
7040333	NR3C1	0.0158021	0.027661	0.0721087	0.00041164	0.396047
20324	DHRS12	0.0507621	0.0277998	0.130403	5.73203e-05	0.233977
1820682	DDX19A	0.0271496	0.028251	0.0589628	0.00253046	-0.394105
3450041	C5orf5	0.0370106	0.0282746	0.0687453	0.00248592	-0.553754
2370445	REPS2	0.0327251	0.0283118	0.0610767	0.0032498	-0.269221
3450136	ATP5EP2	0.0227493	0.0285672	0.0520805	0.00311302	0.302756
620538	PLD3	0.0314124	0.0285692	0.0633748	0.00250211	0.300292
4180544	TM9SF1	0.0208552	0.0286677	0.0508668	0.00298108	0.407062
3400482	ZNF641	0.0155605	0.0289665	0.0473569	0.00266817	-0.593938
3170184	VNN2	0.0162941	0.0291489	0.0503456	0.00226527	2.22887
4180110	SNX27	0.0284386	0.0292095	0.110278	5.84762e-05	0.737666
830739	GART	0.0778544	0.0294471	0.169516	1.88705e-05	0.573739
2970563	PRR19	0.035297	0.0294976	0.0694621	0.00216043	0.143114
5360424	ARF4	0.0137013	0.0296799	0.0500035	0.00196246	1.02696
3890408	RTN1	0.0170673	0.0296959	0.0452343	0.00356685	0.346025
540382	2002-08-31	0.0404447	0.0297721	0.109929	0.000143375	-0.325813
6110209	CDYL2	0.0158762	0.0297934	0.0481434	0.00264348	0.139916
5670195	TACO1	0.0178648	0.0298149	0.0492719	0.00280682	0.434565
3460039	ZNF789	0.0295511	0.0300532	0.0768977	0.000825069	-0.194282
7400368	NA	0.0162919	0.0301115	0.0451543	0.0034372	0.131312
6380431	METTL13	0.0888082	0.030243	0.125572	0.00154103	0.428386
110682	ADPRH	0.0446205	0.0303622	0.08513	0.0013305	0.536129
2810315	ATOX1	0.0182286	0.0305694	0.0625157	0.00109787	0.845937
6060468	S1PR5	0.0146419	0.0307678	0.059368	0.00108193	-0.278988
3170189	TMEM209	0.0183332	0.0308393	0.0629173	0.0010822	-0.71352
4810768	LOC644063	0.0171397	0.0313564	0.0511431	0.00242927	1.41892
1440750	SP140	0.0130624	0.0313566	0.0621002	0.000803365	0.525122
2680523	MIA3	0.020998	0.0314699	0.0838042	0.000277879	0.285097
1240142	PACSIN2	0.0205707	0.0317394	0.066769	0.000977397	0.574544
3170136	ARGLU1	0.0399132	0.0322397	0.0831074	0.00116358	-0.730048
2230537	SLC26A8	0.0213146	0.0323204	0.0606029	0.00166404	0.179896
520600	C1orf56	0.0133246	0.0324684	0.0422648	0.00369299	0.15433
2680519	C22orf13	0.012438	0.0327258	0.0448822	0.00287344	0.422046
3850767	MUL1	0.0156217	0.0327288	0.0479694	0.00287195	0.515913
7200292	ARAF	0.0277012	0.0327519	0.0567886	0.00356686	0.514303
3450563	MOBK1B	0.0319838	0.0328132	0.0733019	0.00140087	0.519083
6840725	PNN	0.0302836	0.0328301	0.105993	0.000102924	-0.836444
460458	GCH1	0.0337099	0.0329057	0.109102	0.000103535	0.715922
840768	FAIM3	0.0931291	0.0329386	0.169484	6.53969e-05	-1.24183
20156	PHF11	0.0176187	0.0329438	0.0584797	0.00152301	0.665881
3390021	LOC648740	0.0188416	0.0330098	0.0678033	0.000829207	-0.462599
3060379	TOR1B	0.0145729	0.0330148	0.0672497	0.000638658	0.643709
6370133	SNORD52	0.0837613	0.0330488	0.139609	0.000368026	-0.250601
6940358	FKBP4	0.0560605	0.0330596	0.103056	0.000837417	0.542032
1440243	PSMB8	0.0158582	0.0333285	0.0514507	0.0022924	0.696814
3400672	OCIAD2	0.0210733	0.0334879	0.0587342	0.00194437	-0.180206
1230156	CEP350	0.0136616	0.0339385	0.0459181	0.00300596	-0.725508
2030309	C11orf67	0.0123637	0.0346131	0.0558923	0.0013292	0.529331
6380709	ZNF791	0.0172729	0.0348209	0.0534981	0.00226919	-0.529675
5810437	NA	0.0176746	0.035476	0.0818755	0.000283645	0.17652
2060433	VAMP5	0.0338194	0.0358548	0.104502	0.000160676	1.33246
4010445	CASP9	0.017715	0.0359468	0.0591532	0.00158124	0.256832
5900561	GBP4	0.0131208	0.0367541	0.0662885	0.00068341	1.84816
6960372	NA	0.0241455	0.0372832	0.0792589	0.000571613	0.150028
1410358	TMED1	0.0217318	0.0373025	0.0579208	0.00239623	0.641058
4220053	INPP1	0.0140431	0.0374077	0.0522478	0.00211177	0.410058
1710286	CROP	0.0228078	0.0375213	0.0695451	0.00108673	-0.521527
1820037	CWC22	0.02976	0.037597	0.0663213	0.00229454	-0.404258
830022	LOC100130542	0.0334832	0.0379267	0.0961723	0.000312657	0.193277
3710075	GATAD2B	0.0221126	0.0380503	0.0694393	0.00105572	-0.749121
4250241	MAGED2	0.0143348	0.0384193	0.0610454	0.00114701	0.30675
2900121	TAPBP	0.025706	0.0389783	0.0756584	0.000873631	0.242262
4210626	C11orf54	0.0213092	0.0390181	0.0679167	0.00114372	0.212516
2360392	MYST3	0.0148916	0.0392407	0.0800986	0.000292206	-0.859485
4250204	CD96	0.0514956	0.0396042	0.104508	0.000630719	-0.335196
6220451	UBXN11	0.0218896	0.0397044	0.058656	0.00243032	0.245725
270240	ERGIC1	0.0534812	0.0406399	0.103456	0.000811032	-0.296691
1440300	USP13	0.0561787	0.0406615	0.0961369	0.0017524	-0.229902
4590370	ADAP2	0.025701	0.0408216	0.0767745	0.000837328	0.627526
6180465	TPD52L2	0.0242107	0.0408979	0.0661591	0.00167923	0.580471
4490475	CCDC50	0.0348198	0.0412077	0.0877336	0.000707531	-0.152592
4730634	KYNU	0.0260405	0.0417584	0.0818706	0.000595533	0.95958
5390403	TMEM127	0.0453419	0.042381	0.0876732	0.00157082	0.383287
7320382	NA	0.0130549	0.0424792	0.0602167	0.00122168	0.150176
6220332	STXBP5	0.0311658	0.0426208	0.0945398	0.000333624	-0.406447
20241	EAF1	0.0115216	0.0427194	0.0441612	0.00364056	-0.938889
10133	EHD1	0.0343498	0.0427451	0.0962727	0.00036794	0.811285
3890709	COBLL1	0.0492276	0.0428075	0.0925156	0.00145264	-0.219123
70433	RANGAP1	0.0259502	0.0430576	0.0753363	0.00099781	0.590281
4850278	UPP1	0.0239283	0.0432791	0.0737592	0.000976922	0.904009
830349	SNORD33	0.00905061	0.0433571	0.0455851	0.00278035	0.131037
10356	ST6GAL1	0.042563	0.0436429	0.0930573	0.000869335	-0.72193
6840326	ROMO1	0.011441	0.0437961	0.0620125	0.000980001	0.714445
3870519	TRIM22	0.0193531	0.043946	0.0557074	0.00277337	1.22461
3450630	SPHK2	0.0342439	0.0441027	0.0693101	0.00294312	0.54806
2070349	GZMH	0.0350052	0.0445571	0.106859	0.000177411	-1.05574
130446	RAB7A	0.0792372	0.0446372	0.128463	0.000841263	0.372971
3360132	GHRHR	0.0177822	0.045013	0.0537577	0.00293	0.138148
7320576	ZCCHC7	0.0167677	0.0450457	0.0506399	0.00344195	-0.556437
6480095	KIAA0090	0.0293305	0.045079	0.0635392	0.00324893	-0.386645
5720382	TRAF5	0.0142618	0.0451219	0.0577347	0.00169345	-0.184755
540136	PARP6	0.00959508	0.0454031	0.0542085	0.00158875	0.183837
6400681	CBR1	0.0126999	0.0458256	0.0588368	0.00141527	0.490234
870193	MYCBP2	0.0196496	0.0461631	0.0582531	0.002449	-0.523337
1770730	LDOC1L	0.0214478	0.0463526	0.0617634	0.00214949	-0.324619
50754	ARL4C	0.0591296	0.0463872	0.099403	0.0019111	-0.292094
3800725	C5orf15	0.0263137	0.0472809	0.0717957	0.00145831	0.434291
5700707	CD8A	0.0175832	0.0475792	0.072389	0.000750894	-0.765667
3180521	WARS	0.00923266	0.048125	0.0739824	0.000373864	1.16919
2570471	PSMB6	0.0159321	0.048346	0.0610834	0.00158202	0.685329
6840753	NA	0.00929482	0.0488359	0.0473469	0.00276984	0.142881
3120367	SAMD9L	0.020649	0.0490608	0.0649114	0.0016866	1.13217
6770707	TM2D3	0.0153866	0.0492267	0.0750255	0.00054369	0.364151
4290075	AHSA1	0.0701201	0.049483	0.110638	0.00191578	0.507117
6290112	MTMR1	0.0256402	0.0501904	0.107984	9.31812e-05	0.156904
7570551	LARP1B	0.00936979	0.0503468	0.0497929	0.00238702	-0.420986
5890753	C20orf52	0.0107229	0.0506839	0.0601299	0.00122409	0.737001
6480196	TSPAN13	0.0258302	0.0507956	0.0714339	0.00154512	-0.212249
7160292	AUTS2	0.0173226	0.0510962	0.0963186	0.000128865	-0.188241
1710630	LYRM7	0.0456908	0.0516057	0.120748	0.000148026	-0.517034
4250202	DBP	0.0393324	0.0519371	0.07602	0.0029787	-0.402891
3940672	SBK1	0.0262817	0.0523826	0.0769045	0.00108434	-0.228064
1660397	LOC645058	0.0287713	0.0524131	0.0826529	0.000838414	0.473023
620711	FLJ36848	0.00899813	0.0530135	0.0613417	0.00103097	0.202584
830424	COX4I1	0.00876425	0.0532018	0.0543226	0.00171603	0.432919
3460707	PSMB10	0.0165897	0.0532639	0.0659227	0.00125953	0.66465
2510066	APBA3	0.0449476	0.053618	0.0816939	0.00300285	0.482003
7160136	LBH	0.106312	0.0540936	0.178229	0.000134706	-0.51162
7400343	APOL2	0.0307066	0.0543841	0.0763989	0.00160474	0.288162
2350703	RARRES3	0.0291987	0.0546644	0.0951597	0.000345734	1.16647
5090068	ABLIM1	0.0697639	0.0549273	0.130939	0.000408261	-0.465818
7550022	RNASE4	0.00944411	0.0553201	0.0728445	0.000468112	0.856245
7550167	SLC17A9	0.0273911	0.0558107	0.0641508	0.00327561	-0.130652
4540102	ZNF318	0.0122232	0.056198	0.0777439	0.000399469	-0.651459
4880500	GPT2	0.0421285	0.0563139	0.128621	6.68202e-05	0.260477
1690719	CCL5	0.0210816	0.0567238	0.0672051	0.00166995	-1.0884
6620544	TRIM11	0.00880259	0.0569747	0.0518413	0.00220289	0.360567
4850735	N4BP2L2	0.00618257	0.0569854	0.0551226	0.00143301	-0.180431
7330392	RAB11FIP1	0.00938622	0.0581035	0.0535735	0.00205448	-0.714196
7560039	BLK	0.0921698	0.0582994	0.132393	0.00210672	-0.305963
2570139	DEFB1	0.0249503	0.0583774	0.0807084	0.000814082	0.343726
2750592	NAB2	0.0713481	0.0587428	0.116745	0.00151252	-0.205077
2680021	MALT1	0.0115672	0.0589478	0.052885	0.00256081	-0.561844
7550411	RNF114	0.0164535	0.0593085	0.0534778	0.00350151	0.437527
4490600	LIX1L	0.0245932	0.0594528	0.160541	1.62714e-06	0.413278
4900348	DDRGK1	0.0056297	0.0595891	0.0454257	0.00294972	0.566549
5670100	XPOT	0.0193858	0.0601306	0.0575812	0.00321911	0.170735
4570672	BTBD1	0.0180471	0.0606001	0.0650707	0.00167447	0.308351
1410653	ARRDC2	0.00573712	0.0610585	0.0447006	0.00320735	-0.511845
2120402	CD97	0.0216994	0.0612264	0.0738918	0.00112837	0.604459
2100332	LOC92497	0.00746742	0.0612564	0.0540489	0.0018146	-0.212335
2940435	STAT6	0.0286398	0.0618192	0.0676921	0.00300894	0.790503
3190379	GPBAR1	0.00581737	0.0621339	0.0507398	0.00209138	1.03816
1740471	OVCA2	0.00477504	0.062152	0.0479324	0.00239344	0.201718
6760546	OASL	0.0202255	0.0621832	0.0745309	0.000981143	1.38772
3180224	HNRNPAB	0.0264346	0.0629941	0.0669165	0.00276428	0.599376
2470093	FBXW7	0.0328837	0.0658733	0.119019	8.41046e-05	-0.784038
1500180	KIAA1958	0.0140909	0.0659573	0.0694377	0.000981014	0.230839
830440	NDUFB6	0.00460593	0.0663912	0.0477244	0.00254899	0.521797
3390612	AHNAK	0.0731355	0.0665766	0.132623	0.000544712	-0.821377
6480360	L3MBTL3	0.0112979	0.0667139	0.0598724	0.0016652	-0.461857
2710025	ZNF318	0.00813508	0.0668848	0.0606332	0.00125983	-0.520731
780296	MRPL22	0.0322788	0.0669348	0.0717527	0.00309605	0.495451
1990653	VAMP8	0.0568838	0.0683825	0.116235	0.000612033	0.859912
6400411	CABIN1	0.0179091	0.0686925	0.0575523	0.00327054	-0.494373
650519	C7orf55	0.0109591	0.0702409	0.0535155	0.00273978	0.414695
1580356	CD2BP2	0.0260876	0.0708663	0.0660764	0.00319514	0.505103
5310379	FCRLA	0.102474	0.0715837	0.138863	0.00334991	-0.823357
7330347	RNF121	0.0332451	0.073259	0.0827675	0.00154988	0.193847
4670414	ADAR	0.0114121	0.0732751	0.0641437	0.00132527	0.620616
2680598	FCRL3	0.104867	0.0734834	0.176839	0.000177196	-0.532472
4610646	XAF1	0.00677123	0.0741384	0.0873057	0.000169696	1.4908
4120066	ZNF702P	0.0294809	0.075114	0.133709	2.35166e-05	0.800542
1440343	COX8A	0.00407491	0.0751562	0.0507889	0.00218388	0.554559
3460575	FXYD6	0.0222909	0.075756	0.069354	0.00200759	0.673875
2100709	CBLL1	0.00862793	0.0760086	0.0522681	0.002732	-0.430356
3140768	SCAMP3	0.0142739	0.0765181	0.0552935	0.00328529	0.52684
3400630	SLC6A12	0.035565	0.0785413	0.118435	0.000124042	0.582996
6520725	SAP30BP	0.0048767	0.0812374	0.0461822	0.00349304	0.206717
2360706	SKAP1	0.0332599	0.0815208	0.0805897	0.00201578	-0.388413
6180056	C22orf9	0.00949264	0.081558	0.0551471	0.00249446	0.218073
1010736	FER1L3	0.0129313	0.0820226	0.0596524	0.00228646	0.888152
6270241	CSNK2A1P	0.0055316	0.0820514	0.048327	0.00314687	0.21266
20347	SERPINB8	0.00564915	0.0823352	0.073304	0.000492524	0.630895
7510719	SAMD4A	0.0474371	0.0832375	0.109684	0.000607612	0.678563
7610598	PPPDE2	0.0186114	0.0839138	0.0816341	0.000665557	0.507384
1570129	CEP110	0.00473932	0.084337	0.0614547	0.00114453	0.455912
7380180	GNPDA1	0.00808831	0.0862056	0.0544359	0.0024995	0.78251
3840356	NA	0.0140284	0.0863224	0.0573079	0.00308783	0.143234
6560075	PARP10	0.008228	0.0870039	0.0552443	0.00239569	0.682956
5960747	DTNBP1	0.00337068	0.0871515	0.0488969	0.00272742	0.164808
6510196	SNORD83B	0.0432543	0.0886061	0.0874306	0.002668	-0.146511
1990441	CD3E	0.0396469	0.08972	0.100169	0.000771134	-0.227185
990356	TM9SF1	0.0318469	0.0897246	0.0959063	0.000610099	0.231296
4730564	SLC25A28	0.019362	0.0900922	0.0804103	0.00081939	0.664563
2370328	GPR56	0.00646224	0.0905933	0.051074	0.00299024	-0.60686
6660131	ST3GAL2	0.00711821	0.0913937	0.0970953	9.91883e-05	0.457242
6860753	POLB	0.057233	0.0918326	0.102926	0.00232195	0.488725
5960632	EP300	0.00719485	0.0951883	0.0555731	0.0023499	-0.893005
290343	CD3D	0.0405705	0.0954402	0.0889226	0.00208067	-0.93461
3400349	ATG4A	0.00447967	0.0954975	0.0575336	0.00167854	0.282345
2030307	SLC35E1	0.0115331	0.0960258	0.0557645	0.00318385	-0.485619
5260692	ANKRD22	0.0110293	0.0970911	0.107256	6.30197e-05	1.67701
2850202	NT5DC1	0.0123555	0.0981171	0.083499	0.000425282	-0.650141
6580521	SLC25A10	0.0129706	0.0994752	0.105935	8.14265e-05	0.326885
1230242	HNRPM	0.00199529	0.105739	0.0759176	0.000389243	0.221735
6420541	ANG	0.00446942	0.107976	0.0498457	0.00331549	0.830709
4880703	LOC374395	0.000478295	0.109199	0.047098	0.00309341	0.459812
4230484	RAP2A	0.002288	0.110117	0.0490452	0.00306473	-0.643117
4760458	KIAA0831	0.00631892	0.110137	0.0875016	0.000227386	-0.494367
7610594	ACPT	0.00373845	0.110446	0.0503257	0.00309619	0.24284
730100	CYorf15B	0.590633	0.111378	0.609736	0.00314158	-0.171144
70041	CCBL2	0.00267525	0.11191	0.0642228	0.00102803	-0.574562
7570673	CXCR5	0.0204995	0.113113	0.0801131	0.00110543	-0.271376
4210041	CUL1	0.0140458	0.113414	0.101903	0.000133407	0.885093
7160037	PYHIN1	0.0100611	0.116578	0.0717162	0.00102016	-0.249341
2490382	SQLE	0.00682463	0.11745	0.0543768	0.00300423	-0.548759
4200575	DPP8	0.0288477	0.118978	0.089223	0.00104672	-0.468327
2630195	RNASE4	0.000826708	0.121467	0.0503135	0.0027345	0.771884
5910128	FLJ39827	0.0151992	0.12252	0.061099	0.00342506	0.292699
1940300	SV2A	0.0314755	0.126897	0.076074	0.00368038	0.252913
5220491	GZMA	0.0155696	0.127981	0.071373	0.00167611	-0.999345
7100161	HOPX	0.0395853	0.130337	0.111584	0.000433898	-0.544168
7650735	BPGM	-0.00032493	0.132652	0.0615962	0.00117038	0.275202
1260451	SDSL	0.00237523	0.135924	0.0514143	0.00309398	0.427774
3710068	AGPAT3	-0.00357413	0.136212	0.0488112	0.00246952	0.46348
4860224	C9orf114	-0.00516128	0.144895	0.0443833	0.00323285	0.560307
4860239	SERPING1	0.00145283	0.145083	0.079413	0.000375423	1.26313
1030201	GMPR	0.00043915	0.149479	0.0502495	0.00318665	0.380141
7210040	ASAP1	-0.00349899	0.150923	0.0647821	0.000822859	-0.717176
5290403	C16orf75	-0.00242328	0.157167	0.0620814	0.00112176	0.205085
450431	FYTTD1	-0.000578067	0.163944	0.0704541	0.000705829	0.198528
450189	DYRK2	0.0277067	0.167496	0.0931296	0.000948105	-0.534949
4560730	WARS	-0.00486938	0.170694	0.0485943	0.00276387	0.93223
4050735	ZCCHC14	0.0499655	0.17169	0.0975498	0.0035075	-0.268844
5560044	IL27	0.0560631	0.171841	0.104368	0.00323562	0.259847
1400133	NA	-0.0048251	0.171963	0.0492118	0.00266397	0.106253
4880348	ANKRD22	-0.00305658	0.176058	0.0694441	0.000678686	1.35283
6450475	LOC401561	0.00762057	0.179392	0.0609254	0.00277064	0.167209
3360431	FGFBP2	0.0048986	0.180137	0.0676518	0.00138009	-0.661196
4880010	PRKCH	0.0725507	0.182542	0.119318	0.00359554	-0.514262
2900441	UBA7	-0.00367596	0.182563	0.0611317	0.00124591	0.698574
7040521	TNFRSF14	-0.00526224	0.185586	0.0575437	0.0014769	0.641676
4760538	GRK5	-0.00384446	0.198469	0.0706479	0.000645809	0.254353
2710402	WDR37	0.0749957	0.202606	0.128758	0.00219606	-0.464103
4900193	MUC1	-0.00844999	0.203251	0.0558104	0.0014463	0.24724
130670	ATPBD1B	-0.00587885	0.204014	0.0507523	0.00253131	-0.341735
7380707	HOMER2	-0.00654626	0.208091	0.0494507	0.00270348	-0.180034
6060477	FOXC1	0.00130156	0.20977	0.110832	4.57283e-05	0.207994
5890241	C2	-0.006808	0.210099	0.103645	4.5669e-05	0.665582
1980500	ZBTB46	0.0361835	0.221356	0.0903578	0.00271858	-0.267679
380152	GM2A	-0.0078044	0.223493	0.113563	2.09593e-05	0.857991
2760131	STX17	-0.00948969	0.23286	0.0827088	0.00020046	0.155391
50193	LZIC	0.0554997	0.23781	0.124041	0.000840295	0.254472
7050040	ARMCX3	-0.00317487	0.238812	0.0616928	0.00152788	0.162404
3870292	DFFA	-0.00496235	0.252071	0.0562898	0.00210479	0.141159
3440360	GATC	-0.0122916	0.256649	0.0426527	0.00352461	0.180106
1580202	C9orf91	0.0506783	0.257673	0.134467	0.000272898	0.495648
6650747	C20orf24	-0.0106576	0.272192	0.0522527	0.0020228	0.436985
6100196	INTU	0.0703686	0.274443	0.122543	0.00322666	0.164162
2630379	NHLRC4	-0.00999902	0.316866	0.0581368	0.00152593	-0.13829
3870707	B4GALNT4	0.00708119	0.386498	0.065556	0.00334237	0.177533
2190736	ANG	-0.0152434	0.388164	0.0447099	0.00331143	0.963172
1570468	HERC2	0.00638681	0.435816	0.0694697	0.00255347	-0.227256
3830192	C20orf100	-0.00470294	0.451039	0.0567117	0.00311898	0.2236
3800487	EBI2	-0.0176044	0.504629	0.05316	0.00176478	-1.43615
4060255	TCN2	0.0156466	0.50973	0.076637	0.00315081	0.630568
4890112	PARD6A	-0.0109396	0.605307	0.0576462	0.00221127	0.284387
4050673	CARD17	-0.0158624	0.753003	0.0564613	0.00187948	0.213708
[truncated: 25 more columns]
