# Supplementary material for: An evolutionary recent IFN/IL-6/CEBP axis is linked to monocyte expansion and tuberculosis severity in humans
Source: eLife. 2019 Oct 22;8:e47013. doi: 10.7554/eLife.47013 (PMC6819084; doi:10.7554/eLife.47013)
Supplement: Figure 7—source data 1. [file elife-47013-fig7-data1.xlsx]

## Sheet: Sheet1
Fig. 7a
	Human ISG (FC)	Mammalian ISG (mean FC)	Human-specific ISG	dsRNA UP human	CD34+Mtb UP 120h	TF enrichment CD34 24h	Berry TB signature	upstream mono TB	TB plasma proteome	TB susceptibility gene	disseminated TB UP	monocyte count GWAS	human pathogen adaptation (z-score)	Neandertal introgression	predicted ML ratio
IL6	1.3827	0.702389	0	3	1		0	1	1	1	0	0	2.546	0	0
CEBPB	0.724474	0.03673	1	1	1	2	0	0	0	0	1	0	2.576	0	0
CEBPD	1.33172	-0.15798	1	2	0	2	0	0	0	0	0	2	0.682	0	0
OAS2	6.5604	7.15747	0	0	1		1	0	0	0	0	0	1.473	1	3
STAT1	2.68534	3.08856	0	0	1	1	1	0	0	1	2	0	1.244	0	0
OAS1	7.93	8.66461	0	0	1		1	0	0	0	0	0	1.711	1	2
STAT3	0.91696	0.645066	0	0	0	3	0	1	1	0	0	0	1.609	0	0
STAT2	2.47324	3.11766	0	0	0		1	1	0	0	2	0	2.457	0	0
IRF1	3.70883	2.89465	0	0	0	0	1	1	0	1	1	0	1.283	0	0
ICSBP	0	2.74184	0	0	0	0	0	0	0	0	1	3	1.698	0	0
IL6R	-0.31153	-0.41276	0	0	0		0	1	0	1	0	1	0.777	0	1
IFNAR1	0.065137	-0.21008	0	0	0		0	1	0	0	0	0	0.759	0	1
IL6ST	0.164479	0.181996	0	0	0		0	1	0	0	1	0	2.184	0	0
CD38	4.81787	2.23187	0	0	0		0	0	1	0	0	0	1.877	0	0
CEBPA	0	-0.43754	0	0	0	1	0	1	0	0	0	1	0.893	0	0
SOCS3	0.77962	0.763473	0	0	0		1	1	0	0	0	0	1.331	0	0
CD14	0.402145	0.142213	0	0	1		0	0	0	1	1	0	0.263	0	0
KITLG	-0.59914	0.098046	0	0	0		0	0	1	0	0	0	2.235	0	0
MT2A	1.34	0.23	0	0	0		1	0	0	0	0	0	1.196	1	1
SOCS1	3.78497	4.50271	0	0	0		1	0	0	0	0	0	1.975	0	0
ELF1	1.15669	1.15669	0	0	0	1	0	0	0	0	0	0	1.716	0	0
CD34	1.55347	0.329643	0	0	0		0	0	1	0	0	0	1.454	0	0
CEBPE	0	-0.23666	0	0	0	0	0	0	0	0	0	2	0.283	0	0
CXCL10	12.6018	10.3861	0	0	0		1	0	0	1	0	0	0	0	0
CEBPG	-0.04691	-0.04141	0	0	0	0	0	0	0	0	0	0	1.522	0	0
CEBPZ	-0.35296	-0.06199	0	0	0	0	0	0	0	0	0	0	1.117	0	0
CXCL9	9.1444	6.2077	0	0	0		0	0	0	0	0	0	0.965	0	0
PU1	0	0.762743	0	0	0	0	0	0	0	0	0	0	0.454	0	0
