# Supplementary material for: An evolutionary recent IFN/IL-6/CEBP axis is linked to monocyte expansion and tuberculosis severity in humans
Source: eLife. 2019 Oct 22;8:e47013. doi: 10.7554/eLife.47013 (PMC6819084; doi:10.7554/eLife.47013)
Supplement: Supplementary file 1. [file elife-47013-supp1.xlsx]

## Sheet: Uninf_1d
	Term	Overlap	P.value	Adjusted.P.value	Old.P.value	Old.Adjusted.P.value	Z.score	Combined.Score	Genes
1	FGFR4 ligand binding and activation_Homo sapiens_R-HSA-190322	2018-02-14	0.00466913	0.479493	0.00555792	0.458889	-2.08266	11.1772	FGF1;FGFR4
2	Axon guidance_Homo sapiens_R-HSA-422475	9/515	0.0145861	0.479493	0.0109994	0.458889	-2.34764	9.92508	SPTA1;EPHA4;GDNF;FGF1;FGFR4;NEO1;NTN1;ANK1;MYH10
3	SHC-mediated cascade:FGFR4_Homo sapiens_R-HSA-5654719	2018-02-23	0.0124286	0.479493	0.013338	0.458889	-2.16035	9.47909	FGF1;FGFR4
4	Negative regulation of FGFR4 signaling_Homo sapiens_R-HSA-5654733	1931-02-01	0.0219809	0.479493	0.0226404	0.458889	-2.25968	8.6265	FGFR4;FGF1
5	EPHA-mediated growth cone collapse_Homo sapiens_R-HSA-3928663	1934-02-01	0.0261402	0.479493	0.026651	0.458889	-2.34265	8.53727	EPHA4;MYH10
6	Interaction between L1 and Ankyrins_Homo sapiens_R-HSA-445095	2029-02-01	0.0193771	0.479493	0.02012	0.458889	-2.1346	8.41813	SPTA1;ANK1
7	IGF1R signaling cascade_Homo sapiens_R-HSA-2428924	5/288	0.0631755	0.479493	0.0559401	0.458889	-2.40543	6.64342	SPTA1;GDNF;IGF1;FGFR4;FGF1
8	IRS-related events triggered by IGF1R_Homo sapiens_R-HSA-2428928	5/288	0.0631755	0.479493	0.0559401	0.458889	-2.3953	6.61542	SPTA1;GDNF;IGF1;FGFR4;FGF1
9	Signaling by Type 1 Insulin-like Growth Factor 1 Receptor (IGF1R)_Homo sapiens_R-HSA-2404192	5/288	0.0631755	0.479493	0.0559401	0.458889	-2.38613	6.5901	SPTA1;GDNF;IGF1;FGFR4;FGF1
10	Phospholipase C-mediated cascade; FGFR4_Homo sapiens_R-HSA-5654228	1946-02-01	0.0455429	0.479493	0.0452131	0.458889	-1.98698	6.13799	FGFR4;FGF1
11	Stimuli-sensing channels_Homo sapiens_R-HSA-2672351	3/100	0.0381648	0.479493	0.0363103	0.458889	-1.86751	6.09898	TRPV6;CLCA2;CLCA1
12	Netrin-1 signaling_Homo sapiens_R-HSA-373752	1942-02-01	0.0386146	0.479493	0.0386043	0.458889	-1.82897	5.9517	NTN1;NEO1
13	GRB2 events in EGFR signaling_Homo sapiens_R-HSA-179812	4/235	0.0972312	0.479493	0.0887607	0.458889	-2.03235	4.73673	SPTA1;GDNF;FGFR4;FGF1
14	RAF/MAP kinase cascade_Homo sapiens_R-HSA-5673001	4/235	0.0972312	0.479493	0.0887607	0.458889	-2.021	4.71028	SPTA1;GDNF;FGFR4;FGF1
15	SHC1 events in EGFR signaling_Homo sapiens_R-HSA-180336	4/235	0.0972312	0.479493	0.0887607	0.458889	-2.01494	4.69614	SPTA1;GDNF;FGFR4;FGF1
16	FRS-mediated FGFR1 signaling_Homo sapiens_R-HSA-5654693	4/236	0.0983697	0.479493	0.0898051	0.458889	-2.02437	4.69456	SPTA1;GDNF;FGFR4;FGF1
17	FRS-mediated FGFR2 signaling_Homo sapiens_R-HSA-5654700	4/236	0.0983697	0.479493	0.0898051	0.458889	-2.01905	4.68223	SPTA1;GDNF;FGFR4;FGF1
18	SHC1 events in ERBB4 signaling_Homo sapiens_R-HSA-1250347	4/235	0.0972312	0.479493	0.0887607	0.458889	-2.00242	4.66696	SPTA1;GDNF;FGFR4;FGF1
19	FRS-mediated FGFR3 signaling_Homo sapiens_R-HSA-5654706	4/236	0.0983697	0.479493	0.0898051	0.458889	-2.00953	4.66015	SPTA1;GDNF;FGFR4;FGF1
20	SOS-mediated signalling_Homo sapiens_R-HSA-112412	4/235	0.0972312	0.479493	0.0887607	0.458889	-1.99347	4.64611	SPTA1;GDNF;FGFR4;FGF1
21	FRS-mediated FGFR4 signaling_Homo sapiens_R-HSA-5654712	4/236	0.0983697	0.479493	0.0898051	0.458889	-1.99838	4.63429	SPTA1;GDNF;FGFR4;FGF1
22	ARMS-mediated activation_Homo sapiens_R-HSA-170984	4/239	0.101823	0.479493	0.0929743	0.458889	-1.96049	4.47877	SPTA1;GDNF;FGFR4;FGF1
23	Frs2-mediated activation_Homo sapiens_R-HSA-170968	4/240	0.102986	0.479493	0.0940426	0.458889	-1.95053	4.43387	SPTA1;GDNF;FGFR4;FGF1
24	MAPK1/MAPK3 signaling_Homo sapiens_R-HSA-5684996	4/241	0.104155	0.479493	0.0951168	0.458889	-1.95877	4.43048	SPTA1;GDNF;FGFR4;FGF1
25	Signalling to p38 via RIT and RIN_Homo sapiens_R-HSA-187706	4/239	0.101823	0.479493	0.0929743	0.458889	-1.93173	4.41309	SPTA1;GDNF;FGFR4;FGF1
26	Prolonged ERK activation events_Homo sapiens_R-HSA-169893	4/242	0.105331	0.479493	0.0961969	0.458889	-1.94867	4.38578	SPTA1;GDNF;FGFR4;FGF1
27	Constitutive Signaling by Aberrant PI3K in Cancer_Homo sapiens_R-HSA-2219530	1961-02-01	0.075008	0.479493	0.0732145	0.458889	-1.68636	4.36794	FGFR4;FGF1
28	Signaling by Leptin_Homo sapiens_R-HSA-2586552	4/243	0.106513	0.479493	0.0972829	0.458889	-1.92044	4.30081	SPTA1;GDNF;FGFR4;FGF1
29	Interleukin receptor SHC signaling_Homo sapiens_R-HSA-912526	4/245	0.108894	0.479493	0.0994724	0.458889	-1.91023	4.2357	SPTA1;GDNF;FGFR4;FGF1
30	Signalling to RAS_Homo sapiens_R-HSA-167044	4/246	0.110094	0.479493	0.100576	0.458889	-1.91566	4.22675	SPTA1;GDNF;FGFR4;FGF1
31	VEGFR2 mediated cell proliferation_Homo sapiens_R-HSA-5218921	4/248	0.112511	0.479493	0.1028	0.458889	-1.91798	4.19021	SPTA1;GDNF;FGFR4;FGF1
32	Signaling by FGFR in disease_Homo sapiens_R-HSA-1226099	1963-02-01	0.0792996	0.479493	0.0772861	0.458889	-1.61036	4.0815	FGFR4;FGF1
33	O-linked glycosylation of mucins_Homo sapiens_R-HSA-913709	1966-02-01	0.0858765	0.479493	0.0835247	0.458889	-1.64125	4.029	GALNT5;GALNT18
34	Formation of the beta-catenin:TCF transactivating complex_Homo sapiens_R-HSA-201722	1958-02-01	0.0687181	0.479493	0.0672451	0.458889	-1.48359	3.97267	TERT;LEF1
35	Interleukin-2 signaling_Homo sapiens_R-HSA-451927	4/252	0.117416	0.479493	0.107317	0.458889	-1.84631	3.95484	SPTA1;GDNF;FGFR4;FGF1
36	Signalling to ERKs_Homo sapiens_R-HSA-187687	4/253	0.118657	0.479493	0.10846	0.458889	-1.84651	3.93586	SPTA1;GDNF;FGFR4;FGF1
37	Signaling by FGFR2_Homo sapiens_R-HSA-5654738	5/361	0.130345	0.479493	0.116582	0.458889	-1.85725	3.78428	SPTA1;RBFOX2;GDNF;FGFR4;FGF1
38	Interleukin-3, 5 and GM-CSF signaling_Homo sapiens_R-HSA-512988	4/261	0.128787	0.479493	0.117807	0.458889	-1.78134	3.65103	SPTA1;GDNF;FGFR4;FGF1
39	Signaling by PDGF_Homo sapiens_R-HSA-186797	5/364	0.13362	0.479493	0.119572	0.458889	-1.78469	3.59215	SPTA1;GDNF;PDGFD;FGFR4;FGF1
40	Signaling by FGFR_Homo sapiens_R-HSA-190236	5/366	0.135824	0.479493	0.121585	0.458889	-1.78958	3.5727	SPTA1;RBFOX2;GDNF;FGFR4;FGF1
41	NCAM signaling for neurite out-growth_Homo sapiens_R-HSA-375165	4/266	0.135296	0.479493	0.123824	0.458889	-1.71315	3.42679	SPTA1;GDNF;FGFR4;FGF1
42	Developmental Biology_Homo sapiens_R-HSA-1266738	9/786	0.129334	0.479493	0.106334	0.458889	-1.64211	3.3587	SPTA1;EPHA4;GDNF;FGF1;FGFR4;NEO1;NTN1;ANK1;MYH10
43	FGFR1b ligand binding and activation_Homo sapiens_R-HSA-190370	2018-01-06	0.043592	0.479493	0.0485488	0.458889	-1.06876	3.3483	FGF1
44	MAPK family signaling cascades_Homo sapiens_R-HSA-5683057	4/284	0.159793	0.479493	0.146543	0.458889	-1.60565	2.94457	SPTA1;GDNF;FGFR4;FGF1
45	IRS-mediated signalling_Homo sapiens_R-HSA-112399	4/284	0.159793	0.479493	0.146543	0.458889	-1.59342	2.92214	SPTA1;GDNF;FGFR4;FGF1
46	Insulin receptor signalling cascade_Homo sapiens_R-HSA-74751	4/287	0.164027	0.479493	0.150482	0.458889	-1.5585	2.81735	SPTA1;GDNF;FGFR4;FGF1
47	PI3K Cascade_Homo sapiens_R-HSA-109704	1979-02-01	0.116077	0.479493	0.112172	0.458889	-1.29039	2.77885	FGFR4;FGF1
48	PI5P, PP2A and IER3 Regulate PI3K/AKT Signaling_Homo sapiens_R-HSA-6811558	1983-02-01	0.125847	0.479493	0.121444	0.458889	-1.3334	2.76373	FGFR4;FGF1
49	FCERI mediated MAPK activation_Homo sapiens_R-HSA-2871796	4/289	0.166872	0.479493	0.153131	0.458889	-1.53901	2.75564	SPTA1;GDNF;FGFR4;FGF1
50	Signaling by Interleukins_Homo sapiens_R-HSA-449147	5/392	0.165897	0.479493	0.149195	0.458889	-1.51598	2.72328	SPTA1;GDNF;FGF1;FGFR4;IL12RB2
51	FGFR3b ligand binding and activation_Homo sapiens_R-HSA-190371	2018-01-07	0.0506716	0.479493	0.0552922	0.458889	-0.909698	2.71307	FGF1
52	Binding of TCF/LEF:CTNNB1 to target gene promoters_Homo sapiens_R-HSA-4411364	2018-01-07	0.0506716	0.479493	0.0552922	0.458889	-0.89696	2.67508	LEF1
53	Molybdenum cofactor biosynthesis_Homo sapiens_R-HSA-947581	2018-01-06	0.043592	0.479493	0.0485488	0.458889	-0.851899	2.6689	MOCS1
54	COPI-mediated anterograde transport_Homo sapiens_R-HSA-6807878	1978-02-01	0.113667	0.479493	0.109885	0.458889	-1.1955	2.5996	SPTA1;ANK1
55	Vitamin D (calciferol) metabolism_Homo sapiens_R-HSA-196791	2018-01-07	0.0506716	0.479493	0.0552922	0.458889	-0.861191	2.56841	LRP2
56	Negative regulation of the PI3K/AKT network_Homo sapiens_R-HSA-199418	1990-02-01	0.143384	0.479493	0.138101	0.458889	-1.25808	2.44348	FGFR4;FGF1
57	DSCAM interactions_Homo sapiens_R-HSA-376172	2018-01-11	0.078473	0.479493	0.0817985	0.458889	-0.933077	2.37468	NTN1
58	PI3K/AKT Signaling in Cancer_Homo sapiens_R-HSA-2219528	1986-02-01	0.133298	0.479493	0.128519	0.458889	-1.15209	2.32166	FGFR4;FGF1
59	NrCAM interactions_Homo sapiens_R-HSA-447038	2018-01-07	0.0506716	0.479493	0.0552922	0.458889	-0.754881	2.25135	ANK1
60	Signaling by Insulin receptor_Homo sapiens_R-HSA-74752	4/311	0.199271	0.479493	0.183408	0.458889	-1.3683	2.20719	SPTA1;GDNF;FGFR4;FGF1
61	FGFR1c ligand binding and activation_Homo sapiens_R-HSA-190373	2018-01-11	0.078473	0.479493	0.0817985	0.458889	-0.839336	2.13611	FGF1
62	EPH-Ephrin signaling_Homo sapiens_R-HSA-2682334	1995-02-01	0.156208	0.479493	0.150291	0.458889	-1.11973	2.07886	EPHA4;MYH10
63	CHL1 interactions_Homo sapiens_R-HSA-447041	2018-01-09	0.0646749	0.479493	0.0686382	0.458889	-0.75231	2.06011	ANK1
64	FGFR3 ligand binding and activation_Homo sapiens_R-HSA-190239	2018-01-13	0.0920689	0.479493	0.0947758	0.458889	-0.85962	2.05038	FGF1
65	FGFR3 mutant receptor activation_Homo sapiens_R-HSA-2033514	2018-01-12	0.085296	0.479493	0.0883099	0.458889	-0.831153	2.04599	FGF1
66	Erythrocytes take up oxygen and release carbon dioxide_Homo sapiens_R-HSA-1247673	2018-01-08	0.057699	0.479493	0.0619886	0.458889	-0.716797	2.04467	AQP1
67	Class I MHC mediated antigen processing & presentation_Homo sapiens_R-HSA-983169	4/305	0.190246	0.479493	0.174954	0.458889	-1.21899	2.02283	TRIM71;CTSV;KLHL13;RNF220
68	FGFR3c ligand binding and activation_Homo sapiens_R-HSA-190372	2018-01-13	0.0920689	0.479493	0.0947758	0.458889	-0.846312	2.01864	FGF1
69	Signaling by FGFR4 in disease_Homo sapiens_R-HSA-5655291	2018-01-11	0.078473	0.479493	0.0817985	0.458889	-0.784737	1.99716	FGFR4
70	Telomere Extension By Telomerase_Homo sapiens_R-HSA-171319	2018-01-06	0.043592	0.479493	0.0485488	0.458889	-0.637433	1.997	TERT
71	FGFR2b ligand binding and activation_Homo sapiens_R-HSA-190377	2018-01-10	0.0715994	0.479493	0.0752414	0.458889	-0.755362	1.99164	FGF1
72	Neurofascin interactions_Homo sapiens_R-HSA-447043	2018-01-07	0.0506716	0.479493	0.0552922	0.458889	-0.664556	1.98197	ANK1
73	Gastrin-CREB signalling pathway via PKC and MAPK_Homo sapiens_R-HSA-881907	5/432	0.216691	0.479493	0.196352	0.458889	-1.27454	1.94913	SPTA1;PRKCH;GDNF;FGF1;FGFR4
74	Role of second messengers in netrin-1 signaling_Homo sapiens_R-HSA-418890	2018-01-10	0.0715994	0.479493	0.0752414	0.458889	-0.739056	1.94865	NTN1
75	Signaling by activated point mutants of FGFR1_Homo sapiens_R-HSA-1839122	2018-01-11	0.078473	0.479493	0.0817985	0.458889	-0.763311	1.94263	FGF1
76	FGFR2c ligand binding and activation_Homo sapiens_R-HSA-190375	2018-01-13	0.0920689	0.479493	0.0947758	0.458889	-0.807752	1.92666	FGF1
77	VEGFA-VEGFR2 Pathway_Homo sapiens_R-HSA-4420097	4/320	0.213047	0.479493	0.196344	0.458889	-1.23616	1.91141	SPTA1;GDNF;FGFR4;FGF1
78	SHC-related events triggered by IGF1R_Homo sapiens_R-HSA-2428933	2018-01-09	0.0646749	0.479493	0.0686382	0.458889	-0.693622	1.8994	IGF1
79	L1CAM interactions_Homo sapiens_R-HSA-373760	1996-02-01	0.158798	0.479493	0.152756	0.458889	-1.01428	1.8664	SPTA1;ANK1
80	Signaling by SCF-KIT_Homo sapiens_R-HSA-1433557	4/325	0.220814	0.479493	0.203653	0.458889	-1.22438	1.84936	SPTA1;GDNF;FGFR4;FGF1
81	Potassium Channels_Homo sapiens_R-HSA-1296071	1999-02-01	0.166618	0.479493	0.160196	0.458889	-1.01146	1.81259	KCNJ14;KCNMB4
82	Signaling by activated point mutants of FGFR3_Homo sapiens_R-HSA-1839130	2018-01-12	0.085296	0.479493	0.0883099	0.458889	-0.734963	1.80921	FGF1
83	Bicarbonate transporters_Homo sapiens_R-HSA-425381	2018-01-09	0.0646749	0.479493	0.0686382	0.458889	-0.655972	1.7963	SLC4A9
84	Downstream signaling of activated FGFR2_Homo sapiens_R-HSA-5654696	4/329	0.227082	0.479493	0.20956	0.458889	-1.19797	1.77593	SPTA1;GDNF;FGFR4;FGF1
85	Downstream signaling of activated FGFR3_Homo sapiens_R-HSA-5654708	4/329	0.227082	0.479493	0.20956	0.458889	-1.18973	1.76371	SPTA1;GDNF;FGFR4;FGF1
86	Downstream signaling of activated FGFR4_Homo sapiens_R-HSA-5654716	4/329	0.227082	0.479493	0.20956	0.458889	-1.17954	1.74861	SPTA1;GDNF;FGFR4;FGF1
87	Ion channel transport_Homo sapiens_R-HSA-983712	3/203	0.190586	0.479493	0.17884	0.458889	-1.05327	1.74596	TRPV6;CLCA2;CLCA1
88	Signaling by VEGF_Homo sapiens_R-HSA-194138	4/328	0.22551	0.479493	0.208079	0.458889	-1.17052	1.74336	SPTA1;GDNF;FGFR4;FGF1
89	Highly calcium permeable postsynaptic nicotinic acetylcholine receptors_Homo sapiens_R-HSA-629594	2018-01-11	0.078473	0.479493	0.0817985	0.458889	-0.660731	1.68156	CHRNA7
90	Signaling by ERBB4_Homo sapiens_R-HSA-1236394	4/330	0.228656	0.479493	0.211045	0.458889	-1.12871	1.66545	SPTA1;GDNF;FGFR4;FGF1
91	Downstream signaling of activated FGFR1_Homo sapiens_R-HSA-5654687	4/332	0.231813	0.479493	0.214024	0.458889	-1.11165	1.62504	SPTA1;GDNF;FGFR4;FGF1
92	Netrin mediated repulsion signals_Homo sapiens_R-HSA-418886	2018-01-10	0.0715994	0.479493	0.0752414	0.458889	-0.614615	1.62054	NTN1
93	Signaling by FGFR4_Homo sapiens_R-HSA-5654743	4/332	0.231813	0.479493	0.214024	0.458889	-1.10503	1.61536	SPTA1;GDNF;FGFR4;FGF1
94	Signaling by FGFR3_Homo sapiens_R-HSA-5654741	4/333	0.233395	0.479493	0.215518	0.458889	-1.10821	1.61247	SPTA1;GDNF;FGFR4;FGF1
95	Ca2+ activated K+ channels_Homo sapiens_R-HSA-1296052	2018-01-09	0.0646749	0.479493	0.0686382	0.458889	-0.57993	1.58807	KCNMB4
96	O-linked glycosylation_Homo sapiens_R-HSA-5173105	2/110	0.195803	0.479493	0.188007	0.458889	-0.950457	1.54986	GALNT5;GALNT18
97	Signaling by FGFR1_Homo sapiens_R-HSA-5654736	4/336	0.238159	0.479493	0.220018	0.458889	-1.06965	1.53475	SPTA1;GDNF;FGFR4;FGF1
98	Endosomal/Vacuolar pathway_Homo sapiens_R-HSA-1236977	2018-01-12	0.085296	0.479493	0.0883099	0.458889	-0.585814	1.44206	CTSV
99	Downstream signal transduction_Homo sapiens_R-HSA-186763	4/341	0.246149	0.479493	0.227577	0.459242	-1.00001	1.40183	SPTA1;GDNF;FGFR4;FGF1
100	DAP12 signaling_Homo sapiens_R-HSA-2424491	4/344	0.250973	0.484236	0.232145	0.464559	-1.00695	1.39202	SPTA1;GDNF;FGFR4;FGF1
101	PI-3K cascade:FGFR1_Homo sapiens_R-HSA-5654689	2/122	0.228289	0.479493	0.219046	0.458889	-0.870138	1.28532	FGFR4;FGF1
102	PI-3K cascade:FGFR2_Homo sapiens_R-HSA-5654695	2/122	0.228289	0.479493	0.219046	0.458889	-0.86183	1.27304	FGFR4;FGF1
103	PI-3K cascade:FGFR3_Homo sapiens_R-HSA-5654710	2/122	0.228289	0.479493	0.219046	0.458889	-0.852519	1.25929	FGFR4;FGF1
104	PI-3K cascade:FGFR4_Homo sapiens_R-HSA-5654720	2/122	0.228289	0.479493	0.219046	0.458889	-0.844903	1.24804	FGFR4;FGF1
105	PI3K events in ERBB4 signaling_Homo sapiens_R-HSA-1250342	2/122	0.228289	0.479493	0.219046	0.458889	-0.834393	1.23252	FGFR4;FGF1
106	Signaling by EGFR_Homo sapiens_R-HSA-177929	4/355	0.268824	0.487226	0.249091	0.471627	-0.930802	1.22279	SPTA1;GDNF;FGFR4;FGF1
107	PIP3 activates AKT signaling_Homo sapiens_R-HSA-1257604	2/122	0.228289	0.479493	0.219046	0.458889	-0.827633	1.22253	FGFR4;FGF1
108	GAB1 signalosome_Homo sapiens_R-HSA-180292	2/125	0.236476	0.479493	0.226883	0.459242	-0.822245	1.1856	FGFR4;FGF1
109	PI3K/AKT activation_Homo sapiens_R-HSA-198203	2/125	0.236476	0.479493	0.226883	0.459242	-0.804869	1.16055	FGFR4;FGF1
110	FGFR1 ligand binding and activation_Homo sapiens_R-HSA-190242	2018-01-15	0.105466	0.479493	0.107572	0.458889	-0.50035	1.12547	FGF1
111	DAP12 interactions_Homo sapiens_R-HSA-2172127	4/359	0.275374	0.487226	0.255324	0.478022	-0.870585	1.12273	SPTA1;GDNF;FGFR4;FGF1
112	Erythrocytes take up carbon dioxide and release oxygen_Homo sapiens_R-HSA-1237044	2018-01-12	0.085296	0.479493	0.0883099	0.458889	-0.451388	1.11115	AQP1
113	RNA Polymerase II Transcription_Homo sapiens_R-HSA-73857	2/124	0.233745	0.479493	0.224268	0.459242	-0.71579	1.04042	U2AF1;TAF4
114	NGF signalling via TRKA from the plasma membrane_Homo sapiens_R-HSA-187037	4/374	0.300156	0.500807	0.27898	0.482134	-0.755984	0.90979	SPTA1;GDNF;FGFR4;FGF1
115	O2/CO2 exchange in erythrocytes_Homo sapiens_R-HSA-1480926	2018-01-12	0.085296	0.479493	0.0883099	0.458889	-0.36919	0.908809	AQP1
116	SHC-mediated cascade:FGFR3_Homo sapiens_R-HSA-5654704	2018-01-18	0.125193	0.479493	0.126434	0.458889	-0.425362	0.883858	FGF1
117	Activated point mutants of FGFR2_Homo sapiens_R-HSA-2033519	2018-01-17	0.118666	0.479493	0.120191	0.458889	-0.406358	0.866128	FGF1
118	Cell-Cell communication_Homo sapiens_R-HSA-1500931	2/131	0.252895	0.484236	0.242618	0.464559	-0.622099	0.85525	CDH10;NTN1
119	Transmembrane transport of small molecules_Homo sapiens_R-HSA-382551	6/594	0.277381	0.487226	0.250043	0.471627	-0.66304	0.850258	SLC44A3;SLC4A9;TRPV6;CLCA2;CLCA1;AQP1
120	mRNA Splicing - Major Pathway_Homo sapiens_R-HSA-72163	2/134	0.261117	0.487226	0.250508	0.471627	-0.600226	0.805977	FUS;U2AF1
121	ER to Golgi Anterograde Transport_Homo sapiens_R-HSA-199977	2/131	0.252895	0.484236	0.242618	0.464559	-0.569254	0.7826	SPTA1;ANK1
122	Passive transport by Aquaporins_Homo sapiens_R-HSA-432047	2018-01-12	0.085296	0.479493	0.0883099	0.458889	-0.308756	0.760042	AQP1
123	Cytokine Signaling in Immune system_Homo sapiens_R-HSA-1280215	6/620	0.31074	0.50896	0.281739	0.483277	-0.590095	0.689702	SPTA1;GDNF;FGF1;FGFR4;EDA2R;IL12RB2
124	Signaling by FGFR3 in disease_Homo sapiens_R-HSA-5655332	2018-01-22	0.150826	0.479493	0.150974	0.458889	-0.364311	0.689139	FGF1
125	Antigen processing: Ubiquitination & Proteasome degradation_Homo sapiens_R-HSA-983168	3/260	0.302533	0.502234	0.28545	0.483277	-0.566037	0.676735	TRIM71;KLHL13;RNF220
126	Fc epsilon receptor (FCERI) signaling_Homo sapiens_R-HSA-2454202	4/395	0.33526	0.52899	0.312684	0.499405	-0.600454	0.656206	SPTA1;GDNF;FGF1;FGFR4
127	SHC-mediated cascade:FGFR1_Homo sapiens_R-HSA-5654688	2018-01-21	0.144489	0.479493	0.144903	0.458889	-0.33586	0.649738	FGF1
128	Trafficking and processing of endosomal TLR_Homo sapiens_R-HSA-1679131	2018-01-13	0.0920689	0.479493	0.0947758	0.458889	-0.271362	0.647257	CTSV
129	Signaling by FGFR3 point mutants in cancer_Homo sapiens_R-HSA-8853338	2018-01-22	0.150826	0.479493	0.150974	0.458889	-0.339304	0.641837	FGF1
130	mRNA Splicing_Homo sapiens_R-HSA-72172	2/144	0.288521	0.500642	0.276852	0.480924	-0.484716	0.602495	FUS;U2AF1
131	Acetylcholine Binding And Downstream Events_Homo sapiens_R-HSA-181431	2018-01-14	0.098792	0.479493	0.101197	0.458889	-0.244346	0.565597	CHRNA7
132	Adaptive Immune System_Homo sapiens_R-HSA-1280218	7/762	0.334509	0.52899	0.301092	0.492562	-0.4927	0.539551	TRIM71;CTSV;KLHL13;FGF1;FGFR4;CD34;RNF220
133	Metabolism of vitamins and cofactors_Homo sapiens_R-HSA-196854	2/148	0.29946	0.500807	0.287388	0.483277	-0.439744	0.530232	LRP2;MOCS1
134	FGFR2 ligand binding and activation_Homo sapiens_R-HSA-190241	2018-01-20	0.138104	0.479493	0.13879	0.458889	-0.263867	0.52239	FGF1
135	SHC-mediated cascade:FGFR2_Homo sapiens_R-HSA-5654699	2018-01-26	0.175713	0.479493	0.174835	0.458889	-0.292913	0.509347	FGF1
136	Role of LAT2/NTAL/LAB on calcium mobilization_Homo sapiens_R-HSA-2730905	2/162	0.337486	0.52899	0.324113	0.508392	-0.448124	0.486766	FGFR4;FGF1
137	Negative regulation of FGFR3 signaling_Homo sapiens_R-HSA-5654732	2018-01-29	0.193902	0.479493	0.192296	0.458889	-0.255511	0.419141	FGF1
138	Activation of Nicotinic Acetylcholine Receptors_Homo sapiens_R-HSA-629602	2018-01-14	0.098792	0.479493	0.101197	0.458889	-0.179936	0.416505	CHRNA7
139	RHO GTPases activate CIT_Homo sapiens_R-HSA-5625900	2018-01-16	0.11209	0.479493	0.113904	0.458889	-0.173032	0.378673	MYH10
140	Neuronal System_Homo sapiens_R-HSA-112316	3/301	0.385294	0.574531	0.36544	0.547348	-0.390906	0.372826	CHRNA7;KCNJ14;KCNMB4
141	Negative regulation of FGFR1 signaling_Homo sapiens_R-HSA-5654726	1932-01-01	0.211691	0.479493	0.209394	0.458889	-0.236337	0.366943	FGF1
142	Transport to the Golgi and subsequent modification_Homo sapiens_R-HSA-948021	2/162	0.337486	0.52899	0.324113	0.508392	-0.331549	0.360138	SPTA1;ANK1
143	Downstream signaling events of B Cell Receptor (BCR)_Homo sapiens_R-HSA-1168372	2/192	0.416549	0.601019	0.400974	0.578599	-0.386798	0.338739	FGFR4;FGF1
144	DCC mediated attractive signaling_Homo sapiens_R-HSA-418885	2018-01-14	0.098792	0.479493	0.101197	0.458889	-0.144399	0.334245	NTN1
145	Negative regulation of FGFR2 signaling_Homo sapiens_R-HSA-5654727	1934-01-01	0.223334	0.479493	0.220594	0.458889	-0.217833	0.326551	FGF1
146	RHO GTPases Activate ROCKs_Homo sapiens_R-HSA-5627117	2018-01-17	0.118666	0.479493	0.120191	0.458889	-0.141324	0.301224	MYH10
147	Signalling by NGF_Homo sapiens_R-HSA-166520	4/450	0.427357	0.607676	0.402205	0.578599	-0.351112	0.298493	SPTA1;GDNF;FGF1;FGFR4
148	Postsynaptic nicotinic acetylcholine receptors_Homo sapiens_R-HSA-622327	2018-01-14	0.098792	0.479493	0.101197	0.458889	-0.120847	0.279729	CHRNA7
149	Processing of Capped Intron-Containing Pre-mRNA_Homo sapiens_R-HSA-72203	2/193	0.419108	0.601019	0.403474	0.578599	-0.239327	0.208125	FUS;U2AF1
150	TCF dependent signaling in response to WNT_Homo sapiens_R-HSA-201681	2/199	0.434343	0.609891	0.418371	0.589921	-0.216196	0.18029	TERT;LEF1
151	FGFR2 mutant receptor activation_Homo sapiens_R-HSA-1839126	1933-01-01	0.217534	0.479493	0.215013	0.458889	-0.093274	0.14228	FGF1
152	RHO GTPases activate PAKs_Homo sapiens_R-HSA-5627123	2018-01-21	0.144489	0.479493	0.144903	0.458889	-0.065541	0.126792	MYH10
153	Signal Transduction_Homo sapiens_R-HSA-162582	19/2465	0.461741	0.621649	0.391877	0.571699	-0.138535	0.107053	GLP1R;OR2B2;PRKCH;RBFOX2;LEF1;IGF1;LRP2;KIF7;FGF1;CHRDL1;SPTA1;DIAPH3;TERT;GDNF;PDGFD;RHOJ;FGFR4;MYH10;OXGR1
154	Oncogene Induced Senescence_Homo sapiens_R-HSA-2559585	1932-01-01	0.211691	0.479493	0.209394	0.458889	-0.0571684	0.0887612	CDK6
155	Inwardly rectifying K+ channels_Homo sapiens_R-HSA-1296065	2018-01-31	0.205805	0.479493	0.203734	0.458889	-0.0463919	0.0733375	KCNJ14
156	CDO in myogenesis_Homo sapiens_R-HSA-375170	2018-01-29	0.193902	0.479493	0.192296	0.458889	-0.0399002	0.0654525	NEO1
157	Signaling by Rho GTPases_Homo sapiens_R-HSA-194315	3/367	0.512494	0.650933	0.490429	0.62842	-0.0906658	0.0606071	DIAPH3;RHOJ;MYH10
158	Immune System_Homo sapiens_R-HSA-168256	12/1547	0.476315	0.622661	0.425674	0.592078	-0.0632068	0.0468789	TRIM71;SPTA1;GDNF;CTSV;KLHL13;DEFB108B;FGF1;FGFR4;CD34;EDA2R;RNF220;IL12RB2
159	Signaling by the B Cell Receptor (BCR)_Homo sapiens_R-HSA-983705	2/233	0.516356	0.650933	0.49906	0.634653	-0.0571068	0.0377452	FGFR4;FGF1
160	Myogenesis_Homo sapiens_R-HSA-525793	2018-01-29	0.193902	0.479493	0.192296	0.458889	-0.0196374	0.0322133	NEO1
161	Post-translational protein modification_Homo sapiens_R-HSA-597592	4/521	0.540698	0.664783	0.514584	0.639907	-0.0232289	0.0142833	SPTA1;GALNT5;GALNT18;ANK1
162	Extension of Telomeres_Homo sapiens_R-HSA-180786	2018-01-28	0.187883	0.479493	0.186517	0.458889	-0.00747383	0.0124957	TERT
163	Synthesis, secretion, and deacylation of Ghrelin_Homo sapiens_R-HSA-422085	2018-01-17	0.118666	0.479493	0.120191	0.458889	-0.00233981	0.00498716	IGF1
164	cGMP effects_Homo sapiens_R-HSA-418457	2018-01-18	0.125193	0.479493	0.126434	0.458889	0.00156003	-0.00324157	KCNMB4
165	FGFR1 mutant receptor activation_Homo sapiens_R-HSA-1839124	2018-01-31	0.205805	0.479493	0.203734	0.458889	0.00810015	-0.0128049	FGF1
166	Cell Cycle, Mitotic_Homo sapiens_R-HSA-69278	1/462	0.96894	0.96894	0.965886	0.965886	0.566779	-0.0178834	CDK6
167	Signaling by FGFR2 IIIa TM_Homo sapiens_R-HSA-8851708	2018-01-19	0.131673	0.479493	0.132634	0.458889	0.00919986	-0.0186521	FGF1
168	Metabolism of lipids and lipoproteins_Homo sapiens_R-HSA-556833	2/659	0.958086	0.963806	0.953693	0.959387	0.437908	-0.01875	SLC44A3;LIPI
169	Gene Expression_Homo sapiens_R-HSA-74160	7/1631	0.962472	0.965337	0.959136	0.961991	0.562866	-0.0215297	APOBEC1;ZNF519;FUS;SESN1;TWISTNB;U2AF1;TAF4
170	Olfactory Signaling Pathway_Homo sapiens_R-HSA-381753	1/418	0.956615	0.963806	0.952605	0.959387	0.512642	-0.0227377	OR2B2
171	RHO GTPase Effectors_Homo sapiens_R-HSA-195258	2/255	0.565107	0.675323	0.547441	0.654708	0.0404077	-0.0230623	DIAPH3;MYH10
172	Metabolism_Homo sapiens_R-HSA-1430728	1908-09-01	0.95054	0.961958	0.946391	0.957759	0.503454	-0.0255378	GLP1R;SLC44A3;AOC2;LIPI;LRP2;MOCS1;LDHAL6A;HS6ST2;AQP1
173	Generic Transcription Pathway_Homo sapiens_R-HSA-212436	3/812	0.942671	0.956868	0.936556	0.950661	0.43374	-0.0256072	ZNF519;SESN1;TAF4
174	GPCR downstream signaling_Homo sapiens_R-HSA-388396	4/983	0.936817	0.953798	0.929953	0.94681	0.467971	-0.0305433	OR2B2;GLP1R;PRKCH;OXGR1
175	Degradation of beta-catenin by the destruction complex_Homo sapiens_R-HSA-195253	1982-01-01	0.456811	0.621649	0.447112	0.606051	0.0424004	-0.0332201	LEF1
176	Sema4D induced cell migration and growth-cone collapse_Homo sapiens_R-HSA-416572	2018-01-24	0.163362	0.479493	0.162988	0.458889	0.0193431	-0.0350457	MYH10
177	Infectious disease_Homo sapiens_R-HSA-5663205	1/348	0.926285	0.945933	0.92031	0.939832	0.472021	-0.0361443	TAF4
178	Class A/1 (Rhodopsin-like receptors)_Homo sapiens_R-HSA-373076	1/323	0.910961	0.935957	0.904157	0.928966	0.401425	-0.0374348	OXGR1
179	Cell Cycle_Homo sapiens_R-HSA-1640170	2/566	0.924897	0.945933	0.91769	0.939832	0.494328	-0.0385935	CDK6;TERT
180	Asparagine N-linked glycosylation_Homo sapiens_R-HSA-446203	2/259	0.573587	0.68039	0.55589	0.661961	0.0781152	-0.04342	SPTA1;ANK1
181	Innate Immune System_Homo sapiens_R-HSA-168249	6/807	0.553587	0.671075	0.521032	0.640888	0.0778549	-0.0460384	SPTA1;GDNF;CTSV;DEFB108B;FGF1;FGFR4
182	Metabolism of carbohydrates_Homo sapiens_R-HSA-71387	1/282	0.878698	0.912077	0.870426	0.902713	0.383625	-0.0496083	HS6ST2
183	GPCR ligand binding_Homo sapiens_R-HSA-500792	2/447	0.846516	0.883208	0.834421	0.870587	0.300742	-0.0501114	GLP1R;OXGR1
184	DNA Repair_Homo sapiens_R-HSA-73894	1/285	0.881409	0.912077	0.873248	0.902713	0.407346	-0.0514209	POLN
185	Disease_Homo sapiens_R-HSA-1643685	3/725	0.907862	0.935625	0.898581	0.92606	0.532763	-0.0514983	FGF1;FGFR4;TAF4
186	Platelet activation, signaling and aggregation_Homo sapiens_R-HSA-76002	2/253	0.560823	0.672588	0.543176	0.654708	0.0941186	-0.0544335	PRKCH;IGF1
187	Vesicle-mediated transport_Homo sapiens_R-HSA-5653656	2/492	0.882306	0.912077	0.872183	0.902713	0.437684	-0.0548052	SPTA1;ANK1
188	Diseases of signal transduction_Homo sapiens_R-HSA-5663202	2/288	0.631474	0.727786	0.613852	0.708453	0.130583	-0.0600288	FGFR4;FGF1
189	Extracellular matrix organization_Homo sapiens_R-HSA-1474244	2/283	0.621944	0.720258	0.604274	0.699795	0.131953	-0.062665	FBLN1;CTSV
190	Surfactant metabolism_Homo sapiens_R-HSA-5683826	2018-01-29	0.193902	0.479493	0.192296	0.458889	0.0390645	-0.0640816	PGA5
191	Signaling by FGFR2 in disease_Homo sapiens_R-HSA-5655253	1943-01-01	0.273648	0.487226	0.26909	0.478945	0.0496932	-0.0643981	FGF1
192	FGFR2 alternative splicing_Homo sapiens_R-HSA-6803529	2018-01-26	0.175713	0.479493	0.174835	0.458889	0.038846	-0.0675494	RBFOX2
193	Signaling by Wnt_Homo sapiens_R-HSA-195721	2/295	0.644503	0.733547	0.626969	0.713813	0.168404	-0.0739758	TERT;LEF1
194	Chromatin modifying enzymes_Homo sapiens_R-HSA-3247509	1/226	0.815142	0.858447	0.804838	0.847526	0.382355	-0.0781507	JADE1
195	G alpha (i) signalling events_Homo sapiens_R-HSA-418594	1/240	0.833603	0.872436	0.823789	0.862164	0.434253	-0.079033	OXGR1
196	Chromatin organization_Homo sapiens_R-HSA-4839726	1/226	0.815142	0.858447	0.804838	0.847526	0.390904	-0.079898	JADE1
197	Membrane Trafficking_Homo sapiens_R-HSA-199991	2/420	0.820585	0.861486	0.807288	0.847526	0.410217	-0.0811155	SPTA1;ANK1
198	Cellular responses to stress_Homo sapiens_R-HSA-2262752	2/367	0.758178	0.817847	0.742665	0.802173	0.296648	-0.0821232	CDK6;NOX5
199	Sema4D in semaphorin signaling_Homo sapiens_R-HSA-400685	2018-01-27	0.181821	0.479493	0.180696	0.458889	0.0481932	-0.0821565	MYH10
200	Transcriptional Regulation by TP53_Homo sapiens_R-HSA-3700989	2/348	0.731636	0.797933	0.715435	0.780264	0.265925	-0.0830942	SESN1;TAF4
201	SLC-mediated transmembrane transport_Homo sapiens_R-HSA-425407	2/268	0.592228	0.695084	0.5745	0.674587	0.160649	-0.0841584	SLC44A3;SLC4A9
202	Organelle biogenesis and maintenance_Homo sapiens_R-HSA-1852241	2/326	0.697883	0.764819	0.681005	0.749996	0.241606	-0.0869068	NPHP1;MRPS6
203	Antigen processing-Cross presentation_Homo sapiens_R-HSA-1236975	1982-01-01	0.456811	0.621649	0.447112	0.606051	0.115061	-0.0901489	CTSV
204	Repression of WNT target genes_Homo sapiens_R-HSA-4641265	2018-01-14	0.098792	0.479493	0.101197	0.458889	0.0402965	-0.0932759	LEF1
205	Signaling by GPCR_Homo sapiens_R-HSA-372790	8/1293	0.748056	0.813209	0.720679	0.783448	0.324542	-0.0942073	SPTA1;OR2B2;GLP1R;PRKCH;GDNF;FGF1;FGFR4;OXGR1
206	Cyclin D associated events in G1_Homo sapiens_R-HSA-69231	1938-01-01	0.246109	0.479493	0.242527	0.464559	0.0672754	-0.0943186	CDK6
207	Hemostasis_Homo sapiens_R-HSA-109582	3/552	0.779223	0.831007	0.761795	0.81312	0.378724	-0.0944756	PRKCH;KCNMB4;IGF1
208	HIV Infection_Homo sapiens_R-HSA-162906	1/222	0.809503	0.85787	0.799064	0.846807	0.450467	-0.0951992	TAF4
209	Transmission across Chemical Synapses_Homo sapiens_R-HSA-112315	1/211	0.793101	0.843139	0.782305	0.831661	0.432586	-0.100276	CHRNA7
210	Biological oxidations_Homo sapiens_R-HSA-211859	1/199	0.773604	0.827633	0.762451	0.81312	0.3943	-0.101215	AOC2
211	Signaling by Hedgehog_Homo sapiens_R-HSA-5358351	1/136	0.637082	0.727786	0.625106	0.713813	0.225279	-0.101568	KIF7
212	Metabolism of proteins_Homo sapiens_R-HSA-392499	7/1074	0.68774	0.762231	0.657622	0.733837	0.280663	-0.105065	SPTA1;GALNT5;GALNT18;IGF1;SNCAIP;ANK1;PGA5
213	G alpha (q) signalling events_Homo sapiens_R-HSA-416476	1/191	0.759603	0.817847	0.748236	0.805608	0.396648	-0.109062	PRKCH
214	Muscle contraction_Homo sapiens_R-HSA-397014	1/196	0.768451	0.824739	0.757215	0.81268	0.417185	-0.109878	KCNJ14
215	TNFR2 non-canonical NF-kB pathway_Homo sapiens_R-HSA-5668541	1995-01-01	0.507019	0.649678	0.496371	0.633625	0.166942	-0.113389	EDA2R
216	Hedgehog 'on' state_Homo sapiens_R-HSA-5632684	1985-01-01	0.46883	0.622031	0.458884	0.606447	0.151875	-0.115048	KIF7
217	G1 Phase_Homo sapiens_R-HSA-69236	1938-01-01	0.246109	0.479493	0.242527	0.464559	0.0830373	-0.116417	CDK6
218	Hedgehog 'off' state_Homo sapiens_R-HSA-5610787	1999-01-01	0.521519	0.650933	0.510639	0.637353	0.187508	-0.12207	KIF7
219	Assembly of the primary cilium_Homo sapiens_R-HSA-5617833	1/187	0.752283	0.815175	0.740817	0.802173	0.429363	-0.122215	NPHP1
220	Mitotic G1-G1/S phases_Homo sapiens_R-HSA-453279	1/136	0.637082	0.727786	0.625106	0.713813	0.27927	-0.125911	CDK6
221	Beta-catenin independent WNT signaling_Homo sapiens_R-HSA-3858494	1/144	0.658162	0.736879	0.646146	0.723426	0.301765	-0.12623	LEF1
222	Toll-Like Receptors Cascades_Homo sapiens_R-HSA-168898	1/140	0.647779	0.733547	0.635776	0.720054	0.308371	-0.133897	CTSV
223	Integration of energy metabolism_Homo sapiens_R-HSA-163685	1/110	0.559247	0.672588	0.547857	0.654708	0.237624	-0.138099	GLP1R
224	Oxidative Stress Induced Senescence_Homo sapiens_R-HSA-2559580	1991-01-01	0.492082	0.63537	0.481693	0.621956	0.194934	-0.138229	CDK6
225	Cellular Senescence_Homo sapiens_R-HSA-2559583	1/161	0.699004	0.764819	0.687072	0.751764	0.389469	-0.139469	CDK6
226	Regulation of TP53 Activity_Homo sapiens_R-HSA-5633007	1/151	0.675606	0.753905	0.6636	0.738063	0.370048	-0.145112	TAF4
227	Mitochondrial translation elongation_Homo sapiens_R-HSA-5389840	1984-01-01	0.464853	0.621649	0.454988	0.606051	0.192224	-0.14725	MRPS6
228	Phospholipid metabolism_Homo sapiens_R-HSA-1483257	1/161	0.699004	0.764819	0.687072	0.751764	0.415681	-0.148855	SLC44A3
229	G alpha (s) signalling events_Homo sapiens_R-HSA-418555	1/142	0.653009	0.733547	0.640998	0.720054	0.350938	-0.149557	GLP1R
230	Immunoregulatory interactions between a Lymphoid and a non-Lymphoid cell_Homo sapiens_R-HSA-198933	1/157	0.689853	0.762231	0.677883	0.749005	0.406039	-0.150753	CD34
231	HATs acetylate histones_Homo sapiens_R-HSA-3214847	1/107	0.54926	0.668234	0.537992	0.652171	0.252033	-0.151014	JADE1
232	RNA Polymerase I Transcription Termination_Homo sapiens_R-HSA-73863	1932-01-01	0.211691	0.479493	0.209394	0.458889	0.0977324	-0.151742	TWISTNB
233	The citric acid (TCA) cycle and respiratory electron transport_Homo sapiens_R-HSA-1428517	1/153	0.680426	0.756777	0.668429	0.740989	0.395444	-0.15226	LDHAL6A
234	Neurotransmitter Receptor Binding And Downstream Transmission In The Postsynaptic Cell_Homo sapiens_R-HSA-112314	1/142	0.653009	0.733547	0.640998	0.720054	0.358342	-0.152712	CHRNA7
235	HIV Life Cycle_Homo sapiens_R-HSA-162587	1/141	0.650404	0.733547	0.638396	0.720054	0.359542	-0.154661	TAF4
236	Mitochondrial translation_Homo sapiens_R-HSA-5368287	1990-01-01	0.488278	0.632883	0.477959	0.619508	0.217103	-0.155634	MRPS6
237	Glucagon-type ligand receptors_Homo sapiens_R-HSA-420092	2018-01-30	0.199875	0.479493	0.198035	0.458889	0.0970078	-0.156189	GLP1R
238	Senescence-Associated Secretory Phenotype (SASP)_Homo sapiens_R-HSA-2559582	1977-01-01	0.436175	0.609922	0.426929	0.592078	0.20559	-0.17058	CDK6
239	RHO GTPases Activate Formins_Homo sapiens_R-HSA-5663220	1/114	0.57222	0.68039	0.560688	0.665323	0.306616	-0.171162	DIAPH3
240	Late Phase of HIV Life Cycle_Homo sapiens_R-HSA-162599	1/128	0.614712	0.714338	0.602836	0.699795	0.353624	-0.172074	TAF4
241	Mitochondrial translation initiation_Homo sapiens_R-HSA-5368286	1984-01-01	0.464853	0.621649	0.454988	0.606051	0.225772	-0.172949	MRPS6
242	Fanconi Anemia Pathway_Homo sapiens_R-HSA-6783310	1935-01-01	0.229091	0.479493	0.226135	0.459242	0.119495	-0.176093	POLN
243	Glycosaminoglycan metabolism_Homo sapiens_R-HSA-1630316	1/121	0.594018	0.695084	0.582285	0.681354	0.339311	-0.176729	HS6ST2
244	RNA Polymerase I Transcription_Homo sapiens_R-HSA-73864	1979-01-01	0.444521	0.619024	0.435087	0.60092	0.220562	-0.178822	TWISTNB
245	Digestion of dietary lipid_Homo sapiens_R-HSA-192456	2018-01-17	0.118666	0.479493	0.120191	0.458889	0.084032	-0.179109	LIPI
246	Cardiac conduction_Homo sapiens_R-HSA-5576891	1/135	0.634358	0.727786	0.622391	0.713813	0.395657	-0.18008	KCNJ14
247	Chromosome Maintenance_Homo sapiens_R-HSA-73886	1986-01-01	0.472778	0.622367	0.462753	0.606801	0.240433	-0.180116	TERT
248	RNA Polymerase I Promoter Escape_Homo sapiens_R-HSA-73772	2018-01-30	0.199875	0.479493	0.198035	0.458889	0.112409	-0.180985	TWISTNB
249	Epigenetic regulation of gene expression_Homo sapiens_R-HSA-212165	1/115	0.575404	0.68039	0.563839	0.666715	0.328844	-0.181746	TWISTNB
250	Class B/2 (Secretin family receptors)_Homo sapiens_R-HSA-373080	1984-01-01	0.464853	0.621649	0.454988	0.606051	0.239226	-0.183255	GLP1R
251	Degradation of the extracellular matrix_Homo sapiens_R-HSA-1474228	1/106	0.545882	0.66653	0.534657	0.650468	0.305723	-0.18507	CTSV
252	Mitochondrial translation termination_Homo sapiens_R-HSA-5419276	1984-01-01	0.464853	0.621649	0.454988	0.606051	0.242966	-0.18612	MRPS6
253	Regulation of insulin secretion_Homo sapiens_R-HSA-422356	1980-01-01	0.448648	0.621649	0.439124	0.604019	0.233442	-0.187108	GLP1R
254	RNA Polymerase II Pre-transcription Events_Homo sapiens_R-HSA-674695	1964-01-01	0.378807	0.567369	0.370996	0.55321	0.197616	-0.191831	TAF4
255	Phase 4 - resting membrane potential_Homo sapiens_R-HSA-5576886	2018-01-19	0.131673	0.479493	0.132634	0.458889	0.0946649	-0.191927	KCNJ14
256	MHC class II antigen presentation_Homo sapiens_R-HSA-2132295	1/103	0.535595	0.661156	0.524509	0.642762	0.308353	-0.192528	CTSV
257	RNA Polymerase I, RNA Polymerase III, and Mitochondrial Transcription_Homo sapiens_R-HSA-504046	1/116	0.578564	0.681735	0.566968	0.668071	0.354889	-0.194197	TWISTNB
258	Transcription of the HIV genome_Homo sapiens_R-HSA-167172	1967-01-01	0.39254	0.580202	0.384362	0.568114	0.207878	-0.19439	TAF4
259	NoRC negatively regulates rRNA expression_Homo sapiens_R-HSA-427413	1973-01-01	0.419108	0.601019	0.410261	0.583367	0.228638	-0.19883	TWISTNB
260	RNA Polymerase I Promoter Clearance_Homo sapiens_R-HSA-73854	1976-01-01	0.431956	0.609076	0.422806	0.591226	0.241244	-0.202507	TWISTNB
261	HS-GAG biosynthesis_Homo sapiens_R-HSA-2022928	2018-01-31	0.205805	0.479493	0.203734	0.458889	0.128845	-0.203682	HS6ST2
262	Negative epigenetic regulation of rRNA expression_Homo sapiens_R-HSA-5250941	1976-01-01	0.431956	0.609076	0.422806	0.591226	0.242831	-0.20384	TWISTNB
263	Glycerophospholipid biosynthesis_Homo sapiens_R-HSA-1483206	1/102	0.532115	0.659275	0.521078	0.640888	0.326991	-0.206297	SLC44A3
264	Detoxification of Reactive Oxygen Species_Homo sapiens_R-HSA-3299685	1933-01-01	0.217534	0.479493	0.215013	0.458889	0.136472	-0.208174	NOX5
265	Platelet homeostasis_Homo sapiens_R-HSA-418346	1987-01-01	0.476696	0.622661	0.466595	0.609467	0.281111	-0.208268	KCNMB4
266	Effects of PIP2 hydrolysis_Homo sapiens_R-HSA-114508	2018-01-27	0.181821	0.479493	0.180696	0.458889	0.122715	-0.209196	PRKCH
267	Response to elevated platelet cytosolic Ca2+_Homo sapiens_R-HSA-76005	1/110	0.559247	0.672588	0.547857	0.654708	0.363543	-0.211278	IGF1
268	Phase 1 - Functionalization of compounds_Homo sapiens_R-HSA-211945	1992-01-01	0.495858	0.637802	0.485402	0.624353	0.301231	-0.211304	AOC2
269	Transport of inorganic cations/anions and amino acids/oligopeptides_Homo sapiens_R-HSA-425393	1999-01-01	0.521519	0.650933	0.510639	0.637353	0.324962	-0.211554	SLC4A9
270	Pyruvate metabolism_Homo sapiens_R-HSA-70268	2018-01-27	0.181821	0.479493	0.180696	0.458889	0.124332	-0.211953	LDHAL6A
271	Platelet degranulation_Homo sapiens_R-HSA-114608	1/105	0.542479	0.664783	0.531299	0.648723	0.354123	-0.216584	IGF1
272	Collagen formation_Homo sapiens_R-HSA-1474290	1985-01-01	0.46883	0.622031	0.458884	0.606447	0.289451	-0.219263	CTSV
273	Peptide hormone metabolism_Homo sapiens_R-HSA-2980736	1981-01-01	0.452745	0.621649	0.443132	0.606051	0.278807	-0.220934	IGF1
274	Positive epigenetic regulation of rRNA expression_Homo sapiens_R-HSA-5250913	1973-01-01	0.419108	0.601019	0.410261	0.583367	0.254573	-0.221383	TWISTNB
275	Transport of glucose and other sugars, bile salts and organic acids, metal ions and amine compounds_Homo sapiens_R-HSA-425366	1/101	0.528609	0.657348	0.517623	0.640888	0.349251	-0.222649	SLC44A3
276	Ca2+ pathway_Homo sapiens_R-HSA-4086398	1961-01-01	0.364766	0.548778	0.357344	0.537611	0.222064	-0.223951	LEF1
277	TP53 Regulates Metabolic Genes_Homo sapiens_R-HSA-5628897	1984-01-01	0.464853	0.621649	0.454988	0.606051	0.299637	-0.229532	SESN1
278	TNFs bind their physiological receptors_Homo sapiens_R-HSA-5669034	2018-01-24	0.163362	0.479493	0.162988	0.458889	0.126916	-0.229945	EDA2R
279	Rho GTPase cycle_Homo sapiens_R-HSA-194840	1/122	0.597041	0.696203	0.585284	0.682494	0.445949	-0.230007	RHOJ
280	Anchoring of the basal body to the plasma membrane_Homo sapiens_R-HSA-5620912	1997-01-01	0.514322	0.650933	0.503555	0.635574	0.349378	-0.232303	NPHP1
281	Metabolism of water-soluble vitamins and cofactors_Homo sapiens_R-HSA-196849	1998-01-01	0.517934	0.650933	0.50711	0.637353	0.354153	-0.233	MOCS1
282	Transport of Mature mRNA derived from an Intron-Containing Transcript_Homo sapiens_R-HSA-159236	1968-01-01	0.397051	0.581766	0.388755	0.569611	0.252368	-0.23311	U2AF1
283	Signaling by BMP_Homo sapiens_R-HSA-201451	2018-01-23	0.157117	0.479493	0.157002	0.458889	0.127398	-0.235783	CHRDL1
284	Regulation of TP53 Activity through Phosphorylation_Homo sapiens_R-HSA-6804756	1989-01-01	0.484446	0.630341	0.474197	0.617006	0.328246	-0.237896	TAF4
285	Amine compound SLC transporters_Homo sapiens_R-HSA-425428	2018-01-30	0.199875	0.479493	0.198035	0.458889	0.147863	-0.238068	SLC44A3
286	Visual phototransduction_Homo sapiens_R-HSA-2187338	1997-01-01	0.514322	0.650933	0.503555	0.635574	0.358407	-0.238307	LRP2
287	Transport of Mature Transcript to Cytoplasm_Homo sapiens_R-HSA-72202	1974-01-01	0.423422	0.604633	0.414472	0.586879	0.28621	-0.245965	U2AF1
288	Amyloid fiber formation_Homo sapiens_R-HSA-977225	1968-01-01	0.397051	0.581766	0.388755	0.569611	0.267631	-0.247209	SNCAIP
289	Cell junction organization_Homo sapiens_R-HSA-446728	1986-01-01	0.472778	0.622367	0.462753	0.606801	0.339382	-0.254241	CDH10
290	Phospholipase C-mediated cascade; FGFR3_Homo sapiens_R-HSA-5654227	1944-01-01	0.279034	0.487226	0.274292	0.478945	0.207733	-0.265154	FGF1
291	Signaling by FGFR1 in disease_Homo sapiens_R-HSA-5655302	1938-01-01	0.246109	0.479493	0.242527	0.464559	0.191124	-0.267951	FGF1
292	RHO GTPases activate PKNs_Homo sapiens_R-HSA-5625740	1960-01-01	0.360016	0.546511	0.352729	0.535448	0.271006	-0.276861	MYH10
293	Vasopressin regulates renal water homeostasis via Aquaporins_Homo sapiens_R-HSA-432040	1943-01-01	0.273648	0.487226	0.26909	0.478945	0.217383	-0.281709	AQP1
294	Telomere Maintenance_Homo sapiens_R-HSA-157579	1959-01-01	0.355231	0.546511	0.348081	0.535448	0.273727	-0.283304	TERT
295	B-WICH complex positively regulates rRNA expression_Homo sapiens_R-HSA-5250924	1958-01-01	0.35041	0.544185	0.3434	0.533299	0.271734	-0.284955	TWISTNB
296	Deactivation of the beta-catenin transactivating complex_Homo sapiens_R-HSA-3769402	1942-01-01	0.268221	0.487226	0.263852	0.478945	0.218616	-0.287687	LEF1
297	Interleukin-6 family signaling_Homo sapiens_R-HSA-6783589	2018-01-27	0.181821	0.479493	0.180696	0.458889	0.172904	-0.294756	IL12RB2
298	Adherens junctions interactions_Homo sapiens_R-HSA-418990	2018-01-31	0.205805	0.479493	0.203734	0.458889	0.188062	-0.297293	CDH10
299	Lipid digestion, mobilization, and transport_Homo sapiens_R-HSA-73923	1971-01-01	0.410383	0.598697	0.40175	0.578599	0.334381	-0.297822	LIPI
300	Glucagon-like Peptide-1 (GLP1) regulates insulin secretion_Homo sapiens_R-HSA-381676	1942-01-01	0.268221	0.487226	0.263852	0.478945	0.227165	-0.298936	GLP1R
301	Semaphorin interactions_Homo sapiens_R-HSA-373755	1967-01-01	0.39254	0.580202	0.384362	0.568114	0.321654	-0.300784	MYH10
302	Molecules associated with elastic fibres_Homo sapiens_R-HSA-2129379	2018-01-30	0.199875	0.479493	0.198035	0.458889	0.188041	-0.302757	FBLN1
303	Aquaporin-mediated transport_Homo sapiens_R-HSA-445717	1951-01-01	0.315646	0.50896	0.309697	0.49699	0.272796	-0.31457	AQP1
304	RNA Polymerase I Chain Elongation_Homo sapiens_R-HSA-73777	1957-01-01	0.345553	0.539126	0.338687	0.528414	0.297072	-0.315671	TWISTNB
305	G alpha (z) signalling events_Homo sapiens_R-HSA-418597	1946-01-01	0.289689	0.500642	0.284586	0.483277	0.264899	-0.328196	PRKCH
306	Phospholipase C-mediated cascade: FGFR1_Homo sapiens_R-HSA-5654219	1947-01-01	0.294957	0.500807	0.289679	0.483277	0.27283	-0.333105	FGF1
307	Activation of Matrix Metalloproteinases_Homo sapiens_R-HSA-1592389	1932-01-01	0.211691	0.479493	0.209394	0.458889	0.216619	-0.336328	CTSV
308	HIV Transcription Initiation_Homo sapiens_R-HSA-167161	1944-01-01	0.279034	0.487226	0.274292	0.478945	0.268968	-0.343316	TAF4
309	Cell-cell junction organization_Homo sapiens_R-HSA-421270	1961-01-01	0.364766	0.548778	0.357344	0.537611	0.341163	-0.344063	CDH10
310	Phospholipase C-mediated cascade; FGFR2_Homo sapiens_R-HSA-5654221	1949-01-01	0.305378	0.504472	0.299759	0.492562	0.292381	-0.346824	FGF1
311	Cleavage of Growing Transcript in the Termination Region_Homo sapiens_R-HSA-109688	1960-01-01	0.360016	0.546511	0.352729	0.535448	0.366179	-0.374091	U2AF1
312	RNA Polymerase II HIV Promoter Escape_Homo sapiens_R-HSA-167162	1944-01-01	0.279034	0.487226	0.274292	0.478945	0.295445	-0.377112	TAF4
313	Post-Elongation Processing of the Transcript_Homo sapiens_R-HSA-76044	1960-01-01	0.360016	0.546511	0.352729	0.535448	0.376596	-0.384733	U2AF1
314	RNA Polymerase II Promoter Escape_Homo sapiens_R-HSA-73776	1944-01-01	0.279034	0.487226	0.274292	0.478945	0.304474	-0.388637	TAF4
315	Regulation of Insulin-like Growth Factor (IGF) transport and uptake by Insulin-like Growth Factor Binding Proteins (IGFBPs)_Homo sapiens_R-HSA-381426	2018-01-21	0.144489	0.479493	0.144903	0.458889	0.200945	-0.388738	IGF1
316	Heparan sulfate/heparin (HS-GAG) metabolism_Homo sapiens_R-HSA-1638091	1954-01-01	0.330765	0.528284	0.324345	0.508392	0.356128	-0.394001	HS6ST2
317	RNA Polymerase II Transcription Initiation And Promoter Clearance_Homo sapiens_R-HSA-76042	1944-01-01	0.279034	0.487226	0.274292	0.478945	0.316759	-0.404317	TAF4
318	Defensins_Homo sapiens_R-HSA-1461973	1947-01-01	0.294957	0.500807	0.289679	0.483277	0.331211	-0.404384	DEFB108B
319	RNA Polymerase II Transcription Termination_Homo sapiens_R-HSA-73856	1960-01-01	0.360016	0.546511	0.352729	0.535448	0.398768	-0.407384	U2AF1
320	TRP channels_Homo sapiens_R-HSA-3295583	2018-01-25	0.16956	0.479493	0.168932	0.458889	0.229654	-0.407532	TRPV6
321	Beta defensins_Homo sapiens_R-HSA-1461957	1938-01-01	0.246109	0.479493	0.242527	0.464559	0.296283	-0.415383	DEFB108B
322	EPH-ephrin mediated repulsion of cells_Homo sapiens_R-HSA-3928665	1948-01-01	0.300187	0.500807	0.294737	0.486893	0.348681	-0.419585	EPHA4
323	RNA Polymerase II Transcription Initiation_Homo sapiens_R-HSA-75953	1944-01-01	0.279034	0.487226	0.274292	0.478945	0.329988	-0.421203	TAF4
324	Nitric oxide stimulates guanylate cyclase_Homo sapiens_R-HSA-392154	2018-01-25	0.16956	0.479493	0.168932	0.458889	0.237747	-0.421892	KCNMB4
325	RNA Polymerase II Transcription Pre-Initiation And Promoter Opening_Homo sapiens_R-HSA-73779	1944-01-01	0.279034	0.487226	0.274292	0.478945	0.339392	-0.433207	TAF4
326	RNA Polymerase I Transcription Initiation_Homo sapiens_R-HSA-73762	1947-01-01	0.294957	0.500807	0.289679	0.483277	0.35603	-0.434686	TWISTNB
327	Assembly of collagen fibrils and other multimeric structures_Homo sapiens_R-HSA-2022090	1954-01-01	0.330765	0.528284	0.324345	0.508392	0.408509	-0.451952	CTSV
328	Elastic fibre formation_Homo sapiens_R-HSA-1566948	1941-01-01	0.262754	0.487226	0.258577	0.478945	0.357711	-0.478093	FBLN1
329	IL-6-type cytokine receptor ligand interactions_Homo sapiens_R-HSA-6788467	2018-01-20	0.138104	0.479493	0.13879	0.458889	0.244399	-0.483847	IL12RB2
330	Retinoid metabolism and transport_Homo sapiens_R-HSA-975634	1942-01-01	0.268221	0.487226	0.263852	0.478945	0.368239	-0.484582	LRP2
331	mRNA 3'-end processing_Homo sapiens_R-HSA-72187	1951-01-01	0.315646	0.50896	0.309697	0.49699	0.43676	-0.503643	U2AF1
332	Metabolism of fat-soluble vitamins_Homo sapiens_R-HSA-6806667	1951-01-01	0.315646	0.50896	0.309697	0.49699	0.444452	-0.512513	LRP2
333	Steroid hormones_Homo sapiens_R-HSA-209943	1937-01-01	0.240478	0.479493	0.237101	0.464559	0.360665	-0.513992	LRP2
334	Post-Elongation Processing of Intron-Containing pre-mRNA_Homo sapiens_R-HSA-112296	1951-01-01	0.315646	0.50896	0.309697	0.49699	0.449334	-0.518143	U2AF1
335	Synthesis of PC_Homo sapiens_R-HSA-1483191	2018-01-20	0.138104	0.479493	0.13879	0.458889	0.275035	-0.544498	SLC44A3
336	NCAM1 interactions_Homo sapiens_R-HSA-419037	1937-01-01	0.240478	0.479493	0.237101	0.464559	0.387969	-0.552905	GDNF
337	Pyruvate metabolism and Citric Acid (TCA) cycle_Homo sapiens_R-HSA-71406	1948-01-01	0.300187	0.500807	0.294737	0.486893	0.504346	-0.606905	LDHAL6A

## Sheet: Mtb_1d
	Term	Overlap	P.value	Adjusted.P.value	Old.P.value	Old.Adjusted.P.value	Z.score	Combined.Score	Genes
1	Erythrocytes take up oxygen and release carbon dioxide_Homo sapiens_R-HSA-1247673	2018-03-08	0.000129595	0.0813855	0.000367822	0.204089	-1.88716	16.8922	HBB;SLC4A1;HBA1
2	Erythrocytes take up carbon dioxide and release oxygen_Homo sapiens_R-HSA-1237044	2018-03-12	0.000489115	0.102388	0.000974949	0.204089	-1.8379	14.0102	HBB;SLC4A1;HBA1
3	O2/CO2 exchange in erythrocytes_Homo sapiens_R-HSA-1480926	2018-03-12	0.000489115	0.102388	0.000974949	0.204089	-1.82033	13.8762	HBB;SLC4A1;HBA1
4	Extension of Telomeres_Homo sapiens_R-HSA-180786	2018-03-28	0.00621082	0.557199	0.00822978	0.745883	-2.36798	12.0328	RUVBL2;POLD2;NHP2
5	Inositol phosphate metabolism_Homo sapiens_R-HSA-1483249	1944-04-01	0.00288527	0.36239	0.00391442	0.604788	-2.03832	11.9204	NUDT11;NUDT10;INPP5J;PLD4
6	Telomere Maintenance_Homo sapiens_R-HSA-157579	1959-04-01	0.00826614	0.576793	0.0102645	0.745883	-2.03979	9.78199	RUVBL2;POLD2;NHP2;HIST3H2BB
7	Bicarbonate transporters_Homo sapiens_R-HSA-425381	2018-02-09	0.00614027	0.557199	0.00921074	0.745883	-1.55599	7.92446	SLC4A1;SLC4A3
8	Intraflagellar transport_Homo sapiens_R-HSA-5620924	1941-03-01	0.017779	0.727787	0.0213641	0.745883	-1.90034	7.65789	IFT22;WDR34;KIF17
9	Class B/2 (Secretin family receptors)_Homo sapiens_R-HSA-373080	1984-04-01	0.0270356	0.727787	0.0311148	0.745883	-2.0831	7.52124	FZD1;WNT10B;FZD2;FZD9
10	Synthesis of pyrophosphates in the cytosol_Homo sapiens_R-HSA-1855167	2018-02-10	0.00760729	0.576793	0.0109558	0.745883	-1.51779	7.40477	NUDT11;NUDT10
11	Signaling by NOTCH_Homo sapiens_R-HSA-157118	5/122	0.0250093	0.727787	0.0287003	0.745883	-1.91993	7.08167	MDK;ATP2A1;DTX4;HES5;DLK1
12	Chromosome Maintenance_Homo sapiens_R-HSA-73886	1986-04-01	0.0291475	0.727787	0.033408	0.745883	-1.95228	6.90205	RUVBL2;POLD2;NHP2;HIST3H2BB
13	CRMPs in Sema3A signaling_Homo sapiens_R-HSA-399956	2018-02-16	0.0192347	0.727787	0.0240924	0.745883	-1.73509	6.85543	DPYSL3;CDK5R1
14	Post-chaperonin tubulin folding pathway_Homo sapiens_R-HSA-389977	2018-02-22	0.0351204	0.727787	0.0412417	0.745883	-1.90766	6.38871	TUBB2B;TUBB2A
15	Apoptotic execution phase_Homo sapiens_R-HSA-75153	1951-03-01	0.0314974	0.727787	0.0363253	0.745883	-1.80056	6.22608	TJP1;BMX;HIST1H1A
16	Cardiac conduction_Homo sapiens_R-HSA-5576891	5/135	0.0364184	0.727787	0.0410707	0.745883	-1.75451	5.81214	KCNH2;KCNJ12;KCNIP3;ATP2A1;KCNJ2
17	TNFs bind their physiological receptors_Homo sapiens_R-HSA-5669034	2018-02-24	0.0412325	0.727787	0.0477263	0.745883	-1.80542	5.75663	LTA;TNFRSF25
18	Translocation of ZAP-70 to Immunological synapse_Homo sapiens_R-HSA-202430	2018-02-21	0.0322093	0.727787	0.0381356	0.745883	-1.67343	5.74908	ZAP70;CD3E
19	TCF dependent signaling in response to WNT_Homo sapiens_R-HSA-201681	6/199	0.053493	0.727787	0.0592556	0.745883	-1.96094	5.74205	FZD1;PYGO1;FZD2;HIST2H3A;HIST3H2BB;PSMA8
20	Asymmetric localization of PCP proteins_Homo sapiens_R-HSA-4608870	1963-03-01	0.0534638	0.727787	0.0597287	0.745883	-1.92636	5.64181	FZD1;FZD2;PSMA8
21	Telomere Extension By Telomerase_Homo sapiens_R-HSA-171319	2018-02-06	0.00262787	0.36239	0.00481519	0.604788	-0.934901	5.55479	RUVBL2;NHP2
22	Mitophagy_Homo sapiens_R-HSA-5205647	2018-02-22	0.0351204	0.727787	0.0412417	0.745883	-1.64707	5.51598	TOMM40;TOMM22
23	B-WICH complex positively regulates rRNA expression_Homo sapiens_R-HSA-5250924	1958-03-01	0.0436005	0.727787	0.0492784	0.745883	-1.76001	5.51355	HIST2H3A;MYBBP1A;HIST3H2BB
24	Muscle contraction_Homo sapiens_R-HSA-397014	6/196	0.0503857	0.727787	0.055938	0.745883	-1.8426	5.50578	KCNH2;DES;KCNJ12;KCNIP3;ATP2A1;KCNJ2
25	Pink/Parkin Mediated Mitophagy_Homo sapiens_R-HSA-5205685	2018-02-22	0.0351204	0.727787	0.0412417	0.745883	-1.62491	5.4418	TOMM40;TOMM22
26	Mitochondrial protein import_Homo sapiens_R-HSA-1268020	1954-03-01	0.0364362	0.727787	0.0416318	0.745883	-1.63477	5.41469	TOMM40;ATP5G1;TOMM22
27	Activation of G protein gated Potassium channels_Homo sapiens_R-HSA-1296041	2018-02-25	0.0444273	0.727787	0.0510988	0.745883	-1.73472	5.40175	KCNJ12;KCNJ2
28	Potassium Channels_Homo sapiens_R-HSA-1296071	1999-04-01	0.0452137	0.727787	0.0506735	0.745883	-1.70143	5.26823	KCNH2;KCNJ12;KCNA5;KCNJ2
29	G protein gated Potassium channels_Homo sapiens_R-HSA-1296059	2018-02-25	0.0444273	0.727787	0.0510988	0.745883	-1.68458	5.24561	KCNJ12;KCNJ2
30	Phase 4 - resting membrane potential_Homo sapiens_R-HSA-5576886	2018-02-19	0.0266933	0.727787	0.0322113	0.745883	-1.43958	5.2161	KCNJ12;KCNJ2
31	Inhibition of voltage gated Ca2+ channels via Gbeta/gamma subunits_Homo sapiens_R-HSA-997272	2018-02-25	0.0444273	0.727787	0.0510988	0.745883	-1.66765	5.19291	KCNJ12;KCNJ2
32	Synthesis of IP3 and IP4 in the cytosol_Homo sapiens_R-HSA-1855204	2018-02-25	0.0444273	0.727787	0.0510988	0.745883	-1.65359	5.1491	INPP5J;PLD4
33	Transport of inorganic cations/anions and amino acids/oligopeptides_Homo sapiens_R-HSA-425393	1999-04-01	0.0452137	0.727787	0.0506735	0.745883	-1.65312	5.11864	SLC25A10;SLC4A1;SLC4A3;SLC38A5
34	Disassembly of the destruction complex and recruitment of AXIN to the membrane_Homo sapiens_R-HSA-4641262	1931-02-01	0.0653529	0.727787	0.0729802	0.745883	-1.86056	5.07552	FZD1;FZD2
35	Formation of tubulin folding intermediates by CCT/TriC_Homo sapiens_R-HSA-389960	2018-02-25	0.0444273	0.727787	0.0510988	0.745883	-1.59743	4.97424	TUBB2B;TUBB2A
36	tRNA processing_Homo sapiens_R-HSA-72306	4/103	0.0509768	0.727787	0.0568081	0.745883	-1.66673	4.96082	CTU2;POP7;RPP40;TRMT61A
37	Formation of the beta-catenin:TCF transactivating complex_Homo sapiens_R-HSA-201722	1958-03-01	0.0436005	0.727787	0.0492784	0.745883	-1.49336	4.67822	PYGO1;HIST2H3A;HIST3H2BB
38	Prefoldin mediated transfer of substrate to CCT/TriC_Homo sapiens_R-HSA-389957	2018-02-27	0.0510794	0.727787	0.0580901	0.745883	-1.56313	4.64933	TUBB2B;TUBB2A
39	Inwardly rectifying K+ channels_Homo sapiens_R-HSA-1296065	1931-02-01	0.0653529	0.727787	0.0729802	0.745883	-1.67368	4.56571	KCNJ12;KCNJ2
40	Activated NOTCH1 Transmits Signal to the Nucleus_Homo sapiens_R-HSA-2122948	1930-02-01	0.0616703	0.727787	0.0691509	0.745883	-1.51031	4.20767	DTX4;DLK1
41	Transcriptional regulation by small RNAs_Homo sapiens_R-HSA-5578749	1972-03-01	0.0736351	0.727787	0.0809003	0.745883	-1.58763	4.14155	HIST2H3A;HIST3H2BB;POLR2I
42	Signaling by NOTCH1_Homo sapiens_R-HSA-1980143	1972-03-01	0.0736351	0.727787	0.0809003	0.745883	-1.566	4.08512	DTX4;HES5;DLK1
43	RNA Polymerase I Promoter Opening_Homo sapiens_R-HSA-73728	1930-02-01	0.0616703	0.727787	0.0691509	0.745883	-1.4306	3.98557	HIST2H3A;HIST3H2BB
44	Signaling by Wnt_Homo sapiens_R-HSA-195721	7/295	0.105883	0.727787	0.114618	0.745883	-1.71942	3.86082	FZD1;PYGO1;WNT10B;FZD2;HIST2H3A;HIST3H2BB;PSMA8
45	Cooperation of Prefoldin and TriC/CCT in actin and tubulin folding_Homo sapiens_R-HSA-389958	1932-02-01	0.0691072	0.727787	0.0768766	0.745883	-1.44181	3.85266	TUBB2B;TUBB2A
46	Signaling by NOTCH2_Homo sapiens_R-HSA-1980145	1932-02-01	0.0691072	0.727787	0.0768766	0.745883	-1.43257	3.82796	MDK;HES5
47	DNA strand elongation_Homo sapiens_R-HSA-69190	1932-02-01	0.0691072	0.727787	0.0768766	0.745883	-1.42892	3.8182	GINS2;POLD2
48	DNA methylation_Homo sapiens_R-HSA-5334118	1932-02-01	0.0691072	0.727787	0.0768766	0.745883	-1.4081	3.76257	HIST2H3A;HIST3H2BB
49	Positive epigenetic regulation of rRNA expression_Homo sapiens_R-HSA-5250913	1973-03-01	0.0760585	0.727787	0.0834298	0.745883	-1.43433	3.69519	HIST2H3A;MYBBP1A;HIST3H2BB
50	Developmental Biology_Homo sapiens_R-HSA-1266738	15/786	0.113266	0.727787	0.122235	0.745883	-1.66862	3.63427	WNT10B;DUSP2;PKLR;SDC2;PHB;SLC2A4;PSMA8;HIST2H3A;CDH2;DPYSL3;HIST3H2BB;POLR2I;FGFR3;CAP2;CDK5R1
51	Binding and Uptake of Ligands by Scavenger Receptors_Homo sapiens_R-HSA-2173782	1974-03-01	0.0785169	0.727787	0.0859932	0.745883	-1.37034	3.48674	HBB;HBA1;CALR
52	Activated PKN1 stimulates transcription of AR (androgen receptor) regulated genes KLK2 and KLK3_Homo sapiens_R-HSA-5625886	1934-02-01	0.0768205	0.727787	0.0848601	0.745883	-1.35682	3.48198	HIST2H3A;HIST3H2BB
53	Metabolism of polyamines_Homo sapiens_R-HSA-351202	1984-03-01	0.104917	0.727787	0.113381	0.745883	-1.50776	3.39937	CPS1;ODC1;PSMA8
54	SIRT1 negatively regulates rRNA Expression_Homo sapiens_R-HSA-427359	1935-02-01	0.0807745	0.727787	0.0889426	0.745883	-1.34182	3.37614	HIST2H3A;HIST3H2BB
55	Generation of second messenger molecules_Homo sapiens_R-HSA-202433	1935-02-01	0.0807745	0.727787	0.0889426	0.745883	-1.18369	2.97828	ZAP70;CD3E
56	Activation of GABAB receptors_Homo sapiens_R-HSA-991365	1939-02-01	0.0971837	0.727787	0.105824	0.745883	-1.21819	2.83979	KCNJ12;KCNJ2
57	Apoptotic cleavage of cellular proteins_Homo sapiens_R-HSA-111465	1937-02-01	0.0888652	0.727787	0.0972774	0.745883	-1.16388	2.81733	TJP1;BMX
58	GABA B receptor activation_Homo sapiens_R-HSA-977444	1939-02-01	0.0971837	0.727787	0.105824	0.745883	-1.20419	2.80714	KCNJ12;KCNJ2
59	PRC2 methylates histones and DNA_Homo sapiens_R-HSA-212300	1940-02-01	0.101423	0.727787	0.110171	0.745883	-1.21009	2.76925	HIST2H3A;HIST3H2BB
60	PCP/CE pathway_Homo sapiens_R-HSA-4086400	1991-03-01	0.125189	0.727787	0.134275	0.745883	-1.29842	2.69804	FZD1;FZD2;PSMA8
61	Factors involved in megakaryocyte development and platelet production_Homo sapiens_R-HSA-983231	4/141	0.12394	0.727787	0.133103	0.745883	-1.24551	2.60057	HIST2H3A;GATA5;HBB;HBD
62	TNFR2 non-canonical NF-kB pathway_Homo sapiens_R-HSA-5668541	1995-03-01	0.137358	0.727787	0.146773	0.745883	-1.27665	2.53437	LTA;TNFRSF25;PSMA8
63	Activation of anterior HOX genes in hindbrain development during early embryogenesis_Homo sapiens_R-HSA-5617472	1989-03-01	0.119259	0.727787	0.128173	0.745883	-1.18688	2.52385	HIST2H3A;HIST3H2BB;POLR2I
64	Activation of HOX genes during differentiation_Homo sapiens_R-HSA-5619507	1989-03-01	0.119259	0.727787	0.128173	0.745883	-1.1775	2.5039	HIST2H3A;HIST3H2BB;POLR2I
65	tRNA modification in the nucleus and cytosol_Homo sapiens_R-HSA-6782315	1939-02-01	0.0971837	0.727787	0.105824	0.745883	-1.05855	2.46764	CTU2;TRMT61A
66	Synthesis of DNA_Homo sapiens_R-HSA-69239	1997-03-01	0.143589	0.727787	0.153161	0.745883	-1.25812	2.44176	GINS2;POLD2;PSMA8
67	Condensation of Prophase Chromosomes_Homo sapiens_R-HSA-2299718	1941-02-01	0.105712	0.727787	0.114564	0.745883	-1.05701	2.37513	HIST2H3A;HIST3H2BB
68	Non-integrin membrane-ECM interactions_Homo sapiens_R-HSA-3000171	1942-02-01	0.11005	0.727787	0.119003	0.745883	-1.03465	2.28328	LAMC3;SDC2
69	Metabolism_Homo sapiens_R-HSA-1430728	31/1908	0.160911	0.727787	0.170735	0.745883	-1.21061	2.21166	PNMT;SNAP25;ALAS2;COX16;CPNE7;SDC2;ODC1;PLD4;HBB;MT1X;GPT;SLC4A1;SLC2A4;ATP5G1;PFAS;PSMA8;NUDT11;NUDT10;INPP5J;TEAD4;PKLR;STARD6;HBA1;SGPP2;GCAT;COQ3;CPS1;SLC25A10;LCT;CD320;ABCG2
70	Elastic fibre formation_Homo sapiens_R-HSA-1566948	1941-02-01	0.105712	0.727787	0.114564	0.745883	-0.948477	2.13126	ELN;ITGA8
71	Metabolism of amino acids and derivatives_Homo sapiens_R-HSA-71291	7/335	0.168906	0.727787	0.180396	0.745883	-1.15415	2.05256	PNMT;CPS1;ODC1;GPT;SLC25A10;GCAT;PSMA8
72	Voltage gated Potassium channels_Homo sapiens_R-HSA-1296072	1943-02-01	0.114434	0.727787	0.123483	0.745883	-0.928003	2.01169	KCNH2;KCNA5
73	Gene Silencing by RNA_Homo sapiens_R-HSA-211000	3/101	0.156322	0.727787	0.166193	0.745883	-1.08211	2.00821	HIST2H3A;HIST3H2BB;POLR2I
74	ERCC6 (CSB) and EHMT2 (G9a) positively regulate rRNA expression_Homo sapiens_R-HSA-427389	1943-02-01	0.114434	0.727787	0.123483	0.745883	-0.864059	1.87307	HIST2H3A;HIST3H2BB
75	DNA Replication_Homo sapiens_R-HSA-69306	3/105	0.169391	0.727787	0.179542	0.745883	-1.04935	1.86317	GINS2;POLD2;PSMA8
76	Apoptosis_Homo sapiens_R-HSA-109581	4/163	0.179012	0.727787	0.189778	0.745883	-0.918717	1.58047	TJP1;BMX;HIST1H1A;PSMA8
77	Regulation of ornithine decarboxylase (ODC)_Homo sapiens_R-HSA-350562	1950-02-01	0.146247	0.727787	0.155881	0.745883	-0.802484	1.54274	ODC1;PSMA8
78	HATs acetylate histones_Homo sapiens_R-HSA-3214847	3/107	0.176041	0.727787	0.186325	0.745883	-0.846578	1.47054	HIST2H3A;RUVBL2;HIST3H2BB
79	Programmed Cell Death_Homo sapiens_R-HSA-5357801	4/166	0.187086	0.727787	0.198047	0.745883	-0.871797	1.46129	TJP1;BMX;HIST1H1A;PSMA8
80	Scavenging of heme from plasma_Homo sapiens_R-HSA-2168880	1946-02-01	0.127842	0.727787	0.137161	0.745883	-0.681339	1.40149	HBB;HBA1
81	Amino acid and oligopeptide SLC transporters_Homo sapiens_R-HSA-425374	1949-02-01	0.141595	0.727787	0.151154	0.745883	-0.713324	1.3944	SLC25A10;SLC38A5
82	HDR through Homologous Recombination (HR) or Single Strand Annealing (SSA)_Homo sapiens_R-HSA-5693567	3/112	0.19297	0.727787	0.203566	0.745883	-0.740892	1.21893	EME1;POLD2;HIST3H2BB
83	SCF-beta-TrCP mediated degradation of Emi1_Homo sapiens_R-HSA-174113	1954-02-01	0.165152	0.727787	0.175052	0.745883	-0.660984	1.19036	CDC20;PSMA8
84	Meiotic recombination_Homo sapiens_R-HSA-912446	1954-02-01	0.165152	0.727787	0.175052	0.745883	-0.633545	1.14094	HIST2H3A;HIST3H2BB
85	Neuronal System_Homo sapiens_R-HSA-112316	6/301	0.222701	0.727787	0.235574	0.745883	-0.717215	1.0772	KCNH2;SNAP25;KCNJ12;TSPAN7;KCNA5;KCNJ2
86	mRNA Splicing - Minor Pathway_Homo sapiens_R-HSA-72165	1952-02-01	0.155644	0.727787	0.165416	0.745883	-0.575805	1.0711	SNRNP25;POLR2I
87	Epigenetic regulation of gene expression_Homo sapiens_R-HSA-212165	3/115	0.203317	0.727787	0.214085	0.745883	-0.651861	1.03841	HIST2H3A;MYBBP1A;HIST3H2BB
88	Homology Directed Repair_Homo sapiens_R-HSA-5693538	3/118	0.213789	0.727787	0.22472	0.745883	-0.625245	0.964605	EME1;POLD2;HIST3H2BB
89	TCR signaling_Homo sapiens_R-HSA-202403	3/118	0.213789	0.727787	0.22472	0.745883	-0.625165	0.964482	ZAP70;CD3E;PSMA8
90	GABA receptor activation_Homo sapiens_R-HSA-977443	1955-02-01	0.169944	0.727787	0.179904	0.745883	-0.490067	0.868539	KCNJ12;KCNJ2
91	rRNA processing_Homo sapiens_R-HSA-72312	4/180	0.226188	0.727787	0.237975	0.745883	-0.574912	0.854543	BOP1;PES1;RPP40;NHP2
92	GPCR ligand binding_Homo sapiens_R-HSA-500792	8/447	0.258316	0.727787	0.27328	0.745883	-0.563944	0.763338	FZD1;WNT10B;FZD2;KEL;GAL;FZD9;APLNR;TRH
93	RNA Polymerase I Chain Elongation_Homo sapiens_R-HSA-73777	1957-02-01	0.179596	0.727787	0.189667	0.745883	-0.439038	0.753849	HIST2H3A;HIST3H2BB
94	S Phase_Homo sapiens_R-HSA-69242	3/124	0.235061	0.727787	0.246286	0.745883	-0.513599	0.743646	GINS2;POLD2;PSMA8
95	tRNA processing in the nucleus_Homo sapiens_R-HSA-6784531	1957-02-01	0.179596	0.727787	0.189667	0.745883	-0.393955	0.676439	POP7;RPP40
96	Gap-filling DNA repair synthesis and ligation in TC-NER_Homo sapiens_R-HSA-6782210	1962-02-01	0.204055	0.727787	0.214363	0.745883	-0.41751	0.663575	POLD2;POLR2I
97	DNA Damage/Telomere Stress Induced Senescence_Homo sapiens_R-HSA-2559586	1959-02-01	0.189329	0.727787	0.199501	0.745883	-0.373738	0.622002	HIST3H2BB;HIST1H1A
98	HDACs deacetylate histones_Homo sapiens_R-HSA-3214815	1960-02-01	0.194222	0.727787	0.204442	0.745883	-0.375163	0.6148	HIST2H3A;HIST3H2BB
99	RHO GTPases activate PKNs_Homo sapiens_R-HSA-5625740	1960-02-01	0.194222	0.727787	0.204442	0.745883	-0.351263	0.575633	HIST2H3A;HIST3H2BB
100	Assembly of the primary cilium_Homo sapiens_R-HSA-5617833	4/187	0.246475	0.727787	0.258624	0.745883	-0.405099	0.567339	IFT22;B9D1;WDR34;KIF17
101	Dual incision in TC-NER_Homo sapiens_R-HSA-6782135	1963-02-01	0.208993	0.727787	0.21934	0.745883	-0.358097	0.560584	POLD2;POLR2I
102	APC/C:Cdc20 mediated degradation of Securin_Homo sapiens_R-HSA-174154	1966-02-01	0.223873	0.727787	0.234329	0.745883	-0.370514	0.55454	CDC20;PSMA8
103	ER-Phagosome pathway_Homo sapiens_R-HSA-1236974	1965-02-01	0.218903	0.727787	0.229325	0.745883	-0.302695	0.459833	CALR;PSMA8
104	Signaling by FGFR in disease_Homo sapiens_R-HSA-1226099	1963-02-01	0.208993	0.727787	0.21934	0.745883	-0.293639	0.459679	POLR2I;FGFR3
105	HDR through Homologous Recombination (HRR)_Homo sapiens_R-HSA-5685942	1964-02-01	0.213942	0.727787	0.224328	0.745883	-0.29807	0.459639	EME1;POLD2
106	Peptide ligand-binding receptors_Homo sapiens_R-HSA-375276	4/193	0.26417	0.727787	0.276603	0.745883	-0.295435	0.393273	KEL;GAL;APLNR;TRH
107	APC/C:Cdh1 mediated degradation of Cdc20 and other APC/C:Cdh1 targeted proteins in late mitosis/early G1_Homo sapiens_R-HSA-174178	1971-02-01	0.248832	0.727787	0.25943	0.745883	-0.215212	0.299356	CDC20;PSMA8
108	APC:Cdc20 mediated degradation of cell cycle proteins prior to satisfation of the cell cycle checkpoint_Homo sapiens_R-HSA-179419	1972-02-01	0.253838	0.727787	0.264458	0.745883	-0.176257	0.241659	CDC20;PSMA8
109	Cdc20:Phospho-APC/C mediated degradation of Cyclin A_Homo sapiens_R-HSA-174184	1971-02-01	0.248832	0.727787	0.25943	0.745883	-0.157646	0.219282	CDC20;PSMA8
110	APC/C:Cdc20 mediated degradation of mitotic proteins_Homo sapiens_R-HSA-176409	1974-02-01	0.263855	0.727787	0.274516	0.745883	-0.11608	0.15466	CDC20;PSMA8
111	SLC-mediated transmembrane transport_Homo sapiens_R-HSA-425407	5/268	0.295986	0.727972	0.309779	0.745883	-0.123632	0.150515	SLC25A10;SLC4A1;SLC2A4;SLC4A3;SLC38A5
112	Amyloid fiber formation_Homo sapiens_R-HSA-977225	1968-02-01	0.233839	0.727787	0.244357	0.745883	-0.0279586	0.0406273	HIST2H3A;HIST3H2BB
113	Beta-catenin independent WNT signaling_Homo sapiens_R-HSA-3858494	3/144	0.307993	0.727972	0.319931	0.745883	-0.0219793	0.0258846	FZD1;FZD2;PSMA8
114	Activation of APC/C and APC/C:Cdc20 mediated degradation of mitotic proteins_Homo sapiens_R-HSA-176814	1975-02-01	0.268864	0.727787	0.279543	0.745883	-0.00878078	0.011534	CDC20;PSMA8
115	GPCR downstream signaling_Homo sapiens_R-HSA-388396	4/983	0.999349	0.999349	0.999537	0.999537	2.76022	-0.00179626	GAL;APLNR;TRH;OR7D2
116	Neurotransmitter Receptor Binding And Downstream Transmission In The Postsynaptic Cell_Homo sapiens_R-HSA-112314	3/142	0.300619	0.727972	0.312503	0.745883	0.00406079	-0.00488071	KCNJ12;TSPAN7;KCNJ2
117	Olfactory Signaling Pathway_Homo sapiens_R-HSA-381753	1/418	0.996791	0.998381	0.997093	0.998684	2.75672	-0.00885943	OR7D2
118	Metabolism of carbohydrates_Homo sapiens_R-HSA-71387	5/282	0.332967	0.727972	0.347317	0.745883	0.0177523	-0.0195224	PKLR;SDC2;SLC25A10;SLC2A4;LCT
119	Transmission across Chemical Synapses_Homo sapiens_R-HSA-112315	4/211	0.318437	0.727972	0.331571	0.745883	0.0234172	-0.026797	SNAP25;KCNJ12;TSPAN7;KCNJ2
120	Semaphorin interactions_Homo sapiens_R-HSA-373755	1967-02-01	0.228852	0.727787	0.239341	0.745883	0.0243685	-0.0359357	DPYSL3;CDK5R1
121	Membrane Trafficking_Homo sapiens_R-HSA-199991	2/420	0.978553	0.98168	0.980313	0.983445	2.84706	-0.061724	TJP1;SLC2A4
122	DNA Double-Strand Break Repair_Homo sapiens_R-HSA-5693532	3/145	0.311682	0.727972	0.323646	0.745883	0.0565038	-0.0658705	EME1;POLD2;HIST3H2BB
123	Post-translational protein modification_Homo sapiens_R-HSA-597592	3/521	0.973242	0.977913	0.975928	0.980612	2.76539	-0.0750052	ST6GALNAC1;DPH2;CALR
124	Extracellular matrix organization_Homo sapiens_R-HSA-1474244	5/283	0.335628	0.727972	0.350014	0.745883	0.0778177	-0.0849577	LAMC3;SDC2;ELN;ITGA8;PRSS2
125	mRNA Splicing_Homo sapiens_R-HSA-72172	3/144	0.307993	0.727972	0.319931	0.745883	0.0769984	-0.0906793	ALYREF;SNRNP25;POLR2I
126	NoRC negatively regulates rRNA expression_Homo sapiens_R-HSA-427413	1973-02-01	0.258846	0.727787	0.269487	0.745883	0.106883	-0.144455	HIST2H3A;HIST3H2BB
127	Fatty acid, triacylglycerol, and ketone body metabolism_Homo sapiens_R-HSA-535734	1/217	0.948471	0.954551	0.950423	0.956516	2.85848	-0.151226	TEAD4
128	Regulation of APC/C activators between G1/S and early anaphase_Homo sapiens_R-HSA-176408	1979-02-01	0.288887	0.727972	0.299622	0.745883	0.126634	-0.157244	CDC20;PSMA8
129	Diseases of signal transduction_Homo sapiens_R-HSA-5663202	5/288	0.348959	0.727972	0.363516	0.745883	0.156943	-0.16523	POLR2I;FGFR3;HES5;STRA6;PSMA8
130	Transcription-Coupled Nucleotide Excision Repair (TC-NER)_Homo sapiens_R-HSA-6781827	1976-02-01	0.273873	0.727972	0.284568	0.745883	0.134309	-0.173942	POLD2;POLR2I
131	Ion channel transport_Homo sapiens_R-HSA-983712	1/203	0.937544	0.945068	0.939739	0.947281	2.97321	-0.191747	ATP2A1
132	Interferon Signaling_Homo sapiens_R-HSA-913531	1/196	0.931244	0.940227	0.933571	0.942576	3.04054	-0.216591	IRF6
133	G alpha (q) signalling events_Homo sapiens_R-HSA-416476	1/191	0.926359	0.936801	0.928785	0.940769	2.8851	-0.22069	TRH
134	APC/C-mediated degradation of cell cycle proteins_Homo sapiens_R-HSA-174143	1985-02-01	0.318786	0.727972	0.329562	0.745883	0.204794	-0.234127	CDC20;PSMA8
135	Metabolism of proteins_Homo sapiens_R-HSA-392499	10/1074	0.919494	0.931359	0.932315	0.942576	2.81763	-0.236487	ST6GALNAC1;TUBB2B;HIST2H3A;TUBB2A;TOMM40;DPH2;HIST3H2BB;CALR;ATP5G1;TOMM22
136	Senescence-Associated Secretory Phenotype (SASP)_Homo sapiens_R-HSA-2559582	1977-02-01	0.27888	0.727972	0.28959	0.745883	0.187087	-0.238905	HIST2H3A;HIST3H2BB
137	RNA Polymerase I Promoter Clearance_Homo sapiens_R-HSA-73854	1976-02-01	0.273873	0.727972	0.284568	0.745883	0.193902	-0.251121	HIST2H3A;HIST3H2BB
138	Negative epigenetic regulation of rRNA expression_Homo sapiens_R-HSA-5250941	1976-02-01	0.273873	0.727972	0.284568	0.745883	0.196682	-0.254721	HIST2H3A;HIST3H2BB
139	Regulation of mitotic cell cycle_Homo sapiens_R-HSA-453276	1985-02-01	0.318786	0.727972	0.329562	0.745883	0.232388	-0.265673	CDC20;PSMA8
140	Antigen processing-Cross presentation_Homo sapiens_R-HSA-1236975	1982-02-01	0.303865	0.727972	0.314627	0.745883	0.232545	-0.277001	CALR;PSMA8
141	Mitotic G2-G2/M phases_Homo sapiens_R-HSA-453274	1/175	0.908285	0.921491	0.911052	0.925793	2.89363	-0.278358	PSMA8
142	G2/M Transition_Homo sapiens_R-HSA-69275	1/173	0.905735	0.920391	0.908547	0.924745	2.91654	-0.288761	PSMA8
143	Immune System_Homo sapiens_R-HSA-168256	16/1547	0.895367	0.91133	0.91655	0.929876	2.98699	-0.330127	DUSP2;PLD4;PHB;CD3E;DTX4;PSMA8;CDC20;ZAP70;LTA;TNFRSF25;CALR;IRF6;CTSE;PRSS2;FGFR3;C1QC
144	Adaptive Immune System_Homo sapiens_R-HSA-1280218	7/762	0.893166	0.910566	0.904737	0.922362	2.93535	-0.331644	CDC20;ZAP70;CALR;CD3E;CTSE;FGFR3;PSMA8
145	Hedgehog 'on' state_Homo sapiens_R-HSA-5632684	1985-02-01	0.318786	0.727972	0.329562	0.745883	0.29128	-0.333002	GAS1;PSMA8
146	RNA Polymerase I Transcription_Homo sapiens_R-HSA-73864	1979-02-01	0.288887	0.727972	0.299622	0.745883	0.276513	-0.343351	HIST2H3A;HIST3H2BB
147	Role of LAT2/NTAL/LAB on calcium mobilization_Homo sapiens_R-HSA-2730905	1/162	0.890395	0.909216	0.89347	0.912357	3.07147	-0.356569	FGFR3
148	Glucose metabolism_Homo sapiens_R-HSA-70326	1979-02-01	0.288887	0.727972	0.299622	0.745883	0.287443	-0.356923	PKLR;SLC25A10
149	Immunoregulatory interactions between a Lymphoid and a non-Lymphoid cell_Homo sapiens_R-HSA-198933	1/157	0.882623	0.902747	0.885826	0.906024	2.8614	-0.357268	CD3E
150	Signaling by Rho GTPases_Homo sapiens_R-HSA-194315	3/367	0.875537	0.896962	0.882489	0.904083	2.71506	-0.360879	CDC20;HIST2H3A;HIST3H2BB
151	Asparagine N-linked glycosylation_Homo sapiens_R-HSA-446203	2/259	0.86724	0.892824	0.872713	0.898416	2.61191	-0.37204	ST6GALNAC1;CALR
152	Cellular responses to stress_Homo sapiens_R-HSA-2262752	3/367	0.875537	0.896962	0.882489	0.904083	2.86951	-0.381407	HIST2H3A;HIST3H2BB;HIST1H1A
153	Antigen processing: Ubiquitination & Proteasome degradation_Homo sapiens_R-HSA-983168	2/260	0.868655	0.892824	0.874096	0.898416	2.77278	-0.390433	CDC20;PSMA8
154	Transcriptional regulation of white adipocyte differentiation_Homo sapiens_R-HSA-381340	1979-02-01	0.288887	0.727972	0.299622	0.745883	0.323724	-0.401974	WNT10B;SLC2A4
155	Major pathway of rRNA processing in the nucleolus_Homo sapiens_R-HSA-6791226	3/166	0.388948	0.729113	0.401249	0.745883	0.486109	-0.459038	BOP1;PES1;RPP40
156	Innate Immune System_Homo sapiens_R-HSA-168249	8/807	0.85696	0.883696	0.871735	0.898416	3.07618	-0.474851	DUSP2;PLD4;PHB;DTX4;PRSS2;FGFR3;PSMA8;C1QC
157	Cellular Senescence_Homo sapiens_R-HSA-2559583	3/161	0.37066	0.729113	0.382913	0.745883	0.484543	-0.480894	HIST2H3A;HIST3H2BB;HIST1H1A
158	G alpha (i) signalling events_Homo sapiens_R-HSA-418594	2/240	0.837573	0.865569	0.843686	0.872874	2.74361	-0.486294	GAL;APLNR
159	Signaling by GPCR_Homo sapiens_R-HSA-372790	14/1293	0.838003	0.865569	0.861532	0.889872	2.78921	-0.492946	FZD1;WNT10B;DUSP2;FZD2;FZD9;PHB;TRH;PSMA8;KEL;GAL;PPP1R1B;APLNR;OR7D2;FGFR3
160	Phospholipid metabolism_Homo sapiens_R-HSA-1483257	3/161	0.37066	0.729113	0.382913	0.745883	0.500609	-0.496839	CPNE7;INPP5J;PLD4
161	Meiosis_Homo sapiens_R-HSA-1500620	1985-02-01	0.318786	0.727972	0.329562	0.745883	0.439713	-0.502695	HIST2H3A;HIST3H2BB
162	Axon guidance_Homo sapiens_R-HSA-422475	8/515	0.39403	0.729113	0.412341	0.745883	0.543961	-0.506606	DUSP2;SDC2;DPYSL3;PHB;FGFR3;PSMA8;CAP2;CDK5R1
163	GRB2 events in EGFR signaling_Homo sapiens_R-HSA-179812	4/235	0.391822	0.729113	0.405557	0.745883	0.546077	-0.511647	DUSP2;PHB;FGFR3;PSMA8
164	Oxidative Stress Induced Senescence_Homo sapiens_R-HSA-2559580	1991-02-01	0.348381	0.727972	0.359154	0.745883	0.487221	-0.513754	HIST2H3A;HIST3H2BB
165	RAF/MAP kinase cascade_Homo sapiens_R-HSA-5673001	4/235	0.391822	0.729113	0.405557	0.745883	0.555019	-0.520025	DUSP2;PHB;FGFR3;PSMA8
166	FRS-mediated FGFR1 signaling_Homo sapiens_R-HSA-5654693	4/236	0.39487	0.729113	0.408622	0.745883	0.562144	-0.522344	DUSP2;PHB;FGFR3;PSMA8
167	Cell-Cell communication_Homo sapiens_R-HSA-1500931	1/131	0.832437	0.862658	0.836394	0.866758	2.84842	-0.522392	CDH2
168	SHC1 events in EGFR signaling_Homo sapiens_R-HSA-180336	4/235	0.391822	0.729113	0.405557	0.745883	0.564964	-0.529342	DUSP2;PHB;FGFR3;PSMA8
169	FRS-mediated FGFR2 signaling_Homo sapiens_R-HSA-5654700	4/236	0.39487	0.729113	0.408622	0.745883	0.573101	-0.532525	DUSP2;PHB;FGFR3;PSMA8
170	SHC1 events in ERBB4 signaling_Homo sapiens_R-HSA-1250347	4/235	0.391822	0.729113	0.405557	0.745883	0.575081	-0.538821	DUSP2;PHB;FGFR3;PSMA8
171	FRS-mediated FGFR3 signaling_Homo sapiens_R-HSA-5654706	4/236	0.39487	0.729113	0.408622	0.745883	0.582326	-0.541097	DUSP2;PHB;FGFR3;PSMA8
172	Influenza Viral RNA Transcription and Replication_Homo sapiens_R-HSA-168273	1/128	0.825417	0.856797	0.829472	0.862431	2.84546	-0.545949	POLR2I
173	SOS-mediated signalling_Homo sapiens_R-HSA-112412	4/235	0.391822	0.729113	0.405557	0.745883	0.582782	-0.546037	DUSP2;PHB;FGFR3;PSMA8
174	FRS-mediated FGFR4 signaling_Homo sapiens_R-HSA-5654712	4/236	0.39487	0.729113	0.408622	0.745883	0.591038	-0.549192	DUSP2;PHB;FGFR3;PSMA8
175	MAPK1/MAPK3 signaling_Homo sapiens_R-HSA-5684996	4/241	0.410072	0.729113	0.423902	0.745883	0.63629	-0.567202	DUSP2;PHB;FGFR3;PSMA8
176	ARMS-mediated activation_Homo sapiens_R-HSA-170984	4/239	0.403999	0.729113	0.4178	0.745883	0.628619	-0.569744	DUSP2;PHB;FGFR3;PSMA8
177	Frs2-mediated activation_Homo sapiens_R-HSA-170968	4/240	0.407037	0.729113	0.420852	0.745883	0.640583	-0.575789	DUSP2;PHB;FGFR3;PSMA8
178	Signaling by the B Cell Receptor (BCR)_Homo sapiens_R-HSA-983705	2/233	0.825214	0.856797	0.831571	0.863184	3.01672	-0.579549	FGFR3;PSMA8
179	Vesicle-mediated transport_Homo sapiens_R-HSA-5653656	5/492	0.797137	0.845611	0.809629	0.852765	2.56776	-0.582187	TJP1;HBB;HBA1;CALR;SLC2A4
180	Metabolism of lipids and lipoproteins_Homo sapiens_R-HSA-556833	7/659	0.790038	0.840921	0.805928	0.852765	2.47507	-0.583312	TEAD4;COQ3;STARD6;CPNE7;INPP5J;PLD4;SGPP2
181	Signalling to p38 via RIT and RIN_Homo sapiens_R-HSA-187706	4/239	0.403999	0.729113	0.4178	0.745883	0.64535	-0.584907	DUSP2;PHB;FGFR3;PSMA8
182	C-type lectin receptors (CLRs)_Homo sapiens_R-HSA-5621481	1/123	0.81306	0.849586	0.817284	0.854	2.85557	-0.590963	PSMA8
183	Glycosaminoglycan metabolism_Homo sapiens_R-HSA-1630316	1/121	0.807876	0.848308	0.81217	0.852765	2.77643	-0.592343	SDC2
184	Signalling to RAS_Homo sapiens_R-HSA-167044	4/246	0.425197	0.729113	0.439089	0.745883	0.697721	-0.596693	DUSP2;PHB;FGFR3;PSMA8
185	Signaling by Leptin_Homo sapiens_R-HSA-2586552	4/243	0.416133	0.729113	0.429989	0.745883	0.683493	-0.599253	DUSP2;PHB;FGFR3;PSMA8
186	GAB1 signalosome_Homo sapiens_R-HSA-180292	1/125	0.818104	0.852022	0.822259	0.85635	2.99347	-0.600987	FGFR3
187	Regulation of TP53 Activity through Phosphorylation_Homo sapiens_R-HSA-6804756	1989-02-01	0.338559	0.727972	0.349337	0.745883	0.555664	-0.601816	NOC2L;CDK5R1
188	Prolonged ERK activation events_Homo sapiens_R-HSA-169893	4/242	0.413104	0.729113	0.426947	0.745883	0.680846	-0.601906	DUSP2;PHB;FGFR3;PSMA8
189	PI3K/AKT activation_Homo sapiens_R-HSA-198203	1/125	0.818104	0.852022	0.822259	0.85635	3.02671	-0.60766	FGFR3
190	Fcgamma receptor (FCGR) dependent phagocytosis_Homo sapiens_R-HSA-2029480	1/120	0.805231	0.848308	0.80956	0.852765	2.82539	-0.612055	PLD4
191	Class I MHC mediated antigen processing & presentation_Homo sapiens_R-HSA-983169	3/305	0.782831	0.838063	0.792045	0.847041	2.53859	-0.621544	CDC20;CALR;PSMA8
192	Interleukin receptor SHC signaling_Homo sapiens_R-HSA-912526	4/245	0.422179	0.729113	0.43606	0.745883	0.721544	-0.622206	DUSP2;PHB;FGFR3;PSMA8
193	VEGFR2 mediated cell proliferation_Homo sapiens_R-HSA-5218921	4/248	0.431221	0.729113	0.445134	0.745883	0.744225	-0.625994	DUSP2;PHB;FGFR3;PSMA8
194	PI-3K cascade:FGFR1_Homo sapiens_R-HSA-5654689	1/122	0.810485	0.848308	0.814744	0.852765	3.00298	-0.630992	FGFR3
195	Regulation of lipid metabolism by Peroxisome proliferator-activated receptor alpha (PPARalpha)_Homo sapiens_R-HSA-400206	1/116	0.794282	0.844008	0.798755	0.850201	2.73993	-0.631052	TEAD4
196	PI-3K cascade:FGFR2_Homo sapiens_R-HSA-5654695	1/122	0.810485	0.848308	0.814744	0.852765	3.01217	-0.632922	FGFR3
197	PI-3K cascade:FGFR3_Homo sapiens_R-HSA-5654710	1/122	0.810485	0.848308	0.814744	0.852765	3.02225	-0.635041	FGFR3
198	PI-3K cascade:FGFR4_Homo sapiens_R-HSA-5654720	1/122	0.810485	0.848308	0.814744	0.852765	3.02977	-0.636621	FGFR3
199	PI3K events in ERBB4 signaling_Homo sapiens_R-HSA-1250342	1/122	0.810485	0.848308	0.814744	0.852765	3.03633	-0.637999	FGFR3
200	PIP3 activates AKT signaling_Homo sapiens_R-HSA-1257604	1/122	0.810485	0.848308	0.814744	0.852765	3.04741	-0.640328	FGFR3
201	Downstream TCR signaling_Homo sapiens_R-HSA-202424	1999-02-01	0.387137	0.729113	0.397847	0.745883	0.685541	-0.650562	CD3E;PSMA8
202	PPARA activates gene expression_Homo sapiens_R-HSA-1989781	1/113	0.78567	0.839117	0.790255	0.846895	2.72242	-0.656698	TEAD4
203	Organelle biogenesis and maintenance_Homo sapiens_R-HSA-1852241	5/326	0.450143	0.729113	0.465574	0.745883	0.827574	-0.660562	IFT22;B9D1;WDR34;KIF17;MRPL54
204	RHO GTPases Activate Formins_Homo sapiens_R-HSA-5663220	1/114	0.78858	0.840795	0.793127	0.847041	2.83916	-0.674362	CDC20
205	FCERI mediated NF-kB activation_Homo sapiens_R-HSA-2871837	1/111	0.77973	0.837043	0.784391	0.843489	2.72782	-0.678704	PSMA8
206	Signaling by Interleukins_Homo sapiens_R-HSA-449147	4/392	0.778339	0.836981	0.789537	0.846895	2.71979	-0.681562	DUSP2;PHB;FGFR3;PSMA8
207	Hemostasis_Homo sapiens_R-HSA-109582	6/552	0.758926	0.820319	0.77401	0.833753	2.50449	-0.690868	HIST2H3A;C1QBP;GATA5;HBB;ATP2A1;HBD
208	Signalling to ERKs_Homo sapiens_R-HSA-187687	4/253	0.446205	0.729113	0.46016	0.745883	0.870858	-0.702762	DUSP2;PHB;FGFR3;PSMA8
209	Fc epsilon receptor (FCERI) signaling_Homo sapiens_R-HSA-2454202	4/395	0.783349	0.838063	0.794438	0.847041	2.89676	-0.707324	DUSP2;PHB;FGFR3;PSMA8
210	Interleukin-2 signaling_Homo sapiens_R-HSA-451927	4/252	0.443217	0.729113	0.457165	0.745883	0.870959	-0.708695	DUSP2;PHB;FGFR3;PSMA8
211	Gene Expression_Homo sapiens_R-HSA-74160	23/1631	0.44517	0.729113	0.477715	0.745883	0.879644	-0.711895	TEAD4;ZNF793;ZNF287;POP7;COX16;ALYREF;RPP40;NOC2L;PSMA8;BOP1;CTU2;HIST2H3A;MYBBP1A;PES1;NHP2;HIST3H2BB;SNRNP25;POLR2I;ZNF610;ZNF114;TRMT61A;ZNF135;CDK5R1
212	Chaperonin-mediated protein folding_Homo sapiens_R-HSA-390466	1995-02-01	0.367874	0.729113	0.378623	0.745883	0.742313	-0.742323	TUBB2B;TUBB2A
213	Mitotic Prometaphase_Homo sapiens_R-HSA-68877	1/107	0.767353	0.826583	0.772172	0.833203	2.80681	-0.743266	CDC20
214	Degradation of the extracellular matrix_Homo sapiens_R-HSA-1474228	1/106	0.764152	0.824549	0.769011	0.83122	2.85223	-0.767216	PRSS2
215	Nucleotide Excision Repair_Homo sapiens_R-HSA-5696398	2/108	0.429487	0.729113	0.440062	0.745883	0.912954	-0.771595	POLD2;POLR2I
216	NCAM signaling for neurite out-growth_Homo sapiens_R-HSA-375165	4/266	0.484553	0.734981	0.498555	0.745883	1.06584	-0.772228	DUSP2;PHB;FGFR3;PSMA8
217	Mitotic Prophase_Homo sapiens_R-HSA-68875	2/107	0.424856	0.729113	0.435448	0.745883	0.912136	-0.780794	HIST2H3A;HIST3H2BB
218	Cell Cycle Checkpoints_Homo sapiens_R-HSA-69620	3/182	0.446441	0.729113	0.458779	0.745883	0.972181	-0.784015	CDC20;HIST3H2BB;PSMA8
219	Visual phototransduction_Homo sapiens_R-HSA-2187338	1997-02-01	0.377537	0.729113	0.388268	0.745883	0.805064	-0.784203	SDC2;STRA6
220	Integration of energy metabolism_Homo sapiens_R-HSA-163685	2/110	0.43869	0.729113	0.449227	0.745883	0.962851	-0.793352	SNAP25;PKLR
221	NGF signalling via TRKA from the plasma membrane_Homo sapiens_R-HSA-187037	4/374	0.746353	0.810735	0.758184	0.822101	2.72067	-0.79595	DUSP2;PHB;FGFR3;PSMA8
222	MHC class II antigen presentation_Homo sapiens_R-HSA-2132295	1/103	0.754284	0.816707	0.759266	0.822101	2.84836	-0.803201	CTSE
223	Processing of Capped Intron-Containing Pre-mRNA_Homo sapiens_R-HSA-72203	3/193	0.484707	0.734981	0.496979	0.745883	1.11348	-0.806395	ALYREF;SNRNP25;POLR2I
224	Hedgehog 'off' state_Homo sapiens_R-HSA-5610787	1999-01-01	0.740483	0.805933	0.745635	0.812949	2.69841	-0.810744	PSMA8
225	Glycerophospholipid biosynthesis_Homo sapiens_R-HSA-1483206	2/102	0.401415	0.729113	0.412087	0.745883	0.891858	-0.814051	CPNE7;PLD4
226	Interleukin-3, 5 and GM-CSF signaling_Homo sapiens_R-HSA-512988	4/261	0.469919	0.734981	0.483914	0.745883	1.07976	-0.815426	DUSP2;PHB;FGFR3;PSMA8
227	Signaling by VEGF_Homo sapiens_R-HSA-194138	5/328	0.455392	0.733584	0.470849	0.745883	1.04434	-0.821475	DUSP2;FLT4;PHB;FGFR3;PSMA8
228	Cytokine Signaling in Immune system_Homo sapiens_R-HSA-1280215	7/620	0.735608	0.805933	0.752814	0.817936	2.6833	-0.823928	DUSP2;LTA;TNFRSF25;PHB;IRF6;FGFR3;PSMA8
229	M Phase_Homo sapiens_R-HSA-68886	4/268	0.490362	0.734981	0.504364	0.745883	1.15675	-0.824316	CDC20;HIST2H3A;HIST3H2BB;PSMA8
230	CLEC7A (Dectin-1) signaling_Homo sapiens_R-HSA-5607764	1999-01-01	0.740483	0.805933	0.745635	0.812949	2.77092	-0.832528	PSMA8
231	Downstream signaling events of B Cell Receptor (BCR)_Homo sapiens_R-HSA-1168372	2/192	0.734646	0.805933	0.742503	0.812949	2.71011	-0.835707	FGFR3;PSMA8
232	Class A/1 (Rhodopsin-like receptors)_Homo sapiens_R-HSA-373076	4/323	0.637205	0.777019	0.650514	0.790195	1.85471	-0.83585	KEL;GAL;APLNR;TRH
233	Protein folding_Homo sapiens_R-HSA-391251	2/101	0.396673	0.729113	0.407358	0.745883	0.908565	-0.840099	TUBB2B;TUBB2A
234	Signalling by NGF_Homo sapiens_R-HSA-166520	5/450	0.729771	0.804028	0.74372	0.812949	2.67459	-0.842561	NGFR;DUSP2;PHB;FGFR3;PSMA8
235	RHO GTPase Effectors_Homo sapiens_R-HSA-195258	3/255	0.671992	0.780983	0.682922	0.790195	2.12543	-0.844879	CDC20;HIST2H3A;HIST3H2BB
236	DNA Repair_Homo sapiens_R-HSA-73894	4/285	0.538572	0.734981	0.552493	0.745883	1.36775	-0.846412	EME1;POLD2;HIST3H2BB;POLR2I
237	Generic Transcription Pathway_Homo sapiens_R-HSA-212436	10/812	0.661261	0.780983	0.684116	0.790195	2.04768	-0.846931	ZNF287;TEAD4;ZNF793;COX16;NOC2L;ZNF610;POLR2I;ZNF114;ZNF135;CDK5R1
238	Infectious disease_Homo sapiens_R-HSA-5663205	5/348	0.507018	0.734981	0.522627	0.745883	1.24995	-0.848976	RANBP1;SNAP25;CALR;POLR2I;PSMA8
239	Transcriptional Regulation by TP53_Homo sapiens_R-HSA-3700989	4/348	0.69416	0.78137	0.706817	0.794062	2.3282	-0.849917	COX16;NOC2L;POLR2I;CDK5R1
240	Cell Cycle_Homo sapiens_R-HSA-1640170	8/566	0.497856	0.734981	0.517607	0.745883	1.22417	-0.853793	CDC20;GINS2;HIST2H3A;RUVBL2;POLD2;NHP2;HIST3H2BB;PSMA8
241	Respiratory electron transport, ATP synthesis by chemiosmotic coupling, and heat production by uncoupling proteins._Homo sapiens_R-HSA-163200	2/109	0.434099	0.729113	0.444655	0.745883	1.02863	-0.858376	COX16;ATP5G1
242	Resolution of Sister Chromatid Cohesion_Homo sapiens_R-HSA-2500257	1999-01-01	0.740483	0.805933	0.745635	0.812949	2.89606	-0.870128	CDC20
243	Transport of glucose and other sugars, bile salts and organic acids, metal ions and amine compounds_Homo sapiens_R-HSA-425366	1/101	0.747477	0.810735	0.752543	0.817936	2.99146	-0.870669	SLC2A4
244	Signaling by PDGF_Homo sapiens_R-HSA-186797	4/364	0.727127	0.802523	0.73929	0.812949	2.74898	-0.875974	DUSP2;PHB;FGFR3;PSMA8
245	DAP12 interactions_Homo sapiens_R-HSA-2172127	4/359	0.717117	0.795601	0.72944	0.809344	2.67685	-0.890094	DUSP2;PHB;FGFR3;PSMA8
246	Signal Transduction_Homo sapiens_R-HSA-162582	31/2465	0.691719	0.78137	0.7431	0.812949	2.44651	-0.901726	SDC2;FLT4;ATP2A1;PHB;TRH;DTX4;FSTL1;PSMA8;CDC20;MDK;HIST3H2BB;POLR2I;OR7D2;HES5;STRA6;FZD1;NGFR;WNT10B;DUSP2;FZD2;FZD9;DLK1;PYGO1;TJP1;KEL;GAL;HIST2H3A;PPP1R1B;APLNR;GAS1;FGFR3
247	MAPK family signaling cascades_Homo sapiens_R-HSA-5683057	4/284	0.535798	0.734981	0.549727	0.745883	1.45939	-0.910658	DUSP2;PHB;FGFR3;PSMA8
248	Signaling by EGFR_Homo sapiens_R-HSA-177929	4/355	0.708918	0.789363	0.721366	0.803223	2.66263	-0.915986	DUSP2;PHB;FGFR3;PSMA8
249	Anchoring of the basal body to the plasma membrane_Homo sapiens_R-HSA-5620912	1997-01-01	0.733296	0.805933	0.738535	0.812949	2.95388	-0.916311	B9D1
250	Mitotic Anaphase_Homo sapiens_R-HSA-68882	2/173	0.680604	0.780983	0.689171	0.790195	2.38364	-0.917164	CDC20;PSMA8
251	EPH-Ephrin signaling_Homo sapiens_R-HSA-2682334	1995-01-01	0.72591	0.802523	0.731238	0.809908	2.8711	-0.919695	SDC2
252	Mitotic Metaphase and Anaphase_Homo sapiens_R-HSA-2555396	2/174	0.683659	0.78137	0.692189	0.790195	2.41886	-0.919883	CDC20;PSMA8
253	Metabolism of water-soluble vitamins and cofactors_Homo sapiens_R-HSA-196849	1998-01-01	0.736914	0.805933	0.742109	0.812949	3.0266	-0.923973	CD320
254	IRS-mediated signalling_Homo sapiens_R-HSA-112399	4/284	0.535798	0.734981	0.549727	0.745883	1.48189	-0.924695	DUSP2;PHB;FGFR3;PSMA8
255	Gastrin-CREB signalling pathway via PKC and MAPK_Homo sapiens_R-HSA-881907	5/432	0.696409	0.781832	0.710882	0.79573	2.55879	-0.925819	DUSP2;PHB;TRH;FGFR3;PSMA8
256	RNA Polymerase I, RNA Polymerase III, and Mitochondrial Transcription_Homo sapiens_R-HSA-504046	2/116	0.465804	0.734981	0.476213	0.745883	1.213	-0.92672	HIST2H3A;HIST3H2BB
257	MAPK6/MAPK4 signaling_Homo sapiens_R-HSA-5687128	1992-01-01	0.714448	0.794113	0.719914	0.80303	2.76054	-0.928217	PSMA8
258	Chromatin modifying enzymes_Homo sapiens_R-HSA-3247509	3/226	0.591019	0.750029	0.602741	0.760824	1.76795	-0.929778	HIST2H3A;RUVBL2;HIST3H2BB
259	RNA Polymerase II Transcription_Homo sapiens_R-HSA-73857	2/124	0.500724	0.734981	0.510932	0.745883	1.34828	-0.932607	ALYREF;POLR2I
260	Chromatin organization_Homo sapiens_R-HSA-4839726	3/226	0.591019	0.750029	0.602741	0.760824	1.77705	-0.934566	HIST2H3A;RUVBL2;HIST3H2BB
261	Signaling by Hedgehog_Homo sapiens_R-HSA-5358351	2/136	0.55028	0.734981	0.560137	0.745883	1.56505	-0.934849	GAS1;PSMA8
262	Transmembrane transport of small molecules_Homo sapiens_R-HSA-382551	8/594	0.552783	0.734981	0.572888	0.746418	1.58964	-0.942324	SLC25A10;SLC4A1;ATP2A1;SLC2A4;SLC4A3;SLC38A5;ABCG2;ADD2
263	Separation of Sister Chromatids_Homo sapiens_R-HSA-2467813	2/162	0.645408	0.780983	0.654378	0.790195	2.15745	-0.944687	CDC20;PSMA8
264	Signaling by ERBB4_Homo sapiens_R-HSA-1236394	4/330	0.653815	0.780983	0.666959	0.790195	2.24292	-0.953084	DUSP2;PHB;FGFR3;PSMA8
265	Disease_Homo sapiens_R-HSA-1643685	10/725	0.517739	0.734981	0.540186	0.745883	1.44852	-0.953536	SNAP25;RANBP1;SDC2;CALR;POLR2I;FGFR3;HES5;PSMA8;CD320;STRA6
266	mRNA Splicing - Major Pathway_Homo sapiens_R-HSA-72163	2/134	0.542263	0.734981	0.552182	0.745883	1.55993	-0.954683	ALYREF;POLR2I
267	Host Interactions of HIV factors_Homo sapiens_R-HSA-162909	2/129	0.521795	0.734981	0.531862	0.745883	1.47425	-0.958969	RANBP1;PSMA8
268	Downstream signal transduction_Homo sapiens_R-HSA-186763	4/341	0.678878	0.780983	0.691735	0.790195	2.48159	-0.961151	DUSP2;PHB;FGFR3;PSMA8
269	Insulin receptor signalling cascade_Homo sapiens_R-HSA-74751	4/287	0.544094	0.734981	0.557997	0.745883	1.57983	-0.961534	DUSP2;PHB;FGFR3;PSMA8
270	Signaling by FGFR1_Homo sapiens_R-HSA-5654736	4/336	0.667645	0.780983	0.680635	0.790195	2.4051	-0.971659	DUSP2;PHB;FGFR3;PSMA8
271	DAP12 signaling_Homo sapiens_R-HSA-2424491	4/344	0.685491	0.78137	0.698264	0.790622	2.57334	-0.971744	DUSP2;PHB;FGFR3;PSMA8
272	Signaling by FGFR2_Homo sapiens_R-HSA-5654738	5/361	0.539523	0.734981	0.555131	0.745883	1.57616	-0.972599	DUSP2;PHB;POLR2I;FGFR3;PSMA8
273	The citric acid (TCA) cycle and respiratory electron transport_Homo sapiens_R-HSA-1428517	2/153	0.614393	0.758107	0.623684	0.769496	1.99927	-0.973886	COX16;ATP5G1
274	IGF1R signaling cascade_Homo sapiens_R-HSA-2428924	4/288	0.546842	0.734981	0.560735	0.745883	1.6188	-0.977098	DUSP2;PHB;FGFR3;PSMA8
275	Interferon gamma signaling_Homo sapiens_R-HSA-877300	1993-01-01	0.718321	0.795601	0.72374	0.80444	2.95593	-0.977934	IRF6
276	IRS-related events triggered by IGF1R_Homo sapiens_R-HSA-2428928	4/288	0.546842	0.734981	0.560735	0.745883	1.62677	-0.981912	DUSP2;PHB;FGFR3;PSMA8
277	FCERI mediated MAPK activation_Homo sapiens_R-HSA-2871796	4/289	0.549582	0.734981	0.563465	0.745883	1.64348	-0.983784	DUSP2;PHB;FGFR3;PSMA8
278	Downstream signaling of activated FGFR1_Homo sapiens_R-HSA-5654687	4/332	0.658467	0.780983	0.671561	0.790195	2.35463	-0.983859	DUSP2;PHB;FGFR3;PSMA8
279	Signaling by FGFR3_Homo sapiens_R-HSA-5654741	4/333	0.660777	0.780983	0.673846	0.790195	2.37469	-0.983925	DUSP2;PHB;FGFR3;PSMA8
280	Influenza Infection_Homo sapiens_R-HSA-168254	2/147	0.592591	0.750029	0.602089	0.760824	1.88269	-0.985119	CALR;POLR2I
281	Regulation of TP53 Activity_Homo sapiens_R-HSA-5633007	2/151	0.607226	0.754048	0.616587	0.766765	1.97879	-0.987128	NOC2L;CDK5R1
282	Signaling by Type 1 Insulin-like Growth Factor 1 Receptor (IGF1R)_Homo sapiens_R-HSA-2404192	4/288	0.546842	0.734981	0.560735	0.745883	1.63682	-0.987976	DUSP2;PHB;FGFR3;PSMA8
283	Signaling by SCF-KIT_Homo sapiens_R-HSA-1433557	4/325	0.642002	0.77984	0.655266	0.790195	2.23185	-0.989075	DUSP2;PHB;FGFR3;PSMA8
284	Influenza Life Cycle_Homo sapiens_R-HSA-168255	2/136	0.55028	0.734981	0.560137	0.745883	1.65787	-0.990295	CALR;POLR2I
285	Late Phase of HIV Life Cycle_Homo sapiens_R-HSA-162599	2/128	0.517628	0.734981	0.527725	0.745883	1.50822	-0.993163	RANBP1;POLR2I
286	Signaling by FGFR4_Homo sapiens_R-HSA-5654743	4/332	0.658467	0.780983	0.671561	0.790195	2.37716	-0.993273	DUSP2;PHB;FGFR3;PSMA8
287	Downstream signaling of activated FGFR2_Homo sapiens_R-HSA-5654696	4/329	0.651473	0.780983	0.664642	0.790195	2.3286	-0.99785	DUSP2;PHB;FGFR3;PSMA8
288	Downstream signaling of activated FGFR3_Homo sapiens_R-HSA-5654708	4/329	0.651473	0.780983	0.664642	0.790195	2.33931	-1.00244	DUSP2;PHB;FGFR3;PSMA8
289	Downstream signaling of activated FGFR4_Homo sapiens_R-HSA-5654716	4/329	0.651473	0.780983	0.664642	0.790195	2.34871	-1.00646	DUSP2;PHB;FGFR3;PSMA8
290	VEGFA-VEGFR2 Pathway_Homo sapiens_R-HSA-4420097	4/320	0.629931	0.772649	0.643307	0.785986	2.18058	-1.00774	DUSP2;PHB;FGFR3;PSMA8
291	Mitochondrial translation_Homo sapiens_R-HSA-5368287	1990-01-01	0.706543	0.788116	0.712102	0.79573	2.93122	-1.01822	MRPL54
292	Metabolism of vitamins and cofactors_Homo sapiens_R-HSA-196854	2/148	0.596288	0.750029	0.605751	0.760824	1.96968	-1.01839	SDC2;CD320
293	Cell Cycle, Mitotic_Homo sapiens_R-HSA-69278	6/462	0.59511	0.750029	0.612204	0.763818	2.00717	-1.04174	CDC20;GINS2;HIST2H3A;POLD2;HIST3H2BB;PSMA8
294	Signaling by Insulin receptor_Homo sapiens_R-HSA-74752	4/311	0.607561	0.754048	0.62112	0.767841	2.09668	-1.04478	DUSP2;PHB;FGFR3;PSMA8
295	Signaling by FGFR_Homo sapiens_R-HSA-190236	5/366	0.551762	0.734981	0.567351	0.745883	1.75811	-1.04544	DUSP2;PHB;POLR2I;FGFR3;PSMA8
296	G2/M Checkpoints_Homo sapiens_R-HSA-69481	2/150	0.603605	0.752344	0.613	0.763818	2.11262	-1.06653	HIST3H2BB;PSMA8
297	HIV Life Cycle_Homo sapiens_R-HSA-162587	2/141	0.569887	0.740971	0.579584	0.753193	1.90164	-1.06933	RANBP1;POLR2I
298	Diseases of glycosylation_Homo sapiens_R-HSA-3781865	1988-01-01	0.69842	0.781832	0.704074	0.792399	2.98122	-1.07006	SDC2
299	HIV Infection_Homo sapiens_R-HSA-162906	3/222	0.578897	0.746504	0.590709	0.75862	1.96262	-1.07283	RANBP1;POLR2I;PSMA8
300	Negative regulation of the PI3K/AKT network_Homo sapiens_R-HSA-199418	1990-01-01	0.706543	0.788116	0.712102	0.79573	3.10711	-1.07932	FGFR3
301	Regulation of mRNA stability by proteins that bind AU-rich elements_Homo sapiens_R-HSA-450531	1986-01-01	0.690072	0.78137	0.695825	0.790195	2.92839	-1.08631	PSMA8
302	PI3K/AKT Signaling in Cancer_Homo sapiens_R-HSA-2219528	1986-01-01	0.690072	0.78137	0.695825	0.790195	2.95092	-1.09467	FGFR3
303	Metabolism of nucleotides_Homo sapiens_R-HSA-15869	1987-01-01	0.694274	0.78137	0.699978	0.790622	3.03327	-1.1068	PFAS
304	Degradation of beta-catenin by the destruction complex_Homo sapiens_R-HSA-195253	1982-01-01	0.672681	0.780983	0.678635	0.790195	2.80286	-1.11129	PSMA8
305	Cell junction organization_Homo sapiens_R-HSA-446728	1986-01-01	0.690072	0.78137	0.695825	0.790195	2.99813	-1.11218	CDH2
306	Mitochondrial translation elongation_Homo sapiens_R-HSA-5389840	1984-01-01	0.681495	0.780983	0.687347	0.790195	2.9037	-1.11347	MRPL54
307	p75 NTR receptor-mediated signalling_Homo sapiens_R-HSA-193704	1983-01-01	0.677118	0.780983	0.683021	0.790195	2.85819	-1.11444	NGFR
308	Mitochondrial translation initiation_Homo sapiens_R-HSA-5368286	1984-01-01	0.681495	0.780983	0.687347	0.790195	2.93654	-1.12607	MRPL54
309	Platelet homeostasis_Homo sapiens_R-HSA-418346	1987-01-01	0.694274	0.78137	0.699978	0.790622	3.09071	-1.12776	ATP2A1
310	Unfolded Protein Response (UPR)_Homo sapiens_R-HSA-381119	1986-01-01	0.690072	0.78137	0.695825	0.790195	3.07319	-1.14003	CALR
311	DNA Replication Pre-Initiation_Homo sapiens_R-HSA-69002	1982-01-01	0.672681	0.780983	0.678635	0.790195	2.87789	-1.14104	PSMA8
312	Global Genome Nucleotide Excision Repair (GG-NER)_Homo sapiens_R-HSA-5696399	1982-01-01	0.672681	0.780983	0.678635	0.790195	2.87831	-1.14121	POLD2
313	M/G1 Transition_Homo sapiens_R-HSA-68874	1982-01-01	0.672681	0.780983	0.678635	0.790195	2.903	-1.151	PSMA8
314	Mitochondrial translation termination_Homo sapiens_R-HSA-5419276	1984-01-01	0.681495	0.780983	0.687347	0.790195	3.00738	-1.15323	MRPL54
315	Opioid Signalling_Homo sapiens_R-HSA-111885	1981-01-01	0.668183	0.780983	0.67419	0.790195	2.861	-1.15353	PPP1R1B
316	Respiratory electron transport_Homo sapiens_R-HSA-611105	1988-01-01	0.69842	0.781832	0.704074	0.792399	3.22202	-1.15649	COX16
317	TP53 Regulates Metabolic Genes_Homo sapiens_R-HSA-5628897	1984-01-01	0.681495	0.780983	0.687347	0.790195	3.03021	-1.16198	COX16
318	Regulation of insulin secretion_Homo sapiens_R-HSA-422356	1980-01-01	0.663624	0.780983	0.669683	0.790195	2.85083	-1.16895	SNAP25
319	G2/M DNA damage checkpoint_Homo sapiens_R-HSA-69473	1978-01-01	0.654317	0.780983	0.660483	0.790195	2.84121	-1.20514	HIST3H2BB
320	Processing of DNA double-strand break ends_Homo sapiens_R-HSA-5693607	1981-01-01	0.668183	0.780983	0.67419	0.790195	2.99761	-1.20861	HIST3H2BB
321	PI5P, PP2A and IER3 Regulate PI3K/AKT Signaling_Homo sapiens_R-HSA-6811558	1983-01-01	0.677118	0.780983	0.683021	0.790195	3.10986	-1.21257	FGFR3
322	Complement cascade_Homo sapiens_R-HSA-166658	1980-01-01	0.663624	0.780983	0.669683	0.790195	2.96705	-1.21661	C1QC
323	PI3K Cascade_Homo sapiens_R-HSA-109704	1979-01-01	0.659002	0.780983	0.665114	0.790195	2.93337	-1.2233	FGFR3
324	Biosynthesis of the N-glycan precursor (dolichol lipid-linked oligosaccharide, LLO) and transfer to a nascent protein_Homo sapiens_R-HSA-446193	1978-01-01	0.654317	0.780983	0.660483	0.790195	2.93674	-1.24566	ST6GALNAC1
325	RNA polymerase II transcribes snRNA genes_Homo sapiens_R-HSA-6807505	1977-01-01	0.649568	0.780983	0.655788	0.790195	2.97833	-1.28499	POLR2I
326	Regulation of DNA replication_Homo sapiens_R-HSA-69304	1975-01-01	0.639874	0.778761	0.646204	0.787993	2.94001	-1.31267	PSMA8
327	Costimulation by the CD28 family_Homo sapiens_R-HSA-388841	1972-01-01	0.624829	0.767892	0.63133	0.775881	2.81892	-1.32567	CD3E
328	Sphingolipid metabolism_Homo sapiens_R-HSA-428157	1974-01-01	0.634927	0.775747	0.641314	0.785078	3.01686	-1.3704	SGPP2
329	Transport of Mature Transcript to Cytoplasm_Homo sapiens_R-HSA-72202	1974-01-01	0.634927	0.775747	0.641314	0.785078	3.02174	-1.37261	ALYREF
330	Removal of licensing factors from origins_Homo sapiens_R-HSA-69300	1972-01-01	0.624829	0.767892	0.63133	0.775881	2.94731	-1.38605	PSMA8
331	Regulation of RAS by GAPs_Homo sapiens_R-HSA-5658442	1967-01-01	0.598351	0.750029	0.60515	0.760824	2.76033	-1.41764	PSMA8
332	Activation of NF-kappaB in B cells_Homo sapiens_R-HSA-1169091	1966-01-01	0.592836	0.750029	0.599697	0.760824	2.77157	-1.44908	PSMA8
333	Cytosolic sensors of pathogen-associated DNA_Homo sapiens_R-HSA-1834949	1966-01-01	0.592836	0.750029	0.599697	0.760824	2.77349	-1.45008	DTX4
334	Orc1 removal from chromatin_Homo sapiens_R-HSA-68949	1970-01-01	0.614453	0.758107	0.621071	0.767841	2.97999	-1.45132	PSMA8
335	Switching of origins to a post-replicative state_Homo sapiens_R-HSA-69052	1970-01-01	0.614453	0.758107	0.621071	0.767841	2.98908	-1.45575	PSMA8
336	Assembly of the pre-replicative complex_Homo sapiens_R-HSA-68867	1967-01-01	0.598351	0.750029	0.60515	0.760824	2.89262	-1.48559	PSMA8
337	Hedgehog ligand biogenesis_Homo sapiens_R-HSA-5358346	1964-01-01	0.581579	0.746895	0.588565	0.757416	2.75611	-1.49384	PSMA8
338	G1/S DNA Damage Checkpoints_Homo sapiens_R-HSA-69615	1965-01-01	0.587246	0.750029	0.594169	0.760824	2.81211	-1.49692	PSMA8
339	Interferon alpha/beta signaling_Homo sapiens_R-HSA-909733	1968-01-01	0.603792	0.752344	0.610529	0.76377	3.00853	-1.51788	IRF6
340	Transcription of the HIV genome_Homo sapiens_R-HSA-167172	1967-01-01	0.598351	0.750029	0.60515	0.760824	2.97823	-1.52955	POLR2I
341	Transport of Mature mRNA derived from an Intron-Containing Transcript_Homo sapiens_R-HSA-159236	1968-01-01	0.603792	0.752344	0.610529	0.76377	3.03588	-1.53168	ALYREF
342	p53-Dependent G1 DNA Damage Response_Homo sapiens_R-HSA-69563	1963-01-01	0.575835	0.744083	0.582885	0.753193	2.79335	-1.54174	PSMA8
343	p53-Dependent G1/S DNA damage checkpoint_Homo sapiens_R-HSA-69580	1963-01-01	0.575835	0.744083	0.582885	0.753193	2.80204	-1.54654	PSMA8
344	Degradation of GLI1 by the proteasome_Homo sapiens_R-HSA-5610780	1959-01-01	0.552061	0.734981	0.559375	0.745883	2.63575	-1.56589	PSMA8
345	Degradation of GLI2 by the proteasome_Homo sapiens_R-HSA-5610783	1959-01-01	0.552061	0.734981	0.559375	0.745883	2.66363	-1.58245	PSMA8
346	GLI3 is processed to GLI3R by the proteasome_Homo sapiens_R-HSA-5610785	1959-01-01	0.552061	0.734981	0.559375	0.745883	2.67578	-1.58967	PSMA8
347	Constitutive Signaling by NOTCH1 HD+PEST Domain Mutants_Homo sapiens_R-HSA-2894862	1957-01-01	0.539681	0.734981	0.547132	0.745883	2.57809	-1.59011	HES5
348	RNA Polymerase II Pre-transcription Events_Homo sapiens_R-HSA-674695	1964-01-01	0.581579	0.746895	0.588565	0.757416	2.93806	-1.59245	POLR2I
349	Constitutive Signaling by NOTCH1 PEST Domain Mutants_Homo sapiens_R-HSA-2644606	1957-01-01	0.539681	0.734981	0.547132	0.745883	2.59055	-1.59779	HES5
350	Hh mutants abrogate ligand secretion_Homo sapiens_R-HSA-5387390	1957-01-01	0.539681	0.734981	0.547132	0.745883	2.5936	-1.59968	PSMA8
351	CDT1 association with the CDC6:ORC:origin complex_Homo sapiens_R-HSA-68827	1958-01-01	0.545913	0.734981	0.553295	0.745883	2.65368	-1.60626	PSMA8
352	The role of GTSE1 in G2/M progression after G2 checkpoint_Homo sapiens_R-HSA-8852276	1959-01-01	0.552061	0.734981	0.559375	0.745883	2.71319	-1.6119	PSMA8
353	Integrin cell surface interactions_Homo sapiens_R-HSA-216083	1967-01-01	0.598351	0.750029	0.60515	0.760824	3.14978	-1.61765	ITGA8
354	Dectin-1 mediated noncanonical NF-kB signaling_Homo sapiens_R-HSA-5607761	1961-01-01	0.564109	0.734981	0.57129	0.745883	2.83101	-1.62078	PSMA8
355	Cell death signalling via NRAGE, NRIF and NADE_Homo sapiens_R-HSA-204998	1961-01-01	0.564109	0.734981	0.57129	0.745883	2.84243	-1.62731	NGFR
356	Degradation of DVL_Homo sapiens_R-HSA-4641258	1956-01-01	0.533364	0.734981	0.540884	0.745883	2.58902	-1.62733	PSMA8
357	Signaling by NOTCH1 HD+PEST Domain Mutants in Cancer_Homo sapiens_R-HSA-2894858	1957-01-01	0.539681	0.734981	0.547132	0.745883	2.63854	-1.62739	HES5
358	NIK-->noncanonical NF-kB signaling_Homo sapiens_R-HSA-5676590	1958-01-01	0.545913	0.734981	0.553295	0.745883	2.69101	-1.62885	PSMA8
359	Signaling by NOTCH1 in Cancer_Homo sapiens_R-HSA-2644603	1957-01-01	0.539681	0.734981	0.547132	0.745883	2.64902	-1.63386	HES5
360	Signaling by NOTCH1 PEST Domain Mutants in Cancer_Homo sapiens_R-HSA-2644602	1957-01-01	0.539681	0.734981	0.547132	0.745883	2.65873	-1.63984	HES5
361	Hh mutants that don't undergo autocatalytic processing are degraded by ERAD_Homo sapiens_R-HSA-5362768	1955-01-01	0.52696	0.734981	0.534551	0.745883	2.56327	-1.64211	PSMA8
362	AUF1 (hnRNP D0) binds and destabilizes mRNA_Homo sapiens_R-HSA-450408	1954-01-01	0.520469	0.734981	0.528131	0.745883	2.52901	-1.6515	PSMA8
363	Recruitment and ATM-mediated phosphorylation of repair and signaling proteins at DNA double strand breaks_Homo sapiens_R-HSA-5693565	1958-01-01	0.545913	0.734981	0.553295	0.745883	2.73843	-1.65756	HIST3H2BB
364	DNA Double Strand Break Response_Homo sapiens_R-HSA-5693606	1959-01-01	0.552061	0.734981	0.559375	0.745883	2.79283	-1.65921	HIST3H2BB
365	Formation of TC-NER Pre-Incision Complex_Homo sapiens_R-HSA-6781823	1953-01-01	0.513889	0.734981	0.521624	0.745883	2.49609	-1.66177	POLR2I
366	Synthesis of substrates in N-glycan biosythesis_Homo sapiens_R-HSA-446219	1963-01-01	0.575835	0.744083	0.582885	0.753193	3.01674	-1.66504	ST6GALNAC1
367	Constitutive Signaling by Aberrant PI3K in Cancer_Homo sapiens_R-HSA-2219530	1961-01-01	0.564109	0.734981	0.57129	0.745883	2.91342	-1.66795	FGFR3
368	TP53 Regulates Transcription of DNA Repair Genes_Homo sapiens_R-HSA-6796648	1961-01-01	0.564109	0.734981	0.57129	0.745883	2.93218	-1.67869	POLR2I
369	Degradation of AXIN_Homo sapiens_R-HSA-4641257	1954-01-01	0.520469	0.734981	0.528131	0.745883	2.58963	-1.6911	PSMA8
370	Stabilization of p53_Homo sapiens_R-HSA-69541	1954-01-01	0.520469	0.734981	0.528131	0.745883	2.61251	-1.70603	PSMA8
371	PI Metabolism_Homo sapiens_R-HSA-1483255	1960-01-01	0.558126	0.734981	0.565373	0.745883	2.93415	-1.71111	INPP5J
372	Vif-mediated degradation of APOBEC3G_Homo sapiens_R-HSA-180585	1953-01-01	0.513889	0.734981	0.521624	0.745883	2.57493	-1.71426	PSMA8
373	Role of phospholipids in phagocytosis_Homo sapiens_R-HSA-2029485	1960-01-01	0.558126	0.734981	0.565373	0.745883	2.97679	-1.73598	PLD4
374	Ca2+ pathway_Homo sapiens_R-HSA-4086398	1961-01-01	0.564109	0.734981	0.57129	0.745883	3.0371	-1.73876	FZD2
375	Cell-cell junction organization_Homo sapiens_R-HSA-421270	1961-01-01	0.564109	0.734981	0.57129	0.745883	3.05727	-1.75031	CDH2
376	Ion homeostasis_Homo sapiens_R-HSA-5578775	1951-01-01	0.500458	0.734981	0.508341	0.745883	2.52997	-1.75133	ATP2A1
377	Autodegradation of the E3 ubiquitin ligase COP1_Homo sapiens_R-HSA-349425	1951-01-01	0.500458	0.734981	0.508341	0.745883	2.53371	-1.75392	PSMA8
378	Meiotic synapsis_Homo sapiens_R-HSA-1221632	1957-01-01	0.539681	0.734981	0.547132	0.745883	2.84377	-1.75397	HIST3H2BB
379	Initial triggering of complement_Homo sapiens_R-HSA-166663	1958-01-01	0.545913	0.734981	0.553295	0.745883	2.90375	-1.75763	C1QC
380	p53-Independent DNA Damage Response_Homo sapiens_R-HSA-69610	1952-01-01	0.507219	0.734981	0.515028	0.745883	2.59752	-1.76323	PSMA8
381	Cleavage of Growing Transcript in the Termination Region_Homo sapiens_R-HSA-109688	1960-01-01	0.558126	0.734981	0.565373	0.745883	3.02745	-1.76552	ALYREF
382	p53-Independent G1/S DNA damage checkpoint_Homo sapiens_R-HSA-69613	1952-01-01	0.507219	0.734981	0.515028	0.745883	2.60654	-1.76935	PSMA8
383	Ubiquitin Mediated Degradation of Phosphorylated Cdc25A_Homo sapiens_R-HSA-69601	1952-01-01	0.507219	0.734981	0.515028	0.745883	2.61318	-1.77386	PSMA8
384	Post-Elongation Processing of the Transcript_Homo sapiens_R-HSA-76044	1960-01-01	0.558126	0.734981	0.565373	0.745883	3.04803	-1.77752	ALYREF
385	RNA Polymerase II Transcription Termination_Homo sapiens_R-HSA-73856	1960-01-01	0.558126	0.734981	0.565373	0.745883	3.05734	-1.78295	ALYREF
386	Vpu mediated degradation of CD4_Homo sapiens_R-HSA-180534	1951-01-01	0.500458	0.734981	0.508341	0.745883	2.5766	-1.7836	PSMA8
387	Ubiquitin-dependent degradation of Cyclin D1_Homo sapiens_R-HSA-69229	1950-01-01	0.493604	0.734981	0.501563	0.745883	2.5265	-1.78376	PSMA8
388	Ubiquitin-dependent degradation of Cyclin D_Homo sapiens_R-HSA-75815	1950-01-01	0.493604	0.734981	0.501563	0.745883	2.54266	-1.79517	PSMA8
389	Regulation of Apoptosis_Homo sapiens_R-HSA-169911	1950-01-01	0.493604	0.734981	0.501563	0.745883	2.56253	-1.8092	PSMA8
390	rRNA modification in the nucleus_Homo sapiens_R-HSA-6790901	1958-01-01	0.545913	0.734981	0.553295	0.745883	3.00684	-1.82003	NHP2
391	CDK-mediated phosphorylation and removal of Cdc6_Homo sapiens_R-HSA-69017	1950-01-01	0.493604	0.734981	0.501563	0.745883	2.57992	-1.82147	PSMA8
392	Regulation of activated PAK-2p34 by proteasome mediated degradation_Homo sapiens_R-HSA-211733	1949-01-01	0.486657	0.734981	0.494692	0.745883	2.55643	-1.84113	PSMA8
393	Translocation of GLUT4 to the plasma membrane_Homo sapiens_R-HSA-1445148	1960-01-01	0.558126	0.734981	0.565373	0.745883	3.16299	-1.84456	SLC2A4
394	ECM proteoglycans_Homo sapiens_R-HSA-3000178	1955-01-01	0.52696	0.734981	0.534551	0.745883	2.89406	-1.85402	ITGA8
395	Heparan sulfate/heparin (HS-GAG) metabolism_Homo sapiens_R-HSA-1638091	1954-01-01	0.520469	0.734981	0.528131	0.745883	2.8438	-1.85707	SDC2
396	Ion transport by P-type ATPases_Homo sapiens_R-HSA-936837	1955-01-01	0.52696	0.734981	0.534551	0.745883	2.91326	-1.86632	ATP2A1
397	Deposition of new CENPA-containing nucleosomes at the centromere_Homo sapiens_R-HSA-606279	1952-01-01	0.507219	0.734981	0.515028	0.745883	2.75901	-1.87285	HIST3H2BB
398	DNA Damage Bypass_Homo sapiens_R-HSA-73893	1946-01-01	0.465241	0.734981	0.473511	0.745883	2.4493	-1.8742	POLD2
399	Nucleosome assembly_Homo sapiens_R-HSA-774815	1952-01-01	0.507219	0.734981	0.515028	0.745883	2.78329	-1.88933	HIST3H2BB
400	Cross-presentation of soluble exogenous antigens (endosomes)_Homo sapiens_R-HSA-1236978	1949-01-01	0.486657	0.734981	0.494692	0.745883	2.6323	-1.89577	PSMA8
401	Signaling by FGFR2 in disease_Homo sapiens_R-HSA-5655253	1943-01-01	0.442935	0.729113	0.45145	0.745883	2.34428	-1.90902	POLR2I
402	Nonhomologous End-Joining (NHEJ)_Homo sapiens_R-HSA-5693571	1952-01-01	0.507219	0.734981	0.515028	0.745883	2.8143	-1.91038	HIST3H2BB
403	NOTCH1 Intracellular Domain Regulates Transcription_Homo sapiens_R-HSA-2122947	1947-01-01	0.472477	0.734981	0.480667	0.745883	2.57713	-1.93225	HES5
404	FGFR3b ligand binding and activation_Homo sapiens_R-HSA-190371	2018-01-07	0.0907708	0.727787	0.103233	0.745883	0.808169	-1.93913	FGFR3
405	Pre-NOTCH Expression and Processing_Homo sapiens_R-HSA-1912422	1957-01-01	0.539681	0.734981	0.547132	0.745883	3.14652	-1.9407	ATP2A1
406	Deactivation of the beta-catenin transactivating complex_Homo sapiens_R-HSA-3769402	1942-01-01	0.435295	0.729113	0.443894	0.745883	2.34568	-1.95098	PYGO1
407	Neurotransmitter Release Cycle_Homo sapiens_R-HSA-112310	1951-01-01	0.500458	0.734981	0.508341	0.745883	2.8276	-1.95736	SNAP25
408	mRNA 3'-end processing_Homo sapiens_R-HSA-72187	1951-01-01	0.500458	0.734981	0.508341	0.745883	2.85281	-1.97481	ALYREF
409	Metabolism of fat-soluble vitamins_Homo sapiens_R-HSA-6806667	1951-01-01	0.500458	0.734981	0.508341	0.745883	2.85505	-1.97635	SDC2
410	Post-Elongation Processing of Intron-Containing pre-mRNA_Homo sapiens_R-HSA-112296	1951-01-01	0.500458	0.734981	0.508341	0.745883	2.87615	-1.99096	ALYREF
411	Hexose transport_Homo sapiens_R-HSA-189200	1948-01-01	0.479615	0.734981	0.487727	0.745883	2.73246	-2.00773	SLC2A4
412	Negative regulation of MAPK pathway_Homo sapiens_R-HSA-5675221	1940-01-01	0.419701	0.729113	0.428472	0.745883	2.31676	-2.01144	DUSP2
413	Creation of C4 and C2 activators_Homo sapiens_R-HSA-166786	1949-01-01	0.486657	0.734981	0.494692	0.745883	2.79298	-2.01149	C1QC
414	Viral Messenger RNA Synthesis_Homo sapiens_R-HSA-168325	1942-01-01	0.435295	0.729113	0.443894	0.745883	2.52034	-2.09624	POLR2I
415	Formation of HIV elongation complex in the absence of HIV Tat_Homo sapiens_R-HSA-167152	1944-01-01	0.450471	0.729113	0.458904	0.745883	2.62886	-2.09641	POLR2I
416	Formation of RNA Pol II elongation complex_Homo sapiens_R-HSA-112382	1944-01-01	0.450471	0.729113	0.458904	0.745883	2.62934	-2.0968	POLR2I
417	Chondroitin sulfate/dermatan sulfate metabolism_Homo sapiens_R-HSA-1793185	1950-01-01	0.493604	0.734981	0.501563	0.745883	2.98619	-2.10831	SDC2
418	HIV Transcription Initiation_Homo sapiens_R-HSA-167161	1944-01-01	0.450471	0.729113	0.458904	0.745883	2.65462	-2.11696	POLR2I
419	Formation of HIV-1 elongation complex containing HIV-1 Tat_Homo sapiens_R-HSA-167200	1943-01-01	0.442935	0.729113	0.45145	0.745883	2.62779	-2.1399	POLR2I
420	Phospholipase C-mediated cascade; FGFR3_Homo sapiens_R-HSA-5654227	1944-01-01	0.450471	0.729113	0.458904	0.745883	2.68468	-2.14093	FGFR3
421	RNA Polymerase II HIV Promoter Escape_Homo sapiens_R-HSA-167162	1944-01-01	0.450471	0.729113	0.458904	0.745883	2.6869	-2.1427	POLR2I
422	RNA Polymerase II Transcription Elongation_Homo sapiens_R-HSA-75955	1944-01-01	0.450471	0.729113	0.458904	0.745883	2.6885	-2.14397	POLR2I
423	RNA Polymerase II Promoter Escape_Homo sapiens_R-HSA-73776	1944-01-01	0.450471	0.729113	0.458904	0.745883	2.68983	-2.14503	POLR2I
424	HIV Transcription Elongation_Homo sapiens_R-HSA-167169	1943-01-01	0.442935	0.729113	0.45145	0.745883	2.64466	-2.15363	POLR2I
425	RMTs methylate histone arginines_Homo sapiens_R-HSA-3214858	1945-01-01	0.457906	0.733584	0.466257	0.745883	2.76879	-2.16268	HIST2H3A
426	RNA Polymerase II Transcription Initiation And Promoter Clearance_Homo sapiens_R-HSA-76042	1944-01-01	0.450471	0.729113	0.458904	0.745883	2.71263	-2.16321	POLR2I
427	RNA Polymerase II Transcription Initiation_Homo sapiens_R-HSA-75953	1944-01-01	0.450471	0.729113	0.458904	0.745883	2.73403	-2.18028	POLR2I
428	RNA Polymerase II Transcription Pre-Initiation And Promoter Opening_Homo sapiens_R-HSA-73779	1944-01-01	0.450471	0.729113	0.458904	0.745883	2.73582	-2.18171	POLR2I
429	Tat-mediated elongation of the HIV-1 transcript_Homo sapiens_R-HSA-167246	1943-01-01	0.442935	0.729113	0.45145	0.745883	2.68062	-2.18292	POLR2I
430	EPHB-mediated forward signaling_Homo sapiens_R-HSA-3928662	1942-01-01	0.435295	0.729113	0.443894	0.745883	2.62773	-2.18557	SDC2
431	Translesion synthesis by Y family DNA polymerases bypasses lesions on DNA template_Homo sapiens_R-HSA-110313	1937-01-01	0.395503	0.729113	0.40454	0.745883	2.36497	-2.19374	POLD2
432	Diseases of metabolism_Homo sapiens_R-HSA-5668914	1945-01-01	0.457906	0.733584	0.466257	0.745883	2.8181	-2.20119	CD320
433	Dual Incision in GG-NER_Homo sapiens_R-HSA-5696400	1939-01-01	0.411744	0.729113	0.420602	0.745883	2.48832	-2.20802	POLD2
434	Glucose transport_Homo sapiens_R-HSA-70153	1942-01-01	0.435295	0.729113	0.443894	0.745883	2.66646	-2.21778	SLC2A4
435	Defensins_Homo sapiens_R-HSA-1461973	1947-01-01	0.472477	0.734981	0.480667	0.745883	2.97177	-2.22813	PRSS2
436	Classical antibody-mediated complement activation_Homo sapiens_R-HSA-173623	1943-01-01	0.442935	0.729113	0.45145	0.745883	2.76824	-2.25427	C1QC
437	NRAGE signals death through JNK_Homo sapiens_R-HSA-193648	1945-01-01	0.457906	0.733584	0.466257	0.745883	2.89783	-2.26347	NGFR
438	Retinoid metabolism and transport_Homo sapiens_R-HSA-975634	1942-01-01	0.435295	0.729113	0.443894	0.745883	2.74878	-2.28625	SDC2
439	Fanconi Anemia Pathway_Homo sapiens_R-HSA-6783310	1935-01-01	0.378815	0.729113	0.388035	0.745883	2.35987	-2.29074	EME1
440	FGFR2 mutant receptor activation_Homo sapiens_R-HSA-1839126	1933-01-01	0.361668	0.727972	0.371077	0.745883	2.32069	-2.36021	POLR2I
441	Transcriptional regulation of pluripotent stem cells_Homo sapiens_R-HSA-452723	1942-01-01	0.435295	0.729113	0.443894	0.745883	2.89035	-2.40399	POLR2I
442	Interactions of Rev with host cellular proteins_Homo sapiens_R-HSA-177243	1935-01-01	0.378815	0.729113	0.388035	0.745883	2.49531	-2.42222	RANBP1
443	Recognition of DNA damage by PCNA-containing replication complex_Homo sapiens_R-HSA-110314	2018-01-28	0.316708	0.727972	0.326616	0.745883	2.10954	-2.42549	POLD2
444	PKMTs methylate histone lysines_Homo sapiens_R-HSA-3214841	1940-01-01	0.419701	0.729113	0.428472	0.745883	2.79475	-2.42643	HIST2H3A
445	Transport of Mature mRNAs Derived from Intronless Transcripts_Homo sapiens_R-HSA-159234	1938-01-01	0.403679	0.729113	0.412626	0.745883	2.67564	-2.42717	ALYREF
446	Iron uptake and transport_Homo sapiens_R-HSA-917937	1943-01-01	0.442935	0.729113	0.45145	0.745883	2.98846	-2.4336	ABCG2
447	Transport of Mature mRNA Derived from an Intronless Transcript_Homo sapiens_R-HSA-159231	1937-01-01	0.395503	0.729113	0.40454	0.745883	2.66016	-2.46756	ALYREF
448	Termination of translesion DNA synthesis_Homo sapiens_R-HSA-5656169	2018-01-30	0.335059	0.727972	0.344763	0.745883	2.28457	-2.49806	POLD2
449	Negative regulation of FGFR3 signaling_Homo sapiens_R-HSA-5654732	2018-01-29	0.325946	0.727972	0.335751	0.745883	2.2405	-2.51165	FGFR3
450	APC/C:Cdc20 mediated degradation of Cyclin B_Homo sapiens_R-HSA-174048	2018-01-23	0.268595	0.727787	0.279038	0.745883	1.92853	-2.53515	CDC20
451	APC-Cdc20 mediated degradation of Nek2A_Homo sapiens_R-HSA-179409	2018-01-25	0.288233	0.727972	0.298457	0.745883	2.04237	-2.54068	CDC20
452	Rev-mediated nuclear export of HIV RNA_Homo sapiens_R-HSA-165054	1933-01-01	0.361668	0.727972	0.371077	0.745883	2.51454	-2.55736	RANBP1
453	Signaling by FGFR3 in disease_Homo sapiens_R-HSA-5655332	2018-01-22	0.258575	0.727787	0.26913	0.745883	1.893	-2.56042	FGFR3
454	Steroid hormones_Homo sapiens_R-HSA-209943	1937-01-01	0.395503	0.729113	0.40454	0.745883	2.76165	-2.5617	STARD6
455	Signaling by FGFR3 point mutants in cancer_Homo sapiens_R-HSA-8853338	2018-01-22	0.258575	0.727787	0.26913	0.745883	1.90749	-2.58002	FGFR3
456	Glutamate Binding, Activation of AMPA Receptors and Synaptic Plasticity_Homo sapiens_R-HSA-399721	2018-01-31	0.344049	0.727972	0.353653	0.745883	2.42091	-2.58304	TSPAN7
457	Transport of the SLBP Dependant Mature mRNA_Homo sapiens_R-HSA-159230	1934-01-01	0.370299	0.729113	0.379614	0.745883	2.64299	-2.62566	ALYREF
458	Collagen degradation_Homo sapiens_R-HSA-1442490	1939-01-01	0.411744	0.729113	0.420602	0.745883	2.96595	-2.63184	PRSS2
459	Transport of the SLBP independent Mature mRNA_Homo sapiens_R-HSA-159227	1933-01-01	0.361668	0.727972	0.371077	0.745883	2.60533	-2.6497	ALYREF
460	Trafficking of AMPA receptors_Homo sapiens_R-HSA-399719	2018-01-31	0.344049	0.727972	0.353653	0.745883	2.49883	-2.66618	TSPAN7
461	Gamma carboxylation, hypusine formation and arylsulfatase activation_Homo sapiens_R-HSA-163841	1939-01-01	0.411744	0.729113	0.420602	0.745883	3.01545	-2.67576	DPH2
462	Base Excision Repair_Homo sapiens_R-HSA-73884	1935-01-01	0.378815	0.729113	0.388035	0.745883	2.75672	-2.67597	POLD2
463	Elongation arrest and recovery_Homo sapiens_R-HSA-112387	1932-01-01	0.352918	0.727972	0.362424	0.745883	2.57577	-2.68271	POLR2I
464	Formation of the Early Elongation Complex_Homo sapiens_R-HSA-113418	1933-01-01	0.361668	0.727972	0.371077	0.745883	2.64617	-2.69123	POLR2I
465	Formation of the HIV-1 Early Elongation Complex_Homo sapiens_R-HSA-167158	1933-01-01	0.361668	0.727972	0.371077	0.745883	2.65733	-2.70258	POLR2I
466	Striated Muscle Contraction_Homo sapiens_R-HSA-390522	1934-01-01	0.370299	0.729113	0.379614	0.745883	2.73256	-2.71465	DES
467	p75NTR signals via NF-kB_Homo sapiens_R-HSA-193639	2018-01-16	0.195515	0.727787	0.20678	0.745883	1.66495	-2.71739	NGFR
468	Resolution of Abasic Sites (AP sites)_Homo sapiens_R-HSA-73933	1935-01-01	0.378815	0.729113	0.388035	0.745883	2.8043	-2.72215	POLD2
469	HIV elongation arrest and recovery_Homo sapiens_R-HSA-167287	1932-01-01	0.352918	0.727972	0.362424	0.745883	2.62892	-2.73807	POLR2I
470	Gap-filling DNA repair synthesis and ligation in GG-NER_Homo sapiens_R-HSA-5696397	2018-01-23	0.268595	0.727787	0.279038	0.745883	2.09379	-2.75239	POLD2
471	Formation of Fibrin Clot (Clotting Cascade)_Homo sapiens_R-HSA-140877	1939-01-01	0.411744	0.729113	0.420602	0.745883	3.10212	-2.75267	C1QBP
472	Pausing and recovery of HIV elongation_Homo sapiens_R-HSA-167290	1932-01-01	0.352918	0.727972	0.362424	0.745883	2.64322	-2.75297	POLR2I
473	Synthesis of PIPs at the plasma membrane_Homo sapiens_R-HSA-1660499	1934-01-01	0.370299	0.729113	0.379614	0.745883	2.77451	-2.75632	INPP5J
474	Resolution of D-Loop Structures_Homo sapiens_R-HSA-5693537	1933-01-01	0.361668	0.727972	0.371077	0.745883	2.71256	-2.75876	EME1
475	NOTCH2 Activation and Transmission of Signal to the Nucleus_Homo sapiens_R-HSA-2979096	2018-01-21	0.248418	0.727787	0.259087	0.745883	1.9926	-2.77497	MDK
476	Pausing and recovery of Tat-mediated HIV elongation_Homo sapiens_R-HSA-167238	2018-01-31	0.344049	0.727972	0.353653	0.745883	2.62888	-2.80495	POLR2I
477	NF-kB is activated and signals survival_Homo sapiens_R-HSA-209560	2018-01-13	0.16201	0.727787	0.173655	0.745883	1.54476	-2.81162	NGFR
478	Packaging Of Telomere Ends_Homo sapiens_R-HSA-171306	2018-01-31	0.344049	0.727972	0.353653	0.745883	2.63771	-2.81436	HIST3H2BB
479	HS-GAG biosynthesis_Homo sapiens_R-HSA-2022928	2018-01-31	0.344049	0.727972	0.353653	0.745883	2.64229	-2.81925	SDC2
480	Tat-mediated HIV elongation arrest and recovery_Homo sapiens_R-HSA-167243	2018-01-31	0.344049	0.727972	0.353653	0.745883	2.64911	-2.82652	POLR2I
481	Phosphorylation of Emi1_Homo sapiens_R-HSA-176417	2018-01-06	0.0783244	0.727787	0.0909312	0.745883	1.12244	-2.85875	CDC20
482	SHC-mediated cascade:FGFR3_Homo sapiens_R-HSA-5654704	2018-01-18	0.217108	0.727787	0.228128	0.745883	1.87926	-2.8703	FGFR3
483	Adherens junctions interactions_Homo sapiens_R-HSA-418990	2018-01-31	0.344049	0.727972	0.353653	0.745883	2.69422	-2.87466	CDH2
484	Amino acid transport across the plasma membrane_Homo sapiens_R-HSA-352230	2018-01-31	0.344049	0.727972	0.353653	0.745883	2.70718	-2.88849	SLC38A5
485	Activation of Matrix Metalloproteinases_Homo sapiens_R-HSA-1592389	1932-01-01	0.352918	0.727972	0.362424	0.745883	2.78643	-2.90212	PRSS2
486	Regulation of beta-cell development_Homo sapiens_R-HSA-186712	1932-01-01	0.352918	0.727972	0.362424	0.745883	2.78712	-2.90284	PKLR
487	Molecules associated with elastic fibres_Homo sapiens_R-HSA-2129379	2018-01-30	0.335059	0.727972	0.344763	0.745883	2.66314	-2.91201	ITGA8
488	Resolution of D-loop Structures through Holliday Junction Intermediates_Homo sapiens_R-HSA-5693568	1932-01-01	0.352918	0.727972	0.362424	0.745883	2.80462	-2.92107	EME1
489	Purine metabolism_Homo sapiens_R-HSA-73847	1934-01-01	0.370299	0.729113	0.379614	0.745883	2.96302	-2.9436	PFAS
490	Signaling by Robo receptor_Homo sapiens_R-HSA-376176	1932-01-01	0.352918	0.727972	0.362424	0.745883	2.84289	-2.96093	CAP2
491	mRNA Capping_Homo sapiens_R-HSA-72086	2018-01-29	0.325946	0.727972	0.335751	0.745883	2.69245	-3.01831	POLR2I
492	FGFR2 alternative splicing_Homo sapiens_R-HSA-6803529	2018-01-26	0.297854	0.727972	0.30797	0.745883	2.50916	-3.03898	POLR2I
493	Gluconeogenesis_Homo sapiens_R-HSA-70263	1932-01-01	0.352918	0.727972	0.362424	0.745883	2.92205	-3.04337	SLC25A10
494	Regulation of innate immune responses to cytosolic DNA_Homo sapiens_R-HSA-3134975	2018-01-15	0.184498	0.727787	0.195887	0.745883	1.80093	-3.04378	DTX4
495	ZBP1(DAI) mediated induction of type I IFNs_Homo sapiens_R-HSA-1606322	2018-01-26	0.297854	0.727972	0.30797	0.745883	2.51556	-3.04673	DTX4
496	Platelet calcium homeostasis_Homo sapiens_R-HSA-418360	2018-01-27	0.307345	0.727972	0.317356	0.745883	2.59586	-3.06255	ATP2A1
497	Metabolism of steroid hormones_Homo sapiens_R-HSA-196071	2018-01-30	0.335059	0.727972	0.344763	0.745883	2.80532	-3.06748	STARD6
498	Syndecan interactions_Homo sapiens_R-HSA-3000170	2018-01-20	0.238122	0.727787	0.248907	0.745883	2.15507	-3.09246	SDC2
499	NRIF signals cell death from the nucleus_Homo sapiens_R-HSA-205043	2018-01-15	0.184498	0.727787	0.195887	0.745883	1.83031	-3.09343	NGFR
500	Sphingolipid de novo biosynthesis_Homo sapiens_R-HSA-1660661	1933-01-01	0.361668	0.727972	0.371077	0.745883	3.0627	-3.11486	SGPP2
501	Signaling by FGFR3 fusions in cancer_Homo sapiens_R-HSA-8853334	2018-01-10	0.127114	0.727787	0.139158	0.745883	1.51975	-3.13474	FGFR3
502	Inactivation of APC/C via direct inhibition of the APC/C complex_Homo sapiens_R-HSA-141430	2018-01-20	0.238122	0.727787	0.248907	0.745883	2.18632	-3.13731	CDC20
503	Mitotic Spindle Checkpoint_Homo sapiens_R-HSA-69618	2018-01-21	0.248418	0.727787	0.259087	0.745883	2.25514	-3.14061	CDC20
504	RNA Pol II CTD phosphorylation and interaction with CE_Homo sapiens_R-HSA-167160	2018-01-27	0.307345	0.727972	0.317356	0.745883	2.6717	-3.15203	POLR2I
505	PIWI-interacting RNA (piRNA) biogenesis_Homo sapiens_R-HSA-5601884	2018-01-29	0.325946	0.727972	0.335751	0.745883	2.82313	-3.1648	POLR2I
506	Gap junction trafficking and regulation_Homo sapiens_R-HSA-157858	2018-01-30	0.335059	0.727972	0.344763	0.745883	2.89612	-3.16676	TJP1
507	Sialic acid metabolism_Homo sapiens_R-HSA-4085001	1933-01-01	0.361668	0.727972	0.371077	0.745883	3.11499	-3.16803	ST6GALNAC1
508	CDO in myogenesis_Homo sapiens_R-HSA-375170	2018-01-29	0.325946	0.727972	0.335751	0.745883	2.83678	-3.18009	CDH2
509	Inhibition of the proteolytic activity of APC/C required for the onset of anaphase by mitotic spindle checkpoint components_Homo sapiens_R-HSA-141405	2018-01-20	0.238122	0.727787	0.248907	0.745883	2.22285	-3.18972	CDC20
510	RAF-independent MAPK1/3 activation_Homo sapiens_R-HSA-112409	2018-01-23	0.268595	0.727787	0.279038	0.745883	2.4276	-3.1912	DUSP2
511	RNA Pol II CTD phosphorylation and interaction with CE_Homo sapiens_R-HSA-77075	2018-01-27	0.307345	0.727972	0.317356	0.745883	2.70491	-3.19121	POLR2I
512	YAP1- and WWTR1 (TAZ)-stimulated gene expression_Homo sapiens_R-HSA-2032785	2018-01-29	0.325946	0.727972	0.335751	0.745883	2.84825	-3.19296	TEAD4
513	Glycolysis_Homo sapiens_R-HSA-70171	1932-01-01	0.352918	0.727972	0.362424	0.745883	3.07803	-3.20583	PKLR
514	Myogenesis_Homo sapiens_R-HSA-525793	2018-01-29	0.325946	0.727972	0.335751	0.745883	2.87337	-3.22112	CDH2
515	Antigen Presentation: Folding, assembly and peptide loading of class I MHC_Homo sapiens_R-HSA-983170	2018-01-25	0.288233	0.727972	0.298457	0.745883	2.60214	-3.23702	CALR
516	Diseases associated with glycosaminoglycan metabolism_Homo sapiens_R-HSA-3560782	2018-01-26	0.297854	0.727972	0.30797	0.745883	2.71557	-3.28897	SDC2
517	Dopamine Neurotransmitter Release Cycle_Homo sapiens_R-HSA-212676	2018-01-23	0.268595	0.727787	0.279038	0.745883	2.51521	-3.30637	SNAP25
518	FGFR3 mutant receptor activation_Homo sapiens_R-HSA-2033514	2018-01-12	0.150535	0.727787	0.162311	0.745883	1.74996	-3.31366	FGFR3
519	FGFR3 ligand binding and activation_Homo sapiens_R-HSA-190239	2018-01-13	0.16201	0.727787	0.173655	0.745883	1.82715	-3.32559	FGFR3
520	Glutamate Neurotransmitter Release Cycle_Homo sapiens_R-HSA-210500	2018-01-24	0.278481	0.727972	0.288813	0.745883	2.60328	-3.32805	SNAP25
521	Phase 1 - inactivation of fast Na+ channels_Homo sapiens_R-HSA-5576894	2018-01-27	0.307345	0.727972	0.317356	0.745883	2.82503	-3.33293	KCNIP3
522	Uptake and actions of bacterial toxins_Homo sapiens_R-HSA-5339562	2018-01-27	0.307345	0.727972	0.317356	0.745883	2.84941	-3.36169	SNAP25
523	DARPP-32 events_Homo sapiens_R-HSA-180024	2018-01-24	0.278481	0.727972	0.288813	0.745883	2.64888	-3.38634	PPP1R1B
524	RAF activation_Homo sapiens_R-HSA-5673000	2018-01-25	0.288233	0.727972	0.298457	0.745883	2.73756	-3.4055	PHB
525	FGFR3c ligand binding and activation_Homo sapiens_R-HSA-190372	2018-01-13	0.16201	0.727787	0.173655	0.745883	1.87951	-3.42089	FGFR3
526	Conversion from APC/C:Cdc20 to APC/C:Cdh1 in late anaphase_Homo sapiens_R-HSA-176407	2018-01-19	0.227686	0.727787	0.238588	0.745883	2.32618	-3.44225	CDC20
527	p75NTR recruits signalling complexes_Homo sapiens_R-HSA-209543	2018-01-13	0.16201	0.727787	0.173655	0.745883	1.89742	-3.4535	NGFR
528	Abortive elongation of HIV-1 transcript in the absence of Tat_Homo sapiens_R-HSA-167242	2018-01-23	0.268595	0.727787	0.279038	0.745883	2.6398	-3.47016	POLR2I
529	A tetrasaccharide linker sequence is required for GAG synthesis_Homo sapiens_R-HSA-1971475	2018-01-26	0.297854	0.727972	0.30797	0.745883	2.87385	-3.48067	SDC2
530	Trafficking of GluR2-containing AMPA receptors_Homo sapiens_R-HSA-416993	2018-01-17	0.206385	0.727787	0.217527	0.745883	2.20936	-3.4864	TSPAN7
531	Signaling by BMP_Homo sapiens_R-HSA-201451	2018-01-23	0.268595	0.727787	0.279038	0.745883	2.65601	-3.49146	FSTL1
532	PD-1 signaling_Homo sapiens_R-HSA-389948	2018-01-26	0.297854	0.727972	0.30797	0.745883	2.92232	-3.53938	CD3E
533	Signaling by activated point mutants of FGFR3_Homo sapiens_R-HSA-1839130	2018-01-12	0.150535	0.727787	0.162311	0.745883	1.87259	-3.54585	FGFR3
534	HDMs demethylate histones_Homo sapiens_R-HSA-3214842	2018-01-25	0.288233	0.727972	0.298457	0.745883	2.85102	-3.54663	HIST2H3A
535	NADE modulates death signalling_Homo sapiens_R-HSA-205025	2018-01-06	0.0783244	0.727787	0.0909312	0.745883	1.39269	-3.54704	NGFR
536	Regulation of gene expression in beta cells_Homo sapiens_R-HSA-210745	2018-01-20	0.238122	0.727787	0.248907	0.745883	2.4888	-3.57135	PKLR
537	Resolution of AP sites via the multiple-nucleotide patch replacement pathway_Homo sapiens_R-HSA-110373	2018-01-22	0.258575	0.727787	0.26913	0.745883	2.66907	-3.61011	POLD2
538	WNT ligand biogenesis and trafficking_Homo sapiens_R-HSA-3238698	2018-01-26	0.297854	0.727972	0.30797	0.745883	3.01665	-3.65363	WNT10B
539	Sulfide oxidation to sulfate_Homo sapiens_R-HSA-1614517	2018-01-05	0.0657083	0.727787	0.0784615	0.745883	1.34493	-3.66161	SLC25A10
540	The canonical retinoid cycle in rods (twilight vision)_Homo sapiens_R-HSA-2453902	2018-01-23	0.268595	0.727787	0.279038	0.745883	2.7891	-3.66642	STRA6
541	Activation of SMO_Homo sapiens_R-HSA-5635838	2018-01-18	0.217108	0.727787	0.228128	0.745883	2.42303	-3.70084	GAS1
542	Phosphorylation of CD3 and TCR zeta chains_Homo sapiens_R-HSA-202427	2018-01-24	0.278481	0.727972	0.288813	0.745883	2.93154	-3.7477	CD3E
543	Axonal growth inhibition (RHOA activation)_Homo sapiens_R-HSA-193634	2018-01-08	0.10305	0.727787	0.115371	0.745883	1.66408	-3.78169	NGFR
544	Laminin interactions_Homo sapiens_R-HSA-3000157	2018-01-23	0.268595	0.727787	0.279038	0.745883	2.8795	-3.78525	LAMC3
545	Sulfur amino acid metabolism_Homo sapiens_R-HSA-1614635	2018-01-25	0.288233	0.727972	0.298457	0.745883	3.04866	-3.7925	SLC25A10
546	Norepinephrine Neurotransmitter Release Cycle_Homo sapiens_R-HSA-181430	2018-01-18	0.217108	0.727787	0.228128	0.745883	2.49346	-3.80841	SNAP25
547	Intrinsic Pathway of Fibrin Clot Formation_Homo sapiens_R-HSA-140837	2018-01-22	0.258575	0.727787	0.26913	0.745883	2.81952	-3.8136	C1QBP
548	ATF6-alpha activates chaperones_Homo sapiens_R-HSA-381033	2018-01-12	0.150535	0.727787	0.162311	0.745883	2.01874	-3.8226	CALR
549	Serotonin Neurotransmitter Release Cycle_Homo sapiens_R-HSA-181429	2018-01-18	0.217108	0.727787	0.228128	0.745883	2.50787	-3.83042	SNAP25
550	Amino acid synthesis and interconversion (transamination)_Homo sapiens_R-HSA-70614	2018-01-25	0.288233	0.727972	0.298457	0.745883	3.08049	-3.83209	GPT
551	PCNA-Dependent Long Patch Base Excision Repair_Homo sapiens_R-HSA-5651801	2018-01-19	0.227686	0.727787	0.238588	0.745883	2.61165	-3.86468	POLD2
552	TNF receptor superfamily (TNFSF) members mediating non-canonical NF-kB pathway_Homo sapiens_R-HSA-5676594	2018-01-17	0.206385	0.727787	0.217527	0.745883	2.47686	-3.90851	LTA
553	HS-GAG degradation_Homo sapiens_R-HSA-2024096	2018-01-21	0.248418	0.727787	0.259087	0.745883	2.80789	-3.91039	SDC2
554	Acetylcholine Neurotransmitter Release Cycle_Homo sapiens_R-HSA-264642	2018-01-17	0.206385	0.727787	0.217527	0.745883	2.47812	-3.91051	SNAP25
555	Amine-derived hormones_Homo sapiens_R-HSA-209776	2018-01-18	0.217108	0.727787	0.228128	0.745883	2.58868	-3.95385	PNMT
556	Telomere C-strand (Lagging Strand) Synthesis_Homo sapiens_R-HSA-174417	2018-01-22	0.258575	0.727787	0.26913	0.745883	2.92532	-3.95671	POLD2
557	Signaling by FGFR2 IIIa TM_Homo sapiens_R-HSA-8851708	2018-01-19	0.227686	0.727787	0.238588	0.745883	2.72338	-4.03003	POLR2I
558	Defective B3GALT6 causes EDSP2 and SEMDJL1_Homo sapiens_R-HSA-4420332	2018-01-19	0.227686	0.727787	0.238588	0.745883	2.74134	-4.0566	SDC2
559	VEGF binds to VEGFR leading to receptor dimerization_Homo sapiens_R-HSA-195399	2018-01-08	0.10305	0.727787	0.115371	0.745883	1.78601	-4.0588	FLT4
560	NOTCH2 intracellular domain regulates transcription_Homo sapiens_R-HSA-2197563	2018-01-12	0.150535	0.727787	0.162311	0.745883	2.14862	-4.06855	HES5
561	Ligand-receptor interactions_Homo sapiens_R-HSA-5632681	2018-01-08	0.10305	0.727787	0.115371	0.745883	1.79477	-4.0787	GAS1
562	Metabolism of porphyrins_Homo sapiens_R-HSA-189445	2018-01-17	0.206385	0.727787	0.217527	0.745883	2.58629	-4.0812	ALAS2
563	Defective B3GAT3 causes JDSSDHD_Homo sapiens_R-HSA-3560801	2018-01-19	0.227686	0.727787	0.238588	0.745883	2.75882	-4.08247	SDC2
564	Cobalamin (Cbl, vitamin B12) transport and metabolism_Homo sapiens_R-HSA-196741	2018-01-21	0.248418	0.727787	0.259087	0.745883	2.94989	-4.10814	CD320
565	Defective B4GALT7 causes EDS, progeroid type_Homo sapiens_R-HSA-3560783	2018-01-19	0.227686	0.727787	0.238588	0.745883	2.7815	-4.11603	SDC2
566	Lagging Strand Synthesis_Homo sapiens_R-HSA-69186	2018-01-20	0.238122	0.727787	0.248907	0.745883	2.8712	-4.12009	POLD2
567	STING mediated induction of host immune responses_Homo sapiens_R-HSA-1834941	2018-01-16	0.195515	0.727787	0.20678	0.745883	2.53478	-4.13705	DTX4
568	Regulated proteolysis of p75NTR_Homo sapiens_R-HSA-193692	2018-01-10	0.127114	0.727787	0.139158	0.745883	2.0082	-4.14226	NGFR
569	Miscellaneous transport and binding events_Homo sapiens_R-HSA-5223345	2018-01-18	0.217108	0.727787	0.228128	0.745883	2.72167	-4.15698	ADD2
570	Formation of Senescence-Associated Heterochromatin Foci (SAHF)_Homo sapiens_R-HSA-2559584	2018-01-17	0.206385	0.727787	0.217527	0.745883	2.64786	-4.17837	HIST1H1A
571	VEGF ligand-receptor interactions_Homo sapiens_R-HSA-194313	2018-01-08	0.10305	0.727787	0.115371	0.745883	1.84031	-4.18219	FLT4
572	MicroRNA (miRNA) biogenesis_Homo sapiens_R-HSA-203927	2018-01-23	0.268595	0.727787	0.279038	0.745883	3.21977	-4.23255	POLR2I
573	Pre-NOTCH Processing in Golgi_Homo sapiens_R-HSA-1912420	2018-01-18	0.217108	0.727787	0.228128	0.745883	2.77667	-4.24099	ATP2A1
574	N-glycan trimming in the ER and Calnexin/Calreticulin cycle_Homo sapiens_R-HSA-532668	2018-01-17	0.206385	0.727787	0.217527	0.745883	2.74498	-4.33162	CALR
575	GABA synthesis, release, reuptake and degradation_Homo sapiens_R-HSA-888590	2018-01-19	0.227686	0.727787	0.238588	0.745883	2.96782	-4.39175	SNAP25
576	Mismatch Repair_Homo sapiens_R-HSA-5358508	2018-01-15	0.184498	0.727787	0.195887	0.745883	2.63177	-4.44801	POLD2
577	WNT5A-dependent internalization of FZD2, FZD5 and ROR2_Homo sapiens_R-HSA-5140745	2018-01-13	0.16201	0.727787	0.173655	0.745883	2.46182	-4.48076	FZD2
578	Defects in vitamin and cofactor metabolism_Homo sapiens_R-HSA-3296482	2018-01-18	0.217108	0.727787	0.228128	0.745883	2.94438	-4.49714	CD320
579	Metallothioneins bind metals_Homo sapiens_R-HSA-5661231	2018-01-11	0.138904	0.727787	0.150813	0.745883	2.28064	-4.50193	MT1X
580	Reduction of cytosolic Ca++ levels_Homo sapiens_R-HSA-418359	2018-01-12	0.150535	0.727787	0.162311	0.745883	2.38658	-4.51912	ATP2A1
581	Processive synthesis on the C-strand of the telomere_Homo sapiens_R-HSA-174414	2018-01-11	0.138904	0.727787	0.150813	0.745883	2.28954	-4.51949	POLD2
582	Scavenging by Class A Receptors_Homo sapiens_R-HSA-3000480	2018-01-19	0.227686	0.727787	0.238588	0.745883	3.05677	-4.52337	CALR
583	Defective EXT1 causes exostoses 1, TRPS2 and CHDS_Homo sapiens_R-HSA-3656253	2018-01-12	0.150535	0.727787	0.162311	0.745883	2.39689	-4.53865	SDC2
584	Mismatch repair (MMR) directed by MSH2:MSH3 (MutSbeta)_Homo sapiens_R-HSA-5358606	2018-01-14	0.17333	0.727787	0.184846	0.745883	2.59233	-4.5432	POLD2
585	Synthesis of PG_Homo sapiens_R-HSA-1483148	2018-01-08	0.10305	0.727787	0.115371	0.745883	2.02219	-4.59553	PLD4
586	Formation of ATP by chemiosmotic coupling_Homo sapiens_R-HSA-163210	2018-01-16	0.195515	0.727787	0.20678	0.745883	2.83446	-4.62617	ATP5G1
587	Defective EXT2 causes exostoses 2_Homo sapiens_R-HSA-3656237	2018-01-12	0.150535	0.727787	0.162311	0.745883	2.46227	-4.66246	SDC2
588	Response to metal ions_Homo sapiens_R-HSA-5660526	2018-01-11	0.138904	0.727787	0.150813	0.745883	2.3671	-4.67259	MT1X
589	Abacavir transport and metabolism_Homo sapiens_R-HSA-2161522	2018-01-10	0.127114	0.727787	0.139158	0.745883	2.26642	-4.67488	ABCG2
590	Calnexin/calreticulin cycle_Homo sapiens_R-HSA-901042	2018-01-15	0.184498	0.727787	0.195887	0.745883	2.77545	-4.69085	CALR
591	Signaling by Hippo_Homo sapiens_R-HSA-2028269	2018-01-20	0.238122	0.727787	0.248907	0.745883	3.27284	-4.69643	TJP1
592	Mismatch repair (MMR) directed by MSH2:MSH6 (MutSalpha)_Homo sapiens_R-HSA-5358565	2018-01-14	0.17333	0.727787	0.184846	0.745883	2.71049	-4.75028	POLD2
593	p75NTR regulates axonogenesis_Homo sapiens_R-HSA-193697	2018-01-09	0.115163	0.727787	0.127345	0.745883	2.20066	-4.75652	NGFR
594	Phase 3 - rapid repolarisation_Homo sapiens_R-HSA-5576890	2018-01-07	0.0907708	0.727787	0.103233	0.745883	1.98283	-4.75764	KCNH2
595	Activation of DNA fragmentation factor_Homo sapiens_R-HSA-211227	2018-01-13	0.16201	0.727787	0.173655	0.745883	2.62643	-4.78035	HIST1H1A
596	Purine ribonucleoside monophosphate biosynthesis_Homo sapiens_R-HSA-73817	2018-01-12	0.150535	0.727787	0.162311	0.745883	2.53674	-4.80348	PFAS
597	Organic anion transporters_Homo sapiens_R-HSA-428643	2018-01-08	0.10305	0.727787	0.115371	0.745883	2.11557	-4.80774	SLC25A10
598	Apoptosis induced DNA fragmentation_Homo sapiens_R-HSA-140342	2018-01-13	0.16201	0.727787	0.173655	0.745883	2.65685	-4.83574	HIST1H1A
599	Heme biosynthesis_Homo sapiens_R-HSA-189451	2018-01-11	0.138904	0.727787	0.150813	0.745883	2.46304	-4.86197	ALAS2
600	Facilitative Na+-independent glucose transporters_Homo sapiens_R-HSA-428790	2018-01-13	0.16201	0.727787	0.173655	0.745883	2.71387	-4.93951	SLC2A4
601	Processive synthesis on the lagging strand_Homo sapiens_R-HSA-69183	2018-01-15	0.184498	0.727787	0.195887	0.745883	2.93855	-4.96649	POLD2
602	Leading Strand Synthesis_Homo sapiens_R-HSA-69109	2018-01-14	0.17333	0.727787	0.184846	0.745883	2.84137	-4.97966	POLD2
603	Degradation of cysteine and homocysteine_Homo sapiens_R-HSA-1614558	2018-01-09	0.115163	0.727787	0.127345	0.745883	2.32162	-5.01796	SLC25A10
604	Alpha-defensins_Homo sapiens_R-HSA-1462054	2018-01-09	0.115163	0.727787	0.127345	0.745883	2.32618	-5.02782	PRSS2
605	Polymerase switching on the C-strand of the telomere_Homo sapiens_R-HSA-174411	2018-01-14	0.17333	0.727787	0.184846	0.745883	2.87167	-5.03276	POLD2
606	Scavenging by Class F Receptors_Homo sapiens_R-HSA-3000484	2018-01-06	0.0783244	0.727787	0.0909312	0.745883	2.03123	-5.17333	CALR
607	Polymerase switching_Homo sapiens_R-HSA-69091	2018-01-14	0.17333	0.727787	0.184846	0.745883	2.97334	-5.21095	POLD2
608	Defects in cobalamin (B12) metabolism_Homo sapiens_R-HSA-3296469	2018-01-11	0.138904	0.727787	0.150813	0.745883	2.6769	-5.28414	CD320
609	ChREBP activates metabolic gene expression_Homo sapiens_R-HSA-163765	2018-01-08	0.10305	0.727787	0.115371	0.745883	2.37785	-5.40376	PKLR
610	p75NTR negatively regulates cell cycle via SC1_Homo sapiens_R-HSA-193670	2018-01-06	0.0783244	0.727787	0.0909312	0.745883	2.12852	-5.42111	NGFR
611	Role of Abl in Robo-Slit signaling_Homo sapiens_R-HSA-428890	2018-01-09	0.115163	0.727787	0.127345	0.745883	2.51137	-5.42809	CAP2
612	IRF3 mediated activation of type 1 IFN_Homo sapiens_R-HSA-1606341	2018-01-06	0.0783244	0.727787	0.0909312	0.745883	2.13842	-5.44634	DTX4
613	IRF3-mediated induction of type I IFN_Homo sapiens_R-HSA-3270619	2018-01-13	0.16201	0.727787	0.173655	0.745883	3.00233	-5.46454	DTX4
614	Apoptotic cleavage of cell adhesion proteins_Homo sapiens_R-HSA-351906	2018-01-11	0.138904	0.727787	0.150813	0.745883	2.78711	-5.50167	TJP1
615	ATF6-alpha activates chaperone genes_Homo sapiens_R-HSA-381183	2018-01-10	0.127114	0.727787	0.139158	0.745883	2.77767	-5.72941	CALR
616	Diseases associated with visual transduction_Homo sapiens_R-HSA-2474795	2018-01-09	0.115163	0.727787	0.127345	0.745883	2.66778	-5.76615	STRA6
617	Removal of the Flap Intermediate from the C-strand_Homo sapiens_R-HSA-174437	2018-01-10	0.127114	0.727787	0.139158	0.745883	2.92607	-6.03551	POLD2
618	Removal of the Flap Intermediate_Homo sapiens_R-HSA-69166	2018-01-14	0.17333	0.727787	0.184846	0.745883	3.46658	-6.07539	POLD2
619	Retinoid cycle disease events_Homo sapiens_R-HSA-2453864	2018-01-09	0.115163	0.727787	0.127345	0.745883	2.85305	-6.1666	STRA6
620	Urea cycle_Homo sapiens_R-HSA-70635	2018-01-10	0.127114	0.727787	0.139158	0.745883	3.02252	-6.23446	CPS1
621	Unwinding of DNA_Homo sapiens_R-HSA-176974	2018-01-12	0.150535	0.727787	0.162311	0.745883	3.47292	-6.57618	GINS2
622	Synthesis of IP2, IP, and Ins in the cytosol_Homo sapiens_R-HSA-1855183	2018-01-11	0.138904	0.727787	0.150813	0.745883	3.4908	-6.89075	INPP5J
623	Pregnenolone biosynthesis_Homo sapiens_R-HSA-196108	2018-01-09	0.115163	0.727787	0.127345	0.745883	3.25003	-7.02463	STARD6
624	Ubiquinol biosynthesis_Homo sapiens_R-HSA-2142789	2018-01-07	0.0907708	0.727787	0.103233	0.745883	2.97052	-7.12751	COQ3
625	Abacavir transmembrane transport_Homo sapiens_R-HSA-2161517	2018-01-05	0.0657083	0.727787	0.0784615	0.745883	2.68947	-7.32217	ABCG2
626	Digestion of dietary carbohydrate_Homo sapiens_R-HSA-189085	2018-01-08	0.10305	0.727787	0.115371	0.745883	3.29361	-7.48488	LCT
627	Synthesis of diphthamide-EEF2_Homo sapiens_R-HSA-5358493	2018-01-08	0.10305	0.727787	0.115371	0.745883	3.85316	-8.75647	DPH2
628	Neurotoxicity of clostridium toxins_Homo sapiens_R-HSA-168799	2018-01-10	0.127114	0.727787	0.139158	0.745883	4.3106	-8.89134	SNAP25

## Sheet: Uninf_3d
	Term	Overlap	P.value	Adjusted.P.value	Old.P.value	Old.Adjusted.P.value	Z.score	Combined.Score	Genes
1	Downstream signaling of activated FGFR2_Homo sapiens_R-HSA-5654696	32/329	0.000856418	0.112016	0.000386138	0.0565428	-2.6048	18.3971	GSK3B;CAMK2D;PHLPP1;PDE1C;PDE1A;RASGRF2;RASAL2;PIK3CB;FOXO3;FGF2;FOXO1;RAP1A;PRKAR2B;PPP2R5E;PIP4K2A;PIP5K1B;NCAM1;ANGPT1;KSR1;EGF;PRKCE;GAB1;BRAF;NRG1;NRG2;GRIN2C;SPTB;PTK2;PSMA1;RASA1;TEK;SOS1
2	Downstream signaling of activated FGFR3_Homo sapiens_R-HSA-5654708	32/329	0.000856418	0.112016	0.000386138	0.0565428	-2.59754	18.3458	GSK3B;CAMK2D;PHLPP1;PDE1C;PDE1A;RASGRF2;RASAL2;PIK3CB;FOXO3;FGF2;FOXO1;RAP1A;PRKAR2B;PPP2R5E;PIP4K2A;PIP5K1B;NCAM1;ANGPT1;KSR1;EGF;PRKCE;GAB1;BRAF;NRG1;NRG2;GRIN2C;SPTB;PTK2;PSMA1;RASA1;TEK;SOS1
3	Downstream signaling of activated FGFR4_Homo sapiens_R-HSA-5654716	32/329	0.000856418	0.112016	0.000386138	0.0565428	-2.58704	18.2716	GSK3B;CAMK2D;PHLPP1;PDE1C;PDE1A;RASGRF2;RASAL2;PIK3CB;FOXO3;FGF2;FOXO1;RAP1A;PRKAR2B;PPP2R5E;PIP4K2A;PIP5K1B;NCAM1;ANGPT1;KSR1;EGF;PRKCE;GAB1;BRAF;NRG1;NRG2;GRIN2C;SPTB;PTK2;PSMA1;RASA1;TEK;SOS1
4	Signaling by FGFR4_Homo sapiens_R-HSA-5654743	32/332	0.000996418	0.112016	0.000446641	0.0565428	-2.58924	17.8951	GSK3B;CAMK2D;PHLPP1;PDE1C;PDE1A;RASGRF2;RASAL2;PIK3CB;FOXO3;FGF2;FOXO1;RAP1A;PRKAR2B;PPP2R5E;PIP4K2A;PIP5K1B;NCAM1;ANGPT1;KSR1;EGF;PRKCE;GAB1;BRAF;NRG1;NRG2;GRIN2C;SPTB;PTK2;PSMA1;RASA1;TEK;SOS1
5	Downstream signaling of activated FGFR1_Homo sapiens_R-HSA-5654687	32/332	0.000996418	0.112016	0.000446641	0.0565428	-2.58909	17.8941	GSK3B;CAMK2D;PHLPP1;PDE1C;PDE1A;RASGRF2;RASAL2;PIK3CB;FOXO3;FGF2;FOXO1;RAP1A;PRKAR2B;PPP2R5E;PIP4K2A;PIP5K1B;NCAM1;ANGPT1;KSR1;EGF;PRKCE;GAB1;BRAF;NRG1;NRG2;GRIN2C;SPTB;PTK2;PSMA1;RASA1;TEK;SOS1
6	Signaling by FGFR3_Homo sapiens_R-HSA-5654741	32/333	0.00104733	0.112016	0.000468599	0.0565428	-2.57919	17.6971	GSK3B;CAMK2D;PHLPP1;PDE1C;PDE1A;RASGRF2;RASAL2;PIK3CB;FOXO3;FGF2;FOXO1;RAP1A;PRKAR2B;PPP2R5E;PIP4K2A;PIP5K1B;NCAM1;ANGPT1;KSR1;EGF;PRKCE;GAB1;BRAF;NRG1;NRG2;GRIN2C;SPTB;PTK2;PSMA1;RASA1;TEK;SOS1
7	NGF signalling via TRKA from the plasma membrane_Homo sapiens_R-HSA-187037	35/374	0.00100232	0.112016	0.000403381	0.0565428	-2.5403	17.5419	GSK3B;CAMK2D;PHLPP1;PDE1C;PDE1A;RASGRF2;RASAL2;PIK3CB;FOXO3;FGF2;FOXO1;RAP1A;RPS6KA5;PRKAR2B;PPP2R5E;PIP4K2A;PIP5K1B;NCAM1;MAP2K5;ANGPT1;KSR1;EGF;PRKCE;GAB1;BRAF;NRG1;NRG2;GRIN2C;SPTB;PTK2;DNM3;PSMA1;RASA1;TEK;SOS1
8	Signaling by PDGF_Homo sapiens_R-HSA-186797	34/364	0.00121272	0.112016	0.000502941	0.0565428	-2.55135	17.132	GSK3B;CAMK2D;PHLPP1;PDE1C;PDE1A;RASGRF2;RASAL2;PIK3CB;FOXO3;FGF2;FOXO1;RAP1A;PRKAR2B;PPP2R5E;PDGFC;PIP4K2A;PIP5K1B;NCAM1;ANGPT1;KSR1;EGF;PRKCE;GAB1;BRAF;NRG1;NRG2;GRIN2C;SPTB;PTK2;PSMA1;RASA1;COL6A6;TEK;SOS1
9	Signaling by FGFR1_Homo sapiens_R-HSA-5654736	32/336	0.00121397	0.112016	0.000540319	0.0565428	-2.54665	17.0979	GSK3B;CAMK2D;PHLPP1;PDE1C;PDE1A;RASGRF2;RASAL2;PIK3CB;FOXO3;FGF2;FOXO1;RAP1A;PRKAR2B;PPP2R5E;PIP4K2A;PIP5K1B;NCAM1;ANGPT1;KSR1;EGF;PRKCE;GAB1;BRAF;NRG1;NRG2;GRIN2C;SPTB;PTK2;PSMA1;RASA1;TEK;SOS1
10	Downstream signal transduction_Homo sapiens_R-HSA-186763	32/341	0.0015432	0.113415	0.000681565	0.0565428	-2.50557	16.2208	GSK3B;CAMK2D;PHLPP1;PDE1C;PDE1A;RASGRF2;RASAL2;PIK3CB;FOXO3;FGF2;FOXO1;RAP1A;PRKAR2B;PPP2R5E;PIP4K2A;PIP5K1B;NCAM1;ANGPT1;KSR1;EGF;PRKCE;GAB1;BRAF;NRG1;NRG2;GRIN2C;SPTB;PTK2;PSMA1;RASA1;TEK;SOS1
11	DAP12 signaling_Homo sapiens_R-HSA-2424491	32/344	0.00177581	0.113415	0.000781114	0.0565428	-2.52096	15.9665	GSK3B;CAMK2D;PHLPP1;PDE1C;PDE1A;RASGRF2;RASAL2;PIK3CB;FOXO3;FGF2;FOXO1;RAP1A;PRKAR2B;PPP2R5E;PIP4K2A;PIP5K1B;NCAM1;ANGPT1;KSR1;EGF;PRKCE;GAB1;BRAF;NRG1;NRG2;GRIN2C;SPTB;PTK2;PSMA1;RASA1;TEK;SOS1
12	Signaling by EGFR_Homo sapiens_R-HSA-177929	32/355	0.00290666	0.139229	0.00126392	0.0713877	-2.45472	14.3374	GSK3B;CAMK2D;PHLPP1;PDE1C;PDE1A;RASGRF2;RASAL2;PIK3CB;FOXO3;FGF2;FOXO1;RAP1A;PRKAR2B;PPP2R5E;PIP4K2A;PIP5K1B;NCAM1;ANGPT1;KSR1;EGF;PRKCE;GAB1;BRAF;NRG1;NRG2;GRIN2C;SPTB;PTK2;PSMA1;RASA1;TEK;SOS1
13	Signalling by NGF_Homo sapiens_R-HSA-166520	39/450	0.00221091	0.11767	0.000770057	0.0565428	-2.34099	14.3136	GSK3B;CAMK2D;PHLPP1;PDE1C;RASGRF2;PDE1A;RASAL2;PIK3CB;FOXO3;PCSK6;FGF2;KALRN;PCSK5;FOXO1;RAP1A;RPS6KA5;PRKAR2B;PPP2R5E;PIP4K2A;PIP5K1B;NCAM1;MAP2K5;ANGPT1;KSR1;EGF;PRKCE;GAB1;BRAF;NRG1;NRG2;GRIN2C;SPTB;PTK2;DNM3;TIAM2;PSMA1;RASA1;TEK;SOS1
14	Signaling by SCF-KIT_Homo sapiens_R-HSA-1433557	30/325	0.00272376	0.137335	0.00126708	0.0713877	-2.40752	14.2182	GSK3B;CAMK2D;PHLPP1;RASGRF2;RASAL2;PIK3CB;FOXO3;FGF2;FOXO1;RAP1A;PPP2R5E;PIP4K2A;PIP5K1B;NCAM1;ANGPT1;KSR1;EGF;GAB1;BRAF;NRG1;GAB2;NRG2;GRIN2C;SPTB;PTK2;TEC;PSMA1;RASA1;TEK;SOS1
15	Signaling by FGFR2_Homo sapiens_R-HSA-5654738	32/361	0.00375004	0.149689	0.0016239	0.0713877	-2.45521	13.7148	GSK3B;CAMK2D;PHLPP1;PDE1C;PDE1A;RASGRF2;RASAL2;PIK3CB;FOXO3;FGF2;FOXO1;RAP1A;PRKAR2B;PPP2R5E;PIP4K2A;PIP5K1B;NCAM1;ANGPT1;KSR1;EGF;PRKCE;GAB1;BRAF;NRG1;NRG2;GRIN2C;SPTB;PTK2;PSMA1;RASA1;TEK;SOS1
16	DAP12 interactions_Homo sapiens_R-HSA-2172127	32/359	0.0034484	0.149689	0.00149511	0.0713877	-2.38825	13.541	GSK3B;CAMK2D;PHLPP1;PDE1C;PDE1A;RASGRF2;RASAL2;PIK3CB;FOXO3;FGF2;FOXO1;RAP1A;PRKAR2B;PPP2R5E;PIP4K2A;PIP5K1B;NCAM1;ANGPT1;KSR1;EGF;PRKCE;GAB1;BRAF;NRG1;NRG2;GRIN2C;SPTB;PTK2;PSMA1;RASA1;TEK;SOS1
17	Neuronal System_Homo sapiens_R-HSA-112316	29/301	0.00168848	0.113415	0.000826304	0.0565428	-2.12034	13.5361	KCNG2;GABRB1;CAMK2D;KCNC1;KCNK9;STXBP1;RASGRF2;GRIK4;ABAT;GRIK1;NCALD;GRIP1;RPS6KA6;MYO6;KCNH1;GABBR1;KCNJ10;KCNK10;GAD1;CACNA2D3;SLC6A13;BRAF;GRIN2C;CACNB4;KCNQ3;KCNQ4;KCNQ5;APBA1;PLCB1
18	HS-GAG biosynthesis_Homo sapiens_R-HSA-2022928	2018-07-31	0.00105451	0.112016	0.00170549	0.0713877	-1.97391	13.5305	HS3ST3B1;EXT1;NDST3;HS3ST5;GPC5;GPC6;HS2ST1
19	Signaling by FGFR_Homo sapiens_R-HSA-190236	32/366	0.00460363	0.1628	0.00198878	0.0762101	-2.419	13.0164	GSK3B;CAMK2D;PHLPP1;PDE1C;PDE1A;RASGRF2;RASAL2;PIK3CB;FOXO3;FGF2;FOXO1;RAP1A;PRKAR2B;PPP2R5E;PIP4K2A;PIP5K1B;NCAM1;ANGPT1;KSR1;EGF;PRKCE;GAB1;BRAF;NRG1;NRG2;GRIN2C;SPTB;PTK2;PSMA1;RASA1;TEK;SOS1
20	Developmental Biology_Homo sapiens_R-HSA-1266738	60/786	0.00370432	0.149689	0.000708876	0.0565428	-2.18999	12.2601	GSK3B;RASGRF2;ARHGAP39;PCSK6;FGF2;RPS6KA6;RPS6KA5;SCN11A;PPP2R5E;HNF4A;HOXA3;KDM6A;NCOA1;NCOA2;TRPC5;TRPC6;SEMA6A;KSR1;EBF1;NRG1;PAX6;NRG2;MED27;SPTB;ENAH;DNM3;CACNB4;PSMA1;RASA1;KCNQ3;COL6A6;SOS1;MYL9;CAMK2D;KMT2C;RASAL2;FOXO3;KALRN;FOXO1;RAP1A;NCAM1;SRGAP3;TBL1X;SCN3B;SRGAP1;PLXNA4;CDK19;ANGPT1;EGF;PCGF2;SIAH1;BRAF;GRIN2C;PBX1;PTK2;NFASC;MEIS1;NR6A1;CNTN2;TEK
21	Signaling by ERBB4_Homo sapiens_R-HSA-1236394	29/330	0.00630862	0.197727	0.00297728	0.105638	-2.31108	11.7076	GSK3B;CAMK2D;PHLPP1;RASGRF2;RASAL2;PIK3CB;FOXO3;FGF2;FOXO1;RAP1A;PPP2R5E;PIP4K2A;PIP5K1B;NCAM1;WWOX;ANGPT1;KSR1;EGF;GAB1;BRAF;NRG1;NRG2;GRIN2C;SPTB;PTK2;PSMA1;RASA1;TEK;SOS1
22	Axon guidance_Homo sapiens_R-HSA-422475	42/515	0.00461066	0.1628	0.00148064	0.0713877	-2.1367	11.4941	GSK3B;CAMK2D;RASGRF2;ARHGAP39;RASAL2;FGF2;KALRN;RPS6KA6;RAP1A;RPS6KA5;SCN11A;PPP2R5E;NCAM1;SRGAP3;SCN3B;SRGAP1;PLXNA4;TRPC5;TRPC6;SEMA6A;ANGPT1;KSR1;EGF;SIAH1;BRAF;NRG1;NRG2;GRIN2C;SPTB;PTK2;ENAH;DNM3;NFASC;CACNB4;PSMA1;RASA1;KCNQ3;CNTN2;COL6A6;TEK;SOS1;MYL9
23	Glycosaminoglycan metabolism_Homo sapiens_R-HSA-1630316	15/121	0.00206198	0.11767	0.001749	0.0713877	-1.82702	11.2984	CSGALNACT1;HS3ST3B1;CEMIP;HPSE2;STAB2;HS3ST5;HS2ST1;EXT1;CHST11;UST;NDST3;GPC5;CHSY3;B4GALT6;GPC6
24	Nuclear Receptor transcription pathway_Homo sapiens_R-HSA-383280	1951-09-01	0.00140312	0.112016	0.00178842	0.0713877	-1.70739	11.216	AR;NR6A1;THRB;HNF4A;ESRRB;ESRRG;RORA;RORB;NR3C2
25	Transmission across Chemical Synapses_Homo sapiens_R-HSA-112315	21/211	0.00475825	0.1628	0.00295152	0.105638	-1.98068	10.5924	GABBR1;GABRB1;CAMK2D;KCNJ10;STXBP1;GAD1;RASGRF2;CACNA2D3;SLC6A13;GRIK4;ABAT;BRAF;GRIK1;GRIN2C;NCALD;GRIP1;RPS6KA6;CACNB4;MYO6;APBA1;PLCB1
26	NCAM signaling for neurite out-growth_Homo sapiens_R-HSA-375165	24/266	0.00898258	0.215133	0.00491073	0.14256	-2.17331	10.2416	CAMK2D;ANGPT1;KSR1;EGF;RASGRF2;BRAF;NRG1;RASAL2;NRG2;GRIN2C;FGF2;SPTB;PTK2;RAP1A;CACNB4;RPS6KA5;PSMA1;PPP2R5E;RASA1;CNTN2;COL6A6;NCAM1;TEK;SOS1
27	Gastrin-CREB signalling pathway via PKC and MAPK_Homo sapiens_R-HSA-881907	35/432	0.0100539	0.220123	0.0039965	0.125618	-2.19601	10.1012	DGKG;CHRM3;CAMK2D;RASGRF2;RASAL2;HTR2A;FGF2;KALRN;GNA14;RAP1A;GRK5;PPP2R5E;GNRHR;NCAM1;TRPC6;ANGPT1;KSR1;EGF;PRKCE;BRAF;NRG1;TACR1;NRG2;GRIN2C;SPTB;PTK2;PLCB4;PSMA1;GNAQ;RASA1;AGTR1;GNRH2;TEK;PLCB1;SOS1
28	Hemostasis_Homo sapiens_R-HSA-109582	44/552	0.00569889	0.18826	0.0017412	0.0713877	-1.92352	9.93977	DGKG;DOCK9;PROS1;PDE1A;MPL;PIK3CB;PHF21A;GNA14;RAP1A;PRKAR2B;PPP2R5E;GNA12;PHACTR2;KIF21A;PRKG1;TGFB2;TRPC6;CXADR;ANGPT1;EGF;HBG1;PRKCE;CABLES1;VEGFC;GP1BA;GAB2;GP6;GP5;KIF6;PTK2;SLC8A3;RAD51B;STIM1;P2RX3;KIF26B;GNAQ;PDE3A;MRVI1;PDE5A;TEK;SOS1;ZFPM2;ZFPM1;RAPGEF4
29	Platelet Aggregation (Plug Formation)_Homo sapiens_R-HSA-76009	1937-07-01	0.00312041	0.14235	0.00406488	0.125618	-1.71549	9.89801	RAP1A;MPL;GP1BA;SOS1;GP5;PTK2;RAPGEF4
30	MAPK family signaling cascades_Homo sapiens_R-HSA-5683057	25/284	0.0104536	0.221515	0.00552336	0.155629	-2.16544	9.87614	CAMK2D;RASGRF2;RASAL2;FOXO3;KALRN;FGF2;FOXO1;CDC14A;CDC14B;RAP1A;PPP2R5E;NCAM1;ANGPT1;KSR1;EGF;BRAF;NRG1;NRG2;GRIN2C;SPTB;PTK2;PSMA1;RASA1;TEK;SOS1
31	Acetylcholine regulates insulin secretion_Homo sapiens_R-HSA-399997	2018-04-10	0.00132838	0.112016	0.00329306	0.11267	-1.47942	9.79938	GNA14;CHRM3;GNAQ;PLCB1
32	cGMP effects_Homo sapiens_R-HSA-418457	2018-05-18	0.00209	0.11767	0.00371554	0.122741	-1.58343	9.77069	PDE1A;PDE3A;MRVI1;PDE5A;PRKG1
33	Interleukin receptor SHC signaling_Homo sapiens_R-HSA-912526	22/245	0.0126326	0.221515	0.00727873	0.18846	-2.12188	9.27572	CAMK2D;ANGPT1;KSR1;EGF;RASGRF2;BRAF;NRG1;GAB2;RASAL2;NRG2;PIK3CB;GRIN2C;FGF2;SPTB;PTK2;RAP1A;PSMA1;PPP2R5E;RASA1;NCAM1;TEK;SOS1
34	PI Metabolism_Homo sapiens_R-HSA-1483255	1960-09-01	0.00443667	0.1628	0.00472836	0.141555	-1.70744	9.25066	PI4K2B;INPP4B;PITPNB;GDPD1;PIP4K2A;TPTE;PIP5K1B;PIK3CB;MTMR7
35	Fc epsilon receptor (FCERI) signaling_Homo sapiens_R-HSA-2454202	32/395	0.0134198	0.221515	0.00581456	0.157542	-2.13399	9.1997	GSK3B;CAMK2D;PHLPP1;RASGRF2;TXK;RASAL2;PIK3CB;FOXO3;FGF2;FOXO1;RAP1A;PPP2R5E;PIP4K2A;PIP5K1B;NCAM1;ANGPT1;KSR1;EGF;GAB1;NFATC2;BRAF;NRG1;NRG2;GAB2;GRIN2C;SPTB;PTK2;TEC;PSMA1;RASA1;TEK;SOS1
36	Interleukin-3, 5 and GM-CSF signaling_Homo sapiens_R-HSA-512988	23/261	0.0134859	0.221515	0.00752674	0.189753	-2.09413	9.01754	CAMK2D;ANGPT1;KSR1;EGF;RASGRF2;BRAF;NRG1;GAB2;RASAL2;NRG2;PIK3CB;GRIN2C;FGF2;SPTB;PTK2;TEC;RAP1A;PSMA1;PPP2R5E;RASA1;NCAM1;TEK;SOS1
37	Muscle contraction_Homo sapiens_R-HSA-397014	19/196	0.00921055	0.215212	0.00592017	0.157542	-1.77827	8.33545	CAMK2D;KCNIP1;CAV3;KCNK9;KCNK10;CACNA2D3;SORBS1;RYR3;MYLK;HIPK2;SLC8A3;ACTA2;CACNB4;STIM1;SCN11A;CALD1;FGF13;SCN3B;MYL9
38	Interleukin-2 signaling_Homo sapiens_R-HSA-451927	22/252	0.0170108	0.250713	0.00973202	0.205915	-1.93718	7.89191	CAMK2D;ANGPT1;KSR1;EGF;RASGRF2;BRAF;NRG1;GAB2;RASAL2;NRG2;PIK3CB;GRIN2C;FGF2;SPTB;PTK2;RAP1A;PSMA1;PPP2R5E;RASA1;NCAM1;TEK;SOS1
39	Heparan sulfate/heparin (HS-GAG) metabolism_Homo sapiens_R-HSA-1638091	1954-08-01	0.00769592	0.204797	0.0080745	0.198343	-1.61375	7.85421	HS3ST3B1;EXT1;HPSE2;NDST3;HS3ST5;GPC5;GPC6;HS2ST1
40	Signaling by WNT in cancer_Homo sapiens_R-HSA-4791275	1934-06-01	0.0086546	0.215133	0.0102268	0.205915	-1.62553	7.72071	RNF43;TCF7L2;GSK3B;CTBP2;PPP2R5E;LRP6
41	PI-3K cascade:FGFR1_Homo sapiens_R-HSA-5654689	13/122	0.0138086	0.221515	0.0107471	0.205915	-1.73569	7.43302	GSK3B;PHLPP1;EGF;GAB1;NRG1;NRG2;PIK3CB;FOXO3;FGF2;FOXO1;PPP2R5E;PIP4K2A;PIP5K1B
42	PI-3K cascade:FGFR2_Homo sapiens_R-HSA-5654695	13/122	0.0138086	0.221515	0.0107471	0.205915	-1.72758	7.39828	GSK3B;PHLPP1;EGF;GAB1;NRG1;NRG2;PIK3CB;FOXO3;FGF2;FOXO1;PPP2R5E;PIP4K2A;PIP5K1B
43	PI-3K cascade:FGFR3_Homo sapiens_R-HSA-5654710	13/122	0.0138086	0.221515	0.0107471	0.205915	-1.71844	7.35915	GSK3B;PHLPP1;EGF;GAB1;NRG1;NRG2;PIK3CB;FOXO3;FGF2;FOXO1;PPP2R5E;PIP4K2A;PIP5K1B
44	PI-3K cascade:FGFR4_Homo sapiens_R-HSA-5654720	13/122	0.0138086	0.221515	0.0107471	0.205915	-1.7108	7.32643	GSK3B;PHLPP1;EGF;GAB1;NRG1;NRG2;PIK3CB;FOXO3;FGF2;FOXO1;PPP2R5E;PIP4K2A;PIP5K1B
45	PI3K events in ERBB4 signaling_Homo sapiens_R-HSA-1250342	13/122	0.0138086	0.221515	0.0107471	0.205915	-1.69941	7.27765	GSK3B;PHLPP1;EGF;GAB1;NRG1;NRG2;PIK3CB;FOXO3;FGF2;FOXO1;PPP2R5E;PIP4K2A;PIP5K1B
46	Signaling by Leptin_Homo sapiens_R-HSA-2586552	21/243	0.0214371	0.28925	0.0125692	0.211223	-1.89293	7.27385	CAMK2D;ANGPT1;KSR1;EGF;RASGRF2;BRAF;NRG1;RASAL2;NRG2;GRIN2C;FGF2;SPTB;PTK2;RAP1A;PSMA1;PPP2R5E;RASA1;LEPR;NCAM1;TEK;SOS1
47	PIP3 activates AKT signaling_Homo sapiens_R-HSA-1257604	13/122	0.0138086	0.221515	0.0107471	0.205915	-1.69361	7.25284	GSK3B;PHLPP1;EGF;GAB1;NRG1;NRG2;PIK3CB;FOXO3;FGF2;FOXO1;PPP2R5E;PIP4K2A;PIP5K1B
48	GAB1 signalosome_Homo sapiens_R-HSA-180292	13/125	0.0166432	0.249639	0.0127771	0.211223	-1.71084	7.00716	GSK3B;PHLPP1;EGF;GAB1;NRG1;NRG2;PIK3CB;FOXO3;FGF2;FOXO1;PPP2R5E;PIP4K2A;PIP5K1B
49	Smooth Muscle Contraction_Homo sapiens_R-HSA-445355	1933-06-01	0.00745822	0.204142	0.00904137	0.205915	-1.41993	6.95542	ACTA2;CAV3;CALD1;SORBS1;MYL9;MYLK
50	PI3K/AKT activation_Homo sapiens_R-HSA-198203	13/125	0.0166432	0.249639	0.0127771	0.211223	-1.69715	6.95112	GSK3B;PHLPP1;EGF;GAB1;NRG1;NRG2;PIK3CB;FOXO3;FGF2;FOXO1;PPP2R5E;PIP4K2A;PIP5K1B
51	ERBB2 Regulates Cell Motility_Homo sapiens_R-HSA-6785631	2018-04-15	0.0069642	0.197727	0.0105869	0.205915	-1.28199	6.36763	DIAPH1;EGF;NRG1;NRG2
52	Defective B3GALTL causes Peters-plus syndrome (PpS)_Homo sapiens_R-HSA-5083635	1937-06-01	0.0130606	0.221515	0.0144397	0.222122	-1.43127	6.20905	SBSPON;SPON2;SPON1;ADAMTS3;ADAMTS17;ADAMTS6
53	GRB2 events in EGFR signaling_Homo sapiens_R-HSA-179812	20/235	0.0280722	0.292677	0.0168554	0.222122	-1.71813	6.13885	CAMK2D;ANGPT1;KSR1;EGF;RASGRF2;BRAF;NRG1;RASAL2;NRG2;GRIN2C;FGF2;SPTB;PTK2;RAP1A;PSMA1;PPP2R5E;RASA1;NCAM1;TEK;SOS1
54	RAF/MAP kinase cascade_Homo sapiens_R-HSA-5673001	20/235	0.0280722	0.292677	0.0168554	0.222122	-1.70708	6.09935	CAMK2D;ANGPT1;KSR1;EGF;RASGRF2;BRAF;NRG1;RASAL2;NRG2;GRIN2C;FGF2;SPTB;PTK2;RAP1A;PSMA1;PPP2R5E;RASA1;NCAM1;TEK;SOS1
55	SHC1 events in EGFR signaling_Homo sapiens_R-HSA-180336	20/235	0.0280722	0.292677	0.0168554	0.222122	-1.70054	6.07599	CAMK2D;ANGPT1;KSR1;EGF;RASGRF2;BRAF;NRG1;RASAL2;NRG2;GRIN2C;FGF2;SPTB;PTK2;RAP1A;PSMA1;PPP2R5E;RASA1;NCAM1;TEK;SOS1
56	Platelet homeostasis_Homo sapiens_R-HSA-418346	1987-10-01	0.0178324	0.251227	0.0153428	0.222122	-1.4983	6.03328	SLC8A3;TRPC6;STIM1;P2RX3;PPP2R5E;PDE1A;PDE3A;MRVI1;PDE5A;PRKG1
57	SHC1 events in ERBB4 signaling_Homo sapiens_R-HSA-1250347	20/235	0.0280722	0.292677	0.0168554	0.222122	-1.68831	6.0323	CAMK2D;ANGPT1;KSR1;EGF;RASGRF2;BRAF;NRG1;RASAL2;NRG2;GRIN2C;FGF2;SPTB;PTK2;RAP1A;PSMA1;PPP2R5E;RASA1;NCAM1;TEK;SOS1
58	FRS-mediated FGFR1 signaling_Homo sapiens_R-HSA-5654693	20/236	0.0291897	0.292677	0.0175165	0.222122	-1.70105	6.01142	CAMK2D;ANGPT1;KSR1;EGF;RASGRF2;BRAF;NRG1;RASAL2;NRG2;GRIN2C;FGF2;SPTB;PTK2;RAP1A;PSMA1;PPP2R5E;RASA1;NCAM1;TEK;SOS1
59	SOS-mediated signalling_Homo sapiens_R-HSA-112412	20/235	0.0280722	0.292677	0.0168554	0.222122	-1.67952	6.00088	CAMK2D;ANGPT1;KSR1;EGF;RASGRF2;BRAF;NRG1;RASAL2;NRG2;GRIN2C;FGF2;SPTB;PTK2;RAP1A;PSMA1;PPP2R5E;RASA1;NCAM1;TEK;SOS1
60	FRS-mediated FGFR2 signaling_Homo sapiens_R-HSA-5654700	20/236	0.0291897	0.292677	0.0175165	0.222122	-1.69503	5.99014	CAMK2D;ANGPT1;KSR1;EGF;RASGRF2;BRAF;NRG1;RASAL2;NRG2;GRIN2C;FGF2;SPTB;PTK2;RAP1A;PSMA1;PPP2R5E;RASA1;NCAM1;TEK;SOS1
61	Neurotransmitter Receptor Binding And Downstream Transmission In The Postsynaptic Cell_Homo sapiens_R-HSA-112314	14/142	0.0203295	0.278223	0.0148623	0.222122	-1.53665	5.9863	GABBR1;GABRB1;CAMK2D;KCNJ10;RASGRF2;GRIK4;BRAF;GRIK1;GRIN2C;NCALD;GRIP1;RPS6KA6;MYO6;PLCB1
62	FRS-mediated FGFR3 signaling_Homo sapiens_R-HSA-5654706	20/236	0.0291897	0.292677	0.0175165	0.222122	-1.68555	5.95662	CAMK2D;ANGPT1;KSR1;EGF;RASGRF2;BRAF;NRG1;RASAL2;NRG2;GRIN2C;FGF2;SPTB;PTK2;RAP1A;PSMA1;PPP2R5E;RASA1;NCAM1;TEK;SOS1
63	Synthesis of bile acids and bile salts via 27-hydroxycholesterol_Homo sapiens_R-HSA-193807	2018-04-15	0.0069642	0.197727	0.0105869	0.205915	-1.19445	5.9328	NCOA1;NCOA2;AKR1C3;CYP7B1
64	FRS-mediated FGFR4 signaling_Homo sapiens_R-HSA-5654712	20/236	0.0291897	0.292677	0.0175165	0.222122	-1.6747	5.9183	CAMK2D;ANGPT1;KSR1;EGF;RASGRF2;BRAF;NRG1;RASAL2;NRG2;GRIN2C;FGF2;SPTB;PTK2;RAP1A;PSMA1;PPP2R5E;RASA1;NCAM1;TEK;SOS1
65	Role of LAT2/NTAL/LAB on calcium mobilization_Homo sapiens_R-HSA-2730905	15/162	0.0277079	0.292677	0.0192908	0.222122	-1.61547	5.79314	GSK3B;PHLPP1;EGF;GAB1;NRG1;GAB2;NRG2;PIK3CB;FOXO3;FGF2;FOXO1;PPP2R5E;PIP4K2A;PIP5K1B;SOS1
66	CREB phosphorylation through the activation of Ras_Homo sapiens_R-HSA-442742	2018-05-27	0.0132072	0.221515	0.0157336	0.222122	-1.31748	5.70073	CAMK2D;RPS6KA6;RASGRF2;BRAF;GRIN2C
67	Negative regulation of the PI3K/AKT network_Homo sapiens_R-HSA-199418	1990-10-01	0.0221166	0.292677	0.0186659	0.222122	-1.48241	5.65011	PHLPP1;EGF;PPP2R5E;GAB1;PIP4K2A;NRG1;PIP5K1B;NRG2;PIK3CB;FGF2
68	ARMS-mediated activation_Homo sapiens_R-HSA-170984	20/239	0.0327434	0.305648	0.0196218	0.222122	-1.61036	5.5059	CAMK2D;ANGPT1;KSR1;EGF;RASGRF2;BRAF;NRG1;RASAL2;NRG2;GRIN2C;FGF2;SPTB;PTK2;RAP1A;PSMA1;PPP2R5E;RASA1;NCAM1;TEK;SOS1
69	Signalling to p38 via RIT and RIN_Homo sapiens_R-HSA-187706	20/239	0.0327434	0.305648	0.0196218	0.222122	-1.58323	5.41315	CAMK2D;ANGPT1;KSR1;EGF;RASGRF2;BRAF;NRG1;RASAL2;NRG2;GRIN2C;FGF2;SPTB;PTK2;RAP1A;PSMA1;PPP2R5E;RASA1;NCAM1;TEK;SOS1
70	PI3K events in ERBB2 signaling_Homo sapiens_R-HSA-1963642	2018-04-16	0.00889717	0.215133	0.0127529	0.211223	-1.1209	5.29289	EGF;GAB1;NRG1;NRG2
71	Frs2-mediated activation_Homo sapiens_R-HSA-170968	20/240	0.0339968	0.307254	0.0203656	0.222122	-1.56324	5.28609	CAMK2D;ANGPT1;KSR1;EGF;RASGRF2;BRAF;NRG1;RASAL2;NRG2;GRIN2C;FGF2;SPTB;PTK2;RAP1A;PSMA1;PPP2R5E;RASA1;NCAM1;TEK;SOS1
72	MAPK1/MAPK3 signaling_Homo sapiens_R-HSA-5684996	20/241	0.0352854	0.314457	0.0211311	0.222457	-1.57089	5.25351	CAMK2D;ANGPT1;KSR1;EGF;RASGRF2;BRAF;NRG1;RASAL2;NRG2;GRIN2C;FGF2;SPTB;PTK2;RAP1A;PSMA1;PPP2R5E;RASA1;NCAM1;TEK;SOS1
73	Nitric oxide stimulates guanylate cyclase_Homo sapiens_R-HSA-392154	2018-05-25	0.00949411	0.216556	0.0120193	0.211223	-1.11788	5.20606	PDE1A;PDE3A;MRVI1;PDE5A;PRKG1
74	Prolonged ERK activation events_Homo sapiens_R-HSA-169893	20/242	0.0366099	0.314457	0.0219186	0.225785	-1.56117	5.16346	CAMK2D;ANGPT1;KSR1;EGF;RASGRF2;BRAF;NRG1;RASAL2;NRG2;GRIN2C;FGF2;SPTB;PTK2;RAP1A;PSMA1;PPP2R5E;RASA1;NCAM1;TEK;SOS1
75	IGF1R signaling cascade_Homo sapiens_R-HSA-2428924	23/288	0.0370949	0.314457	0.020557	0.222122	-1.56209	5.14594	CAMK2D;ANGPT1;KSR1;EGF;RASGRF2;GAB1;BRAF;NRG1;RASAL2;NRG2;PIK3CB;GRIN2C;FGF2;SPTB;PTK2;IGF1R;RAP1A;PSMA1;PPP2R5E;RASA1;NCAM1;TEK;SOS1
76	IRS-related events triggered by IGF1R_Homo sapiens_R-HSA-2428928	23/288	0.0370949	0.314457	0.020557	0.222122	-1.5524	5.11404	CAMK2D;ANGPT1;KSR1;EGF;RASGRF2;GAB1;BRAF;NRG1;RASAL2;NRG2;PIK3CB;GRIN2C;FGF2;SPTB;PTK2;IGF1R;RAP1A;PSMA1;PPP2R5E;RASA1;NCAM1;TEK;SOS1
77	O-glycosylation of TSR domain-containing proteins_Homo sapiens_R-HSA-5173214	1938-06-01	0.0148249	0.232824	0.0160778	0.222122	-1.21036	5.09736	SBSPON;SPON2;SPON1;ADAMTS3;ADAMTS17;ADAMTS6
78	Signaling by Type 1 Insulin-like Growth Factor 1 Receptor (IGF1R)_Homo sapiens_R-HSA-2404192	23/288	0.0370949	0.314457	0.020557	0.222122	-1.54305	5.08323	CAMK2D;ANGPT1;KSR1;EGF;RASGRF2;GAB1;BRAF;NRG1;RASAL2;NRG2;PIK3CB;GRIN2C;FGF2;SPTB;PTK2;IGF1R;RAP1A;PSMA1;PPP2R5E;RASA1;NCAM1;TEK;SOS1
79	GRB2 events in ERBB2 signaling_Homo sapiens_R-HSA-1963640	2018-04-16	0.00889717	0.215133	0.0127529	0.211223	-1.06669	5.03695	EGF;NRG1;NRG2;SOS1
80	Diseases of signal transduction_Homo sapiens_R-HSA-5663202	23/288	0.0370949	0.314457	0.020557	0.222122	-1.46859	4.83792	HDAC4;RNF43;GSK3B;TCF7L2;CTBP2;EGF;GAB1;NRG1;GAB2;NRG2;PIK3CB;FOXO3;HDAC8;FGF2;FOXO1;LRP6;PSMA1;PPP2R5E;RBP1;MAML3;TBL1X;SOS1;MAMLD1
81	Platelet activation, signaling and aggregation_Homo sapiens_R-HSA-76002	21/253	0.0315442	0.305648	0.018407	0.222122	-1.37948	4.76799	DGKG;TGFB2;TRPC6;EGF;PRKCE;PROS1;MPL;VEGFC;GP1BA;GAB2;PIK3CB;GP6;GP5;PTK2;GNA14;RAP1A;GNAQ;GNA12;PHACTR2;SOS1;RAPGEF4
82	Signalling to RAS_Homo sapiens_R-HSA-167044	20/246	0.042276	0.335699	0.0252966	0.248424	-1.46947	4.64872	CAMK2D;ANGPT1;KSR1;EGF;RASGRF2;BRAF;NRG1;RASAL2;NRG2;GRIN2C;FGF2;SPTB;PTK2;RAP1A;PSMA1;PPP2R5E;RASA1;NCAM1;TEK;SOS1
83	Regulation of insulin secretion_Homo sapiens_R-HSA-422356	1980-09-01	0.0270713	0.292677	0.0233947	0.236584	-1.2428	4.48562	KCNG2;CHRM3;GNA14;RAP1A;PRKAR2B;STXBP1;GNAQ;PLCB1;RAPGEF4
84	VEGFR2 mediated cell proliferation_Homo sapiens_R-HSA-5218921	20/248	0.0453367	0.350263	0.0271279	0.257313	-1.43563	4.44131	CAMK2D;ANGPT1;KSR1;EGF;RASGRF2;BRAF;NRG1;RASAL2;NRG2;GRIN2C;FGF2;SPTB;PTK2;RAP1A;PSMA1;PPP2R5E;RASA1;NCAM1;TEK;SOS1
85	Cardiac conduction_Homo sapiens_R-HSA-5576891	13/135	0.029325	0.292677	0.0217252	0.225785	-1.19325	4.21137	CAMK2D;KCNIP1;KCNK9;KCNK10;CACNA2D3;RYR3;HIPK2;SLC8A3;CACNB4;STIM1;SCN11A;FGF13;SCN3B
86	SHC1 events in ERBB2 signaling_Homo sapiens_R-HSA-1250196	2018-04-18	0.0137374	0.221515	0.0178845	0.222122	-0.93108	3.99213	EGF;NRG1;NRG2;SOS1
87	IRS-mediated signalling_Homo sapiens_R-HSA-112399	22/284	0.05364	0.375464	0.0306107	0.274066	-1.34482	3.93421	CAMK2D;ANGPT1;KSR1;EGF;RASGRF2;GAB1;BRAF;NRG1;RASAL2;NRG2;PIK3CB;GRIN2C;FGF2;SPTB;PTK2;RAP1A;PSMA1;PPP2R5E;RASA1;NCAM1;TEK;SOS1
88	Signalling to ERKs_Homo sapiens_R-HSA-187687	20/253	0.053682	0.375464	0.0321454	0.277435	-1.33021	3.89042	CAMK2D;ANGPT1;KSR1;EGF;RASGRF2;BRAF;NRG1;RASAL2;NRG2;GRIN2C;FGF2;SPTB;PTK2;RAP1A;PSMA1;PPP2R5E;RASA1;NCAM1;TEK;SOS1
89	Signal Transduction_Homo sapiens_R-HSA-162582	151/2465	0.0414304	0.335699	0.0015391	0.0713877	-1.22123	3.88809	DGKG;CHRM2;NCKAP1;CHRM3;OR5K4;HHIP;WIPF3;RRH;ARHGAP39;FGF2;CDC14A;RXFP2;IGF1R;CDC14B;MYLK;RGS5;GPR176;RPS6KA5;OPHN1;CDH1;LEPR;PIP4K2A;OR13D1;SOX6;PDE8A;RGS6;RNF43;WNT5B;PRKCE;OR2L5;CAMKMT;TIAM2;AR;RBP2;DAAM1;RBP1;AGTR1;ELMO1;MAML3;MYL9;NOTCH3;KHDRBS2;TAS2R41;CALCB;CTBP2;TAS2R42;PDE1C;PDE1A;NEDD4L;RASAL2;FOXO3;NLK;ARHGAP15;KALRN;FOXO1;CRHR2;STK3;RAP1A;GRK5;PRKAR2B;PDGFC;PIP5K1B;SFN;SRGAP3;SRGAP1;M…
90	Retinoid metabolism and transport_Homo sapiens_R-HSA-975634	1942-06-01	0.0235303	0.292677	0.0239095	0.238597	-1.03667	3.88697	RBP2;LRP1;RBP1;AKR1C3;GPC5;GPC6
91	PI5P, PP2A and IER3 Regulate PI3K/AKT Signaling_Homo sapiens_R-HSA-6811558	1983-09-01	0.0333489	0.305648	0.0283079	0.258276	-1.1398	3.87614	EGF;PPP2R5E;GAB1;PIP4K2A;NRG1;PIP5K1B;NRG2;PIK3CB;FGF2
92	YAP1- and WWTR1 (TAZ)-stimulated gene expression_Homo sapiens_R-HSA-2032785	2018-05-29	0.0177916	0.251227	0.0201434	0.222122	-0.923868	3.72229	NCOA1;NCOA2;TBL1X;RUNX2;HIPK2
93	Rho GTPase cycle_Homo sapiens_R-HSA-194840	12/122	0.0306909	0.303112	0.0234609	0.236584	-1.05344	3.66995	TIAM2;ARHGAP32;STARD13;OPHN1;RASGRF2;ARHGAP39;SRGAP3;ARHGAP15;SOS1;ARHGAP6;SRGAP1;KALRN
94	Voltage gated Potassium channels_Homo sapiens_R-HSA-1296072	1943-06-01	0.0261471	0.292677	0.0262057	0.253587	-1.00632	3.66706	KCNG2;KCNC1;KCNQ3;KCNQ4;KCNQ5;KCNH1
95	Interaction between L1 and Ankyrins_Homo sapiens_R-HSA-445095	2018-05-29	0.0177916	0.251227	0.0201434	0.222122	-0.901694	3.63295	NFASC;SCN11A;KCNQ3;SCN3B;SPTB
96	Insulin receptor signalling cascade_Homo sapiens_R-HSA-74751	22/287	0.0588003	0.401636	0.033617	0.287198	-1.27486	3.61247	CAMK2D;ANGPT1;KSR1;EGF;RASGRF2;GAB1;BRAF;NRG1;RASAL2;NRG2;PIK3CB;GRIN2C;FGF2;SPTB;PTK2;RAP1A;PSMA1;PPP2R5E;RASA1;NCAM1;TEK;SOS1
97	L1CAM interactions_Homo sapiens_R-HSA-373760	1996-10-01	0.0328413	0.305648	0.0268525	0.257247	-1.03093	3.52173	DNM3;NFASC;RPS6KA6;RPS6KA5;SCN11A;KCNQ3;CNTN2;NCAM1;SCN3B;SPTB
98	Tie2 Signaling_Homo sapiens_R-HSA-210993	2018-04-18	0.0137374	0.221515	0.0178845	0.222122	-0.763233	3.27246	ANGPT1;PIK3CB;TEK;SOS1
99	Signaling by ERBB2_Homo sapiens_R-HSA-1227986	1945-06-01	0.0319432	0.305648	0.0312266	0.276854	-0.945957	3.25768	DIAPH1;EGF;GAB1;NRG1;NRG2;SOS1
100	Potassium Channels_Homo sapiens_R-HSA-1296071	1999-10-01	0.0393824	0.325244	0.031789	0.276854	-0.976965	3.15993	KCNG2;GABBR1;KCNJ10;KCNC1;KCNK9;KCNK10;KCNQ3;KCNQ4;KCNQ5;KCNH1
101	Transport of inorganic cations/anions and amino acids/oligopeptides_Homo sapiens_R-HSA-425393	1999-10-01	0.0393824	0.325244	0.031789	0.276854	-0.954973	3.0888	SLC9A2;SLC36A1;SLC8A3;SLC15A2;SLC24A3;SLC12A1;SLC16A10;SLC26A4;SLC4A4;SLC38A4
102	Phase 0 - rapid depolarisation_Homo sapiens_R-HSA-5576892	1944-06-01	0.0289499	0.292677	0.0286438	0.258875	-0.871803	3.08809	CAMK2D;CACNB4;SCN11A;CACNA2D3;FGF13;SCN3B
103	Signaling by Robo receptor_Homo sapiens_R-HSA-376176	1932-05-01	0.0264542	0.292677	0.0281547	0.258276	-0.847241	3.07747	ENAH;ARHGAP39;SRGAP3;SOS1;SRGAP1
104	Signaling by VEGF_Homo sapiens_R-HSA-194138	24/328	0.0763668	0.48773	0.0421232	0.321585	-1.15214	2.96354	NCKAP1;CAMK2D;ANGPT1;KSR1;EGF;RASGRF2;VEGFC;BRAF;NRG1;RASAL2;NRG2;PIK3CB;GRIN2C;FGF2;SPTB;PTK2;RAP1A;PSMA1;PPP2R5E;RASA1;ELMO1;NCAM1;TEK;SOS1
105	PI3K/AKT Signaling in Cancer_Homo sapiens_R-HSA-2219528	1986-09-01	0.0405659	0.332155	0.0339042	0.287198	-0.903963	2.89704	GSK3B;EGF;GAB1;NRG1;NRG2;PIK3CB;FOXO3;FGF2;FOXO1
106	Diseases of glycosylation_Homo sapiens_R-HSA-3781865	1988-09-01	0.0459235	0.351958	0.0380335	0.301125	-0.814312	2.50871	SBSPON;NOTCH3;SPON2;SPON1;ADAMTS3;ADAMTS17;GPC5;GPC6;ADAMTS6
107	VEGFA-VEGFR2 Pathway_Homo sapiens_R-HSA-4420097	23/320	0.0942196	0.537276	0.0535868	0.376268	-0.996067	2.35284	NCKAP1;CAMK2D;ANGPT1;KSR1;EGF;RASGRF2;BRAF;NRG1;RASAL2;NRG2;PIK3CB;GRIN2C;FGF2;SPTB;PTK2;RAP1A;PSMA1;PPP2R5E;RASA1;ELMO1;NCAM1;TEK;SOS1
108	Integration of energy metabolism_Homo sapiens_R-HSA-163685	10/110	0.0708355	0.461635	0.0552918	0.376268	-0.850216	2.25086	KCNG2;CHRM3;PFKFB1;GNA14;RAP1A;PRKAR2B;STXBP1;GNAQ;PLCB1;RAPGEF4
109	GABA synthesis, release, reuptake and degradation_Homo sapiens_R-HSA-888590	2018-04-19	0.0166773	0.249639	0.0208674	0.222122	-0.521044	2.133	STXBP1;GAD1;SLC6A13;ABAT
110	Signaling by Rho GTPases_Homo sapiens_R-HSA-194315	26/367	0.0901438	0.520227	0.0481442	0.356699	-0.87852	2.11403	NCKAP1;RASGRF2;WIPF3;ARHGAP39;ARHGAP15;KALRN;ARHGAP6;MYLK;OPHN1;CDH1;PPP2R5E;SFN;SRGAP3;SRGAP1;SCAI;NCOA2;STARD13;PTK2;TIAM2;AR;ARHGAP32;DIAPH1;DAAM1;CENPP;SOS1;MYL9
111	Diseases associated with O-glycosylation of proteins_Homo sapiens_R-HSA-3906995	1962-07-01	0.0473087	0.359696	0.0422962	0.321585	-0.64784	1.9766	SBSPON;NOTCH3;SPON2;SPON1;ADAMTS3;ADAMTS17;ADAMTS6
112	G alpha (q) signalling events_Homo sapiens_R-HSA-416476	15/191	0.089493	0.520227	0.0606532	0.395278	-0.807181	1.94821	DGKG;CHRM3;TRPC6;PRKCE;TACR1;HTR2A;KALRN;GNA14;PLCB4;GRK5;GNAQ;AGTR1;GNRH2;GNRHR;PLCB1
113	Signaling by Insulin receptor_Homo sapiens_R-HSA-74752	22/311	0.112844	0.59398	0.0660967	0.416583	-0.881184	1.92252	CAMK2D;ANGPT1;KSR1;EGF;RASGRF2;GAB1;BRAF;NRG1;RASAL2;NRG2;PIK3CB;GRIN2C;FGF2;SPTB;PTK2;RAP1A;PSMA1;PPP2R5E;RASA1;NCAM1;TEK;SOS1
114	EGFR interacts with phospholipase C-gamma_Homo sapiens_R-HSA-212718	1934-05-01	0.0335001	0.305648	0.0344757	0.287198	-0.534421	1.81501	PDE1C;EGF;PRKAR2B;PRKCE;PDE1A
115	Peptide hormone metabolism_Homo sapiens_R-HSA-2980736	1981-08-01	0.0682236	0.447659	0.0570094	0.379271	-0.670403	1.80001	PCSK1;TCF7L2;CPB2;CPB1;MME;EXOC4;RAB27A;PAX6
116	Chondroitin sulfate/dermatan sulfate metabolism_Homo sapiens_R-HSA-1793185	1950-06-01	0.0498849	0.372921	0.0463956	0.349976	-0.566441	1.69821	CSGALNACT1;CHST11;UST;GPC5;CHSY3;GPC6
117	Signaling by PTK6_Homo sapiens_R-HSA-8848021	1967-07-01	0.0667711	0.44115	0.0579817	0.382993	-0.627009	1.69699	KHDRBS2;EGF;RASA1;ELMO1;NRG1;NRG2;RASAL2
118	Post NMDA receptor activation events_Homo sapiens_R-HSA-438064	1935-05-01	0.0374197	0.314457	0.0379398	0.301125	-0.504677	1.65815	CAMK2D;RPS6KA6;RASGRF2;BRAF;GRIN2C
119	Signaling by the B Cell Receptor (BCR)_Homo sapiens_R-HSA-983705	17/233	0.122549	0.625651	0.0797549	0.474725	-0.786799	1.65168	GSK3B;PHLPP1;EGF;GAB1;CBLB;NRG1;NRG2;PIK3CB;FOXO3;FGF2;FOXO1;PSMA1;STIM1;PPP2R5E;PIP4K2A;PIP5K1B;SOS1
120	Synthesis of PIPs at the plasma membrane_Homo sapiens_R-HSA-1660499	1934-05-01	0.0335001	0.305648	0.0344757	0.287198	-0.470637	1.59838	INPP4B;PI4K2B;PIP4K2A;PIP5K1B;PIK3CB
121	Regulation of FZD by ubiquitination_Homo sapiens_R-HSA-4641263	2018-04-21	0.0236619	0.292677	0.0277011	0.257647	-0.423675	1.58619	RNF43;ZNRF3;LGR6;LRP6
122	Metabolism of vitamins and cofactors_Homo sapiens_R-HSA-196854	12/148	0.10037	0.549453	0.0732588	0.449884	-0.633791	1.45702	RBP2;LRP1;PCCA;GIF;RBP1;AKR1C3;GPC5;NMNAT3;PRSS3;GPC6;CTRC;GPHN
123	Fatty Acids bound to GPR40 (FFAR1) regulate insulin secretion_Homo sapiens_R-HSA-434316	2018-03-08	0.00701743	0.197727	0.012788	0.211223	-0.284645	1.41166	GNA14;GNAQ;PLCB1
124	FCERI mediated MAPK activation_Homo sapiens_R-HSA-2871796	20/289	0.146133	0.687502	0.0902787	0.497453	-0.70919	1.36394	CAMK2D;ANGPT1;KSR1;EGF;RASGRF2;BRAF;NRG1;RASAL2;NRG2;GRIN2C;FGF2;SPTB;PTK2;RAP1A;PSMA1;PPP2R5E;RASA1;NCAM1;TEK;SOS1
125	Synthesis of very long-chain fatty acyl-CoAs_Homo sapiens_R-HSA-75876	2018-04-21	0.0236619	0.292677	0.0277011	0.257647	-0.330244	1.2364	ELOVL2;ELOVL6;ACSBG1;ELOVL7
126	SLC-mediated transmembrane transport_Homo sapiens_R-HSA-425407	19/268	0.13096	0.655671	0.0820137	0.476177	-0.592311	1.20409	SLC36A1;SLC14A1;SLC15A2;SLC13A4;SLC24A3;SLC2A13;SLC12A1;SLC6A13;SLC16A10;CP;SLC4A4;RUNX1;SLC8A3;SLC9A2;SLC5A9;SLCO3A1;SLC16A7;SLC26A4;SLC38A4
127	Downstream signaling events of B Cell Receptor (BCR)_Homo sapiens_R-HSA-1168372	14/192	0.150666	0.688242	0.105063	0.536354	-0.614512	1.16308	GSK3B;PHLPP1;EGF;GAB1;NRG1;NRG2;PIK3CB;FOXO3;FGF2;FOXO1;PSMA1;PPP2R5E;PIP4K2A;PIP5K1B
128	Free fatty acids regulate insulin secretion_Homo sapiens_R-HSA-400451	2018-03-08	0.00701743	0.197727	0.012788	0.211223	-0.230728	1.14426	GNA14;GNAQ;PLCB1
129	Metabolism of fat-soluble vitamins_Homo sapiens_R-HSA-6806667	1951-06-01	0.0540856	0.375464	0.0498932	0.356699	-0.36298	1.05888	RBP2;LRP1;RBP1;AKR1C3;GPC5;GPC6
130	Transmembrane transport of small molecules_Homo sapiens_R-HSA-382551	38/594	0.147835	0.687502	0.0673951	0.42199	-0.5044	0.964242	GABRB1;CAMK2D;SLC24A3;ABCB5;NEDD4L;BEST3;SLC4A4;RYR3;GLRA1;GLRA2;PRKAR2B;ANO10;SLC16A7;SLC38A4;ASIC1;SLC36A1;SLC14A1;ABCG8;TRPC5;SLC15A2;TRPC6;SLC13A4;ATP8B1;SLC2A13;SLC12A1;ABCA9;SLC6A13;SLC16A10;ATP11A;CP;RUNX1;SLC8A3;SLC9A2;ABCA10;SLC5A9;SLCO3A1;SLC26A4;SGK2
131	G alpha (s) signalling events_Homo sapiens_R-HSA-418555	11/142	0.140798	0.674421	0.105026	0.536354	-0.463223	0.908117	GPR176;CALCB;GRK5;PDE1A;PDE4D;PDE3A;PTH2R;PDE8A;RXFP2;TSHR;CRHR2
132	Chromatin modifying enzymes_Homo sapiens_R-HSA-3247509	16/226	0.156706	0.699735	0.104979	0.536354	-0.479614	0.888909	NCOA1;NCOA2;KMT2A;KMT2C;ELP4;ARID1A;HDAC8;ARID1B;GATAD2B;SUPT3H;PHF21A;KANSL1;KAT6B;TBL1X;SMYD3;KDM6A
133	Chromatin organization_Homo sapiens_R-HSA-4839726	16/226	0.156706	0.699735	0.104979	0.536354	-0.47141	0.873705	NCOA1;NCOA2;KMT2A;KMT2C;ELP4;ARID1A;HDAC8;ARID1B;GATAD2B;SUPT3H;PHF21A;KANSL1;KAT6B;TBL1X;SMYD3;KDM6A
134	Factors involved in megakaryocyte development and platelet production_Homo sapiens_R-HSA-983231	11/141	0.136045	0.657156	0.1015	0.531349	-0.420763	0.839326	RAD51B;HBG1;DOCK9;PRKAR2B;KIF26B;CABLES1;KIF21A;ZFPM2;ZFPM1;KIF6;PHF21A
135	Activation of NMDA receptor upon glutamate binding and postsynaptic events_Homo sapiens_R-HSA-442755	1939-05-01	0.0558113	0.384656	0.0538653	0.376268	-0.218791	0.631382	CAMK2D;RPS6KA6;RASGRF2;BRAF;GRIN2C
136	Signaling by GPCR_Homo sapiens_R-HSA-372790	77/1293	0.178401	0.71299	0.0485648	0.356699	-0.287489	0.495551	TAS2R60;DGKG;CHRM2;CHRM3;OR5K4;RASGRF2;RRH;PIK3CB;HTR2A;FGF2;RXFP2;GRM3;RGS5;GPR176;PPP2R5E;GNRHR;OR13D1;PDE8A;RGS6;GPR39;TRPC6;KSR1;PRKCE;PDE4D;OR2L5;PTH2R;NRG1;NRG2;GAB2;TACR1;SPTB;OR10Z1;TIAM2;PLCB4;PSMA1;RASA1;AGTR1;OR10A2;PLCB1;SOS1;RGS17;CAMK2D;TAS2R41;CALCB;TAS2R42;PDE1C;PDE1A;PTGER3;WNT8B;RASAL2;KALRN;CRHR2;GNA14;RAP1A;GRK5;PRKAR2B;OR2AG1;GNA12;RGS20;NCAM1;GABBR1;FZD3;OR5H2;ANGPT1;HTR1F;E…
137	Phospholipase C-mediated cascade; FGFR3_Homo sapiens_R-HSA-5654227	1944-05-01	0.0849332	0.511736	0.0784594	0.47273	-0.175301	0.432273	PDE1C;PRKAR2B;PRKCE;PDE1A;FGF2
138	Constitutive Signaling by Aberrant PI3K in Cancer_Homo sapiens_R-HSA-2219530	1961-06-01	0.107469	0.575172	0.093581	0.506501	-0.163322	0.364298	EGF;GAB1;NRG1;NRG2;PIK3CB;FGF2
139	PLC beta mediated events_Homo sapiens_R-HSA-112043	1944-05-01	0.0849332	0.511736	0.0784594	0.47273	-0.14175	0.349539	PLCB4;PDE1C;PRKAR2B;PDE1A;PLCB1
140	Fatty Acyl-CoA Biosynthesis_Homo sapiens_R-HSA-75105	1942-05-01	0.0724756	0.469133	0.0680005	0.423016	-0.0966005	0.253528	ELOVL2;SCD5;ELOVL6;ACSBG1;ELOVL7
141	Signaling by Interleukins_Homo sapiens_R-HSA-449147	25/392	0.211043	0.768742	0.123623	0.592152	-0.148735	0.231385	CAMK2D;RASGRF2;IL24;RASAL2;PIK3CB;FGF2;RAP1A;PPP2R5E;NCAM1;ANGPT1;KSR1;EGF;BRAF;NRG1;NRG2;GAB2;GRIN2C;SPTB;PTK2;TEC;PSMA1;IL7;RASA1;TEK;SOS1
142	Class C/3 (Metabotropic glutamate/pheromone receptors)_Homo sapiens_R-HSA-420499	1940-05-01	0.0610934	0.409283	0.0583685	0.382993	-0.061222	0.171137	TAS2R60;GRM3;GABBR1;TAS2R41;TAS2R42
143	G-protein mediated events_Homo sapiens_R-HSA-112040	1945-05-01	0.0915569	0.525219	0.0839945	0.484739	-0.0676091	0.16164	PLCB4;PDE1C;PRKAR2B;PDE1A;PLCB1
144	Stimuli-sensing channels_Homo sapiens_R-HSA-2672351	8/100	0.167626	0.708898	0.134553	0.628788	-0.0642721	0.114791	TRPC5;TRPC6;ANO10;NEDD4L;BEST3;SGK2;RYR3;ASIC1
145	Phospholipase C-mediated cascade; FGFR4_Homo sapiens_R-HSA-5654228	1946-05-01	0.0984382	0.548278	0.0897301	0.497453	-0.0339637	0.0787389	PDE1C;PRKAR2B;PRKCE;PDE1A;FGF2
146	NOTCH1 Intracellular Domain Regulates Transcription_Homo sapiens_R-HSA-2122947	1947-05-01	0.105572	0.5714	0.0956634	0.511986	-0.0304622	0.0684902	HDAC4;MAML3;TBL1X;HDAC8;MAMLD1
147	Signaling by Wnt_Homo sapiens_R-HSA-195721	19/295	0.235906	0.803755	0.153687	0.649146	-0.0151345	0.0218591	RNF43;GSK3B;TCF7L2;FZD3;CTBP2;WNT5B;SMURF1;WNT8B;NLK;LRP6;ZNRF3;PSMA1;DAAM1;PPP2R5E;PIP5K1B;SOX6;LGR6;PLCB1;PRKG1
148	Gene Expression_Homo sapiens_R-HSA-74160	43/1631	1	1	1	1	5.61507	-4.91562e-08	GSK3B;NOTCH3;THRB;NEDD4L;RORA;ADARB1;RORB;SMG7;NR3C2;FARS2;SMG6;PLAGL1;HNF4A;MAEL;SFN;ZNF468;IGF2BP2;TBL1X;JARID2;ZNF782;NCOA1;NCOA2;HNRNPA3;CRADD;ESRRB;CDKAL1;ESRRG;MED27;GATAD2B;RUNX2;HIPK2;CNOT4;AR;NR6A1;PAN3;NFIA;PSMA1;NFIB;ZNF215;MAML3;MNAT1;MAMLD1;TAF3
149	Cell Cycle_Homo sapiens_R-HSA-1640170	11/566	0.99999	1	0.999918	1	6.15289	-5.98531e-05	PRIM2;PSMA1;PRKAR2B;PPP2R5E;SFN;E2F3;CENPP;MNAT1;HDAC8;CDC14A;SMC1B
150	Processing of Capped Intron-Containing Pre-mRNA_Homo sapiens_R-HSA-72203	1/193	0.999977	1	0.99992	1	5.67203	-0.000129787	HNRNPA3
151	Cell Cycle, Mitotic_Homo sapiens_R-HSA-69278	9/462	0.999944	1	0.999668	1	6.16529	-0.000343343	PRIM2;PSMA1;PRKAR2B;PPP2R5E;E2F3;CENPP;MNAT1;HDAC8;CDC14A
152	M Phase_Homo sapiens_R-HSA-68886	4/268	0.999743	1	0.999071	1	6.07893	-0.00156018	PSMA1;PPP2R5E;CENPP;HDAC8
153	mRNA Splicing_Homo sapiens_R-HSA-72172	1/144	0.999652	1	0.999113	1	5.52009	-0.00192335	HNRNPA3
154	Infectious disease_Homo sapiens_R-HSA-5663205	7/348	0.999523	1	0.998122	1	5.90878	-0.00281963	MSRA;PSMA1;PACS1;ELMO1;NEDD4L;MNAT1;TAF3
155	Cell Cycle Checkpoints_Homo sapiens_R-HSA-69620	2/182	0.999519	1	0.998652	1	6.07391	-0.00292395	PSMA1;SFN
156	mRNA Splicing - Major Pathway_Homo sapiens_R-HSA-72163	1/134	0.999393	1	0.998554	1	5.49394	-0.00333442	HNRNPA3
157	Cellular responses to stress_Homo sapiens_R-HSA-2262752	8/367	0.999295	1	0.997263	1	5.75968	-0.00406416	GSK3B;CAMK2D;SCMH1;ATG10;HMGA2;E2F3;TNIK;RLN1
158	Metabolism of amino acids and derivatives_Homo sapiens_R-HSA-71291	7/335	0.999206	1	0.997107	1	5.45298	-0.00433163	EEFSEC;CKMT2;TMLHE;PSMA1;DIO1;BCKDHB;SLC25A21
159	Olfactory Signaling Pathway_Homo sapiens_R-HSA-381753	10/418	0.999155	1	0.996554	1	5.20758	-0.00439999	OR10Z1;OR5H2;OR5K4;OR2AG1;OR2L5;OR1L6;OR10A2;OR2A7;OR13D1;OR6A2
160	Organelle biogenesis and maintenance_Homo sapiens_R-HSA-1852241	7/326	0.998876	1	0.996117	1	5.45021	-0.00613157	NCOA1;NCOA2;PRKAR2B;EXOC4;BBS9;ASAP1;TBL1X
161	Transcriptional Regulation by TP53_Homo sapiens_R-HSA-3700989	8/348	0.998568	1	0.995031	1	5.57607	-0.00799072	CNOT4;CRADD;PLAGL1;SFN;MNAT1;TAF3;GATAD2B;HIPK2
162	Peptide ligand-binding receptors_Homo sapiens_R-HSA-375276	3/193	0.998338	1	0.995682	1	5.16946	-0.00859911	AGTR1;TACR1;RXFP2
163	DNA Repair_Homo sapiens_R-HSA-73894	6/285	0.998214	1	0.994516	1	5.52399	-0.00987724	RAD51B;EYA1;MGMT;MNAT1;SPIDR;PIAS1
164	Activated TLR4 signalling_Homo sapiens_R-HSA-166054	1/112	0.997946	1	0.995776	1	5.76307	-0.0118521	RPS6KA5
165	Selenoamino acid metabolism_Homo sapiens_R-HSA-2408522	1/111	0.997829	1	0.995565	1	5.58766	-0.0121468	EEFSEC
166	FCERI mediated NF-kB activation_Homo sapiens_R-HSA-2871837	1/111	0.997829	1	0.995565	1	5.64946	-0.0122811	PSMA1
167	G2/M Checkpoints_Homo sapiens_R-HSA-69481	2/150	0.997612	1	0.994571	1	6.00688	-0.0143597	PSMA1;SFN
168	tRNA processing_Homo sapiens_R-HSA-72306	1/103	0.996618	1	0.993455	1	5.94381	-0.0201379	CDKAL1
169	Toll-Like Receptors Cascades_Homo sapiens_R-HSA-168898	2/140	0.996091	1	0.991673	1	5.62688	-0.0220396	DNM3;RPS6KA5
170	Gene Silencing by RNA_Homo sapiens_R-HSA-211000	1/101	0.996222	1	0.992786	1	5.97942	-0.0226359	MAEL
171	Protein folding_Homo sapiens_R-HSA-391251	1/101	0.996222	1	0.992786	1	6.04085	-0.0228684	RGS6
172	G2/M Transition_Homo sapiens_R-HSA-69275	3/173	0.995864	1	0.990537	1	5.52361	-0.0228948	PSMA1;PRKAR2B;MNAT1
173	Phase II conjugation_Homo sapiens_R-HSA-156580	1/100	0.996006	1	0.992427	1	5.96387	-0.023865	GLYATL1
174	MyD88-independent TLR3/TLR4 cascade_Homo sapiens_R-HSA-166166	1997-01-01	0.995285	1	0.991238	1	5.86988	-0.0277434	RPS6KA5
175	Toll Like Receptor 3 (TLR3) Cascade_Homo sapiens_R-HSA-168164	1997-01-01	0.995285	1	0.991238	1	5.8784	-0.0277836	RPS6KA5
176	TRIF-mediated TLR3/TLR4 signaling_Homo sapiens_R-HSA-937061	1997-01-01	0.995285	1	0.991238	1	5.88899	-0.0278337	RPS6KA5
177	Anchoring of the basal body to the plasma membrane_Homo sapiens_R-HSA-5620912	1997-01-01	0.995285	1	0.991238	1	6.00097	-0.028363	PRKAR2B
178	Generic Transcription Pathway_Homo sapiens_R-HSA-212436	29/812	0.994019	1	0.973722	1	5.2837	-0.0316993	NOTCH3;THRB;NEDD4L;RORA;RORB;NR3C2;PLAGL1;HNF4A;SFN;ZNF468;TBL1X;NCOA1;ZNF782;NCOA2;CRADD;ESRRB;ESRRG;MED27;GATAD2B;RUNX2;HIPK2;CNOT4;AR;NR6A1;ZNF215;MAML3;MNAT1;MAMLD1;TAF3
179	Chaperonin-mediated protein folding_Homo sapiens_R-HSA-390466	1995-01-01	0.994733	1	0.990343	1	6.15135	-0.0324868	RGS6
180	MyD88:Mal cascade initiated on plasma membrane_Homo sapiens_R-HSA-166058	1992-01-01	0.993781	1	0.988828	1	5.96549	-0.0372144	RPS6KA5
181	Toll Like Receptor 2 (TLR2) Cascade_Homo sapiens_R-HSA-181438	1992-01-01	0.993781	1	0.988828	1	5.96759	-0.0372275	RPS6KA5
182	Toll Like Receptor TLR6:TLR2 Cascade_Homo sapiens_R-HSA-168188	1992-01-01	0.993781	1	0.988828	1	5.98187	-0.0373166	RPS6KA5
183	Toll Like Receptor TLR1:TLR2 Cascade_Homo sapiens_R-HSA-168179	1992-01-01	0.993781	1	0.988828	1	5.98213	-0.0373182	RPS6KA5
184	Assembly of the primary cilium_Homo sapiens_R-HSA-5617833	4/187	0.991418	1	0.981248	1	5.2454	-0.0452112	PRKAR2B;EXOC4;BBS9;ASAP1
185	RNA Polymerase II Transcription_Homo sapiens_R-HSA-73857	2/124	0.991476	1	0.983643	1	5.39549	-0.0461895	MNAT1;TAF3
186	Toll Like Receptor 9 (TLR9) Cascade_Homo sapiens_R-HSA-168138	1988-01-01	0.99224	1	0.986433	1	6.10885	-0.0475888	RPS6KA5
187	Selenocysteine synthesis_Homo sapiens_R-HSA-2408557	1987-01-01	0.991799	1	0.985758	1	6.06007	-0.0499059	EEFSEC
188	Regulation of PLK1 Activity at G2/M Transition_Homo sapiens_R-HSA-2565942	1987-01-01	0.991799	1	0.985758	1	6.13364	-0.0505118	PRKAR2B
189	Toll Like Receptor 4 (TLR4) Cascade_Homo sapiens_R-HSA-166016	2/122	0.990612	1	0.982218	1	5.37049	-0.0506581	DNM3;RPS6KA5
190	Metabolism of proteins_Homo sapiens_R-HSA-392499	42/1074	0.989927	1	0.953045	1	5.12979	-0.0519324	SPON2;PCSK1;CPB2;SPON1;CPB1;PROS1;FUT8;ADAMTS3;GMDS;SCMH1;ADAMTS17;MAN1C1;ST8SIA5;DYNC1I1;RGS6;ADAMTS6;SNCA;SBSPON;FN3K;SEC16B;TCF7L2;ST6GAL2;MME;IGFBP5;ST8SIA1;PCGF2;SFTPD;NSMCE2;SIAH1;RAB27A;ALG13;PAX6;TRAPPC9;SPTB;PIAS1;PIGC;MSRA;EXOC4;TPP1;B4GALT6;SEC22A;CNIH3
191	The citric acid (TCA) cycle and respiratory electron transport_Homo sapiens_R-HSA-1428517	3/153	0.989938	1	0.979725	1	5.15976	-0.0521807	LDHC;NUBPL;NDUFAF2
192	Metabolism of nucleotides_Homo sapiens_R-HSA-15869	1987-01-01	0.991799	1	0.985758	1	6.33682	-0.0521849	ADK
193	Regulation of mRNA stability by proteins that bind AU-rich elements_Homo sapiens_R-HSA-450531	1986-01-01	0.991332	1	0.98505	1	6.2735	-0.0546157	PSMA1
194	Transport of glucose and other sugars, bile salts and organic acids, metal ions and amine compounds_Homo sapiens_R-HSA-425366	8/101	0.174124	0.712865	0.139664	0.634116	0.0318423	-0.0556601	SLC14A1;SLC5A9;SLC13A4;SLC2A13;SLC6A13;SLC16A7;CP;RUNX1
195	MyD88 dependent cascade initiated on endosome_Homo sapiens_R-HSA-975155	1985-01-01	0.990839	1	0.984306	1	6.0794	-0.0559508	RPS6KA5
196	Unfolded Protein Response (UPR)_Homo sapiens_R-HSA-381119	1986-01-01	0.991332	1	0.98505	1	6.44588	-0.0561164	TPP1
197	Toll Like Receptor 7/8 (TLR7/8) Cascade_Homo sapiens_R-HSA-168181	1985-01-01	0.990839	1	0.984306	1	6.09889	-0.0561302	RPS6KA5
198	Regulation of TP53 Activity_Homo sapiens_R-HSA-5633007	3/151	0.989018	1	0.97815	1	5.12495	-0.0565918	TAF3;GATAD2B;HIPK2
199	Meiosis_Homo sapiens_R-HSA-1500620	1985-01-01	0.990839	1	0.984306	1	6.28079	-0.0578043	SMC1B
200	Homology Directed Repair_Homo sapiens_R-HSA-5693538	2/118	0.988619	1	0.979	1	5.38521	-0.0616389	RAD51B;SPIDR
201	TP53 Regulates Metabolic Genes_Homo sapiens_R-HSA-5628897	1984-01-01	0.990318	1	0.983525	1	6.36962	-0.061973	SFN
202	TRAF6 mediated induction of NFkB and MAP kinases upon TLR7/8 or 9 activation_Homo sapiens_R-HSA-975138	1983-01-01	0.989767	1	0.982706	1	6.14868	-0.063244	RPS6KA5
203	Antigen processing-Cross presentation_Homo sapiens_R-HSA-1236975	1982-01-01	0.989185	1	0.981846	1	6.06155	-0.0659136	PSMA1
204	MyD88 cascade initiated on plasma membrane_Homo sapiens_R-HSA-975871	1982-01-01	0.989185	1	0.981846	1	6.19155	-0.0673272	RPS6KA5
205	Toll Like Receptor 10 (TLR10) Cascade_Homo sapiens_R-HSA-168142	1982-01-01	0.989185	1	0.981846	1	6.20228	-0.0674439	RPS6KA5
206	Toll Like Receptor 5 (TLR5) Cascade_Homo sapiens_R-HSA-168176	1982-01-01	0.989185	1	0.981846	1	6.20983	-0.067526	RPS6KA5
207	Mitotic G2-G2/M phases_Homo sapiens_R-HSA-453274	4/175	0.986041	1	0.971675	1	5.17578	-0.0727592	PSMA1;PRKAR2B;E2F3;MNAT1
208	DNA Double-Strand Break Repair_Homo sapiens_R-HSA-5693532	3/145	0.985748	1	0.972699	1	5.21402	-0.0748424	RAD51B;EYA1;SPIDR
209	Metabolism_Homo sapiens_R-HSA-1430728	83/1908	0.984695	1	0.906081	1	5.10741	-0.0787718	KCNG2;PI4K2B;CHRM3;HPSE2;PITPNB;CYP4A22;ADK;STAB2;RORA;PIK3CB;LCLAT1;GPHN;HS2ST1;GYS2;CA1;AKR7A3;SPTLC3;NDST3;PIP4K2A;PRSS3;CSGALNACT1;NCOA1;HS3ST3B1;NCOA2;ABCG8;GIF;ELOVL2;DIO1;BCKDHB;ELOVL6;ELOVL7;MED27;CYP7B1;TIAM2;INPP4B;SLC5A9;PLCB4;PCCA;RBP2;PSMA1;RBP1;ACSBG1;PLCB1;B4GALT6;RAPGEF4;PFKFB1;CEMIP;SGMS1;PPM1L;LRP1;STXBP1;GDPD1;TPTE;MTMR7;LDHC;CKMT2;GNA14;RAP1A;CHST11;PRKAR2B;PDSS2;PIP5K1B;CHSY3…
210	Mitotic Metaphase and Anaphase_Homo sapiens_R-HSA-2555396	4/174	0.98547	1	0.970699	1	5.42212	-0.0793587	PSMA1;PPP2R5E;CENPP;HDAC8
211	Ion channel transport_Homo sapiens_R-HSA-983712	14/203	0.201417	0.739878	0.141767	0.635926	0.0499836	-0.0800925	GABRB1;TRPC5;CAMK2D;TRPC6;ATP8B1;NEDD4L;ATP11A;BEST3;RYR3;GLRA1;GLRA2;ANO10;SGK2;ASIC1
212	HDR through Homologous Recombination (HR) or Single Strand Annealing (SSA)_Homo sapiens_R-HSA-5693567	2/112	0.984837	1	0.973093	1	5.30878	-0.0811142	RAD51B;SPIDR
213	Mitotic Anaphase_Homo sapiens_R-HSA-68882	4/173	0.984878	1	0.969691	1	5.40806	-0.0824043	PSMA1;PPP2R5E;CENPP;HDAC8
214	Regulation of APC/C activators between G1/S and early anaphase_Homo sapiens_R-HSA-176408	1979-01-01	0.987233	1	0.979003	1	6.42472	-0.0825554	PSMA1
215	Phospholipase C-mediated cascade: FGFR1_Homo sapiens_R-HSA-5654219	1947-05-01	0.105572	0.5714	0.0956634	0.511986	0.0376317	-0.0846098	PDE1C;PRKAR2B;PRKCE;PDE1A;FGF2
216	Centrosome maturation_Homo sapiens_R-HSA-380287	1979-01-01	0.987233	1	0.979003	1	6.63216	-0.085221	PRKAR2B
217	Recruitment of mitotic centrosome proteins and complexes_Homo sapiens_R-HSA-380270	1979-01-01	0.987233	1	0.979003	1	6.63937	-0.0853137	PRKAR2B
218	G2/M DNA damage checkpoint_Homo sapiens_R-HSA-69473	1978-01-01	0.986506	1	0.977959	1	6.4039	-0.0869996	SFN
219	HIV Life Cycle_Homo sapiens_R-HSA-162587	3/141	0.98307	1	0.968375	1	5.26091	-0.0898321	NEDD4L;MNAT1;TAF3
220	Negative epigenetic regulation of rRNA expression_Homo sapiens_R-HSA-5250941	1976-01-01	0.984928	1	0.975714	1	6.27919	-0.0953592	MNAT1
221	Respiratory electron transport, ATP synthesis by chemiosmotic coupling, and heat production by uncoupling proteins._Homo sapiens_R-HSA-163200	2/109	0.982512	1	0.969568	1	5.45425	-0.0962274	NUBPL;NDUFAF2
222	Transcription-Coupled Nucleotide Excision Repair (TC-NER)_Homo sapiens_R-HSA-6781827	1976-01-01	0.984928	1	0.975714	1	6.3488	-0.0964163	MNAT1
223	Nucleotide Excision Repair_Homo sapiens_R-HSA-5696398	2/108	0.981663	1	0.968297	1	5.21599	-0.0965341	MNAT1;PIAS1
224	Activation of APC/C and APC/C:Cdc20 mediated degradation of mitotic proteins_Homo sapiens_R-HSA-176814	1975-01-01	0.984071	1	0.974508	1	6.26103	-0.100534	PSMA1
225	HIV Infection_Homo sapiens_R-HSA-162906	6/222	0.981269	1	0.960518	1	5.49694	-0.103942	PSMA1;PACS1;ELMO1;NEDD4L;MNAT1;TAF3
226	Programmed Cell Death_Homo sapiens_R-HSA-5357801	4/166	0.980044	1	0.961682	1	5.15788	-0.10397	PSMA1;CDH1;SFN;PTK2
227	Nonsense Mediated Decay (NMD) enhanced by the Exon Junction Complex (EJC)_Homo sapiens_R-HSA-975957	2/106	0.979843	1	0.965601	1	5.19218	-0.105729	SMG7;SMG6
228	Nonsense-Mediated Decay (NMD)_Homo sapiens_R-HSA-927802	2/106	0.979843	1	0.965601	1	5.20274	-0.105945	SMG7;SMG6
229	APC/C:Cdc20 mediated degradation of mitotic proteins_Homo sapiens_R-HSA-176409	1974-01-01	0.983166	1	0.973242	1	6.39062	-0.108499	PSMA1
230	NoRC negatively regulates rRNA expression_Homo sapiens_R-HSA-427413	1973-01-01	0.982208	1	0.971912	1	6.32576	-0.113559	MNAT1
231	Triglyceride Biosynthesis_Homo sapiens_R-HSA-75109	1966-06-01	0.141564	0.674716	0.121231	0.587111	0.0586371	-0.114636	ELOVL2;SCD5;ELOVL6;ACSBG1;ELOVL7;LCLAT1
232	Apoptosis_Homo sapiens_R-HSA-109581	4/163	0.977554	1	0.957683	1	5.10954	-0.115993	PSMA1;CDH1;SFN;PTK2
233	TRAF6 Mediated Induction of proinflammatory cytokines_Homo sapiens_R-HSA-168180	1972-01-01	0.981197	1	0.970518	1	6.19272	-0.117551	RPS6KA5
234	Costimulation by the CD28 family_Homo sapiens_R-HSA-388841	1972-01-01	0.981197	1	0.970518	1	6.28558	-0.119314	PPP2R5E
235	APC:Cdc20 mediated degradation of cell cycle proteins prior to satisfation of the cell cycle checkpoint_Homo sapiens_R-HSA-179419	1972-01-01	0.981197	1	0.970518	1	6.32317	-0.120027	PSMA1
236	Separation of Sister Chromatids_Homo sapiens_R-HSA-2467813	4/162	0.976661	1	0.956266	1	5.13716	-0.121316	PSMA1;PPP2R5E;CENPP;HDAC8
237	MHC class II antigen presentation_Homo sapiens_R-HSA-2132295	2/103	0.97678	1	0.96114	1	5.18981	-0.121928	DNM3;DYNC1I1
238	AURKA Activation by TPX2_Homo sapiens_R-HSA-8854518	1972-01-01	0.981197	1	0.970518	1	6.47707	-0.122949	PRKAR2B
239	Antiviral mechanism by IFN-stimulated genes_Homo sapiens_R-HSA-1169410	1972-01-01	0.981197	1	0.970518	1	6.4778	-0.122962	EIF4G3
240	ISG15 antiviral mechanism_Homo sapiens_R-HSA-1169408	1972-01-01	0.981197	1	0.970518	1	6.52032	-0.12377	EIF4G3
241	APC/C:Cdh1 mediated degradation of Cdc20 and other APC/C:Cdh1 targeted proteins in late mitosis/early G1_Homo sapiens_R-HSA-174178	1971-01-01	0.980128	1	0.969054	1	6.24646	-0.12538	PSMA1
242	Glycerophospholipid biosynthesis_Homo sapiens_R-HSA-1483206	2/102	0.975663	1	0.959533	1	5.14064	-0.126657	PITPNB;LCLAT1
243	Cellular Senescence_Homo sapiens_R-HSA-2559583	4/161	0.975735	1	0.954807	1	5.17772	-0.127187	SCMH1;HMGA2;E2F3;TNIK
244	Cdc20:Phospho-APC/C mediated degradation of Cyclin A_Homo sapiens_R-HSA-174184	1971-01-01	0.980128	1	0.969054	1	6.34574	-0.127373	PSMA1
245	Removal of licensing factors from origins_Homo sapiens_R-HSA-69300	1972-01-01	0.981197	1	0.970518	1	6.73886	-0.127918	PSMA1
246	Lipid digestion, mobilization, and transport_Homo sapiens_R-HSA-73923	1971-01-01	0.980128	1	0.969054	1	6.37934	-0.128047	ABCG8
247	Orc1 removal from chromatin_Homo sapiens_R-HSA-68949	1970-01-01	0.978998	1	0.967517	1	6.66942	-0.141561	PSMA1
248	Switching of origins to a post-replicative state_Homo sapiens_R-HSA-69052	1970-01-01	0.978998	1	0.967517	1	6.67607	-0.141702	PSMA1
249	Loss of Nlp from mitotic centrosomes_Homo sapiens_R-HSA-380259	1969-01-01	0.977805	1	0.965904	1	6.44255	-0.144606	PRKAR2B
250	Loss of proteins required for interphase microtubule organization¬†from the centrosome_Homo sapiens_R-HSA-380284	1969-01-01	0.977805	1	0.965904	1	6.45682	-0.144927	PRKAR2B
251	Host Interactions of HIV factors_Homo sapiens_R-HSA-162909	3/129	0.971839	1	0.95121	1	5.08532	-0.145264	PSMA1;PACS1;ELMO1
252	CLEC7A (Dectin-1) signaling_Homo sapiens_R-HSA-5607764	1999-02-01	0.971989	1	0.954323	1	5.13632	-0.145926	PSMA1;NFATC2
253	Downstream TCR signaling_Homo sapiens_R-HSA-202424	1999-02-01	0.971989	1	0.954323	1	5.1537	-0.14642	PSMA1;PIK3CB
254	Late Phase of HIV Life Cycle_Homo sapiens_R-HSA-162599	3/128	0.970636	1	0.949443	1	5.03896	-0.150181	NEDD4L;MNAT1;TAF3
255	Macroautophagy_Homo sapiens_R-HSA-1632852	1967-01-01	0.97521	1	0.962435	1	6.77025	-0.169952	ATG10
256	APC/C:Cdc20 mediated degradation of Securin_Homo sapiens_R-HSA-174154	1966-01-01	0.973801	1	0.960571	1	6.40965	-0.170167	PSMA1
257	Activation of NF-kappaB in B cells_Homo sapiens_R-HSA-1169091	1966-01-01	0.973801	1	0.960571	1	6.46963	-0.171759	PSMA1
258	Synthesis of DNA_Homo sapiens_R-HSA-69239	1997-02-01	0.969249	1	0.9505	1	5.60045	-0.174924	PRIM2;PSMA1
259	S Phase_Homo sapiens_R-HSA-69242	3/124	0.96532	1	0.941761	1	5.03482	-0.177705	PRIM2;PSMA1;MNAT1
260	C-type lectin receptors (CLRs)_Homo sapiens_R-HSA-5621481	3/123	0.963856	1	0.939679	1	4.85422	-0.178698	RPS6KA5;PSMA1;NFATC2
261	ER-Phagosome pathway_Homo sapiens_R-HSA-1236974	1965-01-01	0.972312	1	0.958615	1	6.37422	-0.17898	PSMA1
262	Phospholipase C-mediated cascade; FGFR2_Homo sapiens_R-HSA-5654221	1949-05-01	0.120573	0.621013	0.10811	0.542019	0.0846271	-0.179029	PDE1C;PRKAR2B;PRKCE;PDE1A;FGF2
263	G1/S DNA Damage Checkpoints_Homo sapiens_R-HSA-69615	1965-01-01	0.972312	1	0.958615	1	6.51193	-0.182846	PSMA1
264	Biological oxidations_Homo sapiens_R-HSA-211859	6/199	0.959061	1	0.924483	1	4.37791	-0.182997	NCOA1;NCOA2;AKR7A3;GLYATL1;CYP4A22;CYP7B1
265	O-linked glycosylation of mucins_Homo sapiens_R-HSA-913709	1966-01-01	0.973801	1	0.960571	1	6.98028	-0.185316	B4GALT6
266	Synthesis of bile acids and bile salts via 7alpha-hydroxycholesterol_Homo sapiens_R-HSA-193368	2018-04-24	0.0370276	0.314457	0.0401836	0.310451	0.0566465	-0.186712	NCOA1;NCOA2;AKR1C3;CYP7B1
267	Metabolism of carbohydrates_Homo sapiens_R-HSA-71387	18/282	0.255228	0.831662	0.17019	0.649146	0.13971	-0.190788	CSGALNACT1;HS3ST3B1;PFKFB1;CEMIP;HPSE2;STAB2;HS3ST5;HS2ST1;EXT1;GYS2;SLC5A9;CHST11;NDST3;UST;GPC5;CHSY3;B4GALT6;GPC6
268	Dual incision in TC-NER_Homo sapiens_R-HSA-6782135	1963-01-01	0.969076	1	0.954406	1	6.30562	-0.198076	MNAT1
269	p53-Dependent G1 DNA Damage Response_Homo sapiens_R-HSA-69563	1963-01-01	0.969076	1	0.954406	1	6.48737	-0.203785	PSMA1
270	p53-Dependent G1/S DNA damage checkpoint_Homo sapiens_R-HSA-69580	1963-01-01	0.969076	1	0.954406	1	6.49484	-0.20402	PSMA1
271	Gap-filling DNA repair synthesis and ligation in TC-NER_Homo sapiens_R-HSA-6782210	1962-01-01	0.967318	1	0.952144	1	6.50653	-0.216196	MNAT1
272	Interferon Signaling_Homo sapiens_R-HSA-913531	6/196	0.954833	1	0.918099	1	4.68044	-0.216324	CAMK2D;NCAM1;TRIM10;MID1;EIF4G3;PIAS1
273	Autodegradation of Cdh1 by Cdh1:APC/C_Homo sapiens_R-HSA-174084	1962-01-01	0.967318	1	0.952144	1	6.51696	-0.216542	PSMA1
274	TCR signaling_Homo sapiens_R-HSA-202403	3/118	0.955623	1	0.928197	1	4.78243	-0.217085	ENAH;PSMA1;PIK3CB
275	MAP kinase activation in TLR cascade_Homo sapiens_R-HSA-450294	1960-01-01	0.963499	1	0.947279	1	6.2525	-0.232491	RPS6KA5
276	TP53 Regulates Transcription of DNA Repair Genes_Homo sapiens_R-HSA-6796648	1961-01-01	0.965462	1	0.94977	1	6.66285	-0.234193	MNAT1
277	Dectin-1 mediated noncanonical NF-kB signaling_Homo sapiens_R-HSA-5607761	1961-01-01	0.965462	1	0.94977	1	6.69343	-0.235268	PSMA1
278	Regulation of TP53 Activity through Phosphorylation_Homo sapiens_R-HSA-6804756	1989-02-01	0.955477	1	0.931942	1	5.24398	-0.238837	TAF3;HIPK2
279	Degradation of GLI1 by the proteasome_Homo sapiens_R-HSA-5610780	1959-01-01	0.961425	1	0.944665	1	6.42331	-0.252682	PSMA1
280	SCF(Skp2)-mediated degradation of p27/p21_Homo sapiens_R-HSA-187577	1959-01-01	0.961425	1	0.944665	1	6.47966	-0.254899	PSMA1
281	DNA Double Strand Break Response_Homo sapiens_R-HSA-5693606	1959-01-01	0.961425	1	0.944665	1	6.62195	-0.260496	EYA1
282	The role of GTSE1 in G2/M progression after G2 checkpoint_Homo sapiens_R-HSA-8852276	1959-01-01	0.961425	1	0.944665	1	6.64372	-0.261352	PSMA1
283	Formation of the beta-catenin:TCF transactivating complex_Homo sapiens_R-HSA-201722	1958-01-01	0.959234	1	0.941921	1	6.36122	-0.264755	TCF7L2
284	DNA Damage/Telomere Stress Induced Senescence_Homo sapiens_R-HSA-2559586	1959-01-01	0.961425	1	0.944665	1	6.79673	-0.267371	HMGA2
285	Respiratory electron transport_Homo sapiens_R-HSA-611105	1988-02-01	0.953387	1	0.929205	1	5.60973	-0.267778	NUBPL;NDUFAF2
286	G1/S Transition_Homo sapiens_R-HSA-69206	3/112	0.94343	1	0.911792	1	4.72947	-0.275409	PRIM2;PSMA1;MNAT1
287	Chromosome Maintenance_Homo sapiens_R-HSA-73886	1986-02-01	0.948923	1	0.923417	1	5.29003	-0.277346	PRIM2;CENPP
288	CDT1 association with the CDC6:ORC:origin complex_Homo sapiens_R-HSA-68827	1958-01-01	0.959234	1	0.941921	1	6.67407	-0.277776	PSMA1
289	Recruitment and ATM-mediated phosphorylation of repair and signaling proteins at DNA double strand breaks_Homo sapiens_R-HSA-5693565	1958-01-01	0.959234	1	0.941921	1	6.68995	-0.278437	EYA1
290	B-WICH complex positively regulates rRNA expression_Homo sapiens_R-HSA-5250924	1958-01-01	0.959234	1	0.941921	1	6.69331	-0.278577	GSK3B
291	Telomere Maintenance_Homo sapiens_R-HSA-157579	1959-01-01	0.961425	1	0.944665	1	7.12572	-0.280313	PRIM2
292	NIK-->noncanonical NF-kB signaling_Homo sapiens_R-HSA-5676590	1958-01-01	0.959234	1	0.941921	1	6.77033	-0.281782	PSMA1
293	Mitotic G1-G1/S phases_Homo sapiens_R-HSA-453279	4/136	0.937834	1	0.900364	1	4.39173	-0.281871	PRIM2;PSMA1;E2F3;MNAT1
294	APC/C-mediated degradation of cell cycle proteins_Homo sapiens_R-HSA-174143	1985-02-01	0.94654	1	0.920359	1	5.23969	-0.287878	PSMA1;CDC14A
295	Regulation of mitotic cell cycle_Homo sapiens_R-HSA-453276	1985-02-01	0.94654	1	0.920359	1	5.24584	-0.288216	PSMA1;CDC14A
296	Initial triggering of complement_Homo sapiens_R-HSA-166663	1958-01-01	0.959234	1	0.941921	1	7.01446	-0.291943	MASP2
297	Hh mutants abrogate ligand secretion_Homo sapiens_R-HSA-5387390	1957-01-01	0.956918	1	0.939042	1	6.78823	-0.298935	PSMA1
298	Meiotic synapsis_Homo sapiens_R-HSA-1221632	1957-01-01	0.956918	1	0.939042	1	6.96924	-0.306907	SMC1B
299	Metabolism of polyamines_Homo sapiens_R-HSA-351202	1984-02-01	0.944052	1	0.917186	1	5.34403	-0.307675	CKMT2;PSMA1
300	RNA Polymerase I Chain Elongation_Homo sapiens_R-HSA-73777	1957-01-01	0.956918	1	0.939042	1	6.98798	-0.307732	MNAT1
301	Immunoregulatory interactions between a Lymphoid and a non-Lymphoid cell_Homo sapiens_R-HSA-198933	5/157	0.928079	1	0.883495	1	4.17252	-0.311428	CXADR;KLRB1;CDH1;TREML4;CD226
302	Degradation of DVL_Homo sapiens_R-HSA-4641258	1956-01-01	0.954471	1	0.93602	1	6.76349	-0.315165	PSMA1
303	Mitotic Prometaphase_Homo sapiens_R-HSA-68877	3/107	0.930967	1	0.8956	1	4.48384	-0.320735	PPP2R5E;CENPP;HDAC8
304	Global Genome Nucleotide Excision Repair (GG-NER)_Homo sapiens_R-HSA-5696399	1982-02-01	0.938742	1	0.910481	1	5.20136	-0.328801	MNAT1;PIAS1
305	Hh mutants that don't undergo autocatalytic processing are degraded by ERAD_Homo sapiens_R-HSA-5362768	1955-01-01	0.951885	1	0.932848	1	6.82183	-0.336392	PSMA1
306	Fatty acid, triacylglycerol, and ketone body metabolism_Homo sapiens_R-HSA-535734	14/217	0.275482	0.8401	0.197319	0.697534	0.269068	-0.346892	NCOA1;NCOA2;CDK19;ELOVL2;SCD5;ELOVL6;RORA;ELOVL7;MED27;LCLAT1;TIAM2;PCCA;ACSBG1;TBL1X
307	AUF1 (hnRNP D0) binds and destabilizes mRNA_Homo sapiens_R-HSA-450408	1954-01-01	0.949152	1	0.92952	1	6.72476	-0.350939	PSMA1
308	Stabilization of p53_Homo sapiens_R-HSA-69541	1954-01-01	0.949152	1	0.92952	1	6.83481	-0.356682	PSMA1
309	Degradation of AXIN_Homo sapiens_R-HSA-4641257	1954-01-01	0.949152	1	0.92952	1	6.84813	-0.357377	PSMA1
310	SCF-beta-TrCP mediated degradation of Emi1_Homo sapiens_R-HSA-174113	1954-01-01	0.949152	1	0.92952	1	6.85326	-0.357645	PSMA1
311	Regulation of HSF1-mediated heat shock response_Homo sapiens_R-HSA-3371453	1980-02-01	0.932956	1	0.903271	1	5.187	-0.359966	GSK3B;RLN1
312	Formation of TC-NER Pre-Incision Complex_Homo sapiens_R-HSA-6781823	1953-01-01	0.946264	1	0.926027	1	6.51878	-0.360054	MNAT1
313	DNA Replication_Homo sapiens_R-HSA-69306	3/105	0.925308	1	0.888409	1	4.76836	-0.370159	PRIM2;PSMA1;E2F3
314	IRE1alpha activates chaperones_Homo sapiens_R-HSA-381070	1955-01-01	0.951885	1	0.932848	1	7.53799	-0.371706	TPP1
315	Vif-mediated degradation of APOBEC3G_Homo sapiens_R-HSA-180585	1953-01-01	0.946264	1	0.926027	1	6.92761	-0.382635	PSMA1
316	RNA Polymerase I Transcription_Homo sapiens_R-HSA-73864	1979-02-01	0.929872	1	0.899467	1	5.26545	-0.382843	MNAT1;GATAD2B
317	Glucose metabolism_Homo sapiens_R-HSA-70326	1979-02-01	0.929872	1	0.899467	1	5.38165	-0.391292	GYS2;PFKFB1
318	Activation of anterior HOX genes in hindbrain development during early embryogenesis_Homo sapiens_R-HSA-5617472	1989-07-01	0.199877	0.739315	0.164132	0.649146	0.244662	-0.393919	MEIS1;KMT2C;PCGF2;HOXA3;PAX6;PBX1;KDM6A
319	COPI-mediated anterograde transport_Homo sapiens_R-HSA-6807878	1978-02-01	0.926654	1	0.895523	1	5.22549	-0.398051	SPTB;DYNC1I1
320	p53-Independent DNA Damage Response_Homo sapiens_R-HSA-69610	1952-01-01	0.943213	1	0.922362	1	6.89905	-0.403344	PSMA1
321	p53-Independent G1/S DNA damage checkpoint_Homo sapiens_R-HSA-69613	1952-01-01	0.943213	1	0.922362	1	6.90181	-0.403505	PSMA1
322	Ubiquitin Mediated Degradation of Phosphorylated Cdc25A_Homo sapiens_R-HSA-69601	1952-01-01	0.943213	1	0.922362	1	6.90501	-0.403692	PSMA1
323	Activation of HOX genes during differentiation_Homo sapiens_R-HSA-5619507	1989-07-01	0.199877	0.739315	0.164132	0.649146	0.253664	-0.408413	MEIS1;KMT2C;PCGF2;HOXA3;PAX6;PBX1;KDM6A
324	Class I MHC mediated antigen processing & presentation_Homo sapiens_R-HSA-983169	12/305	0.897574	1	0.818173	1	3.8748	-0.41871	ZNRF1;PSMA1;FBXW8;UBE3D;SMURF1;UBE2E3;ZBTB16;SIAH1;NEDD4L;UBE2E2;CBLB;SH3RF1
325	XBP1(S) activates chaperone genes_Homo sapiens_R-HSA-381038	1953-01-01	0.946264	1	0.926027	1	7.59858	-0.419695	TPP1
326	Deposition of new CENPA-containing nucleosomes at the centromere_Homo sapiens_R-HSA-606279	1952-01-01	0.943213	1	0.922362	1	7.21377	-0.421743	CENPP
327	Nucleosome assembly_Homo sapiens_R-HSA-774815	1952-01-01	0.943213	1	0.922362	1	7.2319	-0.422803	CENPP
328	Vpu mediated degradation of CD4_Homo sapiens_R-HSA-180534	1951-01-01	0.939988	1	0.918515	1	6.91348	-0.427865	PSMA1
329	Class A/1 (Rhodopsin-like receptors)_Homo sapiens_R-HSA-373076	13/323	0.888581	1	0.802603	1	3.64217	-0.430246	CHRM2;GPR39;CHRM3;HTR1F;PTGER3;RRH;TACR1;HTR2A;RXFP2;TSHR;AGTR1;GNRH2;GNRHR
330	Autodegradation of the E3 ubiquitin ligase COP1_Homo sapiens_R-HSA-349425	1951-01-01	0.939988	1	0.918515	1	6.95958	-0.430718	PSMA1
331	Resolution of Sister Chromatid Cohesion_Homo sapiens_R-HSA-2500257	1999-03-01	0.905691	1	0.864116	1	4.45432	-0.441234	PPP2R5E;CENPP;HDAC8
332	RNA Polymerase I Promoter Clearance_Homo sapiens_R-HSA-73854	1976-02-01	0.919796	1	0.887201	1	5.29729	-0.442869	MNAT1;GATAD2B
333	Ubiquitin-dependent degradation of Cyclin D1_Homo sapiens_R-HSA-69229	1950-01-01	0.93658	1	0.914478	1	6.83341	-0.447729	PSMA1
334	Ubiquitin-dependent degradation of Cyclin D_Homo sapiens_R-HSA-75815	1950-01-01	0.93658	1	0.914478	1	6.85519	-0.449156	PSMA1
335	Aquaporin-mediated transport_Homo sapiens_R-HSA-445717	1951-01-01	0.939988	1	0.918515	1	7.44617	-0.460833	PRKAR2B
336	Regulation of Apoptosis_Homo sapiens_R-HSA-169911	1950-01-01	0.93658	1	0.914478	1	7.039	-0.461199	PSMA1
337	CDK-mediated phosphorylation and removal of Cdc6_Homo sapiens_R-HSA-69017	1950-01-01	0.93658	1	0.914478	1	7.09047	-0.464571	PSMA1
338	Regulation of ornithine decarboxylase (ODC)_Homo sapiens_R-HSA-350562	1950-01-01	0.93658	1	0.914478	1	7.3104	-0.478981	PSMA1
339	Regulation of DNA replication_Homo sapiens_R-HSA-69304	1975-02-01	0.916145	1	0.882814	1	5.56489	-0.487375	PSMA1;E2F3
340	Binding and Uptake of Ligands by Scavenger Receptors_Homo sapiens_R-HSA-2173782	1974-02-01	0.912338	1	0.878269	1	5.31981	-0.488063	LRP1;STAB2
341	Regulation of activated PAK-2p34 by proteasome mediated degradation_Homo sapiens_R-HSA-211733	1949-01-01	0.932979	1	0.910242	1	7.06213	-0.489921	PSMA1
342	Positive epigenetic regulation of rRNA expression_Homo sapiens_R-HSA-5250913	1973-02-01	0.90837	1	0.873563	1	5.12851	-0.492869	GSK3B;GATAD2B
343	Cross-presentation of soluble exogenous antigens (endosomes)_Homo sapiens_R-HSA-1236978	1949-01-01	0.932979	1	0.910242	1	7.1236	-0.494185	PSMA1
344	Signaling by TGF-beta Receptor Complex_Homo sapiens_R-HSA-170834	1973-02-01	0.90837	1	0.873563	1	5.14909	-0.494846	SMURF1;NEDD4L
345	Cell-Cell communication_Homo sapiens_R-HSA-1500931	9/131	0.269669	0.8401	0.211546	0.733458	0.384432	-0.503821	CADM2;CDH1;ITGB4;MAGI2;CLDN18;PIK3CB;RSU1;MPP5;PTK2
346	Cellular response to heat stress_Homo sapiens_R-HSA-3371556	1996-03-01	0.894225	1	0.850311	1	4.52722	-0.506136	GSK3B;CAMK2D;RLN1
347	Creation of C4 and C2 activators_Homo sapiens_R-HSA-166786	1949-01-01	0.932979	1	0.910242	1	7.51968	-0.521663	MASP2
348	RNA Polymerase I, RNA Polymerase III, and Mitochondrial Transcription_Homo sapiens_R-HSA-504046	4/116	0.874901	1	0.82146	1	3.93035	-0.52527	NFIA;NFIB;MNAT1;GATAD2B
349	TNFR2 non-canonical NF-kB pathway_Homo sapiens_R-HSA-5668541	1995-03-01	0.890133	1	0.845445	1	4.56129	-0.530863	EDAR;EDA;PSMA1
350	Pyruvate metabolism and Citric Acid (TCA) cycle_Homo sapiens_R-HSA-71406	1948-01-01	0.929173	1	0.905796	1	7.39908	-0.543537	LDHC
351	Epigenetic regulation of gene expression_Homo sapiens_R-HSA-212165	4/115	0.870642	1	0.816423	1	3.96799	-0.549665	GSK3B;MNAT1;JARID2;GATAD2B
352	Hexose transport_Homo sapiens_R-HSA-189200	1948-01-01	0.929173	1	0.905796	1	7.4873	-0.550018	SLC5A9
353	Nucleotide-binding domain, leucine rich repeat containing receptor (NLR) signaling pathways_Homo sapiens_R-HSA-168643	1947-01-01	0.925152	1	0.901131	1	7.35557	-0.572244	AIM2
354	Cyclin A:Cdk2-associated events at S phase entry_Homo sapiens_R-HSA-69656	1969-02-01	0.890755	1	0.853018	1	5.12403	-0.592779	PSMA1;MNAT1
355	Oxidative Stress Induced Senescence_Homo sapiens_R-HSA-2559580	1991-03-01	0.872315	1	0.824591	1	4.39325	-0.600137	SCMH1;E2F3;TNIK
356	Cyclin E associated events during G1/S transition_Homo sapiens_R-HSA-69202	1968-02-01	0.885884	1	0.847427	1	5.07685	-0.61516	PSMA1;MNAT1
357	Defensins_Homo sapiens_R-HSA-1461973	1947-01-01	0.925152	1	0.901131	1	7.97562	-0.620482	PRSS3
358	Neurotransmitter Release Cycle_Homo sapiens_R-HSA-112310	1951-05-01	0.136507	0.657156	0.121304	0.587111	0.312973	-0.623247	STXBP1;GAD1;SLC6A13;ABAT;APBA1
359	Amyloid fiber formation_Homo sapiens_R-HSA-977225	1968-02-01	0.885884	1	0.847427	1	5.1687	-0.62629	SIAH1;SNCA
360	Scavenging of heme from plasma_Homo sapiens_R-HSA-2168880	1946-01-01	0.920902	1	0.896235	1	7.61824	-0.627751	LRP1
361	Transcriptional activity of SMAD2/SMAD3:SMAD4 heterotrimer_Homo sapiens_R-HSA-2173793	1944-01-01	0.911667	1	0.885706	1	7.12208	-0.658654	NEDD4L
362	Transcription of the HIV genome_Homo sapiens_R-HSA-167172	1967-02-01	0.880812	1	0.841644	1	5.39341	-0.684486	MNAT1;TAF3
363	Immune System_Homo sapiens_R-HSA-168256	75/1547	0.838774	1	0.579343	0.915474	3.89357	-0.684544	NCKAP1;GSK3B;EDA;UBE3D;PROS1;RASGRF2;IL24;WIPF3;CBLB;PIK3CB;FGF2;SH3RF1;RPS6KA5;PPP2R5E;CDH1;PIP4K2A;PRSS3;PRKG1;CXADR;FBXW8;KSR1;PRKCE;UBE2E3;GAB1;UBE2E2;NRG1;NRG2;GAB2;SPTB;MID1;PIAS1;EDAR;DNM3;ENAH;AIM2;PSMA1;STIM1;RASA1;ELMO1;CD226;MASP2;SOS1;TRIM10;RAPGEF4;CAMK2D;PHLPP1;PDE1C;KLRB1;TXK;PDE1A;NEDD4L;RASAL2;FOXO3;FOXO1;ZNRF1;RAP1A;PRKAR2B;C9;PIP5K1B;NCAM1;DYNC1I1;ANGPT1;EGF;SMURF1;ZBTB16;SIAH1…
364	Assembly of the pre-replicative complex_Homo sapiens_R-HSA-68867	1967-02-01	0.880812	1	0.841644	1	5.40498	-0.685955	PSMA1;E2F3
365	RNA Polymerase II Transcription Elongation_Homo sapiens_R-HSA-75955	1944-01-01	0.911667	1	0.885706	1	7.56032	-0.699182	MNAT1
366	Formation of RNA Pol II elongation complex_Homo sapiens_R-HSA-112382	1944-01-01	0.911667	1	0.885706	1	7.56448	-0.699567	MNAT1
367	Formation of HIV elongation complex in the absence of HIV Tat_Homo sapiens_R-HSA-167152	1944-01-01	0.911667	1	0.885706	1	7.57989	-0.700992	MNAT1
368	ERCC6 (CSB) and EHMT2 (G9a) positively regulate rRNA expression_Homo sapiens_R-HSA-427389	1943-01-01	0.906653	1	0.880048	1	7.19916	-0.705487	GATAD2B
369	HDR through Homologous Recombination (HRR)_Homo sapiens_R-HSA-5685942	1964-02-01	0.86432	1	0.823085	1	4.97639	-0.725617	RAD51B;SPIDR
370	TP53 Regulates Transcription of Cell Death Genes_Homo sapiens_R-HSA-5633008	1943-01-01	0.906653	1	0.880048	1	7.52466	-0.737384	CRADD
371	Degradation of the extracellular matrix_Homo sapiens_R-HSA-1474228	4/106	0.826409	1	0.765719	1	3.90079	-0.743745	CAPN13;MMP16;CDH1;COL23A1
372	Disease_Homo sapiens_R-HSA-1643685	42/725	0.322058	0.904784	0.163575	0.649146	0.658454	-0.746045	HDAC4;NOTCH3;SPON2;GSK3B;SPON1;CTBP2;NEDD4L;PIK3CB;FOXO3;HDAC8;FGF2;FOXO1;LRP6;GYS2;ADAMTS3;PPP2R5E;ADAMTS17;GPC5;TBL1X;GPC6;ADAMTS6;SBSPON;RNF43;TCF7L2;EGF;GIF;SFTPD;GAB1;NRG1;NRG2;GAB2;MSRA;PSMA1;PCCA;PACS1;RBP1;ELMO1;MAML3;MNAT1;SOS1;MAMLD1;TAF3
373	Intrinsic Pathway for Apoptosis_Homo sapiens_R-HSA-109606	1942-01-01	0.901354	1	0.874111	1	7.18508	-0.74622	SFN
374	Activation of Kainate Receptors upon glutamate binding_Homo sapiens_R-HSA-451326	2018-04-30	0.0743829	0.478247	0.0732492	0.449884	0.287836	-0.747949	GRIK4;GRIK1;PLCB1;NCALD
375	Formation of HIV-1 elongation complex containing HIV-1 Tat_Homo sapiens_R-HSA-167200	1943-01-01	0.906653	1	0.880048	1	7.66563	-0.751199	MNAT1
376	HIV Transcription Elongation_Homo sapiens_R-HSA-167169	1943-01-01	0.906653	1	0.880048	1	7.69381	-0.75396	MNAT1
377	Tat-mediated elongation of the HIV-1 transcript_Homo sapiens_R-HSA-167246	1943-01-01	0.906653	1	0.880048	1	7.7126	-0.755802	MNAT1
378	Disassembly of the destruction complex and recruitment of AXIN to the membrane_Homo sapiens_R-HSA-4641262	1931-04-01	0.081948	0.50004	0.0797816	0.474725	0.305209	-0.763531	GSK3B;PPP2R5E;WNT8B;LRP6
379	Hedgehog ligand biogenesis_Homo sapiens_R-HSA-5358346	1964-02-01	0.86432	1	0.823085	1	5.34146	-0.77885	PSMA1;GPC5
380	RNA Polymerase II Pre-transcription Events_Homo sapiens_R-HSA-674695	1964-02-01	0.86432	1	0.823085	1	5.4709	-0.797723	MNAT1;TAF3
381	Inactivation of Cdc42 and Rac_Homo sapiens_R-HSA-428543	2018-03-09	0.01011	0.220123	0.0164657	0.222122	0.174156	-0.800111	ARHGAP39;SRGAP3;SRGAP1
382	Homologous DNA Pairing and Strand Exchange_Homo sapiens_R-HSA-5693579	1942-01-01	0.901354	1	0.874111	1	7.73469	-0.803301	RAD51B
383	Vasopressin regulates renal water homeostasis via Aquaporins_Homo sapiens_R-HSA-432040	1943-01-01	0.906653	1	0.880048	1	8.25236	-0.808696	PRKAR2B
384	Iron uptake and transport_Homo sapiens_R-HSA-917937	1943-01-01	0.906653	1	0.880048	1	8.3585	-0.819097	CP
385	Visual phototransduction_Homo sapiens_R-HSA-2187338	1997-07-01	0.263736	0.8401	0.215994	0.741658	0.614821	-0.819439	RBP2;LRP1;RBP1;AKR1C3;GPC5;GPC6;CAMKMT
386	tRNA Aminoacylation_Homo sapiens_R-HSA-379724	1942-01-01	0.901354	1	0.874111	1	7.93631	-0.824241	FARS2
387	Innate Immune System_Homo sapiens_R-HSA-168249	46/807	0.35306	0.913117	0.176355	0.662887	0.793467	-0.826093	GSK3B;NCKAP1;CAMK2D;PHLPP1;PDE1C;RASGRF2;PROS1;PDE1A;TXK;WIPF3;PIK3CB;RASAL2;FOXO3;FGF2;FOXO1;RAP1A;RPS6KA5;PRKAR2B;PPP2R5E;C9;PIP4K2A;PIP5K1B;NCAM1;PRSS3;KSR1;ANGPT1;EGF;PRKCE;GAB1;NFATC2;NRG1;BRAF;NRG2;GAB2;GRIN2C;SPTB;PTK2;DNM3;TEC;AIM2;PSMA1;RASA1;ELMO1;MASP2;TEK;SOS1
388	Integrin alphaIIb beta3 signaling_Homo sapiens_R-HSA-354192	2018-04-27	0.0539489	0.375464	0.0553798	0.376268	0.284041	-0.829321	RAP1A;SOS1;PTK2;RAPGEF4
389	Cooperation of PDCL (PhLP1) and TRiC/CCT in G-protein beta folding_Homo sapiens_R-HSA-6814122	1942-01-01	0.901354	1	0.874111	1	8.01001	-0.831895	RGS6
390	Signaling by Retinoic Acid_Homo sapiens_R-HSA-5362517	1942-01-01	0.901354	1	0.874111	1	8.24799	-0.856611	AKR1C3
391	SUMOylation_Homo sapiens_R-HSA-2990846	4/101	0.796817	1	0.733153	1	3.7844	-0.859549	PCGF2;SCMH1;NSMCE2;PIAS1
392	Cell surface interactions at the vascular wall_Homo sapiens_R-HSA-202733	7/101	0.297593	0.882644	0.243919	0.787367	0.717529	-0.869666	CXADR;ANGPT1;PROS1;TEK;PIK3CB;GP6;SOS1
393	DNA Replication Pre-Initiation_Homo sapiens_R-HSA-69002	1982-03-01	0.822657	1	0.768822	1	4.49806	-0.878095	PRIM2;PSMA1;E2F3
394	Histidine, lysine, phenylalanine, tyrosine, proline and tryptophan catabolism_Homo sapiens_R-HSA-6788656	1941-01-01	0.895755	1	0.867881	1	7.99244	-0.879872	SLC25A21
395	M/G1 Transition_Homo sapiens_R-HSA-68874	1982-03-01	0.822657	1	0.768822	1	4.51566	-0.881531	PRIM2;PSMA1;E2F3
396	Constitutive Signaling by NOTCH1 HD+PEST Domain Mutants_Homo sapiens_R-HSA-2894862	1957-05-01	0.189292	0.71299	0.164998	0.649146	0.532069	-0.885611	HDAC4;MAML3;TBL1X;HDAC8;MAMLD1
397	Constitutive Signaling by NOTCH1 PEST Domain Mutants_Homo sapiens_R-HSA-2644606	1957-05-01	0.189292	0.71299	0.164998	0.649146	0.544878	-0.906931	HDAC4;MAML3;TBL1X;HDAC8;MAMLD1
398	Opioid Signalling_Homo sapiens_R-HSA-111885	1981-06-01	0.266905	0.8401	0.223876	0.754726	0.692225	-0.914334	PLCB4;PDE1C;PRKAR2B;PDE4D;PDE1A;PLCB1
399	Metabolism of lipids and lipoproteins_Homo sapiens_R-HSA-556833	32/659	0.744979	1	0.560422	0.911518	3.11418	-0.916815	PI4K2B;SGMS1;PPM1L;PITPNB;CYP4A22;GDPD1;RORA;TPTE;PIK3CB;LCLAT1;MTMR7;SPTLC3;PIP4K2A;PDSS2;PIP5K1B;TBL1X;NCOA1;NCOA2;ABCG8;CDK19;ELOVL2;EPHX2;SCD5;AKR1C3;ELOVL6;ELOVL7;MED27;CYP7B1;TIAM2;INPP4B;PCCA;ACSBG1
400	COPI-dependent Golgi-to-ER retrograde traffic_Homo sapiens_R-HSA-6811434	1981-03-01	0.816228	1	0.761811	1	4.56505	-0.926988	KIF26B;KIF21A;KIF6
401	PRC2 methylates histones and DNA_Homo sapiens_R-HSA-212300	1940-01-01	0.889839	1	0.861343	1	7.94933	-0.927806	JARID2
402	Signaling by NOTCH1 HD+PEST Domain Mutants in Cancer_Homo sapiens_R-HSA-2894858	1957-05-01	0.189292	0.71299	0.164998	0.649146	0.558052	-0.928859	HDAC4;MAML3;TBL1X;HDAC8;MAMLD1
403	Phospholipid metabolism_Homo sapiens_R-HSA-1483257	10/161	0.362298	0.914075	0.282673	0.832429	0.932967	-0.94723	PI4K2B;INPP4B;PITPNB;GDPD1;PIP4K2A;TPTE;PIP5K1B;PIK3CB;LCLAT1;MTMR7
404	Signaling by NOTCH1 in Cancer_Homo sapiens_R-HSA-2644603	1957-05-01	0.189292	0.71299	0.164998	0.649146	0.569359	-0.947679	HDAC4;MAML3;TBL1X;HDAC8;MAMLD1
405	RORA activates gene expression_Homo sapiens_R-HSA-1368082	2018-04-27	0.0539489	0.375464	0.0553798	0.376268	0.324683	-0.947982	NCOA1;NCOA2;RORA;TBL1X
406	Signaling by NOTCH1 PEST Domain Mutants in Cancer_Homo sapiens_R-HSA-2644602	1957-05-01	0.189292	0.71299	0.164998	0.649146	0.576523	-0.959603	HDAC4;MAML3;TBL1X;HDAC8;MAMLD1
407	Complement cascade_Homo sapiens_R-HSA-166658	1980-03-01	0.809602	1	0.75463	1	4.56028	-0.963191	PROS1;C9;MASP2
408	Antigen processing: Ubiquitination & Proteasome degradation_Homo sapiens_R-HSA-983168	12/260	0.743091	1	0.63023	0.959654	3.24742	-0.964277	ZNRF1;PSMA1;FBXW8;UBE3D;SMURF1;UBE2E3;ZBTB16;SIAH1;NEDD4L;UBE2E2;CBLB;SH3RF1
409	GLI3 is processed to GLI3R by the proteasome_Homo sapiens_R-HSA-5610785	1959-02-01	0.832132	1	0.787798	1	5.25256	-0.965231	GSK3B;PSMA1
410	Transcriptional regulation of white adipocyte differentiation_Homo sapiens_R-HSA-381340	1979-06-01	0.248662	0.820092	0.208759	0.729896	0.71008	-0.988191	NCOA1;NCOA2;CDK19;EBF1;TBL1X;MED27
411	Role of phospholipids in phagocytosis_Homo sapiens_R-HSA-2029485	1960-02-01	0.839076	1	0.795317	1	5.66522	-0.993983	PRKCE;PIK3CB
412	Beta-catenin independent WNT signaling_Homo sapiens_R-HSA-3858494	9/144	0.366909	0.914075	0.291382	0.838886	0.993004	-0.995627	TCF7L2;FZD3;WNT5B;PSMA1;DAAM1;SMURF1;NLK;PLCB1;PRKG1
413	PI3K Cascade_Homo sapiens_R-HSA-109704	1979-03-01	0.802775	1	0.747276	1	4.53356	-0.995937	GAB1;PIK3CB;FGF2
414	Presynaptic phase of homologous DNA pairing and strand exchange_Homo sapiens_R-HSA-5693616	1939-01-01	0.883587	1	0.854482	1	8.05297	-0.996682	RAD51B
415	Synthesis of bile acids and bile salts_Homo sapiens_R-HSA-192105	2018-04-27	0.0539489	0.375464	0.0553798	0.376268	0.343394	-1.00261	NCOA1;NCOA2;AKR1C3;CYP7B1
416	Translocation of GLUT4 to the plasma membrane_Homo sapiens_R-HSA-1445148	1960-02-01	0.839076	1	0.795317	1	5.8923	-1.03382	EXOC4;SFN
417	Regulation of actin dynamics for phagocytic cup formation_Homo sapiens_R-HSA-2029482	1997-04-01	0.770321	1	0.704743	0.998733	3.98687	-1.04037	NCKAP1;WIPF3;ELMO1;PTK2
418	Vesicle-mediated transport_Homo sapiens_R-HSA-5653656	24/492	0.713161	1	0.550385	0.910343	3.08027	-1.04128	TPD52;SEC16B;LRP1;STAB2;DTNBP1;TRAPPC9;TPD52L1;SPTB;BICD1;KIF6;RAB30;DNAJC6;KIF26B;MYO6;VTI1A;EXOC4;MAN1C1;GJB7;SFN;KIF21A;CNIH3;SEC22A;RAB6B;DYNC1I1
419	SUMO E3 ligases SUMOylate target proteins_Homo sapiens_R-HSA-3108232	1996-04-01	0.763288	1	0.697309	0.993355	3.87234	-1.04599	PCGF2;NSMCE2;SCMH1;PIAS1
420	Platelet calcium homeostasis_Homo sapiens_R-HSA-418360	2018-04-27	0.0539489	0.375464	0.0553798	0.376268	0.359795	-1.0505	SLC8A3;TRPC6;STIM1;P2RX3
421	RHO GTPases Activate Formins_Homo sapiens_R-HSA-5663220	5/114	0.737708	1	0.663151	0.970373	3.49298	-1.06259	DIAPH1;DAAM1;PPP2R5E;CENPP;SCAI
422	Ca2+ pathway_Homo sapiens_R-HSA-4086398	1961-05-01	0.227922	0.803755	0.197121	0.697534	0.72079	-1.06587	TCF7L2;FZD3;PLCB1;NLK;PRKG1
423	EPH-Ephrin signaling_Homo sapiens_R-HSA-2682334	1995-04-01	0.75609	1	0.689743	0.987704	3.81314	-1.06614	RASA1;MYL9;KALRN;PTK2
424	tRNA modification in the nucleus and cytosol_Homo sapiens_R-HSA-6782315	1939-01-01	0.883587	1	0.854482	1	8.78275	-1.087	CDKAL1
425	Collagen degradation_Homo sapiens_R-HSA-1442490	1939-01-01	0.883587	1	0.854482	1	8.79044	-1.08795	COL23A1
426	Signaling by FGFR1 in disease_Homo sapiens_R-HSA-5655302	1938-04-01	0.14441	0.684874	0.132905	0.624132	0.563401	-1.09024	GAB1;GAB2;SOS1;FGF2
427	ER to Golgi Anterograde Transport_Homo sapiens_R-HSA-199977	6/131	0.709955	1	0.627575	0.959654	3.19505	-1.09448	SEC16B;TRAPPC9;CNIH3;SPTB;SEC22A;DYNC1I1
428	MAPK6/MAPK4 signaling_Homo sapiens_R-HSA-5687128	1992-06-01	0.371536	0.914075	0.312243	0.842639	1.14058	-1.12929	PSMA1;FOXO3;KALRN;FOXO1;CDC14A;CDC14B
429	Extracellular matrix organization_Homo sapiens_R-HSA-1474244	16/283	0.449738	0.920633	0.330287	0.842639	1.41572	-1.13129	TGFB2;COL24A1;MUSK;LAMA2;ITGB4;COL23A1;TNC;LTBP1;FGF2;CAPN13;ADAMTS3;MMP16;CDH1;ITGB8;COL6A6;NCAM1
430	Adaptive Immune System_Homo sapiens_R-HSA-1280218	38/762	0.70274	1	0.495209	0.876397	3.22385	-1.13727	GSK3B;PHLPP1;KLRB1;UBE3D;NEDD4L;CBLB;PIK3CB;FOXO3;FGF2;FOXO1;SH3RF1;ZNRF1;RAP1A;CDH1;PPP2R5E;PIP4K2A;PIP5K1B;PRKG1;DYNC1I1;CXADR;FBXW8;EGF;SMURF1;ZBTB16;UBE2E3;SIAH1;GAB1;UBE2E2;NRG1;NRG2;ENAH;DNM3;PSMA1;STIM1;TREML4;CD226;SOS1;RAPGEF4
431	GPCR downstream signaling_Homo sapiens_R-HSA-388396	54/983	0.445511	0.920633	0.224315	0.754726	1.40957	-1.13968	TAS2R60;DGKG;CHRM2;CHRM3;OR5K4;RASGRF2;RRH;PIK3CB;HTR2A;RXFP2;GRM3;RGS5;GPR176;GNRHR;OR13D1;PDE8A;RGS6;TRPC6;PRKCE;PDE4D;OR2L5;PTH2R;GAB2;TACR1;OR10Z1;TIAM2;PLCB4;AGTR1;OR10A2;PLCB1;SOS1;RGS17;TAS2R41;CALCB;TAS2R42;PDE1A;PTGER3;KALRN;CRHR2;GNA14;GRK5;OR2AG1;GNA12;RGS20;GABBR1;OR5H2;HTR1F;OR1L6;TSHR;GNAQ;GNRH2;PDE3A;OR2A7;OR6A2
432	ECM proteoglycans_Homo sapiens_R-HSA-3000178	1955-05-01	0.170935	0.708898	0.149789	0.649146	0.647165	-1.1432	TGFB2;MUSK;LAMA2;TNC;NCAM1
433	Transport of vitamins, nucleosides, and related molecules_Homo sapiens_R-HSA-425397	1938-01-01	0.87698	1	0.847283	1	8.79642	-1.15471	SLCO3A1
434	Cell junction organization_Homo sapiens_R-HSA-446728	1986-06-01	0.313798	0.901698	0.263104	0.805284	1.00407	-1.16372	CADM2;CDH1;ITGB4;CLDN18;RSU1;MPP5
435	PPARA activates gene expression_Homo sapiens_R-HSA-1989781	7/113	0.403035	0.914075	0.333183	0.842639	1.28476	-1.1675	NCOA1;TIAM2;NCOA2;CDK19;RORA;TBL1X;MED27
436	Response to elevated platelet cytosolic Ca2+_Homo sapiens_R-HSA-76005	5/110	0.708736	1	0.633258	0.959654	3.40408	-1.17193	TGFB2;EGF;PROS1;VEGFC;PHACTR2
437	O-linked glycosylation_Homo sapiens_R-HSA-5173105	7/110	0.376418	0.914075	0.310291	0.842639	1.21124	-1.18345	SBSPON;SPON2;SPON1;ADAMTS3;ADAMTS17;B4GALT6;ADAMTS6
438	Phase 1 - Functionalization of compounds_Homo sapiens_R-HSA-211945	1992-04-01	0.733481	1	0.666248	0.970373	3.81928	-1.1838	NCOA1;NCOA2;CYP4A22;CYP7B1
439	GPCR ligand binding_Homo sapiens_R-HSA-500792	23/447	0.611093	0.986554	0.449255	0.863327	2.43469	-1.1991	CHRM2;TAS2R60;GPR39;CHRM3;FZD3;GABBR1;TAS2R41;CALCB;TAS2R42;HTR1F;PTGER3;WNT8B;RRH;PTH2R;TACR1;HTR2A;RXFP2;TSHR;CRHR2;GRM3;AGTR1;GNRH2;GNRHR
440	Signaling by Hedgehog_Homo sapiens_R-HSA-5358351	8/136	0.445637	0.920633	0.364382	0.842639	1.49328	-1.20694	ADCY10;GSK3B;PSMA1;PRKAR2B;SMURF1;HHIP;GPC5;GLI2
441	Cytokine Signaling in Immune system_Homo sapiens_R-HSA-1280215	31/620	0.68278	1	0.494741	0.876397	3.17253	-1.21058	CAMK2D;EDA;RASGRF2;IL24;RASAL2;PIK3CB;FGF2;RAP1A;PPP2R5E;NCAM1;ANGPT1;KSR1;EGF;BRAF;NRG1;NRG2;GAB2;GRIN2C;SPTB;MID1;PTK2;PIAS1;EDAR;TEC;PSMA1;IL7;RASA1;TEK;SOS1;EIF4G3;TRIM10
442	Post-translational protein modification_Homo sapiens_R-HSA-597592	27/521	0.600644	0.985824	0.425452	0.861163	2.40787	-1.22742	SPON2;SPON1;PROS1;FUT8;ADAMTS3;GMDS;SCMH1;ADAMTS17;MAN1C1;ST8SIA5;ADAMTS6;DYNC1I1;FN3K;SBSPON;SEC16B;ST6GAL2;ST8SIA1;PCGF2;NSMCE2;ALG13;TRAPPC9;SPTB;PIAS1;PIGC;B4GALT6;CNIH3;SEC22A
443	G alpha (i) signalling events_Homo sapiens_R-HSA-418594	12/240	0.639397	1	0.522467	0.885882	2.75981	-1.23427	TAS2R60;CHRM2;GRM3;RGS5;GABBR1;TAS2R41;TAS2R42;HTR1F;PTGER3;RRH;RGS20;RGS6
444	Sphingolipid metabolism_Homo sapiens_R-HSA-428157	1974-03-01	0.765502	1	0.707849	1	4.71153	-1.25903	SGMS1;PPM1L;SPTLC3
445	Asparagine N-linked glycosylation_Homo sapiens_R-HSA-446203	14/259	0.526236	0.943418	0.405871	0.851184	1.99012	-1.27767	SEC16B;ST6GAL2;ST8SIA1;ALG13;TRAPPC9;SPTB;FUT8;GMDS;MAN1C1;ST8SIA5;B4GALT6;CNIH3;SEC22A;DYNC1I1
446	Intra-Golgi and retrograde Golgi-to-ER traffic_Homo sapiens_R-HSA-6811442	9/179	0.625928	0.991381	0.524949	0.888517	2.7578	-1.29209	RAB30;KIF26B;VTI1A;MAN1C1;KIF21A;KIF6;BICD1;RAB6B;DYNC1I1
447	RHO GTPase Effectors_Homo sapiens_R-HSA-195258	14/255	0.502416	0.943418	0.384493	0.842639	1.88738	-1.29913	NCOA2;NCKAP1;WIPF3;PTK2;MYLK;AR;DIAPH1;DAAM1;CDH1;PPP2R5E;SFN;CENPP;MYL9;SCAI
448	Platelet degranulation_Homo sapiens_R-HSA-114608	5/105	0.669466	1	0.593708	0.931998	3.2643	-1.30988	TGFB2;EGF;PROS1;VEGFC;PHACTR2
449	Membrane Trafficking_Homo sapiens_R-HSA-199991	22/420	0.575923	0.968529	0.419474	0.858666	2.39165	-1.31967	TPD52;SEC16B;DTNBP1;TRAPPC9;TPD52L1;SPTB;BICD1;KIF6;RAB30;DNAJC6;KIF26B;MYO6;VTI1A;EXOC4;MAN1C1;GJB7;SFN;KIF21A;CNIH3;SEC22A;RAB6B;DYNC1I1
450	Signaling by NOTCH_Homo sapiens_R-HSA-157118	7/122	0.482205	0.932562	0.402901	0.851184	1.81284	-1.32226	HDAC4;NOTCH3;E2F3;MAML3;TBL1X;HDAC8;MAMLD1
451	Bile acid and bile salt metabolism_Homo sapiens_R-HSA-194068	1935-04-01	0.115726	0.599271	0.10863	0.542019	0.613362	-1.32273	NCOA1;NCOA2;AKR1C3;CYP7B1
452	Regulation of lipid metabolism by Peroxisome proliferator-activated receptor alpha (PPARalpha)_Homo sapiens_R-HSA-400206	7/116	0.429615	0.918686	0.356307	0.842639	1.5675	-1.32433	NCOA1;TIAM2;NCOA2;CDK19;RORA;TBL1X;MED27
453	Hedgehog 'on' state_Homo sapiens_R-HSA-5632684	1985-04-01	0.674708	1	0.606865	0.937705	3.39304	-1.33508	PSMA1;SMURF1;HHIP;GLI2
454	Fcgamma receptor (FCGR) dependent phagocytosis_Homo sapiens_R-HSA-2029480	6/120	0.627468	0.991381	0.54518	0.903603	2.8896	-1.34673	NCKAP1;PRKCE;WIPF3;ELMO1;PIK3CB;PTK2
455	Transport to the Golgi and subsequent modification_Homo sapiens_R-HSA-948021	9/162	0.50485	0.943418	0.411376	0.851184	1.9799	-1.35325	SEC16B;FUT8;MAN1C1;TRAPPC9;B4GALT6;CNIH3;SPTB;SEC22A;DYNC1I1
456	Hedgehog 'off' state_Homo sapiens_R-HSA-5610787	1999-05-01	0.617967	0.991381	0.543307	0.902059	2.85381	-1.37359	ADCY10;GSK3B;PSMA1;PRKAR2B;GLI2
457	PLC-gamma1 signalling_Homo sapiens_R-HSA-167021	1934-04-01	0.106776	0.574673	0.101025	0.531349	0.616556	-1.37925	PDE1C;PRKAR2B;PRKCE;PDE1A
458	DAG and IP3 signaling_Homo sapiens_R-HSA-1489509	1932-04-01	0.0898757	0.520227	0.0865928	0.496742	0.577492	-1.39137	PDE1C;PRKAR2B;PRKCE;PDE1A
459	Generation of second messenger molecules_Homo sapiens_R-HSA-202433	1935-01-01	0.854828	1	0.823482	1	8.95249	-1.40424	ENAH
460	Lysosome Vesicle Biogenesis_Homo sapiens_R-HSA-432720	1935-01-01	0.854828	1	0.823482	1	8.99217	-1.41047	DNAJC6
461	Signaling by NOTCH1_Homo sapiens_R-HSA-1980143	1972-05-01	0.342791	0.913117	0.294223	0.838886	1.32374	-1.41724	HDAC4;MAML3;TBL1X;HDAC8;MAMLD1
462	TCF dependent signaling in response to WNT_Homo sapiens_R-HSA-201681	11/199	0.502375	0.943418	0.39856	0.851184	2.07003	-1.42503	RNF43;GSK3B;TCF7L2;ZNRF3;PSMA1;PPP2R5E;WNT8B;PIP5K1B;SOX6;LGR6;LRP6
463	p75 NTR receptor-mediated signalling_Homo sapiens_R-HSA-193704	1983-04-01	0.65636	1	0.588767	0.927695	3.50879	-1.47736	TIAM2;RASGRF2;SOS1;KALRN
464	Regulation of RAS by GAPs_Homo sapiens_R-HSA-5658442	1967-03-01	0.703941	1	0.645005	0.960588	4.28628	-1.50475	PSMA1;RASA1;RASAL2
465	FGFR2 mutant receptor activation_Homo sapiens_R-HSA-1839126	1933-01-01	0.837888	1	0.805593	1	8.56683	-1.51523	FGF2
466	Oncogene Induced Senescence_Homo sapiens_R-HSA-2559585	1932-01-01	0.828691	1	0.795981	1	8.1465	-1.53079	E2F3
467	HATs acetylate histones_Homo sapiens_R-HSA-3214847	6/107	0.514608	0.943418	0.438921	0.861163	2.30559	-1.53172	NCOA1;NCOA2;KANSL1;KAT6B;ELP4;SUPT3H
468	Cargo concentration in the ER_Homo sapiens_R-HSA-5694530	1933-01-01	0.837888	1	0.805593	1	8.74539	-1.54681	CNIH3
469	The phototransduction cascade_Homo sapiens_R-HSA-2514856	1934-01-01	0.846591	1	0.814753	1	9.46269	-1.57589	CAMKMT
470	G alpha (12/13) signalling events_Homo sapiens_R-HSA-416482	1975-05-01	0.375117	0.914075	0.322119	0.842639	1.60963	-1.57827	TIAM2;RASGRF2;GNA12;SOS1;KALRN
471	Golgi-to-ER retrograde transport_Homo sapiens_R-HSA-8856688	6/110	0.541905	0.948336	0.464038	0.863327	2.59172	-1.58785	KIF26B;KIF21A;KIF6;BICD1;RAB6B;DYNC1I1
472	Purine metabolism_Homo sapiens_R-HSA-73847	1934-01-01	0.846591	1	0.814753	1	9.54709	-1.58995	ADK
473	NCAM1 interactions_Homo sapiens_R-HSA-419037	1937-04-01	0.134556	0.65664	0.124579	0.593766	0.800082	-1.60478	CACNB4;CNTN2;COL6A6;NCAM1
474	BMAL1:CLOCK,NPAS2 activates circadian gene expression_Homo sapiens_R-HSA-1368108	1942-04-01	0.186391	0.71299	0.168322	0.649146	0.962936	-1.61765	NCOA1;NCOA2;RORA;TBL1X
475	Metabolism of water-soluble vitamins and cofactors_Homo sapiens_R-HSA-196849	1998-06-01	0.429582	0.918686	0.362716	0.842639	1.91745	-1.62013	PCCA;GIF;NMNAT3;PRSS3;CTRC;GPHN
476	G beta:gamma signalling through PI3Kgamma_Homo sapiens_R-HSA-392451	1948-02-01	0.73615	1	0.687959	0.986624	5.34104	-1.63607	GAB2;PIK3CB
477	E2F mediated regulation of DNA replication_Homo sapiens_R-HSA-113510	1933-01-01	0.837888	1	0.805593	1	9.26381	-1.6385	PRIM2
478	Degradation of beta-catenin by the destruction complex_Homo sapiens_R-HSA-195253	1982-05-01	0.450105	0.920633	0.388031	0.84485	2.05346	-1.63922	GSK3B;TCF7L2;PSMA1;CTBP2;PPP2R5E
479	Interferon gamma signaling_Homo sapiens_R-HSA-877300	1993-05-01	0.562016	0.952053	0.490168	0.876084	2.86378	-1.65018	CAMK2D;NCAM1;MID1;TRIM10;PIAS1
480	Formation of the HIV-1 Early Elongation Complex_Homo sapiens_R-HSA-167158	1933-01-01	0.837888	1	0.805593	1	9.34506	-1.65287	MNAT1
481	Formation of the Early Elongation Complex_Homo sapiens_R-HSA-113418	1933-01-01	0.837888	1	0.805593	1	9.34657	-1.65314	MNAT1
482	Retrograde transport at the Trans-Golgi-Network_Homo sapiens_R-HSA-6811440	1949-02-01	0.746512	1	0.698426	0.993355	5.72618	-1.67401	VTI1A;RAB6B
483	PCP/CE pathway_Homo sapiens_R-HSA-4086400	1991-05-01	0.542472	0.948336	0.471959	0.871168	2.73925	-1.67538	FZD3;WNT5B;PSMA1;DAAM1;SMURF1
484	Apoptotic execution phase_Homo sapiens_R-HSA-75153	1951-02-01	0.766188	1	0.718488	1	6.29765	-1.67724	CDH1;PTK2
485	Glucagon-like Peptide-1 (GLP1) regulates insulin secretion_Homo sapiens_R-HSA-381676	1942-04-01	0.186391	0.71299	0.168322	0.649146	1.00573	-1.68954	KCNG2;RAP1A;PRKAR2B;RAPGEF4
486	Inactivation, recovery and regulation of the phototransduction cascade_Homo sapiens_R-HSA-2514859	1933-01-01	0.837888	1	0.805593	1	9.63628	-1.70438	CAMKMT
487	Asymmetric localization of PCP proteins_Homo sapiens_R-HSA-4608870	1963-03-01	0.663566	1	0.60505	0.937705	4.18166	-1.71501	FZD3;PSMA1;SMURF1
488	Deadenylation-dependent mRNA decay_Homo sapiens_R-HSA-429914	1950-02-01	0.756521	1	0.708601	1	6.14818	-1.71549	CNOT4;PAN3
489	Collagen formation_Homo sapiens_R-HSA-1474290	1985-05-01	0.481581	0.932562	0.416262	0.855748	2.35911	-1.72376	ADAMTS3;COL24A1;ITGB4;COL23A1;COL6A6
490	Non-integrin membrane-ECM interactions_Homo sapiens_R-HSA-3000171	1942-04-01	0.186391	0.71299	0.168322	0.649146	1.03069	-1.73148	LAMA2;ITGB4;TNC;FGF2
491	Biosynthesis of the N-glycan precursor (dolichol lipid-linked oligosaccharide, LLO) and transfer to a nascent protein_Homo sapiens_R-HSA-446193	1978-05-01	0.407423	0.914075	0.350297	0.842639	1.93436	-1.73687	ST6GAL2;GMDS;ST8SIA1;ALG13;ST8SIA5
492	Activation of Matrix Metalloproteinases_Homo sapiens_R-HSA-1592389	1932-01-01	0.828691	1	0.795981	1	9.50372	-1.78583	MMP16
493	Glucagon signaling in metabolic regulation_Homo sapiens_R-HSA-163359	1933-01-01	0.837888	1	0.805593	1	10.1418	-1.79379	PRKAR2B
494	Activation of gene expression by SREBF (SREBP)_Homo sapiens_R-HSA-2426168	1942-04-01	0.186391	0.71299	0.168322	0.649146	1.08843	-1.82847	NCOA1;NCOA2;ELOVL6;TBL1X
495	Gluconeogenesis_Homo sapiens_R-HSA-70263	1932-01-01	0.828691	1	0.795981	1	9.87291	-1.8552	PFKFB1
496	SUMOylation of DNA damage response and repair proteins_Homo sapiens_R-HSA-3108214	1975-04-01	0.576265	0.968529	0.511823	0.876397	3.38541	-1.866	PCGF2;NSMCE2;SCMH1;PIAS1
497	DNA strand elongation_Homo sapiens_R-HSA-69190	1932-01-01	0.828691	1	0.795981	1	9.93536	-1.86694	PRIM2
498	Class B/2 (Secretin family receptors)_Homo sapiens_R-HSA-373080	1984-05-01	0.471153	0.932562	0.406869	0.851184	2.502	-1.88294	FZD3;CALCB;WNT8B;PTH2R;CRHR2
499	Ion homeostasis_Homo sapiens_R-HSA-5578775	1951-04-01	0.291528	0.867342	0.257542	0.794711	1.54212	-1.90085	SLC8A3;CAMK2D;STIM1;RYR3
500	Keratan sulfate/keratin metabolism_Homo sapiens_R-HSA-1638074	1932-01-01	0.828691	1	0.795981	1	10.1633	-1.90977	B4GALT6
501	Diseases of metabolism_Homo sapiens_R-HSA-5668914	1945-04-01	0.220129	0.789827	0.196819	0.697534	1.26346	-1.9123	GYS2;PCCA;GIF;SFTPD
502	Complex I biogenesis_Homo sapiens_R-HSA-6799198	1949-02-01	0.746512	1	0.698426	0.993355	6.55548	-1.91645	NUBPL;NDUFAF2
503	Regulation of cholesterol biosynthesis by SREBP (SREBF)_Homo sapiens_R-HSA-1655829	1955-04-01	0.340703	0.913117	0.299871	0.842639	1.78484	-1.92181	NCOA1;NCOA2;ELOVL6;TBL1X
504	RNA Polymerase I Transcription Termination_Homo sapiens_R-HSA-73863	1932-01-01	0.828691	1	0.795981	1	10.2366	-1.92354	MNAT1
505	Degradation of GLI2 by the proteasome_Homo sapiens_R-HSA-5610783	1959-03-01	0.619334	0.991381	0.562233	0.912914	4.01975	-1.9259	GSK3B;PSMA1;GLI2
506	Netrin-1 signaling_Homo sapiens_R-HSA-373752	1942-04-01	0.186391	0.71299	0.168322	0.649146	1.15912	-1.94723	TRPC5;TRPC6;SIAH1;PTK2
507	Signaling by FGFR in disease_Homo sapiens_R-HSA-1226099	1963-04-01	0.438934	0.920633	0.386136	0.842639	2.37825	-1.95827	GAB1;GAB2;SOS1;FGF2
508	RNA Polymerase I Transcription Initiation_Homo sapiens_R-HSA-73762	1947-02-01	0.72543	1	0.677195	0.979989	6.10587	-1.95993	MNAT1;GATAD2B
509	Circadian Clock_Homo sapiens_R-HSA-400253	1963-04-01	0.438934	0.920633	0.386136	0.842639	2.42638	-1.99789	NCOA1;NCOA2;RORA;TBL1X
510	Glycolysis_Homo sapiens_R-HSA-70171	1932-01-01	0.828691	1	0.795981	1	10.6806	-2.00697	PFKFB1
511	RHO GTPases activate PKNs_Homo sapiens_R-HSA-5625740	1960-04-01	0.402385	0.914075	0.353739	0.842639	2.20922	-2.01116	NCOA2;AR;SFN;MYL9
512	COPII (Coat Protein 2) Mediated Vesicle Transport_Homo sapiens_R-HSA-204005	1968-04-01	0.498229	0.943418	0.43957	0.861163	2.8914	-2.01443	SEC16B;TRAPPC9;CNIH3;SEC22A
513	HDACs deacetylate histones_Homo sapiens_R-HSA-3214815	1960-04-01	0.402385	0.914075	0.353739	0.842639	2.21966	-2.02066	TBL1X;HDAC8;GATAD2B;PHF21A
514	Amino acid and oligopeptide SLC transporters_Homo sapiens_R-HSA-425374	1949-04-01	0.267294	0.8401	0.236848	0.787367	1.53247	-2.02195	SLC36A1;SLC15A2;SLC16A10;SLC38A4
515	Cell death signalling via NRAGE, NRIF and NADE_Homo sapiens_R-HSA-204998	1961-04-01	0.414628	0.914075	0.364549	0.842639	2.30193	-2.02656	TIAM2;RASGRF2;SOS1;KALRN
516	SUMOylation of RNA binding proteins_Homo sapiens_R-HSA-4570464	1945-02-01	0.702883	1	0.654764	0.960588	5.78143	-2.03833	PCGF2;SCMH1
517	Activation of BH3-only proteins_Homo sapiens_R-HSA-114452	2018-01-29	0.797853	1	0.764208	1	9.0757	-2.04957	SFN
518	Constitutive Signaling by Ligand-Responsive EGFR Cancer Variants_Homo sapiens_R-HSA-1236382	2018-03-19	0.0784445	0.491175	0.0817086	0.476177	0.805551	-2.05042	EGF;GAB1;SOS1
519	MAPK targets/ Nuclear events mediated by MAP kinases_Homo sapiens_R-HSA-450282	2018-01-30	0.808704	1	0.775313	1	9.72304	-2.06442	RPS6KA5
520	NRAGE signals death through JNK_Homo sapiens_R-HSA-193648	1945-04-01	0.220129	0.789827	0.196819	0.697534	1.3729	-2.07795	TIAM2;RASGRF2;SOS1;KALRN
521	Signaling by EGFR in Cancer_Homo sapiens_R-HSA-1643713	2018-03-19	0.0784445	0.491175	0.0817086	0.476177	0.823479	-2.09605	EGF;GAB1;SOS1
522	Formation of Incision Complex in GG-NER_Homo sapiens_R-HSA-5696395	1943-02-01	0.678816	1	0.631108	0.959654	5.42204	-2.10053	MNAT1;PIAS1
523	RMTs methylate histone arginines_Homo sapiens_R-HSA-3214858	1945-02-01	0.702883	1	0.654764	0.960588	5.96531	-2.10316	ARID1A;ARID1B
524	Signaling by Ligand-Responsive EGFR Variants in Cancer_Homo sapiens_R-HSA-5637815	2018-03-19	0.0784445	0.491175	0.0817086	0.476177	0.841187	-2.14113	EGF;GAB1;SOS1
525	HIV Transcription Initiation_Homo sapiens_R-HSA-167161	1944-02-01	0.691043	1	0.64309	0.960588	5.815	-2.14896	MNAT1;TAF3
526	Clathrin derived vesicle budding_Homo sapiens_R-HSA-421837	1970-04-01	0.521191	0.943418	0.460586	0.863327	3.30112	-2.15114	TPD52;DNAJC6;DTNBP1;TPD52L1
527	ABC-family proteins mediated transport_Homo sapiens_R-HSA-382556	1945-04-01	0.220129	0.789827	0.196819	0.697534	1.42373	-2.15488	ABCG8;ABCA10;ABCB5;ABCA9
528	RNA Polymerase II Promoter Escape_Homo sapiens_R-HSA-73776	1944-02-01	0.691043	1	0.64309	0.960588	5.83751	-2.15727	MNAT1;TAF3
529	trans-Golgi Network Vesicle Budding_Homo sapiens_R-HSA-199992	1970-04-01	0.521191	0.943418	0.460586	0.863327	3.31208	-2.15828	TPD52;DNAJC6;DTNBP1;TPD52L1
530	RNA Polymerase II HIV Promoter Escape_Homo sapiens_R-HSA-167162	1944-02-01	0.691043	1	0.64309	0.960588	5.84263	-2.15917	MNAT1;TAF3
531	Surfactant metabolism_Homo sapiens_R-HSA-5683826	2018-01-29	0.797853	1	0.764208	1	9.56478	-2.16002	SFTPD
532	RNA Polymerase II Transcription Initiation And Promoter Clearance_Homo sapiens_R-HSA-76042	1944-02-01	0.691043	1	0.64309	0.960588	5.84568	-2.16029	MNAT1;TAF3
533	RNA Polymerase II Transcription Pre-Initiation And Promoter Opening_Homo sapiens_R-HSA-73779	1944-02-01	0.691043	1	0.64309	0.960588	5.8696	-2.16913	MNAT1;TAF3
534	RNA Polymerase II Transcription Initiation_Homo sapiens_R-HSA-75953	1944-02-01	0.691043	1	0.64309	0.960588	5.87778	-2.17216	MNAT1;TAF3
535	Pre-NOTCH Transcription and Translation_Homo sapiens_R-HSA-1912408	1941-04-01	0.175541	0.71299	0.159171	0.649146	1.24869	-2.17258	NOTCH3;E2F3;MAML3;MAMLD1
536	Deactivation of the beta-catenin transactivating complex_Homo sapiens_R-HSA-3769402	1942-02-01	0.666196	1	0.618814	0.948518	5.34929	-2.17273	TCF7L2;SOX6
537	Semaphorin interactions_Homo sapiens_R-HSA-373755	1967-04-01	0.486571	0.934139	0.428973	0.861163	3.01704	-2.17339	GSK3B;SEMA6A;MYL9;PLXNA4
538	Cell-cell junction organization_Homo sapiens_R-HSA-421270	1961-04-01	0.414628	0.914075	0.364549	0.842639	2.47144	-2.17579	CADM2;CDH1;CLDN18;MPP5
539	Amine ligand-binding receptors_Homo sapiens_R-HSA-375280	1943-04-01	0.197449	0.736016	0.177654	0.664816	1.35352	-2.19579	CHRM2;CHRM3;HTR1F;HTR2A
540	Synthesis of substrates in N-glycan biosythesis_Homo sapiens_R-HSA-446219	1963-04-01	0.438934	0.920633	0.386136	0.842639	2.6776	-2.20475	ST6GAL2;GMDS;ST8SIA1;ST8SIA5
541	Activation of the pre-replicative complex_Homo sapiens_R-HSA-68962	2018-01-30	0.808704	1	0.775313	1	10.4997	-2.22933	PRIM2
542	HSF1 activation_Homo sapiens_R-HSA-3371511	2018-01-29	0.797853	1	0.764208	1	9.87319	-2.22967	RLN1
543	Collagen biosynthesis and modifying enzymes_Homo sapiens_R-HSA-1650814	1963-04-01	0.438934	0.920633	0.386136	0.842639	2.71925	-2.23905	ADAMTS3;COL24A1;COL23A1;COL6A6
544	Cytochrome P450 - arranged by substrate type_Homo sapiens_R-HSA-211897	1962-04-01	0.426814	0.916789	0.37535	0.842639	2.64204	-2.24945	NCOA1;NCOA2;CYP4A22;CYP7B1
545	FCERI mediated Ca+2 mobilization_Homo sapiens_R-HSA-2871809	1962-04-01	0.426814	0.916789	0.37535	0.842639	2.64294	-2.25022	TEC;TXK;NFATC2;SOS1
546	Integrin cell surface interactions_Homo sapiens_R-HSA-216083	1967-04-01	0.486571	0.934139	0.428973	0.861163	3.13942	-2.26155	CDH1;COL23A1;TNC;ITGB8
547	EGFR downregulation_Homo sapiens_R-HSA-182971	2018-01-27	0.774272	1	0.740328	1	8.86397	-2.26769	EGF
548	Golgi Associated Vesicle Biogenesis_Homo sapiens_R-HSA-432722	1954-04-01	0.328356	0.913117	0.289196	0.838886	2.05817	-2.29209	TPD52;DNAJC6;DTNBP1;TPD52L1
549	GPVI-mediated activation cascade_Homo sapiens_R-HSA-114604	1953-03-01	0.545931	0.950913	0.493039	0.876397	3.792	-2.29515	GAB2;PIK3CB;GP6
550	RNA Polymerase I Promoter Escape_Homo sapiens_R-HSA-73772	2018-01-30	0.808704	1	0.775313	1	10.8197	-2.29727	MNAT1
551	mRNA Capping_Homo sapiens_R-HSA-72086	2018-01-29	0.797853	1	0.764208	1	10.173	-2.29737	MNAT1
552	GABA receptor activation_Homo sapiens_R-HSA-977443	1955-03-01	0.571308	0.96358	0.516722	0.877695	4.17351	-2.33644	GABBR1;GABRB1;KCNJ10
553	Pre-NOTCH Expression and Processing_Homo sapiens_R-HSA-1912422	1957-04-01	0.365423	0.914075	0.321347	0.842639	2.32312	-2.33868	NOTCH3;E2F3;MAML3;MAMLD1
554	G-protein beta:gamma signalling_Homo sapiens_R-HSA-397795	1951-03-01	0.519697	0.943418	0.468797	0.867002	3.59168	-2.35079	GAB2;PIK3CB;PLCB1
555	PIWI-interacting RNA (piRNA) biogenesis_Homo sapiens_R-HSA-5601884	2018-01-29	0.797853	1	0.764208	1	10.4302	-2.35546	MAEL
556	Ion transport by P-type ATPases_Homo sapiens_R-HSA-936837	1955-03-01	0.571308	0.96358	0.516722	0.877695	4.35507	-2.43808	CAMK2D;ATP8B1;ATP11A
557	Synthesis of PA_Homo sapiens_R-HSA-1483166	2018-01-28	0.786387	1	0.752555	1	10.598	-2.54677	LCLAT1
558	Signaling by FGFR2 in disease_Homo sapiens_R-HSA-5655253	1943-03-01	0.407503	0.914075	0.367488	0.842639	2.85419	-2.56223	GAB1;SOS1;FGF2
559	Arachidonic acid metabolism_Homo sapiens_R-HSA-2142753	1953-03-01	0.545931	0.950913	0.493039	0.876397	4.26905	-2.5839	EPHX2;CYP4A22;AKR1C3
560	Assembly of collagen fibrils and other multimeric structures_Homo sapiens_R-HSA-2022090	1954-03-01	0.55873	0.952053	0.504953	0.876397	4.44533	-2.58758	COL24A1;ITGB4;COL6A6
561	Signaling by FGFR3 in disease_Homo sapiens_R-HSA-5655332	2018-03-22	0.110962	0.5873	0.110271	0.544535	1.17915	-2.59245	GAB1;SOS1;FGF2
562	Antigen activates B Cell Receptor (BCR) leading to generation of second messengers_Homo sapiens_R-HSA-983695	1947-03-01	0.464892	0.932562	0.418866	0.858666	3.43074	-2.62778	STIM1;CBLB;SOS1
563	Cargo trafficking to the periciliary membrane_Homo sapiens_R-HSA-5620920	1951-03-01	0.519697	0.943418	0.468797	0.867002	4.01893	-2.63043	EXOC4;BBS9;ASAP1
564	Signaling by FGFR3 point mutants in cancer_Homo sapiens_R-HSA-8853338	2018-03-22	0.110962	0.5873	0.110271	0.544535	1.19697	-2.63162	GAB1;SOS1;FGF2
565	TP53 Regulates Transcription of Cell Cycle Genes_Homo sapiens_R-HSA-6791312	1948-03-01	0.478863	0.932562	0.431508	0.861163	3.5787	-2.63514	CNOT4;PLAGL1;SFN
566	Negative regulation of MAPK pathway_Homo sapiens_R-HSA-5675221	1940-03-01	0.363279	0.914075	0.328436	0.842639	2.6128	-2.64567	KSR1;PPP2R5E;BRAF
567	RNA Polymerase III Abortive And Retractive Initiation_Homo sapiens_R-HSA-749476	1941-02-01	0.65318	1	0.606208	0.937705	6.22481	-2.65116	NFIA;NFIB
568	RNA Polymerase III Transcription_Homo sapiens_R-HSA-74158	1941-02-01	0.65318	1	0.606208	0.937705	6.23296	-2.65464	NFIA;NFIB
569	RNA Pol II CTD phosphorylation and interaction with CE_Homo sapiens_R-HSA-167160	2018-01-27	0.774272	1	0.740328	1	10.471	-2.67883	MNAT1
570	Budding and maturation of HIV virion_Homo sapiens_R-HSA-162588	2018-01-25	0.747943	1	0.714036	1	9.224	-2.67891	NEDD4L
571	Pyruvate metabolism_Homo sapiens_R-HSA-70268	2018-01-27	0.774272	1	0.740328	1	10.5037	-2.68717	LDHC
572	RNA Pol II CTD phosphorylation and interaction with CE_Homo sapiens_R-HSA-77075	2018-01-27	0.774272	1	0.740328	1	10.5449	-2.69771	MNAT1
573	Intra-Golgi traffic_Homo sapiens_R-HSA-6811438	1944-03-01	0.422049	0.914075	0.380431	0.842639	3.15691	-2.72325	RAB30;MAN1C1;VTI1A
574	Sema4D in semaphorin signaling_Homo sapiens_R-HSA-400685	2018-01-27	0.774272	1	0.740328	1	10.7186	-2.74215	MYL9
575	G alpha (z) signalling events_Homo sapiens_R-HSA-418597	1946-03-01	0.450757	0.920633	0.406131	0.851184	3.4809	-2.77367	RGS17;PRKCE;RGS20
576	Mitochondrial biogenesis_Homo sapiens_R-HSA-1592230	1949-03-01	0.492661	0.943418	0.444051	0.863327	3.92467	-2.77841	NCOA1;NCOA2;TBL1X
577	Inositol phosphate metabolism_Homo sapiens_R-HSA-1483249	1944-03-01	0.422049	0.914075	0.380431	0.842639	3.22702	-2.78374	INPP4B;PLCB4;PLCB1
578	GABA B receptor activation_Homo sapiens_R-HSA-977444	1939-02-01	0.625937	0.991381	0.580055	0.915474	5.94656	-2.78599	GABBR1;KCNJ10
579	Activation of GABAB receptors_Homo sapiens_R-HSA-991365	1939-02-01	0.625937	0.991381	0.580055	0.915474	5.95256	-2.7888	GABBR1;KCNJ10
580	Keratan sulfate biosynthesis_Homo sapiens_R-HSA-2022854	2018-01-27	0.774272	1	0.740328	1	10.9229	-2.79444	B4GALT6
581	Cyclin D associated events in G1_Homo sapiens_R-HSA-69231	1938-02-01	0.611705	0.986554	0.566509	0.915474	5.70728	-2.80516	E2F3;MNAT1
582	G1 Phase_Homo sapiens_R-HSA-69236	1938-02-01	0.611705	0.986554	0.566509	0.915474	5.72266	-2.81272	E2F3;MNAT1
583	Extension of Telomeres_Homo sapiens_R-HSA-180786	2018-01-28	0.786387	1	0.752555	1	11.8158	-2.8394	PRIM2
584	Constitutive Signaling by AKT1 E17K in Cancer_Homo sapiens_R-HSA-5674400	2018-03-25	0.147678	0.687502	0.142055	0.635926	1.5628	-2.98919	GSK3B;FOXO3;FOXO1
585	Nuclear signaling by ERBB4_Homo sapiens_R-HSA-1251985	1939-03-01	0.348402	0.913117	0.315391	0.842639	2.83999	-2.99448	WWOX;NRG1;NRG2
586	Attenuation phase_Homo sapiens_R-HSA-3371568	2018-01-26	0.76147	1	0.727498	1	11.0152	-3.00168	RLN1
587	Elastic fibre formation_Homo sapiens_R-HSA-1566948	1941-03-01	0.378101	0.914075	0.341477	0.842639	3.10203	-3.01701	TGFB2;ITGB8;LTBP1
588	EPHB-mediated forward signaling_Homo sapiens_R-HSA-3928662	1942-03-01	0.392848	0.914075	0.354499	0.842639	3.23222	-3.01997	RASA1;KALRN;PTK2
589	Resolution of D-loop Structures through Synthesis-Dependent Strand Annealing (SDSA)_Homo sapiens_R-HSA-5693554	2018-01-26	0.76147	1	0.727498	1	11.1111	-3.02784	RAD51B
590	Transcriptional activation of mitochondrial biogenesis_Homo sapiens_R-HSA-2151201	1940-03-01	0.363279	0.914075	0.328436	0.842639	2.99173	-3.02938	NCOA1;NCOA2;TBL1X
591	Kinesins_Homo sapiens_R-HSA-983189	1944-03-01	0.422049	0.914075	0.380431	0.842639	3.52959	-3.04474	KIF26B;KIF21A;KIF6
592	MAP2K and MAPK activation_Homo sapiens_R-HSA-5674135	1938-03-01	0.33349	0.913117	0.302356	0.842639	2.7934	-3.06756	RAP1A;KSR1;BRAF
593	Ionotropic activity of Kainate Receptors_Homo sapiens_R-HSA-451306	2018-03-10	0.0138736	0.221515	0.0206729	0.222122	0.722066	-3.08883	GRIK4;GRIK1;NCALD
594	Activation of Ca-permeable Kainate Receptor_Homo sapiens_R-HSA-451308	2018-03-10	0.0138736	0.221515	0.0206729	0.222122	0.722713	-3.0916	GRIK4;GRIK1;NCALD
595	Downregulation of SMAD2/3:SMAD4 transcriptional activity_Homo sapiens_R-HSA-2173795	2018-01-23	0.718546	1	0.685089	0.983981	9.3733	-3.09812	NEDD4L
596	Gamma carboxylation, hypusine formation and arylsulfatase activation_Homo sapiens_R-HSA-163841	1939-02-01	0.625937	0.991381	0.580055	0.915474	6.6132	-3.09832	FN3K;PROS1
597	Syndecan interactions_Homo sapiens_R-HSA-3000170	2018-03-20	0.0887614	0.520227	0.0908347	0.497453	1.28656	-3.11578	ITGB4;TNC;FGF2
598	Metal ion SLC transporters_Homo sapiens_R-HSA-425410	2018-01-25	0.747943	1	0.714036	1	10.8019	-3.13719	CP
599	Glutamate Binding, Activation of AMPA Receptors and Synaptic Plasticity_Homo sapiens_R-HSA-399721	2018-03-31	0.230038	0.803755	0.212841	0.733458	2.14012	-3.14493	GRIP1;CAMK2D;MYO6
600	PKMTs methylate histone lysines_Homo sapiens_R-HSA-3214841	1940-03-01	0.363279	0.914075	0.328436	0.842639	3.12473	-3.16405	KMT2A;KMT2C;SMYD3
601	Trafficking of AMPA receptors_Homo sapiens_R-HSA-399719	2018-03-31	0.230038	0.803755	0.212841	0.733458	2.15581	-3.16799	GRIP1;CAMK2D;MYO6
602	RHO GTPases Activate WASPs and WAVEs_Homo sapiens_R-HSA-5663213	1936-03-01	0.303643	0.897808	0.276383	0.832429	2.69394	-3.21091	NCKAP1;WIPF3;PTK2
603	Formation of Fibrin Clot (Clotting Cascade)_Homo sapiens_R-HSA-140877	1939-03-01	0.348402	0.913117	0.315391	0.842639	3.08698	-3.2549	PROS1;GP1BA;GP5
604	Transcriptional regulation of pluripotent stem cells_Homo sapiens_R-HSA-452723	1942-03-01	0.392848	0.914075	0.354499	0.842639	3.49281	-3.26345	NR6A1;FGF2;PBX1
605	Glyoxylate metabolism and glycine degradation_Homo sapiens_R-HSA-389661	2018-01-25	0.747943	1	0.714036	1	11.495	-3.33847	BCKDHB
606	Nuclear Events (kinase and transcription factor activation)_Homo sapiens_R-HSA-198725	2018-01-24	0.733649	1	0.699911	0.993355	10.9146	-3.38052	RPS6KA5
607	PTK6 Regulates RHO GTPases, RAS GTPase and MAP kinases_Homo sapiens_R-HSA-8849471	2018-03-26	0.160691	0.699735	0.153259	0.649146	1.8536	-3.38888	RASA1;ELMO1;RASAL2
608	Glutamate Neurotransmitter Release Cycle_Homo sapiens_R-HSA-210500	2018-01-24	0.733649	1	0.699911	0.993355	10.9474	-3.39067	STXBP1
609	HDMs demethylate histones_Homo sapiens_R-HSA-3214842	2018-01-25	0.747943	1	0.714036	1	11.7715	-3.4188	KDM6A
610	Negative regulation of FGFR2 signaling_Homo sapiens_R-HSA-5654727	1934-02-01	0.550669	0.952053	0.509233	0.876397	5.74237	-3.42602	BRAF;FGF2
611	Platelet Adhesion to exposed collagen_Homo sapiens_R-HSA-75892	2018-03-13	0.0293288	0.292677	0.0364833	0.293706	0.991808	-3.50027	GP1BA;GP6;GP5
612	Amino acid transport across the plasma membrane_Homo sapiens_R-HSA-352230	2018-03-31	0.230038	0.803755	0.212841	0.733458	2.39635	-3.52147	SLC36A1;SLC16A10;SLC38A4
613	Apoptotic cleavage of cellular proteins_Homo sapiens_R-HSA-111465	1937-02-01	0.597062	0.985824	0.552651	0.910343	6.89066	-3.55375	CDH1;PTK2
614	Post-translational modification: synthesis of GPI-anchored proteins_Homo sapiens_R-HSA-163125	2018-01-25	0.747943	1	0.714036	1	12.3625	-3.59043	PIGC
615	Cyclin A/B1 associated events during G2/M transition_Homo sapiens_R-HSA-69273	2018-01-22	0.702587	1	0.669537	0.970373	10.1753	-3.59174	MNAT1
616	Calmodulin induced events_Homo sapiens_R-HSA-111933	2018-03-26	0.160691	0.699735	0.153259	0.649146	1.96813	-3.59829	PDE1C;PRKAR2B;PDE1A
617	Sema4D induced cell migration and growth-cone collapse_Homo sapiens_R-HSA-416572	2018-01-24	0.733649	1	0.699911	0.993355	11.6304	-3.60222	MYL9
618	Regulation of beta-cell development_Homo sapiens_R-HSA-186712	1932-03-01	0.244537	0.810612	0.225315	0.754726	2.55874	-3.6037	HNF4A;PAX6;FOXO1
619	Regulation of TP53 Activity through Acetylation_Homo sapiens_R-HSA-6804758	2018-01-23	0.718546	1	0.685089	0.983981	10.9586	-3.62211	GATAD2B
620	Activated PKN1 stimulates transcription of AR (androgen receptor) regulated genes KLK2 and KLK3_Homo sapiens_R-HSA-5625886	1934-02-01	0.550669	0.952053	0.509233	0.876397	6.07523	-3.62461	NCOA2;AR
621	Molecules associated with elastic fibres_Homo sapiens_R-HSA-2129379	2018-03-30	0.215707	0.782754	0.200524	0.706256	2.36613	-3.62925	TGFB2;ITGB8;LTBP1
622	CTLA4 inhibitory signaling_Homo sapiens_R-HSA-389513	2018-01-22	0.702587	1	0.669537	0.970373	10.3141	-3.64074	PPP2R5E
623	Endogenous sterols_Homo sapiens_R-HSA-211976	2018-03-24	0.135029	0.65664	0.13114	0.618876	1.81917	-3.64246	NCOA1;NCOA2;CYP7B1
624	CaM pathway_Homo sapiens_R-HSA-111997	2018-03-26	0.160691	0.699735	0.153259	0.649146	1.99561	-3.64852	PDE1C;PRKAR2B;PDE1A
625	TGF-beta receptor signaling activates SMADs_Homo sapiens_R-HSA-2173789	1932-02-01	0.517711	0.943418	0.478798	0.87536	5.54273	-3.64899	SMURF1;NEDD4L
626	RAF activation_Homo sapiens_R-HSA-5673000	2018-03-25	0.147678	0.687502	0.142055	0.635926	1.91504	-3.66293	KSR1;PPP2R5E;BRAF
627	Recycling pathway of L1_Homo sapiens_R-HSA-437239	2018-03-26	0.160691	0.699735	0.153259	0.649146	2.01626	-3.68627	DNM3;RPS6KA6;RPS6KA5
628	Incretin synthesis, secretion, and inactivation_Homo sapiens_R-HSA-400508	2018-03-23	0.122779	0.625651	0.120538	0.587111	1.76398	-3.69972	PCSK1;TCF7L2;PAX6
629	Constitutive Signaling by EGFRvIII_Homo sapiens_R-HSA-5637810	2018-03-15	0.0431012	0.335699	0.0496262	0.356699	1.1767	-3.69978	EGF;GAB1;SOS1
630	Signaling by BMP_Homo sapiens_R-HSA-201451	2018-01-23	0.718546	1	0.685089	0.983981	11.2175	-3.70766	SMURF1
631	Negative regulation of FGFR1 signaling_Homo sapiens_R-HSA-5654726	1932-02-01	0.517711	0.943418	0.478798	0.87536	5.64132	-3.7139	BRAF;FGF2
632	FGFR1 mutant receptor activation_Homo sapiens_R-HSA-1839124	1931-02-01	0.500637	0.943418	0.463153	0.863327	5.37364	-3.71788	GAB2;FGF2
633	Signaling by NOTCH2_Homo sapiens_R-HSA-1980145	1932-02-01	0.517711	0.943418	0.478798	0.87536	5.64742	-3.71792	MAML3;MAMLD1
634	Fertilization_Homo sapiens_R-HSA-1187000	2018-03-26	0.160691	0.699735	0.153259	0.649146	2.03947	-3.72871	CATSPER3;CATSPERB;ADAM20
635	Ca-dependent events_Homo sapiens_R-HSA-111996	2018-03-28	0.187672	0.71299	0.176447	0.662887	2.2445	-3.75517	PDE1C;PRKAR2B;PDE1A
636	Regulation of gene expression in beta cells_Homo sapiens_R-HSA-210745	2018-03-20	0.0887614	0.520227	0.0908347	0.497453	1.55341	-3.76205	HNF4A;PAX6;FOXO1
637	BBSome-mediated cargo-targeting to cilium_Homo sapiens_R-HSA-5620922	2018-01-23	0.718546	1	0.685089	0.983981	11.3866	-3.76357	BBS9
638	Sphingolipid de novo biosynthesis_Homo sapiens_R-HSA-1660661	1933-03-01	0.259176	0.838819	0.237926	0.787367	2.80815	-3.7917	SGMS1;PPM1L;SPTLC3
639	Thrombin signalling through proteinase activated receptors (PARs)_Homo sapiens_R-HSA-456926	1932-03-01	0.244537	0.810612	0.225315	0.754726	2.69576	-3.79667	GNA14;GNAQ;GNA12
640	CD209 (DC-SIGN) signaling_Homo sapiens_R-HSA-5621575	2018-01-21	0.685724	1	0.653219	0.960588	10.1858	-3.8429	RPS6KA5
641	Effects of PIP2 hydrolysis_Homo sapiens_R-HSA-114508	2018-03-27	0.174034	0.712865	0.164731	0.649146	2.19989	-3.84652	DGKG;TRPC6;PRKCE
642	Reproduction_Homo sapiens_R-HSA-1474165	2018-03-26	0.160691	0.699735	0.153259	0.649146	2.10454	-3.84767	CATSPER3;CATSPERB;ADAM20
643	Hormone ligand-binding receptors_Homo sapiens_R-HSA-375281	2018-03-11	0.0183265	0.254446	0.0254129	0.248424	0.965331	-3.86075	GNRH2;GNRHR;TSHR
644	Sialic acid metabolism_Homo sapiens_R-HSA-4085001	1933-03-01	0.259176	0.838819	0.237926	0.787367	2.86107	-3.86316	ST6GAL2;ST8SIA1;ST8SIA5
645	HSF1-dependent transactivation_Homo sapiens_R-HSA-3371571	1934-02-01	0.550669	0.952053	0.509233	0.876397	6.50319	-3.87994	CAMK2D;RLN1
646	Signaling by EGFRvIII in Cancer_Homo sapiens_R-HSA-5637812	2018-03-15	0.0431012	0.335699	0.0496262	0.356699	1.2355	-3.88466	EGF;GAB1;SOS1
647	EPHA-mediated growth cone collapse_Homo sapiens_R-HSA-3928663	1934-02-01	0.550669	0.952053	0.509233	0.876397	6.55331	-3.90984	MYL9;PTK2
648	Resolution of D-Loop Structures_Homo sapiens_R-HSA-5693537	1933-02-01	0.53439	0.943418	0.494161	0.876397	6.25266	-3.9181	RAD51B;SPIDR
649	Negative regulation of FGFR4 signaling_Homo sapiens_R-HSA-5654733	1931-02-01	0.500637	0.943418	0.463153	0.863327	5.75679	-3.98297	BRAF;FGF2
650	ERBB2 Activates PTK6 Signaling_Homo sapiens_R-HSA-8847993	2018-03-13	0.0293288	0.292677	0.0364833	0.293706	1.1326	-3.99717	EGF;NRG1;NRG2
651	Synthesis, secretion, and inactivation of Glucagon-like Peptide-1 (GLP-1)_Homo sapiens_R-HSA-381771	2018-03-20	0.0887614	0.520227	0.0908347	0.497453	1.65323	-4.00381	PCSK1;TCF7L2;PAX6
652	Signal transduction by L1_Homo sapiens_R-HSA-445144	2018-01-21	0.685724	1	0.653219	0.960588	10.7424	-4.05289	NCAM1
653	Insulin processing_Homo sapiens_R-HSA-264876	2018-03-24	0.135029	0.65664	0.13114	0.618876	2.02512	-4.05482	PCSK1;EXOC4;RAB27A
654	The canonical retinoid cycle in rods (twilight vision)_Homo sapiens_R-HSA-2453902	2018-01-23	0.718546	1	0.685089	0.983981	12.2806	-4.05907	RBP1
655	Phase 1 - inactivation of fast Na+ channels_Homo sapiens_R-HSA-5576894	2018-03-27	0.174034	0.712865	0.164731	0.649146	2.32892	-4.07212	CACNB4;KCNIP1;CACNA2D3
656	FGFR2 ligand binding and activation_Homo sapiens_R-HSA-190241	2018-01-20	0.667906	1	0.636096	0.959654	10.3087	-4.16069	FGF2
657	SALM protein interactions at the synapse_Homo sapiens_R-HSA-8849932	2018-01-22	0.702587	1	0.669537	0.970373	11.8091	-4.16844	GRIN2C
658	Ligand-gated ion channel transport_Homo sapiens_R-HSA-975298	2018-03-26	0.160691	0.699735	0.153259	0.649146	2.28951	-4.18586	GLRA1;GABRB1;GLRA2
659	RA biosynthesis pathway_Homo sapiens_R-HSA-5365859	2018-01-22	0.702587	1	0.669537	0.970373	11.8826	-4.19439	AKR1C3
660	COPI-independent Golgi-to-ER retrograde traffic_Homo sapiens_R-HSA-6811436	2018-03-29	0.201574	0.739878	0.188385	0.679191	2.61923	-4.19495	BICD1;RAB6B;DYNC1I1
661	Resolution of D-loop Structures through Holliday Junction Intermediates_Homo sapiens_R-HSA-5693568	1932-02-01	0.517711	0.943418	0.478798	0.87536	6.37706	-4.19826	RAD51B;SPIDR
662	Signal amplification_Homo sapiens_R-HSA-392518	1932-02-01	0.517711	0.943418	0.478798	0.87536	6.45052	-4.24663	GNA14;GNAQ
663	Negative regulation of FGFR3 signaling_Homo sapiens_R-HSA-5654732	2029-02-01	0.465348	0.932562	0.431058	0.861163	5.55186	-4.24701	BRAF;FGF2
664	Inwardly rectifying K+ channels_Homo sapiens_R-HSA-1296065	1931-02-01	0.500637	0.943418	0.463153	0.863327	6.17458	-4.27203	GABBR1;KCNJ10
665	NICD traffics to nucleus_Homo sapiens_R-HSA-157052	2018-03-13	0.0293288	0.292677	0.0364833	0.293706	1.21081	-4.27316	NOTCH3;MAML3;MAMLD1
666	Adherens junctions interactions_Homo sapiens_R-HSA-418990	1931-02-01	0.500637	0.943418	0.463153	0.863327	6.25561	-4.32809	CADM2;CDH1
667	Notch-HLH transcription pathway_Homo sapiens_R-HSA-350054	2018-03-13	0.0293288	0.292677	0.0364833	0.293706	1.23634	-4.36326	NOTCH3;MAML3;MAMLD1
668	Elevation of cytosolic Ca2+ levels_Homo sapiens_R-HSA-139853	2018-03-15	0.0431012	0.335699	0.0496262	0.356699	1.39046	-4.37188	TRPC6;STIM1;P2RX3
669	Downregulation of TGF-beta receptor signaling_Homo sapiens_R-HSA-2173788	2018-02-26	0.409764	0.914075	0.381095	0.842639	4.90542	-4.37649	SMURF1;NEDD4L
670	Tight junction interactions_Homo sapiens_R-HSA-420029	1930-02-01	0.483179	0.932562	0.447236	0.863327	6.12632	-4.45609	CLDN18;MPP5
671	Common Pathway of Fibrin Clot Formation_Homo sapiens_R-HSA-140875	2018-01-22	0.702587	1	0.669537	0.970373	12.7795	-4.51098	PROS1
672	ERK/MAPK targets_Homo sapiens_R-HSA-198753	2018-01-21	0.685724	1	0.653219	0.960588	11.9587	-4.51177	RPS6KA5
673	Ras activation uopn Ca2+ infux through NMDA receptor_Homo sapiens_R-HSA-442982	2018-03-17	0.0595327	0.401636	0.0647449	0.410765	1.61367	-4.55254	CAMK2D;RASGRF2;GRIN2C
674	HS-GAG degradation_Homo sapiens_R-HSA-2024096	2018-03-21	0.0996114	0.548435	0.100363	0.531202	1.99702	-4.60608	HPSE2;GPC5;GPC6
675	SHC-mediated cascade:FGFR2_Homo sapiens_R-HSA-5654699	2018-02-26	0.409764	0.914075	0.381095	0.842639	5.18457	-4.62554	SOS1;FGF2
676	Synthesis of Leukotrienes (LT) and Eoxins (EX)_Homo sapiens_R-HSA-2142691	2018-01-21	0.685724	1	0.653219	0.960588	12.287	-4.63563	CYP4A22
677	Regulation of Insulin-like Growth Factor (IGF) transport and uptake by Insulin-like Growth Factor Binding Proteins (IGFBPs)_Homo sapiens_R-HSA-381426	2018-01-21	0.685724	1	0.653219	0.960588	12.5327	-4.72833	IGFBP5
678	Telomere C-strand (Lagging Strand) Synthesis_Homo sapiens_R-HSA-174417	2018-01-22	0.702587	1	0.669537	0.970373	13.3986	-4.72952	PRIM2
679	Aflatoxin activation and detoxification_Homo sapiens_R-HSA-5423646	2018-01-21	0.685724	1	0.653219	0.960588	12.5653	-4.74064	AKR7A3
680	Rap1 signalling_Homo sapiens_R-HSA-392517	2018-03-16	0.0509944	0.372921	0.0569461	0.379271	1.59697	-4.75263	RAP1A;PRKG1;RAPGEF4
681	SHC-mediated cascade:FGFR4_Homo sapiens_R-HSA-5654719	2018-02-23	0.351492	0.913117	0.329368	0.842639	4.56447	-4.77247	SOS1;FGF2
682	Gap junction trafficking and regulation_Homo sapiens_R-HSA-157858	1930-02-01	0.483179	0.932562	0.447236	0.863327	6.60518	-4.80439	MYO6;GJB7
683	Amine compound SLC transporters_Homo sapiens_R-HSA-425428	1930-02-01	0.483179	0.932562	0.447236	0.863327	6.72233	-4.8896	SLC14A1;SLC6A13
684	Nephrin interactions_Homo sapiens_R-HSA-373753	2018-02-22	0.331604	0.913117	0.31184	0.842639	4.44295	-4.9042	MAGI2;PIK3CB
685	eNOS activation and regulation_Homo sapiens_R-HSA-203765	2018-01-20	0.667906	1	0.636096	0.959654	12.2802	-4.9564	NOSTRIN
686	Cobalamin (Cbl, vitamin B12) transport and metabolism_Homo sapiens_R-HSA-196741	2018-03-21	0.0996114	0.548435	0.100363	0.531202	2.16535	-4.99433	GIF;PRSS3;CTRC
687	Metabolism of nitric oxide_Homo sapiens_R-HSA-202131	2018-01-20	0.667906	1	0.636096	0.959654	12.4562	-5.0274	NOSTRIN
688	Nef-mediates down modulation of cell surface receptors by recruiting them to clathrin adapters_Homo sapiens_R-HSA-164938	2018-01-21	0.685724	1	0.653219	0.960588	13.3808	-5.0483	PACS1
689	Mitochondrial tRNA aminoacylation_Homo sapiens_R-HSA-379726	2018-01-21	0.685724	1	0.653219	0.960588	13.4718	-5.08262	FARS2
690	Presynaptic function of Kainate receptors_Homo sapiens_R-HSA-500657	2018-01-21	0.685724	1	0.653219	0.960588	13.5416	-5.10899	PLCB1
691	The role of Nef in HIV-1 replication and disease pathogenesis_Homo sapiens_R-HSA-164952	2018-02-28	0.447157	0.920633	0.414632	0.85423	6.34909	-5.11004	PACS1;ELMO1
692	SHC-mediated cascade:FGFR1_Homo sapiens_R-HSA-5654688	2018-02-21	0.311545	0.901698	0.294217	0.838886	4.43588	-5.17317	SOS1;FGF2
693	Gap junction trafficking_Homo sapiens_R-HSA-190828	2018-02-28	0.447157	0.920633	0.414632	0.85423	6.44248	-5.18521	MYO6;GJB7
694	Synthesis of IP3 and IP4 in the cytosol_Homo sapiens_R-HSA-1855204	2018-02-25	0.390604	0.914075	0.364021	0.842639	5.5306	-5.1991	PLCB4;PLCB1
695	Diseases associated with glycosaminoglycan metabolism_Homo sapiens_R-HSA-3560782	2018-02-26	0.409764	0.914075	0.381095	0.842639	5.84305	-5.21302	GPC5;GPC6
696	Conversion from APC/C:Cdc20 to APC/C:Cdh1 in late anaphase_Homo sapiens_R-HSA-176407	2018-01-19	0.649079	1	0.618131	0.948518	12.1895	-5.26833	CDC14A
697	ADP signalling through P2Y purinoceptor 1_Homo sapiens_R-HSA-418592	2018-02-25	0.390604	0.914075	0.364021	0.842639	5.61366	-5.27718	GNA14;GNAQ
698	Chondroitin sulfate biosynthesis_Homo sapiens_R-HSA-2022870	2018-03-20	0.0887614	0.520227	0.0908347	0.497453	2.18839	-5.29986	CSGALNACT1;CHST11;CHSY3
699	Activation of G protein gated Potassium channels_Homo sapiens_R-HSA-1296041	2018-02-25	0.390604	0.914075	0.364021	0.842639	5.64542	-5.30704	GABBR1;KCNJ10
700	Thromboxane signalling through TP receptor_Homo sapiens_R-HSA-428930	2018-02-23	0.351492	0.913117	0.329368	0.842639	5.08101	-5.31255	GNA14;GNAQ
701	G protein gated Potassium channels_Homo sapiens_R-HSA-1296059	2018-02-25	0.390604	0.914075	0.364021	0.842639	5.67273	-5.33271	GABBR1;KCNJ10
702	Dopamine Neurotransmitter Release Cycle_Homo sapiens_R-HSA-212676	2018-02-23	0.351492	0.913117	0.329368	0.842639	5.1064	-5.3391	STXBP1;APBA1
703	Inhibition of voltage gated Ca2+ channels via Gbeta/gamma subunits_Homo sapiens_R-HSA-997272	2018-02-25	0.390604	0.914075	0.364021	0.842639	5.68981	-5.34876	GABBR1;KCNJ10
704	Deadenylation of mRNA_Homo sapiens_R-HSA-429947	2018-02-23	0.351492	0.913117	0.329368	0.842639	5.13648	-5.37055	CNOT4;PAN3
705	N-glycan antennae elongation in the medial/trans-Golgi_Homo sapiens_R-HSA-975576	2018-02-26	0.409764	0.914075	0.381095	0.842639	6.02434	-5.37476	FUT8;B4GALT6
706	TRP channels_Homo sapiens_R-HSA-3295583	2018-02-25	0.390604	0.914075	0.364021	0.842639	5.84934	-5.49873	TRPC5;TRPC6
707	A tetrasaccharide linker sequence is required for GAG synthesis_Homo sapiens_R-HSA-1971475	2018-02-26	0.409764	0.914075	0.381095	0.842639	6.16755	-5.50253	GPC5;GPC6
708	G beta:gamma signalling through PLC beta_Homo sapiens_R-HSA-418217	2018-01-20	0.667906	1	0.636096	0.959654	13.7675	-5.55666	PLCB1
709	Lagging Strand Synthesis_Homo sapiens_R-HSA-69186	2018-01-20	0.667906	1	0.636096	0.959654	13.8952	-5.60821	PRIM2
710	DARPP-32 events_Homo sapiens_R-HSA-180024	2018-02-24	0.37117	0.914075	0.34677	0.842639	5.67105	-5.62055	PRKAR2B;PDE4D
711	GRB2:SOS provides linkage to MAPK signaling for Integrins_Homo sapiens_R-HSA-354194	2018-03-15	0.0431012	0.335699	0.0496262	0.356699	1.80491	-5.675	RAP1A;SOS1;PTK2
712	RNA Polymerase III Transcription Termination_Homo sapiens_R-HSA-73980	2018-02-23	0.351492	0.913117	0.329368	0.842639	5.4348	-5.68246	NFIA;NFIB
713	Phase 2 - plateau phase_Homo sapiens_R-HSA-5576893	2018-02-26	0.409764	0.914075	0.381095	0.842639	6.39217	-5.70294	CACNB4;CACNA2D3
714	Signaling by FGFR2 IIIa TM_Homo sapiens_R-HSA-8851708	2018-01-19	0.649079	1	0.618131	0.948518	13.2031	-5.70641	FGF2
715	Activated point mutants of FGFR2_Homo sapiens_R-HSA-2033519	2018-01-17	0.608165	0.985824	0.579502	0.915474	11.5155	-5.72676	FGF2
716	RHO GTPases activate PAKs_Homo sapiens_R-HSA-5627123	2018-02-21	0.311545	0.901698	0.294217	0.838886	4.97718	-5.80444	MYL9;MYLK
717	WNT ligand biogenesis and trafficking_Homo sapiens_R-HSA-3238698	2018-02-26	0.409764	0.914075	0.381095	0.842639	6.52637	-5.82266	WNT5B;WNT8B
718	Laminin interactions_Homo sapiens_R-HSA-3000157	2018-02-23	0.351492	0.913117	0.329368	0.842639	5.5738	-5.8278	LAMA2;ITGB4
719	Metabolism of Angiotensinogen to Angiotensins_Homo sapiens_R-HSA-2022377	2018-03-16	0.0509944	0.372921	0.0569461	0.379271	1.96251	-5.84051	CPB2;CPB1;MME
720	Regulation of signaling by CBL_Homo sapiens_R-HSA-912631	2018-01-18	0.629185	0.991381	0.599281	0.931998	12.6168	-5.84573	PIK3CB
721	Regulation of Complement cascade_Homo sapiens_R-HSA-977606	2018-02-26	0.409764	0.914075	0.381095	0.842639	6.55287	-5.84631	PROS1;C9
722	Signaling by Hippo_Homo sapiens_R-HSA-2028269	2018-01-20	0.667906	1	0.636096	0.959654	14.5347	-5.86633	STK3
723	Signaling by cytosolic FGFR1 fusion mutants_Homo sapiens_R-HSA-1839117	2018-01-18	0.629185	0.991381	0.599281	0.931998	12.7256	-5.89612	GAB2
724	SHC-mediated cascade:FGFR3_Homo sapiens_R-HSA-5654704	2018-02-18	0.250821	0.820092	0.241124	0.787367	4.31944	-5.97384	SOS1;FGF2
725	Norepinephrine Neurotransmitter Release Cycle_Homo sapiens_R-HSA-181430	2018-01-18	0.629185	0.991381	0.599281	0.931998	12.9287	-5.99025	STXBP1
726	Phase 4 - resting membrane potential_Homo sapiens_R-HSA-5576886	2018-02-19	0.271101	0.8401	0.25882	0.794711	4.61447	-6.0231	KCNK10;KCNK9
727	Serotonin Neurotransmitter Release Cycle_Homo sapiens_R-HSA-181429	2018-01-18	0.629185	0.991381	0.599281	0.931998	13.0142	-6.02985	STXBP1
728	Trafficking of GluR2-containing AMPA receptors_Homo sapiens_R-HSA-416993	2018-01-17	0.608165	0.985824	0.579502	0.915474	12.1404	-6.03752	GRIP1
729	RHO GTPases Activate ROCKs_Homo sapiens_R-HSA-5627117	2018-01-17	0.608165	0.985824	0.579502	0.915474	12.1642	-6.04936	MYL9
730	TGF-beta receptor signaling in EMT (epithelial to mesenchymal transition)_Homo sapiens_R-HSA-2173791	2018-01-16	0.585955	0.971184	0.558749	0.910343	11.3778	-6.08156	SMURF1
731	Branched-chain amino acid catabolism_Homo sapiens_R-HSA-70895	2018-02-23	0.351492	0.913117	0.329368	0.842639	5.87585	-6.1436	TMLHE;BCKDHB
732	Spry regulation of FGF signaling_Homo sapiens_R-HSA-1295596	2018-01-16	0.585955	0.971184	0.558749	0.910343	11.5353	-6.16576	BRAF
733	Gap junction assembly_Homo sapiens_R-HSA-190861	2018-01-19	0.649079	1	0.618131	0.948518	14.4563	-6.24801	GJB7
734	Synthesis, secretion, and deacylation of Ghrelin_Homo sapiens_R-HSA-422085	2018-01-17	0.608165	0.985824	0.579502	0.915474	12.5816	-6.25692	PCSK1
735	Na+/Cl- dependent neurotransmitter transporters_Homo sapiens_R-HSA-442660	2018-01-19	0.649079	1	0.618131	0.948518	14.4803	-6.25839	SLC6A13
736	TNFs bind their physiological receptors_Homo sapiens_R-HSA-5669034	2018-02-24	0.37117	0.914075	0.34677	0.842639	6.35585	-6.29925	EDAR;EDA
737	Intrinsic Pathway of Fibrin Clot Formation_Homo sapiens_R-HSA-140837	2018-02-22	0.331604	0.913117	0.31184	0.842639	5.75249	-6.34968	GP1BA;GP5
738	ABC transporters in lipid homeostasis_Homo sapiens_R-HSA-1369062	2018-03-17	0.0595327	0.401636	0.0647449	0.410765	2.25187	-6.35304	ABCG8;ABCA10;ABCA9
739	Glycogen synthesis_Homo sapiens_R-HSA-3322077	2018-01-15	0.562486	0.952053	0.536975	0.893094	11.1024	-6.3882	GYS2
740	Amine-derived hormones_Homo sapiens_R-HSA-209776	2018-01-18	0.629185	0.991381	0.599281	0.931998	14.0121	-6.49222	DIO1
741	TP53 Regulates Transcription of Genes Involved in G2 Cell Cycle Arrest_Homo sapiens_R-HSA-6804114	2018-01-18	0.629185	0.991381	0.599281	0.931998	14.1617	-6.56154	SFN
742	Pre-NOTCH Processing in Golgi_Homo sapiens_R-HSA-1912420	2018-01-18	0.629185	0.991381	0.599281	0.931998	14.17	-6.5654	NOTCH3
743	Inflammasomes_Homo sapiens_R-HSA-622312	2018-01-17	0.608165	0.985824	0.579502	0.915474	13.2674	-6.59799	AIM2
744	RHO GTPases activate CIT_Homo sapiens_R-HSA-5625900	2018-01-16	0.585955	0.971184	0.558749	0.910343	12.4015	-6.62874	MYL9
745	Acetylcholine Neurotransmitter Release Cycle_Homo sapiens_R-HSA-264642	2018-01-17	0.608165	0.985824	0.579502	0.915474	13.5762	-6.75156	STXBP1
746	TP53 regulates transcription of additional cell cycle genes whose exact role in the p53 pathway remain uncertain_Homo sapiens_R-HSA-6804115	2018-02-21	0.311545	0.901698	0.294217	0.838886	5.82524	-6.79346	CNOT4;PLAGL1
747	Association of licensing factors with the pre-replicative complex_Homo sapiens_R-HSA-69298	2018-01-15	0.562486	0.952053	0.536975	0.893094	12.0156	-6.91366	E2F3
748	VxPx cargo-targeting to cilium_Homo sapiens_R-HSA-5620916	2018-02-21	0.311545	0.901698	0.294217	0.838886	5.94017	-6.92749	EXOC4;ASAP1
749	Platelet sensitization by LDL_Homo sapiens_R-HSA-432142	2018-01-17	0.608165	0.985824	0.579502	0.915474	14.1088	-7.01642	PPP2R5E
750	PKA-mediated phosphorylation of CREB_Homo sapiens_R-HSA-111931	2018-01-17	0.608165	0.985824	0.579502	0.915474	14.2239	-7.07365	PRKAR2B
751	Unblocking of NMDA receptor, glutamate binding and activation_Homo sapiens_R-HSA-438066	2018-02-17	0.230585	0.803755	0.223486	0.754726	4.89941	-7.18811	CAMK2D;GRIN2C
752	Downregulation of ERBB2:ERBB3 signaling_Homo sapiens_R-HSA-1358803	2018-02-13	0.151586	0.688242	0.154565	0.649146	3.81933	-7.20556	NRG1;NRG2
753	Regulation of KIT signaling_Homo sapiens_R-HSA-1433559	2018-01-16	0.585955	0.971184	0.558749	0.910343	13.4892	-7.21017	SOS1
754	Defective B3GALT6 causes EDSP2 and SEMDJL1_Homo sapiens_R-HSA-4420332	2018-02-19	0.271101	0.8401	0.25882	0.794711	5.53773	-7.22819	GPC5;GPC6
755	Defective B3GAT3 causes JDSSDHD_Homo sapiens_R-HSA-3560801	2018-02-19	0.271101	0.8401	0.25882	0.794711	5.55251	-7.24749	GPC5;GPC6
756	Defective B4GALT7 causes EDS, progeroid type_Homo sapiens_R-HSA-3560783	2018-02-19	0.271101	0.8401	0.25882	0.794711	5.57138	-7.27212	GPC5;GPC6
757	FGFR1 ligand binding and activation_Homo sapiens_R-HSA-190242	2018-01-15	0.562486	0.952053	0.536975	0.893094	12.7584	-7.34103	FGF2
758	Formation of Senescence-Associated Heterochromatin Foci (SAHF)_Homo sapiens_R-HSA-2559584	2018-01-17	0.608165	0.985824	0.579502	0.915474	14.7665	-7.34349	HMGA2
759	PKA activation in glucagon signalling_Homo sapiens_R-HSA-164378	2018-01-17	0.608165	0.985824	0.579502	0.915474	14.7718	-7.34612	PRKAR2B
760	Activation of BAD and translocation to mitochondria_Homo sapiens_R-HSA-111447	2018-01-15	0.562486	0.952053	0.536975	0.893094	12.9311	-7.4404	SFN
761	Mitochondrial Fatty Acid Beta-Oxidation_Homo sapiens_R-HSA-77289	2018-01-17	0.608165	0.985824	0.579502	0.915474	14.9619	-7.44066	PCCA
762	Receptor-ligand binding initiates the second proteolytic cleavage of Notch receptor_Homo sapiens_R-HSA-156988	2018-01-14	0.537689	0.943418	0.514129	0.876397	12.4008	-7.69442	NOTCH3
763	Sema3A PAK dependent Axon repulsion_Homo sapiens_R-HSA-399954	2018-01-16	0.585955	0.971184	0.558749	0.910343	14.6298	-7.8198	PLXNA4
764	N-Glycan antennae elongation_Homo sapiens_R-HSA-975577	2018-01-15	0.562486	0.952053	0.536975	0.893094	13.6117	-7.83203	B4GALT6
765	Disorders of transmembrane transporters_Homo sapiens_R-HSA-5619115	2018-01-15	0.562486	0.952053	0.536975	0.893094	13.6522	-7.85531	SFTPD
766	Synthesis of glycosylphosphatidylinositol (GPI)_Homo sapiens_R-HSA-162710	2018-01-16	0.585955	0.971184	0.558749	0.910343	14.8333	-7.9286	PIGC
767	FGFR4 ligand binding and activation_Homo sapiens_R-HSA-190322	2018-01-14	0.537689	0.943418	0.514129	0.876397	12.8236	-7.9567	FGF2
768	DCC mediated attractive signaling_Homo sapiens_R-HSA-418885	2018-01-14	0.537689	0.943418	0.514129	0.876397	12.8927	-7.99961	PTK2
769	CREB phosphorylation through the activation of CaMKII_Homo sapiens_R-HSA-442729	2018-02-15	0.190528	0.71299	0.188585	0.679191	4.85751	-8.05354	CAMK2D;GRIN2C
770	Synthesis of PIPs at the Golgi membrane_Homo sapiens_R-HSA-1660514	2018-02-18	0.250821	0.820092	0.241124	0.787367	5.83376	-8.06817	PI4K2B;TPTE
771	PKA activation_Homo sapiens_R-HSA-163615	2018-01-16	0.585955	0.971184	0.558749	0.910343	15.1107	-8.07686	PRKAR2B
772	Other semaphorin interactions_Homo sapiens_R-HSA-416700	2018-02-19	0.271101	0.8401	0.25882	0.794711	6.23933	-8.14397	SEMA6A;PLXNA4
773	AKT phosphorylates targets in the cytosol_Homo sapiens_R-HSA-198323	2018-01-13	0.511488	0.943418	0.490158	0.876084	12.1781	-8.16455	GSK3B
774	Cell-extracellular matrix interactions_Homo sapiens_R-HSA-446353	2018-01-16	0.585955	0.971184	0.558749	0.910343	15.6633	-8.37223	RSU1
775	Defects in vitamin and cofactor metabolism_Homo sapiens_R-HSA-3296482	2018-02-18	0.250821	0.820092	0.241124	0.787367	6.05928	-8.38006	PCCA;GIF
776	Hyaluronan metabolism_Homo sapiens_R-HSA-2142845	2018-02-17	0.230585	0.803755	0.223486	0.754726	5.72866	-8.40473	CEMIP;STAB2
777	Signaling by NODAL_Homo sapiens_R-HSA-1181150	2018-02-19	0.271101	0.8401	0.25882	0.794711	6.53162	-8.52549	FOXO3;PCSK6
778	Beta-catenin phosphorylation cascade_Homo sapiens_R-HSA-196299	2018-02-17	0.230585	0.803755	0.223486	0.754726	5.84351	-8.57322	GSK3B;PPP2R5E
779	Regulation of IFNG signaling_Homo sapiens_R-HSA-877312	2018-01-14	0.537689	0.943418	0.514129	0.876397	13.8875	-8.61686	PIAS1
780	Eicosanoid ligand-binding receptors_Homo sapiens_R-HSA-391903	2018-01-15	0.562486	0.952053	0.536975	0.893094	15.1455	-8.71455	PTGER3
781	FGFRL1 modulation of FGFR1 signaling_Homo sapiens_R-HSA-5658623	2018-01-13	0.511488	0.943418	0.490158	0.876084	13.1305	-8.8031	FGF2
782	FGFR2c ligand binding and activation_Homo sapiens_R-HSA-190375	2018-01-13	0.511488	0.943418	0.490158	0.876084	13.1339	-8.80541	FGF2
783	Signaling by FGFR4 in disease_Homo sapiens_R-HSA-5655291	2018-02-11	0.11456	0.596461	0.121957	0.587111	4.06525	-8.808	GAB1;SOS1
784	Signaling by FGFR3 fusions in cancer_Homo sapiens_R-HSA-8853334	2018-02-10	0.0970633	0.543781	0.106375	0.536354	3.78904	-8.83752	GAB1;SOS1
785	CRMPs in Sema3A signaling_Homo sapiens_R-HSA-399956	2018-02-16	0.210461	0.768742	0.205955	0.722729	5.69721	-8.87884	GSK3B;PLXNA4
786	Synthesis, secretion, and inactivation of Glucose-dependent Insulinotropic Polypeptide (GIP)_Homo sapiens_R-HSA-400511	2018-02-13	0.151586	0.688242	0.154565	0.649146	4.7235	-8.91138	PCSK1;PAX6
787	Recycling of bile acids and salts_Homo sapiens_R-HSA-159418	2018-02-15	0.190528	0.71299	0.188585	0.679191	5.37854	-8.91738	NCOA1;NCOA2
788	SEMA3A-Plexin repulsion signaling by inhibiting Integrin adhesion_Homo sapiens_R-HSA-399955	2018-01-14	0.537689	0.943418	0.514129	0.876397	14.4018	-8.93599	PLXNA4
789	Activation of Rac_Homo sapiens_R-HSA-428540	2018-01-14	0.537689	0.943418	0.514129	0.876397	14.5713	-9.04114	SOS1
790	AXIN missense mutants destabilize the destruction complex_Homo sapiens_R-HSA-5467340	2018-02-14	0.170871	0.708898	0.171434	0.649146	5.25873	-9.29137	GSK3B;PPP2R5E
791	GRB7 events in ERBB2 signaling_Homo sapiens_R-HSA-1306955	2018-02-05	0.025754	0.292677	0.0394725	0.307436	2.54081	-9.29724	NRG1;NRG2
792	Misspliced GSK3beta mutants stabilize beta-catenin_Homo sapiens_R-HSA-5339716	2018-02-15	0.190528	0.71299	0.188585	0.679191	5.61921	-9.31641	GSK3B;PPP2R5E
793	Bile salt and organic anion SLC transporters_Homo sapiens_R-HSA-425471	2018-02-14	0.170871	0.708898	0.171434	0.649146	5.28229	-9.33299	SLC13A4;SLC16A7
794	FGFR3 ligand binding and activation_Homo sapiens_R-HSA-190239	2018-01-13	0.511488	0.943418	0.490158	0.876084	13.9334	-9.3414	FGF2
795	SHC-related events triggered by IGF1R_Homo sapiens_R-HSA-2428933	2018-02-09	0.0804253	0.493894	0.0913901	0.497453	3.70691	-9.34299	SOS1;IGF1R
796	AMER1 mutants destabilize the destruction complex_Homo sapiens_R-HSA-4839748	2018-02-14	0.170871	0.708898	0.171434	0.649146	5.29161	-9.34946	GSK3B;PPP2R5E
797	phosphorylation site mutants of CTNNB1 are not targeted to the proteasome by the destruction complex_Homo sapiens_R-HSA-4839743	2018-02-15	0.190528	0.71299	0.188585	0.679191	5.67753	-9.4131	GSK3B;PPP2R5E
798	AXIN mutants destabilize the destruction complex, activating WNT signaling_Homo sapiens_R-HSA-4839735	2018-02-14	0.170871	0.708898	0.171434	0.649146	5.34855	-9.45007	GSK3B;PPP2R5E
799	FGFR3c ligand binding and activation_Homo sapiens_R-HSA-190372	2018-01-13	0.511488	0.943418	0.490158	0.876084	14.1617	-9.49446	FGF2
800	APC truncation mutants have impaired AXIN binding_Homo sapiens_R-HSA-5467337	2018-02-14	0.170871	0.708898	0.171434	0.649146	5.37867	-9.50329	GSK3B;PPP2R5E
801	Synthesis of Prostaglandins (PG) and Thromboxanes (TX)_Homo sapiens_R-HSA-2162123	2018-01-14	0.537689	0.943418	0.514129	0.876397	15.3387	-9.51728	AKR1C3
802	S37 mutants of beta-catenin aren't phosphorylated_Homo sapiens_R-HSA-5358749	2018-02-15	0.190528	0.71299	0.188585	0.679191	5.76543	-9.55884	GSK3B;PPP2R5E
803	S45 mutants of beta-catenin aren't phosphorylated_Homo sapiens_R-HSA-5358751	2018-02-15	0.190528	0.71299	0.188585	0.679191	5.79845	-9.61359	GSK3B;PPP2R5E
804	Organic cation/anion/zwitterion transport_Homo sapiens_R-HSA-549132	2018-01-14	0.537689	0.943418	0.514129	0.876397	15.5102	-9.6237	RUNX1
805	NOTCH2 intracellular domain regulates transcription_Homo sapiens_R-HSA-2197563	2018-02-12	0.132777	0.655671	0.138048	0.629761	4.76846	-9.62792	MAML3;MAMLD1
806	Nicotinate metabolism_Homo sapiens_R-HSA-196807	2018-01-14	0.537689	0.943418	0.514129	0.876397	15.5834	-9.66913	NMNAT3
807	T41 mutants of beta-catenin aren't phosphorylated_Homo sapiens_R-HSA-5358752	2018-02-15	0.190528	0.71299	0.188585	0.679191	5.87073	-9.73342	GSK3B;PPP2R5E
808	Truncations of AMER1 destabilize the destruction complex_Homo sapiens_R-HSA-5467348	2018-02-14	0.170871	0.708898	0.171434	0.649146	5.51171	-9.73834	GSK3B;PPP2R5E
809	p130Cas linkage to MAPK signaling for integrins_Homo sapiens_R-HSA-372708	2018-02-15	0.190528	0.71299	0.188585	0.679191	5.8747	-9.74001	RAP1A;PTK2
810	truncated APC mutants destabilize the destruction complex_Homo sapiens_R-HSA-4839744	2018-02-14	0.170871	0.708898	0.171434	0.649146	5.52071	-9.75425	GSK3B;PPP2R5E
811	Tandem pore domain potassium channels_Homo sapiens_R-HSA-1296346	2018-02-12	0.132777	0.655671	0.138048	0.629761	4.83875	-9.76984	KCNK10;KCNK9
812	S33 mutants of beta-catenin aren't phosphorylated_Homo sapiens_R-HSA-5358747	2018-02-15	0.190528	0.71299	0.188585	0.679191	5.89359	-9.77132	GSK3B;PPP2R5E
813	Synthesis of PIPs at the early endosome membrane_Homo sapiens_R-HSA-1660516	2018-02-14	0.170871	0.708898	0.171434	0.649146	5.5755	-9.85105	INPP4B;PI4K2B
814	Negative regulation of TCF-dependent signaling by WNT ligand antagonists_Homo sapiens_R-HSA-3772470	2018-01-15	0.562486	0.952053	0.536975	0.893094	17.1542	-9.87033	LRP6
815	Processive synthesis on the lagging strand_Homo sapiens_R-HSA-69183	2018-01-15	0.562486	0.952053	0.536975	0.893094	17.1999	-9.89662	PRIM2
816	Signal regulatory protein (SIRP) family interactions_Homo sapiens_R-HSA-391160	2018-01-13	0.511488	0.943418	0.490158	0.876084	14.7657	-9.89939	PTK2
817	Fatty acids_Homo sapiens_R-HSA-211935	2018-01-15	0.562486	0.952053	0.536975	0.893094	17.2788	-9.94201	CYP4A22
818	Synthesis of bile acids and bile salts via 24-hydroxycholesterol_Homo sapiens_R-HSA-193775	2018-01-14	0.537689	0.943418	0.514129	0.876397	16.0574	-9.96319	AKR1C3
819	FGFR3 mutant receptor activation_Homo sapiens_R-HSA-2033514	2018-01-12	0.483803	0.932562	0.465007	0.863327	13.7734	-10.0006	FGF2
820	Interleukin-7 signaling_Homo sapiens_R-HSA-1266695	2018-01-11	0.454551	0.920633	0.438619	0.861163	12.7238	-10.032	IL7
821	Signaling by activated point mutants of FGFR3_Homo sapiens_R-HSA-1839130	2018-01-12	0.483803	0.932562	0.465007	0.863327	14.0629	-10.2107	FGF2
822	AKT phosphorylates targets in the nucleus_Homo sapiens_R-HSA-198693	2018-02-09	0.0804253	0.493894	0.0913901	0.497453	4.06829	-10.2538	FOXO3;FOXO1
823	Defective EXT1 causes exostoses 1, TRPS2 and CHDS_Homo sapiens_R-HSA-3656253	2018-02-12	0.132777	0.655671	0.138048	0.629761	5.12378	-10.3454	GPC5;GPC6
824	Diseases of carbohydrate metabolism_Homo sapiens_R-HSA-5663084	2018-01-10	0.423642	0.914075	0.410932	0.851184	12.1193	-10.4088	GYS2
825	Polymerase switching on the C-strand of the telomere_Homo sapiens_R-HSA-174411	2018-01-14	0.537689	0.943418	0.514129	0.876397	16.8037	-10.4263	PRIM2
826	Glycogen storage diseases_Homo sapiens_R-HSA-3229121	2018-01-10	0.423642	0.914075	0.410932	0.851184	12.1889	-10.4686	GYS2
827	Myoclonic epilepsy of Lafora_Homo sapiens_R-HSA-3785653	2018-01-10	0.423642	0.914075	0.410932	0.851184	12.1933	-10.4724	GYS2
828	GP1b-IX-V activation signalling_Homo sapiens_R-HSA-430116	2018-02-10	0.0970633	0.543781	0.106375	0.536354	4.49814	-10.4914	GP1BA;GP5
829	Defective EXT2 causes exostoses 2_Homo sapiens_R-HSA-3656237	2018-02-12	0.132777	0.655671	0.138048	0.629761	5.21235	-10.5242	GPC5;GPC6
830	Leading Strand Synthesis_Homo sapiens_R-HSA-69109	2018-01-14	0.537689	0.943418	0.514129	0.876397	17.1187	-10.6217	PRIM2
831	Polymerase switching_Homo sapiens_R-HSA-69091	2018-01-14	0.537689	0.943418	0.514129	0.876397	17.1733	-10.6556	PRIM2
832	Serotonin receptors_Homo sapiens_R-HSA-390666	2018-02-12	0.132777	0.655671	0.138048	0.629761	5.30806	-10.7174	HTR1F;HTR2A
833	Chk1/Chk2(Cds1) mediated inactivation of Cyclin B:Cdk1 complex_Homo sapiens_R-HSA-75035	2018-01-12	0.483803	0.932562	0.465007	0.863327	14.7982	-10.7447	SFN
834	Retrograde neurotrophin signalling_Homo sapiens_R-HSA-177504	2018-01-13	0.511488	0.943418	0.490158	0.876084	16.4507	-11.0291	DNM3
835	FGFR1c ligand binding and activation_Homo sapiens_R-HSA-190373	2018-01-11	0.454551	0.920633	0.438619	0.861163	14.0882	-11.1078	FGF2
836	Sperm Motility And Taxes_Homo sapiens_R-HSA-1300642	2018-02-09	0.0804253	0.493894	0.0913901	0.497453	4.42372	-11.1497	CATSPER3;CATSPERB
837	Signal attenuation_Homo sapiens_R-HSA-74749	2018-01-10	0.423642	0.914075	0.410932	0.851184	13.0954	-11.2472	SOS1
838	Signaling by activated point mutants of FGFR1_Homo sapiens_R-HSA-1839122	2018-01-11	0.454551	0.920633	0.438619	0.861163	14.293	-11.2693	FGF2
839	Hyaluronan uptake and degradation_Homo sapiens_R-HSA-2160916	2018-01-12	0.483803	0.932562	0.465007	0.863327	15.5431	-11.2855	STAB2
840	Repression of WNT target genes_Homo sapiens_R-HSA-4641265	2018-02-14	0.170871	0.708898	0.171434	0.649146	6.42197	-11.3466	TCF7L2;CTBP2
841	FGFR2b ligand binding and activation_Homo sapiens_R-HSA-190377	2018-01-10	0.423642	0.914075	0.410932	0.851184	13.3175	-11.4379	FGF2
842	Reduction of cytosolic Ca++ levels_Homo sapiens_R-HSA-418359	2018-01-12	0.483803	0.932562	0.465007	0.863327	15.7829	-11.4596	SLC8A3
843	Peptide hormone biosynthesis_Homo sapiens_R-HSA-209952	2018-01-12	0.483803	0.932562	0.465007	0.863327	15.8106	-11.4797	PCSK1
844	Depolarization of the Presynaptic Terminal Triggers the Opening of Calcium Channels_Homo sapiens_R-HSA-112308	2018-02-13	0.151586	0.688242	0.154565	0.649146	6.10484	-11.5174	CACNB4;CACNA2D3
845	CREB phosphorylation_Homo sapiens_R-HSA-199920	2018-01-07	0.320018	0.901698	0.319426	0.842639	10.1681	-11.5853	RPS6KA5
846	TP53 Regulates Transcription of Caspase Activators and Caspases_Homo sapiens_R-HSA-6803207	2018-01-12	0.483803	0.932562	0.465007	0.863327	16.1027	-11.6918	CRADD
847	Sodium/Proton exchangers_Homo sapiens_R-HSA-425986	2018-01-09	0.390985	0.914075	0.381882	0.842639	12.6474	-11.8771	SLC9A2
848	Eicosanoids_Homo sapiens_R-HSA-211979	2018-01-12	0.483803	0.932562	0.465007	0.863327	16.5391	-12.0087	CYP4A22
849	Erythrocytes take up carbon dioxide and release oxygen_Homo sapiens_R-HSA-1237044	2018-01-12	0.483803	0.932562	0.465007	0.863327	16.7645	-12.1723	CA1
850	alpha-linolenic (omega3) and linoleic (omega6) acid metabolism_Homo sapiens_R-HSA-2046104	2018-01-13	0.511488	0.943418	0.490158	0.876084	18.168	-12.1804	ELOVL2
851	Removal of the Flap Intermediate_Homo sapiens_R-HSA-69166	2018-01-14	0.537689	0.943418	0.514129	0.876397	19.6522	-12.1937	PRIM2
852	alpha-linolenic acid (ALA) metabolism_Homo sapiens_R-HSA-2046106	2018-01-13	0.511488	0.943418	0.490158	0.876084	18.3112	-12.2764	ELOVL2
853	Diseases associated with surfactant metabolism_Homo sapiens_R-HSA-5687613	2018-01-10	0.423642	0.914075	0.410932	0.851184	14.3785	-12.3492	SFTPD
854	Sodium/Calcium exchangers_Homo sapiens_R-HSA-425561	2018-02-11	0.11456	0.596461	0.121957	0.587111	5.70332	-12.3571	SLC8A3;SLC24A3
855	RSK activation_Homo sapiens_R-HSA-444257	2018-01-06	0.281495	0.8401	0.285876	0.832429	9.78131	-12.3992	RPS6KA6
856	O2/CO2 exchange in erythrocytes_Homo sapiens_R-HSA-1480926	2018-01-12	0.483803	0.932562	0.465007	0.863327	17.319	-12.5749	CA1
857	SUMOylation of transcription factors_Homo sapiens_R-HSA-3232118	2018-01-14	0.537689	0.943418	0.514129	0.876397	20.4404	-12.6827	PIAS1
858	Miscellaneous substrates_Homo sapiens_R-HSA-211958	2018-01-12	0.483803	0.932562	0.465007	0.863327	17.6607	-12.823	CYP4A22
859	Lysine catabolism_Homo sapiens_R-HSA-71064	2018-01-12	0.483803	0.932562	0.465007	0.863327	17.7514	-12.8889	SLC25A21
860	CLEC7A (Dectin-1) induces NFAT activation_Homo sapiens_R-HSA-5607763	2018-01-11	0.454551	0.920633	0.438619	0.861163	16.4012	-12.9315	NFATC2
861	GABA A receptor activation_Homo sapiens_R-HSA-977441	2018-01-13	0.511488	0.943418	0.490158	0.876084	19.3697	-12.9861	GABRB1
862	RHO GTPases activate IQGAPs_Homo sapiens_R-HSA-5626467	2018-01-11	0.454551	0.920633	0.438619	0.861163	16.7253	-13.187	CDH1
863	POU5F1 (OCT4), SOX2, NANOG activate genes related to proliferation_Homo sapiens_R-HSA-2892247	2018-02-13	0.151586	0.688242	0.154565	0.649146	7.04059	-13.2828	NR6A1;FGF2
864	EGFR Transactivation by Gastrin_Homo sapiens_R-HSA-2179392	2018-01-09	0.390985	0.914075	0.381882	0.842639	14.1547	-13.2925	SOS1
865	Signaling by NOTCH3_Homo sapiens_R-HSA-1980148	2018-01-11	0.454551	0.920633	0.438619	0.861163	16.9489	-13.3633	NOTCH3
866	Purine salvage_Homo sapiens_R-HSA-74217	2018-01-13	0.511488	0.943418	0.490158	0.876084	20.06	-13.4489	ADK
867	Defects in cobalamin (B12) metabolism_Homo sapiens_R-HSA-3296469	2018-01-11	0.454551	0.920633	0.438619	0.861163	17.3421	-13.6733	GIF
868	ABC transporter disorders_Homo sapiens_R-HSA-5619084	2018-01-08	0.356478	0.913117	0.351404	0.842639	13.2708	-13.6887	SFTPD
869	Inhibition of replication initiation of damaged DNA by RB1/E2F1_Homo sapiens_R-HSA-113501	2018-01-12	0.483803	0.932562	0.465007	0.863327	18.9755	-13.7777	PRIM2
870	GLI proteins bind promoters of Hh responsive genes to promote transcription_Homo sapiens_R-HSA-5635851	2018-02-07	0.0503541	0.372921	0.0636054	0.408953	4.63664	-13.8574	HHIP;GLI2
871	Netrin mediated repulsion signals_Homo sapiens_R-HSA-418886	2018-01-10	0.423642	0.914075	0.410932	0.851184	16.1689	-13.8869	PTK2
872	Dermatan sulfate biosynthesis_Homo sapiens_R-HSA-2022923	2018-01-11	0.454551	0.920633	0.438619	0.861163	17.9472	-14.1504	UST
873	Calcitonin-like ligand receptors_Homo sapiens_R-HSA-419812	2018-01-10	0.423642	0.914075	0.410932	0.851184	16.5262	-14.1938	CALCB
874	Prostanoid ligand receptors_Homo sapiens_R-HSA-391908	2018-01-09	0.390985	0.914075	0.381882	0.842639	15.1221	-14.201	PTGER3
875	Inositol transporters_Homo sapiens_R-HSA-429593	2018-02-07	0.0503541	0.372921	0.0636054	0.408953	4.76664	-14.2459	SLC5A9;SLC2A13
876	Gamma-carboxylation, transport, and amino-terminal cleavage of proteins_Homo sapiens_R-HSA-159854	2018-01-11	0.454551	0.920633	0.438619	0.861163	18.1814	-14.3351	PROS1
877	Gap junction degradation_Homo sapiens_R-HSA-190873	2018-01-10	0.423642	0.914075	0.410932	0.851184	17.26	-14.824	MYO6
878	Synthesis of PIPs at the late endosome membrane_Homo sapiens_R-HSA-1660517	2018-01-10	0.423642	0.914075	0.410932	0.851184	17.3145	-14.8709	MTMR7
879	Nef and signal transduction_Homo sapiens_R-HSA-164944	2018-01-08	0.356478	0.913117	0.351404	0.842639	14.4327	-14.8871	ELMO1
880	Reversible hydration of carbon dioxide_Homo sapiens_R-HSA-1475029	2018-01-12	0.483803	0.932562	0.465007	0.863327	20.5483	-14.9197	CA1
881	Apoptotic cleavage of cell adhesion proteins_Homo sapiens_R-HSA-351906	2018-01-11	0.454551	0.920633	0.438619	0.861163	19.4161	-15.3085	CDH1
882	Gamma-carboxylation of protein precursors_Homo sapiens_R-HSA-159740	2018-01-10	0.423642	0.914075	0.410932	0.851184	17.8483	-15.3293	PROS1
883	Physiological factors_Homo sapiens_R-HSA-5578768	2018-01-12	0.483803	0.932562	0.465007	0.863327	21.1848	-15.3818	HIPK2
884	Role of second messengers in netrin-1 signaling_Homo sapiens_R-HSA-418890	2018-02-10	0.0970633	0.543781	0.106375	0.536354	6.67747	-15.5745	TRPC5;TRPC6
885	VEGF binds to VEGFR leading to receptor dimerization_Homo sapiens_R-HSA-195399	2018-01-08	0.356478	0.913117	0.351404	0.842639	15.1468	-15.6237	VEGFC
886	Removal of aminoterminal propeptides from gamma-carboxylated proteins_Homo sapiens_R-HSA-159782	2018-01-10	0.423642	0.914075	0.410932	0.851184	18.2415	-15.667	PROS1
887	CDC6 association with the ORC:origin complex_Homo sapiens_R-HSA-68689	2018-01-11	0.454551	0.920633	0.438619	0.861163	19.8895	-15.6818	E2F3
888	VEGF ligand-receptor interactions_Homo sapiens_R-HSA-194313	2018-01-08	0.356478	0.913117	0.351404	0.842639	15.3858	-15.8702	VEGFC
889	Ligand-receptor interactions_Homo sapiens_R-HSA-5632681	2018-01-08	0.356478	0.913117	0.351404	0.842639	15.5131	-16.0015	HHIP
890	Creatine metabolism_Homo sapiens_R-HSA-71288	2018-01-10	0.423642	0.914075	0.410932	0.851184	19.003	-16.321	CKMT2
891	G2 Phase_Homo sapiens_R-HSA-68911	2018-01-05	0.240791	0.803755	0.250675	0.787367	11.5164	-16.3973	E2F3
892	Transport of organic anions_Homo sapiens_R-HSA-879518	2018-01-11	0.454551	0.920633	0.438619	0.861163	21.0204	-16.5734	SLCO3A1
893	Alpha-defensins_Homo sapiens_R-HSA-1462054	2018-01-09	0.390985	0.914075	0.381882	0.842639	17.7204	-16.641	PRSS3
894	Defective CSF2RA causes pulmonary surfactant metabolism dysfunction 4 (SMDP4)_Homo sapiens_R-HSA-5688890	2018-01-08	0.356478	0.913117	0.351404	0.842639	16.1942	-16.704	SFTPD
895	Transport of gamma-carboxylated protein precursors from the endoplasmic reticulum to the Golgi apparatus_Homo sapiens_R-HSA-159763	2018-01-09	0.390985	0.914075	0.381882	0.842639	17.8453	-16.7583	PROS1
896	Defective CSF2RB causes pulmonary surfactant metabolism dysfunction 5 (SMDP5)_Homo sapiens_R-HSA-5688849	2018-01-08	0.356478	0.913117	0.351404	0.842639	16.435	-16.9524	SFTPD
897	Synthesis of IP2, IP, and Ins in the cytosol_Homo sapiens_R-HSA-1855183	2018-01-11	0.454551	0.920633	0.438619	0.861163	21.8973	-17.2649	INPP4B
898	Biotin transport and metabolism_Homo sapiens_R-HSA-196780	2018-01-11	0.454551	0.920633	0.438619	0.861163	21.9684	-17.3209	PCCA
899	Interaction With The Zona Pellucida_Homo sapiens_R-HSA-1300644	2018-01-10	0.423642	0.914075	0.410932	0.851184	20.2301	-17.375	ADAM20
900	Nef mediated downregulation of MHC class I complex cell surface expression_Homo sapiens_R-HSA-164940	2018-01-10	0.423642	0.914075	0.410932	0.851184	20.2528	-17.3944	PACS1
901	Relaxin receptors_Homo sapiens_R-HSA-444821	2018-01-08	0.356478	0.913117	0.351404	0.842639	17.0281	-17.5642	RXFP2
902	Type I hemidesmosome assembly_Homo sapiens_R-HSA-446107	2018-01-09	0.390985	0.914075	0.381882	0.842639	18.9422	-17.7884	ITGB4
903	Glycerophospholipid catabolism_Homo sapiens_R-HSA-6814848	2018-01-07	0.320018	0.901698	0.319426	0.842639	15.6348	-17.8139	GDPD1
904	A third proteolytic cleavage releases NICD_Homo sapiens_R-HSA-157212	2018-01-09	0.390985	0.914075	0.381882	0.842639	19.3514	-18.1726	NOTCH3
905	Cation-coupled Chloride cotransporters_Homo sapiens_R-HSA-426117	2018-01-07	0.320018	0.901698	0.319426	0.842639	16.0011	-18.2313	SLC12A1
906	Diseases associated with visual transduction_Homo sapiens_R-HSA-2474795	2018-01-09	0.390985	0.914075	0.381882	0.842639	19.429	-18.2455	RBP1
907	Reactions specific to the complex N-glycan synthesis pathway_Homo sapiens_R-HSA-975578	2018-01-10	0.423642	0.914075	0.410932	0.851184	21.355	-18.3411	FUT8
908	Terminal pathway of complement_Homo sapiens_R-HSA-166665	2018-01-08	0.356478	0.913117	0.351404	0.842639	17.9888	-18.5552	C9
909	Conjugation of salicylate with glycine_Homo sapiens_R-HSA-177128	2018-01-08	0.356478	0.913117	0.351404	0.842639	17.9969	-18.5635	GLYATL1
910	Retinoid cycle disease events_Homo sapiens_R-HSA-2453864	2018-01-09	0.390985	0.914075	0.381882	0.842639	19.8314	-18.6234	RBP1
911	Muscarinic acetylcholine receptors_Homo sapiens_R-HSA-390648	2018-02-05	0.025754	0.292677	0.0394725	0.307436	5.16902	-18.9143	CHRM2;CHRM3
912	Synthesis of epoxy (EET) and dihydroxyeicosatrienoic acids (DHET)_Homo sapiens_R-HSA-2142670	2018-01-08	0.356478	0.913117	0.351404	0.842639	18.4026	-18.982	EPHX2
913	Bicarbonate transporters_Homo sapiens_R-HSA-425381	2018-01-09	0.390985	0.914075	0.381882	0.842639	20.3819	-19.1403	SLC4A4
914	Organic cation transport_Homo sapiens_R-HSA-549127	2018-01-09	0.390985	0.914075	0.381882	0.842639	20.4954	-19.247	RUNX1
915	Opsins_Homo sapiens_R-HSA-419771	2018-01-09	0.390985	0.914075	0.381882	0.842639	20.9179	-19.6438	RRH
916	Insulin-like Growth Factor-2 mRNA Binding Proteins (IGF2BPs/IMPs/VICKZs) bind RNA_Homo sapiens_R-HSA-428359	2018-01-08	0.356478	0.913117	0.351404	0.842639	19.129	-19.7312	IGF2BP2
917	Conjugation of benzoate with glycine_Homo sapiens_R-HSA-177135	2018-01-06	0.281495	0.8401	0.285876	0.832429	15.7489	-19.964	GLYATL1
918	Amino Acid conjugation_Homo sapiens_R-HSA-156587	2018-01-09	0.390985	0.914075	0.381882	0.842639	21.3212	-20.0225	GLYATL1
919	Conjugation of carboxylic acids_Homo sapiens_R-HSA-159424	2018-01-09	0.390985	0.914075	0.381882	0.842639	21.3456	-20.0453	GLYATL1
920	Na+-dependent glucose transporters_Homo sapiens_R-HSA-428808	2018-01-05	0.240791	0.803755	0.250675	0.787367	14.1314	-20.1207	SLC5A9
921	Interleukin-19, 20, 22, 24_Homo sapiens_R-HSA-8854691	2018-01-09	0.390985	0.914075	0.381882	0.842639	21.4327	-20.1272	IL24
922	Linoleic acid (LA) metabolism_Homo sapiens_R-HSA-2046105	2018-01-08	0.356478	0.913117	0.351404	0.842639	19.6473	-20.2659	ELOVL2
923	FGFR1b ligand binding and activation_Homo sapiens_R-HSA-190370	2018-01-06	0.281495	0.8401	0.285876	0.832429	16.1924	-20.5261	FGF2
924	RNF mutants show enhanced WNT signaling and proliferation_Homo sapiens_R-HSA-5340588	2018-02-08	0.0647997	0.431098	0.0770988	0.47045	7.50807	-20.5455	RNF43;LRP6
925	Thyroxine biosynthesis_Homo sapiens_R-HSA-209968	2018-01-10	0.423642	0.914075	0.410932	0.851184	23.9291	-20.5519	DIO1
926	Regulation of cytoskeletal remodeling and cell spreading by IPP complex components_Homo sapiens_R-HSA-446388	2018-01-08	0.356478	0.913117	0.351404	0.842639	20.6198	-21.2689	RSU1
927	Negative feedback regulation of MAPK pathway_Homo sapiens_R-HSA-5674499	2018-01-06	0.281495	0.8401	0.285876	0.832429	16.9573	-21.4957	BRAF
928	Defective ABCA3 causes pulmonary surfactant metabolism dysfunction type 3 (SMDP3)_Homo sapiens_R-HSA-5683678	2018-01-05	0.240791	0.803755	0.250675	0.787367	15.562	-22.1576	SFTPD
929	Binding of TCF/LEF:CTNNB1 to target gene promoters_Homo sapiens_R-HSA-4411364	2018-01-07	0.320018	0.901698	0.319426	0.842639	20.3873	-23.2289	TCF7L2
930	Protein repair_Homo sapiens_R-HSA-5676934	2018-01-06	0.281495	0.8401	0.285876	0.832429	18.44	-23.3753	MSRA
931	WNT mediated activation of DVL_Homo sapiens_R-HSA-201688	2018-01-08	0.356478	0.913117	0.351404	0.842639	22.7721	-23.489	PIP5K1B
932	Erythrocytes take up oxygen and release carbon dioxide_Homo sapiens_R-HSA-1247673	2018-01-08	0.356478	0.913117	0.351404	0.842639	22.9659	-23.6889	CA1
933	PKA-mediated phosphorylation of key metabolic factors_Homo sapiens_R-HSA-163358	2018-01-05	0.240791	0.803755	0.250675	0.787367	17.1155	-24.3695	PFKFB1
934	Tachykinin receptors bind tachykinins_Homo sapiens_R-HSA-380095	2018-01-05	0.240791	0.803755	0.250675	0.787367	17.1652	-24.4403	TACR1
935	NrCAM interactions_Homo sapiens_R-HSA-447038	2018-01-07	0.320018	0.901698	0.319426	0.842639	21.4982	-24.4945	CNTN2
936	DNA Damage Reversal_Homo sapiens_R-HSA-73942	2018-01-06	0.281495	0.8401	0.285876	0.832429	19.8074	-25.1087	MGMT
937	Neurofascin interactions_Homo sapiens_R-HSA-447043	2018-01-07	0.320018	0.901698	0.319426	0.842639	22.0597	-25.1344	NFASC
938	Multifunctional anion exchangers_Homo sapiens_R-HSA-427601	2018-01-07	0.320018	0.901698	0.319426	0.842639	22.3759	-25.4946	SLC26A4
939	Proton-coupled monocarboxylate transport_Homo sapiens_R-HSA-433692	2018-01-06	0.281495	0.8401	0.285876	0.832429	21.3172	-27.0226	SLC16A7
940	Lectin pathway of complement activation_Homo sapiens_R-HSA-166662	2018-01-06	0.281495	0.8401	0.285876	0.832429	21.6885	-27.4933	MASP2
941	Release of Hh-Np from the secreting cell_Homo sapiens_R-HSA-5362798	2018-01-08	0.356478	0.913117	0.351404	0.842639	26.7256	-27.567	GPC5
942	Ubiquinol biosynthesis_Homo sapiens_R-HSA-2142789	2018-01-07	0.320018	0.901698	0.319426	0.842639	24.4248	-27.829	PDSS2
943	PP2A-mediated dephosphorylation of key metabolic factors_Homo sapiens_R-HSA-163767	2018-01-07	0.320018	0.901698	0.319426	0.842639	24.8083	-28.266	PFKFB1
944	Acyl chain remodeling of CL_Homo sapiens_R-HSA-1482798	2018-01-06	0.281495	0.8401	0.285876	0.832429	22.5106	-28.5353	LCLAT1
945	Defective HLCS causes multiple carboxylase deficiency_Homo sapiens_R-HSA-3371599	2018-01-07	0.320018	0.901698	0.319426	0.842639	25.5386	-29.0981	PCCA
946	Defects in biotin (Btn) metabolism_Homo sapiens_R-HSA-3323169	2018-01-07	0.320018	0.901698	0.319426	0.842639	26.0196	-29.6461	PCCA
947	Ficolins bind to repetitive carbohydrate structures on the target cell surface_Homo sapiens_R-HSA-2855086	2018-01-05	0.240791	0.803755	0.250675	0.787367	21.088	-30.0256	MASP2
948	GDP-fucose biosynthesis_Homo sapiens_R-HSA-6787639	2018-01-06	0.281495	0.8401	0.285876	0.832429	24.5733	-31.1501	GMDS
949	N-glycan trimming and elongation in the cis-Golgi_Homo sapiens_R-HSA-964739	2018-01-05	0.240791	0.803755	0.250675	0.787367	22.3404	-31.8089	MAN1C1
950	Pre-NOTCH Processing in the Endoplasmic Reticulum_Homo sapiens_R-HSA-1912399	2018-01-06	0.281495	0.8401	0.285876	0.832429	25.5671	-32.4099	NOTCH3
951	DNA replication initiation_Homo sapiens_R-HSA-68952	2018-01-06	0.281495	0.8401	0.285876	0.832429	27.1004	-34.3536	PRIM2
952	Molybdenum cofactor biosynthesis_Homo sapiens_R-HSA-947581	2018-01-06	0.281495	0.8401	0.285876	0.832429	27.3619	-34.685	GPHN
953	Telomere C-strand synthesis initiation_Homo sapiens_R-HSA-174430	2018-01-06	0.281495	0.8401	0.285876	0.832429	28.2233	-35.7771	PRIM2
954	NOSTRIN mediated eNOS trafficking_Homo sapiens_R-HSA-203641	2018-01-05	0.240791	0.803755	0.250675	0.787367	25.4598	-36.2503	NOSTRIN
955	PTK6 Regulates Proteins Involved in RNA Processing_Homo sapiens_R-HSA-8849468	2018-01-05	0.240791	0.803755	0.250675	0.787367	30.2749	-43.1061	KHDRBS2
956	Propionyl-CoA catabolism_Homo sapiens_R-HSA-71032	2018-01-05	0.240791	0.803755	0.250675	0.787367	32.7458	-46.6243	PCCA
957	Hyaluronan biosynthesis and export_Homo sapiens_R-HSA-2142850	2018-01-05	0.240791	0.803755	0.250675	0.787367	35.5759	-50.6539	CEMIP
958	Sodium-coupled sulphate, di- and tri-carboxylate transporters_Homo sapiens_R-HSA-433137	2018-01-05	0.240791	0.803755	0.250675	0.787367	38.5031	-54.8218	SLC13A4

## Sheet: Mtb_3d
	Term	Overlap	P.value	Adjusted.P.value	Old.P.value	Old.Adjusted.P.value	Z.score	Combined.Score	Genes
1	Interferon Signaling_Homo sapiens_R-HSA-913531	30/196	6.73477e-21	3.48861e-18	1.87722e-18	9.724e-16	-2.10278	97.6678	SP100;UBE2L6;ADAR;IFI35;SAMHD1;USP18;OASL;HERC5;MT2A;TRIM25;GBP1;TRIM21;GBP4;RSAD2;STAT1;DDX58;MX2;STAT2;MX1;EIF2AK2;ISG15;PML;ISG20;IFI27;OAS1;OAS2;OAS3;TRIM14;XAF1;TRIM31
2	Interferon alpha/beta signaling_Homo sapiens_R-HSA-909733	17/68	4.15354e-16	1.07577e-13	7.42667e-14	1.92351e-11	-1.8553	65.7098	RSAD2;STAT1;MX2;STAT2;MX1;ADAR;ISG15;IFI35;SAMHD1;USP18;OASL;ISG20;OAS1;IFI27;OAS2;OAS3;XAF1
3	Cytokine Signaling in Immune system_Homo sapiens_R-HSA-1280215	38/620	1.33347e-12	1.72685e-10	3.48399e-11	4.51177e-09	-2.37801	65.0225	SP100;PDGFB;UBE2L6;ADAR;IFI35;SAMHD1;USP18;TNFSF13B;OASL;HERC5;MT2A;TRIM25;LGALS9;GBP1;TRIM21;GBP4;TNFSF18;RSAD2;STAT1;IL15;DDX58;MX2;STAT2;MX1;EIF2AK2;ISG15;IL17RD;PRLR;PML;ISG20;KITLG;IFI27;OAS1;OAS2;OAS3;TRIM14;XAF1;TRIM31
4	Immune System_Homo sapiens_R-HSA-168256	65/1547	4.33612e-13	7.48703e-11	7.01807e-12	1.21179e-09	-2.21529	63.0618	CD80;ADAR;UBE2L6;IFI35;TNFSF13B;OASL;HERC5;IFIH1;MT2A;DHX58;TRIM69;TRIM25;LGALS9;TRIM21;HERC6;ZBP1;RSAD2;DTX3L;IL15;DDX58;PRKCA;FOS;IL17RD;PRLR;CLEC4C;OAS1;IFI27;OAS2;OAS3;KLRF1;TRIM14;TLR3;C1QB;SP100;PDGFB;NLRC5;LILRA1;CD1C;SAMHD1;USP18;LILRA4;RNF213;IFI16;CD19;GBP1;GBP4;TNFSF18;STAT1;STAT2;MX2;MX1;EIF2AK2;ISG15;LILRB2;PML;MAPK10;ISG20;MOV10;KITLG;TRIM36;SIGLEC1;TRIM31;XAF1;CD22;LGMN
5	Interferon gamma signaling_Homo sapiens_R-HSA-877300	14/93	2.58328e-10	2.67628e-08	4.67665e-09	4.84501e-07	-1.7518	38.6742	SP100;STAT1;PML;OASL;MT2A;OAS1;OAS2;OAS3;TRIM14;TRIM25;TRIM31;GBP1;TRIM21;GBP4
6	Antiviral mechanism by IFN-stimulated genes_Homo sapiens_R-HSA-1169410	1972-10-01	2.13033e-07	1.57644e-05	1.57316e-06	0.000116414	-2.06035	31.6507	HERC5;STAT1;DDX58;MX2;MX1;EIF2AK2;TRIM25;UBE2L6;ISG15;USP18
7	ISG15 antiviral mechanism_Homo sapiens_R-HSA-1169408	1972-10-01	2.13033e-07	1.57644e-05	1.57316e-06	0.000116414	-2.05011	31.4935	HERC5;STAT1;DDX58;MX2;MX1;EIF2AK2;TRIM25;UBE2L6;ISG15;USP18
8	Negative regulators of RIG-I/MDA5 signaling_Homo sapiens_R-HSA-936440	1934-07-01	9.33246e-07	6.04277e-05	6.30194e-06	0.000408051	-1.89144	26.2618	IFIH1;HERC5;DDX58;NLRC5;TRIM25;ISG15;UBE2L6
9	RIG-I/MDA5 mediated induction of IFN-alpha/beta pathways_Homo sapiens_R-HSA-168928	1979-08-01	3.82933e-05	0.00220399	0.000140467	0.00808464	-1.89259	19.2481	HERC5;IFIH1;DDX58;DHX58;NLRC5;TRIM25;UBE2L6;ISG15
10	Innate Immune System_Homo sapiens_R-HSA-168249	24/807	0.00276933	0.110347	0.0105663	0.390952	-2.32262	13.6782	ZBP1;C1QB;DDX58;CD80;PDGFB;NLRC5;UBE2L6;ISG15;PRKCA;FOS;IL17RD;MAPK10;HERC5;IFIH1;MOV10;KITLG;CLEC4C;IFI16;CD19;DHX58;TRIM25;TRIM21;TLR3;LGMN
11	NF-kB activation through FADD/RIP-1 pathway mediated by caspase-8 and -10_Homo sapiens_R-HSA-933543	2018-03-12	0.000801974	0.0415423	0.00209285	0.10841	-1.76822	12.6046	IFIH1;DDX58;TRIM25
12	Immunoregulatory interactions between a Lymphoid and a non-Lymphoid cell_Homo sapiens_R-HSA-198933	8/157	0.00384295	0.142189	0.00869946	0.34664	-1.9063	10.6019	CD19;KLRF1;LILRB2;SIGLEC1;LILRA1;CD1C;CD22;LILRA4
13	TRAF3-dependent IRF activation pathway_Homo sapiens_R-HSA-918233	2018-03-14	0.00129577	0.0610189	0.00304793	0.14353	-1.5231	10.1266	IFIH1;DDX58;TRIM25
14	STING mediated induction of host immune responses_Homo sapiens_R-HSA-1834941	2018-03-16	0.00194679	0.0840362	0.0042326	0.182707	-1.59322	9.94423	ZBP1;IFI16;TRIM21
15	TRAF6 mediated NF-kB activation_Homo sapiens_R-HSA-933542	2018-03-24	0.00640212	0.207096	0.011528	0.397965	-1.95464	9.87315	IFIH1;DDX58;TRIM25
16	Adaptive Immune System_Homo sapiens_R-HSA-1280218	21/762	0.0113509	0.27704	0.0341408	0.508078	-2.11339	9.46471	DTX3L;CD80;PDGFB;UBE2L6;LILRB2;LILRA1;CD1C;LILRA4;HERC5;MOV10;KITLG;RNF213;CD19;KLRF1;TRIM69;TRIM36;SIGLEC1;TRIM21;CD22;LGMN;HERC6
17	EPH-ephrin mediated repulsion of cells_Homo sapiens_R-HSA-3928665	1948-04-01	0.0071964	0.207096	0.0130606	0.397965	-1.866	9.20719	EPHA7;EFNA5;EPHB2;EPHB1
18	Degradation of the extracellular matrix_Homo sapiens_R-HSA-1474228	6/106	0.00717456	0.207096	0.01411	0.406053	-1.85797	9.17321	CAPN8;MMP13;MMP3;CAPN2;A2M;NID1
19	Termination of translesion DNA synthesis_Homo sapiens_R-HSA-5656169	2018-03-30	0.0119689	0.27704	0.0199165	0.491274	-1.85464	8.20761	TRIM25;ISG15;UBE2L6
20	Regulation of IFNA signaling_Homo sapiens_R-HSA-912694	2018-03-25	0.00719006	0.207096	0.0127471	0.397965	-1.6364	8.07572	STAT1;STAT2;USP18
21	Ca2+ pathway_Homo sapiens_R-HSA-4086398	1961-04-01	0.0164307	0.293486	0.0274259	0.498233	-1.93908	7.96692	MOV10;GNGT2;PRKCA;GNG12
22	Extracellular matrix organization_Homo sapiens_R-HSA-1474244	10/283	0.0161742	0.293486	0.0343032	0.508078	-1.9097	7.87627	CAPN8;VCAN;BMP10;MMP13;MMP3;PDGFB;CAPN2;PRKCA;A2M;NID1
23	Chemokine receptors bind chemokines_Homo sapiens_R-HSA-380108	1956-04-01	0.012301	0.27704	0.021123	0.497351	-1.7234	7.57966	CX3CR1;CXCL9;CCL19;CCR5
24	Constitutive Signaling by Aberrant PI3K in Cancer_Homo sapiens_R-HSA-2219530	1961-04-01	0.0164307	0.293486	0.0274259	0.498233	-1.69658	6.97058	KITLG;CD80;CD19;PDGFB
25	Rho GTPase cycle_Homo sapiens_R-HSA-194840	6/122	0.0137782	0.293486	0.0254852	0.498233	-1.62351	6.95622	MCF2;CHN1;ARHGAP26;A2M;ARHGAP24;FGD2
26	TRAF6 mediated IRF7 activation_Homo sapiens_R-HSA-933541	1932-03-01	0.0142839	0.293486	0.0232912	0.498233	-1.62463	6.90242	IFIH1;DDX58;TRIM25
27	Translesion synthesis by Y family DNA polymerases bypasses lesions on DNA template_Homo sapiens_R-HSA-110313	1937-03-01	0.0211087	0.325072	0.032998	0.508078	-1.73043	6.67612	TRIM25;ISG15;UBE2L6
28	Gastrin-CREB signalling pathway via PKC and MAPK_Homo sapiens_R-HSA-881907	12/432	0.0461838	0.384564	0.0925454	0.563261	-2.08544	6.41298	P2RY6;KITLG;GNGT2;PMCH;MMP3;PDGFB;PRKCA;IL17RD;GNG12;HCRTR2;TRHR;DGKH
29	Cytosolic sensors of pathogen-associated DNA_Homo sapiens_R-HSA-1834949	1966-04-01	0.0213368	0.325072	0.0347411	0.508078	-1.62762	6.26198	ZBP1;IFI16;TRIM21;TLR3
30	Stimuli-sensing channels_Homo sapiens_R-HSA-2672351	5/100	0.0222993	0.326983	0.0377898	0.529057	-1.63157	6.20519	CLCN4;MCOLN2;SLC9C1;ANO2;SLC9C2
31	G alpha (q) signalling events_Homo sapiens_R-HSA-416476	7/191	0.034415	0.384564	0.0607267	0.554494	-1.78479	6.01342	P2RY6;GNGT2;PMCH;GNG12;HCRTR2;TRHR;DGKH
32	Activation of the AP-1 family of transcription factors_Homo sapiens_R-HSA-450341	2018-02-10	0.0105501	0.273248	0.0181481	0.470035	-1.24901	5.68503	MAPK10;FOS
33	EGFR Transactivation by Gastrin_Homo sapiens_R-HSA-2179392	2018-02-09	0.00852968	0.232546	0.0152987	0.417091	-1.1771	5.60795	MMP3;PRKCA
34	Peptide ligand-binding receptors_Homo sapiens_R-HSA-375276	7/193	0.036097	0.384564	0.0633932	0.554494	-1.64274	5.45643	CX3CR1;CXCL9;PMCH;CCL19;CCR5;HCRTR2;TRHR
35	PI-3K cascade:FGFR1_Homo sapiens_R-HSA-5654689	5/122	0.046476	0.384564	0.0736042	0.554494	-1.70946	5.24602	MOV10;KITLG;CD80;CD19;PDGFB
36	PI-3K cascade:FGFR2_Homo sapiens_R-HSA-5654695	5/122	0.046476	0.384564	0.0736042	0.554494	-1.70134	5.22111	MOV10;KITLG;CD80;CD19;PDGFB
37	PI-3K cascade:FGFR3_Homo sapiens_R-HSA-5654710	5/122	0.046476	0.384564	0.0736042	0.554494	-1.6922	5.19305	MOV10;KITLG;CD80;CD19;PDGFB
38	G alpha (12/13) signalling events_Homo sapiens_R-HSA-416482	1975-04-01	0.0322232	0.384564	0.0505056	0.554494	-1.50848	5.18172	GNGT2;MCF2;GNG12;FGD2
39	PI-3K cascade:FGFR4_Homo sapiens_R-HSA-5654720	5/122	0.046476	0.384564	0.0736042	0.554494	-1.68456	5.16961	MOV10;KITLG;CD80;CD19;PDGFB
40	PI3K events in ERBB4 signaling_Homo sapiens_R-HSA-1250342	5/122	0.046476	0.384564	0.0736042	0.554494	-1.6732	5.13473	MOV10;KITLG;CD80;CD19;PDGFB
41	PIP3 activates AKT signaling_Homo sapiens_R-HSA-1257604	5/122	0.046476	0.384564	0.0736042	0.554494	-1.66737	5.11687	MOV10;KITLG;CD80;CD19;PDGFB
42	PI5P, PP2A and IER3 Regulate PI3K/AKT Signaling_Homo sapiens_R-HSA-6811558	1983-04-01	0.0441887	0.384564	0.0673091	0.554494	-1.61413	5.03494	KITLG;CD80;CD19;PDGFB
43	GAB1 signalosome_Homo sapiens_R-HSA-180292	5/125	0.0506371	0.384564	0.0795566	0.554494	-1.67599	4.99959	MOV10;KITLG;CD80;CD19;PDGFB
44	G alpha (z) signalling events_Homo sapiens_R-HSA-418597	1946-03-01	0.0371536	0.384564	0.0549343	0.554494	-1.51365	4.98398	GNGT2;PRKCA;GNG12
45	NOTCH2 intracellular domain regulates transcription_Homo sapiens_R-HSA-2197563	2018-02-12	0.0151508	0.293486	0.0244533	0.498233	-1.18897	4.98142	MAML2;GZMB
46	PI3K/AKT activation_Homo sapiens_R-HSA-198203	5/125	0.0506371	0.384564	0.0795566	0.554494	-1.66216	4.95835	MOV10;KITLG;CD80;CD19;PDGFB
47	DNA Damage Bypass_Homo sapiens_R-HSA-73893	1946-03-01	0.0371536	0.384564	0.0549343	0.554494	-1.46942	4.83836	TRIM25;ISG15;UBE2L6
48	Neuronal System_Homo sapiens_R-HSA-112316	9/301	0.0538659	0.384564	0.0970765	0.563261	-1.65535	4.83571	CHRNB2;KCNV2;GNGT2;SYT1;KCNK13;PRKCA;GNG12;SYN2;GRIA3
49	Transmission across Chemical Synapses_Homo sapiens_R-HSA-112315	7/211	0.0536967	0.384564	0.0905752	0.563261	-1.62996	4.76666	CHRNB2;GNGT2;SYT1;PRKCA;GNG12;SYN2;GRIA3
50	Antigen processing: Ubiquitination & Proteasome degradation_Homo sapiens_R-HSA-983168	8/260	0.0584796	0.384564	0.101138	0.563261	-1.60533	4.55764	HERC5;RNF213;DTX3L;TRIM69;TRIM36;UBE2L6;TRIM21;HERC6
51	Synthesis of bile acids and bile salts via 24-hydroxycholesterol_Homo sapiens_R-HSA-193775	2018-02-14	0.0204552	0.325072	0.0315149	0.508078	-1.16261	4.52201	AKR1C2;AKR1C4
52	Negative regulation of the PI3K/AKT network_Homo sapiens_R-HSA-199418	1990-04-01	0.0564393	0.384564	0.0841005	0.563261	-1.45437	4.18073	KITLG;CD80;CD19;PDGFB
53	Regulation of KIT signaling_Homo sapiens_R-HSA-1433559	2018-02-16	0.0264144	0.36007	0.0392729	0.535352	-1.13692	4.13139	KITLG;PRKCA
54	PI3K/AKT Signaling in Cancer_Homo sapiens_R-HSA-2219528	1986-04-01	0.0492363	0.384564	0.074272	0.554494	-1.36478	4.10951	KITLG;CD80;CD19;PDGFB
55	Ligand-dependent caspase activation_Homo sapiens_R-HSA-140534	2018-02-17	0.0296248	0.383641	0.0433953	0.554494	-1.15288	4.05715	TNFSF10;TLR3
56	Presynaptic function of Kainate receptors_Homo sapiens_R-HSA-500657	2018-02-21	0.0438762	0.384564	0.0613509	0.554494	-1.26132	3.94336	GNGT2;GNG12
57	G beta:gamma signalling through PLC beta_Homo sapiens_R-HSA-418217	2018-02-20	0.0401126	0.384564	0.056655	0.554494	-1.22581	3.94228	GNGT2;GNG12
58	Prostacyclin signalling through prostacyclin receptor_Homo sapiens_R-HSA-392851	2018-02-19	0.0364793	0.384564	0.0520928	0.554494	-1.18479	3.92284	GNGT2;GNG12
59	Synthesis of bile acids and bile salts via 27-hydroxycholesterol_Homo sapiens_R-HSA-193807	2018-02-15	0.0233559	0.326983	0.0353104	0.508078	-1.04224	3.9156	AKR1C2;AKR1C4
60	IRF3-mediated induction of type I IFN_Homo sapiens_R-HSA-3270619	2018-02-13	0.0177182	0.296065	0.0278933	0.498233	-0.895077	3.61	ZBP1;IFI16
61	HDL-mediated lipid transport_Homo sapiens_R-HSA-194223	2018-02-19	0.0364793	0.384564	0.0520928	0.554494	-1.06734	3.53398	CETP;A2M
62	Chaperonin-mediated protein folding_Homo sapiens_R-HSA-390466	1995-04-01	0.0661941	0.408197	0.0972334	0.563261	-1.28058	3.47698	GNGT2;TUBAL3;GNG12;TUBA8
63	EPH-Ephrin signaling_Homo sapiens_R-HSA-2682334	1995-04-01	0.0661941	0.408197	0.0972334	0.563261	-1.27388	3.4588	EPHA7;EFNA5;EPHB2;EPHB1
64	Neurotransmitter Receptor Binding And Downstream Transmission In The Postsynaptic Cell_Homo sapiens_R-HSA-112314	5/142	0.0782066	0.435211	0.117916	0.563261	-1.34715	3.43308	CHRNB2;GNGT2;PRKCA;GNG12;GRIA3
65	Serotonin Neurotransmitter Release Cycle_Homo sapiens_R-HSA-181429	2018-02-18	0.0329816	0.384564	0.0476708	0.554494	-0.994235	3.39214	SYT1;SYN2
66	Ephrin signaling_Homo sapiens_R-HSA-3928664	2018-02-19	0.0364793	0.384564	0.0520928	0.554494	-1.01582	3.36338	EPHB2;EPHB1
67	Regulation of innate immune responses to cytosolic DNA_Homo sapiens_R-HSA-3134975	2018-02-15	0.0233559	0.326983	0.0353104	0.508078	-0.89367	3.35743	ZBP1;TRIM21
68	Trafficking and processing of endosomal TLR_Homo sapiens_R-HSA-1679131	2018-02-13	0.0177182	0.296065	0.0278933	0.498233	-0.8227	3.31809	TLR3;LGMN
69	G alpha (i) signalling events_Homo sapiens_R-HSA-418594	7/240	0.0917569	0.439665	0.146097	0.572405	-1.35651	3.24017	TAS2R40;CXCL9;GNGT2;PMCH;CCL19;GNG12;CCR5
70	Trafficking of GluR2-containing AMPA receptors_Homo sapiens_R-HSA-416993	2018-02-17	0.0296248	0.383641	0.0433953	0.554494	-0.888177	3.12562	PRKCA;GRIA3
71	Potassium Channels_Homo sapiens_R-HSA-1296071	1999-04-01	0.0745875	0.434116	0.108389	0.563261	-1.2012	3.11806	KCNV2;GNGT2;KCNK13;GNG12
72	GPCR ligand binding_Homo sapiens_R-HSA-500792	11/447	0.105483	0.441484	0.184545	0.572405	-1.36517	3.07054	CX3CR1;P2RY6;TAS2R40;CXCL9;GNGT2;PMCH;CCL19;GNG12;CCR5;HCRTR2;TRHR
73	Protein folding_Homo sapiens_R-HSA-391251	4/101	0.0789765	0.435211	0.114175	0.563261	-1.20624	3.06218	GNGT2;TUBAL3;GNG12;TUBA8
74	Transmembrane transport of small molecules_Homo sapiens_R-HSA-382551	14/594	0.0971132	0.441484	0.184345	0.572405	-1.26587	2.95185	ATP10A;GNG12;ABCC11;SLC9C1;MCOLN2;SLC9C2;SLC8A1;ANO2;GNGT2;CLCN4;HEPH;SLC9A9;LCN2;SLC18A1
75	ADP signalling through P2Y purinoceptor 12_Homo sapiens_R-HSA-392170	2018-02-22	0.0477651	0.384564	0.0661746	0.554494	-0.910151	2.76819	GNGT2;GNG12
76	RIP-mediated NFkB activation via ZBP1_Homo sapiens_R-HSA-1810476	2018-02-21	0.0438762	0.384564	0.0613509	0.554494	-0.884292	2.76464	ZBP1;TLR3
77	Role of LAT2/NTAL/LAB on calcium mobilization_Homo sapiens_R-HSA-2730905	5/162	0.119026	0.468043	0.172146	0.572405	-1.19417	2.54169	MOV10;KITLG;CD80;CD19;PDGFB
78	Class I MHC mediated antigen processing & presentation_Homo sapiens_R-HSA-983169	8/305	0.11781	0.468043	0.187695	0.572405	-1.1704	2.50311	HERC5;RNF213;DTX3L;TRIM69;TRIM36;UBE2L6;TRIM21;HERC6
79	Thromboxane signalling through TP receptor_Homo sapiens_R-HSA-428930	2018-02-23	0.0517743	0.384564	0.0711202	0.554494	-0.817984	2.42194	GNGT2;GNG12
80	Xenobiotics_Homo sapiens_R-HSA-211981	2018-02-20	0.0401126	0.384564	0.056655	0.554494	-0.735242	2.36459	CYP2J2;CYP2S1
81	Ion channel transport_Homo sapiens_R-HSA-983712	6/203	0.10824	0.441484	0.163738	0.572405	-1.02106	2.27023	CLCN4;ATP10A;SLC9C1;MCOLN2;ANO2;SLC9C2
82	Post-chaperonin tubulin folding pathway_Homo sapiens_R-HSA-389977	2018-02-22	0.0477651	0.384564	0.0661746	0.554494	-0.737806	2.24401	TUBAL3;TUBA8
83	ADP signalling through P2Y purinoceptor 1_Homo sapiens_R-HSA-418592	2018-02-25	0.0601346	0.384564	0.0813543	0.554494	-0.786936	2.21221	GNGT2;GNG12
84	Growth hormone receptor signaling_Homo sapiens_R-HSA-982772	2018-02-24	0.055899	0.384564	0.076182	0.554494	-0.756656	2.18235	STAT1;PRLR
85	Dopamine Neurotransmitter Release Cycle_Homo sapiens_R-HSA-212676	2018-02-23	0.0517743	0.384564	0.0711202	0.554494	-0.688071	2.03728	SYT1;SYN2
86	Intrinsic Pathway of Fibrin Clot Formation_Homo sapiens_R-HSA-140837	2018-02-22	0.0477651	0.384564	0.0661746	0.554494	-0.663368	2.01761	F9;A2M
87	Signaling by SCF-KIT_Homo sapiens_R-HSA-1433557	8/325	0.151758	0.469985	0.233988	0.590605	-1.0567	1.99237	MOV10;KITLG;STAT1;CD19;CD80;PDGFB;PRKCA;IL17RD
88	Synthesis of bile acids and bile salts via 7alpha-hydroxycholesterol_Homo sapiens_R-HSA-193368	2018-02-24	0.055899	0.384564	0.076182	0.554494	-0.687239	1.98214	AKR1C2;AKR1C4
89	Activation of G protein gated Potassium channels_Homo sapiens_R-HSA-1296041	2018-02-25	0.0601346	0.384564	0.0813543	0.554494	-0.692099	1.94561	GNGT2;GNG12
90	Signaling by ERBB4_Homo sapiens_R-HSA-1236394	8/330	0.160916	0.469985	0.246159	0.590605	-1.06404	1.94388	MOV10;KITLG;CD19;CD80;PDGFB;IL17RD;PRLR;ESR1
91	TNFs bind their physiological receptors_Homo sapiens_R-HSA-5669034	2018-02-24	0.055899	0.384564	0.076182	0.554494	-0.646017	1.86325	TNFSF18;TNFSF13B
92	Class A/1 (Rhodopsin-like receptors)_Homo sapiens_R-HSA-373076	8/323	0.148167	0.469985	0.229182	0.590605	-0.950827	1.81552	CX3CR1;CXCL9;P2RY6;PMCH;CCL19;CCR5;HCRTR2;TRHR
93	G-protein activation_Homo sapiens_R-HSA-202040	2018-02-28	0.073461	0.432418	0.0974813	0.563261	-0.695183	1.81512	GNGT2;GNG12
94	ZBP1(DAI) mediated induction of type I IFNs_Homo sapiens_R-HSA-1606322	2018-02-26	0.0644764	0.407302	0.0866318	0.563261	-0.652844	1.78974	ZBP1;TLR3
95	Adrenaline,noradrenaline inhibits insulin secretion_Homo sapiens_R-HSA-400042	2018-02-28	0.073461	0.432418	0.0974813	0.563261	-0.684916	1.78832	GNGT2;GNG12
96	G protein gated Potassium channels_Homo sapiens_R-HSA-1296059	2018-02-25	0.0601346	0.384564	0.0813543	0.554494	-0.6248	1.75642	GNGT2;GNG12
97	Activation of Kainate Receptors upon glutamate binding_Homo sapiens_R-HSA-451326	1930-02-01	0.0828185	0.439665	0.10869	0.563261	-0.693067	1.7265	GNGT2;GNG12
98	Inhibition of voltage gated Ca2+ channels via Gbeta/gamma subunits_Homo sapiens_R-HSA-997272	2018-02-25	0.0601346	0.384564	0.0813543	0.554494	-0.607853	1.70878	GNGT2;GNG12
99	Inwardly rectifying K+ channels_Homo sapiens_R-HSA-1296065	1931-02-01	0.0876269	0.439665	0.114418	0.563261	-0.690526	1.6812	GNGT2;GNG12
100	Downstream signaling of activated FGFR1_Homo sapiens_R-HSA-5654687	8/332	0.164651	0.469985	0.251086	0.590605	-0.92224	1.66366	MOV10;KITLG;FLRT2;CD19;CD80;PDGFB;PRKCA;IL17RD
101	Synthesis of bile acids and bile salts_Homo sapiens_R-HSA-192105	2018-02-27	0.06892	0.415123	0.0920092	0.563261	-0.611774	1.63638	AKR1C2;AKR1C4
102	Signaling by FGFR1_Homo sapiens_R-HSA-5654736	8/336	0.172239	0.469985	0.261036	0.590605	-0.918158	1.61492	MOV10;KITLG;FLRT2;CD19;CD80;PDGFB;PRKCA;IL17RD
103	MAPK targets/ Nuclear events mediated by MAP kinases_Homo sapiens_R-HSA-450282	1930-02-01	0.0828185	0.439665	0.10869	0.563261	-0.634225	1.57992	MAPK10;FOS
104	Signaling by the B Cell Receptor (BCR)_Homo sapiens_R-HSA-983705	6/233	0.171349	0.469985	0.246003	0.590605	-0.841526	1.4845	MOV10;KITLG;CD19;CD80;PDGFB;CD22
105	EPHA-mediated growth cone collapse_Homo sapiens_R-HSA-3928663	1934-02-01	0.102524	0.441484	0.132037	0.563261	-0.63189	1.43923	EPHA7;EFNA5
106	Formation of tubulin folding intermediates by CCT/TriC_Homo sapiens_R-HSA-389960	2018-02-25	0.0601346	0.384564	0.0813543	0.554494	-0.506222	1.42308	TUBAL3;TUBA8
107	Caspase activation via extrinsic apoptotic signalig pathway_Homo sapiens_R-HSA-5357769	2018-02-27	0.06892	0.415123	0.0920092	0.563261	-0.529887	1.41735	TNFSF10;TLR3
108	Glucagon-type ligand receptors_Homo sapiens_R-HSA-420092	1930-02-01	0.0828185	0.439665	0.10869	0.563261	-0.564716	1.40677	GNGT2;GNG12
109	Signal amplification_Homo sapiens_R-HSA-392518	1932-02-01	0.0925164	0.439665	0.120221	0.563261	-0.570844	1.35882	GNGT2;GNG12
110	Opioid Signalling_Homo sapiens_R-HSA-111885	1981-03-01	0.140314	0.469985	0.184515	0.572405	-0.686231	1.34767	GNGT2;PRKCA;GNG12
111	Glutamate Binding, Activation of AMPA Receptors and Synaptic Plasticity_Homo sapiens_R-HSA-399721	1931-02-01	0.0876269	0.439665	0.114418	0.563261	-0.542997	1.32202	PRKCA;GRIA3
112	Downstream signal transduction_Homo sapiens_R-HSA-186763	8/341	0.181942	0.475765	0.273642	0.599189	-0.764769	1.30322	MOV10;KITLG;STAT1;CD19;CD80;PDGFB;PRKCA;IL17RD
113	Regulation of insulin secretion_Homo sapiens_R-HSA-422356	1980-03-01	0.136636	0.469985	0.180093	0.572405	-0.654114	1.30197	GNGT2;PRKCA;GNG12
114	Signaling by NOTCH2_Homo sapiens_R-HSA-1980145	1932-02-01	0.0925164	0.439665	0.120221	0.563261	-0.527162	1.25484	MAML2;GZMB
115	Trafficking of AMPA receptors_Homo sapiens_R-HSA-399719	1931-02-01	0.0876269	0.439665	0.114418	0.563261	-0.510344	1.24252	PRKCA;GRIA3
116	Thrombin signalling through proteinase activated receptors (PARs)_Homo sapiens_R-HSA-456926	1932-02-01	0.0925164	0.439665	0.120221	0.563261	-0.513907	1.22329	GNGT2;GNG12
117	Diseases of signal transduction_Homo sapiens_R-HSA-5663202	7/288	0.180171	0.473749	0.264413	0.592926	-0.704148	1.2068	KITLG;SMAD3;MAML2;STAT1;CD19;CD80;PDGFB
118	Downstream signaling events of B Cell Receptor (BCR)_Homo sapiens_R-HSA-1168372	5/192	0.194892	0.476026	0.267325	0.594311	-0.641838	1.0496	MOV10;KITLG;CD80;CD19;PDGFB
119	Cooperation of Prefoldin and TriC/CCT in actin and tubulin folding_Homo sapiens_R-HSA-389958	1932-02-01	0.0925164	0.439665	0.120221	0.563261	-0.415869	0.989922	TUBAL3;TUBA8
120	Lipoprotein metabolism_Homo sapiens_R-HSA-174824	1934-02-01	0.102524	0.441484	0.132037	0.563261	-0.384562	0.875901	CETP;A2M
121	Toll-Like Receptors Cascades_Homo sapiens_R-HSA-168898	4/140	0.18679	0.476026	0.248893	0.590605	-0.500242	0.839292	MAPK10;FOS;TLR3;LGMN
122	Platelet homeostasis_Homo sapiens_R-HSA-418346	1987-03-01	0.163051	0.469985	0.211611	0.586175	-0.458751	0.832035	GNGT2;GNG12;SLC8A1
123	Beta-catenin independent WNT signaling_Homo sapiens_R-HSA-3858494	4/144	0.199787	0.476026	0.264387	0.592926	-0.503221	0.81044	MOV10;GNGT2;PRKCA;GNG12
124	Activation of Matrix Metalloproteinases_Homo sapiens_R-HSA-1592389	1932-02-01	0.0925164	0.439665	0.120221	0.563261	-0.320114	0.761989	MMP13;MMP3
125	Oxidative Stress Induced Senescence_Homo sapiens_R-HSA-2559580	1991-03-01	0.178779	0.472986	0.230135	0.590605	-0.389642	0.67081	MAPK10;MOV10;FOS
126	Bile acid and bile salt metabolism_Homo sapiens_R-HSA-194068	1935-02-01	0.107634	0.441484	0.138042	0.572405	-0.272883	0.608261	AKR1C2;AKR1C4
127	Signaling by PDGF_Homo sapiens_R-HSA-186797	8/364	0.229418	0.503553	0.333562	0.642305	-0.402822	0.593038	MOV10;KITLG;STAT1;CD19;CD80;PDGFB;PRKCA;IL17RD
128	Signaling by FGFR_Homo sapiens_R-HSA-190236	8/366	0.233745	0.50874	0.338888	0.644859	-0.397204	0.577346	MOV10;KITLG;FLRT2;CD19;CD80;PDGFB;PRKCA;IL17RD
129	NS1 Mediated Effects on Host Pathways_Homo sapiens_R-HSA-168276	1939-02-01	0.128708	0.469985	0.162611	0.572405	-0.270127	0.553817	EIF2AK2;ISG15
130	Activation of GABAB receptors_Homo sapiens_R-HSA-991365	1939-02-01	0.128708	0.469985	0.162611	0.572405	-0.264778	0.542851	GNGT2;GNG12
131	Platelet activation, signaling and aggregation_Homo sapiens_R-HSA-76002	6/253	0.22021	0.498117	0.306434	0.617637	-0.324609	0.49119	GNGT2;PDGFB;PRKCA;A2M;GNG12;DGKH
132	GABA B receptor activation_Homo sapiens_R-HSA-977444	1939-02-01	0.128708	0.469985	0.162611	0.572405	-0.226651	0.464682	GNGT2;GNG12
133	Phase 1 - Functionalization of compounds_Homo sapiens_R-HSA-211945	1992-03-01	0.182774	0.475765	0.234814	0.590605	-0.25148	0.427391	CYP2J2;MAOB;CYP2S1
134	MyD88-independent TLR3/TLR4 cascade_Homo sapiens_R-HSA-166166	1997-03-01	0.203092	0.476026	0.258444	0.590605	-0.263549	0.420122	MAPK10;FOS;TLR3
135	Host Interactions with Influenza Factors_Homo sapiens_R-HSA-168253	1941-02-01	0.139578	0.469985	0.175174	0.572405	-0.206427	0.406481	EIF2AK2;ISG15
136	Toll Like Receptor 3 (TLR3) Cascade_Homo sapiens_R-HSA-168164	1997-03-01	0.203092	0.476026	0.258444	0.590605	-0.254411	0.405554	MAPK10;FOS;TLR3
137	TRIF-mediated TLR3/TLR4 signaling_Homo sapiens_R-HSA-937061	1997-03-01	0.203092	0.476026	0.258444	0.590605	-0.246017	0.392175	MAPK10;FOS;TLR3
138	Cooperation of PDCL (PhLP1) and TRiC/CCT in G-protein beta folding_Homo sapiens_R-HSA-6814122	1942-02-01	0.145085	0.469985	0.181513	0.572405	-0.186311	0.359661	GNGT2;GNG12
139	Collagen degradation_Homo sapiens_R-HSA-1442490	1939-02-01	0.128708	0.469985	0.162611	0.572405	-0.1612	0.330494	MMP13;MMP3
140	EPHB-mediated forward signaling_Homo sapiens_R-HSA-3928662	1942-02-01	0.145085	0.469985	0.181513	0.572405	-0.158148	0.305294	EPHB2;EPHB1
141	Glucagon-like Peptide-1 (GLP1) regulates insulin secretion_Homo sapiens_R-HSA-381676	1942-02-01	0.145085	0.469985	0.181513	0.572405	-0.155521	0.300222	GNGT2;GNG12
142	Nuclear signaling by ERBB4_Homo sapiens_R-HSA-1251985	1939-02-01	0.128708	0.469985	0.162611	0.572405	-0.13511	0.277004	PRLR;ESR1
143	Formation of Fibrin Clot (Clotting Cascade)_Homo sapiens_R-HSA-140877	1939-02-01	0.128708	0.469985	0.162611	0.572405	-0.107461	0.220317	F9;A2M
144	Intrinsic Pathway for Apoptosis_Homo sapiens_R-HSA-109606	1942-02-01	0.145085	0.469985	0.181513	0.572405	-0.110968	0.214216	GZMB;TP63
145	Non-integrin membrane-ECM interactions_Homo sapiens_R-HSA-3000171	1942-02-01	0.145085	0.469985	0.181513	0.572405	-0.105242	0.203163	PDGFB;PRKCA
146	Pre-NOTCH Transcription and Translation_Homo sapiens_R-HSA-1912408	1941-02-01	0.139578	0.469985	0.175174	0.572405	-0.0770896	0.1518	MOV10;MAML2
147	Vasopressin regulates renal water homeostasis via Aquaporins_Homo sapiens_R-HSA-432040	1943-02-01	0.150637	0.469985	0.187886	0.572405	-0.0735391	0.139201	GNGT2;GNG12
148	Downstream signaling of activated FGFR2_Homo sapiens_R-HSA-5654696	7/329	0.275466	0.523388	0.380824	0.651585	-0.0668081	0.0861351	MOV10;KITLG;CD19;CD80;PDGFB;PRKCA;IL17RD
149	Downstream signaling of activated FGFR3_Homo sapiens_R-HSA-5654708	7/329	0.275466	0.523388	0.380824	0.651585	-0.0577729	0.0744861	MOV10;KITLG;CD19;CD80;PDGFB;PRKCA;IL17RD
150	Downstream signaling of activated FGFR4_Homo sapiens_R-HSA-5654716	7/329	0.275466	0.523388	0.380824	0.651585	-0.047841	0.061681	MOV10;KITLG;CD19;CD80;PDGFB;PRKCA;IL17RD
151	Signaling by FGFR4_Homo sapiens_R-HSA-5654743	7/332	0.28293	0.534883	0.389552	0.651936	-0.0299277	0.0377854	MOV10;KITLG;CD19;CD80;PDGFB;PRKCA;IL17RD
152	Signaling by FGFR3_Homo sapiens_R-HSA-5654741	7/333	0.28543	0.535585	0.392462	0.651936	-0.0263283	0.0330093	MOV10;KITLG;CD19;CD80;PDGFB;PRKCA;IL17RD
153	Disease_Homo sapiens_R-HSA-1643685	14/725	0.273183	0.523388	0.429807	0.681199	-0.014894	0.0193267	SMAD3;MAML2;SYT1;STAT1;CD80;PDGFB;EIF2AK2;ISG15;KITLG;VCAN;ADAMTS19;CD19;CCR5;TLR3
154	Cell Cycle_Homo sapiens_R-HSA-1640170	1/566	0.999905	0.999905	0.99997	0.999989	2.1973	-0.000208731	PRKCA
155	Gene Expression_Homo sapiens_R-HSA-74160	11/1631	0.999828	0.999905	0.999989	0.999989	2.03304	-0.000349765	HELZ2;TDRD1;MOV10;SMAD3;MAML2;ADAR;PRKCA;FOS;ESR1;TP63;PML
156	Cell Cycle, Mitotic_Homo sapiens_R-HSA-69278	1/462	0.999468	0.999905	0.999786	0.999989	2.18835	-0.00116352	PRKCA
157	Integration of energy metabolism_Homo sapiens_R-HSA-163685	3/110	0.257978	0.521299	0.321027	0.632288	0.00687033	-0.00930848	GNGT2;PRKCA;GNG12
158	Organelle biogenesis and maintenance_Homo sapiens_R-HSA-1852241	1/326	0.995017	0.999905	0.997322	0.999989	1.94254	-0.00970387	HELZ2
159	Membrane Trafficking_Homo sapiens_R-HSA-199991	2/420	0.991522	0.999238	0.995888	0.999989	1.95222	-0.0166222	MYH6;MYH7
160	M Phase_Homo sapiens_R-HSA-68886	1/268	0.987119	0.99674	0.992219	0.999989	2.13224	-0.0276431	PRKCA
161	Asparagine N-linked glycosylation_Homo sapiens_R-HSA-446203	1/259	0.985078	0.996622	0.990824	0.999989	1.85022	-0.0278172	ST6GALNAC3
162	Signalling by NGF_Homo sapiens_R-HSA-166520	9/450	0.2952	0.545933	0.420436	0.676542	0.0305077	-0.0372226	MOV10;KITLG;MCF2;CD19;CD80;PDGFB;PRKCA;IL17RD;FGD2
163	Chromatin modifying enzymes_Homo sapiens_R-HSA-3247509	1/226	0.974423	0.987771	0.983229	0.99726	1.92101	-0.0497726	PRDM16
164	Chromatin organization_Homo sapiens_R-HSA-4839726	1/226	0.974423	0.987771	0.983229	0.99726	1.93018	-0.0500101	PRDM16
165	Metabolism of amino acids and derivatives_Homo sapiens_R-HSA-71291	2/335	0.971879	0.987771	0.983784	0.99726	1.86392	-0.0531672	TPH1;KMO
166	HIV Infection_Homo sapiens_R-HSA-162906	1/222	0.972699	0.987771	0.98196	0.99726	2.15947	-0.0597763	CCR5
167	Olfactory Signaling Pathway_Homo sapiens_R-HSA-381753	3/418	0.964942	0.985878	0.981238	0.99726	1.83764	-0.0655798	OR2G3;OR52K2;OR52K1
168	Apoptosis_Homo sapiens_R-HSA-109581	4/163	0.264675	0.521299	0.339858	0.644859	0.0495088	-0.0658097	TNFSF10;GZMB;TP63;TLR3
169	Fc epsilon receptor (FCERI) signaling_Homo sapiens_R-HSA-2454202	8/395	0.299315	0.545933	0.417102	0.675183	0.0634558	-0.0765442	MAPK10;MOV10;KITLG;CD19;CD80;PDGFB;FOS;IL17RD
170	Vesicle-mediated transport_Homo sapiens_R-HSA-5653656	4/492	0.956839	0.979531	0.978133	0.99726	1.87909	-0.0829048	COLEC12;APOL1;MYH6;MYH7
171	Programmed Cell Death_Homo sapiens_R-HSA-5357801	4/166	0.275283	0.523388	0.351919	0.651585	0.0642794	-0.0829176	TNFSF10;GZMB;TP63;TLR3
172	Generic Transcription Pathway_Homo sapiens_R-HSA-212436	8/812	0.950489	0.974958	0.980728	0.99726	1.8439	-0.0936297	HELZ2;MOV10;SMAD3;MAML2;FOS;ESR1;TP63;PML
173	PPARA activates gene expression_Homo sapiens_R-HSA-1989781	3/113	0.270939	0.523388	0.335557	0.642305	0.0839809	-0.109667	HELZ2;GRHL1;RGL1
174	Metabolism of carbohydrates_Homo sapiens_R-HSA-71387	2/282	0.9421	0.968269	0.962996	0.993689	1.84712	-0.11017	VCAN;HPSE
175	DAP12 signaling_Homo sapiens_R-HSA-2424491	7/344	0.313248	0.557602	0.424472	0.676542	0.107131	-0.124354	MOV10;KITLG;CD19;CD80;PDGFB;PRKCA;IL17RD
176	Metabolism of proteins_Homo sapiens_R-HSA-392499	12/1074	0.928827	0.956525	0.975809	0.99726	1.87831	-0.138681	SP100;F9;GNGT2;TUBAL3;ADAMTS19;PAPPA;UBE2L6;TGFBI;ST6GALNAC3;GNG12;PML;TUBA8
177	Post-translational protein modification_Homo sapiens_R-HSA-597592	5/521	0.922438	0.951839	0.959184	0.991731	1.78818	-0.144369	SP100;F9;ADAMTS19;ST6GALNAC3;PML
178	Metabolism_Homo sapiens_R-HSA-1430728	24/1908	0.915029	0.946078	0.98321	0.99726	1.89458	-0.168238	CYP2J2;CETP;TPH1;MAOB;MOGAT1;AKR1C2;PRKCA;AKR1C4;KMO;GRHL1;GNG12;AK8;HELZ2;MT2A;VCAN;GNGT2;CA3;CYP2S1;UPP2;HPSE;RGL1;A2M;SULT4A1;LGMN
179	Activated TLR4 signalling_Homo sapiens_R-HSA-166054	3/112	0.26661	0.523121	0.330714	0.642305	0.128477	-0.169843	MAPK10;FOS;TLR3
180	GPCR downstream signaling_Homo sapiens_R-HSA-388396	18/983	0.3115	0.556403	0.50178	0.702492	0.151533	-0.176741	TAS2R40;CXCL9;OR2G3;MCF2;PMCH;PRKCA;OR52K2;GNG12;OR52K1;HCRTR2;TRHR;FGD2;P2RY6;GNGT2;CCL19;CCR5;PDE7A;DGKH
181	Response to elevated platelet cytosolic Ca2+_Homo sapiens_R-HSA-76005	3/110	0.257978	0.521299	0.321027	0.632288	0.135909	-0.18414	PDGFB;PRKCA;A2M
182	Regulation of lipid metabolism by Peroxisome proliferator-activated receptor alpha (PPARalpha)_Homo sapiens_R-HSA-400206	3/116	0.283969	0.534895	0.350075	0.651585	0.149104	-0.187705	HELZ2;GRHL1;RGL1
183	Iron uptake and transport_Homo sapiens_R-HSA-917937	1943-02-01	0.150637	0.469985	0.187886	0.572405	0.110668	-0.209482	HEPH;LCN2
184	Factors involved in megakaryocyte development and platelet production_Homo sapiens_R-HSA-983231	1/141	0.897951	0.930278	0.921539	0.954714	1.96624	-0.211645	DOCK4
185	HIV Life Cycle_Homo sapiens_R-HSA-162587	1/141	0.897951	0.930278	0.921539	0.954714	2.04335	-0.219945	CCR5
186	NRAGE signals death through JNK_Homo sapiens_R-HSA-193648	1945-02-01	0.161863	0.469985	0.200722	0.575178	0.130824	-0.238231	MCF2;FGD2
187	Antigen activates B Cell Receptor (BCR) leading to generation of second messengers_Homo sapiens_R-HSA-983695	1947-02-01	0.173234	0.469985	0.213656	0.588692	0.136299	-0.238947	CD19;CD22
188	Cell-Cell communication_Homo sapiens_R-HSA-1500931	1/131	0.879957	0.915296	0.906012	0.944295	1.97878	-0.253051	PARD3
189	Signaling by EGFR_Homo sapiens_R-HSA-177929	7/355	0.341542	0.563566	0.456325	0.681199	0.235653	-0.253159	MOV10;KITLG;CD19;CD80;PDGFB;PRKCA;IL17RD
190	Signaling by Insulin receptor_Homo sapiens_R-HSA-74752	3/311	0.877324	0.914394	0.919281	0.954714	2.01396	-0.263584	KITLG;PDGFB;IL17RD
191	Signaling by GPCR_Homo sapiens_R-HSA-372790	23/1293	0.329342	0.563566	0.552537	0.722763	0.241835	-0.268596	CX3CR1;TAS2R40;CXCL9;OR2G3;MCF2;MMP3;PMCH;PDGFB;PRKCA;OR52K2;IL17RD;GNG12;OR52K1;HCRTR2;TRHR;FGD2;KITLG;P2RY6;GNGT2;CCL19;CCR5;PDE7A;DGKH
192	C-type lectin receptors (CLRs)_Homo sapiens_R-HSA-5621481	1/123	0.86331	0.901602	0.891422	0.935183	1.9775	-0.290656	CLEC4C
193	DNA Repair_Homo sapiens_R-HSA-73894	3/285	0.83728	0.881558	0.887722	0.935183	1.77344	-0.314956	TRIM25;UBE2L6;ISG15
194	Cellular responses to stress_Homo sapiens_R-HSA-2262752	4/367	0.841707	0.881558	0.897784	0.939499	1.84036	-0.317138	MAPK10;MOV10;CRYBA4;FOS
195	Toll Like Receptor 4 (TLR4) Cascade_Homo sapiens_R-HSA-166016	3/122	0.310168	0.555942	0.378997	0.651585	0.279342	-0.327009	MAPK10;FOS;TLR3
196	IGF1R signaling cascade_Homo sapiens_R-HSA-2428924	3/288	0.842416	0.881558	0.891854	0.935183	1.93964	-0.332612	KITLG;PDGFB;IL17RD
197	IRS-related events triggered by IGF1R_Homo sapiens_R-HSA-2428928	3/288	0.842416	0.881558	0.891854	0.935183	1.94744	-0.33395	KITLG;PDGFB;IL17RD
198	Signaling by NOTCH_Homo sapiens_R-HSA-157118	3/122	0.310168	0.555942	0.378997	0.651585	0.286161	-0.334992	MOV10;MAML2;GZMB
199	Signaling by Type 1 Insulin-like Growth Factor 1 Receptor (IGF1R)_Homo sapiens_R-HSA-2404192	3/288	0.842416	0.881558	0.891854	0.935183	1.95756	-0.335685	KITLG;PDGFB;IL17RD
200	Insulin receptor signalling cascade_Homo sapiens_R-HSA-74751	3/287	0.84072	0.881558	0.890492	0.935183	1.93666	-0.336005	KITLG;PDGFB;IL17RD
201	IRS-mediated signalling_Homo sapiens_R-HSA-112399	3/284	0.835537	0.881558	0.886314	0.935183	1.94226	-0.348988	KITLG;PDGFB;IL17RD
202	G beta:gamma signalling through PI3Kgamma_Homo sapiens_R-HSA-392451	1948-02-01	0.178968	0.472986	0.220154	0.590605	0.206898	-0.355979	GNGT2;GNG12
203	Transcriptional Regulation by TP53_Homo sapiens_R-HSA-3700989	4/348	0.810619	0.863499	0.873399	0.928995	1.7354	-0.364359	MOV10;FOS;PML;TP63
204	DAP12 interactions_Homo sapiens_R-HSA-2172127	7/359	0.351917	0.570025	0.467831	0.683305	0.349136	-0.364624	MOV10;KITLG;CD19;CD80;PDGFB;PRKCA;IL17RD
205	Infectious disease_Homo sapiens_R-HSA-5663205	4/348	0.810619	0.863499	0.873399	0.928995	1.8181	-0.381722	SYT1;EIF2AK2;ISG15;CCR5
206	Mitotic Prophase_Homo sapiens_R-HSA-68875	1/107	0.822799	0.873381	0.855153	0.915225	2.02541	-0.395042	PRKCA
207	Developmental Biology_Homo sapiens_R-HSA-1266738	10/786	0.811822	0.863499	0.904533	0.944295	1.91028	-0.398244	HELZ2;EPHA7;KITLG;SMAD3;PDGFB;NRCAM;EPHB2;IL17RD;EFNA5;EPHB1
208	NCAM signaling for neurite out-growth_Homo sapiens_R-HSA-375165	3/266	0.80132	0.861365	0.858168	0.916559	1.8057	-0.399953	KITLG;PDGFB;IL17RD
209	G-protein beta:gamma signalling_Homo sapiens_R-HSA-397795	1951-02-01	0.19633	0.476026	0.239736	0.590605	0.253093	-0.412025	GNGT2;GNG12
210	Aquaporin-mediated transport_Homo sapiens_R-HSA-445717	1951-02-01	0.19633	0.476026	0.239736	0.590605	0.260637	-0.424306	GNGT2;GNG12
211	MHC class II antigen presentation_Homo sapiens_R-HSA-2132295	1/103	0.810925	0.863499	0.844343	0.907406	2.07064	-0.433964	LGMN
212	Interleukin-3, 5 and GM-CSF signaling_Homo sapiens_R-HSA-512988	3/261	0.790817	0.853423	0.849344	0.910891	1.86173	-0.436927	KITLG;PDGFB;IL17RD
213	Signaling by FGFR2_Homo sapiens_R-HSA-5654738	7/361	0.357117	0.572713	0.473565	0.683305	0.428472	-0.441195	MOV10;KITLG;CD19;CD80;PDGFB;PRKCA;IL17RD
214	Gene Silencing by RNA_Homo sapiens_R-HSA-211000	1/101	0.804694	0.863005	0.838642	0.905034	2.03507	-0.442206	TDRD1
215	Signalling to ERKs_Homo sapiens_R-HSA-187687	3/253	0.773059	0.838794	0.834243	0.903757	1.7857	-0.459639	KITLG;PDGFB;IL17RD
216	Metabolism of lipids and lipoproteins_Homo sapiens_R-HSA-556833	9/659	0.731306	0.814659	0.841979	0.906746	1.47646	-0.462019	HELZ2;CYP2J2;CETP;MOGAT1;AKR1C2;AKR1C4;RGL1;A2M;GRHL1
217	MAP kinase activation in TLR cascade_Homo sapiens_R-HSA-450294	1960-02-01	0.249371	0.521299	0.298737	0.608518	0.333775	-0.463551	MAPK10;FOS
218	Phase II conjugation_Homo sapiens_R-HSA-156580	1/100	0.801502	0.861365	0.835713	0.903757	2.13544	-0.472503	SULT4A1
219	Signalling to RAS_Homo sapiens_R-HSA-167044	3/246	0.75653	0.825016	0.819987	0.892339	1.77221	-0.49447	KITLG;PDGFB;IL17RD
220	Signal Transduction_Homo sapiens_R-HSA-162582	42/2465	0.355217	0.571436	0.680466	0.808914	0.490941	-0.508137	CX3CR1;TAS2R40;CXCL9;MAML2;OR2G3;CD80;PMCH;PDGFB;FGD2;P2RY6;GNGT2;FLRT2;CD19;CHN1;TNFSF10;CCL19;A2M;CCR5;SMAD3;STAT1;MCF2;MMP3;GZMB;PRKCA;AKR1C4;OR52K2;IL17RD;GNG12;ARHGAP26;OR52K1;PRLR;ESR1;HCRTR2;ARHGAP24;TRHR;MOV10;KITLG;AXL;PARD3;AMOTL2;PDE7A;DGKH
221	MAPK6/MAPK4 signaling_Homo sapiens_R-HSA-5687128	1992-01-01	0.774022	0.838794	0.810306	0.888579	1.98616	-0.508766	MOV10
222	Cellular response to heat stress_Homo sapiens_R-HSA-3371556	1996-01-01	0.788206	0.852381	0.823463	0.894243	2.14593	-0.510724	CRYBA4
223	Signaling by Leptin_Homo sapiens_R-HSA-2586552	3/243	0.749156	0.822395	0.813568	0.889089	1.77458	-0.512513	KITLG;PDGFB;IL17RD
224	Interleukin receptor SHC signaling_Homo sapiens_R-HSA-912526	3/245	0.754092	0.824092	0.817869	0.891907	1.81658	-0.512715	KITLG;PDGFB;IL17RD
225	NGF signalling via TRKA from the plasma membrane_Homo sapiens_R-HSA-187037	7/374	0.391049	0.590475	0.510427	0.708594	0.550061	-0.516464	MOV10;KITLG;CD19;CD80;PDGFB;PRKCA;IL17RD
226	Prolonged ERK activation events_Homo sapiens_R-HSA-169893	3/242	0.746658	0.822395	0.811386	0.888579	1.77879	-0.519668	KITLG;PDGFB;IL17RD
227	MAPK1/MAPK3 signaling_Homo sapiens_R-HSA-5684996	3/241	0.744141	0.821887	0.809183	0.888579	1.7722	-0.52373	KITLG;PDGFB;IL17RD
228	Frs2-mediated activation_Homo sapiens_R-HSA-170968	3/240	0.741604	0.820835	0.806958	0.888579	1.77477	-0.530549	KITLG;PDGFB;IL17RD
229	ARMS-mediated activation_Homo sapiens_R-HSA-170984	3/239	0.739047	0.819757	0.804712	0.888579	1.76193	-0.532795	KITLG;PDGFB;IL17RD
230	Signalling to p38 via RIT and RIN_Homo sapiens_R-HSA-187706	3/239	0.739047	0.819757	0.804712	0.888579	1.7734	-0.536263	KITLG;PDGFB;IL17RD
231	Signaling by Wnt_Homo sapiens_R-HSA-195721	4/295	0.69761	0.80421	0.778129	0.88587	1.50561	-0.542164	MOV10;GNGT2;PRKCA;GNG12
232	FRS-mediated FGFR1 signaling_Homo sapiens_R-HSA-5654693	3/236	0.731257	0.814659	0.797842	0.886871	1.74455	-0.546027	KITLG;PDGFB;IL17RD
233	PCP/CE pathway_Homo sapiens_R-HSA-4086400	1991-01-01	0.77033	0.838301	0.806867	0.888579	2.0975	-0.547314	PRKCA
234	FRS-mediated FGFR2 signaling_Homo sapiens_R-HSA-5654700	3/236	0.731257	0.814659	0.797842	0.886871	1.75809	-0.550264	KITLG;PDGFB;IL17RD
235	GRB2 events in EGFR signaling_Homo sapiens_R-HSA-179812	3/235	0.72862	0.814659	0.795507	0.886871	1.73825	-0.550337	KITLG;PDGFB;IL17RD
236	RAF/MAP kinase cascade_Homo sapiens_R-HSA-5673001	3/235	0.72862	0.814659	0.795507	0.886871	1.74608	-0.552815	KITLG;PDGFB;IL17RD
237	FRS-mediated FGFR3 signaling_Homo sapiens_R-HSA-5654706	3/236	0.731257	0.814659	0.797842	0.886871	1.76718	-0.553109	KITLG;PDGFB;IL17RD
238	Regulation of TP53 Activity_Homo sapiens_R-HSA-5633007	2/151	0.698638	0.80421	0.756092	0.868425	1.54292	-0.553327	PML;TP63
239	Muscle contraction_Homo sapiens_R-HSA-397014	4/196	0.38358	0.587102	0.471036	0.683305	0.578024	-0.553866	NPR1;KCNK13;SLC8A1;MYH6
240	FRS-mediated FGFR4 signaling_Homo sapiens_R-HSA-5654712	3/236	0.731257	0.814659	0.797842	0.886871	1.77477	-0.555486	KITLG;PDGFB;IL17RD
241	SHC1 events in EGFR signaling_Homo sapiens_R-HSA-180336	3/235	0.72862	0.814659	0.795507	0.886871	1.75782	-0.556532	KITLG;PDGFB;IL17RD
242	SHC1 events in ERBB4 signaling_Homo sapiens_R-HSA-1250347	3/235	0.72862	0.814659	0.795507	0.886871	1.76683	-0.559383	KITLG;PDGFB;IL17RD
243	SOS-mediated signalling_Homo sapiens_R-HSA-112412	3/235	0.72862	0.814659	0.795507	0.886871	1.77395	-0.561639	KITLG;PDGFB;IL17RD
244	Influenza Infection_Homo sapiens_R-HSA-168254	2/147	0.68451	0.795607	0.742927	0.862862	1.49592	-0.56703	EIF2AK2;ISG15
245	Biological oxidations_Homo sapiens_R-HSA-211859	4/199	0.394432	0.590475	0.482588	0.694391	0.620375	-0.577141	CYP2J2;MAOB;CYP2S1;SULT4A1
246	Metabolism of vitamins and cofactors_Homo sapiens_R-HSA-196854	2/148	0.688092	0.795607	0.746274	0.864809	1.5735	-0.588224	AKR1C4;LGMN
247	MAPK family signaling cascades_Homo sapiens_R-HSA-5683057	4/284	0.668973	0.780468	0.752553	0.868201	1.4961	-0.601451	MOV10;KITLG;PDGFB;IL17RD
248	SLC-mediated transmembrane transport_Homo sapiens_R-HSA-425407	4/268	0.624121	0.742866	0.711451	0.8319	1.29777	-0.611785	HEPH;SLC9A9;SLC18A1;SLC8A1
249	Regulation of mRNA stability by proteins that bind AU-rich elements_Homo sapiens_R-HSA-450531	1986-01-01	0.750951	0.822395	0.78872	0.886871	2.18914	-0.627	PRKCA
250	Cardiac conduction_Homo sapiens_R-HSA-5576891	3/135	0.367017	0.584968	0.44057	0.681199	0.648617	-0.65014	NPR1;KCNK13;SLC8A1
251	Fatty acid, triacylglycerol, and ketone body metabolism_Homo sapiens_R-HSA-535734	4/217	0.45868	0.630229	0.549613	0.722763	0.840863	-0.655371	HELZ2;MOGAT1;RGL1;GRHL1
252	Cell junction organization_Homo sapiens_R-HSA-446728	1986-01-01	0.750951	0.822395	0.78872	0.886871	2.28853	-0.655468	PARD3
253	Signaling by Rho GTPases_Homo sapiens_R-HSA-194315	6/367	0.536012	0.678861	0.648404	0.790291	1.07504	-0.670391	MCF2;CHN1;A2M;ARHGAP26;ARHGAP24;FGD2
254	Signaling by Interleukins_Homo sapiens_R-HSA-449147	6/392	0.600448	0.721543	0.709224	0.8319	1.31681	-0.671675	KITLG;STAT1;IL15;PDGFB;LGALS9;IL17RD
255	Neurotransmitter Release Cycle_Homo sapiens_R-HSA-112310	1951-02-01	0.19633	0.476026	0.239736	0.590605	0.417749	-0.680078	SYT1;SYN2
256	G alpha (s) signalling events_Homo sapiens_R-HSA-418555	3/142	0.397348	0.591455	0.472782	0.683305	0.753906	-0.695813	GNGT2;PDE7A;GNG12
257	Regulation of HSF1-mediated heat shock response_Homo sapiens_R-HSA-3371453	1980-01-01	0.725534	0.814659	0.764696	0.872495	2.17346	-0.697351	CRYBA4
258	Hemostasis_Homo sapiens_R-HSA-109582	9/552	0.52446	0.670791	0.663321	0.802804	1.09266	-0.705187	DOCK4;F9;GNGT2;PDGFB;PRKCA;A2M;GNG12;SLC8A1;DGKH
259	Interleukin-2 signaling_Homo sapiens_R-HSA-451927	4/252	0.57563	0.709943	0.665646	0.80374	1.289	-0.711903	KITLG;PDGFB;LGALS9;IL17RD
260	GABA receptor activation_Homo sapiens_R-HSA-977443	1955-02-01	0.219775	0.498117	0.265963	0.59383	0.471045	-0.713703	GNGT2;GNG12
261	Metabolism of fat-soluble vitamins_Homo sapiens_R-HSA-6806667	1951-02-01	0.19633	0.476026	0.239736	0.590605	0.444452	-0.723549	AKR1C4;LGMN
262	FCERI mediated MAPK activation_Homo sapiens_R-HSA-2871796	5/289	0.493034	0.649852	0.595894	0.752759	1.0234	-0.723724	MAPK10;KITLG;PDGFB;FOS;IL17RD
263	Axon guidance_Homo sapiens_R-HSA-422475	8/515	0.583538	0.714593	0.710564	0.8319	1.34377	-0.723813	EPHA7;KITLG;PDGFB;NRCAM;EPHB2;IL17RD;EFNA5;EPHB1
264	Complement cascade_Homo sapiens_R-HSA-166658	1980-01-01	0.725534	0.814659	0.764696	0.872495	2.25792	-0.724448	C1QB
265	VEGFA-VEGFR2 Pathway_Homo sapiens_R-HSA-4420097	5/320	0.583388	0.714593	0.683778	0.810519	1.34948	-0.727238	KITLG;AXL;PDGFB;PRKCA;IL17RD
266	Signaling by VEGF_Homo sapiens_R-HSA-194138	5/328	0.605275	0.724094	0.70427	0.829118	1.44871	-0.727359	KITLG;AXL;PDGFB;PRKCA;IL17RD
267	Senescence-Associated Secretory Phenotype (SASP)_Homo sapiens_R-HSA-2559582	1977-01-01	0.711871	0.814659	0.751685	0.868201	2.14839	-0.730149	FOS
268	Transcriptional regulation of white adipocyte differentiation_Homo sapiens_R-HSA-381340	1979-01-01	0.721053	0.814659	0.760436	0.871473	2.24608	-0.734565	HELZ2
269	VEGFR2 mediated cell proliferation_Homo sapiens_R-HSA-5218921	4/248	0.562971	0.697653	0.653462	0.792725	1.29151	-0.742005	KITLG;PDGFB;PRKCA;IL17RD
270	Heparan sulfate/heparin (HS-GAG) metabolism_Homo sapiens_R-HSA-1638091	1954-02-01	0.213889	0.490535	0.2594	0.590605	0.491205	-0.757585	VCAN;HPSE
271	TRAF6 Mediated Induction of proinflammatory cytokines_Homo sapiens_R-HSA-168180	1972-02-01	0.32049	0.558211	0.376091	0.651585	0.669362	-0.761669	MAPK10;FOS
272	Biosynthesis of the N-glycan precursor (dolichol lipid-linked oligosaccharide, LLO) and transfer to a nascent protein_Homo sapiens_R-HSA-446193	1978-01-01	0.716499	0.814659	0.7561	0.868425	2.28655	-0.762287	ST6GALNAC3
273	Glycosaminoglycan metabolism_Homo sapiens_R-HSA-1630316	2/121	0.579289	0.712759	0.642099	0.787594	1.39858	-0.763561	VCAN;HPSE
274	Cellular Senescence_Homo sapiens_R-HSA-2559583	3/161	0.477277	0.642155	0.555583	0.724916	1.06363	-0.786721	MAPK10;MOV10;FOS
275	Cell death signalling via NRAGE, NRIF and NADE_Homo sapiens_R-HSA-204998	1961-02-01	0.25531	0.521299	0.305271	0.617637	0.6018	-0.821623	MCF2;FGD2
276	Costimulation by the CD28 family_Homo sapiens_R-HSA-388841	1972-01-01	0.687577	0.795607	0.728392	0.847881	2.21602	-0.830078	CD80
277	Assembly of collagen fibrils and other multimeric structures_Homo sapiens_R-HSA-2022090	1954-02-01	0.213889	0.490535	0.2594	0.590605	0.54892	-0.846599	MMP13;MMP3
278	Signaling by NOTCH1_Homo sapiens_R-HSA-1980143	1972-01-01	0.687577	0.795607	0.728392	0.847881	2.2902	-0.857866	MAML2
279	Translocation of GLUT4 to the plasma membrane_Homo sapiens_R-HSA-1445148	1960-02-01	0.249371	0.521299	0.298737	0.608518	0.619273	-0.860054	MYH6;MYH7
280	Pre-NOTCH Expression and Processing_Homo sapiens_R-HSA-1912422	1957-02-01	0.231587	0.506168	0.279086	0.607421	0.603658	-0.883032	MOV10;MAML2
281	O-linked glycosylation_Homo sapiens_R-HSA-5173105	2/110	0.527639	0.673195	0.590963	0.748457	1.38787	-0.887327	ADAMTS19;ST6GALNAC3
282	SUMOylation_Homo sapiens_R-HSA-2990846	2/101	0.482309	0.644726	0.545259	0.722364	1.23356	-0.899477	SP100;PML
283	Cytochrome P450 - arranged by substrate type_Homo sapiens_R-HSA-211897	1962-02-01	0.261252	0.521299	0.311794	0.619086	0.678541	-0.910785	CYP2J2;CYP2S1
284	TNFR2 non-canonical NF-kB pathway_Homo sapiens_R-HSA-5668541	1995-02-01	0.450642	0.629198	0.512888	0.708594	1.1475	-0.914651	TNFSF18;TNFSF13B
285	Amyloid fiber formation_Homo sapiens_R-HSA-977225	1968-02-01	0.296873	0.545933	0.350615	0.651585	0.753924	-0.915602	UBE2L6;TGFBI
286	Toll Like Receptor 9 (TLR9) Cascade_Homo sapiens_R-HSA-168138	1988-02-01	0.412358	0.59589	0.473274	0.683305	1.04869	-0.929	MAPK10;FOS
287	Transport of inorganic cations/anions and amino acids/oligopeptides_Homo sapiens_R-HSA-425393	1999-02-01	0.471877	0.641555	0.534635	0.718426	1.24751	-0.936927	SLC9A9;SLC8A1
288	MyD88 dependent cascade initiated on endosome_Homo sapiens_R-HSA-975155	1985-02-01	0.39555	0.590475	0.455718	0.681199	1.01177	-0.938394	MAPK10;FOS
289	Platelet degranulation_Homo sapiens_R-HSA-114608	2/105	0.502787	0.656029	0.565999	0.731139	1.36853	-0.940983	PDGFB;A2M
290	MyD88 cascade initiated on plasma membrane_Homo sapiens_R-HSA-975871	1982-02-01	0.378525	0.587102	0.437834	0.681199	0.973666	-0.94589	MAPK10;FOS
291	SUMO E3 ligases SUMOylate target proteins_Homo sapiens_R-HSA-3108232	1996-02-01	0.455996	0.630229	0.518387	0.708594	1.206	-0.947033	SP100;PML
292	Signaling by TGF-beta Receptor Complex_Homo sapiens_R-HSA-170834	1973-02-01	0.326366	0.563566	0.382397	0.651585	0.846601	-0.947969	SMAD3;PARD3
293	Toll Like Receptor 7/8 (TLR7/8) Cascade_Homo sapiens_R-HSA-168181	1985-02-01	0.39555	0.590475	0.455718	0.681199	1.02321	-0.949002	MAPK10;FOS
294	Toll Like Receptor 10 (TLR10) Cascade_Homo sapiens_R-HSA-168142	1982-02-01	0.378525	0.587102	0.437834	0.681199	0.981848	-0.953838	MAPK10;FOS
295	L1CAM interactions_Homo sapiens_R-HSA-373760	1996-02-01	0.455996	0.630229	0.518387	0.708594	1.21651	-0.955291	NRCAM;EPHB2
296	MyD88:Mal cascade initiated on plasma membrane_Homo sapiens_R-HSA-166058	1992-02-01	0.434403	0.611469	0.496148	0.702199	1.14599	-0.955508	MAPK10;FOS
297	SUMOylation of DNA damage response and repair proteins_Homo sapiens_R-HSA-3108214	1975-02-01	0.338077	0.563566	0.394929	0.653589	0.88449	-0.959212	SP100;PML
298	Toll Like Receptor 5 (TLR5) Cascade_Homo sapiens_R-HSA-168176	1982-02-01	0.378525	0.587102	0.437834	0.681199	0.990481	-0.962225	MAPK10;FOS
299	Toll Like Receptor 2 (TLR2) Cascade_Homo sapiens_R-HSA-181438	1992-02-01	0.434403	0.611469	0.496148	0.702199	1.15457	-0.962663	MAPK10;FOS
300	TRAF6 mediated induction of NFkB and MAP kinases upon TLR7/8 or 9 activation_Homo sapiens_R-HSA-975138	1983-02-01	0.384223	0.587102	0.443831	0.681199	1.00693	-0.96316	MAPK10;FOS
301	Toll Like Receptor TLR1:TLR2 Cascade_Homo sapiens_R-HSA-168179	1992-02-01	0.434403	0.611469	0.496148	0.702199	1.16364	-0.97022	MAPK10;FOS
302	Toll Like Receptor TLR6:TLR2 Cascade_Homo sapiens_R-HSA-168188	1992-02-01	0.434403	0.611469	0.496148	0.702199	1.17094	-0.976311	MAPK10;FOS
303	Transport of glucose and other sugars, bile salts and organic acids, metal ions and amine compounds_Homo sapiens_R-HSA-425366	2/101	0.482309	0.644726	0.545259	0.722364	1.34437	-0.980274	HEPH;SLC18A1
304	Visual phototransduction_Homo sapiens_R-HSA-2187338	1997-02-01	0.461321	0.63218	0.523844	0.714082	1.28481	-0.994007	PRKCA;AKR1C4
305	Signaling by FGFR in disease_Homo sapiens_R-HSA-1226099	1963-01-01	0.63859	0.75009	0.680862	0.808914	2.27253	-1.01921	STAT1
306	Binding and Uptake of Ligands by Scavenger Receptors_Homo sapiens_R-HSA-2173782	1974-02-01	0.332229	0.563566	0.388677	0.651936	0.944041	-1.04027	COLEC12;APOL1
307	Circadian Clock_Homo sapiens_R-HSA-400253	1963-01-01	0.63859	0.75009	0.680862	0.808914	2.32717	-1.04372	HELZ2
308	Diseases of glycosylation_Homo sapiens_R-HSA-3781865	1988-02-01	0.412358	0.59589	0.473274	0.683305	1.18379	-1.04868	VCAN;ADAMTS19
309	p75 NTR receptor-mediated signalling_Homo sapiens_R-HSA-193704	1983-02-01	0.384223	0.587102	0.443831	0.681199	1.09726	-1.04956	MCF2;FGD2
310	Lipid digestion, mobilization, and transport_Homo sapiens_R-HSA-73923	1971-02-01	0.314601	0.558094	0.369758	0.651585	0.907854	-1.04989	CETP;A2M
311	Collagen formation_Homo sapiens_R-HSA-1474290	1985-02-01	0.39555	0.590475	0.455718	0.681199	1.13571	-1.05335	MMP13;MMP3
312	Metabolism of nucleotides_Homo sapiens_R-HSA-15869	1987-02-01	0.40678	0.59589	0.46746	0.683305	1.1716	-1.05383	UPP2;AK8
313	TP53 Regulates Metabolic Genes_Homo sapiens_R-HSA-5628897	1984-02-01	0.389898	0.590475	0.449792	0.681199	1.12065	-1.05551	MOV10;TP63
314	Triglyceride Biosynthesis_Homo sapiens_R-HSA-75109	1966-01-01	0.655716	0.766728	0.697559	0.823088	2.54779	-1.07524	MOGAT1
315	Class B/2 (Secretin family receptors)_Homo sapiens_R-HSA-373080	1984-02-01	0.389898	0.590475	0.449792	0.681199	1.15228	-1.0853	GNGT2;GNG12
316	O-linked glycosylation of mucins_Homo sapiens_R-HSA-913709	1966-01-01	0.655716	0.766728	0.697559	0.823088	2.5796	-1.08866	ST6GALNAC3
317	Diseases associated with O-glycosylation of proteins_Homo sapiens_R-HSA-3906995	1962-01-01	0.632695	0.748256	0.675095	0.808914	2.50536	-1.14687	ADAMTS19
318	Synthesis of substrates in N-glycan biosythesis_Homo sapiens_R-HSA-446219	1963-01-01	0.63859	0.75009	0.680862	0.808914	2.56788	-1.15167	ST6GALNAC3
319	TP53 Regulates Transcription of DNA Repair Genes_Homo sapiens_R-HSA-6796648	1961-01-01	0.626704	0.742866	0.669225	0.804312	2.46714	-1.15285	FOS
320	Cell-cell junction organization_Homo sapiens_R-HSA-421270	1961-01-01	0.626704	0.742866	0.669225	0.804312	2.59926	-1.21458	PARD3
321	Constitutive Signaling by NOTCH1 HD+PEST Domain Mutants_Homo sapiens_R-HSA-2894862	1957-01-01	0.60175	0.721543	0.644671	0.787594	2.42464	-1.23151	MAML2
322	Constitutive Signaling by NOTCH1 PEST Domain Mutants_Homo sapiens_R-HSA-2644606	1957-01-01	0.60175	0.721543	0.644671	0.787594	2.43713	-1.23785	MAML2
323	Signaling by NOTCH1 HD+PEST Domain Mutants in Cancer_Homo sapiens_R-HSA-2894858	1957-01-01	0.60175	0.721543	0.644671	0.787594	2.45407	-1.24645	MAML2
324	Signaling by NOTCH1 in Cancer_Homo sapiens_R-HSA-2644603	1957-01-01	0.60175	0.721543	0.644671	0.787594	2.46462	-1.25181	MAML2
325	Signaling by NOTCH1 PEST Domain Mutants in Cancer_Homo sapiens_R-HSA-2644602	1957-01-01	0.60175	0.721543	0.644671	0.787594	2.4741	-1.25663	MAML2
326	Initial triggering of complement_Homo sapiens_R-HSA-166663	1958-01-01	0.60814	0.725845	0.650975	0.791561	2.6851	-1.33543	C1QB
327	Regulation of cholesterol biosynthesis by SREBP (SREBF)_Homo sapiens_R-HSA-1655829	1955-01-01	0.588656	0.715784	0.631724	0.782854	2.66038	-1.40977	HELZ2
328	ECM proteoglycans_Homo sapiens_R-HSA-3000178	1955-01-01	0.588656	0.715784	0.631724	0.782854	2.7729	-1.4694	VCAN
329	Ion transport by P-type ATPases_Homo sapiens_R-HSA-936837	1955-01-01	0.588656	0.715784	0.631724	0.782854	2.78119	-1.47379	ATP10A
330	Ion homeostasis_Homo sapiens_R-HSA-5578775	1951-01-01	0.561167	0.697085	0.604405	0.756236	2.5629	-1.48068	SLC8A1
331	Nuclear Envelope Breakdown_Homo sapiens_R-HSA-2980766	1951-01-01	0.561167	0.697085	0.604405	0.756236	2.62511	-1.51662	PRKCA
332	Arachidonic acid metabolism_Homo sapiens_R-HSA-2142753	1953-01-01	0.575133	0.709943	0.618307	0.771767	2.777	-1.53611	CYP2J2
333	Nuclear Receptor transcription pathway_Homo sapiens_R-HSA-383280	1951-01-01	0.561167	0.697085	0.604405	0.756236	2.76497	-1.59742	ESR1
334	Phospholipase C-mediated cascade; FGFR2_Homo sapiens_R-HSA-5654221	1949-01-01	0.546744	0.685746	0.59	0.748457	2.70463	-1.63299	PRKCA
335	Death Receptor Signalling_Homo sapiens_R-HSA-73887	1948-01-01	0.539356	0.68143	0.582603	0.745156	2.67977	-1.65444	TNFSF10
336	NOTCH1 Intracellular Domain Regulates Transcription_Homo sapiens_R-HSA-2122947	1947-01-01	0.531848	0.675238	0.575073	0.737346	2.69512	-1.7017	MAML2
337	Mitochondrial biogenesis_Homo sapiens_R-HSA-1592230	1949-01-01	0.546744	0.685746	0.59	0.748457	2.86386	-1.72913	HELZ2
338	Phospholipase C-mediated cascade: FGFR1_Homo sapiens_R-HSA-5654219	1947-01-01	0.531848	0.675238	0.575073	0.737346	2.75417	-1.73898	PRKCA
339	Creation of C4 and C2 activators_Homo sapiens_R-HSA-166786	1949-01-01	0.546744	0.685746	0.59	0.748457	2.91575	-1.76046	C1QB
340	Phospholipase C-mediated cascade; FGFR4_Homo sapiens_R-HSA-5654228	1946-01-01	0.524217	0.670791	0.567409	0.731139	2.78571	-1.79914	PRKCA
341	Chondroitin sulfate/dermatan sulfate metabolism_Homo sapiens_R-HSA-1793185	1950-01-01	0.554014	0.693186	0.597266	0.752759	3.08806	-1.8237	VCAN
342	Transcriptional activity of SMAD2/SMAD3:SMAD4 heterotrimer_Homo sapiens_R-HSA-2173793	1944-01-01	0.508583	0.658616	0.551665	0.722763	2.73052	-1.84618	SMAD3
343	G-protein mediated events_Homo sapiens_R-HSA-112040	1945-01-01	0.516463	0.665493	0.559607	0.726507	2.90274	-1.91799	PRKCA
344	Phospholipase C-mediated cascade; FGFR3_Homo sapiens_R-HSA-5654227	1944-01-01	0.508583	0.658616	0.551665	0.722763	2.88897	-1.95331	PRKCA
345	Scavenging of heme from plasma_Homo sapiens_R-HSA-2168880	1946-01-01	0.524217	0.670791	0.567409	0.731139	3.04172	-1.96449	APOL1
346	PLC beta mediated events_Homo sapiens_R-HSA-112043	1944-01-01	0.508583	0.658616	0.551665	0.722763	2.96845	-2.00705	PRKCA
347	TP53 Regulates Transcription of Cell Death Genes_Homo sapiens_R-HSA-5633008	1943-01-01	0.500575	0.654793	0.543581	0.722364	2.92651	-2.02514	TP63
348	BMAL1:CLOCK,NPAS2 activates circadian gene expression_Homo sapiens_R-HSA-1368108	1942-01-01	0.492437	0.649852	0.535352	0.718426	2.90168	-2.05552	HELZ2
349	ABC-family proteins mediated transport_Homo sapiens_R-HSA-382556	1945-01-01	0.516463	0.665493	0.559607	0.726507	3.11973	-2.06136	ABCC11
350	Signaling by FGFR1 in disease_Homo sapiens_R-HSA-5655302	1938-01-01	0.458541	0.630229	0.500937	0.702492	2.72261	-2.12283	STAT1
351	Classical antibody-mediated complement activation_Homo sapiens_R-HSA-173623	1943-01-01	0.500575	0.654793	0.543581	0.722364	3.11391	-2.15482	C1QB
352	Voltage gated Potassium channels_Homo sapiens_R-HSA-1296072	1943-01-01	0.500575	0.654793	0.543581	0.722364	3.1446	-2.17606	KCNV2
353	Activation of gene expression by SREBF (SREBP)_Homo sapiens_R-HSA-2426168	1942-01-01	0.492437	0.649852	0.535352	0.718426	3.08311	-2.18404	HELZ2
354	Retinoid metabolism and transport_Homo sapiens_R-HSA-975634	1942-01-01	0.492437	0.649852	0.535352	0.718426	3.11302	-2.20523	AKR1C4
355	Activation of NMDA receptor upon glutamate binding and postsynaptic events_Homo sapiens_R-HSA-442755	1939-01-01	0.467221	0.636896	0.509771	0.708594	2.9793	-2.26711	GRIA3
356	Elastic fibre formation_Homo sapiens_R-HSA-1566948	1941-01-01	0.484167	0.644726	0.526976	0.714591	3.12841	-2.26912	BMP10
357	Class C/3 (Metabotropic glutamate/pheromone receptors)_Homo sapiens_R-HSA-420499	1940-01-01	0.475762	0.641784	0.51845	0.708594	3.06856	-2.27944	TAS2R40
358	Transcriptional activation of mitochondrial biogenesis_Homo sapiens_R-HSA-2151201	1940-01-01	0.475762	0.641784	0.51845	0.708594	3.07083	-2.28112	HELZ2
359	Histidine, lysine, phenylalanine, tyrosine, proline and tryptophan catabolism_Homo sapiens_R-HSA-6788656	1941-01-01	0.484167	0.644726	0.526976	0.714591	3.21677	-2.3332	KMO
360	PKMTs methylate histone lysines_Homo sapiens_R-HSA-3214841	1940-01-01	0.475762	0.641784	0.51845	0.708594	3.21081	-2.38511	PRDM16
361	MAP2K and MAPK activation_Homo sapiens_R-HSA-5674135	1938-01-01	0.458541	0.630229	0.500937	0.702492	3.22768	-2.51664	IL17RD
362	Steroid hormones_Homo sapiens_R-HSA-209943	1937-01-01	0.449721	0.629198	0.491944	0.702199	3.23048	-2.58157	LGMN
363	O-glycosylation of TSR domain-containing proteins_Homo sapiens_R-HSA-5173214	1938-01-01	0.458541	0.630229	0.500937	0.702492	3.32828	-2.59508	ADAMTS19
364	Gamma carboxylation, hypusine formation and arylsulfatase activation_Homo sapiens_R-HSA-163841	1939-01-01	0.467221	0.636896	0.509771	0.708594	3.44718	-2.62314	F9
365	Defective B3GALTL causes Peters-plus syndrome (PpS)_Homo sapiens_R-HSA-5083635	1937-01-01	0.449721	0.629198	0.491944	0.702199	3.33503	-2.66512	ADAMTS19
366	Oncogene Induced Senescence_Homo sapiens_R-HSA-2559585	1932-01-01	0.403421	0.593671	0.444507	0.681199	2.94417	-2.67265	MOV10
367	SMAD2/SMAD3:SMAD4 heterotrimer regulates transcription_Homo sapiens_R-HSA-2173796	1932-01-01	0.403421	0.593671	0.444507	0.681199	3.05694	-2.77501	SMAD3
368	TGF-beta receptor signaling activates SMADs_Homo sapiens_R-HSA-2173789	1932-01-01	0.403421	0.593671	0.444507	0.681199	3.06592	-2.78316	SMAD3
369	FGFR1 mutant receptor activation_Homo sapiens_R-HSA-1839124	2018-01-31	0.393705	0.590475	0.434505	0.681199	3.0408	-2.83449	STAT1
370	CD28 co-stimulation_Homo sapiens_R-HSA-389356	1933-01-01	0.412982	0.59589	0.454334	0.681199	3.27545	-2.89665	CD80
371	HSF1-dependent transactivation_Homo sapiens_R-HSA-3371571	1934-01-01	0.42239	0.601093	0.463988	0.682801	3.43737	-2.96242	CRYBA4
372	Striated Muscle Contraction_Homo sapiens_R-HSA-390522	1934-01-01	0.42239	0.601093	0.463988	0.682801	3.48119	-3.00019	MYH6
373	EGFR interacts with phospholipase C-gamma_Homo sapiens_R-HSA-212718	1934-01-01	0.42239	0.601093	0.463988	0.682801	3.54348	-3.05387	PRKCA
374	PLC-gamma1 signalling_Homo sapiens_R-HSA-167021	1934-01-01	0.42239	0.601093	0.463988	0.682801	3.58238	-3.08739	PRKCA
375	The phototransduction cascade_Homo sapiens_R-HSA-2514856	1934-01-01	0.42239	0.601093	0.463988	0.682801	3.62439	-3.1236	PRKCA
376	Activation of BH3-only proteins_Homo sapiens_R-HSA-114452	2018-01-29	0.373798	0.58675	0.413959	0.672197	3.25772	-3.20572	TP63
377	Inactivation, recovery and regulation of the phototransduction cascade_Homo sapiens_R-HSA-2514859	1933-01-01	0.412982	0.59589	0.454334	0.681199	3.66395	-3.24022	PRKCA
378	IKK complex recruitment mediated by RIP1_Homo sapiens_R-HSA-937041	2018-01-24	0.321133	0.558211	0.359292	0.651585	2.90229	-3.29672	TLR3
379	DAG and IP3 signaling_Homo sapiens_R-HSA-1489509	1932-01-01	0.403421	0.593671	0.444507	0.681199	3.66701	-3.32882	PRKCA
380	Glucagon signaling in metabolic regulation_Homo sapiens_R-HSA-163359	1933-01-01	0.412982	0.59589	0.454334	0.681199	3.76541	-3.32995	GNG12
381	Molecules associated with elastic fibres_Homo sapiens_R-HSA-2129379	2018-01-30	0.383832	0.587102	0.424323	0.676542	3.55418	-3.4033	BMP10
382	Downregulation of TGF-beta receptor signaling_Homo sapiens_R-HSA-2173788	2018-01-26	0.342709	0.563566	0.381742	0.651585	3.18486	-3.41059	SMAD3
383	HSF1 activation_Homo sapiens_R-HSA-3371511	2018-01-29	0.373798	0.58675	0.413959	0.672197	3.50436	-3.44843	CRYBA4
384	Sialic acid metabolism_Homo sapiens_R-HSA-4085001	1933-01-01	0.412982	0.59589	0.454334	0.681199	3.94444	-3.48827	ST6GALNAC3
385	Downregulation of SMAD2/3:SMAD4 transcriptional activity_Homo sapiens_R-HSA-2173795	2018-01-23	0.310081	0.555942	0.347765	0.651585	2.99283	-3.50436	SMAD3
386	Tight junction interactions_Homo sapiens_R-HSA-420029	2018-01-30	0.383832	0.587102	0.424323	0.676542	3.68707	-3.53055	PARD3
387	PIWI-interacting RNA (piRNA) biogenesis_Homo sapiens_R-HSA-5601884	2018-01-29	0.373798	0.58675	0.413959	0.672197	3.76272	-3.70266	TDRD1
388	YAP1- and WWTR1 (TAZ)-stimulated gene expression_Homo sapiens_R-HSA-2032785	2018-01-29	0.373798	0.58675	0.413959	0.672197	3.77787	-3.71757	HELZ2
389	RORA activates gene expression_Homo sapiens_R-HSA-1368082	2018-01-27	0.353239	0.570025	0.392672	0.651936	3.5727	-3.71779	HELZ2
390	Platelet calcium homeostasis_Homo sapiens_R-HSA-418360	2018-01-27	0.353239	0.570025	0.392672	0.651936	3.65128	-3.79955	SLC8A1
391	Amine compound SLC transporters_Homo sapiens_R-HSA-425428	2018-01-30	0.383832	0.587102	0.424323	0.676542	3.99862	-3.82888	SLC18A1
392	Diseases of Immune System_Homo sapiens_R-HSA-5260271	2018-01-24	0.321133	0.558211	0.359292	0.651585	3.39928	-3.86125	TLR3
393	Ca-dependent events_Homo sapiens_R-HSA-111996	2018-01-28	0.363601	0.581313	0.40341	0.665498	3.83113	-3.87594	PRKCA
394	Diseases associated with the TLR signaling cascade_Homo sapiens_R-HSA-5602358	2018-01-24	0.321133	0.558211	0.359292	0.651585	3.41362	-3.87753	TLR3
395	Effects of PIP2 hydrolysis_Homo sapiens_R-HSA-114508	2018-01-27	0.353239	0.570025	0.392672	0.651936	3.73519	-3.88687	DGKH
396	CTLA4 inhibitory signaling_Homo sapiens_R-HSA-389513	2018-01-22	0.298851	0.545933	0.336032	0.642305	3.21927	-3.88827	CD80
397	Attenuation phase_Homo sapiens_R-HSA-3371568	2018-01-26	0.342709	0.563566	0.381742	0.651585	3.74897	-4.01467	CRYBA4
398	CD28 dependent PI3K/Akt signaling_Homo sapiens_R-HSA-389357	2018-01-22	0.298851	0.545933	0.336032	0.642305	3.3275	-4.01899	CD80
399	Fertilization_Homo sapiens_R-HSA-1187000	2018-01-26	0.342709	0.563566	0.381742	0.651585	3.77491	-4.04245	ADAM21
400	Reproduction_Homo sapiens_R-HSA-1474165	2018-01-26	0.342709	0.563566	0.381742	0.651585	3.78381	-4.05198	ADAM21
401	Activation of IRF3/IRF7 mediated by TBK1/IKK epsilon_Homo sapiens_R-HSA-936964	2018-01-18	0.252076	0.521299	0.286966	0.608518	2.95817	-4.07644	TLR3
402	Uptake and actions of bacterial toxins_Homo sapiens_R-HSA-5339562	2018-01-27	0.353239	0.570025	0.392672	0.651936	3.93043	-4.09005	SYT1
403	Diseases associated with glycosaminoglycan metabolism_Homo sapiens_R-HSA-3560782	2018-01-26	0.342709	0.563566	0.381742	0.651585	3.8407	-4.1129	VCAN
404	Calmodulin induced events_Homo sapiens_R-HSA-111933	2018-01-26	0.342709	0.563566	0.381742	0.651585	3.87826	-4.15313	PRKCA
405	Metal ion SLC transporters_Homo sapiens_R-HSA-425410	2018-01-25	0.332008	0.563566	0.370616	0.651585	3.79257	-4.18167	HEPH
406	CaM pathway_Homo sapiens_R-HSA-111997	2018-01-26	0.342709	0.563566	0.381742	0.651585	3.91012	-4.18724	PRKCA
407	Interaction between L1 and Ankyrins_Homo sapiens_R-HSA-445095	2018-01-29	0.373798	0.58675	0.413959	0.672197	4.30831	-4.23955	NRCAM
408	Synthesis and interconversion of nucleotide di- and triphosphates_Homo sapiens_R-HSA-499943	2018-01-25	0.332008	0.563566	0.370616	0.651585	3.85828	-4.25413	AK8
409	Interleukin-6 family signaling_Homo sapiens_R-HSA-6783589	2018-01-27	0.353239	0.570025	0.392672	0.651936	4.09223	-4.25842	STAT1
410	Glutamate Neurotransmitter Release Cycle_Homo sapiens_R-HSA-210500	2018-01-24	0.321133	0.558211	0.359292	0.651585	3.75621	-4.26668	SYT1
411	Termination of O-glycan biosynthesis_Homo sapiens_R-HSA-977068	2018-01-26	0.342709	0.563566	0.381742	0.651585	3.99021	-4.27301	ST6GALNAC3
412	A tetrasaccharide linker sequence is required for GAG synthesis_Homo sapiens_R-HSA-1971475	2018-01-26	0.342709	0.563566	0.381742	0.651585	3.99853	-4.28192	VCAN
413	Regulation of TP53 Activity through Acetylation_Homo sapiens_R-HSA-6804758	2018-01-23	0.310081	0.555942	0.347765	0.651585	3.70334	-4.33632	PML
414	Pyrimidine metabolism_Homo sapiens_R-HSA-73848	2018-01-24	0.321133	0.558211	0.359292	0.651585	3.85954	-4.38405	UPP2
415	TRP channels_Homo sapiens_R-HSA-3295583	2018-01-25	0.332008	0.563566	0.370616	0.651585	4.05023	-4.46577	MCOLN2
416	Syndecan interactions_Homo sapiens_R-HSA-3000170	2018-01-20	0.275839	0.523388	0.311933	0.619086	3.52853	-4.54453	PRKCA
417	SALM protein interactions at the synapse_Homo sapiens_R-HSA-8849932	2018-01-22	0.298851	0.545933	0.336032	0.642305	3.99104	-4.82042	GRIA3
418	Laminin interactions_Homo sapiens_R-HSA-3000157	2018-01-23	0.310081	0.555942	0.347765	0.651585	4.14112	-4.84892	NID1
419	Phase 4 - resting membrane potential_Homo sapiens_R-HSA-5576886	2018-01-19	0.264053	0.521299	0.29956	0.608518	3.66075	-4.87468	KCNK13
420	TRAF6 mediated induction of TAK1 complex_Homo sapiens_R-HSA-937072	2018-01-16	0.227534	0.501544	0.261098	0.590605	3.3149	-4.90756	TLR3
421	TGF-beta receptor signaling in EMT (epithelial to mesenchymal transition)_Homo sapiens_R-HSA-2173791	2018-01-16	0.227534	0.501544	0.261098	0.590605	3.42484	-5.07032	PARD3
422	TP53 Regulates Transcription of Genes Involved in Cytochrome C Release_Homo sapiens_R-HSA-6803204	2018-01-19	0.264053	0.521299	0.29956	0.608518	4.0396	-5.37915	TP63
423	Regulation of Insulin-like Growth Factor (IGF) transport and uptake by Insulin-like Growth Factor Binding Proteins (IGFBPs)_Homo sapiens_R-HSA-381426	2018-01-21	0.287438	0.535585	0.32409	0.633503	4.34973	-5.42302	PAPPA
424	Signaling by cytosolic FGFR1 fusion mutants_Homo sapiens_R-HSA-1839117	2018-01-18	0.252076	0.521299	0.286966	0.608518	3.97787	-5.48161	STAT1
425	HS-GAG degradation_Homo sapiens_R-HSA-2024096	2018-01-21	0.287438	0.535585	0.32409	0.633503	4.45349	-5.55239	HPSE
426	Regulated Necrosis_Homo sapiens_R-HSA-5218859	2018-01-16	0.227534	0.501544	0.261098	0.590605	3.76268	-5.57048	TNFSF10
427	RIPK1-mediated regulated necrosis_Homo sapiens_R-HSA-5213460	2018-01-16	0.227534	0.501544	0.261098	0.590605	3.82332	-5.66024	TNFSF10
428	Cytosolic sulfonation of small molecules_Homo sapiens_R-HSA-156584	2018-01-18	0.252076	0.521299	0.286966	0.608518	4.14094	-5.70633	SULT4A1
429	Norepinephrine Neurotransmitter Release Cycle_Homo sapiens_R-HSA-181430	2018-01-18	0.252076	0.521299	0.286966	0.608518	4.15024	-5.71914	SYT1
430	Defective B3GALT6 causes EDSP2 and SEMDJL1_Homo sapiens_R-HSA-4420332	2018-01-19	0.264053	0.521299	0.29956	0.608518	4.35367	-5.79737	VCAN
431	Defective B3GAT3 causes JDSSDHD_Homo sapiens_R-HSA-3560801	2018-01-19	0.264053	0.521299	0.29956	0.608518	4.3696	-5.81858	VCAN
432	Unblocking of NMDA receptor, glutamate binding and activation_Homo sapiens_R-HSA-438066	2018-01-17	0.239904	0.515644	0.274146	0.599189	4.07692	-5.81988	GRIA3
433	Defective B4GALT7 causes EDS, progeroid type_Homo sapiens_R-HSA-3560783	2018-01-19	0.264053	0.521299	0.29956	0.608518	4.39008	-5.84585	VCAN
434	Amine-derived hormones_Homo sapiens_R-HSA-209776	2018-01-18	0.252076	0.521299	0.286966	0.608518	4.3938	-6.05477	TPH1
435	TNF receptor superfamily (TNFSF) members mediating non-canonical NF-kB pathway_Homo sapiens_R-HSA-5676594	2018-01-17	0.239904	0.515644	0.274146	0.599189	4.31481	-6.15946	TNFSF13B
436	GABA synthesis, release, reuptake and degradation_Homo sapiens_R-HSA-888590	2018-01-19	0.264053	0.521299	0.29956	0.608518	4.69873	-6.25686	SYT1
437	Nucleotide-like (purinergic) receptors_Homo sapiens_R-HSA-418038	2018-01-16	0.227534	0.501544	0.261098	0.590605	4.25408	-6.29797	P2RY6
438	Acetylcholine Neurotransmitter Release Cycle_Homo sapiens_R-HSA-264642	2018-01-17	0.239904	0.515644	0.274146	0.599189	4.43031	-6.32435	SYT1
439	CD22 mediated BCR regulation_Homo sapiens_R-HSA-5690714	2018-01-18	0.252076	0.521299	0.286966	0.608518	4.61297	-6.35679	CD22
440	Na+/Cl- dependent neurotransmitter transporters_Homo sapiens_R-HSA-442660	2018-01-19	0.264053	0.521299	0.29956	0.608518	4.82631	-6.42674	SLC18A1
441	Scavenging by Class A Receptors_Homo sapiens_R-HSA-3000480	2018-01-19	0.264053	0.521299	0.29956	0.608518	4.85161	-6.46042	COLEC12
442	WNT5A-dependent internalization of FZD4_Homo sapiens_R-HSA-5099900	2018-01-15	0.214964	0.490535	0.247816	0.590605	4.20536	-6.46483	PRKCA
443	Signaling by Hippo_Homo sapiens_R-HSA-2028269	2018-01-20	0.275839	0.523388	0.311933	0.619086	5.09619	-6.56357	AMOTL2
444	Regulation of necroptotic cell death_Homo sapiens_R-HSA-5675482	2018-01-14	0.20219	0.476026	0.234297	0.590605	4.13698	-6.61316	TNFSF10
445	JNK (c-Jun kinases) phosphorylation and activation mediated by activated human TAK1_Homo sapiens_R-HSA-450321	2018-01-16	0.227534	0.501544	0.261098	0.590605	4.47922	-6.63129	MAPK10
446	TP53 regulates transcription of several additional cell death genes whose specific roles in p53-dependent apoptosis remain uncertain_Homo sapiens_R-HSA-6803205	2018-01-14	0.20219	0.476026	0.234297	0.590605	4.24929	-6.79268	TP63
447	Chondroitin sulfate biosynthesis_Homo sapiens_R-HSA-2022870	2018-01-20	0.275839	0.523388	0.311933	0.619086	5.40593	-6.96249	VCAN
448	Signaling by NODAL_Homo sapiens_R-HSA-1181150	2018-01-19	0.264053	0.521299	0.29956	0.608518	5.23415	-6.96982	SMAD3
449	Regulation of IFNG signaling_Homo sapiens_R-HSA-877312	2018-01-14	0.20219	0.476026	0.234297	0.590605	4.36588	-6.97906	STAT1
450	Prolactin receptor signaling_Homo sapiens_R-HSA-1170546	2018-01-15	0.214964	0.490535	0.247816	0.590605	4.54143	-6.98146	PRLR
451	Acetylcholine regulates insulin secretion_Homo sapiens_R-HSA-399997	2018-01-10	0.148989	0.469985	0.177764	0.572405	3.75331	-7.14586	PRKCA
452	Sodium/Proton exchangers_Homo sapiens_R-HSA-425986	2018-01-09	0.135145	0.469985	0.162995	0.572405	3.57864	-7.16231	SLC9A9
453	HuR (ELAVL1) binds and stabilizes mRNA_Homo sapiens_R-HSA-450520	2018-01-08	0.121077	0.468043	0.147962	0.572405	3.41649	-7.21334	PRKCA
454	Depolymerisation of the Nuclear Lamina_Homo sapiens_R-HSA-4419969	2018-01-15	0.214964	0.490535	0.247816	0.590605	4.7287	-7.26934	PRKCA
455	Regulation of TP53 Activity through Association with Co-factors_Homo sapiens_R-HSA-6804759	2018-01-14	0.20219	0.476026	0.234297	0.590605	4.68593	-7.49068	TP63
456	CASP8 activity is inhibited_Homo sapiens_R-HSA-5218900	2018-01-11	0.162612	0.469985	0.192275	0.572405	4.12998	-7.50164	TNFSF10
457	Early Phase of HIV Life Cycle_Homo sapiens_R-HSA-162594	2018-01-14	0.20219	0.476026	0.234297	0.590605	4.75874	-7.60706	CCR5
458	Dectin-2 family_Homo sapiens_R-HSA-5621480	2018-01-10	0.148989	0.469985	0.177764	0.572405	4.04492	-7.70105	CLEC4C
459	Dimerization of procaspase-8_Homo sapiens_R-HSA-69416	2018-01-11	0.162612	0.469985	0.192275	0.572405	4.24512	-7.71079	TNFSF10
460	CS/DS degradation_Homo sapiens_R-HSA-2024101	2018-01-14	0.20219	0.476026	0.234297	0.590605	4.93726	-7.89243	VCAN
461	Regulation by c-FLIP_Homo sapiens_R-HSA-3371378	2018-01-11	0.162612	0.469985	0.192275	0.572405	4.37161	-7.94054	TNFSF10
462	P2Y receptors_Homo sapiens_R-HSA-417957	2018-01-12	0.176018	0.469985	0.206531	0.575178	4.63318	-8.04862	P2RY6
463	TRIF-mediated programmed cell death_Homo sapiens_R-HSA-2562578	2018-01-10	0.148989	0.469985	0.177764	0.572405	4.23187	-8.05698	TLR3
464	CD28 dependent Vav1 pathway_Homo sapiens_R-HSA-389359	2018-01-12	0.176018	0.469985	0.206531	0.575178	4.64351	-8.06656	CD80
465	Tandem pore domain potassium channels_Homo sapiens_R-HSA-1296346	2018-01-12	0.176018	0.469985	0.206531	0.575178	4.77102	-8.28808	KCNK13
466	Extrinsic Pathway of Fibrin Clot Formation_Homo sapiens_R-HSA-140834	2018-01-05	0.0774881	0.435211	0.101233	0.563261	3.24656	-8.30351	F9
467	Reduction of cytosolic Ca++ levels_Homo sapiens_R-HSA-418359	2018-01-12	0.176018	0.469985	0.206531	0.575178	4.86471	-8.45083	SLC8A1
468	NICD traffics to nucleus_Homo sapiens_R-HSA-157052	2018-01-13	0.189209	0.476026	0.220537	0.590605	5.17017	-8.60781	MAML2
469	Notch-HLH transcription pathway_Homo sapiens_R-HSA-350054	2018-01-13	0.189209	0.476026	0.220537	0.590605	5.17704	-8.61927	MAML2
470	Fatty acids_Homo sapiens_R-HSA-211935	2018-01-15	0.214964	0.490535	0.247816	0.590605	5.61284	-8.62853	CYP2J2
471	TP53 Regulates Transcription of Caspase Activators and Caspases_Homo sapiens_R-HSA-6803207	2018-01-12	0.176018	0.469985	0.206531	0.575178	5.00979	-8.70286	TP63
472	Pyrimidine catabolism_Homo sapiens_R-HSA-73621	2018-01-12	0.176018	0.469985	0.206531	0.575178	5.02039	-8.72127	UPP2
473	Metallothioneins bind metals_Homo sapiens_R-HSA-5661231	2018-01-11	0.162612	0.469985	0.192275	0.572405	4.82723	-8.76811	MT2A
474	Signaling by Activin_Homo sapiens_R-HSA-1502540	2018-01-13	0.189209	0.476026	0.220537	0.590605	5.29982	-8.82367	SMAD3
475	Response to metal ions_Homo sapiens_R-HSA-5660526	2018-01-11	0.162612	0.469985	0.192275	0.572405	4.91473	-8.92706	MT2A
476	CYP2E1 reactions_Homo sapiens_R-HSA-211999	2018-01-11	0.162612	0.469985	0.192275	0.572405	5.00569	-9.09228	CYP2S1
477	Acetylcholine Binding And Downstream Events_Homo sapiens_R-HSA-181431	2018-01-14	0.20219	0.476026	0.234297	0.590605	5.74257	-9.17975	CHRNB2
478	Tryptophan catabolism_Homo sapiens_R-HSA-71240	2018-01-11	0.162612	0.469985	0.192275	0.572405	5.05902	-9.18913	KMO
479	Activation of Nicotinic Acetylcholine Receptors_Homo sapiens_R-HSA-629602	2018-01-14	0.20219	0.476026	0.234297	0.590605	5.80489	-9.27938	CHRNB2
480	Miscellaneous substrates_Homo sapiens_R-HSA-211958	2018-01-12	0.176018	0.469985	0.206531	0.575178	5.37109	-9.3305	CYP2S1
481	Postsynaptic nicotinic acetylcholine receptors_Homo sapiens_R-HSA-622327	2018-01-14	0.20219	0.476026	0.234297	0.590605	5.86108	-9.36919	CHRNB2
482	Dermatan sulfate biosynthesis_Homo sapiens_R-HSA-2022923	2018-01-11	0.162612	0.469985	0.192275	0.572405	5.32922	-9.67993	VCAN
483	Sodium/Calcium exchangers_Homo sapiens_R-HSA-425561	2018-01-11	0.162612	0.469985	0.192275	0.572405	5.40752	-9.82215	SLC8A1
484	Interleukin-6 signaling_Homo sapiens_R-HSA-1059683	2018-01-11	0.162612	0.469985	0.192275	0.572405	5.42486	-9.85365	STAT1
485	Gamma-carboxylation, transport, and amino-terminal cleavage of proteins_Homo sapiens_R-HSA-159854	2018-01-11	0.162612	0.469985	0.192275	0.572405	5.49269	-9.97686	F9
486	Activation of PUMA and translocation to mitochondria_Homo sapiens_R-HSA-139915	2018-01-08	0.121077	0.468043	0.147962	0.572405	4.78618	-10.1052	TP63
487	Gamma-carboxylation of protein precursors_Homo sapiens_R-HSA-159740	2018-01-10	0.148989	0.469985	0.177764	0.572405	5.38609	-10.2545	F9
488	Removal of aminoterminal propeptides from gamma-carboxylated proteins_Homo sapiens_R-HSA-159782	2018-01-10	0.148989	0.469985	0.177764	0.572405	5.52938	-10.5273	F9
489	Defective CHST14 causes EDS, musculocontractural type_Homo sapiens_R-HSA-3595174	2018-01-07	0.10678	0.441484	0.13266	0.563261	4.73418	-10.5903	VCAN
490	Transport of gamma-carboxylated protein precursors from the endoplasmic reticulum to the Golgi apparatus_Homo sapiens_R-HSA-159763	2018-01-09	0.135145	0.469985	0.162995	0.572405	5.3193	-10.6461	F9
491	Presynaptic nicotinic acetylcholine receptors_Homo sapiens_R-HSA-622323	2018-01-12	0.176018	0.469985	0.206531	0.575178	6.16947	-10.7174	CHRNB2
492	Defective CHST3 causes SEDCJD_Homo sapiens_R-HSA-3595172	2018-01-07	0.10678	0.441484	0.13266	0.563261	4.7936	-10.7232	VCAN
493	Reversible hydration of carbon dioxide_Homo sapiens_R-HSA-1475029	2018-01-12	0.176018	0.469985	0.206531	0.575178	6.35558	-11.0407	CA3
494	Pyrimidine salvage reactions_Homo sapiens_R-HSA-73614	2018-01-09	0.135145	0.469985	0.162995	0.572405	5.58131	-11.1705	UPP2
495	Physiological factors_Homo sapiens_R-HSA-5578768	2018-01-12	0.176018	0.469985	0.206531	0.575178	6.54871	-11.3762	NPR1
496	TP53 Regulates Transcription of Death Receptors and Ligands_Homo sapiens_R-HSA-6803211	2018-01-12	0.176018	0.469985	0.206531	0.575178	6.55942	-11.3948	TP63
497	Defective CHSY1 causes TPBS_Homo sapiens_R-HSA-3595177	2018-01-07	0.10678	0.441484	0.13266	0.563261	5.10785	-11.4262	VCAN
498	Interaction With The Zona Pellucida_Homo sapiens_R-HSA-1300644	2018-01-10	0.148989	0.469985	0.177764	0.572405	6.02228	-11.4657	ADAM21
499	TRAIL signaling_Homo sapiens_R-HSA-75158	2018-01-07	0.10678	0.441484	0.13266	0.563261	5.13885	-11.4955	TNFSF10
500	Highly calcium permeable postsynaptic nicotinic acetylcholine receptors_Homo sapiens_R-HSA-629594	2018-01-11	0.162612	0.469985	0.192275	0.572405	6.38079	-11.59	CHRNB2
501	Synthesis of epoxy (EET) and dihydroxyeicosatrienoic acids (DHET)_Homo sapiens_R-HSA-2142670	2018-01-08	0.121077	0.468043	0.147962	0.572405	5.66649	-11.9638	CYP2J2
502	Disinhibition of SNARE formation_Homo sapiens_R-HSA-114516	2018-01-05	0.0774881	0.435211	0.101233	0.563261	4.73182	-12.1022	PRKCA
503	Signaling by TGF-beta Receptor Complex in Cancer_Homo sapiens_R-HSA-3304351	2018-01-08	0.121077	0.468043	0.147962	0.572405	5.94466	-12.5511	SMAD3
504	Highly calcium permeable nicotinic acetylcholine receptors_Homo sapiens_R-HSA-629597	2018-01-09	0.135145	0.469985	0.162995	0.572405	6.30457	-12.618	CHRNB2
505	Orexin and neuropeptides FF and QRFP bind to their respective receptors_Homo sapiens_R-HSA-389397	2018-01-08	0.121077	0.468043	0.147962	0.572405	5.9947	-12.6568	HCRTR2
506	Loss of Function of SMAD2/3 in Cancer_Homo sapiens_R-HSA-3304349	2018-01-07	0.10678	0.441484	0.13266	0.563261	5.8931	-13.1828	SMAD3
507	SMAD2/3 MH2 Domain Mutants in Cancer_Homo sapiens_R-HSA-3315487	2018-01-07	0.10678	0.441484	0.13266	0.563261	5.99592	-13.4128	SMAD3
508	IRF3 mediated activation of type 1 IFN_Homo sapiens_R-HSA-1606341	2018-01-06	0.092252	0.439665	0.117085	0.563261	5.78139	-13.7784	ZBP1
509	Loss of Function of TGFBR1 in Cancer_Homo sapiens_R-HSA-3656534	2018-01-07	0.10678	0.441484	0.13266	0.563261	6.39705	-14.3101	SMAD3
510	SMAD2/3 Phosphorylation Motif Mutants in Cancer_Homo sapiens_R-HSA-3304356	2018-01-06	0.092252	0.439665	0.117085	0.563261	6.04615	-14.4094	SMAD3
511	LDL-mediated lipid transport_Homo sapiens_R-HSA-171052	2018-01-06	0.092252	0.439665	0.117085	0.563261	6.07228	-14.4717	CETP
512	NrCAM interactions_Homo sapiens_R-HSA-447038	2018-01-07	0.10678	0.441484	0.13266	0.563261	6.50155	-14.5438	NRCAM
513	TGFBR1 KD Mutants in Cancer_Homo sapiens_R-HSA-3656532	2018-01-07	0.10678	0.441484	0.13266	0.563261	6.62521	-14.8205	SMAD3
514	Neurofascin interactions_Homo sapiens_R-HSA-447043	2018-01-07	0.10678	0.441484	0.13266	0.563261	6.74554	-15.0897	NRCAM
515	Neurotoxicity of clostridium toxins_Homo sapiens_R-HSA-168799	2018-01-10	0.148989	0.469985	0.177764	0.572405	8.30611	-15.8139	SYT1
516	Serotonin and melatonin biosynthesis_Homo sapiens_R-HSA-209931	2018-01-05	0.0774881	0.435211	0.101233	0.563261	6.71972	-17.1866	TPH1
517	Vitamin D (calciferol) metabolism_Homo sapiens_R-HSA-196791	2018-01-07	0.10678	0.441484	0.13266	0.563261	7.95181	-17.7881	LGMN
518	Highly sodium permeable acetylcholine nicotinic receptors_Homo sapiens_R-HSA-629587	2018-01-07	0.10678	0.441484	0.13266	0.563261	7.96433	-17.8161	CHRNB2

## Sheet: Uninf_5d
	Term	Overlap	P.value	Adjusted.P.value	Old.P.value	Old.Adjusted.P.value	Z.score	Combined.Score	Genes
1	Hemostasis_Homo sapiens_R-HSA-109582	41/552	1.06054e-06	0.00055699	2.52692e-06	0.00165261	-2.14813	29.5513	DOCK6;DGKB;ITGA2B;F13A1;CSF2RB;A1BG;GATA2;SLC7A10;CLU;THBS1;TBXA2R;KIF5C;NOS1;CLEC1B;PF4V1;CD177;SERPINB2;FCER1G;ITGA3;CAV1;F2R;PDE2A;PPBP;ATP1B2;GNG11;RHOB;CD2;SELP;GP9;TF;SLC7A8;P2RX1;KCNMA1;IL2RB;ESAM;DGKK;RAPGEF3;LAT;BCAR1;PF4;F2RL3
2	Defective B3GALTL causes Peters-plus syndrome (PpS)_Homo sapiens_R-HSA-5083635	1937-09-01	2.272e-06	0.00055699	1.28811e-05	0.00206907	-2.09736	27.2549	SEMA5A;ADAMTSL1;ADAMTSL5;THSD7B;ADAMTS1;ADAMTSL2;THSD1;THBS1;ADAMTS7
3	Platelet activation, signaling and aggregation_Homo sapiens_R-HSA-76002	24/253	3.40667e-06	0.00055699	9.67556e-06	0.00206907	-2.13641	26.897	FCER1G;DGKB;ITGA2B;F2R;F13A1;CSF2RB;PPBP;A1BG;GNG11;CLU;THBS1;RHOB;SELP;GP9;TF;TBXA2R;IL2RB;DGKK;CLEC1B;RAPGEF3;LAT;BCAR1;F2RL3;PF4
4	O-glycosylation of TSR domain-containing proteins_Homo sapiens_R-HSA-5173214	1938-09-01	2.89106e-06	0.00055699	1.54867e-05	0.00206907	-2.04871	26.129	SEMA5A;ADAMTSL1;ADAMTSL5;THSD7B;ADAMTS1;ADAMTSL2;THSD1;THBS1;ADAMTS7
5	Transmission across Chemical Synapses_Homo sapiens_R-HSA-112315	21/211	6.56443e-06	0.00081837	1.831e-05	0.00206907	-2.17273	25.9291	GRIA1;KCNJ4;GABBR2;KCNJ5;KCNJ6;CACNA2D1;CACFD1;GABRA3;ADCY4;CACNA2D2;ADCY2;GNG11;GRIN2B;CPLX1;LIN7B;CACNA1E;ADCY6;SLC6A3;CAMKK1;CACNG8;SLC18A2
6	Neuronal System_Homo sapiens_R-HSA-112316	26/301	7.50799e-06	0.00081837	1.89823e-05	0.00206907	-2.18561	25.7891	GRIA1;KCNK6;ADCY4;KCNA3;ADCY2;CPLX1;LIN7B;CACNA1E;ADCY6;SLC6A3;CAMKK1;CACNG8;SLC18A2;KCNJ4;GABBR2;KCNJ5;KCNJ6;KCNH7;CACNA2D1;CACFD1;GABRA3;CACNA2D2;GNG11;GRIN2B;KCNMA1;KCNQ2
7	G alpha (i) signalling events_Homo sapiens_R-HSA-418594	22/240	1.48599e-05	0.0012148	3.71934e-05	0.00347492	-2.11009	23.4575	GABBR2;CXCL6;SUCNR1;PTGDR2;RGS13;ADCY4;OPRK1;ADCY2;PPBP;GNG11;ADCY6;GRM4;LPAR5;CXCR1;CNR2;HRH4;S1PR1;CCR8;RLN3;CCR4;PF4;RGS7
8	O-linked glycosylation_Homo sapiens_R-HSA-5173105	14/110	1.46297e-05	0.0012148	4.33288e-05	0.00354213	-1.96822	21.9111	SEMA5A;ST6GALNAC2;THSD7B;THSD1;THBS1;ADAMTSL1;B3GNT8;ADAMTSL5;ADAMTS1;ADAMTSL2;B3GNT3;GCNT4;GALNTL6;ADAMTS7
9	Adherens junctions interactions_Homo sapiens_R-HSA-418990	2018-07-31	5.23245e-05	0.00380225	0.000180506	0.0131168	-1.87293	18.4634	CDH6;CADM1;CDH11;CDH13;CDH17;CDH18;CDH7
10	Cell surface interactions at the vascular wall_Homo sapiens_R-HSA-202733	12/101	0.000116302	0.00760613	0.000272386	0.0178141	-1.87161	16.9555	CD2;SELP;FCER1G;SLC7A8;ITGA3;CAV1;ESAM;ATP1B2;SLC7A10;PF4V1;PF4;CD177
11	GPCR ligand binding_Homo sapiens_R-HSA-500792	29/447	0.000408788	0.0157263	0.000703212	0.0306601	-2.12673	16.5934	NPFFR2;CXCL6;ADCYAP1R1;SUCNR1;PTGDR2;C5AR2;GRPR;EDNRB;WNT11;GRM4;CXCR1;CNR2;TBXA2R;HRH4;S1PR1;CCR8;CCR4;PTGDR;GABBR2;FZD7;F2R;FZD8;OPRK1;PPBP;GNG11;LPAR5;RLN3;PF4;F2RL3
12	Diseases of glycosylation_Homo sapiens_R-HSA-3781865	1988-11-01	0.000140538	0.00835564	0.000328847	0.0195515	-1.809	16.0459	SEMA5A;ADAMTSL1;ADAMTSL5;THSD7B;ADAMTS1;SDC3;ADAMTSL2;SDC1;THSD1;THBS1;ADAMTS7
13	Activation of GABAB receptors_Homo sapiens_R-HSA-991365	1939-07-01	0.000243756	0.0113869	0.000614003	0.0286827	-1.90304	15.832	KCNJ4;KCNJ5;GABBR2;KCNJ6;ADCY4;ADCY2;ADCY6
14	GABA B receptor activation_Homo sapiens_R-HSA-977444	1939-07-01	0.000243756	0.0113869	0.000614003	0.0286827	-1.88712	15.6996	KCNJ4;KCNJ5;GABBR2;KCNJ6;ADCY4;ADCY2;ADCY6
15	Diseases associated with O-glycosylation of proteins_Homo sapiens_R-HSA-3906995	1962-09-01	0.00017848	0.00972716	0.000429692	0.0234182	-1.79997	15.5356	SEMA5A;ADAMTSL1;ADAMTSL5;THSD7B;ADAMTS1;ADAMTSL2;THSD1;THBS1;ADAMTS7
16	Non-integrin membrane-ECM interactions_Homo sapiens_R-HSA-3000171	1942-07-01	0.000392667	0.0157263	0.000907354	0.0338775	-1.8866	14.7957	DDR1;ITGB5;NRXN1;LAMA4;SDC3;SDC1;THBS1
17	Transmembrane transport of small molecules_Homo sapiens_R-HSA-382551	35/594	0.000645938	0.0192421	0.00103601	0.0338775	-1.97182	14.4826	RYR1;RYR2;AQP10;ADCY4;ADCY2;SLC7A10;ADCY6;SLC6A3;SLC7A3;GLRA3;SLC22A17;SLCO2B1;SLC22A18;TRPM6;SLC18A2;DMTN;SLC30A8;TRPC4;TSC22D3;ABCA4;GABRA3;ABCC6;ATP1B2;MCOLN1;GNG11;GCK;ANO3;ANO1;TF;SLC6A9;SLC7A8;FKBP1B;SLC26A7;SLC26A3;CFTR
18	GABA receptor activation_Homo sapiens_R-HSA-977443	1955-08-01	0.000400585	0.0157263	0.000881814	0.0338775	-1.84436	14.4277	KCNJ4;KCNJ5;GABBR2;KCNJ6;GABRA3;ADCY4;ADCY2;ADCY6
19	Muscle contraction_Homo sapiens_R-HSA-397014	16/196	0.00076753	0.0213673	0.00136321	0.0424543	-1.92302	13.7925	TMOD1;RYR1;KCNJ4;RYR2;KCNK6;ITGB5;CACNA2D1;CACNA2D2;ATP1B2;MYLPF;NPPC;CACNG8;FKBP1B;SCN4A;NOS1;SCN2A
20	Cell junction organization_Homo sapiens_R-HSA-446728	1986-10-01	0.000505313	0.017407	0.00101589	0.0338775	-1.78941	13.5822	CDH6;CADM1;CDH11;CDH13;PARVA;CLDN16;CDH17;FERMT2;CDH18;CDH7
21	Neurotransmitter Receptor Binding And Downstream Transmission In The Postsynaptic Cell_Homo sapiens_R-HSA-112314	13/142	0.000816792	0.0213673	0.00148103	0.043171	-1.90741	13.5619	GRIA1;KCNJ4;KCNJ5;GABBR2;KCNJ6;GABRA3;ADCY4;ADCY2;GNG11;GRIN2B;ADCY6;CAMKK1;CACNG8
22	Cardiac conduction_Homo sapiens_R-HSA-5576891	13/135	0.000505708	0.017407	0.000968118	0.0338775	-1.77032	13.4359	RYR1;KCNJ4;KCNK6;RYR2;CACNA2D1;CACNA2D2;ATP1B2;NPPC;CACNG8;FKBP1B;SCN4A;NOS1;SCN2A
23	Class A/1 (Rhodopsin-like receptors)_Homo sapiens_R-HSA-373076	22/323	0.00105591	0.0265601	0.00175267	0.045447	-1.94559	13.3338	NPFFR2;CXCL6;SUCNR1;PTGDR2;C5AR2;F2R;OPRK1;PPBP;GRPR;EDNRB;LPAR5;CXCR1;CNR2;TBXA2R;HRH4;S1PR1;CCR8;RLN3;CCR4;PTGDR;F2RL3;PF4
24	Extracellular matrix organization_Homo sapiens_R-HSA-1474244	20/283	0.00112433	0.02689	0.00187625	0.045447	-1.9097	12.968	DDR1;COL26A1;ITGB5;CMA1;COL25A1;ITGA3;COL22A1;NRXN1;LAMA4;SDC3;ITGA2B;MMP8;BMP7;THBS1;MMP25;ITGAD;ADAMTS1;COL20A1;SDC1;TNR
25	Cell-cell junction organization_Homo sapiens_R-HSA-421270	1961-08-01	0.000815671	0.0213673	0.0016114	0.0439106	-1.78911	12.7233	CDH6;CADM1;CDH11;CDH13;CLDN16;CDH17;CDH18;CDH7
26	Common Pathway of Fibrin Clot Formation_Homo sapiens_R-HSA-140875	2018-05-22	0.000618966	0.0192421	0.00151824	0.043171	-1.64832	12.1769	F2R;F13A1;PF4V1;CD177;PF4
27	Cell-Cell communication_Homo sapiens_R-HSA-1500931	12/131	0.00127293	0.0287068	0.00221987	0.0518497	-1.79773	11.9844	CDH6;MAPK11;CADM1;DCC;CDH11;CDH13;PARVA;CLDN16;CDH17;FERMT2;CDH18;CDH7
28	Formation of Fibrin Clot (Clotting Cascade)_Homo sapiens_R-HSA-140877	1939-06-01	0.00157767	0.0343933	0.00301991	0.0658341	-1.72739	11.1448	GP9;F2R;F13A1;PF4V1;PF4;CD177
29	Basigin interactions_Homo sapiens_R-HSA-210991	2018-05-25	0.00115125	0.02689	0.00247645	0.0558482	-1.58497	10.7253	SLC7A8;ITGA3;CAV1;ATP1B2;SLC7A10
30	Depolarization of the Presynaptic Terminal Triggers the Opening of Calcium Channels_Homo sapiens_R-HSA-112308	2018-04-13	0.000647288	0.0192421	0.00180875	0.045447	-1.32346	9.71779	CACFD1;CACNA2D1;CACNA2D2;CACNA1E
31	Peptide ligand-binding receptors_Homo sapiens_R-HSA-375276	14/193	0.00470063	0.0853948	0.00708136	0.13232	-1.70329	9.12974	NPFFR2;CXCL6;C5AR2;F2R;OPRK1;PPBP;GRPR;EDNRB;CXCR1;CCR8;RLN3;CCR4;F2RL3;PF4
32	Potassium Channels_Homo sapiens_R-HSA-1296071	1999-09-01	0.00522961	0.0924369	0.00801511	0.141672	-1.64968	8.66647	KCNJ4;KCNJ5;GABBR2;KCNK6;KCNJ6;KCNH7;KCNMA1;KCNQ2;KCNA3
33	Stimuli-sensing channels_Homo sapiens_R-HSA-2672351	9/100	0.00558442	0.0961109	0.00849705	0.146239	-1.60629	8.33307	RYR1;ANO1;RYR2;TRPC4;TSC22D3;FKBP1B;MCOLN1;TRPM6;ANO3
34	Platelet degranulation_Homo sapiens_R-HSA-114608	9/105	0.00764542	0.125003	0.0112444	0.18779	-1.59985	7.79711	SELP;TF;ITGA2B;F13A1;PPBP;A1BG;CLU;THBS1;PF4
35	Developmental Biology_Homo sapiens_R-HSA-1266738	37/786	0.0179909	0.199424	0.0234949	0.278157	-1.87187	7.52095	SEMA5A;RARG;EPAS1;ITGA2B;CSF2RB;RASGRP4;CACNA1H;NTN3;RND1;EFNB2;CACNG8;ABLIM3;CTNNA2;PPARGC1A;EPHA6;TRPC4;DCC;KSR2;HNF1A;MAFA;GRIN2B;DKK1;GCK;RHOB;NR5A1;FGF17;MAPK11;LEP;IL2RB;KCNQ2;FGF18;PLXNB3;SCN4A;HOXB2;SCN2A;EPHA3;LAT
36	Syndecan interactions_Homo sapiens_R-HSA-3000170	2018-04-20	0.00365442	0.0682855	0.00676225	0.130074	-1.27859	7.17522	ITGB5;SDC3;SDC1;THBS1
37	GPVI-mediated activation cascade_Homo sapiens_R-HSA-114604	1953-06-01	0.00754786	0.125003	0.0114856	0.18779	-1.44302	7.05129	FCER1G;IL2RB;CSF2RB;CLEC1B;LAT;RHOB
38	Response to elevated platelet cytosolic Ca2+_Homo sapiens_R-HSA-76005	9/110	0.0102413	0.139538	0.0146093	0.212321	-1.52257	6.97538	SELP;TF;ITGA2B;F13A1;PPBP;A1BG;CLU;THBS1;PF4
39	Activation of G protein gated Potassium channels_Homo sapiens_R-HSA-1296041	2018-04-25	0.0083831	0.127501	0.0133269	0.202692	-1.42807	6.82836	KCNJ4;KCNJ5;GABBR2;KCNJ6
40	Chemokine receptors bind chemokines_Homo sapiens_R-HSA-380108	1956-06-01	0.0098329	0.139538	0.0144684	0.212321	-1.47039	6.79617	CXCL6;CXCR1;CCR8;PPBP;CCR4;PF4
41	G protein gated Potassium channels_Homo sapiens_R-HSA-1296059	2018-04-25	0.0083831	0.127501	0.0133269	0.202692	-1.39925	6.69058	KCNJ4;KCNJ5;GABBR2;KCNJ6
42	Inhibition of voltage gated Ca2+ channels via Gbeta/gamma subunits_Homo sapiens_R-HSA-997272	2018-04-25	0.0083831	0.127501	0.0133269	0.202692	-1.38232	6.60962	KCNJ4;KCNJ5;GABBR2;KCNJ6
43	Phospholipase C-mediated cascade; FGFR3_Homo sapiens_R-HSA-5654227	1944-05-01	0.0141314	0.176446	0.0201863	0.25886	-1.54145	6.5656	FGF17;FGF18;ADCY4;ADCY2;ADCY6
44	G alpha (s) signalling events_Homo sapiens_R-HSA-418555	10/142	0.0187361	0.204223	0.0251152	0.278157	-1.61456	6.4216	ADCYAP1R1;VIPR2;PDE2A;ADCY4;RLN3;ADCY2;VIP;GNG11;ADCY6;PTGDR
45	Phospholipase C-mediated cascade; FGFR4_Homo sapiens_R-HSA-5654228	1946-05-01	0.0169134	0.194449	0.0236147	0.278157	-1.46211	5.96489	FGF17;FGF18;ADCY4;ADCY2;ADCY6
46	Phase 0 - rapid depolarisation_Homo sapiens_R-HSA-5576892	1944-05-01	0.0141314	0.176446	0.0201863	0.25886	-1.3331	5.67813	CACNG8;CACNA2D1;CACNA2D2;SCN4A;SCN2A
47	Inwardly rectifying K+ channels_Homo sapiens_R-HSA-1296065	1931-04-01	0.0178712	0.199424	0.0252855	0.278157	-1.38551	5.57608	KCNJ4;KCNJ5;GABBR2;KCNJ6
48	Aquaporin-mediated transport_Homo sapiens_R-HSA-445717	1951-05-01	0.0253902	0.244194	0.0337605	0.324696	-1.4172	5.20595	AQP10;ADCY4;ADCY2;GNG11;ADCY6
49	Glucagon signaling in metabolic regulation_Homo sapiens_R-HSA-163359	1933-04-01	0.0220825	0.222184	0.0303455	0.320096	-1.33568	5.09292	ADCY4;ADCY2;GNG11;ADCY6
50	Phospholipase C-mediated cascade; FGFR2_Homo sapiens_R-HSA-5654221	1949-05-01	0.0217301	0.222054	0.0294262	0.315488	-1.32348	5.06769	FGF17;FGF18;ADCY4;ADCY2;ADCY6
51	Ion channel transport_Homo sapiens_R-HSA-983712	12/203	0.0359873	0.326885	0.0455097	0.41338	-1.46397	4.86711	RYR1;ANO1;RYR2;GLRA3;TRPC4;TSC22D3;GABRA3;FKBP1B;ATP1B2;MCOLN1;TRPM6;ANO3
52	Ion homeostasis_Homo sapiens_R-HSA-5578775	1951-05-01	0.0253902	0.244194	0.0337605	0.324696	-1.2458	4.57633	RYR1;RYR2;FKBP1B;ATP1B2;NOS1
53	GPCR downstream signaling_Homo sapiens_R-HSA-388396	42/983	0.0486599	0.387949	0.0601368	0.485549	-1.45381	4.39473	NPFFR2;CXCL6;ADCYAP1R1;VIPR2;SUCNR1;PTGDR2;DGKB;RGS13;ADCY4;ADCY2;CSF2RB;GRPR;ADCY6;RGS2;GRM4;EDNRB;CNR2;CXCR1;TBXA2R;HRH4;S1PR1;CCR8;CCR4;RGS7;PTGDR;GABBR2;OR8J1;F2R;PDE2A;OPRK1;OR6N1;PPBP;GNG11;RHOB;LPAR5;IL2RB;OR2AT4;RLN3;VIP;DGKK;PF4;F2RL3
54	Signaling by GPCR_Homo sapiens_R-HSA-372790	53/1293	0.0551303	0.394778	0.0672724	0.488377	-1.50328	4.35659	NPFFR2;CXCL6;VIPR2;PTGDR2;DGKB;ITGA2B;GRPR;RGS2;GRM4;EDNRB;CCR8;CCR4;RGS7;PTGDR;F2R;KSR2;RHOB;OR2AT4;DGKK;ADCYAP1R1;SUCNR1;RGS13;C5AR2;ADCY4;ADCY2;CSF2RB;RASGRP4;ADCY6;WNT11;CNR2;CXCR1;TBXA2R;HRH4;S1PR1;GABBR2;OR8J1;FZD7;PDE2A;FZD8;OPRK1;OR6N1;PPBP;GRIN2B;GNG11;FGF17;LPAR5;IL2RB;FGF18;RLN3;VIP;LAT;PF4;F2RL3
55	G alpha (q) signalling events_Homo sapiens_R-HSA-416476	11/191	0.0506693	0.387949	0.0623042	0.486433	-1.45353	4.33507	NPFFR2;RGS2;EDNRB;LPAR5;DGKB;TBXA2R;F2R;DGKK;GRPR;GNG11;F2RL3
56	Glycosaminoglycan metabolism_Homo sapiens_R-HSA-1630316	8/121	0.045855	0.387949	0.0568291	0.482679	-1.34119	4.1339	DSEL;SDC3;B3GNT3;CHST1;SDC1;HS3ST2;CHST3;SGSH
57	Gastrin-CREB signalling pathway via PKC and MAPK_Homo sapiens_R-HSA-881907	20/432	0.0779073	0.431791	0.093474	0.517173	-1.50491	3.84088	NPFFR2;DGKB;ITGA2B;F2R;CSF2RB;KSR2;GRPR;GRIN2B;GNG11;RASGRP4;FGF17;RGS2;EDNRB;LPAR5;TBXA2R;IL2RB;FGF18;DGKK;LAT;F2RL3
58	Peptide hormone metabolism_Homo sapiens_R-HSA-2980736	1981-06-01	0.0499457	0.387949	0.0615471	0.486433	-1.28061	3.83776	CPA3;ACE;SLC30A8;CMA1;KIF5C;LEP
59	Signal Transduction_Homo sapiens_R-HSA-162582	94/2465	0.0654909	0.404513	0.0756879	0.488377	-1.37231	3.7407	NPFFR2;CXCL6;RARG;VIPR2;PTGDR2;DGKB;ITGA2B;GRPR;GLI3;RGS2;GRM4;EDNRB;GRAP2;PDK4;RSPO2;CCR8;CCR4;DACT1;RGS7;PTGDR;FST;F2R;NOG;KSR2;SORCS3;ETV4;DKK1;RHOB;CYP26C1;SFRP2;ALDH1A1;OR2AT4;BTK;DGKK;RAPGEF3;CFTR;ADCYAP1R1;SUCNR1;EPAS1;RGS13;C5AR2;SDC3;ADCY4;DTX1;ADCY2;CSF2RB;PRICKLE1;LIN7B;THBS1;CXXC4;ADCY6;RASGRP4;WNT11;CNR2;CXCR1;TBXA2R;HRH4;S1PR1;RHPN2;WASF3;NTRK2;GABBR2;TCF7L1;OR8J1;CMA1;PDE6G;CAV1;FZ…
60	Platelet Aggregation (Plug Formation)_Homo sapiens_R-HSA-76009	1937-04-01	0.0321887	0.296499	0.0421375	0.38814	-1.01727	3.49548	GP9;ITGA2B;RAPGEF3;BCAR1
61	Vasopressin regulates renal water homeostasis via Aquaporins_Homo sapiens_R-HSA-432040	1943-04-01	0.0516764	0.387949	0.0640212	0.486433	-1.15411	3.41933	ADCY4;ADCY2;GNG11;ADCY6
62	Axon guidance_Homo sapiens_R-HSA-422475	23/515	0.0843537	0.438009	0.100909	0.520178	-1.30174	3.21886	SEMA5A;EPHA6;TRPC4;DCC;ITGA2B;CSF2RB;KSR2;GRIN2B;RASGRP4;CACNA1H;RHOB;RND1;EFNB2;FGF17;ABLIM3;IL2RB;KCNQ2;FGF18;PLXNB3;SCN4A;SCN2A;LAT;EPHA3
63	DAP12 signaling_Homo sapiens_R-HSA-2424491	16/344	0.102945	0.498714	0.120667	0.582417	-1.37831	3.13366	ITGA2B;ADCY4;ADCY2;CSF2RB;KSR2;GRIN2B;ADCY6;RASGRP4;FGF17;GRAP2;FGF18;IL2RB;BTK;CD28;KLRD1;LAT
64	Integration of energy metabolism_Homo sapiens_R-HSA-163685	7/110	0.0700782	0.409207	0.083712	0.488818	-1.13866	3.02672	ADCY4;CACNA2D2;ADCY2;CACNA1E;GNG11;ADCY6;RAPGEF3
65	Signaling by Retinoic Acid_Homo sapiens_R-HSA-5362517	1942-04-01	0.0480658	0.387949	0.060028	0.485549	-0.944616	2.86708	RARG;CYP26C1;ALDH1A1;PDK4
66	O-linked glycosylation of mucins_Homo sapiens_R-HSA-913709	1966-05-01	0.0652039	0.404513	0.0785048	0.488377	-1.04885	2.8636	ST6GALNAC2;B3GNT8;B3GNT3;GCNT4;GALNTL6
67	Eicosanoid ligand-binding receptors_Homo sapiens_R-HSA-391903	2018-03-15	0.0119037	0.158878	0.0189152	0.257719	-0.597756	2.6486	PTGDR2;TBXA2R;PTGDR
68	G alpha (z) signalling events_Homo sapiens_R-HSA-418597	1946-04-01	0.0633679	0.404513	0.07681	0.488377	-0.916739	2.5291	ADCY4;ADCY2;GNG11;ADCY6
69	Adenylate cyclase inhibitory pathway_Homo sapiens_R-HSA-170670	2018-03-14	0.00975752	0.139538	0.0161405	0.224593	-0.523322	2.42283	ADCY4;ADCY2;ADCY6
70	PKA-mediated phosphorylation of CREB_Homo sapiens_R-HSA-111931	2018-03-17	0.0169474	0.194449	0.025206	0.278157	-0.59338	2.41959	ADCY4;ADCY2;ADCY6
71	DAP12 interactions_Homo sapiens_R-HSA-2172127	16/359	0.134078	0.571474	0.154313	0.646763	-1.17784	2.36668	ITGA2B;ADCY4;ADCY2;CSF2RB;KSR2;GRIN2B;ADCY6;RASGRP4;FGF17;GRAP2;FGF18;IL2RB;BTK;CD28;KLRD1;LAT
72	Integrin cell surface interactions_Homo sapiens_R-HSA-216083	1967-05-01	0.0686559	0.404513	0.0822575	0.488377	-0.867676	2.3242	ITGAD;ITGB5;ITGA3;ITGA2B;THBS1
73	Prostanoid ligand receptors_Homo sapiens_R-HSA-391908	2018-03-09	0.00254468	0.050431	0.00588214	0.116573	-0.385204	2.30111	TBXA2R;PTGDR2;PTGDR
74	PKA activation in glucagon signalling_Homo sapiens_R-HSA-164378	2018-03-17	0.0169474	0.194449	0.025206	0.278157	-0.562651	2.29429	ADCY4;ADCY2;ADCY6
75	Inhibition of adenylate cyclase pathway_Homo sapiens_R-HSA-997269	2018-03-14	0.00975752	0.139538	0.0161405	0.224593	-0.491465	2.27534	ADCY4;ADCY2;ADCY6
76	PKA activation_Homo sapiens_R-HSA-163615	2018-03-16	0.0142992	0.176446	0.0219368	0.270692	-0.523074	2.22179	ADCY4;ADCY2;ADCY6
77	Alpha-defensins_Homo sapiens_R-HSA-1462054	2018-03-09	0.00254468	0.050431	0.00588214	0.116573	-0.364065	2.17483	DEFA4;DEFA3;DEFA1
78	Phospholipase C-mediated cascade: FGFR1_Homo sapiens_R-HSA-5654219	1947-04-01	0.0675481	0.404513	0.0813372	0.488377	-0.785562	2.11702	FGF17;ADCY4;ADCY2;ADCY6
79	Dopamine Neurotransmitter Release Cycle_Homo sapiens_R-HSA-212676	2018-03-23	0.0381983	0.342214	0.0499396	0.447404	-0.586055	1.91345	CPLX1;LIN7B;SLC18A2
80	Regulation of gene expression in beta cells_Homo sapiens_R-HSA-210745	2018-03-20	0.0264257	0.25047	0.0364897	0.345859	-0.495532	1.80048	HNF1A;MAFA;GCK
81	Calmodulin induced events_Homo sapiens_R-HSA-111933	2018-03-26	0.0522011	0.387949	0.0654528	0.486433	-0.605514	1.78787	ADCY4;ADCY2;ADCY6
82	CaM pathway_Homo sapiens_R-HSA-111997	2018-03-26	0.0522011	0.387949	0.0654528	0.486433	-0.58394	1.72417	ADCY4;ADCY2;ADCY6
83	HS-GAG degradation_Homo sapiens_R-HSA-2024096	2018-03-21	0.0300969	0.281191	0.0407365	0.380595	-0.483303	1.69317	SDC3;SDC1;SGSH
84	NGF signalling via TRKA from the plasma membrane_Homo sapiens_R-HSA-187037	16/374	0.170003	0.603972	0.192528	0.673113	-0.921539	1.63291	NTRK2;ADCYAP1R1;ITGA2B;ADCY4;ADCY2;CSF2RB;KSR2;GRIN2B;ADCY6;RASGRP4;FGF17;MAPK11;FGF18;IL2RB;CD28;LAT
85	Chondroitin sulfate/dermatan sulfate metabolism_Homo sapiens_R-HSA-1793185	1950-04-01	0.0809161	0.437348	0.0956849	0.517173	-0.642841	1.61632	DSEL;SDC3;SDC1;CHST3
86	Ca-dependent events_Homo sapiens_R-HSA-111996	2018-03-28	0.0627197	0.404513	0.0768734	0.488377	-0.561124	1.5538	ADCY4;ADCY2;ADCY6
87	Na+/Cl- dependent neurotransmitter transporters_Homo sapiens_R-HSA-442660	2018-03-19	0.02301	0.228008	0.032484	0.321887	-0.409731	1.54543	SLC6A9;SLC6A3;SLC18A2
88	TRP channels_Homo sapiens_R-HSA-3295583	2018-03-25	0.0472919	0.387949	0.0600605	0.485549	-0.47786	1.45815	TRPC4;MCOLN1;TRPM6
89	Adrenaline,noradrenaline inhibits insulin secretion_Homo sapiens_R-HSA-400042	2018-03-28	0.0627197	0.404513	0.0768734	0.488377	-0.524178	1.45149	CACNA2D2;GNG11;ADCY6
90	Degradation of the extracellular matrix_Homo sapiens_R-HSA-1474228	6/106	0.135441	0.571474	0.153122	0.646763	-0.701228	1.40191	MMP25;COL26A1;CMA1;COL25A1;ADAMTS1;MMP8
91	Regulation of insulin secretion_Homo sapiens_R-HSA-422356	1980-05-01	0.122271	0.551482	0.139192	0.627804	-0.654114	1.37463	CACNA2D2;CACNA1E;GNG11;RAPGEF3;ADCY6
92	Metabolism of Angiotensinogen to Angiotensins_Homo sapiens_R-HSA-2022377	2018-03-16	0.0142992	0.176446	0.0219368	0.270692	-0.323142	1.37256	CPA3;ACE;CMA1
93	Signaling by Wnt_Homo sapiens_R-HSA-195721	13/295	0.173771	0.603972	0.195511	0.673113	-0.775508	1.35715	TCF7L1;PDE6G;FZD7;CAV1;FZD8;PRICKLE1;DKK1;GNG11;CXXC4;SFRP2;WNT11;RSPO2;DACT1
94	Nitric oxide stimulates guanylate cyclase_Homo sapiens_R-HSA-392154	2018-03-25	0.0472919	0.387949	0.0600605	0.485549	-0.43052	1.3137	KCNMA1;PDE2A;NOS1
95	Integrin alphaIIb beta3 signaling_Homo sapiens_R-HSA-354192	2018-03-27	0.0573455	0.394778	0.0710591	0.488377	-0.454441	1.29909	ITGA2B;RAPGEF3;BCAR1
96	Adenylate cyclase activating pathway_Homo sapiens_R-HSA-170660	2018-03-10	0.00354712	0.0682298	0.00746625	0.135637	-0.22516	1.27027	ADCY4;ADCY2;ADCY6
97	Phase 2 - plateau phase_Homo sapiens_R-HSA-5576893	2018-03-26	0.0522011	0.387949	0.0654528	0.486433	-0.427615	1.2626	CACNG8;CACNA2D1;CACNA2D2
98	Class B/2 (Secretin family receptors)_Homo sapiens_R-HSA-373080	1984-05-01	0.141798	0.5796	0.159484	0.65189	-0.634127	1.23867	ADCYAP1R1;WNT11;FZD7;FZD8;GNG11
99	Heparan sulfate/heparin (HS-GAG) metabolism_Homo sapiens_R-HSA-1638091	1954-04-01	0.100597	0.490971	0.116516	0.568667	-0.510616	1.1727	SDC3;SDC1;HS3ST2;SGSH
100	SLC-mediated transmembrane transport_Homo sapiens_R-HSA-425407	12/268	0.172311	0.603972	0.193628	0.673113	-0.638411	1.12262	SLC30A8;SLC6A9;SLC7A8;SLC22A18;SLCO2B1;SLC26A7;SLC7A10;SLC26A3;SLC6A3;SLC18A2;GCK;SLC7A3
101	RHO GTPases Activate Rhotekin and Rhophilins_Homo sapiens_R-HSA-5666185	2018-03-09	0.00254468	0.050431	0.00588214	0.116573	-0.182426	1.08977	RHPN2;LIN7B;RHOB
102	Platelet homeostasis_Homo sapiens_R-HSA-418346	1987-05-01	0.157274	0.590424	0.175445	0.659032	-0.524309	0.96985	P2RX1;KCNMA1;PDE2A;NOS1;GNG11
103	Beta-catenin independent WNT signaling_Homo sapiens_R-HSA-3858494	7/144	0.194958	0.620135	0.214935	0.677032	-0.59072	0.965809	TCF7L1;WNT11;PDE6G;FZD7;FZD8;PRICKLE1;GNG11
104	Ca2+ pathway_Homo sapiens_R-HSA-4086398	1961-04-01	0.139687	0.57456	0.157158	0.646763	-0.487235	0.959052	TCF7L1;WNT11;PDE6G;GNG11
105	CDO in myogenesis_Homo sapiens_R-HSA-375170	2018-03-29	0.0683182	0.404513	0.0828897	0.488377	-0.348805	0.936046	MAPK11;CTNNA2;NTN3
106	Phase 1 - inactivation of fast Na+ channels_Homo sapiens_R-HSA-5576894	2018-03-27	0.0573455	0.394778	0.0710591	0.488377	-0.304334	0.869988	CACNG8;CACNA2D1;CACNA2D2
107	Signaling by PDGF_Homo sapiens_R-HSA-186797	15/364	0.217653	0.620135	0.242036	0.677032	-0.563725	0.859597	ITGA2B;ADCY4;ADCY2;CSF2RB;KSR2;GRIN2B;THBS1;ADCY6;RASGRP4;FGF17;FGF18;IL2RB;CD28;LAT;BCAR1
108	ECM proteoglycans_Homo sapiens_R-HSA-3000178	1955-04-01	0.105832	0.499939	0.12201	0.582417	-0.377155	0.847051	ITGB5;LAMA4;ITGA2B;TNR
109	Myogenesis_Homo sapiens_R-HSA-525793	2018-03-29	0.0683182	0.404513	0.0828897	0.488377	-0.308938	0.82906	MAPK11;CTNNA2;NTN3
110	Downstream signal transduction_Homo sapiens_R-HSA-186763	14/341	0.231639	0.620135	0.256062	0.677032	-0.501297	0.733185	ITGA2B;ADCY4;ADCY2;CSF2RB;KSR2;GRIN2B;ADCY6;RASGRP4;FGF17;FGF18;IL2RB;CD28;LAT;BCAR1
111	Fc epsilon receptor (FCERI) signaling_Homo sapiens_R-HSA-2454202	16/395	0.227646	0.620135	0.252828	0.677032	-0.488244	0.722585	ITK;FCER1G;ITGA2B;CSF2RB;KSR2;GRIN2B;RASGRP4;FGF17;GRAP2;IL2RB;FGF18;BTK;CD28;FCER1A;MS4A2;LAT
112	FCERI mediated Ca+2 mobilization_Homo sapiens_R-HSA-2871809	1962-04-01	0.145707	0.587464	0.163351	0.659032	-0.336686	0.648512	ITK;GRAP2;BTK;LAT
113	Collagen biosynthesis and modifying enzymes_Homo sapiens_R-HSA-1650814	1963-04-01	0.151826	0.587464	0.169631	0.659032	-0.291338	0.549178	COL26A1;COL25A1;COL22A1;COL20A1
114	Amino acid transport across the plasma membrane_Homo sapiens_R-HSA-352230	2018-03-31	0.080163	0.436888	0.0955022	0.517173	-0.193894	0.489329	SLC7A8;SLC7A10;SLC7A3
115	Amine compound SLC transporters_Homo sapiens_R-HSA-425428	2018-03-30	0.0741348	0.421155	0.0891015	0.515685	-0.171468	0.446139	SLC6A9;SLC6A3;SLC18A2
116	Thrombin signalling through proteinase activated receptors (PARs)_Homo sapiens_R-HSA-456926	1932-03-01	0.0863962	0.438009	0.102085	0.520178	-0.157278	0.385143	F2R;GNG11;F2RL3
117	HS-GAG biosynthesis_Homo sapiens_R-HSA-2022928	2018-03-31	0.080163	0.436888	0.0955022	0.517173	-0.133999	0.338173	SDC3;SDC1;HS3ST2
118	VEGFA-VEGFR2 Pathway_Homo sapiens_R-HSA-4420097	13/320	0.253708	0.656642	0.278241	0.695391	-0.220374	0.302259	CAV1;ITGA2B;CSF2RB;KSR2;GRIN2B;RASGRP4;FGF17;MAPK11;FGF18;IL2RB;LAT;BCAR1;WASF3
119	PLC-gamma1 signalling_Homo sapiens_R-HSA-167021	1934-03-01	0.09945	0.489025	0.115769	0.568667	-0.124901	0.288283	ADCY4;ADCY2;ADCY6
120	EGFR interacts with phospholipase C-gamma_Homo sapiens_R-HSA-212718	1934-03-01	0.09945	0.489025	0.115769	0.568667	-0.10433	0.240804	ADCY4;ADCY2;ADCY6
121	Post-translational protein modification_Homo sapiens_R-HSA-597592	20/521	0.266146	0.656642	0.294462	0.695391	-0.1424	0.188497	SEMA5A;GRIA1;ST6GALNAC2;THSD7B;TRAPPC5;COPZ2;AREG;THSD1;RENBP;THBS1;ADAMTSL1;NEU4;B3GNT8;ADAMTSL5;ADAMTS1;ADAMTSL2;B3GNT3;GCNT4;GALNTL6;ADAMTS7
122	Signaling by Leptin_Homo sapiens_R-HSA-2586552	10/243	0.276742	0.656642	0.299912	0.695391	-0.12336	0.158476	FGF17;LEP;ITGA2B;FGF18;IL2RB;CSF2RB;KSR2;GRIN2B;RASGRP4;LAT
123	DAG and IP3 signaling_Homo sapiens_R-HSA-1489509	1932-03-01	0.0863962	0.438009	0.102085	0.520178	-0.0605612	0.148303	ADCY4;ADCY2;ADCY6
124	Regulation of beta-cell development_Homo sapiens_R-HSA-186712	1932-03-01	0.0863962	0.438009	0.102085	0.520178	-0.0512802	0.125576	HNF1A;MAFA;GCK
125	Interaction between L1 and Ankyrins_Homo sapiens_R-HSA-445095	2018-03-29	0.0683182	0.404513	0.0828897	0.488377	-0.0466168	0.1251	KCNQ2;SCN4A;SCN2A
126	Signaling by VEGF_Homo sapiens_R-HSA-194138	13/328	0.281796	0.656642	0.306907	0.695391	-0.0952552	0.120648	CAV1;ITGA2B;CSF2RB;KSR2;GRIN2B;RASGRP4;FGF17;MAPK11;FGF18;IL2RB;LAT;BCAR1;WASF3
127	Transport of inorganic cations/anions and amino acids/oligopeptides_Homo sapiens_R-HSA-425393	1999-05-01	0.225188	0.620135	0.244557	0.677032	-0.057356	0.0855074	SLC7A8;SLC26A7;SLC7A10;SLC26A3;SLC7A3
128	Semaphorin interactions_Homo sapiens_R-HSA-373755	1967-04-01	0.177227	0.609862	0.195553	0.673113	-0.0449981	0.0778613	SEMA5A;PLXNB3;RHOB;RND1
129	ROS, RNS production in response to bacteria_Homo sapiens_R-HSA-1222556	1934-03-01	0.09945	0.489025	0.115769	0.568667	-0.0291361	0.067249	NOS1;CAMP;LTF
130	Activation of NMDA receptor upon glutamate binding and postsynaptic events_Homo sapiens_R-HSA-442755	1939-03-01	0.13517	0.571474	0.152673	0.646763	-0.0322353	0.06451	GRIA1;GRIN2B;CAMKK1
131	Gene Expression_Homo sapiens_R-HSA-74160	11/1631	1	1	1	1	3.14583	-1.37511e-09	NR5A1;MAPK11;RARG;PCBP4;PLK2;ZNF804B;ZNF703;TDRD12;TDRD9;ESR2;BBC3
132	Cell Cycle_Homo sapiens_R-HSA-1640170	2/566	1	1	1	1	3.41371	-3.4371e-07	PCBP4;HSPA2
133	Generic Transcription Pathway_Homo sapiens_R-HSA-212436	9/812	0.999986	1	0.999989	1	3.04212	-4.35277e-05	NR5A1;MAPK11;RARG;PCBP4;PLK2;ZNF703;ZNF804B;ESR2;BBC3
134	DNA Repair_Homo sapiens_R-HSA-73894	1/285	0.99993	1	0.999927	1	3.10642	-0.000215938	EYA2
135	Olfactory Signaling Pathway_Homo sapiens_R-HSA-381753	3/418	0.999909	1	0.99991	1	2.93287	-0.000267465	OR8J1;OR2AT4;OR6N1
136	Chromatin modifying enzymes_Homo sapiens_R-HSA-3247509	1/226	0.99949	1	0.999466	1	3.03271	-0.00154795	PADI4
137	Chromatin organization_Homo sapiens_R-HSA-4839726	1/226	0.99949	1	0.999466	1	3.04232	-0.00155285	PADI4
138	Fatty acid, triacylglycerol, and ketone body metabolism_Homo sapiens_R-HSA-535734	1/217	0.999309	1	0.999277	1	3.04636	-0.00210659	PPARGC1A
139	Antigen processing: Ubiquitination & Proteasome degradation_Homo sapiens_R-HSA-983168	2/260	0.998391	1	0.998358	1	3.0592	-0.00492523	TRIM63;HECW2
140	Class I MHC mediated antigen processing & presentation_Homo sapiens_R-HSA-983169	3/305	0.997653	1	0.997653	1	3.00829	-0.00706841	TRIM63;ITGB5;HECW2
141	Cell Cycle Checkpoints_Homo sapiens_R-HSA-69620	1/182	0.997752	1	0.997664	1	3.35417	-0.00754804	PCBP4
142	Vesicle-mediated transport_Homo sapiens_R-HSA-5653656	7/492	0.996997	1	0.997207	1	2.97616	-0.00894974	GRIA1;GJD3;KIF5C;GJB6;TRAPPC5;COPZ2;AREG
143	Transcriptional Regulation by TP53_Homo sapiens_R-HSA-3700989	4/348	0.996958	1	0.997013	1	3.04624	-0.00928195	MAPK11;PCBP4;PLK2;BBC3
144	Cellular Senescence_Homo sapiens_R-HSA-2559583	1/161	0.995444	1	0.995288	1	3.27625	-0.0149608	MAPK11
145	Organelle biogenesis and maintenance_Homo sapiens_R-HSA-1852241	4/326	0.994647	1	0.994742	1	2.95171	-0.0158424	MAPK11;TCTEX1D1;CNGA4;PPARGC1A
146	HIV Infection_Homo sapiens_R-HSA-162906	2/222	0.994969	1	0.994886	1	3.33161	-0.0168053	CD8B;CD28
147	Regulation of TP53 Activity_Homo sapiens_R-HSA-5633007	1/151	0.993624	1	0.993423	1	3.03279	-0.0194003	MAPK11
148	DNA Double-Strand Break Repair_Homo sapiens_R-HSA-5693532	1/145	0.992199	1	0.991967	1	3.09854	-0.0242656	EYA2
149	Infectious disease_Homo sapiens_R-HSA-5663205	5/348	0.990007	1	0.990327	1	3.1467	-0.0316033	SYT2;CD8B;SV2A;CD28;LTF
150	Membrane Trafficking_Homo sapiens_R-HSA-199991	7/420	0.985695	1	0.986508	1	2.91097	-0.041941	GRIA1;GJD3;KIF5C;GJB6;TRAPPC5;COPZ2;AREG
151	Assembly of the primary cilium_Homo sapiens_R-HSA-5617833	2/187	0.985937	1	0.985794	1	3.00427	-0.0425488	TCTEX1D1;CNGA4
152	C-type lectin receptors (CLRs)_Homo sapiens_R-HSA-5621481	1/123	0.983671	1	0.983299	1	3.12317	-0.0514187	FCER1G
153	Signaling by NOTCH_Homo sapiens_R-HSA-157118	1/122	0.983114	1	0.982734	1	3.03578	-0.0517002	DTX1
154	Signalling to RAS_Homo sapiens_R-HSA-167044	10/246	0.289218	0.656642	0.312521	0.695391	0.0421005	-0.0522289	FGF17;MAPK11;ITGA2B;FGF18;IL2RB;CSF2RB;KSR2;GRIN2B;RASGRP4;LAT
155	Activation of Matrix Metalloproteinases_Homo sapiens_R-HSA-1592389	1932-03-01	0.0863962	0.438009	0.102085	0.520178	0.0214434	-0.0525108	MMP25;CMA1;MMP8
156	Intra-Golgi and retrograde Golgi-to-ER traffic_Homo sapiens_R-HSA-6811442	2/179	0.982279	1	0.982129	1	3.02896	-0.0541589	KIF5C;COPZ2
157	Regulation of lipid metabolism by Peroxisome proliferator-activated receptor alpha (PPARalpha)_Homo sapiens_R-HSA-400206	1/116	0.979348	1	0.978927	1	3.05968	-0.0638496	PPARGC1A
158	PPARA activates gene expression_Homo sapiens_R-HSA-1989781	1/113	0.977162	1	0.97672	1	3.04916	-0.0704449	PPARGC1A
159	RHO GTPases Activate Formins_Homo sapiens_R-HSA-5663220	1/114	0.977915	1	0.97748	1	3.17021	-0.0707984	RHOB
160	FCERI mediated NF-kB activation_Homo sapiens_R-HSA-2871837	1/111	0.975577	1	0.975122	1	3.07348	-0.0759948	RASGRP4
161	Metabolism of lipids and lipoproteins_Homo sapiens_R-HSA-556833	14/659	0.971028	1	0.974482	1	2.73871	-0.0805173	ASAH1;HPGD;ABHD4;CAV1;PIK3C2G;GDPD3;CROT;PLD3;HPGDS;NEU4;LIPH;PLA2G10;SDC1;PPARGC1A
162	Programmed Cell Death_Homo sapiens_R-HSA-5357801	2/166	0.974284	1	0.974143	1	3.09177	-0.0805475	DCC;BBC3
163	Downstream signaling of activated FGFR2_Homo sapiens_R-HSA-5654696	13/329	0.285376	0.656642	0.310547	0.695391	0.0662704	-0.0830997	ITGA2B;ADCY4;ADCY2;CSF2RB;KSR2;GRIN2B;ADCY6;RASGRP4;FGF17;FGF18;IL2RB;CD28;LAT
164	Respiratory electron transport, ATP synthesis by chemiosmotic coupling, and heat production by uncoupling proteins._Homo sapiens_R-HSA-163200	1/109	0.973883	1	0.973415	1	3.26252	-0.0863399	NDUFC2
165	Apoptosis_Homo sapiens_R-HSA-109581	2/163	0.971995	1	0.971861	1	3.0889	-0.0877386	DCC;BBC3
166	Generation of second messenger molecules_Homo sapiens_R-HSA-202433	1935-03-01	0.106256	0.499939	0.122857	0.582417	0.039899	-0.0894497	ITK;GRAP2;LAT
167	Cytokine Signaling in Immune system_Homo sapiens_R-HSA-1280215	13/620	0.970521	1	0.973763	1	3.11916	-0.0933316	TNFRSF12A;ITGA2B;LIF;CSF2RB;KSR2;GRIN2B;RASGRP4;SOCS2;FGF17;IL2RB;FGF18;TNFRSF14;LAT
168	Downstream signaling of activated FGFR3_Homo sapiens_R-HSA-5654708	13/329	0.285376	0.656642	0.310547	0.695391	0.0753985	-0.0945458	ITGA2B;ADCY4;ADCY2;CSF2RB;KSR2;GRIN2B;ADCY6;RASGRP4;FGF17;FGF18;IL2RB;CD28;LAT
169	Metabolism_Homo sapiens_R-HSA-1430728	50/1908	0.964755	1	0.97762	1	2.87995	-0.103335	CDA;GADL1;PIK3C2G;CROT;FTCD;SGSH;HPGDS;CA5A;LIPH;PDK4;ENPP1;ARG2;UGT2B11;HGD;CACNA2D2;NDUFC2;GCHFR;CYP26C1;ALDH1A1;PLA2G10;ASPG;B3GNT3;CHST1;RAPGEF3;CHST3;ASAH1;HPGD;ABHD4;HDC;SDC3;AK1;ADCY4;ADCY2;GDPD3;CACNA1E;PLD3;ADCY6;NEU4;TPO;DSEL;HAO1;PPARGC1A;CAV1;EPHX1;AZIN2;GNG11;GCK;HS3ST2;TCN1;SDC1
170	MHC class II antigen presentation_Homo sapiens_R-HSA-2132295	1/103	0.968063	1	0.967562	1	3.18758	-0.103463	KIF5C
171	Downstream signaling of activated FGFR4_Homo sapiens_R-HSA-5654716	13/329	0.285376	0.656642	0.310547	0.695391	0.0853005	-0.106963	ITGA2B;ADCY4;ADCY2;CSF2RB;KSR2;GRIN2B;ADCY6;RASGRP4;FGF17;FGF18;IL2RB;CD28;LAT
172	The citric acid (TCA) cycle and respiratory electron transport_Homo sapiens_R-HSA-1428517	2/153	0.962859	1	0.962773	1	2.8798	-0.108995	PDK4;NDUFC2
173	Diseases of signal transduction_Homo sapiens_R-HSA-5663202	5/288	0.96168	1	0.962876	1	2.99503	-0.117027	FGF17;FGF18;CD28;FZD8;DKK1
174	Cellular responses to stress_Homo sapiens_R-HSA-2262752	7/367	0.958938	1	0.961027	1	2.91239	-0.122114	MAPK11;EGLN3;EPAS1;GML;WIPI1;HSPA2;HSPA12A
175	Downstream signaling events of B Cell Receptor (BCR)_Homo sapiens_R-HSA-1168372	3/192	0.953365	1	0.953868	1	3.10178	-0.148134	FGF17;FGF18;CD28
176	MAPK6/MAPK4 signaling_Homo sapiens_R-HSA-5687128	1992-01-01	0.953825	1	0.953296	1	3.21449	-0.151965	ETV4
177	Downstream signaling of activated FGFR1_Homo sapiens_R-HSA-5654687	13/332	0.296198	0.656642	0.321537	0.695391	0.129009	-0.156969	ITGA2B;ADCY4;ADCY2;CSF2RB;KSR2;GRIN2B;ADCY6;RASGRP4;FGF17;FGF18;IL2RB;CD28;LAT
178	Signaling by the B Cell Receptor (BCR)_Homo sapiens_R-HSA-983705	4/233	0.949814	1	0.950899	1	3.09881	-0.159554	FGF17;FGF18;BTK;CD28
179	Oxidative Stress Induced Senescence_Homo sapiens_R-HSA-2559580	1991-01-01	0.952252	1	0.951724	1	3.32153	-0.162508	MAPK11
[truncated: 475 more rows]

## Sheet: Mtb_5d
	Term	Overlap	P.value	Adjusted.P.value	Old.P.value	Old.Adjusted.P.value	Z.score	Combined.Score	Genes
[truncated: 942 more rows]
