# Supplementary material for: An evolutionary recent IFN/IL-6/CEBP axis is linked to monocyte expansion and tuberculosis severity in humans
Source: eLife. 2019 Oct 22;8:e47013. doi: 10.7554/eLife.47013 (PMC6819084; doi:10.7554/eLife.47013)
Supplement: Supplementary file 2. [file elife-47013-supp2.xlsx]

## Sheet: Table 2
Table 2:
Systems analysis (Ingenuity Pathway Analysis and Gene Set Enrichment Analysis) of cohorts of healthy controls, patients with latent TB, active TB, disseminated TB, overlap with IL6/STAT3 signalling and myeloid development.

## Sheet: IPA mono upstream
Ingenuity Pathway Analysis of purified monocytes, differentially expressed genes in patients with active TB vs. healthy controls (from Berry et al.
Upstream Regulator	Expr Log Ratio	Molecule Type	Predicted Activation State	Activation z-score	p-value of overlap	Target molecules in dataset		Type I IFN gene sets
IFNG		cytokine	Activated	5.493	1.25e-10	ADM,AIM2,AUTS2,BATF2,C1QB,C1QC,C2,CCND2,CCR5,CD38,CFB,CHAC1,CHST8,COL1A2,CSF2RB,CXCR4,DBP,FCGR1A,FCGR1B,FHL2,FKBP5,FPR2,GAS6,GBP1,GBP2,GBP4,GBP5,GCH1,GPR19,HLA-DRB5,HLA-F,IFI27,IFIT3,IL12RB1,IL19,IL27,IRF1,KLF10,LGALS3BP,LTB,NAMPT,OAS2,OASL,OPTN,PARP9,PCSK1,PSMB9,PSME2,PTGES,PTX3,RAB38,RARRES1,SCGB3A1,SERPINA1,SERPING1,SLC2A11,SOCS2,SOCS3,STAT1,STAT3,TAP1,TAP2,TAPBP,TMEM158,TMEM50B,TNF,TRIM22,TSH…		IL6/STAT3 gene sets
IRF3		transcription regulator	Activated	3.908	5.56e-06	DDX60,FCGR1A,GBP1,GBP5,HLA-F,IFI27,IFIT3,IL27,IRF1,OAS2,OASL,PLAC8,SAMD9L,STAT1,TAP1,TNF,UBE2L6		CD34+/HSPC/monocyte/macrophage gene sets
IFNA2		cytokine	Activated	3.421	9.38e-07	DDX60,EPB41L3,GBP1,GBP2,GBP4,IFI27,IFIT3,IRF1,LGALS3BP,OAS2,PARP9,RASSF1,SOCS2,SOCS3,STAT1,TAP1,TGM2,TNF,TRIM22,UBE2L6
Ifnar		group	Activated	3.412	1.05e-06	GBP2,IFIT3,IRF1,OAS2,OASL,PSMB9,STAT1,TAP1,TAP2,TAPBP,TNF,UBE2L6
IRF1	0.948	transcription regulator	Activated	3.251	2.23e-09	CFB,FPR2,GBP2,IFIT3,IL12RB1,IL27,IRF1,LTB,MYB,OAS2,POLH,PSMB9,PSME2,STAT1,STAT3,TAP1,TAP2,TAPBP,TNF,TRIM22
STAT1	1.89	transcription regulator	Activated	2.924	9.91e-08	BAD,BATF2,CCND2,CFB,FCGR1A,GBP1,GBP2,GBP5,HLA-DRB5,IFI27,IFIT3,IRF1,OAS2,OASL,PARP9,PSMB9,PSME2,SERPING1,SOCS3,STAT1,STAT3,TAP1,TNF,TRIM22,TYMP
IFNB1		cytokine	Activated	2.445	0.00105	AGL,CCR5,CD38,FBLN2,GBP2,GBP4,GBP5,IFI27,IFIT3,IL27,IRF1,LAMB1,OAS2,RASSF1,STAT1,TNF
DDX58		enzyme	Activated	2.372	0.0027	IFI27,IFIT3,IRF1,SOCS3,STAT1,TNF
IL6		cytokine	Activated	2.342	0.0048	ACOX1,ADAMTS13,CCR5,CD38,CSF2RB,CXCR4,FCGR1A,FPR2,GBP2,HLA-DRB5,IRF1,LPA,MAF,MYB,NAMPT,PCSK1,PSMB9,PSME2,PTGES,RASSF1,SERPINA1,SOCS2,SOCS3,STAT1,STAT3,STOM,TAP1,TGM2,TNF
IL1B		cytokine	Activated	2.048	3.62e-05	ADM,CCR5,CFB,CSF2RB,CXCR4,CYP8B1,DBP,EIF4E,FAM129A,FGF18,FGFR2,FKBP5,FPR2,GAS6,GBP1,GBP2,GCH1,IFIT3,IL19,IL27,IRF1,KLF10,NAMPT,OAS2,PCSK1,PELI3,PSMB9,PSME2,PTGES,PTX3,SERPINF2,SIRT3,SOCS2,SOCS3,STAT1,STAT3,TAP2,TGM2,TNF,TYMP,UBE2L6
JAK1		kinase		1.998	7.28e-05	HLA-F,IL19,IRF1,PSMB9,SOCS3,STAT1,TAP1,TNF
IL6ST		transmembrane receptor		1.982	0.0138	IRF1,MAF,RET,SOCS3,STAT3
IFN type 1		group		1.982	0.0284	IL27,IRF1,OASL,STAT1
CSF3		cytokine		1.789	0.121	CCND2,CXCR4,FCGR1A,LTB,SOCS3,STAT3,TNF
JAK2		kinase		1.66	0.000198	ACE,CCND2,GBP2,IL19,IRF1,PSMB9,SOCS3,STAT1,STAT3,TAP1,TNF
IL6R		transmembrane receptor		1.432	0.0101	COL1A2,IRF1,NAMPT,SOCS3,STAT3,TNF
lipoarabinomannan		chemical - endogenous non-mammalian		1.342	1.37e-05	CCR5,CXCR4,HLA-DRB5,IRF1,STAT1,TNF
IRF8		transcription regulator		1.242	0.0143	ARID5B,BANK1,CFB,GBP1,IL27,MAF,STAT1,TNF
STAT2		transcription regulator		1.047	0.000894	GBP1,IFI27,IFIT3,IRF1,OAS2,TNF
IL10		cytokine		1.033	5.83e-05	ADM,CCND2,CCR5,CSF2RB,CXCR4,FCGR1A,FKBP5,IL27,IRF1,LY75,MAF,PSMB9,PTX3,RARRES1,REG3A,SOCS3,STAT1,STAT3,TAP1,TAP2,TMEM158,TNF
STAT3	0.726	transcription regulator		0.467	2.5e-06	ADM,CCND2,CCR5,CFB,COL1A2,CXCR4,FCGR1A,GBP2,GBP5,HLA-DRB5,IFI27,IFIT3,IL12RB1,IRF1,MAF,MYB,NAMPT,NRP2,OAS2,OASL,PCSK1,PGR,PSMB9,REG3A,RET,SERPINA1,SOCS3,STAT1,STAT3,TAP1,TNF,TRIM22
CSF2		cytokine		0.099	0.000117	ACE,AURKA,BAD,CCR5,CD38,CSF2RB,CXCR4,ERCC6L,FCGR1A,FPR2,GCH1,GHRL,GK,IL19,LTB,LY75,MYB,PMP22,REG3A,SGO1,SLAMF7,SOCS2,SOCS3,TGM2,TNF
STAT5A		transcription regulator		-0.055	0.00147	ALDH3A1,ANKRD22,CCND2,CCR5,IGFL2,IRF1,KLF10,LEF1,LTB,MAF,QPRT,S1PR5,SOCS2,SOCS3,TNF,ZP3
STAT5A		transcription regulator		-0.055	0.00147	ALDH3A1,ANKRD22,CCND2,CCR5,IGFL2,IRF1,KLF10,LEF1,LTB,MAF,QPRT,S1PR5,SOCS2,SOCS3,TNF,ZP3
CEBPA		transcription regulator		-0.078	0.00749	CCND2,CNFN,COL1A2,CXCR4,EIF4E,EVPL,FCGR1A,GBP1,GCH1,HPR,IFI27,KLK14,OAS2,OTX2,PLOD2,PTX3,SOCS3,SPRR3,TNFRSF19
IRF9		transcription regulator		-0.156	1.15e-06	GBP1,IFI27,IFIT3,IRF1,OAS2,SOCS3,STAT1,TNF
IL4		cytokine		-0.416	0.00197	ACOX1,ALDH1A2,CCND2,CCR5,CD38,COL1A2,CSF2RB,CXCR4,FKBP5,FPR2,GBP2,IFIT3,IL12RB1,IL19,IRF1,LEF1,LGALS3BP,LTB,LY75,MAF,PLA2G4C,PLOD2,PMP22,PTGDR2,SCGB3A1,SLAMF7,SOCS2,SOCS3,STAT1,TAP2,TAPBP,TGM2,TNF
GATA3		transcription regulator		-0.585	0.00202	ACBD4,ADM,CCR5,CNFN,CXCR4,EVPL,KLK14,LTB,MAF,PTGDR2,RET,SPRR3,TNF
SOCS3	2.416	phosphatase		-1.249	0.0144	FCGR1A,IRF1,OAS2,SOCS3,STAT3,TNF
SOCS1		other	Inhibited	-3.092	0.000716	FKBP5,GBP5,IFIT3,IL12RB1,IRF1,OAS2,SOCS3,STAT1,STAT3,TNF
IL10RA		transmembrane receptor	Inhibited	-3.243	2.48e-09	BATF2,CFB,CLEC9A,CYP2S1,DPEP1,GAS6,GBP2,GBP5,IL12RB1,IRF1,MFSD4A,MYB,NAMPT,NDRG2,PMP22,PSMB9,REG3A,SLAMF8,SOCS3,SPON1,STAT1,STAT3,SULT1C2,TAP1,TAP2,TARM1,TGM2,TNF
KIT		transmembrane receptor			1.84e-05	CCND2,CSF2RB,CXCR4,IL12RB1,IL27,PSTPIP2,SOCS2,SOCS3,STAT1,STAT3,TNF

## Sheet: IPA mono pathways
Ingenuity Pathway Analysis of purified monocytes, differentially expressed genes in patients with active TB vs. healthy controls (from Berry et al.)
Ingenuity Canonical Pathways	-log(p-value)	Ratio	Molecules		Type I IFN gene sets
IL-9 Signaling	5.04	0.178	SOCS3,PIK3R1,FGFR4,SOCS2,FGFR2,STAT3,STAT1,TNF		IL6/STAT3 gene sets
Antigen Presentation Pathway	4.58	0.184	PSMB9,HLA-F,TAPBP,TAP1,TAP2,HLA-DPB1,HLA-DRB5		CD34+/HSPC/monocyte/macrophage gene sets
Th1 and Th2 Activation Pathway	4.45	0.0811	SOCS3,PTGDR2,CCR5,IL12RB1,CXCR4,PIK3R1,MAF,FGFR2,IL27,STAT3,IRF1,FGFR4,STAT1,HLA-DPB1,HLA-DRB5
IL-12 Signaling and Production in Macrophages	4.35	0.089	LPA,IL12RB1,APOF,PIK3R1,MAF,FGFR2,MAPK11,IRF1,FGFR4,APOC1,SERPINA1,STAT1,TNF
Th1 Pathway	4.05	0.0889	SOCS3,CCR5,IL12RB1,PIK3R1,FGFR4,IL27,FGFR2,STAT3,STAT1,HLA-DPB1,HLA-DRB5,IRF1
FXR/RXR Activation	3.69	0.0873	G6PC2,HPR,LIPC,APOF,FGFR4,APOC1,SERPINA1,PLTP,TNF,SERPINF2,CYP8B1
Dendritic Cell Maturation	3.21	0.0684	PIK3R1,NOTUM,LTB,FGFR2,FCGR1A,MAPK11,COL1A2,FGFR4,LY75,STAT1,TNF,FCGR1B,HLA-DRB5
Prolactin Signaling	3.11	0.0964	SOCS3,PIK3R1,FGFR4,SOCS2,FGFR2,STAT3,STAT1,IRF1
Atherosclerosis Signaling	3.06	0.0787	COL1A2,LPA,PLA2G2F,APOF,CXCR4,PLA2R1,PLA2G4C,APOC1,SERPINA1,TNF
Th2 Pathway	3.05	0.0733	SOCS3,PTGDR2,CCR5,IL12RB1,CXCR4,PIK3R1,FGFR4,MAF,FGFR2,HLA-DPB1,HLA-DRB5
FLT3 Signaling in Hematopoietic Progenitor Cells	3.05	0.0941	BAD,PIK3R1,FGFR4,FGFR2,STAT3,STAT1,MAPK11,EIF4E
Leptin Signaling in Obesity	3.05	0.0941	SOCS3,PIK3R1,FGFR4,NOTUM,FGFR2,STAT3,ADCY8,GHRL
CCR3 Signaling in Eosinophils	2.98	0.0769	CALML5,PPP1R12B,MPRIP,GNB3,PLA2G2F,PIK3R1,FGFR4,PLA2G4C,FGFR2,MAPK11
FGF Signaling	2.88	0.0889	FGF18,PIK3R1,FGFR4,FGF20,FGFR2,FGFRL1,STAT3,MAPK11
Chemokine Signaling	2.85	0.0986	CALML5,CCR5,PPP1R12B,MPRIP,CAMK2D,CXCR4,MAPK11
L-serine Degradation	2.78	0.667	SRR,SDSL
STAT3 Pathway	2.78	0.0959	SOCS3,FGFR4,SOCS2,FGFR2,FGFRL1,STAT3,MAPK11
GM-CSF Signaling	2.78	0.0959	CSF2RB,CAMK2D,PIK3R1,FGFR4,FGFR2,STAT3,STAT1
Complement System	2.77	0.135	SERPING1,CFB,C1QC,C1QB,C2
Renin-Angiotensin Signaling	2.66	0.075	PIK3R1,FGFR4,FGFR2,STAT3,ADCY8,STAT1,MAPK11,TNF,ACE
IL-22 Signaling	2.65	0.167	SOCS3,STAT3,STAT1,MAPK11
Acute Phase Response Signaling	2.63	0.0651	SOCS3,SERPING1,PIK3R1,CFB,SOCS2,SERPINA1,STAT3,MAPK11,TNF,SERPINF2,C2
Glycogen Degradation II	2.61	0.25	TYMP,PYGB,AGL
iCOS-iCOSL Signaling in T Helper Cells	2.61	0.0738	CALML5,CAMK2D,BAD,PIK3R1,FGFR4,LAT,TRAT1,FGFR2,HLA-DRB5
Role of JAK family kinases in IL-6-type Cytokine Signaling	2.58	0.16	SOCS3,STAT3,STAT1,MAPK11
UVA-Induced MAPK Signaling	2.54	0.0784	PIK3R1,FGFR4,NOTUM,FGFR2,PARP3,STAT1,MAPK11,PARP9
Growth Hormone Signaling	2.52	0.0864	SOCS3,PIK3R1,FGFR4,SOCS2,FGFR2,STAT3,STAT1
Antioxidant Action of Vitamin C	2.51	0.0777	SLC2A5,CSF2RB,PLA2G2F,PLA2R1,PLA2G4C,NOTUM,MAPK11,TNF
IL-3 Signaling	2.46	0.0843	CSF2RB,BAD,PIK3R1,FGFR4,FGFR2,STAT3,STAT1
JAK/Stat Signaling	2.46	0.0843	SOCS3,PIK3R1,FGFR4,SOCS2,FGFR2,STAT3,STAT1
IGF-1 Signaling	2.44	0.0755	SOCS3,BAD,PIK3R1,FGFR4,SOCS2,FGFR2,STAT3,GRB10
Glycogen Degradation III	2.41	0.214	TYMP,PYGB,AGL
Type I Diabetes Mellitus Signaling	2.34	0.0727	SOCS3,SOCS2,HLA-F,STAT1,MAPK11,TNF,HLA-DRB5,IRF1
UVB-Induced MAPK Signaling	2.33	0.0909	BAD,PIK3R1,FGFR4,FGFR2,MAPK11,EIF4E
nNOS Signaling in Skeletal Muscle Cells	2.32	0.2	SNTB2,CALML5,DMD
Eicosanoid Signaling	2.3	0.0896	PTGES,DPEP1,PLA2G2F,PLA2R1,PLA2G4C,FPR2
Crosstalk between Dendritic Cells and Natural Killer Cells	2.29	0.0787	CSF2RB,CAMK2D,LTB,KIR2DL4,HLA-F,TNF,HLA-DRB5
EGF Signaling	2.27	0.0882	PIK3R1,FGFR4,FGFR2,STAT3,STAT1,MAPK11
Regulation of the Epithelial-Mesenchymal Transition Pathway	2.26	0.0582	FGF18,PIK3R1,FGFR4,FZD6,FGF20,FGFR2,LEF1,FGFRL1,STAT3,WNT1,CLDN3
Acute Myeloid Leukemia Signaling	2.24	0.0769	CSF2RB,BAD,PIK3R1,FGFR4,FGFR2,LEF1,STAT3
Production of Nitric Oxide and Reactive Oxygen Species in Macrophages	2.2	0.057	LPA,APOF,PIK3R1,FGFR4,APOC1,FGFR2,SERPINA1,STAT1,MAPK11,TNF,IRF1
Role of JAK1 and JAK3 in γc Cytokine Signaling	2.18	0.0845	SOCS3,PIK3R1,FGFR4,FGFR2,STAT3,STAT1
LPS/IL-1 Mediated Inhibition of RXR Function	2.17	0.0541	LIPC,SULT1C2,ACOX1,ALDH1A2,ALDH8A1,APOC1,PLTP,CHST13,ALDH3A1,TNF,ABCC4,SULT1A2
Fc Epsilon RI Signaling	2.13	0.0672	PLA2G2F,PIK3R1,FGFR4,LAT,PLA2G4C,FGFR2,MAPK11,TNF
ERK/MAPK Signaling	2.1	0.0553	HSPB3,BAD,PLA2G2F,PIK3R1,FGFR4,VRK2,PLA2G4C,FGFR2,STAT3,STAT1,EIF4E
LXR/RXR Activation	2.09	0.0661	HPR,LPA,APOF,APOC1,SERPINA1,PLTP,TNF,SERPINF2
Role of JAK2 in Hormone-like Cytokine Signaling	2.09	0.118	SOCS3,SOCS2,STAT3,STAT1
Antiproliferative Role of Somatostatin Receptor 2	2.07	0.08	GNB3,GUCY2C,PIK3R1,FGFR4,NPR1,FGFR2
Dopamine Degradation	2.04	0.114	SULT1C2,ALDH1A2,ALDH3A1,SULT1A2
Thrombin Signaling	2.04	0.0542	ARHGEF4,PPP1R12B,MPRIP,CAMK2D,GNB3,PIK3R1,FGFR4,NOTUM,FGFR2,ADCY8,MAPK11
IL-15 Signaling	2.04	0.0789	PIK3R1,FGFR4,FGFR2,STAT3,MAPK11,TNF
Histamine Degradation	2.02	0.158	HNMT,ALDH1A2,ALDH3A1
IL-17A Signaling in Airway Cells	2.01	0.0779	IL19,PIK3R1,FGFR4,FGFR2,STAT3,MAPK11
Sperm Motility	2.01	0.064	CALML5,PLA2G2F,ZP3,NPR1,PLA2R1,PLA2G4C,NOTUM,PDE4D
Interferon Signaling	2	0.111	IFIT3,STAT1,TAP1,IRF1
IL-6 Signaling	1.97	0.063	HSPB3,SOCS3,PIK3R1,FGFR4,FGFR2,STAT3,MAPK11,TNF
Cellular Effects of Sildenafil (Viagra)	1.91	0.0615	CACNG2,CALML5,PPP1R12B,MPRIP,GUCY2C,NOTUM,PDE4D,ADCY8
CREB Signaling in Neurons	1.91	0.0543	CALML5,CAMK2D,GNB3,PIK3R1,FGFR4,GRID2,NOTUM,FGFR2,GRIK2,ADCY8
MSP-RON Signaling Pathway	1.9	0.0847	CSF2RB,PIK3R1,FGFR4,FGFR2,TNF
Mouse Embryonic Stem Cell Pluripotency	1.89	0.066	PIK3R1,FGFR4,FZD6,FGFR2,LEF1,STAT3,MAPK11
Endothelin-1 Signaling	1.86	0.0535	PLA2G2F,GUCY2C,PIK3R1,FGFR4,PLA2R1,PLA2G4C,NOTUM,FGFR2,ADCY8,MAPK11
Role of PKR in Interferon Induction and Antiviral Response	1.84	0.1	STAT1,TNF,FCGR1A,IRF1
Adipogenesis pathway	1.84	0.0597	ZNF423,FGFR4,SIN3B,FZD6,FGFR2,FGFRL1,PER2,TNF
Colorectal Cancer Metastasis Signaling	1.83	0.0486	GNB3,BAD,PIK3R1,FGFR4,FZD6,FGFR2,LEF1,STAT3,ADCY8,STAT1,TNF,WNT1
Phospholipases	1.81	0.0806	LIPC,PLA2G2F,PLA2R1,PLA2G4C,NOTUM
Role of Macrophages, Fibroblasts and Endothelial Cells in Rheumatoid Arthritis	1.8	0.0453	SOCS3,CALML5,PIK3R1,NOTUM,LTB,FGFR2,STAT3,FCGR1A,CAMK2D,FGFR4,FZD6,LEF1,TNF,WNT1
Role of Pattern Recognition Receptors in Recognition of Bacteria and Viruses	1.79	0.0584	PTX3,OAS2,PIK3R1,FGFR4,FGFR2,C1QC,C1QB,TNF
CNTF Signaling	1.78	0.0794	PIK3R1,FGFR4,FGFR2,STAT3,STAT1
Endometrial Cancer Signaling	1.76	0.0781	BAD,PIK3R1,FGFR4,FGFR2,LEF1
VEGF Family Ligand-Receptor Interactions	1.75	0.0682	PLA2G2F,NRP2,PIK3R1,FGFR4,PLA2G4C,FGFR2
Aryl Hydrocarbon Receptor Signaling	1.74	0.0571	TGM2,HSPB3,CCND2,NFIC,ALDH1A2,ALDH8A1,ALDH3A1,TNF
Thrombopoietin Signaling	1.73	0.0769	PIK3R1,FGFR4,FGFR2,STAT3,STAT1
Insulin Receptor Signaling	1.72	0.0567	SOCS3,ASIC2,BAD,PIK3R1,FGFR4,FGFR2,EIF4E,GRB10
Clathrin-mediated Endocytosis Signaling	1.72	0.0508	LPA,FGF18,APOF,PIK3R1,FGFR4,AMPH,APOC1,FGF20,FGFR2,SERPINA1
Xenobiotic Metabolism Signaling	1.71	0.0453	CAMK2D,SULT1C2,FGFR4,PIK3R1,ALDH1A2,MAF,ALDH8A1,FGFR2,CHST13,ALDH3A1,MAPK11,TNF,SULT1A2
iNOS Signaling	1.7	0.0909	CALML5,STAT1,MAPK11,IRF1
Human Embryonic Stem Cell Pluripotency	1.69	0.0559	S1PR5,PIK3R1,FGFR4,FZD6,FGFR2,LEF1,FGFRL1,WNT1
Glycine Betaine Degradation	1.66	0.2	SRR,SDSL
IL-10 Signaling	1.65	0.0735	SOCS3,CCR5,STAT3,MAPK11,TNF
Ceramide Signaling	1.64	0.0645	S1PR5,BAD,PIK3R1,FGFR4,FGFR2,TNF
ErbB2-ErbB3 Signaling	1.63	0.0725	BAD,PIK3R1,FGFR4,FGFR2,STAT3
Alanine Biosynthesis III	1.63	1	NFS1
Natural Killer Cell Signaling	1.59	0.0574	KIR2DS4 (includes others),PIK3R1,FGFR4,LAT,FGFR2,KIR2DL4,SH2D1B
Phagosome Formation	1.59	0.0574	PIK3R1,FGFR4,PLA2R1,NOTUM,FGFR2,FCGR1A,FCGR1B
Role of MAPK Signaling in the Pathogenesis of Influenza	1.56	0.0694	PLA2G2F,PLA2R1,PLA2G4C,MAPK11,TNF
Relaxin Signaling	1.55	0.0526	GNB3,GUCY2C,PIK3R1,FGFR4,NPR1,FGFR2,PDE4D,ADCY8
T Helper Cell Differentiation	1.53	0.0685	IL12RB1,STAT3,STAT1,TNF,HLA-DRB5
Role of NFAT in Regulation of the Immune Response	1.49	0.0486	CALML5,GNB3,PIK3R1,FGFR4,LAT,FGFR2,FCGR1A,HLA-DRB5,FCGR1B
Role of PI3K/AKT Signaling in the Pathogenesis of Influenza	1.47	0.0658	CCR5,PIK3R1,FGFR4,FGFR2,PLAC8
Docosahexaenoic Acid (DHA) Signaling	1.47	0.0769	BAD,PIK3R1,FGFR4,FGFR2
Angiopoietin Signaling	1.45	0.0649	BAD,PIK3R1,FGFR4,FGFR2,TEK
Non-Small Cell Lung Cancer Signaling	1.45	0.0649	BAD,PIK3R1,FGFR4,FGFR2,RASSF1
CD40 Signaling	1.43	0.0641	PIK3R1,FGFR4,FGFR2,STAT3,MAPK11
Role of NFAT in Cardiac Hypertrophy	1.41	0.0469	CALML5,CAMK2D,GNB3,PIK3R1,FGFR4,NOTUM,FGFR2,ADCY8,MAPK11
Melanoma Signaling	1.39	0.0727	BAD,PIK3R1,FGFR4,FGFR2
Leukotriene Biosynthesis	1.38	0.143	DPEP1,GGTLC2
Aldosterone Signaling in Epithelial Cells	1.36	0.0482	HSPB3,ODF1,ASIC2,DNAJB4,PIK3R1,FGFR4,NOTUM,FGFR2
T Cell Receptor Signaling	1.35	0.055	CALML5,PIK3R1,FGFR4,LAT,FGFR2,BMX
Glutamate Receptor Signaling	1.34	0.0702	CALML5,GNB3,GRID2,GRIK2
Glycine Biosynthesis III	1.33	0.5	AGXT
Amyotrophic Lateral Sclerosis Signaling	1.32	0.0541	CAPN8,PIK3R1,FGFR4,GRID2,FGFR2,GRIK2
Tec Kinase Signaling	1.31	0.0471	GNB3,PIK3R1,FGFR4,FGFR2,BMX,STAT3,STAT1,TNF
IL-17 Signaling	1.29	0.0588	IL19,PIK3R1,FGFR4,FGFR2,MAPK11
γ-glutamyl Cycle	1.27	0.125	GGTLC2,CHAC1
HIF1α Signaling	1.26	0.0522	SLC2A5,PIK3R1,FGFR4,FGFR2,MAPK11,LDHC
Synaptic Long Term Depression	1.23	0.0479	PLA2G2F,GUCY2C,GRID2,NPR1,PLA2R1,PLA2G4C,NOTUM
p38 MAPK Signaling	1.23	0.0513	HSPB3,PLA2G2F,PLA2G4C,STAT1,MAPK11,TNF
Phospholipase C Signaling	1.22	0.0417	TGM2,ARHGEF4,CALML5,PPP1R12B,MPRIP,GNB3,PLA2G2F,LAT,PLA2G4C,ADCY8
Huntington's Disease Signaling	1.21	0.0415	TGM2,CAPN8,GNB3,YKT6,CPLX2,REST,PIK3R1,FGFR4,PSME2,FGFR2
Pancreatic Adenocarcinoma Signaling	1.21	0.0508	BAD,PIK3R1,FGFR4,FGFR2,STAT3,STAT1
Molecular Mechanisms of Cancer	1.21	0.0374	ARHGEF4,HHAT,CAMK2D,CCND2,BAD,FGFR4,PIK3R1,FZD6,FGFR2,LEF1,AURKA,ADCY8,MAPK11,WNT1
PDGF Signaling	1.21	0.0556	PIK3R1,FGFR4,FGFR2,STAT3,STAT1
fMLP Signaling in Neutrophils	1.17	0.0496	CALML5,GNB3,PIK3R1,FGFR4,FPR2,FGFR2
Neuroprotective Role of THOP1 in Alzheimer's Disease	1.17	0.075	PDYN,HLA-F,ACE
Tetrahydrobiopterin Biosynthesis I	1.16	0.333	GCH1
Biotin-carboxyl Carrier Protein Assembly	1.16	0.333	HLCS
Tetrahydrobiopterin Biosynthesis II	1.16	0.333	GCH1
Role of NANOG in Mammalian Embryonic Stem Cell Pluripotency	1.16	0.0492	PIK3R1,FGFR4,FZD6,FGFR2,STAT3,WNT1
Sphingosine-1-phosphate Signaling	1.14	0.0488	S1PR5,PIK3R1,FGFR4,NOTUM,FGFR2,ADCY8
Prostate Cancer Signaling	1.14	0.0532	BAD,PIK3R1,FGFR4,FGFR2,LEF1
Lymphotoxin β Receptor Signaling	1.13	0.0597	PIK3R1,FGFR4,LTB,FGFR2
Role of IL-17A in Arthritis	1.13	0.0597	PIK3R1,FGFR4,FGFR2,MAPK11
CCR5 Signaling in Macrophages	1.09	0.058	CALML5,CCR5,GNB3,MAPK11
Role of p14/p19ARF in Tumor Suppression	1.09	0.0698	PIK3R1,FGFR4,FGFR2
Type II Diabetes Mellitus Signaling	1.09	0.0472	SOCS3,PIK3R1,FGFR4,SOCS2,FGFR2,TNF
Protein Kinase A Signaling	1.08	0.0357	CALML5,HHAT,CAMK2D,DUSP3,GNB3,PTPRJ,BAD,NOTUM,PTPRZ1,PDE4D,PYGB,LEF1,ADCY8,AKAP7
Glioblastoma Multiforme Signaling	1.08	0.044	PIK3R1,FGFR4,NOTUM,FZD6,FGFR2,LEF1,WNT1
Myc Mediated Apoptosis Signaling	1.08	0.0571	BAD,PIK3R1,FGFR4,FGFR2
CTLA4 Signaling in Cytotoxic T Lymphocytes	1.07	0.0505	PIK3R1,FGFR4,LAT,TRAT1,FGFR2
Oxidative Ethanol Degradation III	1.06	0.0952	ALDH1A2,ALDH3A1
14-3-3-mediated Signaling	1.05	0.0462	BAD,PIK3R1,FGFR4,NOTUM,FGFR2,TNF
CD28 Signaling in T Helper Cells	1.04	0.0458	CALML5,PIK3R1,FGFR4,LAT,FGFR2,HLA-DRB5
Airway Inflammation in Asthma	1.04	0.25	TNF
Molybdenum Cofactor Biosynthesis	1.04	0.25	NFS1
RANK Signaling in Osteoclasts	1.04	0.0495	CALML5,PIK3R1,FGFR4,FGFR2,MAPK11
PKCθ Signaling in T Lymphocytes	1.03	0.0455	CAMK2D,PIK3R1,FGFR4,LAT,FGFR2,HLA-DRB5
P2Y Purigenic Receptor Signaling Pathway	1.03	0.0455	GNB3,PIK3R1,FGFR4,NOTUM,FGFR2,ADCY8
Fatty Acid α-oxidation	1.03	0.0909	ALDH1A2,ALDH3A1
Serotonin Degradation	1.01	0.0541	SULT1C2,ALDH1A2,ALDH3A1,SULT1A2
Autoimmune Thyroid Disease Signaling	1	0.0638	TSHR,HLA-F,HLA-DRB5
Dermatan Sulfate Biosynthesis (Late Stages)	1	0.0638	SULT1C2,CHST13,SULT1A2

## Sheet: GSEA Berry TB
GSEA (curated gene sets) of Berry et al. whole blood TB disease signature
Overlap Results		Type I IFN gene sets
Collection(s):	C2	IL6/STAT3 gene sets
# overlaps shown:	100	CD34+/HSPC/monocyte/macrophage gene sets
# genesets in collections:	4738
# genes in comparison (n):	352
# genes in universe (N):	45956
Gene Set Name	# Genes in Gene Set (K)	Description	# Genes in Overlap (k)	k/K	p-value	FDR q-value
HECKER_IFNB1_TARGETS	95	Genes transcriptionally modulated in the blood of multiple sclerosis patients in response to subcutaneous treatment with recombinant IFNB1 [GeneID = 3456].	47	0.4947	3.49e-74	1.65e-70
FULCHER_INFLAMMATORY_RESPONSE_LECTIN_VS_LPS_DN	463	Genes down-regulated in monocyte-derived dendritic cells (MDDC) after stimulation with galecin-1 (lectin, LGALS1) [GeneID=3956] compared to that with bacterial lipopolysaccharide (LPS).	58	0.1253	4.33e-52	1.03e-48
BROWNE_INTERFERON_RESPONSIVE_GENES	68	Genes up-regulated in primary fibroblast culture after treatment with interferon alpha for 6 h.	32	0.4706	9.24e-50	1.46e-46
SANA_RESPONSE_TO_IFNG_UP	78	Genes up-regulated in five primary endothelial cell types (lung, aortic, iliac, dermal, and colon) by IFNG [GeneID=3458].	31	0.3974	2.58e-45	3.05e-42
BOSCO_INTERFERON_INDUCED_ANTIVIRAL_MODULE	78	Genes representing interferon-induced antiviral module in sputum during asthma exacerbations.	30	0.3846	2.36e-43	2.23e-40
TAKEDA_TARGETS_OF_NUP98_HOXA9_FUSION_3D_UP	182	Genes up-regulated in CD34+ [GeneID=947] hematopoetic cells by expression of NUP98-HOXA9 fusion [GeneID=4928;3205] off a retroviral vector at 3 days after transduction.	38	0.2088	4.42e-43	3.49e-40
JISON_SICKLE_CELL_DISEASE_UP	181	Genes up-regulated in peripheral blood mononuclear cells (PBMC) from sickle cell disease patients compared to those from healthy subjects.	37	0.2044	1.34e-41	9.09e-39
BENNETT_SYSTEMIC_LUPUS_ERYTHEMATOSUS	31	Genes significantly up-regulated in the blood mononuclear cells from patients with systemic lupus erythematosus compared to those from healthy persons.	22	0.7097	2.76e-40	1.45e-37
MOSERLE_IFNA_RESPONSE	31	Top 50 genes up-regulated in ovarian cancer progenitor cells (also known as side population, SP, cells) in response to interferon alpha (IFNA).	22	0.7097	2.76e-40	1.45e-37
NUYTTEN_EZH2_TARGETS_UP	1037	Genes up-regulated in PC3 cells (prostate cancer) after knockdown of EZH2 [GeneID=2146] by RNAi.	64	0.0617	2.27e-38	1.07e-35
TAKEDA_TARGETS_OF_NUP98_HOXA9_FUSION_10D_UP	194	Genes up-regulated in CD34+ [GeneID=947] hematopoetic cells by expression of NUP98-HOXA9 fusion [GeneID=4928;3205] off a retroviral vector at 10 days after transduction.	35	0.1804	2.33e-37	1e-34
TAKEDA_TARGETS_OF_NUP98_HOXA9_FUSION_8D_UP	157	Genes up-regulated in CD34+ [GeneID=947] hematopoetic cells by expression of NUP98-HOXA9 fusion [GeneID=4928;3205] off a retroviral vector at 8 days after transduction.	30	0.1911	5.87e-33	2.32e-30
REACTOME_IMMUNE_SYSTEM	933	Genes involved in Immune System	56	0.06	6.45e-33	2.35e-30
REACTOME_INTERFERON_SIGNALING	159	Genes involved in Interferon Signaling	30	0.1887	8.81e-33	2.98e-30
NUYTTEN_NIPP1_TARGETS_UP	769	Genes up-regulated in PC3 cells (prostate cancer) after knockdown of NIPP1 [GeneID=5511] by RNAi.	51	0.0663	4.81e-32	1.52e-29
WALLACE_PROSTATE_CANCER_RACE_UP	299	Genes up-regulated in prostate cancer samples from African-American patients compared to those from the European-American patients.	36	0.1204	7.3e-32	2.16e-29
ALTEMEIER_RESPONSE_TO_LPS_WITH_MECHANICAL_VENTILATION	128	Genes up-regulated in lung tissue upon LPS aspiration with mechanical ventilation (MV) compared to control (PBS aspiration without MV).	27	0.2109	5.09e-31	1.42e-28
RADAEVA_RESPONSE_TO_IFNA1_UP	52	Genes up-regulated in primary hepatocytes and Hep3B (hepatocyte) cells in response to IFNA [GeneID=3439].	20	0.3846	2.83e-29	7.44e-27
TAKEDA_TARGETS_OF_NUP98_HOXA9_FUSION_16D_UP	175	Genes up-regulated in CD34+ [GeneID=947] hematopoetic cells by expression of NUP98-HOXA9 fusion [GeneID=4928;3205] off a retroviral vector at 16 days after transduction.	28	0.16	1.5e-28	3.73e-26
REACTOME_INTERFERON_ALPHA_BETA_SIGNALING	64	Genes involved in Interferon alpha/beta signaling	20	0.3125	4.05e-27	9.6e-25
DAUER_STAT3_TARGETS_DN	50	Top 50 genes down-regulated in A549 cells (lung cancer) expressing STAT3 [GeneID=6774] off an adenovirus vector.	18	0.36	7.68e-26	1.73e-23
REACTOME_CYTOKINE_SIGNALING_IN_IMMUNE_SYSTEM	270	Genes involved in Cytokine Signaling in Immune system	30	0.1111	1.14e-25	2.46e-23
REACTOME_INTERFERON_GAMMA_SIGNALING	63	Genes involved in Interferon gamma signaling	19	0.3016	1.75e-25	3.6e-23
MARKEY_RB1_ACUTE_LOF_DN	226	Genes down-regulated in adult fibroblasts with inactivated RB1 [GeneID=5925] by Cre-lox: acute loss of function (LOF) of RB1.	28	0.1239	2.33e-25	4.59e-23
DEBIASI_APOPTOSIS_BY_REOVIRUS_INFECTION_UP	314	Genes up-regulated in HEK293 cells (embryonic kidney) at 6 h, 12 h or 24 h after infection with reovirus strain T3A (known as a strong inducer of apoptosis).	31	0.0987	6.48e-25	1.23e-22
ONDER_CDH1_TARGETS_2_DN	464	Genes down-regulated in HMLE cells (immortalized nontransformed mammary epithelium) after E-cadhedrin (CDH1) [GeneID=999] knockdown by RNAi.	35	0.0754	4.75e-24	8.66e-22
ICHIBA_GRAFT_VERSUS_HOST_DISEASE_D7_UP	107	Hepatic graft versus host disease (GVHD), day 7: up-regulated in allogeneic vs syngeneic bone marrow transplant.	21	0.1963	1.11e-23	1.94e-21
NABA_MATRISOME	1028	Ensemble of genes encoding extracellular matrix and extracellular matrix-associated proteins	48	0.0467	1.57e-23	2.66e-21
FEVR_CTNNB1_TARGETS_UP	682	Genes up-regulated in intestinal crypt cells upon deletion of CTNNB1 [GeneID=1499].	40	0.0587	2.78e-23	4.53e-21
RUTELLA_RESPONSE_TO_HGF_VS_CSF2RB_AND_IL4_UP	408	Genes up-regulated in peripheral blood mononucleocytes by HGF [GeneID=3082] compared to those regulated by CSF2RB (GM-CSF) and IL4 [GeneID=1437;3565].	32	0.0784	1.37e-22	2.16e-20
ZHANG_INTERFERON_RESPONSE	23	Interferon-inducible genes up-regulated in A549 cells (lung cancer) infected with a respiratory syncytial virus (RSV) that had its NS1 [GeneID=1494468] gene knocked down by RNAi.	13	0.5652	2.67e-22	4.08e-20
BOWIE_RESPONSE_TO_TAMOXIFEN	18	Genes up-regulated by tamoxifen [PubChem=5376] in HMEC-E6 cells (mammary epithelial cells damaged by expression of HPV-16 E6 [GeneID=1489078]).	12	0.6667	6.02e-22	8.91e-20
GRAESSMANN_RESPONSE_TO_MC_AND_SERUM_DEPRIVATION_UP	211	Genes up-regulated in ME-A cells (breast cancer, sensitive to apoptotic stimuli) upon serum deprivation for 22 hr in the presence of medium concentrate (MC) from ME-C cells (breast cancer, resistant to apoptotic stimuli).	24	0.1137	5.19e-21	7.46e-19
YANG_BCL3_TARGETS_UP	364	Genes up-regulated in neonatal cardiac myocytes upon knockdown of BCL3 [GeneID=602] by RNAi.	29	0.0797	9.2e-21	1.28e-18
DER_IFN_ALPHA_RESPONSE_UP	74	Genes up-regulated in HT1080 cells (fibrosarcoma) by treatment with interferon alpha for 6 h.	17	0.2297	1.13e-20	1.53e-18
KRASNOSELSKAYA_ILF3_TARGETS_UP	38	Up-regulated in GHOST(3)CXCR4 cells (osteosarcoma) upon ectopic expression of ILF3 [GeneID=3609].	14	0.3684	1.51e-20	1.99e-18
UROSEVIC_RESPONSE_TO_IMIQUIMOD	23	Interferon cluster genes up-regulated in skin tumors treated with imiquimod [PubChem=57469].	12	0.5217	4.24e-20	5.42e-18
BOWIE_RESPONSE_TO_EXTRACELLULAR_MATRIX	17	Genes up-regulated by growing HMEC-E6 cells (mammary epithelial cells damaged by expression of HPV-16 E6 [GeneID=1489078]) in extracellular matrix (ECM).	11	0.6471	5.41e-20	6.74e-18
DELYS_THYROID_CANCER_UP	443	Genes up-regulated in papillary thyroid carcinoma (PTC) compared to normal tissue.	30	0.0677	1.93e-19	2.34e-17
ICHIBA_GRAFT_VERSUS_HOST_DISEASE_35D_UP	131	Hepatic graft versus host disease (GVHD), day 35: genes up-regulated in allogeneic vs syngeneic bone marrow transplant.	19	0.145	6.28e-19	7.44e-17
CHEN_METABOLIC_SYNDROM_NETWORK	1210	Genes forming the macrophage-enriched metabolic network (MEMN) claimed to have a causal relationship with the metabolic syndrom traits.	45	0.0372	2.85e-18	3.29e-16
NABA_MATRISOME_ASSOCIATED	753	Ensemble of genes encoding ECM-associated proteins including ECM-affilaited proteins, ECM regulators and secreted factors	36	0.0478	3.58e-18	4.03e-16
DER_IFN_BETA_RESPONSE_UP	102	Genes up-regulated in HT1080 (fibrosarcoma) cells by treatment with interferon beta for 6 h.	17	0.1667	3.88e-18	4.28e-16
MARTINELLI_IMMATURE_NEUTROPHIL_UP	11	Neutrophil-specific genes up-regulated in comparison of immature with mature neutrophils.	9	0.8182	4.45e-18	4.79e-16
SCHUETZ_BREAST_CANCER_DUCTAL_INVASIVE_UP	351	Genes up-regulated in invasive ductal carcinoma (IDC) relative to ductal carcinoma in situ (DCIS, non-invasive).	26	0.0741	5.91e-18	6.22e-16
JAATINEN_HEMATOPOIETIC_STEM_CELL_DN	226	Genes down-regulated in CD133+ [GeneID=8842] cells (hematopoietic stem cells, HSC) compared to the CD133- cells.	22	0.0973	6.81e-18	7.01e-16
GRAESSMANN_APOPTOSIS_BY_SERUM_DEPRIVATION_UP	552	Genes up-regulated in ME-A cells (breast cancer) undergoing apoptosis upon serum starvation (5% to 0% FCS) for 22 hr.	31	0.0562	9.84e-18	9.92e-16
SEITZ_NEOPLASTIC_TRANSFORMATION_BY_8P_DELETION_UP	73	Genes up-regulated in CT60/4 cells (breast cancer reverted to normal by transfer of chromosome 8p region) vs parental MDA-MB-231 cells (deleted chromosome 8p).	15	0.2055	1.32e-17	1.31e-15
BERTUCCI_MEDULLARY_VS_DUCTAL_BREAST_CANCER_UP	206	Genes up-regulated in medullary breast cancer (MBC) relative to ductal breast cancer (DBD).	21	0.1019	1.5e-17	1.45e-15
GAL_LEUKEMIC_STEM_CELL_DN	244	Genes down-regulated in leukemic stem cells (LSC), defined as CD34+CD38- [GeneID=947;952] cells from AML (acute myeloid leukemia patients) compared to the CD34+CD38+ cells.	22	0.0902	3.52e-17	3.33e-15
RUTELLA_RESPONSE_TO_HGF_UP	418	Genes up-regulated in peripheral blood monocytes by HGF [GeneID=3082].	27	0.0646	4.26e-17	3.96e-15
EINAV_INTERFERON_SIGNATURE_IN_CANCER	27	A gene expression signature found in a subset of cancer patients suggestive of a deregulated immune or inflammatory response.	11	0.4074	5.32e-17	4.85e-15
BOYLAN_MULTIPLE_MYELOMA_PCA1_UP	101	Top up-regulated genes from principal component 1 (PCA1) which captures variation between normal plasma cells and tumors arising from aberrant expression of BCL2L1 and MYC [GeneID=598;4609].	16	0.1584	8.85e-17	7.91e-15
SMID_BREAST_CANCER_BASAL_UP	648	Genes up-regulated in basal subtype of breast cancer samles.	32	0.0494	1.14e-16	1e-14
TAKEDA_TARGETS_OF_NUP98_HOXA9_FUSION_8D_DN	205	Genes down-regulated in CD34+ [GeneID=947] hematopoetic cells by expression of NUP98-HOXA9 fusion [GeneID=4928;3205] off a retroviral vector at 8 days after transduction.	20	0.0976	2.11e-16	1.82e-14
VERHAAK_AML_WITH_NPM1_MUTATED_UP	183	Genes up-regulated in acute myeloid leukemia (AML) patients with mutated NPM1 [GeneID=4869].	19	0.1038	3.76e-16	3.18e-14
HELLER_SILENCED_BY_METHYLATION_UP	282	Genes up-regulated in at least one of three multiple myeloma (MM) cell lines treated with the DNA hypomethylating agent decitabine (5-aza-2'-deoxycytidine) [PubChem=451668].	22	0.078	7.48e-16	6.22e-14
ZWANG_TRANSIENTLY_UP_BY_2ND_EGF_PULSE_ONLY	1725	Genes transiently induced only by the second pulse of EGF [GeneID =1950] in 184A1 cells (mammary epithelium).	50	0.029	7.9e-16	6.46e-14
ZHOU_INFLAMMATORY_RESPONSE_LPS_UP	431	Genes up-regulated in macrophages by P.gingivalis LPS (lipopolysaccharide).	26	0.0603	8.49e-16	6.82e-14
BOYLAN_MULTIPLE_MYELOMA_C_D_DN	252	Genes down-regulated both in group C and D of tumors arising from overexpression of BCL2L1 and MYC [GeneID=598;4609] in plasma cells.	21	0.0833	9.16e-16	7.23e-14
CAIRO_LIVER_DEVELOPMENT_DN	222	Genes down-regulated at early fetal liver stage (embryonic days E11.5 - E12.5) compared to the late fetal liver stage (embryonic days E14.5 - E16.5).	20	0.0901	9.97e-16	7.74e-14
ZHANG_RESPONSE_TO_IKK_INHIBITOR_AND_TNF_UP	223	Genes up-regulated in BxPC3 cells (pancreatic cancer) after treatment with TNF [GeneID=7124] or IKI-1, an inhibitor of IkappaB kinase (IKK).	20	0.0897	1.09e-15	8.31e-14
SMID_BREAST_CANCER_LUMINAL_B_DN	564	Genes down-regulated in the luminal B subtype of breast cancer.	29	0.0514	1.16e-15	8.69e-14
TAKEDA_TARGETS_OF_NUP98_HOXA9_FUSION_10D_DN	142	Genes down-regulated in CD34+ [GeneID=947] hematopoetic cells by expression of NUP98-HOXA9 fusion [GeneID=4928;3205] off a retroviral vector at 10 days after transduction.	17	0.1197	1.24e-15	9.15e-14
TAKEDA_TARGETS_OF_NUP98_HOXA9_FUSION_16D_DN	143	Genes down-regulated in CD34+ [GeneID=947] hematopoetic cells by expression of NUP98-HOXA9 fusion [GeneID=4928;3205] off a retroviral vector at 16 days after transduction.	17	0.1189	1.39e-15	1.02e-13
GRAESSMANN_APOPTOSIS_BY_DOXORUBICIN_UP	1142	Genes up-regulated in ME-A cells (breast cancer) undergoing apoptosis in response to doxorubicin [PubChem=31703].	40	0.035	1.81e-15	1.3e-13
WIELAND_UP_BY_HBV_INFECTION	101	Genes induced in the liver during hepatitis B (HBV) viral clearance in chimpanzees.	15	0.1485	2.23e-15	1.58e-13
LIANG_SILENCED_BY_METHYLATION_2	53	Genes up-regulated in T24 cells (bladder carcinoma) after treatment with decitabine (5-aza-2'-deoxycytidine) [PubChem=451668].	12	0.2264	6.81e-15	4.74e-13
RUTELLA_RESPONSE_TO_CSF2RB_AND_IL4_DN	315	Genes down-regulated in peripheral blood monocytes by CSF2RB (GM-CSF) and IL4 [GeneID=1437;3565].	22	0.0698	7.44e-15	5.11e-13
MARTENS_TRETINOIN_RESPONSE_UP	857	Genes up-regulated in NB4 cells (acute promyelocytic leukemia, APL) in response to tretinoin [PubChem=444795]; based on Chip-seq data.	34	0.0397	7.74e-15	5.24e-13
COLINA_TARGETS_OF_4EBP1_AND_4EBP2	356	Genes up-regulated in MEF cells (embryonic fibroblast) with double knockout of the translation repressors 4EBP1 [GeneID=1978] and 4EBP2 [GeneID=1979].	23	0.0646	9.51e-15	6.34e-13
DER_IFN_GAMMA_RESPONSE_UP	71	Genes up-regulated in HT1080 (fibrosarcoma) cells by treatment with interferon gamma for 6 h.	13	0.1831	9.75e-15	6.42e-13
TARTE_PLASMA_CELL_VS_PLASMABLAST_UP	398	Genes up-regulated in mature plasma cells compared with plasmablastic B lymphocytes.	24	0.0603	1.13e-14	7.3e-13
RIGGINS_TAMOXIFEN_RESISTANCE_DN	220	Genes down-regulated SUM44/LCCTam cells (breast cancer) resistant to 4-hydroxytamoxifen [PubChem=63062] relative to the parental SUM44 cells sensitive to the drug.	19	0.0864	1.14e-14	7.3e-13
MCLACHLAN_DENTAL_CARIES_UP	254	Genes up-regulated in pulpal tissue extracted from carious teeth.	20	0.0787	1.32e-14	8.36e-13
BOSCO_TH1_CYTOTOXIC_MODULE	114	Genes representing Th1 / cytotoxic module in sputum during asthma exacerbations.	15	0.1316	1.43e-14	8.91e-13
RODWELL_AGING_KIDNEY_UP	487	Genes whose expression increases with age in normal kidney.	26	0.0534	1.51e-14	9.31e-13
FOSTER_TOLERANT_MACROPHAGE_DN	409	Class NT (non-tolerizeable) genes: induced during the first LPS stimulation and induced at equal or greater degree in tolerant macrophages.	24	0.0587	2.05e-14	1.25e-12
FARMER_BREAST_CANCER_CLUSTER_1	44	Cluster 1: interferon, T and B lymphocyte genes clustered together across breast cancer samples.	11	0.25	2.79e-14	1.65e-12
ZHAN_MULTIPLE_MYELOMA_LB_DN	44	Top 50 down-regulated genes in cluster LB of multiple myeloma samples belonging to the low bone disease group.	11	0.25	2.79e-14	1.65e-12
ZHU_CMV_ALL_UP	120	Up-regulated at any timepoint following infection of primary human foreskin fibroblasts with CMV	15	0.125	3.11e-14	1.82e-12
GRANDVAUX_IFN_RESPONSE_NOT_VIA_IRF3	14	Genes up-regulated in Jurkat cells (T lymphocyte) by IFN1@, and IFNB1 [GeneID=3438;3456] but not by overexpression of a constitutively active form of IRF3 [GeneID=3661].	8	0.5714	3.16e-14	1.82e-12
PICCALUGA_ANGIOIMMUNOBLASTIC_LYMPHOMA_UP	205	Up-regulated genes in angioimmunoblastic lymphoma (AILT) compared to normal T lymphocytes.	18	0.0878	4.32e-14	2.46e-12
ZHU_CMV_8_HR_UP	47	Up-regulated at 8 h following infection of primary human foreskin fibroblasts with CMV	11	0.234	6.2e-14	3.5e-12
SANA_TNF_SIGNALING_UP	83	Genes up-regulated in five primary endothelial cell types (lung, aortic, iliac, dermal, and colon) by TNF [GeneID=7124].	13	0.1566	8.17e-14	4.56e-12
GOZGIT_ESR1_TARGETS_DN	781	Genes down-regulated in TMX2-28 cells (breast cancer) which do not express ESR1 [GeneID=2099]) compared to the parental MCF7 cells which do.	31	0.0397	1.24e-13	6.85e-12
FLECHNER_BIOPSY_KIDNEY_TRANSPLANT_REJECTED_VS_OK_UP	87	Genes up-regulated in kidney biopsies from patients with acute transplant rejection compared to the biopsies from patients with well functioning kidneys more than 1-year post transplant.	13	0.1494	1.54e-13	8.38e-12
RICKMAN_METASTASIS_DN	261	Genes down-regulated in metastatic vs non-metastatic HNSCC (head and neck squamous cell carcinoma) samples.	19	0.0728	2.51e-13	1.35e-11
HORIUCHI_WTAP_TARGETS_UP	306	Genes up-regulated in primary endothelial cells (HUVEC) after knockdown of WTAP [GeneID=9589] by RNAi.	20	0.0654	4.38e-13	2.33e-11
KAMIKUBO_MYELOID_CEBPA_NETWORK	28	Network of differentially expressed myeloid genes centered around CEBPA [GeneID=1050].	9	0.3214	4.98e-13	2.62e-11
DODD_NASOPHARYNGEAL_CARCINOMA_DN	1375	Genes down-regulated in nasopharyngeal carcinoma (NPC) compared to the normal tissue.	40	0.0291	7.03e-13	3.66e-11
HIRSCH_CELLULAR_TRANSFORMATION_SIGNATURE_UP	242	Up-regulated genes in the cancer gene signature, representing a gene signature of cellular transformation.	18	0.0744	7.47e-13	3.82e-11
HAHTOLA_SEZARY_SYNDROM_UP	98	Genes up-regulated in monocytes isolated from peripheral blood samples of Sezary syndrom patients compared to those from healthy normal donors.	13	0.1327	7.49e-13	3.82e-11
REACTOME_INNATE_IMMUNE_SYSTEM	279	Genes involved in Innate Immune System	19	0.0681	8.23e-13	4.15e-11
LEI_MYB_TARGETS	318	Myb-regulated genes in MCF7 (breast cancer) and lung epithelial cell lines overexpressing MYBL2, MYBL1 or MYB [GeneID=4605;4603;4602].	20	0.0629	8.91e-13	4.44e-11
LIAN_LIPA_TARGETS_3M	59	Genes up-regulated at 3 months of age in lungs from LIPA [GeneID=3988] knockout mice, which display pulmonary pathology.	11	0.1864	9.18e-13	4.53e-11
VERHAAK_AML_WITH_NPM1_MUTATED_DN	246	Genes down-regulated in acute myeloid leukemia (AML) patients with mutated NPM1 [GeneID=4869].	18	0.0732	9.87e-13	4.82e-11
WIERENGA_STAT5A_TARGETS_UP	217	Genes up-regulated in CD34+ [GeneID=947] cells by intermediate activity levels of STAT5A [GeneID=6776]; predominant long-term growth and self-renewal phenotype.	17	0.0783	1.42e-12	6.85e-11
POOLA_INVASIVE_BREAST_CANCER_UP	288	Genes up-regulated in atypical ductal hyperplastic tissues from patients with (ADHC) breast cancer vs those without the cancer (ADH).	19	0.066	1.44e-12	6.9e-11
SENGUPTA_NASOPHARYNGEAL_CARCINOMA_UP	294	Genes up-regulated in nsopharyngeal carcinoma relative to the normal tissue.	19	0.0646	2.07e-12	9.82e-11
Gene/Gene Set Overlap Matrix
Entrez Gene Id	Gene Symbol	Gene Description	HECKER_IFNB1_TARGETS	FULCHER_INFLAMMATORY_RESPONSE_LECTIN_VS_LPS_DN	BROWNE_INTERFERON_RESPONSIVE_GENES	SANA_RESPONSE_TO_IFNG_UP	BOSCO_INTERFERON_INDUCED_ANTIVIRAL_MODULE	TAKEDA_TARGETS_OF_NUP98_HOXA9_FUSION_3D_UP	JISON_SICKLE_CELL_DISEASE_UP	BENNETT_SYSTEMIC_LUPUS_ERYTHEMATOSUS	MOSERLE_IFNA_RESPONSE	NUYTTEN_EZH2_TARGETS_UP	TAKEDA_TARGETS_OF_NUP98_HOXA9_FUSION_10D_UP	TAKEDA_TARGETS_OF_NUP98_HOXA9_FUSION_8D_UP	REACTOME_IMMUNE_SYSTEM	REACTOME_INTERFERON_SIGNALING	NUYTTEN_NIPP1_TARGETS_UP	WALLACE_PROSTATE_CANCER_RACE_UP	ALTEMEIER_RESPONSE_TO_LPS_WITH_MECHANICAL_VENTILATION	RADAEVA_RESPONSE_TO_IFNA1_UP	TAKEDA_TARGETS_OF_NUP98_HOXA9_FUSION_16D_UP	REACTOME_INTERFERON_ALPHA_BETA_SIGNALING	DAUER_STAT3_TARGETS_DN	REACTOME_CYTOKINE_SIGNALING_IN_IMMUNE_SYSTEM	REACTOME_INTERFERON_GAMMA_SIGNALING	MARKEY_RB1_ACUTE_LOF_DN	DEBIASI_APOPTOSIS_BY_REOVIRUS_INFECTION_UP	ONDER_CDH1_TARGETS_2_DN	ICHIBA_GRAFT_VERSUS_HOST_DISEASE_D7_UP	NABA_MATRISOME	FEVR_CTNNB1_TARGETS_UP	RUTELLA_RESPONSE_TO_HGF_VS_CSF2RB_AND_IL4_UP	ZHANG_INTERFERON_RESPONSE	BOWIE_RESPONSE_TO_TAMOXIFEN	GRAESSMANN_RESPONSE_TO_MC_AND_SERUM_DEPRIVATION_UP	YANG_BCL3_TARGETS_UP	DER_IFN_ALPHA_RESPONSE_UP	KRASNOSELSKAYA_ILF3_TARGETS_UP	UROSEVIC_RESPONSE_TO_IMIQUIMOD	BOWIE_RESPONSE_TO_EXTRACELLULAR_MATRIX	DELYS_THYROID_CANCER_UP	ICHIBA_GRAFT_VERSUS_HOST_DISEASE_35D_UP	CHEN_METABOLIC_SYNDROM_NETWORK	NABA_MATRISOME_ASSOCIATED	DER_IFN_BETA_RESPONSE_UP	MARTINELLI_IMMATURE_NEUTROPHIL_UP	SCHUETZ_BREAST_CANCER_DUCTAL_INVASIVE_UP	JAATINEN_HEMATOPOIETIC_STEM_CELL_DN	GRAESSMANN_APOPTOSIS_BY_SERUM_DEPRIVATION_UP
4939	OAS2	2'-5'-oligoadenylate synthetase 2, 69/71kDa	HECKER_IFNB1_TARGETS	FULCHER_INFLAMMATORY_RESPONSE_LECTIN_VS_LPS_DN	BROWNE_INTERFERON_RESPONSIVE_GENES	SANA_RESPONSE_TO_IFNG_UP	BOSCO_INTERFERON_INDUCED_ANTIVIRAL_MODULE	TAKEDA_TARGETS_OF_NUP98_HOXA9_FUSION_3D_UP		BENNETT_SYSTEMIC_LUPUS_ERYTHEMATOSUS	MOSERLE_IFNA_RESPONSE		TAKEDA_TARGETS_OF_NUP98_HOXA9_FUSION_10D_UP	TAKEDA_TARGETS_OF_NUP98_HOXA9_FUSION_8D_UP	REACTOME_IMMUNE_SYSTEM	REACTOME_INTERFERON_SIGNALING	NUYTTEN_NIPP1_TARGETS_UP	WALLACE_PROSTATE_CANCER_RACE_UP	ALTEMEIER_RESPONSE_TO_LPS_WITH_MECHANICAL_VENTILATION		TAKEDA_TARGETS_OF_NUP98_HOXA9_FUSION_16D_UP	REACTOME_INTERFERON_ALPHA_BETA_SIGNALING	DAUER_STAT3_TARGETS_DN	REACTOME_CYTOKINE_SIGNALING_IN_IMMUNE_SYSTEM	REACTOME_INTERFERON_GAMMA_SIGNALING		DEBIASI_APOPTOSIS_BY_REOVIRUS_INFECTION_UP				FEVR_CTNNB1_TARGETS_UP		ZHANG_INTERFERON_RESPONSE	BOWIE_RESPONSE_TO_TAMOXIFEN	GRAESSMANN_RESPONSE_TO_MC_AND_SERUM_DEPRIVATION_UP		DER_IFN_ALPHA_RESPONSE_UP		UROSEVIC_RESPONSE_TO_IMIQUIMOD						DER_IFN_BETA_RESPONSE_UP				GRAESSMANN_APOPTOSIS_BY_SERUM_DEPRIVATION_UP
10964	IFI44L	interferon-induced protein 44-like	HECKER_IFNB1_TARGETS	FULCHER_INFLAMMATORY_RESPONSE_LECTIN_VS_LPS_DN	BROWNE_INTERFERON_RESPONSIVE_GENES	SANA_RESPONSE_TO_IFNG_UP	BOSCO_INTERFERON_INDUCED_ANTIVIRAL_MODULE	TAKEDA_TARGETS_OF_NUP98_HOXA9_FUSION_3D_UP		BENNETT_SYSTEMIC_LUPUS_ERYTHEMATOSUS	MOSERLE_IFNA_RESPONSE		TAKEDA_TARGETS_OF_NUP98_HOXA9_FUSION_10D_UP	TAKEDA_TARGETS_OF_NUP98_HOXA9_FUSION_8D_UP			NUYTTEN_NIPP1_TARGETS_UP	WALLACE_PROSTATE_CANCER_RACE_UP		RADAEVA_RESPONSE_TO_IFNA1_UP	TAKEDA_TARGETS_OF_NUP98_HOXA9_FUSION_16D_UP						DEBIASI_APOPTOSIS_BY_REOVIRUS_INFECTION_UP									YANG_BCL3_TARGETS_UP
3627	CXCL10	chemokine (C-X-C motif) ligand 10	HECKER_IFNB1_TARGETS	FULCHER_INFLAMMATORY_RESPONSE_LECTIN_VS_LPS_DN	BROWNE_INTERFERON_RESPONSIVE_GENES	SANA_RESPONSE_TO_IFNG_UP		TAKEDA_TARGETS_OF_NUP98_HOXA9_FUSION_3D_UP	JISON_SICKLE_CELL_DISEASE_UP		MOSERLE_IFNA_RESPONSE	NUYTTEN_EZH2_TARGETS_UP	TAKEDA_TARGETS_OF_NUP98_HOXA9_FUSION_10D_UP						ALTEMEIER_RESPONSE_TO_LPS_WITH_MECHANICAL_VENTILATION	RADAEVA_RESPONSE_TO_IFNA1_UP						MARKEY_RB1_ACUTE_LOF_DN	DEBIASI_APOPTOSIS_BY_REOVIRUS_INFECTION_UP		ICHIBA_GRAFT_VERSUS_HOST_DISEASE_D7_UP	NABA_MATRISOME		RUTELLA_RESPONSE_TO_HGF_VS_CSF2RB_AND_IL4_UP			GRAESSMANN_RESPONSE_TO_MC_AND_SERUM_DEPRIVATION_UP	YANG_BCL3_TARGETS_UP								NABA_MATRISOME_ASSOCIATED					GRAESSMANN_APOPTOSIS_BY_SERUM_DEPRIVATION_UP
2633	GBP1	guanylate binding protein 1, interferon-inducible	HECKER_IFNB1_TARGETS	FULCHER_INFLAMMATORY_RESPONSE_LECTIN_VS_LPS_DN	BROWNE_INTERFERON_RESPONSIVE_GENES	SANA_RESPONSE_TO_IFNG_UP		TAKEDA_TARGETS_OF_NUP98_HOXA9_FUSION_3D_UP	JISON_SICKLE_CELL_DISEASE_UP		MOSERLE_IFNA_RESPONSE		TAKEDA_TARGETS_OF_NUP98_HOXA9_FUSION_10D_UP	TAKEDA_TARGETS_OF_NUP98_HOXA9_FUSION_8D_UP	REACTOME_IMMUNE_SYSTEM	REACTOME_INTERFERON_SIGNALING		WALLACE_PROSTATE_CANCER_RACE_UP	ALTEMEIER_RESPONSE_TO_LPS_WITH_MECHANICAL_VENTILATION					REACTOME_CYTOKINE_SIGNALING_IN_IMMUNE_SYSTEM	REACTOME_INTERFERON_GAMMA_SIGNALING	MARKEY_RB1_ACUTE_LOF_DN	DEBIASI_APOPTOSIS_BY_REOVIRUS_INFECTION_UP		ICHIBA_GRAFT_VERSUS_HOST_DISEASE_D7_UP								DER_IFN_ALPHA_RESPONSE_UP					ICHIBA_GRAFT_VERSUS_HOST_DISEASE_35D_UP			DER_IFN_BETA_RESPONSE_UP		SCHUETZ_BREAST_CANCER_DUCTAL_INVASIVE_UP
4938	OAS1	2'-5'-oligoadenylate synthetase 1, 40/46kDa	HECKER_IFNB1_TARGETS	FULCHER_INFLAMMATORY_RESPONSE_LECTIN_VS_LPS_DN	BROWNE_INTERFERON_RESPONSIVE_GENES	SANA_RESPONSE_TO_IFNG_UP		TAKEDA_TARGETS_OF_NUP98_HOXA9_FUSION_3D_UP		BENNETT_SYSTEMIC_LUPUS_ERYTHEMATOSUS	MOSERLE_IFNA_RESPONSE	NUYTTEN_EZH2_TARGETS_UP	TAKEDA_TARGETS_OF_NUP98_HOXA9_FUSION_10D_UP	TAKEDA_TARGETS_OF_NUP98_HOXA9_FUSION_8D_UP	REACTOME_IMMUNE_SYSTEM	REACTOME_INTERFERON_SIGNALING	NUYTTEN_NIPP1_TARGETS_UP			RADAEVA_RESPONSE_TO_IFNA1_UP		REACTOME_INTERFERON_ALPHA_BETA_SIGNALING	DAUER_STAT3_TARGETS_DN	REACTOME_CYTOKINE_SIGNALING_IN_IMMUNE_SYSTEM	REACTOME_INTERFERON_GAMMA_SIGNALING		DEBIASI_APOPTOSIS_BY_REOVIRUS_INFECTION_UP				FEVR_CTNNB1_TARGETS_UP		ZHANG_INTERFERON_RESPONSE	BOWIE_RESPONSE_TO_TAMOXIFEN			DER_IFN_ALPHA_RESPONSE_UP	KRASNOSELSKAYA_ILF3_TARGETS_UP	UROSEVIC_RESPONSE_TO_IMIQUIMOD	BOWIE_RESPONSE_TO_EXTRACELLULAR_MATRIX			CHEN_METABOLIC_SYNDROM_NETWORK		DER_IFN_BETA_RESPONSE_UP
8638	OASL	2'-5'-oligoadenylate synthetase-like	HECKER_IFNB1_TARGETS	FULCHER_INFLAMMATORY_RESPONSE_LECTIN_VS_LPS_DN	BROWNE_INTERFERON_RESPONSIVE_GENES		BOSCO_INTERFERON_INDUCED_ANTIVIRAL_MODULE	TAKEDA_TARGETS_OF_NUP98_HOXA9_FUSION_3D_UP	JISON_SICKLE_CELL_DISEASE_UP	BENNETT_SYSTEMIC_LUPUS_ERYTHEMATOSUS	MOSERLE_IFNA_RESPONSE	NUYTTEN_EZH2_TARGETS_UP	TAKEDA_TARGETS_OF_NUP98_HOXA9_FUSION_10D_UP		REACTOME_IMMUNE_SYSTEM	REACTOME_INTERFERON_SIGNALING	NUYTTEN_NIPP1_TARGETS_UP				TAKEDA_TARGETS_OF_NUP98_HOXA9_FUSION_16D_UP	REACTOME_INTERFERON_ALPHA_BETA_SIGNALING	DAUER_STAT3_TARGETS_DN	REACTOME_CYTOKINE_SIGNALING_IN_IMMUNE_SYSTEM	REACTOME_INTERFERON_GAMMA_SIGNALING		DEBIASI_APOPTOSIS_BY_REOVIRUS_INFECTION_UP				FEVR_CTNNB1_TARGETS_UP		ZHANG_INTERFERON_RESPONSE			YANG_BCL3_TARGETS_UP	DER_IFN_ALPHA_RESPONSE_UP		UROSEVIC_RESPONSE_TO_IMIQUIMOD				CHEN_METABOLIC_SYNDROM_NETWORK		DER_IFN_BETA_RESPONSE_UP				GRAESSMANN_APOPTOSIS_BY_SERUM_DEPRIVATION_UP
3437	IFIT3	interferon-induced protein with tetratricopeptide repeats 3	HECKER_IFNB1_TARGETS	FULCHER_INFLAMMATORY_RESPONSE_LECTIN_VS_LPS_DN	BROWNE_INTERFERON_RESPONSIVE_GENES		BOSCO_INTERFERON_INDUCED_ANTIVIRAL_MODULE	TAKEDA_TARGETS_OF_NUP98_HOXA9_FUSION_3D_UP	JISON_SICKLE_CELL_DISEASE_UP	BENNETT_SYSTEMIC_LUPUS_ERYTHEMATOSUS	MOSERLE_IFNA_RESPONSE		TAKEDA_TARGETS_OF_NUP98_HOXA9_FUSION_10D_UP	TAKEDA_TARGETS_OF_NUP98_HOXA9_FUSION_8D_UP	REACTOME_IMMUNE_SYSTEM	REACTOME_INTERFERON_SIGNALING		WALLACE_PROSTATE_CANCER_RACE_UP			TAKEDA_TARGETS_OF_NUP98_HOXA9_FUSION_16D_UP	REACTOME_INTERFERON_ALPHA_BETA_SIGNALING	DAUER_STAT3_TARGETS_DN	REACTOME_CYTOKINE_SIGNALING_IN_IMMUNE_SYSTEM		MARKEY_RB1_ACUTE_LOF_DN	DEBIASI_APOPTOSIS_BY_REOVIRUS_INFECTION_UP		ICHIBA_GRAFT_VERSUS_HOST_DISEASE_D7_UP		FEVR_CTNNB1_TARGETS_UP			BOWIE_RESPONSE_TO_TAMOXIFEN	GRAESSMANN_RESPONSE_TO_MC_AND_SERUM_DEPRIVATION_UP	YANG_BCL3_TARGETS_UP	DER_IFN_ALPHA_RESPONSE_UP	KRASNOSELSKAYA_ILF3_TARGETS_UP		BOWIE_RESPONSE_TO_EXTRACELLULAR_MATRIX			CHEN_METABOLIC_SYNDROM_NETWORK		DER_IFN_BETA_RESPONSE_UP				GRAESSMANN_APOPTOSIS_BY_SERUM_DEPRIVATION_UP
10561	IFI44	interferon-induced protein 44	HECKER_IFNB1_TARGETS	FULCHER_INFLAMMATORY_RESPONSE_LECTIN_VS_LPS_DN	BROWNE_INTERFERON_RESPONSIVE_GENES		BOSCO_INTERFERON_INDUCED_ANTIVIRAL_MODULE	TAKEDA_TARGETS_OF_NUP98_HOXA9_FUSION_3D_UP	JISON_SICKLE_CELL_DISEASE_UP		MOSERLE_IFNA_RESPONSE	NUYTTEN_EZH2_TARGETS_UP	TAKEDA_TARGETS_OF_NUP98_HOXA9_FUSION_10D_UP	TAKEDA_TARGETS_OF_NUP98_HOXA9_FUSION_8D_UP			NUYTTEN_NIPP1_TARGETS_UP	WALLACE_PROSTATE_CANCER_RACE_UP		RADAEVA_RESPONSE_TO_IFNA1_UP	TAKEDA_TARGETS_OF_NUP98_HOXA9_FUSION_16D_UP		DAUER_STAT3_TARGETS_DN				DEBIASI_APOPTOSIS_BY_REOVIRUS_INFECTION_UP						ZHANG_INTERFERON_RESPONSE		GRAESSMANN_RESPONSE_TO_MC_AND_SERUM_DEPRIVATION_UP		DER_IFN_ALPHA_RESPONSE_UP								DER_IFN_BETA_RESPONSE_UP				GRAESSMANN_APOPTOSIS_BY_SERUM_DEPRIVATION_UP
91543	RSAD2	radical S-adenosyl methionine domain containing 2	HECKER_IFNB1_TARGETS	FULCHER_INFLAMMATORY_RESPONSE_LECTIN_VS_LPS_DN	BROWNE_INTERFERON_RESPONSIVE_GENES		BOSCO_INTERFERON_INDUCED_ANTIVIRAL_MODULE	TAKEDA_TARGETS_OF_NUP98_HOXA9_FUSION_3D_UP	JISON_SICKLE_CELL_DISEASE_UP		MOSERLE_IFNA_RESPONSE		TAKEDA_TARGETS_OF_NUP98_HOXA9_FUSION_10D_UP	TAKEDA_TARGETS_OF_NUP98_HOXA9_FUSION_8D_UP			NUYTTEN_NIPP1_TARGETS_UP	WALLACE_PROSTATE_CANCER_RACE_UP		RADAEVA_RESPONSE_TO_IFNA1_UP	TAKEDA_TARGETS_OF_NUP98_HOXA9_FUSION_16D_UP						DEBIASI_APOPTOSIS_BY_REOVIRUS_INFECTION_UP					RUTELLA_RESPONSE_TO_HGF_VS_CSF2RB_AND_IL4_UP			GRAESSMANN_RESPONSE_TO_MC_AND_SERUM_DEPRIVATION_UP	YANG_BCL3_TARGETS_UP			UROSEVIC_RESPONSE_TO_IMIQUIMOD										GRAESSMANN_APOPTOSIS_BY_SERUM_DEPRIVATION_UP
54739	XAF1	XIAP associated factor 1	HECKER_IFNB1_TARGETS	FULCHER_INFLAMMATORY_RESPONSE_LECTIN_VS_LPS_DN	BROWNE_INTERFERON_RESPONSIVE_GENES		BOSCO_INTERFERON_INDUCED_ANTIVIRAL_MODULE	TAKEDA_TARGETS_OF_NUP98_HOXA9_FUSION_3D_UP		BENNETT_SYSTEMIC_LUPUS_ERYTHEMATOSUS		NUYTTEN_EZH2_TARGETS_UP	TAKEDA_TARGETS_OF_NUP98_HOXA9_FUSION_10D_UP	TAKEDA_TARGETS_OF_NUP98_HOXA9_FUSION_8D_UP	REACTOME_IMMUNE_SYSTEM	REACTOME_INTERFERON_SIGNALING	NUYTTEN_NIPP1_TARGETS_UP	WALLACE_PROSTATE_CANCER_RACE_UP			TAKEDA_TARGETS_OF_NUP98_HOXA9_FUSION_16D_UP	REACTOME_INTERFERON_ALPHA_BETA_SIGNALING		REACTOME_CYTOKINE_SIGNALING_IN_IMMUNE_SYSTEM														KRASNOSELSKAYA_ILF3_TARGETS_UP
3433	IFIT2	interferon-induced protein with tetratricopeptide repeats 2	HECKER_IFNB1_TARGETS	FULCHER_INFLAMMATORY_RESPONSE_LECTIN_VS_LPS_DN	BROWNE_INTERFERON_RESPONSIVE_GENES			TAKEDA_TARGETS_OF_NUP98_HOXA9_FUSION_3D_UP	JISON_SICKLE_CELL_DISEASE_UP		MOSERLE_IFNA_RESPONSE		TAKEDA_TARGETS_OF_NUP98_HOXA9_FUSION_10D_UP	TAKEDA_TARGETS_OF_NUP98_HOXA9_FUSION_8D_UP	REACTOME_IMMUNE_SYSTEM	REACTOME_INTERFERON_SIGNALING			ALTEMEIER_RESPONSE_TO_LPS_WITH_MECHANICAL_VENTILATION	RADAEVA_RESPONSE_TO_IFNA1_UP	TAKEDA_TARGETS_OF_NUP98_HOXA9_FUSION_16D_UP	REACTOME_INTERFERON_ALPHA_BETA_SIGNALING		REACTOME_CYTOKINE_SIGNALING_IN_IMMUNE_SYSTEM		MARKEY_RB1_ACUTE_LOF_DN	DEBIASI_APOPTOSIS_BY_REOVIRUS_INFECTION_UP						ZHANG_INTERFERON_RESPONSE	BOWIE_RESPONSE_TO_TAMOXIFEN	GRAESSMANN_RESPONSE_TO_MC_AND_SERUM_DEPRIVATION_UP	YANG_BCL3_TARGETS_UP				BOWIE_RESPONSE_TO_EXTRACELLULAR_MATRIX			CHEN_METABOLIC_SYNDROM_NETWORK		DER_IFN_BETA_RESPONSE_UP				GRAESSMANN_APOPTOSIS_BY_SERUM_DEPRIVATION_UP
3429	IFI27	interferon, alpha-inducible protein 27	HECKER_IFNB1_TARGETS	FULCHER_INFLAMMATORY_RESPONSE_LECTIN_VS_LPS_DN	BROWNE_INTERFERON_RESPONSIVE_GENES			TAKEDA_TARGETS_OF_NUP98_HOXA9_FUSION_3D_UP					TAKEDA_TARGETS_OF_NUP98_HOXA9_FUSION_10D_UP	TAKEDA_TARGETS_OF_NUP98_HOXA9_FUSION_8D_UP	REACTOME_IMMUNE_SYSTEM	REACTOME_INTERFERON_SIGNALING		WALLACE_PROSTATE_CANCER_RACE_UP		RADAEVA_RESPONSE_TO_IFNA1_UP	TAKEDA_TARGETS_OF_NUP98_HOXA9_FUSION_16D_UP	REACTOME_INTERFERON_ALPHA_BETA_SIGNALING	DAUER_STAT3_TARGETS_DN	REACTOME_CYTOKINE_SIGNALING_IN_IMMUNE_SYSTEM			DEBIASI_APOPTOSIS_BY_REOVIRUS_INFECTION_UP		ICHIBA_GRAFT_VERSUS_HOST_DISEASE_D7_UP				ZHANG_INTERFERON_RESPONSE	BOWIE_RESPONSE_TO_TAMOXIFEN				KRASNOSELSKAYA_ILF3_TARGETS_UP
219285	SAMD9L	sterile alpha motif domain containing 9-like	HECKER_IFNB1_TARGETS	FULCHER_INFLAMMATORY_RESPONSE_LECTIN_VS_LPS_DN		SANA_RESPONSE_TO_IFNG_UP	BOSCO_INTERFERON_INDUCED_ANTIVIRAL_MODULE	TAKEDA_TARGETS_OF_NUP98_HOXA9_FUSION_3D_UP			MOSERLE_IFNA_RESPONSE	NUYTTEN_EZH2_TARGETS_UP	TAKEDA_TARGETS_OF_NUP98_HOXA9_FUSION_10D_UP				NUYTTEN_NIPP1_TARGETS_UP
710	SERPING1	serpin peptidase inhibitor, clade G (C1 inhibitor), member 1	HECKER_IFNB1_TARGETS	FULCHER_INFLAMMATORY_RESPONSE_LECTIN_VS_LPS_DN		SANA_RESPONSE_TO_IFNG_UP		TAKEDA_TARGETS_OF_NUP98_HOXA9_FUSION_3D_UP	JISON_SICKLE_CELL_DISEASE_UP	BENNETT_SYSTEMIC_LUPUS_ERYTHEMATOSUS																MARKEY_RB1_ACUTE_LOF_DN				NABA_MATRISOME														NABA_MATRISOME_ASSOCIATED			SCHUETZ_BREAST_CANCER_DUCTAL_INVASIVE_UP
3959	LGALS3BP	lectin, galactoside-binding, soluble, 3 binding protein	HECKER_IFNB1_TARGETS	FULCHER_INFLAMMATORY_RESPONSE_LECTIN_VS_LPS_DN		SANA_RESPONSE_TO_IFNG_UP		TAKEDA_TARGETS_OF_NUP98_HOXA9_FUSION_3D_UP		BENNETT_SYSTEMIC_LUPUS_ERYTHEMATOSUS			TAKEDA_TARGETS_OF_NUP98_HOXA9_FUSION_10D_UP	TAKEDA_TARGETS_OF_NUP98_HOXA9_FUSION_8D_UP						RADAEVA_RESPONSE_TO_IFNA1_UP						MARKEY_RB1_ACUTE_LOF_DN			ICHIBA_GRAFT_VERSUS_HOST_DISEASE_D7_UP						GRAESSMANN_RESPONSE_TO_MC_AND_SERUM_DEPRIVATION_UP								CHEN_METABOLIC_SYNDROM_NETWORK						GRAESSMANN_APOPTOSIS_BY_SERUM_DEPRIVATION_UP
94240	EPSTI1	epithelial stromal interaction 1 (breast)	HECKER_IFNB1_TARGETS	FULCHER_INFLAMMATORY_RESPONSE_LECTIN_VS_LPS_DN			BOSCO_INTERFERON_INDUCED_ANTIVIRAL_MODULE	TAKEDA_TARGETS_OF_NUP98_HOXA9_FUSION_3D_UP			MOSERLE_IFNA_RESPONSE	NUYTTEN_EZH2_TARGETS_UP	TAKEDA_TARGETS_OF_NUP98_HOXA9_FUSION_10D_UP	TAKEDA_TARGETS_OF_NUP98_HOXA9_FUSION_8D_UP			NUYTTEN_NIPP1_TARGETS_UP				TAKEDA_TARGETS_OF_NUP98_HOXA9_FUSION_16D_UP																						CHEN_METABOLIC_SYNDROM_NETWORK
4940	OAS3	2'-5'-oligoadenylate synthetase 3, 100kDa	HECKER_IFNB1_TARGETS	FULCHER_INFLAMMATORY_RESPONSE_LECTIN_VS_LPS_DN			BOSCO_INTERFERON_INDUCED_ANTIVIRAL_MODULE	TAKEDA_TARGETS_OF_NUP98_HOXA9_FUSION_3D_UP				NUYTTEN_EZH2_TARGETS_UP	TAKEDA_TARGETS_OF_NUP98_HOXA9_FUSION_10D_UP	TAKEDA_TARGETS_OF_NUP98_HOXA9_FUSION_8D_UP	REACTOME_IMMUNE_SYSTEM	REACTOME_INTERFERON_SIGNALING			ALTEMEIER_RESPONSE_TO_LPS_WITH_MECHANICAL_VENTILATION		TAKEDA_TARGETS_OF_NUP98_HOXA9_FUSION_16D_UP	REACTOME_INTERFERON_ALPHA_BETA_SIGNALING	DAUER_STAT3_TARGETS_DN	REACTOME_CYTOKINE_SIGNALING_IN_IMMUNE_SYSTEM	REACTOME_INTERFERON_GAMMA_SIGNALING			ONDER_CDH1_TARGETS_2_DN					ZHANG_INTERFERON_RESPONSE																GRAESSMANN_APOPTOSIS_BY_SERUM_DEPRIVATION_UP
4061	LY6E	lymphocyte antigen 6 complex, locus E	HECKER_IFNB1_TARGETS	FULCHER_INFLAMMATORY_RESPONSE_LECTIN_VS_LPS_DN				TAKEDA_TARGETS_OF_NUP98_HOXA9_FUSION_3D_UP	JISON_SICKLE_CELL_DISEASE_UP	BENNETT_SYSTEMIC_LUPUS_ERYTHEMATOSUS			TAKEDA_TARGETS_OF_NUP98_HOXA9_FUSION_10D_UP	TAKEDA_TARGETS_OF_NUP98_HOXA9_FUSION_8D_UP							TAKEDA_TARGETS_OF_NUP98_HOXA9_FUSION_16D_UP										FEVR_CTNNB1_TARGETS_UP										DELYS_THYROID_CANCER_UP
129607	CMPK2	cytidine monophosphate (UMP-CMP) kinase 2, mitochondrial	HECKER_IFNB1_TARGETS	FULCHER_INFLAMMATORY_RESPONSE_LECTIN_VS_LPS_DN				TAKEDA_TARGETS_OF_NUP98_HOXA9_FUSION_3D_UP			MOSERLE_IFNA_RESPONSE		TAKEDA_TARGETS_OF_NUP98_HOXA9_FUSION_10D_UP						ALTEMEIER_RESPONSE_TO_LPS_WITH_MECHANICAL_VENTILATION		TAKEDA_TARGETS_OF_NUP98_HOXA9_FUSION_16D_UP					MARKEY_RB1_ACUTE_LOF_DN					FEVR_CTNNB1_TARGETS_UP				GRAESSMANN_RESPONSE_TO_MC_AND_SERUM_DEPRIVATION_UP	YANG_BCL3_TARGETS_UP													GRAESSMANN_APOPTOSIS_BY_SERUM_DEPRIVATION_UP
55281	TMEM140	transmembrane protein 140	HECKER_IFNB1_TARGETS	FULCHER_INFLAMMATORY_RESPONSE_LECTIN_VS_LPS_DN								NUYTTEN_EZH2_TARGETS_UP					NUYTTEN_NIPP1_TARGETS_UP														FEVR_CTNNB1_TARGETS_UP				GRAESSMANN_RESPONSE_TO_MC_AND_SERUM_DEPRIVATION_UP	YANG_BCL3_TARGETS_UP													GRAESSMANN_APOPTOSIS_BY_SERUM_DEPRIVATION_UP
7130	TNFAIP6	tumor necrosis factor, alpha-induced protein 6	HECKER_IFNB1_TARGETS	FULCHER_INFLAMMATORY_RESPONSE_LECTIN_VS_LPS_DN									TAKEDA_TARGETS_OF_NUP98_HOXA9_FUSION_10D_UP	TAKEDA_TARGETS_OF_NUP98_HOXA9_FUSION_8D_UP																NABA_MATRISOME		RUTELLA_RESPONSE_TO_HGF_VS_CSF2RB_AND_IL4_UP									DELYS_THYROID_CANCER_UP		CHEN_METABOLIC_SYNDROM_NETWORK				SCHUETZ_BREAST_CANCER_DUCTAL_INVASIVE_UP
51338	MS4A4A	membrane-spanning 4-domains, subfamily A, member 4	HECKER_IFNB1_TARGETS	FULCHER_INFLAMMATORY_RESPONSE_LECTIN_VS_LPS_DN														WALLACE_PROSTATE_CANCER_RACE_UP														RUTELLA_RESPONSE_TO_HGF_VS_CSF2RB_AND_IL4_UP															SCHUETZ_BREAST_CANCER_DUCTAL_INVASIVE_UP
719	C3AR1	complement component 3a receptor 1	HECKER_IFNB1_TARGETS	FULCHER_INFLAMMATORY_RESPONSE_LECTIN_VS_LPS_DN																						MARKEY_RB1_ACUTE_LOF_DN						RUTELLA_RESPONSE_TO_HGF_VS_CSF2RB_AND_IL4_UP									DELYS_THYROID_CANCER_UP		CHEN_METABOLIC_SYNDROM_NETWORK				SCHUETZ_BREAST_CANCER_DUCTAL_INVASIVE_UP
6614	SIGLEC1	sialic acid binding Ig-like lectin 1, sialoadhesin	HECKER_IFNB1_TARGETS	FULCHER_INFLAMMATORY_RESPONSE_LECTIN_VS_LPS_DN
3430	IFI35	interferon-induced protein 35	HECKER_IFNB1_TARGETS		BROWNE_INTERFERON_RESPONSIVE_GENES	SANA_RESPONSE_TO_IFNG_UP	BOSCO_INTERFERON_INDUCED_ANTIVIRAL_MODULE	TAKEDA_TARGETS_OF_NUP98_HOXA9_FUSION_3D_UP	JISON_SICKLE_CELL_DISEASE_UP	BENNETT_SYSTEMIC_LUPUS_ERYTHEMATOSUS					REACTOME_IMMUNE_SYSTEM	REACTOME_INTERFERON_SIGNALING				RADAEVA_RESPONSE_TO_IFNA1_UP		REACTOME_INTERFERON_ALPHA_BETA_SIGNALING	DAUER_STAT3_TARGETS_DN	REACTOME_CYTOKINE_SIGNALING_IN_IMMUNE_SYSTEM		MARKEY_RB1_ACUTE_LOF_DN	DEBIASI_APOPTOSIS_BY_REOVIRUS_INFECTION_UP		ICHIBA_GRAFT_VERSUS_HOST_DISEASE_D7_UP					BOWIE_RESPONSE_TO_TAMOXIFEN	GRAESSMANN_RESPONSE_TO_MC_AND_SERUM_DEPRIVATION_UP	YANG_BCL3_TARGETS_UP	DER_IFN_ALPHA_RESPONSE_UP	KRASNOSELSKAYA_ILF3_TARGETS_UP	UROSEVIC_RESPONSE_TO_IMIQUIMOD	BOWIE_RESPONSE_TO_EXTRACELLULAR_MATRIX					DER_IFN_BETA_RESPONSE_UP				GRAESSMANN_APOPTOSIS_BY_SERUM_DEPRIVATION_UP
3665	IRF7	interferon regulatory factor 7	HECKER_IFNB1_TARGETS		BROWNE_INTERFERON_RESPONSIVE_GENES		BOSCO_INTERFERON_INDUCED_ANTIVIRAL_MODULE	TAKEDA_TARGETS_OF_NUP98_HOXA9_FUSION_3D_UP		BENNETT_SYSTEMIC_LUPUS_ERYTHEMATOSUS			TAKEDA_TARGETS_OF_NUP98_HOXA9_FUSION_10D_UP	TAKEDA_TARGETS_OF_NUP98_HOXA9_FUSION_8D_UP	REACTOME_IMMUNE_SYSTEM	REACTOME_INTERFERON_SIGNALING			ALTEMEIER_RESPONSE_TO_LPS_WITH_MECHANICAL_VENTILATION	RADAEVA_RESPONSE_TO_IFNA1_UP		REACTOME_INTERFERON_ALPHA_BETA_SIGNALING	DAUER_STAT3_TARGETS_DN	REACTOME_CYTOKINE_SIGNALING_IN_IMMUNE_SYSTEM	REACTOME_INTERFERON_GAMMA_SIGNALING	MARKEY_RB1_ACUTE_LOF_DN	DEBIASI_APOPTOSIS_BY_REOVIRUS_INFECTION_UP		ICHIBA_GRAFT_VERSUS_HOST_DISEASE_D7_UP		FEVR_CTNNB1_TARGETS_UP			BOWIE_RESPONSE_TO_TAMOXIFEN	GRAESSMANN_RESPONSE_TO_MC_AND_SERUM_DEPRIVATION_UP	YANG_BCL3_TARGETS_UP			UROSEVIC_RESPONSE_TO_IMIQUIMOD	BOWIE_RESPONSE_TO_EXTRACELLULAR_MATRIX									GRAESSMANN_APOPTOSIS_BY_SERUM_DEPRIVATION_UP
2537	IFI6	interferon, alpha-inducible protein 6	HECKER_IFNB1_TARGETS		BROWNE_INTERFERON_RESPONSIVE_GENES		BOSCO_INTERFERON_INDUCED_ANTIVIRAL_MODULE	TAKEDA_TARGETS_OF_NUP98_HOXA9_FUSION_3D_UP					TAKEDA_TARGETS_OF_NUP98_HOXA9_FUSION_10D_UP	TAKEDA_TARGETS_OF_NUP98_HOXA9_FUSION_8D_UP	REACTOME_IMMUNE_SYSTEM	REACTOME_INTERFERON_SIGNALING	NUYTTEN_NIPP1_TARGETS_UP	WALLACE_PROSTATE_CANCER_RACE_UP		RADAEVA_RESPONSE_TO_IFNA1_UP	TAKEDA_TARGETS_OF_NUP98_HOXA9_FUSION_16D_UP	REACTOME_INTERFERON_ALPHA_BETA_SIGNALING		REACTOME_CYTOKINE_SIGNALING_IN_IMMUNE_SYSTEM			DEBIASI_APOPTOSIS_BY_REOVIRUS_INFECTION_UP					RUTELLA_RESPONSE_TO_HGF_VS_CSF2RB_AND_IL4_UP		BOWIE_RESPONSE_TO_TAMOXIFEN			DER_IFN_ALPHA_RESPONSE_UP	KRASNOSELSKAYA_ILF3_TARGETS_UP	UROSEVIC_RESPONSE_TO_IMIQUIMOD	BOWIE_RESPONSE_TO_EXTRACELLULAR_MATRIX					DER_IFN_BETA_RESPONSE_UP
6772	STAT1	signal transducer and activator of transcription 1, 91kDa	HECKER_IFNB1_TARGETS		BROWNE_INTERFERON_RESPONSIVE_GENES			TAKEDA_TARGETS_OF_NUP98_HOXA9_FUSION_3D_UP	JISON_SICKLE_CELL_DISEASE_UP	BENNETT_SYSTEMIC_LUPUS_ERYTHEMATOSUS	MOSERLE_IFNA_RESPONSE	NUYTTEN_EZH2_TARGETS_UP	TAKEDA_TARGETS_OF_NUP98_HOXA9_FUSION_10D_UP	TAKEDA_TARGETS_OF_NUP98_HOXA9_FUSION_8D_UP	REACTOME_IMMUNE_SYSTEM	REACTOME_INTERFERON_SIGNALING	NUYTTEN_NIPP1_TARGETS_UP	WALLACE_PROSTATE_CANCER_RACE_UP	ALTEMEIER_RESPONSE_TO_LPS_WITH_MECHANICAL_VENTILATION	RADAEVA_RESPONSE_TO_IFNA1_UP	TAKEDA_TARGETS_OF_NUP98_HOXA9_FUSION_16D_UP	REACTOME_INTERFERON_ALPHA_BETA_SIGNALING	DAUER_STAT3_TARGETS_DN	REACTOME_CYTOKINE_SIGNALING_IN_IMMUNE_SYSTEM	REACTOME_INTERFERON_GAMMA_SIGNALING	MARKEY_RB1_ACUTE_LOF_DN	DEBIASI_APOPTOSIS_BY_REOVIRUS_INFECTION_UP		ICHIBA_GRAFT_VERSUS_HOST_DISEASE_D7_UP		FEVR_CTNNB1_TARGETS_UP	RUTELLA_RESPONSE_TO_HGF_VS_CSF2RB_AND_IL4_UP	ZHANG_INTERFERON_RESPONSE	BOWIE_RESPONSE_TO_TAMOXIFEN	GRAESSMANN_RESPONSE_TO_MC_AND_SERUM_DEPRIVATION_UP		DER_IFN_ALPHA_RESPONSE_UP	KRASNOSELSKAYA_ILF3_TARGETS_UP	UROSEVIC_RESPONSE_TO_IMIQUIMOD	BOWIE_RESPONSE_TO_EXTRACELLULAR_MATRIX	DELYS_THYROID_CANCER_UP	ICHIBA_GRAFT_VERSUS_HOST_DISEASE_35D_UP			DER_IFN_BETA_RESPONSE_UP				GRAESSMANN_APOPTOSIS_BY_SERUM_DEPRIVATION_UP
9636	ISG15	ISG15 ubiquitin-like modifier	HECKER_IFNB1_TARGETS		BROWNE_INTERFERON_RESPONSIVE_GENES			TAKEDA_TARGETS_OF_NUP98_HOXA9_FUSION_3D_UP		BENNETT_SYSTEMIC_LUPUS_ERYTHEMATOSUS			TAKEDA_TARGETS_OF_NUP98_HOXA9_FUSION_10D_UP	TAKEDA_TARGETS_OF_NUP98_HOXA9_FUSION_8D_UP	REACTOME_IMMUNE_SYSTEM	REACTOME_INTERFERON_SIGNALING	NUYTTEN_NIPP1_TARGETS_UP	WALLACE_PROSTATE_CANCER_RACE_UP	ALTEMEIER_RESPONSE_TO_LPS_WITH_MECHANICAL_VENTILATION	RADAEVA_RESPONSE_TO_IFNA1_UP	TAKEDA_TARGETS_OF_NUP98_HOXA9_FUSION_16D_UP	REACTOME_INTERFERON_ALPHA_BETA_SIGNALING	DAUER_STAT3_TARGETS_DN	REACTOME_CYTOKINE_SIGNALING_IN_IMMUNE_SYSTEM		MARKEY_RB1_ACUTE_LOF_DN	DEBIASI_APOPTOSIS_BY_REOVIRUS_INFECTION_UP		ICHIBA_GRAFT_VERSUS_HOST_DISEASE_D7_UP				ZHANG_INTERFERON_RESPONSE	BOWIE_RESPONSE_TO_TAMOXIFEN	GRAESSMANN_RESPONSE_TO_MC_AND_SERUM_DEPRIVATION_UP		DER_IFN_ALPHA_RESPONSE_UP	KRASNOSELSKAYA_ILF3_TARGETS_UP	UROSEVIC_RESPONSE_TO_IMIQUIMOD	BOWIE_RESPONSE_TO_EXTRACELLULAR_MATRIX					DER_IFN_BETA_RESPONSE_UP				GRAESSMANN_APOPTOSIS_BY_SERUM_DEPRIVATION_UP
1890	TYMP	thymidine phosphorylase	HECKER_IFNB1_TARGETS		BROWNE_INTERFERON_RESPONSIVE_GENES				JISON_SICKLE_CELL_DISEASE_UP			NUYTTEN_EZH2_TARGETS_UP						WALLACE_PROSTATE_CANCER_RACE_UP													FEVR_CTNNB1_TARGETS_UP
5359	PLSCR1	phospholipid scramblase 1	HECKER_IFNB1_TARGETS		BROWNE_INTERFERON_RESPONSIVE_GENES					BENNETT_SYSTEMIC_LUPUS_ERYTHEMATOSUS		NUYTTEN_EZH2_TARGETS_UP					NUYTTEN_NIPP1_TARGETS_UP			RADAEVA_RESPONSE_TO_IFNA1_UP							DEBIASI_APOPTOSIS_BY_REOVIRUS_INFECTION_UP					RUTELLA_RESPONSE_TO_HGF_VS_CSF2RB_AND_IL4_UP					DER_IFN_ALPHA_RESPONSE_UP	KRASNOSELSKAYA_ILF3_TARGETS_UP					CHEN_METABOLIC_SYNDROM_NETWORK		DER_IFN_BETA_RESPONSE_UP				GRAESSMANN_APOPTOSIS_BY_SERUM_DEPRIVATION_UP
55601	DDX60	DEAD (Asp-Glu-Ala-Asp) box polypeptide 60	HECKER_IFNB1_TARGETS			SANA_RESPONSE_TO_IFNG_UP	BOSCO_INTERFERON_INDUCED_ANTIVIRAL_MODULE	TAKEDA_TARGETS_OF_NUP98_HOXA9_FUSION_3D_UP			MOSERLE_IFNA_RESPONSE	NUYTTEN_EZH2_TARGETS_UP	TAKEDA_TARGETS_OF_NUP98_HOXA9_FUSION_10D_UP	TAKEDA_TARGETS_OF_NUP98_HOXA9_FUSION_8D_UP			NUYTTEN_NIPP1_TARGETS_UP	WALLACE_PROSTATE_CANCER_RACE_UP					DAUER_STAT3_TARGETS_DN					ONDER_CDH1_TARGETS_2_DN			FEVR_CTNNB1_TARGETS_UP				GRAESSMANN_RESPONSE_TO_MC_AND_SERUM_DEPRIVATION_UP	YANG_BCL3_TARGETS_UP													GRAESSMANN_APOPTOSIS_BY_SERUM_DEPRIVATION_UP
83666	PARP9	poly (ADP-ribose) polymerase family, member 9	HECKER_IFNB1_TARGETS			SANA_RESPONSE_TO_IFNG_UP		TAKEDA_TARGETS_OF_NUP98_HOXA9_FUSION_3D_UP				NUYTTEN_EZH2_TARGETS_UP					NUYTTEN_NIPP1_TARGETS_UP																		GRAESSMANN_RESPONSE_TO_MC_AND_SERUM_DEPRIVATION_UP														GRAESSMANN_APOPTOSIS_BY_SERUM_DEPRIVATION_UP
51056	LAP3	leucine aminopeptidase 3	HECKER_IFNB1_TARGETS			SANA_RESPONSE_TO_IFNG_UP						NUYTTEN_EZH2_TARGETS_UP											DAUER_STAT3_TARGETS_DN
27074	LAMP3	lysosomal-associated membrane protein 3	HECKER_IFNB1_TARGETS				BOSCO_INTERFERON_INDUCED_ANTIVIRAL_MODULE					NUYTTEN_EZH2_TARGETS_UP					NUYTTEN_NIPP1_TARGETS_UP	WALLACE_PROSTATE_CANCER_RACE_UP			TAKEDA_TARGETS_OF_NUP98_HOXA9_FUSION_16D_UP		DAUER_STAT3_TARGETS_DN																										GRAESSMANN_APOPTOSIS_BY_SERUM_DEPRIVATION_UP
81030	ZBP1	Z-DNA binding protein 1	HECKER_IFNB1_TARGETS				BOSCO_INTERFERON_INDUCED_ANTIVIRAL_MODULE								REACTOME_IMMUNE_SYSTEM																FEVR_CTNNB1_TARGETS_UP				GRAESSMANN_RESPONSE_TO_MC_AND_SERUM_DEPRIVATION_UP														GRAESSMANN_APOPTOSIS_BY_SERUM_DEPRIVATION_UP
10398	MYL9	myosin, light chain 9, regulatory	HECKER_IFNB1_TARGETS						JISON_SICKLE_CELL_DISEASE_UP																											YANG_BCL3_TARGETS_UP											SCHUETZ_BREAST_CANCER_DUCTAL_INVASIVE_UP
3674	ITGA2B	integrin, alpha 2b (platelet glycoprotein IIb of IIb/IIIa complex, antigen CD41)	HECKER_IFNB1_TARGETS						JISON_SICKLE_CELL_DISEASE_UP
64108	RTP4	receptor (chemosensory) transporter protein 4	HECKER_IFNB1_TARGETS								MOSERLE_IFNA_RESPONSE	NUYTTEN_EZH2_TARGETS_UP	TAKEDA_TARGETS_OF_NUP98_HOXA9_FUSION_10D_UP				NUYTTEN_NIPP1_TARGETS_UP																ZHANG_INTERFERON_RESPONSE		GRAESSMANN_RESPONSE_TO_MC_AND_SERUM_DEPRIVATION_UP	YANG_BCL3_TARGETS_UP													GRAESSMANN_APOPTOSIS_BY_SERUM_DEPRIVATION_UP
50486	G0S2	G0/G1switch 2	HECKER_IFNB1_TARGETS									NUYTTEN_EZH2_TARGETS_UP					NUYTTEN_NIPP1_TARGETS_UP											ONDER_CDH1_TARGETS_2_DN			FEVR_CTNNB1_TARGETS_UP										DELYS_THYROID_CANCER_UP
5627	PROS1	protein S (alpha)	HECKER_IFNB1_TARGETS												REACTOME_IMMUNE_SYSTEM		NUYTTEN_NIPP1_TARGETS_UP																					KRASNOSELSKAYA_ILF3_TARGETS_UP			DELYS_THYROID_CANCER_UP						SCHUETZ_BREAST_CANCER_DUCTAL_INVASIVE_UP
713	C1QB	complement component 1, q subcomponent, B chain	HECKER_IFNB1_TARGETS												REACTOME_IMMUNE_SYSTEM			WALLACE_PROSTATE_CANCER_RACE_UP								MARKEY_RB1_ACUTE_LOF_DN			ICHIBA_GRAFT_VERSUS_HOST_DISEASE_D7_UP	NABA_MATRISOME											DELYS_THYROID_CANCER_UP	ICHIBA_GRAFT_VERSUS_HOST_DISEASE_35D_UP	CHEN_METABOLIC_SYNDROM_NETWORK	NABA_MATRISOME_ASSOCIATED			SCHUETZ_BREAST_CANCER_DUCTAL_INVASIVE_UP
712	C1QA	complement component 1, q subcomponent, A chain	HECKER_IFNB1_TARGETS												REACTOME_IMMUNE_SYSTEM			WALLACE_PROSTATE_CANCER_RACE_UP												NABA_MATRISOME		RUTELLA_RESPONSE_TO_HGF_VS_CSF2RB_AND_IL4_UP									DELYS_THYROID_CANCER_UP	ICHIBA_GRAFT_VERSUS_HOST_DISEASE_35D_UP		NABA_MATRISOME_ASSOCIATED			SCHUETZ_BREAST_CANCER_DUCTAL_INVASIVE_UP
714	C1QC	complement component 1, q subcomponent, C chain	HECKER_IFNB1_TARGETS												REACTOME_IMMUNE_SYSTEM											MARKEY_RB1_ACUTE_LOF_DN			ICHIBA_GRAFT_VERSUS_HOST_DISEASE_D7_UP	NABA_MATRISOME												ICHIBA_GRAFT_VERSUS_HOST_DISEASE_35D_UP	CHEN_METABOLIC_SYNDROM_NETWORK	NABA_MATRISOME_ASSOCIATED
4318	MMP9	matrix metallopeptidase 9 (gelatinase B, 92kDa gelatinase, 92kDa type IV collagenase)	HECKER_IFNB1_TARGETS															WALLACE_PROSTATE_CANCER_RACE_UP										ONDER_CDH1_TARGETS_2_DN		NABA_MATRISOME		RUTELLA_RESPONSE_TO_HGF_VS_CSF2RB_AND_IL4_UP												NABA_MATRISOME_ASSOCIATED				JAATINEN_HEMATOPOIETIC_STEM_CELL_DN
3772	KCNJ15	potassium inwardly-rectifying channel, subfamily J, member 15	HECKER_IFNB1_TARGETS																									ONDER_CDH1_TARGETS_2_DN
9997	SCO2	SCO cytochrome oxidase deficient homolog 2 (yeast)	HECKER_IFNB1_TARGETS																													RUTELLA_RESPONSE_TO_HGF_VS_CSF2RB_AND_IL4_UP
10346	TRIM22	tripartite motif containing 22		FULCHER_INFLAMMATORY_RESPONSE_LECTIN_VS_LPS_DN	BROWNE_INTERFERON_RESPONSIVE_GENES	SANA_RESPONSE_TO_IFNG_UP	BOSCO_INTERFERON_INDUCED_ANTIVIRAL_MODULE	TAKEDA_TARGETS_OF_NUP98_HOXA9_FUSION_3D_UP			MOSERLE_IFNA_RESPONSE	NUYTTEN_EZH2_TARGETS_UP					NUYTTEN_NIPP1_TARGETS_UP						DAUER_STAT3_TARGETS_DN				DEBIASI_APOPTOSIS_BY_REOVIRUS_INFECTION_UP										DER_IFN_ALPHA_RESPONSE_UP	KRASNOSELSKAYA_ILF3_TARGETS_UP			DELYS_THYROID_CANCER_UP				DER_IFN_BETA_RESPONSE_UP		SCHUETZ_BREAST_CANCER_DUCTAL_INVASIVE_UP
8743	TNFSF10	tumor necrosis factor (ligand) superfamily, member 10		FULCHER_INFLAMMATORY_RESPONSE_LECTIN_VS_LPS_DN	BROWNE_INTERFERON_RESPONSIVE_GENES	SANA_RESPONSE_TO_IFNG_UP	BOSCO_INTERFERON_INDUCED_ANTIVIRAL_MODULE			BENNETT_SYSTEMIC_LUPUS_ERYTHEMATOSUS	MOSERLE_IFNA_RESPONSE	NUYTTEN_EZH2_TARGETS_UP					NUYTTEN_NIPP1_TARGETS_UP			RADAEVA_RESPONSE_TO_IFNA1_UP	TAKEDA_TARGETS_OF_NUP98_HOXA9_FUSION_16D_UP		DAUER_STAT3_TARGETS_DN					ONDER_CDH1_TARGETS_2_DN		NABA_MATRISOME														NABA_MATRISOME_ASSOCIATED
3620	IDO1	indoleamine 2,3-dioxygenase 1		FULCHER_INFLAMMATORY_RESPONSE_LECTIN_VS_LPS_DN	BROWNE_INTERFERON_RESPONSIVE_GENES	SANA_RESPONSE_TO_IFNG_UP		TAKEDA_TARGETS_OF_NUP98_HOXA9_FUSION_3D_UP					TAKEDA_TARGETS_OF_NUP98_HOXA9_FUSION_10D_UP	TAKEDA_TARGETS_OF_NUP98_HOXA9_FUSION_8D_UP			NUYTTEN_NIPP1_TARGETS_UP	WALLACE_PROSTATE_CANCER_RACE_UP			TAKEDA_TARGETS_OF_NUP98_HOXA9_FUSION_16D_UP											RUTELLA_RESPONSE_TO_HGF_VS_CSF2RB_AND_IL4_UP							UROSEVIC_RESPONSE_TO_IMIQUIMOD
9246	UBE2L6	ubiquitin-conjugating enzyme E2L 6		FULCHER_INFLAMMATORY_RESPONSE_LECTIN_VS_LPS_DN	BROWNE_INTERFERON_RESPONSIVE_GENES	SANA_RESPONSE_TO_IFNG_UP			JISON_SICKLE_CELL_DISEASE_UP			NUYTTEN_EZH2_TARGETS_UP			REACTOME_IMMUNE_SYSTEM	REACTOME_INTERFERON_SIGNALING		WALLACE_PROSTATE_CANCER_RACE_UP		RADAEVA_RESPONSE_TO_IFNA1_UP				REACTOME_CYTOKINE_SIGNALING_IN_IMMUNE_SYSTEM		MARKEY_RB1_ACUTE_LOF_DN	DEBIASI_APOPTOSIS_BY_REOVIRUS_INFECTION_UP									YANG_BCL3_TARGETS_UP
2643	GCH1	GTP cyclohydrolase 1		FULCHER_INFLAMMATORY_RESPONSE_LECTIN_VS_LPS_DN	BROWNE_INTERFERON_RESPONSIVE_GENES		BOSCO_INTERFERON_INDUCED_ANTIVIRAL_MODULE							TAKEDA_TARGETS_OF_NUP98_HOXA9_FUSION_8D_UP					ALTEMEIER_RESPONSE_TO_LPS_WITH_MECHANICAL_VENTILATION									ONDER_CDH1_TARGETS_2_DN								YANG_BCL3_TARGETS_UP							CHEN_METABOLIC_SYNDROM_NETWORK
2634	GBP2	guanylate binding protein 2, interferon-inducible		FULCHER_INFLAMMATORY_RESPONSE_LECTIN_VS_LPS_DN	BROWNE_INTERFERON_RESPONSIVE_GENES				JISON_SICKLE_CELL_DISEASE_UP			NUYTTEN_EZH2_TARGETS_UP			REACTOME_IMMUNE_SYSTEM	REACTOME_INTERFERON_SIGNALING	NUYTTEN_NIPP1_TARGETS_UP					REACTOME_INTERFERON_ALPHA_BETA_SIGNALING		REACTOME_CYTOKINE_SIGNALING_IN_IMMUNE_SYSTEM	REACTOME_INTERFERON_GAMMA_SIGNALING	MARKEY_RB1_ACUTE_LOF_DN			ICHIBA_GRAFT_VERSUS_HOST_DISEASE_D7_UP							YANG_BCL3_TARGETS_UP					DELYS_THYROID_CANCER_UP
3601	IL15RA	interleukin 15 receptor, alpha		FULCHER_INFLAMMATORY_RESPONSE_LECTIN_VS_LPS_DN	BROWNE_INTERFERON_RESPONSIVE_GENES							NUYTTEN_EZH2_TARGETS_UP																ONDER_CDH1_TARGETS_2_DN
64135	IFIH1	interferon induced with helicase C domain 1		FULCHER_INFLAMMATORY_RESPONSE_LECTIN_VS_LPS_DN		SANA_RESPONSE_TO_IFNG_UP	BOSCO_INTERFERON_INDUCED_ANTIVIRAL_MODULE	TAKEDA_TARGETS_OF_NUP98_HOXA9_FUSION_3D_UP			MOSERLE_IFNA_RESPONSE	NUYTTEN_EZH2_TARGETS_UP	TAKEDA_TARGETS_OF_NUP98_HOXA9_FUSION_10D_UP	TAKEDA_TARGETS_OF_NUP98_HOXA9_FUSION_8D_UP	REACTOME_IMMUNE_SYSTEM		NUYTTEN_NIPP1_TARGETS_UP		ALTEMEIER_RESPONSE_TO_LPS_WITH_MECHANICAL_VENTILATION				DAUER_STAT3_TARGETS_DN			MARKEY_RB1_ACUTE_LOF_DN		ONDER_CDH1_TARGETS_2_DN							GRAESSMANN_RESPONSE_TO_MC_AND_SERUM_DEPRIVATION_UP														GRAESSMANN_APOPTOSIS_BY_SERUM_DEPRIVATION_UP
57674	RNF213	ring finger protein 213		FULCHER_INFLAMMATORY_RESPONSE_LECTIN_VS_LPS_DN		SANA_RESPONSE_TO_IFNG_UP		TAKEDA_TARGETS_OF_NUP98_HOXA9_FUSION_3D_UP						TAKEDA_TARGETS_OF_NUP98_HOXA9_FUSION_8D_UP			NUYTTEN_NIPP1_TARGETS_UP
10791	VAMP5	vesicle-associated membrane protein 5 (myobrevin)		FULCHER_INFLAMMATORY_RESPONSE_LECTIN_VS_LPS_DN		SANA_RESPONSE_TO_IFNG_UP			JISON_SICKLE_CELL_DISEASE_UP																						FEVR_CTNNB1_TARGETS_UP
10410	IFITM3	interferon induced transmembrane protein 3		FULCHER_INFLAMMATORY_RESPONSE_LECTIN_VS_LPS_DN			BOSCO_INTERFERON_INDUCED_ANTIVIRAL_MODULE			BENNETT_SYSTEMIC_LUPUS_ERYTHEMATOSUS					REACTOME_IMMUNE_SYSTEM	REACTOME_INTERFERON_SIGNALING		WALLACE_PROSTATE_CANCER_RACE_UP		RADAEVA_RESPONSE_TO_IFNA1_UP		REACTOME_INTERFERON_ALPHA_BETA_SIGNALING		REACTOME_CYTOKINE_SIGNALING_IN_IMMUNE_SYSTEM			DEBIASI_APOPTOSIS_BY_REOVIRUS_INFECTION_UP						ZHANG_INTERFERON_RESPONSE
8519	IFITM1	interferon induced transmembrane protein 1 (9-27)		FULCHER_INFLAMMATORY_RESPONSE_LECTIN_VS_LPS_DN				TAKEDA_TARGETS_OF_NUP98_HOXA9_FUSION_3D_UP			MOSERLE_IFNA_RESPONSE	NUYTTEN_EZH2_TARGETS_UP	TAKEDA_TARGETS_OF_NUP98_HOXA9_FUSION_10D_UP	TAKEDA_TARGETS_OF_NUP98_HOXA9_FUSION_8D_UP	REACTOME_IMMUNE_SYSTEM	REACTOME_INTERFERON_SIGNALING	NUYTTEN_NIPP1_TARGETS_UP	WALLACE_PROSTATE_CANCER_RACE_UP		RADAEVA_RESPONSE_TO_IFNA1_UP	TAKEDA_TARGETS_OF_NUP98_HOXA9_FUSION_16D_UP	REACTOME_INTERFERON_ALPHA_BETA_SIGNALING	DAUER_STAT3_TARGETS_DN	REACTOME_CYTOKINE_SIGNALING_IN_IMMUNE_SYSTEM			DEBIASI_APOPTOSIS_BY_REOVIRUS_INFECTION_UP						ZHANG_INTERFERON_RESPONSE	BOWIE_RESPONSE_TO_TAMOXIFEN			DER_IFN_ALPHA_RESPONSE_UP	KRASNOSELSKAYA_ILF3_TARGETS_UP	UROSEVIC_RESPONSE_TO_IMIQUIMOD	BOWIE_RESPONSE_TO_EXTRACELLULAR_MATRIX					DER_IFN_BETA_RESPONSE_UP
688	KLF5	Kruppel-like factor 5 (intestinal)		FULCHER_INFLAMMATORY_RESPONSE_LECTIN_VS_LPS_DN				TAKEDA_TARGETS_OF_NUP98_HOXA9_FUSION_3D_UP																				ONDER_CDH1_TARGETS_2_DN
8685	MARCO	macrophage receptor with collagenous structure		FULCHER_INFLAMMATORY_RESPONSE_LECTIN_VS_LPS_DN					JISON_SICKLE_CELL_DISEASE_UP																				ICHIBA_GRAFT_VERSUS_HOST_DISEASE_D7_UP												DELYS_THYROID_CANCER_UP
717	C2	complement component 2		FULCHER_INFLAMMATORY_RESPONSE_LECTIN_VS_LPS_DN						BENNETT_SYSTEMIC_LUPUS_ERYTHEMATOSUS					REACTOME_IMMUNE_SYSTEM											MARKEY_RB1_ACUTE_LOF_DN					FEVR_CTNNB1_TARGETS_UP										DELYS_THYROID_CANCER_UP
9447	AIM2	absent in melanoma 2		FULCHER_INFLAMMATORY_RESPONSE_LECTIN_VS_LPS_DN								NUYTTEN_EZH2_TARGETS_UP			REACTOME_IMMUNE_SYSTEM																												CHEN_METABOLIC_SYNDROM_NETWORK
54464	XRN1	5'-3' exoribonuclease 1		FULCHER_INFLAMMATORY_RESPONSE_LECTIN_VS_LPS_DN								NUYTTEN_EZH2_TARGETS_UP					NUYTTEN_NIPP1_TARGETS_UP
6398	SECTM1	secreted and transmembrane 1		FULCHER_INFLAMMATORY_RESPONSE_LECTIN_VS_LPS_DN								NUYTTEN_EZH2_TARGETS_UP						WALLACE_PROSTATE_CANCER_RACE_UP																					UROSEVIC_RESPONSE_TO_IMIQUIMOD									JAATINEN_HEMATOPOIETIC_STEM_CELL_DN
2621	GAS6	growth arrest-specific 6		FULCHER_INFLAMMATORY_RESPONSE_LECTIN_VS_LPS_DN								NUYTTEN_EZH2_TARGETS_UP																		NABA_MATRISOME
9021	SOCS3	suppressor of cytokine signaling 3		FULCHER_INFLAMMATORY_RESPONSE_LECTIN_VS_LPS_DN											REACTOME_IMMUNE_SYSTEM	REACTOME_INTERFERON_SIGNALING			ALTEMEIER_RESPONSE_TO_LPS_WITH_MECHANICAL_VENTILATION			REACTOME_INTERFERON_ALPHA_BETA_SIGNALING		REACTOME_CYTOKINE_SIGNALING_IN_IMMUNE_SYSTEM	REACTOME_INTERFERON_GAMMA_SIGNALING	MARKEY_RB1_ACUTE_LOF_DN					FEVR_CTNNB1_TARGETS_UP
118788	PIK3AP1	phosphoinositide-3-kinase adaptor protein 1		FULCHER_INFLAMMATORY_RESPONSE_LECTIN_VS_LPS_DN											REACTOME_IMMUNE_SYSTEM																												CHEN_METABOLIC_SYNDROM_NETWORK
23034	SAMD4A	sterile alpha motif domain containing 4A		FULCHER_INFLAMMATORY_RESPONSE_LECTIN_VS_LPS_DN													NUYTTEN_NIPP1_TARGETS_UP																								DELYS_THYROID_CANCER_UP						SCHUETZ_BREAST_CANCER_DUCTAL_INVASIVE_UP
1824	DSC2	desmocollin 2		FULCHER_INFLAMMATORY_RESPONSE_LECTIN_VS_LPS_DN																								ONDER_CDH1_TARGETS_2_DN													DELYS_THYROID_CANCER_UP
3985	LIMK2	LIM domain kinase 2		FULCHER_INFLAMMATORY_RESPONSE_LECTIN_VS_LPS_DN																								ONDER_CDH1_TARGETS_2_DN
79651	RHBDF2	rhomboid 5 homolog 2 (Drosophila)		FULCHER_INFLAMMATORY_RESPONSE_LECTIN_VS_LPS_DN																								ONDER_CDH1_TARGETS_2_DN
54757	FAM20A	family with sequence similarity 20, member A		FULCHER_INFLAMMATORY_RESPONSE_LECTIN_VS_LPS_DN																										NABA_MATRISOME														NABA_MATRISOME_ASSOCIATED
56994	CHPT1	choline phosphotransferase 1		FULCHER_INFLAMMATORY_RESPONSE_LECTIN_VS_LPS_DN																												RUTELLA_RESPONSE_TO_HGF_VS_CSF2RB_AND_IL4_UP
6272	SORT1	sortilin 1		FULCHER_INFLAMMATORY_RESPONSE_LECTIN_VS_LPS_DN																																							CHEN_METABOLIC_SYNDROM_NETWORK
8291	DYSF	dysferlin, limb girdle muscular dystrophy 2B (autosomal recessive)		FULCHER_INFLAMMATORY_RESPONSE_LECTIN_VS_LPS_DN																																							CHEN_METABOLIC_SYNDROM_NETWORK
2215	FCGR3B	Fc fragment of IgG, low affinity IIIb, receptor (CD16b)		FULCHER_INFLAMMATORY_RESPONSE_LECTIN_VS_LPS_DN																																											SCHUETZ_BREAST_CANCER_DUCTAL_INVASIVE_UP	JAATINEN_HEMATOPOIETIC_STEM_CELL_DN
441168	FAM26F	family with sequence similarity 26, member F		FULCHER_INFLAMMATORY_RESPONSE_LECTIN_VS_LPS_DN
56670	SUCNR1	succinate receptor 1		FULCHER_INFLAMMATORY_RESPONSE_LECTIN_VS_LPS_DN
4299	AFF1	AF4/FMR2 family, member 1		FULCHER_INFLAMMATORY_RESPONSE_LECTIN_VS_LPS_DN
200942	KLHDC8B	kelch domain containing 8B		FULCHER_INFLAMMATORY_RESPONSE_LECTIN_VS_LPS_DN
7453	WARS	tryptophanyl-tRNA synthetase			BROWNE_INTERFERON_RESPONSIVE_GENES	SANA_RESPONSE_TO_IFNG_UP						NUYTTEN_EZH2_TARGETS_UP																	ICHIBA_GRAFT_VERSUS_HOST_DISEASE_D7_UP												DELYS_THYROID_CANCER_UP	ICHIBA_GRAFT_VERSUS_HOST_DISEASE_35D_UP
5371	PML	promyelocytic leukemia			BROWNE_INTERFERON_RESPONSIVE_GENES		BOSCO_INTERFERON_INDUCED_ANTIVIRAL_MODULE					NUYTTEN_EZH2_TARGETS_UP			REACTOME_IMMUNE_SYSTEM	REACTOME_INTERFERON_SIGNALING	NUYTTEN_NIPP1_TARGETS_UP							REACTOME_CYTOKINE_SIGNALING_IN_IMMUNE_SYSTEM	REACTOME_INTERFERON_GAMMA_SIGNALING		DEBIASI_APOPTOSIS_BY_REOVIRUS_INFECTION_UP										DER_IFN_ALPHA_RESPONSE_UP
6890	TAP1	transporter 1, ATP-binding cassette, sub-family B (MDR/TAP)			BROWNE_INTERFERON_RESPONSIVE_GENES				JISON_SICKLE_CELL_DISEASE_UP	BENNETT_SYSTEMIC_LUPUS_ERYTHEMATOSUS		NUYTTEN_EZH2_TARGETS_UP			REACTOME_IMMUNE_SYSTEM		NUYTTEN_NIPP1_TARGETS_UP	WALLACE_PROSTATE_CANCER_RACE_UP								MARKEY_RB1_ACUTE_LOF_DN	DEBIASI_APOPTOSIS_BY_REOVIRUS_INFECTION_UP		ICHIBA_GRAFT_VERSUS_HOST_DISEASE_D7_UP		FEVR_CTNNB1_TARGETS_UP					YANG_BCL3_TARGETS_UP	DER_IFN_ALPHA_RESPONSE_UP	KRASNOSELSKAYA_ILF3_TARGETS_UP				ICHIBA_GRAFT_VERSUS_HOST_DISEASE_35D_UP			DER_IFN_BETA_RESPONSE_UP
5698	PSMB9	proteasome (prosome, macropain) subunit, beta type, 9 (large multifunctional peptidase 2)			BROWNE_INTERFERON_RESPONSIVE_GENES				JISON_SICKLE_CELL_DISEASE_UP			NUYTTEN_EZH2_TARGETS_UP			REACTOME_IMMUNE_SYSTEM			WALLACE_PROSTATE_CANCER_RACE_UP								MARKEY_RB1_ACUTE_LOF_DN	DEBIASI_APOPTOSIS_BY_REOVIRUS_INFECTION_UP		ICHIBA_GRAFT_VERSUS_HOST_DISEASE_D7_UP							YANG_BCL3_TARGETS_UP	DER_IFN_ALPHA_RESPONSE_UP	KRASNOSELSKAYA_ILF3_TARGETS_UP		BOWIE_RESPONSE_TO_EXTRACELLULAR_MATRIX		ICHIBA_GRAFT_VERSUS_HOST_DISEASE_35D_UP			DER_IFN_BETA_RESPONSE_UP		SCHUETZ_BREAST_CANCER_DUCTAL_INVASIVE_UP
3600	IL15	interleukin 15			BROWNE_INTERFERON_RESPONSIVE_GENES				JISON_SICKLE_CELL_DISEASE_UP				TAKEDA_TARGETS_OF_NUP98_HOXA9_FUSION_10D_UP				NUYTTEN_NIPP1_TARGETS_UP	WALLACE_PROSTATE_CANCER_RACE_UP	ALTEMEIER_RESPONSE_TO_LPS_WITH_MECHANICAL_VENTILATION											NABA_MATRISOME	FEVR_CTNNB1_TARGETS_UP													NABA_MATRISOME_ASSOCIATED
8676	STX11	syntaxin 11			BROWNE_INTERFERON_RESPONSIVE_GENES																																											JAATINEN_HEMATOPOIETIC_STEM_CELL_DN
29126	CD274	CD274 molecule				SANA_RESPONSE_TO_IFNG_UP	BOSCO_INTERFERON_INDUCED_ANTIVIRAL_MODULE				MOSERLE_IFNA_RESPONSE				REACTOME_IMMUNE_SYSTEM																												CHEN_METABOLIC_SYNDROM_NETWORK
115361	GBP4	guanylate binding protein 4				SANA_RESPONSE_TO_IFNG_UP	BOSCO_INTERFERON_INDUCED_ANTIVIRAL_MODULE					NUYTTEN_EZH2_TARGETS_UP			REACTOME_IMMUNE_SYSTEM	REACTOME_INTERFERON_SIGNALING			ALTEMEIER_RESPONSE_TO_LPS_WITH_MECHANICAL_VENTILATION					REACTOME_CYTOKINE_SIGNALING_IN_IMMUNE_SYSTEM	REACTOME_INTERFERON_GAMMA_SIGNALING	MARKEY_RB1_ACUTE_LOF_DN			ICHIBA_GRAFT_VERSUS_HOST_DISEASE_D7_UP							YANG_BCL3_TARGETS_UP						ICHIBA_GRAFT_VERSUS_HOST_DISEASE_35D_UP
8542	APOL1	apolipoprotein L, 1				SANA_RESPONSE_TO_IFNG_UP	BOSCO_INTERFERON_INDUCED_ANTIVIRAL_MODULE											WALLACE_PROSTATE_CANCER_RACE_UP
54625	PARP14	poly (ADP-ribose) polymerase family, member 14				SANA_RESPONSE_TO_IFNG_UP		TAKEDA_TARGETS_OF_NUP98_HOXA9_FUSION_3D_UP				NUYTTEN_EZH2_TARGETS_UP					NUYTTEN_NIPP1_TARGETS_UP																		GRAESSMANN_RESPONSE_TO_MC_AND_SERUM_DEPRIVATION_UP	YANG_BCL3_TARGETS_UP
2635	GBP3	guanylate binding protein 3				SANA_RESPONSE_TO_IFNG_UP		TAKEDA_TARGETS_OF_NUP98_HOXA9_FUSION_3D_UP				NUYTTEN_EZH2_TARGETS_UP					NUYTTEN_NIPP1_TARGETS_UP
116071	BATF2	basic leucine zipper transcription factor, ATF-like 2				SANA_RESPONSE_TO_IFNG_UP						NUYTTEN_EZH2_TARGETS_UP					NUYTTEN_NIPP1_TARGETS_UP																										CHEN_METABOLIC_SYNDROM_NETWORK
23780	APOL2	apolipoprotein L, 2				SANA_RESPONSE_TO_IFNG_UP						NUYTTEN_EZH2_TARGETS_UP					NUYTTEN_NIPP1_TARGETS_UP
634	CEACAM1	carcinoembryonic antigen-related cell adhesion molecule 1 (biliary glycoprotein)				SANA_RESPONSE_TO_IFNG_UP						NUYTTEN_EZH2_TARGETS_UP																ONDER_CDH1_TARGETS_2_DN
5414	2018-09-04	septin 4				SANA_RESPONSE_TO_IFNG_UP																														YANG_BCL3_TARGETS_UP
51513	ETV7	ets variant 7				SANA_RESPONSE_TO_IFNG_UP
80832	APOL4	apolipoprotein L, 4				SANA_RESPONSE_TO_IFNG_UP
6773	STAT2	signal transducer and activator of transcription 2, 113kDa					BOSCO_INTERFERON_INDUCED_ANTIVIRAL_MODULE	TAKEDA_TARGETS_OF_NUP98_HOXA9_FUSION_3D_UP				NUYTTEN_EZH2_TARGETS_UP			REACTOME_IMMUNE_SYSTEM	REACTOME_INTERFERON_SIGNALING	NUYTTEN_NIPP1_TARGETS_UP		ALTEMEIER_RESPONSE_TO_LPS_WITH_MECHANICAL_VENTILATION			REACTOME_INTERFERON_ALPHA_BETA_SIGNALING		REACTOME_CYTOKINE_SIGNALING_IN_IMMUNE_SYSTEM							FEVR_CTNNB1_TARGETS_UP					YANG_BCL3_TARGETS_UP													GRAESSMANN_APOPTOSIS_BY_SERUM_DEPRIVATION_UP
80830	APOL6	apolipoprotein L, 6					BOSCO_INTERFERON_INDUCED_ANTIVIRAL_MODULE					NUYTTEN_EZH2_TARGETS_UP	TAKEDA_TARGETS_OF_NUP98_HOXA9_FUSION_10D_UP					WALLACE_PROSTATE_CANCER_RACE_UP
9934	P2RY14	purinergic receptor P2Y, G-protein coupled, 14					BOSCO_INTERFERON_INDUCED_ANTIVIRAL_MODULE											WALLACE_PROSTATE_CANCER_RACE_UP																									CHEN_METABOLIC_SYNDROM_NETWORK				SCHUETZ_BREAST_CANCER_DUCTAL_INVASIVE_UP
9672	SDC3	syndecan 3					BOSCO_INTERFERON_INDUCED_ANTIVIRAL_MODULE																							NABA_MATRISOME														NABA_MATRISOME_ASSOCIATED
4343	MOV10	Mov10, Moloney leukemia virus 10, homolog (mouse)					BOSCO_INTERFERON_INDUCED_ANTIVIRAL_MODULE																													YANG_BCL3_TARGETS_UP
91351	DDX60L	DEAD (Asp-Glu-Ala-Asp) box polypeptide 60-like						TAKEDA_TARGETS_OF_NUP98_HOXA9_FUSION_3D_UP			MOSERLE_IFNA_RESPONSE	NUYTTEN_EZH2_TARGETS_UP	TAKEDA_TARGETS_OF_NUP98_HOXA9_FUSION_10D_UP				NUYTTEN_NIPP1_TARGETS_UP
9053	MAP7	microtubule-associated protein 7						TAKEDA_TARGETS_OF_NUP98_HOXA9_FUSION_3D_UP						TAKEDA_TARGETS_OF_NUP98_HOXA9_FUSION_8D_UP														ONDER_CDH1_TARGETS_2_DN
10321	CRISP3	cysteine-rich secretory protein 3						TAKEDA_TARGETS_OF_NUP98_HOXA9_FUSION_3D_UP						TAKEDA_TARGETS_OF_NUP98_HOXA9_FUSION_8D_UP
2335	FN1	fibronectin 1							JISON_SICKLE_CELL_DISEASE_UP			NUYTTEN_EZH2_TARGETS_UP	TAKEDA_TARGETS_OF_NUP98_HOXA9_FUSION_10D_UP								TAKEDA_TARGETS_OF_NUP98_HOXA9_FUSION_16D_UP									NABA_MATRISOME	FEVR_CTNNB1_TARGETS_UP										DELYS_THYROID_CANCER_UP						SCHUETZ_BREAST_CANCER_DUCTAL_INVASIVE_UP
3717	JAK2	Janus kinase 2							JISON_SICKLE_CELL_DISEASE_UP			NUYTTEN_EZH2_TARGETS_UP			REACTOME_IMMUNE_SYSTEM	REACTOME_INTERFERON_SIGNALING								REACTOME_CYTOKINE_SIGNALING_IN_IMMUNE_SYSTEM	REACTOME_INTERFERON_GAMMA_SIGNALING						FEVR_CTNNB1_TARGETS_UP
467	ATF3	activating transcription factor 3							JISON_SICKLE_CELL_DISEASE_UP			NUYTTEN_EZH2_TARGETS_UP					NUYTTEN_NIPP1_TARGETS_UP		ALTEMEIER_RESPONSE_TO_LPS_WITH_MECHANICAL_VENTILATION								DEBIASI_APOPTOSIS_BY_REOVIRUS_INFECTION_UP				FEVR_CTNNB1_TARGETS_UP												CHEN_METABOLIC_SYNDROM_NETWORK
133	ADM	adrenomedullin							JISON_SICKLE_CELL_DISEASE_UP			NUYTTEN_EZH2_TARGETS_UP							ALTEMEIER_RESPONSE_TO_LPS_WITH_MECHANICAL_VENTILATION								DEBIASI_APOPTOSIS_BY_REOVIRUS_INFECTION_UP				FEVR_CTNNB1_TARGETS_UP										DELYS_THYROID_CANCER_UP
2209	FCGR1A	Fc fragment of IgG, high affinity Ia, receptor (CD64)							JISON_SICKLE_CELL_DISEASE_UP						REACTOME_IMMUNE_SYSTEM	REACTOME_INTERFERON_SIGNALING			ALTEMEIER_RESPONSE_TO_LPS_WITH_MECHANICAL_VENTILATION					REACTOME_CYTOKINE_SIGNALING_IN_IMMUNE_SYSTEM	REACTOME_INTERFERON_GAMMA_SIGNALING	MARKEY_RB1_ACUTE_LOF_DN																ICHIBA_GRAFT_VERSUS_HOST_DISEASE_35D_UP	CHEN_METABOLIC_SYNDROM_NETWORK
10184	LHFPL2	lipoma HMGIC fusion partner-like 2							JISON_SICKLE_CELL_DISEASE_UP								NUYTTEN_NIPP1_TARGETS_UP															RUTELLA_RESPONSE_TO_HGF_VS_CSF2RB_AND_IL4_UP
85236	HIST1H2BK	histone cluster 1, H2bk							JISON_SICKLE_CELL_DISEASE_UP								NUYTTEN_NIPP1_TARGETS_UP
22797	TFEC	transcription factor EC							JISON_SICKLE_CELL_DISEASE_UP									WALLACE_PROSTATE_CANCER_RACE_UP	ALTEMEIER_RESPONSE_TO_LPS_WITH_MECHANICAL_VENTILATION																								CHEN_METABOLIC_SYNDROM_NETWORK				SCHUETZ_BREAST_CANCER_DUCTAL_INVASIVE_UP
306	ANXA3	annexin A3							JISON_SICKLE_CELL_DISEASE_UP																			ONDER_CDH1_TARGETS_2_DN		NABA_MATRISOME													CHEN_METABOLIC_SYNDROM_NETWORK	NABA_MATRISOME_ASSOCIATED
2760	GM2A	GM2 ganglioside activator							JISON_SICKLE_CELL_DISEASE_UP																			ONDER_CDH1_TARGETS_2_DN				RUTELLA_RESPONSE_TO_HGF_VS_CSF2RB_AND_IL4_UP
1991	ELANE	elastase, neutrophil expressed							JISON_SICKLE_CELL_DISEASE_UP																					NABA_MATRISOME	FEVR_CTNNB1_TARGETS_UP													NABA_MATRISOME_ASSOCIATED		MARTINELLI_IMMATURE_NEUTROPHIL_UP
7504	XK	X-linked Kx blood group (McLeod syndrome)							JISON_SICKLE_CELL_DISEASE_UP																											YANG_BCL3_TARGETS_UP												JAATINEN_HEMATOPOIETIC_STEM_CELL_DN
566	AZU1	azurocidin 1							JISON_SICKLE_CELL_DISEASE_UP																																					MARTINELLI_IMMATURE_NEUTROPHIL_UP
4353	MPO	myeloperoxidase							JISON_SICKLE_CELL_DISEASE_UP																																					MARTINELLI_IMMATURE_NEUTROPHIL_UP
10643	IGF2BP3	insulin-like growth factor 2 mRNA binding protein 3							JISON_SICKLE_CELL_DISEASE_UP
6948	TCN2	transcobalamin II							JISON_SICKLE_CELL_DISEASE_UP
1667	DEFA1	defensin, alpha 1								BENNETT_SYSTEMIC_LUPUS_ERYTHEMATOSUS					REACTOME_IMMUNE_SYSTEM																															MARTINELLI_IMMATURE_NEUTROPHIL_UP
1668	DEFA3	defensin, alpha 3, neutrophil-specific								BENNETT_SYSTEMIC_LUPUS_ERYTHEMATOSUS					REACTOME_IMMUNE_SYSTEM
6279	S100A8	S100 calcium binding protein A8								BENNETT_SYSTEMIC_LUPUS_ERYTHEMATOSUS																		ONDER_CDH1_TARGETS_2_DN		NABA_MATRISOME												ICHIBA_GRAFT_VERSUS_HOST_DISEASE_35D_UP	CHEN_METABOLIC_SYNDROM_NETWORK	NABA_MATRISOME_ASSOCIATED				JAATINEN_HEMATOPOIETIC_STEM_CELL_DN
820	CAMP	cathelicidin antimicrobial peptide								BENNETT_SYSTEMIC_LUPUS_ERYTHEMATOSUS																																ICHIBA_GRAFT_VERSUS_HOST_DISEASE_35D_UP				MARTINELLI_IMMATURE_NEUTROPHIL_UP
10170	DHRS9	dehydrogenase/reductase (SDR family) member 9										NUYTTEN_EZH2_TARGETS_UP	TAKEDA_TARGETS_OF_NUP98_HOXA9_FUSION_10D_UP
9241	NOG	noggin										NUYTTEN_EZH2_TARGETS_UP		TAKEDA_TARGETS_OF_NUP98_HOXA9_FUSION_8D_UP
4502	MT2A	metallothionein 2A										NUYTTEN_EZH2_TARGETS_UP			REACTOME_IMMUNE_SYSTEM	REACTOME_INTERFERON_SIGNALING	NUYTTEN_NIPP1_TARGETS_UP		ALTEMEIER_RESPONSE_TO_LPS_WITH_MECHANICAL_VENTILATION					REACTOME_CYTOKINE_SIGNALING_IN_IMMUNE_SYSTEM	REACTOME_INTERFERON_GAMMA_SIGNALING	MARKEY_RB1_ACUTE_LOF_DN					FEVR_CTNNB1_TARGETS_UP	RUTELLA_RESPONSE_TO_HGF_VS_CSF2RB_AND_IL4_UP										ICHIBA_GRAFT_VERSUS_HOST_DISEASE_35D_UP
115362	GBP5	guanylate binding protein 5										NUYTTEN_EZH2_TARGETS_UP			REACTOME_IMMUNE_SYSTEM	REACTOME_INTERFERON_SIGNALING	NUYTTEN_NIPP1_TARGETS_UP							REACTOME_CYTOKINE_SIGNALING_IN_IMMUNE_SYSTEM	REACTOME_INTERFERON_GAMMA_SIGNALING
3659	IRF1	interferon regulatory factor 1										NUYTTEN_EZH2_TARGETS_UP			REACTOME_IMMUNE_SYSTEM	REACTOME_INTERFERON_SIGNALING		WALLACE_PROSTATE_CANCER_RACE_UP		RADAEVA_RESPONSE_TO_IFNA1_UP		REACTOME_INTERFERON_ALPHA_BETA_SIGNALING		REACTOME_CYTOKINE_SIGNALING_IN_IMMUNE_SYSTEM	REACTOME_INTERFERON_GAMMA_SIGNALING				ICHIBA_GRAFT_VERSUS_HOST_DISEASE_D7_UP		FEVR_CTNNB1_TARGETS_UP		ZHANG_INTERFERON_RESPONSE	BOWIE_RESPONSE_TO_TAMOXIFEN	GRAESSMANN_RESPONSE_TO_MC_AND_SERUM_DEPRIVATION_UP		DER_IFN_ALPHA_RESPONSE_UP			BOWIE_RESPONSE_TO_EXTRACELLULAR_MATRIX					DER_IFN_BETA_RESPONSE_UP				GRAESSMANN_APOPTOSIS_BY_SERUM_DEPRIVATION_UP
8651	SOCS1	suppressor of cytokine signaling 1										NUYTTEN_EZH2_TARGETS_UP			REACTOME_IMMUNE_SYSTEM	REACTOME_INTERFERON_SIGNALING		WALLACE_PROSTATE_CANCER_RACE_UP		RADAEVA_RESPONSE_TO_IFNA1_UP		REACTOME_INTERFERON_ALPHA_BETA_SIGNALING		REACTOME_CYTOKINE_SIGNALING_IN_IMMUNE_SYSTEM	REACTOME_INTERFERON_GAMMA_SIGNALING				ICHIBA_GRAFT_VERSUS_HOST_DISEASE_D7_UP						GRAESSMANN_RESPONSE_TO_MC_AND_SERUM_DEPRIVATION_UP														GRAESSMANN_APOPTOSIS_BY_SERUM_DEPRIVATION_UP
1845	DUSP3	dual specificity phosphatase 3										NUYTTEN_EZH2_TARGETS_UP			REACTOME_IMMUNE_SYSTEM												DEBIASI_APOPTOSIS_BY_REOVIRUS_INFECTION_UP
7052	TGM2	transglutaminase 2 (C polypeptide, protein-glutamine-gamma-glutamyltransferase)										NUYTTEN_EZH2_TARGETS_UP					NUYTTEN_NIPP1_TARGETS_UP													NABA_MATRISOME		RUTELLA_RESPONSE_TO_HGF_VS_CSF2RB_AND_IL4_UP									DELYS_THYROID_CANCER_UP			NABA_MATRISOME_ASSOCIATED			SCHUETZ_BREAST_CANCER_DUCTAL_INVASIVE_UP
26010	SPATS2L	spermatogenesis associated, serine-rich 2-like										NUYTTEN_EZH2_TARGETS_UP					NUYTTEN_NIPP1_TARGETS_UP														FEVR_CTNNB1_TARGETS_UP												CHEN_METABOLIC_SYNDROM_NETWORK
3984	LIMK1	LIM domain kinase 1										NUYTTEN_EZH2_TARGETS_UP					NUYTTEN_NIPP1_TARGETS_UP
117854	TRIM6	tripartite motif containing 6										NUYTTEN_EZH2_TARGETS_UP					NUYTTEN_NIPP1_TARGETS_UP
8739	HRK	harakiri, BCL2 interacting protein (contains only BH3 domain)										NUYTTEN_EZH2_TARGETS_UP															DEBIASI_APOPTOSIS_BY_REOVIRUS_INFECTION_UP
1534	CYB561	cytochrome b-561										NUYTTEN_EZH2_TARGETS_UP																ONDER_CDH1_TARGETS_2_DN														ICHIBA_GRAFT_VERSUS_HOST_DISEASE_35D_UP
7855	FZD5	frizzled family receptor 5										NUYTTEN_EZH2_TARGETS_UP																ONDER_CDH1_TARGETS_2_DN															CHEN_METABOLIC_SYNDROM_NETWORK
55640	FLVCR2	feline leukemia virus subgroup C cellular receptor family, member 2										NUYTTEN_EZH2_TARGETS_UP																			FEVR_CTNNB1_TARGETS_UP										DELYS_THYROID_CANCER_UP
154664	ABCA13	ATP-binding cassette, sub-family A (ABC1), member 13										NUYTTEN_EZH2_TARGETS_UP
26499	PLEK2	pleckstrin 2										NUYTTEN_EZH2_TARGETS_UP
57590	WDFY1	WD repeat and FYVE domain containing 1										NUYTTEN_EZH2_TARGETS_UP
3045	HBD	hemoglobin, delta											TAKEDA_TARGETS_OF_NUP98_HOXA9_FUSION_10D_UP	TAKEDA_TARGETS_OF_NUP98_HOXA9_FUSION_8D_UP							TAKEDA_TARGETS_OF_NUP98_HOXA9_FUSION_16D_UP																											JAATINEN_HEMATOPOIETIC_STEM_CELL_DN
196410	METTL7B	methyltransferase like 7B											TAKEDA_TARGETS_OF_NUP98_HOXA9_FUSION_10D_UP	TAKEDA_TARGETS_OF_NUP98_HOXA9_FUSION_8D_UP							TAKEDA_TARGETS_OF_NUP98_HOXA9_FUSION_16D_UP
2210	FCGR1B	Fc fragment of IgG, high affinity Ib, receptor (CD64)													REACTOME_IMMUNE_SYSTEM	REACTOME_INTERFERON_SIGNALING								REACTOME_CYTOKINE_SIGNALING_IN_IMMUNE_SYSTEM	REACTOME_INTERFERON_GAMMA_SIGNALING																						SCHUETZ_BREAST_CANCER_DUCTAL_INVASIVE_UP
163351	GBP6	guanylate binding protein family, member 6													REACTOME_IMMUNE_SYSTEM	REACTOME_INTERFERON_SIGNALING								REACTOME_CYTOKINE_SIGNALING_IN_IMMUNE_SYSTEM	REACTOME_INTERFERON_GAMMA_SIGNALING
6891	TAP2	transporter 2, ATP-binding cassette, sub-family B (MDR/TAP)													REACTOME_IMMUNE_SYSTEM			WALLACE_PROSTATE_CANCER_RACE_UP											ICHIBA_GRAFT_VERSUS_HOST_DISEASE_D7_UP		FEVR_CTNNB1_TARGETS_UP				GRAESSMANN_RESPONSE_TO_MC_AND_SERUM_DEPRIVATION_UP														GRAESSMANN_APOPTOSIS_BY_SERUM_DEPRIVATION_UP
6283	S100A12	S100 calcium binding protein A12													REACTOME_IMMUNE_SYSTEM															NABA_MATRISOME		RUTELLA_RESPONSE_TO_HGF_VS_CSF2RB_AND_IL4_UP												NABA_MATRISOME_ASSOCIATED				JAATINEN_HEMATOPOIETIC_STEM_CELL_DN
6285	S100B	S100 calcium binding protein B													REACTOME_IMMUNE_SYSTEM															NABA_MATRISOME											DELYS_THYROID_CANCER_UP			NABA_MATRISOME_ASSOCIATED
11006	LILRB4	leukocyte immunoglobulin-like receptor, subfamily B (with TM and ITIM domains), member 4													REACTOME_IMMUNE_SYSTEM																	RUTELLA_RESPONSE_TO_HGF_VS_CSF2RB_AND_IL4_UP
1669	DEFA4	defensin, alpha 4, corticostatin													REACTOME_IMMUNE_SYSTEM																															MARTINELLI_IMMATURE_NEUTROPHIL_UP
5909	RAP1GAP	RAP1 GTPase activating protein													REACTOME_IMMUNE_SYSTEM
7100	TLR5	toll-like receptor 5													REACTOME_IMMUNE_SYSTEM
26270	FBXO6	F-box protein 6													REACTOME_IMMUNE_SYSTEM
147700	KLC3	kinesin light chain 3													REACTOME_IMMUNE_SYSTEM
80380	PDCD1LG2	programmed cell death 1 ligand 2													REACTOME_IMMUNE_SYSTEM
3812	KIR3DL2	killer cell immunoglobulin-like receptor, three domains, long cytoplasmic tail, 2													REACTOME_IMMUNE_SYSTEM
2947	GSTM3	glutathione S-transferase mu 3 (brain)															NUYTTEN_NIPP1_TARGETS_UP	WALLACE_PROSTATE_CANCER_RACE_UP
26289	AK5	adenylate kinase 5															NUYTTEN_NIPP1_TARGETS_UP
6006	RHCE	Rh blood group, CcEe antigens															NUYTTEN_NIPP1_TARGETS_UP
838	CASP5	caspase 5, apoptosis-related cysteine peptidase															NUYTTEN_NIPP1_TARGETS_UP
10912	GADD45G	growth arrest and DNA-damage-inducible, gamma																WALLACE_PROSTATE_CANCER_RACE_UP	ALTEMEIER_RESPONSE_TO_LPS_WITH_MECHANICAL_VENTILATION												FEVR_CTNNB1_TARGETS_UP	RUTELLA_RESPONSE_TO_HGF_VS_CSF2RB_AND_IL4_UP
1844	DUSP2	dual specificity phosphatase 2																WALLACE_PROSTATE_CANCER_RACE_UP
338339	CLEC4D	C-type lectin domain family 4, member D																	ALTEMEIER_RESPONSE_TO_LPS_WITH_MECHANICAL_VENTILATION		TAKEDA_TARGETS_OF_NUP98_HOXA9_FUSION_16D_UP					MARKEY_RB1_ACUTE_LOF_DN				NABA_MATRISOME													CHEN_METABOLIC_SYNDROM_NETWORK	NABA_MATRISOME_ASSOCIATED
93978	CLEC6A	C-type lectin domain family 6, member A																	ALTEMEIER_RESPONSE_TO_LPS_WITH_MECHANICAL_VENTILATION											NABA_MATRISOME														NABA_MATRISOME_ASSOCIATED
55647	RAB20	RAB20, member RAS oncogene family																	ALTEMEIER_RESPONSE_TO_LPS_WITH_MECHANICAL_VENTILATION												FEVR_CTNNB1_TARGETS_UP	RUTELLA_RESPONSE_TO_HGF_VS_CSF2RB_AND_IL4_UP
2710	GK	glycerol kinase																	ALTEMEIER_RESPONSE_TO_LPS_WITH_MECHANICAL_VENTILATION												FEVR_CTNNB1_TARGETS_UP
92610	TIFA	TRAF-interacting protein with forkhead-associated domain																	ALTEMEIER_RESPONSE_TO_LPS_WITH_MECHANICAL_VENTILATION																														GRAESSMANN_APOPTOSIS_BY_SERUM_DEPRIVATION_UP
53831	GPR84	G protein-coupled receptor 84																	ALTEMEIER_RESPONSE_TO_LPS_WITH_MECHANICAL_VENTILATION
28517	TRDV2	T cell receptor delta variable 2																			TAKEDA_TARGETS_OF_NUP98_HOXA9_FUSION_16D_UP																										SCHUETZ_BREAST_CANCER_DUCTAL_INVASIVE_UP	JAATINEN_HEMATOPOIETIC_STEM_CELL_DN
118932	ANKRD22	ankyrin repeat domain 22																			TAKEDA_TARGETS_OF_NUP98_HOXA9_FUSION_16D_UP
57168	ASPHD2	aspartate beta-hydroxylase domain containing 2																			TAKEDA_TARGETS_OF_NUP98_HOXA9_FUSION_16D_UP
3679	ITGA7	integrin, alpha 7																			TAKEDA_TARGETS_OF_NUP98_HOXA9_FUSION_16D_UP
3240	HP	haptoglobin																								MARKEY_RB1_ACUTE_LOF_DN					FEVR_CTNNB1_TARGETS_UP					YANG_BCL3_TARGETS_UP					DELYS_THYROID_CANCER_UP
19	ABCA1	ATP-binding cassette, sub-family A (ABC1), member 1																								MARKEY_RB1_ACUTE_LOF_DN										YANG_BCL3_TARGETS_UP
205	AK4	adenylate kinase 4																								MARKEY_RB1_ACUTE_LOF_DN
4671	NAIP	NLR family, apoptosis inhibitory protein																									DEBIASI_APOPTOSIS_BY_REOVIRUS_INFECTION_UP				FEVR_CTNNB1_TARGETS_UP
346157	ZNF391	zinc finger protein 391																									DEBIASI_APOPTOSIS_BY_REOVIRUS_INFECTION_UP
8343	HIST1H2BF	histone cluster 1, H2bf																									DEBIASI_APOPTOSIS_BY_REOVIRUS_INFECTION_UP
6280	S100A9	S100 calcium binding protein A9																										ONDER_CDH1_TARGETS_2_DN		NABA_MATRISOME		RUTELLA_RESPONSE_TO_HGF_VS_CSF2RB_AND_IL4_UP										ICHIBA_GRAFT_VERSUS_HOST_DISEASE_35D_UP		NABA_MATRISOME_ASSOCIATED				JAATINEN_HEMATOPOIETIC_STEM_CELL_DN
6382	SDC1	syndecan 1																										ONDER_CDH1_TARGETS_2_DN		NABA_MATRISOME						YANG_BCL3_TARGETS_UP					DELYS_THYROID_CANCER_UP			NABA_MATRISOME_ASSOCIATED
1308	COL17A1	collagen, type XVII, alpha 1																										ONDER_CDH1_TARGETS_2_DN		NABA_MATRISOME
6535	SLC6A8	solute carrier family 6 (neurotransmitter transporter, creatine), member 8																										ONDER_CDH1_TARGETS_2_DN			FEVR_CTNNB1_TARGETS_UP												CHEN_METABOLIC_SYNDROM_NETWORK
9050	PSTPIP2	proline-serine-threonine phosphatase interacting protein 2																										ONDER_CDH1_TARGETS_2_DN			FEVR_CTNNB1_TARGETS_UP
55092	TMEM51	transmembrane protein 51																										ONDER_CDH1_TARGETS_2_DN				RUTELLA_RESPONSE_TO_HGF_VS_CSF2RB_AND_IL4_UP											CHEN_METABOLIC_SYNDROM_NETWORK
79365	BHLHE41	basic helix-loop-helix family, member e41																										ONDER_CDH1_TARGETS_2_DN				RUTELLA_RESPONSE_TO_HGF_VS_CSF2RB_AND_IL4_UP
3934	LCN2	lipocalin 2																										ONDER_CDH1_TARGETS_2_DN													DELYS_THYROID_CANCER_UP					MARTINELLI_IMMATURE_NEUTROPHIL_UP
4680	CEACAM6	carcinoembryonic antigen-related cell adhesion molecule 6 (non-specific cross reacting antigen)																										ONDER_CDH1_TARGETS_2_DN													DELYS_THYROID_CANCER_UP
6622	SNCA	synuclein, alpha (non A4 component of amyloid precursor)																										ONDER_CDH1_TARGETS_2_DN																				JAATINEN_HEMATOPOIETIC_STEM_CELL_DN
9957	HS3ST1	heparan sulfate (glucosamine) 3-O-sulfotransferase 1																										ONDER_CDH1_TARGETS_2_DN
64866	CDCP1	CUB domain containing protein 1																										ONDER_CDH1_TARGETS_2_DN
27065	D4S234E	DNA segment on chromosome 4 (unique) 234 expressed sequence																										ONDER_CDH1_TARGETS_2_DN
55966	AJAP1	adherens junctions associated protein 1																										ONDER_CDH1_TARGETS_2_DN
79056	PRRG4	proline rich Gla (G-carboxyglutamic acid) 4 (transmembrane)																										ONDER_CDH1_TARGETS_2_DN
4481	MSR1	macrophage scavenger receptor 1																											ICHIBA_GRAFT_VERSUS_HOST_DISEASE_D7_UP												DELYS_THYROID_CANCER_UP	ICHIBA_GRAFT_VERSUS_HOST_DISEASE_35D_UP	CHEN_METABOLIC_SYNDROM_NETWORK				SCHUETZ_BREAST_CANCER_DUCTAL_INVASIVE_UP
4582	MUC1	mucin 1, cell surface associated																												NABA_MATRISOME	FEVR_CTNNB1_TARGETS_UP										DELYS_THYROID_CANCER_UP			NABA_MATRISOME_ASSOCIATED
10673	TNFSF13B	tumor necrosis factor (ligand) superfamily, member 13b																												NABA_MATRISOME	FEVR_CTNNB1_TARGETS_UP												CHEN_METABOLIC_SYNDROM_NETWORK	NABA_MATRISOME_ASSOCIATED
6383	SDC2	syndecan 2																												NABA_MATRISOME		RUTELLA_RESPONSE_TO_HGF_VS_CSF2RB_AND_IL4_UP											CHEN_METABOLIC_SYNDROM_NETWORK	NABA_MATRISOME_ASSOCIATED			SCHUETZ_BREAST_CANCER_DUCTAL_INVASIVE_UP
50509	COL5A3	collagen, type V, alpha 3																												NABA_MATRISOME					GRAESSMANN_RESPONSE_TO_MC_AND_SERUM_DEPRIVATION_UP														GRAESSMANN_APOPTOSIS_BY_SERUM_DEPRIVATION_UP
1285	COL4A3	collagen, type IV, alpha 3 (Goodpasture antigen)																												NABA_MATRISOME					GRAESSMANN_RESPONSE_TO_MC_AND_SERUM_DEPRIVATION_UP														GRAESSMANN_APOPTOSIS_BY_SERUM_DEPRIVATION_UP
9966	TNFSF15	tumor necrosis factor (ligand) superfamily, member 15																												NABA_MATRISOME											DELYS_THYROID_CANCER_UP			NABA_MATRISOME_ASSOCIATED
5365	PLXNB3	plexin B3																												NABA_MATRISOME													CHEN_METABOLIC_SYNDROM_NETWORK	NABA_MATRISOME_ASSOCIATED
2199	FBLN2	fibulin 2																												NABA_MATRISOME													CHEN_METABOLIC_SYNDROM_NETWORK				SCHUETZ_BREAST_CANCER_DUCTAL_INVASIVE_UP
4317	MMP8	matrix metallopeptidase 8 (neutrophil collagenase)																												NABA_MATRISOME														NABA_MATRISOME_ASSOCIATED		MARTINELLI_IMMATURE_NEUTROPHIL_UP		JAATINEN_HEMATOPOIETIC_STEM_CELL_DN
30835	CD209	CD209 molecule																												NABA_MATRISOME														NABA_MATRISOME_ASSOCIATED
6368	CCL23	chemokine (C-C motif) ligand 23																												NABA_MATRISOME														NABA_MATRISOME_ASSOCIATED
5008	OSM	oncostatin M																												NABA_MATRISOME														NABA_MATRISOME_ASSOCIATED
83998	REG4	regenerating islet-derived family, member 4																												NABA_MATRISOME														NABA_MATRISOME_ASSOCIATED
79148	MMP28	matrix metallopeptidase 28																												NABA_MATRISOME														NABA_MATRISOME_ASSOCIATED
388372	CCL4L2	chemokine (C-C motif) ligand 4-like 2																												NABA_MATRISOME														NABA_MATRISOME_ASSOCIATED
114899	C1QTNF3	C1q and tumor necrosis factor related protein 3																												NABA_MATRISOME														NABA_MATRISOME_ASSOCIATED
5273	SERPINB10	serpin peptidase inhibitor, clade B (ovalbumin), member 10																												NABA_MATRISOME														NABA_MATRISOME_ASSOCIATED
151449	GDF7	growth differentiation factor 7																												NABA_MATRISOME														NABA_MATRISOME_ASSOCIATED
140862	ISM1	isthmin 1 homolog (zebrafish)																												NABA_MATRISOME														NABA_MATRISOME_ASSOCIATED
1690	COCH	coagulation factor C homolog, cochlin (Limulus polyphemus)																												NABA_MATRISOME
127435	PODN	podocan																												NABA_MATRISOME
84628	NTNG2	netrin G2																												NABA_MATRISOME
22915	MMRN1	multimerin 1																												NABA_MATRISOME
54084	TSPEAR	thrombospondin-type laminin G domain and EAR repeats																												NABA_MATRISOME
23136	EPB41L3	erythrocyte membrane protein band 4.1-like 3																													FEVR_CTNNB1_TARGETS_UP	RUTELLA_RESPONSE_TO_HGF_VS_CSF2RB_AND_IL4_UP				YANG_BCL3_TARGETS_UP							CHEN_METABOLIC_SYNDROM_NETWORK
5152	PDE9A	phosphodiesterase 9A																													FEVR_CTNNB1_TARGETS_UP
586	BCAT1	branched chain amino-acid transaminase 1, cytosolic																														RUTELLA_RESPONSE_TO_HGF_VS_CSF2RB_AND_IL4_UP									DELYS_THYROID_CANCER_UP
56833	SLAMF8	SLAM family member 8																														RUTELLA_RESPONSE_TO_HGF_VS_CSF2RB_AND_IL4_UP											CHEN_METABOLIC_SYNDROM_NETWORK				SCHUETZ_BREAST_CANCER_DUCTAL_INVASIVE_UP
26509	MYOF	myoferlin																														RUTELLA_RESPONSE_TO_HGF_VS_CSF2RB_AND_IL4_UP											CHEN_METABOLIC_SYNDROM_NETWORK
9732	DOCK4	dedicator of cytokinesis 4																														RUTELLA_RESPONSE_TO_HGF_VS_CSF2RB_AND_IL4_UP
3778	KCNMA1	potassium large conductance calcium-activated channel, subfamily M, alpha member 1																														RUTELLA_RESPONSE_TO_HGF_VS_CSF2RB_AND_IL4_UP
22921	MSRB2	methionine sulfoxide reductase B2																														RUTELLA_RESPONSE_TO_HGF_VS_CSF2RB_AND_IL4_UP
4973	OLR1	oxidized low density lipoprotein (lectin-like) receptor 1																																		YANG_BCL3_TARGETS_UP							CHEN_METABOLIC_SYNDROM_NETWORK				SCHUETZ_BREAST_CANCER_DUCTAL_INVASIVE_UP
4023	LPL	lipoprotein lipase																																							DELYS_THYROID_CANCER_UP	ICHIBA_GRAFT_VERSUS_HOST_DISEASE_35D_UP	CHEN_METABOLIC_SYNDROM_NETWORK
54587	MXRA8	matrix-remodelling associated 8																																							DELYS_THYROID_CANCER_UP		CHEN_METABOLIC_SYNDROM_NETWORK				SCHUETZ_BREAST_CANCER_DUCTAL_INVASIVE_UP
4057	LTF	lactotransferrin																																								ICHIBA_GRAFT_VERSUS_HOST_DISEASE_35D_UP						JAATINEN_HEMATOPOIETIC_STEM_CELL_DN
5657	PRTN3	proteinase 3																																								ICHIBA_GRAFT_VERSUS_HOST_DISEASE_35D_UP
2687	GGT5	gamma-glutamyltransferase 5																																									CHEN_METABOLIC_SYNDROM_NETWORK
51313	FAM198B	family with sequence similarity 198, member B																																									CHEN_METABOLIC_SYNDROM_NETWORK
8778	SIGLEC5	sialic acid binding Ig-like lectin 5																																									CHEN_METABOLIC_SYNDROM_NETWORK
3818	KLKB1	kallikrein B, plasma (Fletcher factor) 1																																									CHEN_METABOLIC_SYNDROM_NETWORK
5031	P2RY6	pyrimidinergic receptor P2Y, G-protein coupled, 6																																									CHEN_METABOLIC_SYNDROM_NETWORK
671	BPI	bactericidal/permeability-increasing protein																																												MARTINELLI_IMMATURE_NEUTROPHIL_UP
3759	KCNJ2	potassium inwardly-rectifying channel, subfamily J, member 2																																													SCHUETZ_BREAST_CANCER_DUCTAL_INVASIVE_UP
1088	CEACAM8	carcinoembryonic antigen-related cell adhesion molecule 8																																														JAATINEN_HEMATOPOIETIC_STEM_CELL_DN
51176	LEF1	lymphoid enhancer-binding factor 1																																														JAATINEN_HEMATOPOIETIC_STEM_CELL_DN
10562	OLFM4	olfactomedin 4																																														JAATINEN_HEMATOPOIETIC_STEM_CELL_DN
8991	SELENBP1	selenium binding protein 1																																														JAATINEN_HEMATOPOIETIC_STEM_CELL_DN
6521	SLC4A1	solute carrier family 4, anion exchanger, member 1 (erythrocyte membrane protein band 3, Diego blood group)																																														JAATINEN_HEMATOPOIETIC_STEM_CELL_DN
3848	KRT1	keratin 1																																														JAATINEN_HEMATOPOIETIC_STEM_CELL_DN
212	ALAS2	aminolevulinate, delta-, synthase 2																																														JAATINEN_HEMATOPOIETIC_STEM_CELL_DN
54674	LRRN3	leucine rich repeat neuronal 3																																														JAATINEN_HEMATOPOIETIC_STEM_CELL_DN
51327	AHSP	alpha hemoglobin stabilizing protein																																														JAATINEN_HEMATOPOIETIC_STEM_CELL_DN
6536	SLC6A9	solute carrier family 6 (neurotransmitter transporter, glycine), member 9																																															GRAESSMANN_APOPTOSIS_BY_SERUM_DEPRIVATION_UP
9381	OTOF	otoferlin																																															GRAESSMANN_APOPTOSIS_BY_SERUM_DEPRIVATION_UP
56938	ARNTL2	aryl hydrocarbon receptor nuclear translocator-like 2
28797	IGLV3-19	immunoglobulin lambda variable 3-19
8993	PGLYRP1	peptidoglycan recognition protein 1
57126	CD177	CD177 molecule
51560	RAB6B	RAB6B, member RAS oncogene family
56603	CYP26B1	cytochrome P450, family 26, subfamily B, polypeptide 1
23089	PEG10	paternally expressed 10
201305	SPNS3	spinster homolog 3 (Drosophila)
131540	ZDHHC19	zinc finger, DHHC-type containing 19
433	ASGR2	asialoglycoprotein receptor 2
285489	DOK7	docking protein 7
151516	ASPRV1	aspartic peptidase, retroviral-like 1
83715	ESPN	espin
400954	EML6	echinoderm microtubule associated protein like 6
57633	LRRN1	leucine rich repeat neuronal 1
84288	EFCAB2	EF-hand calcium binding domain 2
440689	HIST2H2BF	histone cluster 2, H2bf
153579	BTNL9	butyrophilin-like 9
389114	ZNF662	zinc finger protein 662
3047	HBG1	hemoglobin, gamma A
116369	SLC26A8	solute carrier family 26, member 8
164118	TTC24	tetratricopeptide repeat domain 24
83999	KREMEN1	kringle containing transmembrane protein 1
117245	HRASLS5	HRAS-like suppressor family, member 5
246778	IL27	interleukin 27
57476	GRAMD1B	GRAM domain containing 1B
51299	NRN1	neuritin 1
8857	FCGBP	Fc fragment of IgG binding protein
85442	KNDC1	kinase non-catalytic C-lobe domain (KIND) containing 1
137797	LYPD2	LY6/PLAUR domain containing 2
59341	TRPV4	transient receptor potential cation channel, subfamily V, member 4
4059	BCAM	basal cell adhesion molecule (Lutheran blood group)
8578	SCARF1	scavenger receptor class F, member 1
6539	SLC6A12	solute carrier family 6 (neurotransmitter transporter, betaine/GABA), member 12
162461	TMEM92	transmembrane protein 92
138307	LCN8	lipocalin 8
375686	SPATC1	spermatogenesis and centriole associated 1
27181	SIGLEC8	sialic acid binding Ig-like lectin 8
89872	AQP10	aquaporin 10
64105	CENPK	centromere protein K
26519	TIMM10	translocase of inner mitochondrial membrane 10 homolog (yeast)
6710	SPTB	spectrin, beta, erythrocytic
10803	CCR9	chemokine (C-C motif) receptor 9
51761	ATP8A2	ATPase, aminophospholipid transporter, class I, type 8A, member 2
440836	ODF3B	outer dense fiber of sperm tails 3B
1071	CETP	cholesteryl ester transfer protein, plasma
123099	DEGS2	degenerative spermatocyte homolog 2, lipid desaturase (Drosophila)
8365	HIST1H4H	histone cluster 1, H4h
3497	IGHE	immunoglobulin heavy constant epsilon
257019	FRMD3	FERM domain containing 3
116028	RMI2	RMI2, RecQ mediated genome instability 2, homolog (S. cerevisiae)
2994	GYPB	glycophorin B (MNS blood group)
158471	PRUNE2	prune homolog 2 (Drosophila)
222389	BEND7	BEN domain containing 7
83648	FAM167A	family with sequence similarity 167, member A
6604	SMARCD3	SWI/SNF related, matrix associated, actin dependent regulator of chromatin, subfamily d, member 3
3822	KLRC2	killer cell lectin-like receptor subfamily C, member 2
112476	PRRT2	proline-rich transmembrane protein 2
4862	NPAS2	neuronal PAS domain protein 2
120892	LRRK2	leucine-rich repeat kinase 2
284417	TMEM150B	transmembrane protein 150B
777	CACNA1E	calcium channel, voltage-dependent, R type, alpha 1E subunit
51440	HPCAL4	hippocalcin like 4
116443	GRIN3A	glutamate receptor, ionotropic, N-methyl-D-aspartate 3A
22891	ZNF365	zinc finger protein 365
161436	EML5	echinoderm microtubule associated protein like 5
660	BMX	BMX non-receptor tyrosine kinase
285180	RUFY4	RUN and FYVE domain containing 4
201191	SAMD14	sterile alpha motif domain containing 14
22981	NINL	ninein-like
6231	RPS26	ribosomal protein S26
113730	KLHDC7B	kelch domain containing 7B
11076	TPPP	tubulin polymerization promoting protein
116931	MED12L	mediator complex subunit 12-like
162515	SLC16A11	solute carrier family 16, member 11 (monocarboxylic acid transporter 11)
84179	MFSD7	major facilitator superfamily domain containing 7
348094	ANKDD1A	ankyrin repeat and death domain containing 1A
2829	XCR1	chemokine (C motif) receptor 1
283849	EXOC3L1	exocyst complex component 3-like 1
28778	IGLV6-57	immunoglobulin lambda variable 6-57
100131439	CD300LD	CD300 molecule-like family member d
28611	TRBV5-4	T cell receptor beta variable 5-4
114132	SIGLEC11	sialic acid binding Ig-like lectin 11
202134	FAM153B	family with sequence similarity 153, member B
28409	IGHV3-73	immunoglobulin heavy variable 3-73
28518	TRDV1	T cell receptor delta variable 1
28572	TRBV15	T cell receptor beta variable 15
28574	TRBV13	T cell receptor beta variable 13
28617	TRBV4-1	T cell receptor beta variable 4-1
28619	TRBV3-1	T cell receptor beta variable 3-1
28658	TRAV25	T cell receptor alpha variable 25
28667	TRAV16	T cell receptor alpha variable 16
28676	TRAV10	T cell receptor alpha variable 10
28693	TRAV1-1	T cell receptor alpha variable 1-1
28784	IGLV4-69	immunoglobulin lambda variable 4-69
28923	IGKV2-24	immunoglobulin kappa variable 2-24
28937	IGKV1-17	immunoglobulin kappa variable 1-17
3503	IGHG4	immunoglobulin heavy constant gamma 4 (G4m marker)
643418	LIPN	lipase, family member N
654483	BOLA2B	bolA homolog 2B (E. coli)
[truncated: 53 more columns]

## Sheet: TF Berry TB
GSEA (trancription factor enrichment) of Berry et al. whole blood TB disease signature
Collection(s):	C3	Type I IFN gene sets
# overlaps shown:	54	IL6/STAT3 gene sets
# genesets in collections:	836	CD34+/HSPC/monocyte/macrophage gene sets
# genes in comparison (n):	351
# genes in universe (N):	45956
Gene Set Name	# Genes in Gene Set (K)	Description	# Genes in Overlap (k)	k/K	p-value	FDR q-value
ISRE_01	247	Genes having at least one occurence of the transcription factor binding site V$ISRE_01 (v7.4 TRANSFAC) in the regions spanning up to 4 kb around their transcription starting sites.	19	0.0769	8.87e-14	3.54e-11
IRF7_01	252	Genes having at least one occurence of the transcription factor binding site V$IRF7_01 (v7.4 TRANSFAC) in the regions spanning up to 4 kb around their transcription starting sites.	19	0.0754	1.27e-13	3.54e-11
IRF1_01	250	Genes having at least one occurence of the transcription factor binding site V$IRF1_01 (v7.4 TRANSFAC) in the regions spanning up to 4 kb around their transcription starting sites.	13	0.052	8.29e-08	8.66e-06
STAT3_01	22	Genes having at least one occurence of the transcription factor binding site V$STAT3_01 (v7.4 TRANSFAC) in the regions spanning up to 4 kb around their transcription starting sites.	3	0.1364	0.000611	0.0146
ICSBP_Q6	248	Genes having at least one occurence of the transcription factor binding site V$ICSBP_Q6 (v7.4 TRANSFAC) in the regions spanning up to 4 kb around their transcription starting sites.	17	0.0685	1.15e-11	2.4e-09
STTTCRNTTT_IRF_Q6	188	Genes having at least one occurence of the highly conserved motif M85 STTTCRNTTT sites. The motif matches transcription factor binding site V$IRF_Q6 (v7.4 TRANSFAC).	19	0.1011	5.92e-16	4.95e-13
IRF_Q6	242	Genes having at least one occurence of the transcription factor binding site V$IRF_Q6 (v7.4 TRANSFAC) in the regions spanning up to 4 kb around their transcription starting sites.	16	0.0661	7.99e-11	1.34e-08
CAGGTG_E12_Q6	2485	Genes having at least one occurence of the highly conserved motif M12 CAGGTG sites. The motif matches transcription factor binding site V$E12_Q6 (v7.4 TRANSFAC).	47	0.0189	1.11e-08	1.55e-06
TGANTCA_AP1_C	1121	Genes having at least one occurence of the highly conserved motif M7 TGANTCA sites. The motif matches transcription factor binding site V$AP1_C (v7.4 TRANSFAC).	28	0.025	5.61e-08	6.7e-06
IRF2_01	125	Genes having at least one occurence of the transcription factor binding site V$IRF2_01 (v7.4 TRANSFAC) in the regions spanning up to 4 kb around their transcription starting sites.	9	0.072	5.61e-07	5.21e-05
TGGAAA_NFAT_Q4_01	1896	Genes having at least one occurence of the highly conserved motif M55 TGGAAA sites. The motif matches transcription factor binding site V$NFAT_Q4_01 (v7.4 TRANSFAC).	34	0.0179	4.4e-06	0.000368
GGGAGGRR_MAZ_Q6	2274	Genes having at least one occurence of the highly conserved motif M24 GGGAGGRR sites. The motif matches transcription factor binding site V$MAZ_Q6 (v7.4 TRANSFAC).	38	0.0167	6e-06	0.000456
TAL1BETAE47_01	248	Genes having at least one occurence of the transcription factor binding site V$TAL1BETAE47_01 (v7.4 TRANSFAC) in the regions spanning up to 4 kb around their transcription starting sites.	10	0.0403	2.41e-05	0.0016
TATAAA_TATA_01	1296	Genes having at least one occurence of the highly conserved motif M51 TATAAA sites. The motif matches transcription factor binding site V$TATA_01 (v7.4 TRANSFAC).	25	0.0193	2.64e-05	0.0016
TGGNNNNNNKCCAR_UNKNOWN	424	Genes having at least one occurence of the highly conserved motif M27 TGGNNNNNNKCCAR in the region spanning up to 4 kb around their transcription start sites. The motif does not match any known transcription factor binding site (v7.4 TRANSFAC).	13	0.0307	2.78e-05	0.0016
YNGTTNNNATT_UNKNOWN	365	Genes having at least one occurence of the highly conserved motif M170 YNGTTNNNATT in the region spanning up to 4 kb around their transcription start sites. The motif does not match any known transcription factor binding site (v7.4 TRANSFAC).	12	0.0329	2.87e-05	0.0016
RYTTCCTG_ETS2_B	1085	Genes having at least one occurence of the highly conserved motif M16 RYTTCCTG sites. The motif matches transcription factor binding site V$ETS2_B (v7.4 TRANSFAC).	22	0.0203	3.89e-05	0.00201
AFP1_Q6	264	Genes having at least one occurence of the transcription factor binding site V$AFP1_Q6 (v7.4 TRANSFAC) in the regions spanning up to 4 kb around their transcription starting sites.	10	0.0379	4.1e-05	0.00201
CAGCTG_AP4_Q5	1524	Genes having at least one occurence of the highly conserved motif M15 CAGCTG sites. The motif matches transcription factor binding site V$AP4_Q5 (v7.4 TRANSFAC).	27	0.0177	5.39e-05	0.0025
TTCYNRGAA_STAT5B_01	335	Genes having at least one occurence of the highly conserved motif M40 TTCYNRGAA sites. The motif matches transcription factor binding site V$STAT5B_01 (v7.4 TRANSFAC).	11	0.0328	6.22e-05	0.00274
CDPCR1_01	130	Genes having at least one occurence of the transcription factor binding site V$CDPCR1_01 (v7.4 TRANSFAC) in the regions spanning up to 4 kb around their transcription starting sites.	7	0.0538	6.75e-05	0.00282
NFKAPPAB65_01	237	Genes having at least one occurence of the transcription factor binding site V$NFKAPPAB65_01 (v7.4 TRANSFAC) in the regions spanning up to 4 kb around their transcription starting sites.	9	0.038	9.7e-05	0.00386
STAT5B_01	247	Genes having at least one occurence of the transcription factor binding site V$STAT5B_01 (v7.4 TRANSFAC) in the regions spanning up to 4 kb around their transcription starting sites.	9	0.0364	0.000133	0.00504
NFKAPPAB_01	251	Genes having at least one occurence of the transcription factor binding site V$NFKAPPAB_01 (v7.4 TRANSFAC) in the regions spanning up to 4 kb around their transcription starting sites.	9	0.0359	0.00015	0.00521
STAT5A_01	251	Genes having at least one occurence of the transcription factor binding site V$STAT5A_01 (v7.4 TRANSFAC) in the regions spanning up to 4 kb around their transcription starting sites.	9	0.0359	0.00015	0.00521
STAT_01	253	Genes having at least one occurence of the transcription factor binding site V$STAT_01 (v7.4 TRANSFAC) in the regions spanning up to 4 kb around their transcription starting sites.	9	0.0356	0.000159	0.00531
CREL_01	256	Genes having at least one occurence of the transcription factor binding site V$CREL_01 (v7.4 TRANSFAC) in the regions spanning up to 4 kb around their transcription starting sites.	9	0.0352	0.000173	0.00557
DR4_Q2	260	Genes having at least one occurence of the transcription factor binding site V$DR4_Q2 (v7.4 TRANSFAC) in the regions spanning up to 4 kb around their transcription starting sites.	9	0.0346	0.000194	0.00602
AREB6_01	271	Genes having at least one occurence of the transcription factor binding site V$AREB6_01 (v7.4 TRANSFAC) in the regions spanning up to 4 kb around their transcription starting sites.	9	0.0332	0.000264	0.00788
SRF_Q4	221	Genes having at least one occurence of the transcription factor binding site V$SRF_Q4 (v7.4 TRANSFAC) in the regions spanning up to 4 kb around their transcription starting sites.	8	0.0362	0.000325	0.00924
AACTTT_UNKNOWN	1890	Genes having at least one occurence of the highly conserved motif M17 AACTTT in the region spanning up to 4 kb around their transcription start sites. The motif does not match any known transcription factor binding site (v7.4 TRANSFAC).	29	0.0153	0.000332	0.00924
LHX3_01	224	Genes having at least one occurence of the transcription factor binding site V$LHX3_01 (v7.4 TRANSFAC) in the regions spanning up to 4 kb around their transcription starting sites.	8	0.0357	0.000356	0.00959
GGGTGGRR_PAX4_03	1294	Genes having at least one occurence of the highly conserved motif M56 GGGTGGRR sites. The motif matches transcription factor binding site V$PAX4_03 (v7.4 TRANSFAC).	22	0.017	0.000461	0.012
TGACCTY_ERR1_Q2	1043	Genes having at least one occurence of the highly conserved motif M25 TGACCTY sites. The motif matches transcription factor binding site V$ERR1_Q2 (v7.4 TRANSFAC).	19	0.0182	0.000492	0.0125
NKX62_Q2	241	Genes having at least one occurence of the transcription factor binding site V$NKX62_Q2 (v7.4 TRANSFAC) in the regions spanning up to 4 kb around their transcription starting sites.	8	0.0332	0.000576	0.0142
LMO2COM_02	246	Genes having at least one occurence of the transcription factor binding site V$LMO2COM_02 (v7.4 TRANSFAC) in the regions spanning up to 4 kb around their transcription starting sites.	8	0.0325	0.000659	0.0153
GCACTTT_MIR175P_MIR20A_MIR106A_MIR106B_MIR20B_MIR519D	595	Genes having at least one occurence of the motif GCACTTT in their 3' untranslated region. The motif represents putative target (that is, seed match) of human mature miRNAs hsa-miR-17-5p, hsa-miR-20a, hsa-miR-106a, hsa-miR-106b, hsa-miR-20b and hsa-miR-519d (v7.1 miRBase).	13	0.0218	0.000754	0.0167
TGGTGCT_MIR29A_MIR29B_MIR29C	521	Genes having at least one occurence of the motif TGGTGCT in their 3' untranslated region. The motif represents putative target (that is, seed match) of human mature miRNAs hsa-miR-29a, hsa-miR-29b and hsa-miR-29c (v7.1 miRBase).	12	0.023	0.000759	0.0167
GATA_Q6	198	Genes having at least one occurence of the transcription factor binding site V$GATA_Q6 (v7.4 TRANSFAC) in the regions spanning up to 4 kb around their transcription starting sites.	7	0.0354	0.000875	0.0188
PAX_Q6	259	Genes having at least one occurence of the transcription factor binding site V$PAX_Q6 (v7.4 TRANSFAC) in the regions spanning up to 4 kb around their transcription starting sites.	8	0.0309	0.000919	0.0192
NFKB_C	263	Genes having at least one occurence of the transcription factor binding site V$NFKB_C (v7.4 TRANSFAC) in the regions spanning up to 4 kb around their transcription starting sites.	8	0.0304	0.00101	0.0207
OLF1_01	272	Genes having at least one occurence of the transcription factor binding site V$OLF1_01 (v7.4 TRANSFAC) in the regions spanning up to 4 kb around their transcription starting sites.	8	0.0294	0.00126	0.0246
SRF_C	211	Genes having at least one occurence of the transcription factor binding site V$SRF_C (v7.4 TRANSFAC) in the regions spanning up to 4 kb around their transcription starting sites.	7	0.0332	0.00126	0.0246
SRF_Q5_01	220	Genes having at least one occurence of the transcription factor binding site V$SRF_Q5_01 (v7.4 TRANSFAC) in the regions spanning up to 4 kb around their transcription starting sites.	7	0.0318	0.00161	0.0305
ACTTTAT_MIR1425P	288	Genes having at least one occurence of the motif ACTTTAT in their 3' untranslated region. The motif represents putative target (that is, seed match) of human mature miRNA hsa-miR-142-5p (v7.1 miRBase).	8	0.0278	0.0018	0.0334
TTTGCAC_MIR19A_MIR19B	516	Genes having at least one occurence of the motif TTTGCAC in their 3' untranslated region. The motif represents putative target (that is, seed match) of human mature miRNAs hsa-miR-19a and hsa-miR-19b (v7.1 miRBase).	11	0.0213	0.00227	0.0413
CDPCR3HD_01	236	Genes having at least one occurence of the transcription factor binding site V$CDPCR3HD_01 (v7.4 TRANSFAC) in the regions spanning up to 4 kb around their transcription starting sites.	7	0.0297	0.00238	0.0417
RGAANNTTC_HSF1_01	446	Genes having at least one occurence of the highly conserved motif M68 RGAANNTTC sites. The motif matches transcription factor binding site V$HSF1_01 (v7.4 TRANSFAC).	10	0.0224	0.00248	0.0417
CHOP_01	238	Genes having at least one occurence of the transcription factor binding site V$CHOP_01 (v7.4 TRANSFAC) in the regions spanning up to 4 kb around their transcription starting sites.	7	0.0294	0.0025	0.0417
TGCTGCT_MIR15A_MIR16_MIR15B_MIR195_MIR424_MIR497	601	Genes having at least one occurence of the motif TGCTGCT in their 3' untranslated region. The motif represents putative target (that is, seed match) of human mature miRNAs hsa-miR-15a, hsa-miR-16, hsa-miR-15b, hsa-miR-195, hsa-miR-424 and hsa-miR-497 (v7.1 miRBase).	12	0.02	0.0025	0.0417
TTGTTT_FOXO4_01	2061	Genes having at least one occurence of the highly conserved motif M60 TTGTTT sites. The motif matches transcription factor binding site V$FOXO4_01 (v7.4 TRANSFAC).	28	0.0136	0.00254	0.0417
GATA3_01	242	Genes having at least one occurence of the transcription factor binding site V$GATA3_01 (v7.4 TRANSFAC) in the regions spanning up to 4 kb around their transcription starting sites.	7	0.0289	0.00274	0.0441
GATA1_04	245	Genes having at least one occurence of the transcription factor binding site V$GATA1_04 (v7.4 TRANSFAC) in the regions spanning up to 4 kb around their transcription starting sites.	7	0.0286	0.00293	0.0454
TBP_01	245	Genes having at least one occurence of the transcription factor binding site V$TBP_01 (v7.4 TRANSFAC) in the regions spanning up to 4 kb around their transcription starting sites.	7	0.0286	0.00293	0.0454
Gene/Gene Set Overlap Matrix
Entrez Gene Id	Gene Symbol	Gene Description	STTTCRNTTT_IRF_Q6	ISRE_01	IRF7_01	ICSBP_Q6	IRF_Q6	CAGGTG_E12_Q6	TGANTCA_AP1_C	IRF1_01	IRF2_01	TGGAAA_NFAT_Q4_01	GGGAGGRR_MAZ_Q6	TAL1BETAE47_01	TATAAA_TATA_01	TGGNNNNNNKCCAR_UNKNOWN	YNGTTNNNATT_UNKNOWN	RYTTCCTG_ETS2_B	AFP1_Q6	CAGCTG_AP4_Q5	TTCYNRGAA_STAT5B_01	CDPCR1_01	NFKAPPAB65_01	STAT5B_01	NFKAPPAB_01	STAT5A_01	STAT_01	CREL_01	DR4_Q2	AREB6_01	SRF_Q4	AACTTT_UNKNOWN	LHX3_01	GGGTGGRR_PAX4_03	TGACCTY_ERR1_Q2	NKX62_Q2	STAT3_01	LMO2COM_02	GCACTTT_MIR175P_MIR20A_MIR106A_MIR106B_MIR20B_MIR519D	TGGTGCT_MIR29A_MIR29B_MIR29C	GATA_Q6	PAX_Q6	NFKB_C	OLF1_01	SRF_C	SRF_Q5_01	ACTTTAT_MIR1425P	TTTGCAC_MIR19A_MIR19B	CDPCR3HD_01
9636	ISG15	ISG15 ubiquitin-like modifier	STTTCRNTTT_IRF_Q6	ISRE_01	IRF7_01	ICSBP_Q6	IRF_Q6			IRF1_01		TGGAAA_NFAT_Q4_01
4343	MOV10	Mov10, Moloney leukemia virus 10, homolog (mouse)	STTTCRNTTT_IRF_Q6	ISRE_01	IRF7_01	ICSBP_Q6	IRF_Q6						GGGAGGRR_MAZ_Q6			TGGNNNNNNKCCAR_UNKNOWN													DR4_Q2	AREB6_01				GGGTGGRR_PAX4_03
116071	BATF2	basic leucine zipper transcription factor, ATF-like 2	STTTCRNTTT_IRF_Q6	ISRE_01	IRF7_01	ICSBP_Q6	IRF_Q6
246778	IL27	interleukin 27	STTTCRNTTT_IRF_Q6	ISRE_01	IRF7_01	ICSBP_Q6			TGANTCA_AP1_C	IRF1_01	IRF2_01												NFKAPPAB65_01		NFKAPPAB_01			CREL_01		AREB6_01													NFKB_C
3627	CXCL10	chemokine (C-X-C motif) ligand 10	STTTCRNTTT_IRF_Q6	ISRE_01	IRF7_01		IRF_Q6			IRF1_01	IRF2_01	TGGAAA_NFAT_Q4_01											NFKAPPAB65_01		NFKAPPAB_01			CREL_01															NFKB_C
5008	OSM	oncostatin M	STTTCRNTTT_IRF_Q6	ISRE_01	IRF7_01		IRF_Q6				IRF2_01		GGGAGGRR_MAZ_Q6	TAL1BETAE47_01							TTCYNRGAA_STAT5B_01			STAT5B_01		STAT5A_01	STAT_01								TGACCTY_ERR1_Q2										SRF_C
3433	IFIT2	interferon-induced protein with tetratricopeptide repeats 2	STTTCRNTTT_IRF_Q6	ISRE_01	IRF7_01		IRF_Q6
54739	XAF1	XIAP associated factor 1	STTTCRNTTT_IRF_Q6	ISRE_01	IRF7_01					IRF1_01	IRF2_01
94240	EPSTI1	epithelial stromal interaction 1 (breast)	STTTCRNTTT_IRF_Q6	ISRE_01	IRF7_01
10673	TNFSF13B	tumor necrosis factor (ligand) superfamily, member 13b	STTTCRNTTT_IRF_Q6	ISRE_01		ICSBP_Q6	IRF_Q6			IRF1_01	IRF2_01							RYTTCCTG_ETS2_B															LHX3_01					LMO2COM_02			GATA_Q6
10561	IFI44	interferon-induced protein 44	STTTCRNTTT_IRF_Q6	ISRE_01		ICSBP_Q6	IRF_Q6
81030	ZBP1	Z-DNA binding protein 1	STTTCRNTTT_IRF_Q6	ISRE_01		ICSBP_Q6	IRF_Q6
3437	IFIT3	interferon-induced protein with tetratricopeptide repeats 3	STTTCRNTTT_IRF_Q6	ISRE_01		ICSBP_Q6
5698	PSMB9	proteasome (prosome, macropain) subunit, beta type, 9 (large multifunctional peptidase 2)	STTTCRNTTT_IRF_Q6		IRF7_01	ICSBP_Q6				IRF1_01	IRF2_01
6890	TAP1	transporter 1, ATP-binding cassette, sub-family B (MDR/TAP)	STTTCRNTTT_IRF_Q6		IRF7_01	ICSBP_Q6				IRF1_01	IRF2_01
3959	LGALS3BP	lectin, galactoside-binding, soluble, 3 binding protein	STTTCRNTTT_IRF_Q6		IRF7_01			CAGGTG_E12_Q6
3620	IDO1	indoleamine 2,3-dioxygenase 1	STTTCRNTTT_IRF_Q6			ICSBP_Q6
79365	BHLHE41	basic helix-loop-helix family, member e41	STTTCRNTTT_IRF_Q6					CAGGTG_E12_Q6					GGGAGGRR_MAZ_Q6				YNGTTNNNATT_UNKNOWN					CDPCR1_01								AREB6_01			LHX3_01						GCACTTT_MIR175P_MIR20A_MIR106A_MIR106B_MIR20B_MIR519D								ACTTTAT_MIR1425P		CDPCR3HD_01
10791	VAMP5	vesicle-associated membrane protein 5 (myobrevin)	STTTCRNTTT_IRF_Q6						TGANTCA_AP1_C			TGGAAA_NFAT_Q4_01						RYTTCCTG_ETS2_B
9966	TNFSF15	tumor necrosis factor (ligand) superfamily, member 15		ISRE_01	IRF7_01	ICSBP_Q6	IRF_Q6						GGGAGGRR_MAZ_Q6			TGGNNNNNNKCCAR_UNKNOWN							NFKAPPAB65_01		NFKAPPAB_01			CREL_01															NFKB_C
55601	DDX60	DEAD (Asp-Glu-Ala-Asp) box polypeptide 60		ISRE_01	IRF7_01		IRF_Q6
64135	IFIH1	interferon induced with helicase C domain 1		ISRE_01		ICSBP_Q6											YNGTTNNNATT_UNKNOWN																			NKX62_Q2
92610	TIFA	TRAF-interacting protein with forkhead-associated domain		ISRE_01			IRF_Q6																		NFKAPPAB_01
64108	RTP4	receptor (chemosensory) transporter protein 4		ISRE_01			IRF_Q6
5371	PML	promyelocytic leukemia		ISRE_01																CAGCTG_AP4_Q5
8651	SOCS1	suppressor of cytokine signaling 1			IRF7_01	ICSBP_Q6	IRF_Q6						GGGAGGRR_MAZ_Q6		TATAAA_TATA_01																	AACTTT_UNKNOWN		GGGTGGRR_PAX4_03						TGGTGCT_MIR29A_MIR29B_MIR29C								TTTGCAC_MIR19A_MIR19B
8676	STX11	syntaxin 11			IRF7_01				TGANTCA_AP1_C	IRF1_01			GGGAGGRR_MAZ_Q6					RYTTCCTG_ETS2_B
9241	NOG	noggin			IRF7_01					IRF1_01		TGGAAA_NFAT_Q4_01			TATAAA_TATA_01		YNGTTNNNATT_UNKNOWN		AFP1_Q6			CDPCR1_01										AACTTT_UNKNOWN			TGACCTY_ERR1_Q2									OLF1_01					CDPCR3HD_01
26499	PLEK2	pleckstrin 2			IRF7_01
8638	OASL	2'-5'-oligoadenylate synthetase-like			IRF7_01
3430	IFI35	interferon-induced protein 35				ICSBP_Q6	IRF_Q6
54674	LRRN3	leucine rich repeat neuronal 3				ICSBP_Q6			TGANTCA_AP1_C			TGGAAA_NFAT_Q4_01								CAGCTG_AP4_Q5																								OLF1_01
22797	TFEC	transcription factor EC				ICSBP_Q6				IRF1_01							YNGTTNNNATT_UNKNOWN	RYTTCCTG_ETS2_B
9246	UBE2L6	ubiquitin-conjugating enzyme E2L 6					IRF_Q6	CAGGTG_E12_Q6
127435	PODN	podocan						CAGGTG_E12_Q6	TGANTCA_AP1_C			TGGAAA_NFAT_Q4_01				TGGNNNNNNKCCAR_UNKNOWN				CAGCTG_AP4_Q5											SRF_Q4			GGGTGGRR_PAX4_03												SRF_Q5_01
10912	GADD45G	growth arrest and DNA-damage-inducible, gamma						CAGGTG_E12_Q6	TGANTCA_AP1_C				GGGAGGRR_MAZ_Q6				YNGTTNNNATT_UNKNOWN			CAGCTG_AP4_Q5											SRF_Q4							LMO2COM_02							SRF_C	SRF_Q5_01
51440	HPCAL4	hippocalcin like 4						CAGGTG_E12_Q6	TGANTCA_AP1_C				GGGAGGRR_MAZ_Q6																	AREB6_01				GGGTGGRR_PAX4_03	TGACCTY_ERR1_Q2
118932	ANKRD22	ankyrin repeat domain 22						CAGGTG_E12_Q6	TGANTCA_AP1_C
26289	AK5	adenylate kinase 5						CAGGTG_E12_Q6	TGANTCA_AP1_C
4862	NPAS2	neuronal PAS domain protein 2						CAGGTG_E12_Q6				TGGAAA_NFAT_Q4_01	GGGAGGRR_MAZ_Q6	TAL1BETAE47_01				RYTTCCTG_ETS2_B												AREB6_01	SRF_Q4	AACTTT_UNKNOWN			TGACCTY_ERR1_Q2	NKX62_Q2			GCACTTT_MIR175P_MIR20A_MIR106A_MIR106B_MIR20B_MIR519D						SRF_C	SRF_Q5_01		TTTGCAC_MIR19A_MIR19B
3985	LIMK2	LIM domain kinase 2						CAGGTG_E12_Q6				TGGAAA_NFAT_Q4_01	GGGAGGRR_MAZ_Q6				YNGTTNNNATT_UNKNOWN	RYTTCCTG_ETS2_B		CAGCTG_AP4_Q5														GGGTGGRR_PAX4_03										OLF1_01
3778	KCNMA1	potassium large conductance calcium-activated channel, subfamily M, alpha member 1						CAGGTG_E12_Q6				TGGAAA_NFAT_Q4_01	GGGAGGRR_MAZ_Q6						AFP1_Q6	CAGCTG_AP4_Q5												AACTTT_UNKNOWN	LHX3_01						GCACTTT_MIR175P_MIR20A_MIR106A_MIR106B_MIR20B_MIR519D	TGGTGCT_MIR29A_MIR29B_MIR29C
54587	MXRA8	matrix-remodelling associated 8						CAGGTG_E12_Q6				TGGAAA_NFAT_Q4_01	GGGAGGRR_MAZ_Q6
3759	KCNJ2	potassium inwardly-rectifying channel, subfamily J, member 2						CAGGTG_E12_Q6				TGGAAA_NFAT_Q4_01		TAL1BETAE47_01			YNGTTNNNATT_UNKNOWN			CAGCTG_AP4_Q5												AACTTT_UNKNOWN												OLF1_01				TTTGCAC_MIR19A_MIR19B
9053	MAP7	microtubule-associated protein 7						CAGGTG_E12_Q6				TGGAAA_NFAT_Q4_01		TAL1BETAE47_01																AREB6_01									GCACTTT_MIR175P_MIR20A_MIR106A_MIR106B_MIR20B_MIR519D
3679	ITGA7	integrin, alpha 7						CAGGTG_E12_Q6				TGGAAA_NFAT_Q4_01			TATAAA_TATA_01							CDPCR1_01													TGACCTY_ERR1_Q2	NKX62_Q2						PAX_Q6			SRF_C				CDPCR3HD_01
4023	LPL	lipoprotein lipase						CAGGTG_E12_Q6				TGGAAA_NFAT_Q4_01			TATAAA_TATA_01																									TGGTGCT_MIR29A_MIR29B_MIR29C
84628	NTNG2	netrin G2						CAGGTG_E12_Q6				TGGAAA_NFAT_Q4_01				TGGNNNNNNKCCAR_UNKNOWN				CAGCTG_AP4_Q5		CDPCR1_01										AACTTT_UNKNOWN			TGACCTY_ERR1_Q2														CDPCR3HD_01
660	BMX	BMX non-receptor tyrosine kinase						CAGGTG_E12_Q6				TGGAAA_NFAT_Q4_01						RYTTCCTG_ETS2_B																		NKX62_Q2
162515	SLC16A11	solute carrier family 16, member 11 (monocarboxylic acid transporter 11)						CAGGTG_E12_Q6				TGGAAA_NFAT_Q4_01
1890	TYMP	thymidine phosphorylase						CAGGTG_E12_Q6				TGGAAA_NFAT_Q4_01
57633	LRRN1	leucine rich repeat neuronal 1						CAGGTG_E12_Q6					GGGAGGRR_MAZ_Q6	TAL1BETAE47_01						CAGCTG_AP4_Q5												AACTTT_UNKNOWN
51176	LEF1	lymphoid enhancer-binding factor 1						CAGGTG_E12_Q6					GGGAGGRR_MAZ_Q6	TAL1BETAE47_01						CAGCTG_AP4_Q5												AACTTT_UNKNOWN
712	C1QA	complement component 1, q subcomponent, A chain						CAGGTG_E12_Q6					GGGAGGRR_MAZ_Q6	TAL1BETAE47_01																AREB6_01
6382	SDC1	syndecan 1						CAGGTG_E12_Q6					GGGAGGRR_MAZ_Q6			TGGNNNNNNKCCAR_UNKNOWN					TTCYNRGAA_STAT5B_01			STAT5B_01		STAT5A_01	STAT_01																					TTTGCAC_MIR19A_MIR19B
118788	PIK3AP1	phosphoinositide-3-kinase adaptor protein 1						CAGGTG_E12_Q6					GGGAGGRR_MAZ_Q6							CAGCTG_AP4_Q5									DR4_Q2
6622	SNCA	synuclein, alpha (non A4 component of amyloid precursor)						CAGGTG_E12_Q6					GGGAGGRR_MAZ_Q6																			AACTTT_UNKNOWN
7855	FZD5	frizzled family receptor 5						CAGGTG_E12_Q6					GGGAGGRR_MAZ_Q6																			AACTTT_UNKNOWN
714	C1QC	complement component 1, q subcomponent, C chain						CAGGTG_E12_Q6					GGGAGGRR_MAZ_Q6
4059	BCAM	basal cell adhesion molecule (Lutheran blood group)						CAGGTG_E12_Q6					GGGAGGRR_MAZ_Q6
2710	GK	glycerol kinase						CAGGTG_E12_Q6						TAL1BETAE47_01				RYTTCCTG_ETS2_B			TTCYNRGAA_STAT5B_01			STAT5B_01		STAT5A_01	STAT_01					AACTTT_UNKNOWN			TGACCTY_ERR1_Q2
6710	SPTB	spectrin, beta, erythrocytic						CAGGTG_E12_Q6							TATAAA_TATA_01	TGGNNNNNNKCCAR_UNKNOWN			AFP1_Q6						NFKAPPAB_01			CREL_01	DR4_Q2			AACTTT_UNKNOWN		GGGTGGRR_PAX4_03				LMO2COM_02					NFKB_C
6280	S100A9	S100 calcium binding protein A9						CAGGTG_E12_Q6							TATAAA_TATA_01			RYTTCCTG_ETS2_B												AREB6_01
9381	OTOF	otoferlin						CAGGTG_E12_Q6							TATAAA_TATA_01
8857	FCGBP	Fc fragment of IgG binding protein						CAGGTG_E12_Q6								TGGNNNNNNKCCAR_UNKNOWN		RYTTCCTG_ETS2_B		CAGCTG_AP4_Q5														GGGTGGRR_PAX4_03
6521	SLC4A1	solute carrier family 4, anion exchanger, member 1 (erythrocyte membrane protein band 3, Diego blood group)						CAGGTG_E12_Q6								TGGNNNNNNKCCAR_UNKNOWN				CAGCTG_AP4_Q5														GGGTGGRR_PAX4_03				LMO2COM_02			GATA_Q6
285489	DOK7	docking protein 7						CAGGTG_E12_Q6								TGGNNNNNNKCCAR_UNKNOWN				CAGCTG_AP4_Q5
1845	DUSP3	dual specificity phosphatase 3						CAGGTG_E12_Q6								TGGNNNNNNKCCAR_UNKNOWN																			TGACCTY_ERR1_Q2									OLF1_01
777	CACNA1E	calcium channel, voltage-dependent, R type, alpha 1E subunit						CAGGTG_E12_Q6									YNGTTNNNATT_UNKNOWN															AACTTT_UNKNOWN		GGGTGGRR_PAX4_03										OLF1_01
64866	CDCP1	CUB domain containing protein 1						CAGGTG_E12_Q6										RYTTCCTG_ETS2_B
3659	IRF1	interferon regulatory factor 1						CAGGTG_E12_Q6																STAT5B_01	NFKAPPAB_01	STAT5A_01	STAT_01					AACTTT_UNKNOWN		GGGTGGRR_PAX4_03			STAT3_01		GCACTTT_MIR175P_MIR20A_MIR106A_MIR106B_MIR20B_MIR519D				NFKB_C
1285	COL4A3	collagen, type IV, alpha 3 (Goodpasture antigen)						CAGGTG_E12_Q6																					DR4_Q2				LHX3_01						GCACTTT_MIR175P_MIR20A_MIR106A_MIR106B_MIR20B_MIR519D	TGGTGCT_MIR29A_MIR29B_MIR29C	GATA_Q6						ACTTTAT_MIR1425P
116931	MED12L	mediator complex subunit 12-like						CAGGTG_E12_Q6																								AACTTT_UNKNOWN	LHX3_01			NKX62_Q2			GCACTTT_MIR175P_MIR20A_MIR106A_MIR106B_MIR20B_MIR519D	TGGTGCT_MIR29A_MIR29B_MIR29C							ACTTTAT_MIR1425P	TTTGCAC_MIR19A_MIR19B
2643	GCH1	GTP cyclohydrolase 1						CAGGTG_E12_Q6																								AACTTT_UNKNOWN		GGGTGGRR_PAX4_03													ACTTTAT_MIR1425P
161436	EML5	echinoderm microtubule associated protein like 5						CAGGTG_E12_Q6																																TGGTGCT_MIR29A_MIR29B_MIR29C
9021	SOCS3	suppressor of cytokine signaling 3						CAGGTG_E12_Q6																																								TTTGCAC_MIR19A_MIR19B
79651	RHBDF2	rhomboid 5 homolog 2 (Drosophila)						CAGGTG_E12_Q6
10170	DHRS9	dehydrogenase/reductase (SDR family) member 9						CAGGTG_E12_Q6
9732	DOCK4	dedicator of cytokinesis 4							TGANTCA_AP1_C			TGGAAA_NFAT_Q4_01	GGGAGGRR_MAZ_Q6				YNGTTNNNATT_UNKNOWN	RYTTCCTG_ETS2_B		CAGCTG_AP4_Q5	TTCYNRGAA_STAT5B_01		NFKAPPAB65_01	STAT5B_01			STAT_01	CREL_01				AACTTT_UNKNOWN										PAX_Q6
6539	SLC6A12	solute carrier family 6 (neurotransmitter transporter, betaine/GABA), member 12							TGANTCA_AP1_C			TGGAAA_NFAT_Q4_01	GGGAGGRR_MAZ_Q6										NFKAPPAB65_01		NFKAPPAB_01			CREL_01															NFKB_C
688	KLF5	Kruppel-like factor 5 (intestinal)							TGANTCA_AP1_C			TGGAAA_NFAT_Q4_01								CAGCTG_AP4_Q5														GGGTGGRR_PAX4_03
133	ADM	adrenomedullin							TGANTCA_AP1_C			TGGAAA_NFAT_Q4_01																	DR4_Q2			AACTTT_UNKNOWN						LMO2COM_02			GATA_Q6
54757	FAM20A	family with sequence similarity 20, member A							TGANTCA_AP1_C				GGGAGGRR_MAZ_Q6					RYTTCCTG_ETS2_B
50509	COL5A3	collagen, type V, alpha 3							TGANTCA_AP1_C				GGGAGGRR_MAZ_Q6							CAGCTG_AP4_Q5														GGGTGGRR_PAX4_03						TGGTGCT_MIR29A_MIR29B_MIR29C
3717	JAK2	Janus kinase 2							TGANTCA_AP1_C				GGGAGGRR_MAZ_Q6
50486	G0S2	G0/G1switch 2							TGANTCA_AP1_C						TATAAA_TATA_01																				TGACCTY_ERR1_Q2
4318	MMP9	matrix metallopeptidase 9 (gelatinase B, 92kDa gelatinase, 92kDa type IV collagenase)							TGANTCA_AP1_C									RYTTCCTG_ETS2_B					NFKAPPAB65_01		NFKAPPAB_01			CREL_01
719	C3AR1	complement component 3a receptor 1							TGANTCA_AP1_C										AFP1_Q6
8291	DYSF	dysferlin, limb girdle muscular dystrophy 2B (autosomal recessive)							TGANTCA_AP1_C											CAGCTG_AP4_Q5
1824	DSC2	desmocollin 2							TGANTCA_AP1_C														NFKAPPAB65_01
79056	PRRG4	proline rich Gla (G-carboxyglutamic acid) 4 (transmembrane)							TGANTCA_AP1_C																				DR4_Q2													PAX_Q6
51313	FAM198B	family with sequence similarity 198, member B							TGANTCA_AP1_C																							AACTTT_UNKNOWN			TGACCTY_ERR1_Q2
10803	CCR9	chemokine (C-C motif) receptor 9							TGANTCA_AP1_C																									GGGTGGRR_PAX4_03
201191	SAMD14	sterile alpha motif domain containing 14							TGANTCA_AP1_C																										TGACCTY_ERR1_Q2
4973	OLR1	oxidized low density lipoprotein (lectin-like) receptor 1							TGANTCA_AP1_C
6772	STAT1	signal transducer and activator of transcription 1, 91kDa							TGANTCA_AP1_C
56938	ARNTL2	aryl hydrocarbon receptor nuclear translocator-like 2							TGANTCA_AP1_C
467	ATF3	activating transcription factor 3								IRF1_01	IRF2_01								AFP1_Q6													AACTTT_UNKNOWN			TGACCTY_ERR1_Q2							PAX_Q6				SRF_Q5_01
3601	IL15RA	interleukin 15 receptor, alpha								IRF1_01	IRF2_01
56833	SLAMF8	SLAM family member 8								IRF1_01													NFKAPPAB65_01		NFKAPPAB_01			CREL_01															NFKB_C
56603	CYP26B1	cytochrome P450, family 26, subfamily B, polypeptide 1										TGGAAA_NFAT_Q4_01			TATAAA_TATA_01		YNGTTNNNATT_UNKNOWN		AFP1_Q6			CDPCR1_01								AREB6_01		AACTTT_UNKNOWN		GGGTGGRR_PAX4_03					GCACTTT_MIR175P_MIR20A_MIR106A_MIR106B_MIR20B_MIR519D
114899	C1QTNF3	C1q and tumor necrosis factor related protein 3										TGGAAA_NFAT_Q4_01			TATAAA_TATA_01				AFP1_Q6																	NKX62_Q2
6279	S100A8	S100 calcium binding protein A8										TGGAAA_NFAT_Q4_01			TATAAA_TATA_01					CAGCTG_AP4_Q5
2335	FN1	fibronectin 1										TGGAAA_NFAT_Q4_01			TATAAA_TATA_01						TTCYNRGAA_STAT5B_01						STAT_01
8743	TNFSF10	tumor necrosis factor (ligand) superfamily, member 10										TGGAAA_NFAT_Q4_01			TATAAA_TATA_01																	AACTTT_UNKNOWN				NKX62_Q2						PAX_Q6
6272	SORT1	sortilin 1										TGGAAA_NFAT_Q4_01																			SRF_Q4				TGACCTY_ERR1_Q2
55640	FLVCR2	feline leukemia virus subgroup C cellular receptor family, member 2										TGGAAA_NFAT_Q4_01																						GGGTGGRR_PAX4_03
51056	LAP3	leucine aminopeptidase 3										TGGAAA_NFAT_Q4_01
5273	SERPINB10	serpin peptidase inhibitor, clade B (ovalbumin), member 10										TGGAAA_NFAT_Q4_01
4057	LTF	lactotransferrin										TGGAAA_NFAT_Q4_01
7453	WARS	tryptophanyl-tRNA synthetase										TGGAAA_NFAT_Q4_01
83715	ESPN	espin										TGGAAA_NFAT_Q4_01
8739	HRK	harakiri, BCL2 interacting protein (contains only BH3 domain)											GGGAGGRR_MAZ_Q6	TAL1BETAE47_01																		AACTTT_UNKNOWN	LHX3_01
19	ABCA1	ATP-binding cassette, sub-family A (ABC1), member 1											GGGAGGRR_MAZ_Q6		TATAAA_TATA_01														DR4_Q2										GCACTTT_MIR175P_MIR20A_MIR106A_MIR106B_MIR20B_MIR519D							SRF_Q5_01	ACTTTAT_MIR1425P	TTTGCAC_MIR19A_MIR19B
8578	SCARF1	scavenger receptor class F, member 1											GGGAGGRR_MAZ_Q6		TATAAA_TATA_01																			GGGTGGRR_PAX4_03														TTTGCAC_MIR19A_MIR19B
112476	PRRT2	proline-rich transmembrane protein 2											GGGAGGRR_MAZ_Q6					RYTTCCTG_ETS2_B					NFKAPPAB65_01					CREL_01				AACTTT_UNKNOWN																	CDPCR3HD_01
4353	MPO	myeloperoxidase											GGGAGGRR_MAZ_Q6					RYTTCCTG_ETS2_B
51560	RAB6B	RAB6B, member RAS oncogene family											GGGAGGRR_MAZ_Q6																DR4_Q2					GGGTGGRR_PAX4_03	TGACCTY_ERR1_Q2					TGGTGCT_MIR29A_MIR29B_MIR29C							ACTTTAT_MIR1425P
6536	SLC6A9	solute carrier family 6 (neurotransmitter transporter, glycine), member 9											GGGAGGRR_MAZ_Q6																						TGACCTY_ERR1_Q2				GCACTTT_MIR175P_MIR20A_MIR106A_MIR106B_MIR20B_MIR519D					OLF1_01
3934	LCN2	lipocalin 2											GGGAGGRR_MAZ_Q6																						TGACCTY_ERR1_Q2								NFKB_C
10643	IGF2BP3	insulin-like growth factor 2 mRNA binding protein 3											GGGAGGRR_MAZ_Q6																																		ACTTTAT_MIR1425P
257019	FRMD3	FERM domain containing 3											GGGAGGRR_MAZ_Q6
6604	SMARCD3	SWI/SNF related, matrix associated, actin dependent regulator of chromatin, subfamily d, member 3											GGGAGGRR_MAZ_Q6
117854	TRIM6	tripartite motif containing 6											GGGAGGRR_MAZ_Q6
710	SERPING1	serpin peptidase inhibitor, clade G (C1 inhibitor), member 1												TAL1BETAE47_01							TTCYNRGAA_STAT5B_01	CDPCR1_01		STAT5B_01		STAT5A_01	STAT_01					AACTTT_UNKNOWN					STAT3_01					PAX_Q6							CDPCR3HD_01
8685	MARCO	macrophage receptor with collagenous structure													TATAAA_TATA_01			RYTTCCTG_ETS2_B
7504	XK	X-linked Kx blood group (McLeod syndrome)													TATAAA_TATA_01				AFP1_Q6												SRF_Q4														SRF_C	SRF_Q5_01
338339	CLEC4D	C-type lectin domain family 4, member D													TATAAA_TATA_01					CAGCTG_AP4_Q5																						PAX_Q6
200942	KLHDC8B	kelch domain containing 8B													TATAAA_TATA_01																							LMO2COM_02
1690	COCH	coagulation factor C homolog, cochlin (Limulus polyphemus)													TATAAA_TATA_01
6368	CCL23	chemokine (C-C motif) ligand 23													TATAAA_TATA_01
85236	HIST1H2BK	histone cluster 1, H2bk													TATAAA_TATA_01
2947	GSTM3	glutathione S-transferase mu 3 (brain)													TATAAA_TATA_01
4317	MMP8	matrix metallopeptidase 8 (neutrophil collagenase)													TATAAA_TATA_01
671	BPI	bactericidal/permeability-increasing protein													TATAAA_TATA_01
306	ANXA3	annexin A3														TGGNNNNNNKCCAR_UNKNOWN
6948	TCN2	transcobalamin II														TGGNNNNNNKCCAR_UNKNOWN
820	CAMP	cathelicidin antimicrobial peptide														TGGNNNNNNKCCAR_UNKNOWN
116443	GRIN3A	glutamate receptor, ionotropic, N-methyl-D-aspartate 3A															YNGTTNNNATT_UNKNOWN															AACTTT_UNKNOWN
9957	HS3ST1	heparan sulfate (glucosamine) 3-O-sulfotransferase 1															YNGTTNNNATT_UNKNOWN
4299	AFF1	AF4/FMR2 family, member 1																RYTTCCTG_ETS2_B			TTCYNRGAA_STAT5B_01																											TTTGCAC_MIR19A_MIR19B
1534	CYB561	cytochrome b-561																RYTTCCTG_ETS2_B
3822	KLRC2	killer cell lectin-like receptor subfamily C, member 2																RYTTCCTG_ETS2_B
201305	SPNS3	spinster homolog 3 (Drosophila)																RYTTCCTG_ETS2_B
22915	MMRN1	multimerin 1																RYTTCCTG_ETS2_B
2199	FBLN2	fibulin 2																	AFP1_Q6														LHX3_01
23136	EPB41L3	erythrocyte membrane protein band 4.1-like 3																	AFP1_Q6																	NKX62_Q2
5365	PLXNB3	plexin B3																		CAGCTG_AP4_Q5														GGGTGGRR_PAX4_03				LMO2COM_02			GATA_Q6
57590	WDFY1	WD repeat and FYVE domain containing 1																		CAGCTG_AP4_Q5																				TGGTGCT_MIR29A_MIR29B_MIR29C
10184	LHFPL2	lipoma HMGIC fusion partner-like 2																		CAGCTG_AP4_Q5
196410	METTL7B	methyltransferase like 7B																		CAGCTG_AP4_Q5
8343	HIST1H2BF	histone cluster 1, H2bf																		CAGCTG_AP4_Q5
285180	RUFY4	RUN and FYVE domain containing 4																		CAGCTG_AP4_Q5
6773	STAT2	signal transducer and activator of transcription 2, 113kDa																		CAGCTG_AP4_Q5
5359	PLSCR1	phospholipid scramblase 1																			TTCYNRGAA_STAT5B_01			STAT5B_01		STAT5A_01	STAT_01
164118	TTC24	tetratricopeptide repeat domain 24																			TTCYNRGAA_STAT5B_01			STAT5B_01		STAT5A_01	STAT_01
5627	PROS1	protein S (alpha)																			TTCYNRGAA_STAT5B_01			STAT5B_01		STAT5A_01											STAT3_01
51761	ATP8A2	ATPase, aminophospholipid transporter, class I, type 8A, member 2																			TTCYNRGAA_STAT5B_01					STAT5A_01						AACTTT_UNKNOWN
3600	IL15	interleukin 15																				CDPCR1_01																											CDPCR3HD_01
26519	TIMM10	translocase of inner mitochondrial membrane 10 homolog (yeast)																											DR4_Q2
1844	DUSP2	dual specificity phosphatase 2																													SRF_Q4								GCACTTT_MIR175P_MIR20A_MIR106A_MIR106B_MIR20B_MIR519D	TGGTGCT_MIR29A_MIR29B_MIR29C					SRF_C		ACTTTAT_MIR1425P
10398	MYL9	myosin, light chain 9, regulatory																													SRF_Q4														SRF_C	SRF_Q5_01
162461	TMEM92	transmembrane protein 92																													SRF_Q4
29126	CD274	CD274 molecule																														AACTTT_UNKNOWN										PAX_Q6
5152	PDE9A	phosphodiesterase 9A																														AACTTT_UNKNOWN
10562	OLFM4	olfactomedin 4																															LHX3_01
83999	KREMEN1	kringle containing transmembrane protein 1																																GGGTGGRR_PAX4_03
1308	COL17A1	collagen, type XVII, alpha 1																																GGGTGGRR_PAX4_03
79148	MMP28	matrix metallopeptidase 28																																GGGTGGRR_PAX4_03
6535	SLC6A8	solute carrier family 6 (neurotransmitter transporter, creatine), member 8																																	TGACCTY_ERR1_Q2													TTTGCAC_MIR19A_MIR19B
375686	SPATC1	spermatogenesis and centriole associated 1																																	TGACCTY_ERR1_Q2
3240	HP	haptoglobin																																	TGACCTY_ERR1_Q2
3772	KCNJ15	potassium inwardly-rectifying channel, subfamily J, member 15																																				LMO2COM_02			GATA_Q6
54464	XRN1	5'-3' exoribonuclease 1																																					GCACTTT_MIR175P_MIR20A_MIR106A_MIR106B_MIR20B_MIR519D
3984	LIMK1	LIM domain kinase 1																																					GCACTTT_MIR175P_MIR20A_MIR106A_MIR106B_MIR20B_MIR519D
83648	FAM167A	family with sequence similarity 167, member A																																						TGGTGCT_MIR29A_MIR29B_MIR29C
283849	EXOC3L1	exocyst complex component 3-like 1																																						TGGTGCT_MIR29A_MIR29B_MIR29C
6006	RHCE	Rh blood group, CcEe antigens																																							GATA_Q6
2621	GAS6	growth arrest-specific 6																																										OLF1_01
158471	PRUNE2	prune homolog 2 (Drosophila)																																														TTTGCAC_MIR19A_MIR19B
27065	D4S234E	DNA segment on chromosome 4 (unique) 234 expressed sequence
205	AK4	adenylate kinase 4
4061	LY6E	lymphocyte antigen 6 complex, locus E
56994	CHPT1	choline phosphotransferase 1
8991	SELENBP1	selenium binding protein 1
151449	GDF7	growth differentiation factor 7
4481	MSR1	macrophage scavenger receptor 1
3848	KRT1	keratin 1
4502	MT2A	metallothionein 2A
6383	SDC2	syndecan 2
26010	SPATS2L	spermatogenesis associated, serine-rich 2-like
433	ASGR2	asialoglycoprotein receptor 2
22891	ZNF365	zinc finger protein 365
26509	MYOF	myoferlin
2829	XCR1	chemokine (C motif) receptor 1
56670	SUCNR1	succinate receptor 1
59341	TRPV4	transient receptor potential cation channel, subfamily V, member 4
116028	RMI2	RMI2, RecQ mediated genome instability 2, homolog (S. cerevisiae)
3818	KLKB1	kallikrein B, plasma (Fletcher factor) 1
9447	AIM2	absent in melanoma 2
9050	PSTPIP2	proline-serine-threonine phosphatase interacting protein 2
4582	MUC1	mucin 1, cell surface associated
83998	REG4	regenerating islet-derived family, member 4
23034	SAMD4A	sterile alpha motif domain containing 4A
5031	P2RY6	pyrimidinergic receptor P2Y, G-protein coupled, 6
55647	RAB20	RAB20, member RAS oncogene family
3674	ITGA2B	integrin, alpha 2b (platelet glycoprotein IIb of IIb/IIIa complex, antigen CD41)
80380	PDCD1LG2	programmed cell death 1 ligand 2
717	C2	complement component 2
120892	LRRK2	leucine-rich repeat kinase 2
2537	IFI6	interferon, alpha-inducible protein 6
8365	HIST1H4H	histone cluster 1, H4h
713	C1QB	complement component 1, q subcomponent, B chain
22981	NINL	ninein-like
6285	S100B	S100 calcium binding protein B
11076	TPPP	tubulin polymerization promoting protein
3665	IRF7	interferon regulatory factor 7
440836	ODF3B	outer dense fiber of sperm tails 3B
2209	FCGR1A	Fc fragment of IgG, high affinity Ia, receptor (CD64)
6891	TAP2	transporter 2, ATP-binding cassette, sub-family B (MDR/TAP)
84288	EFCAB2	EF-hand calcium binding domain 2
634	CEACAM1	carcinoembryonic antigen-related cell adhesion molecule 1 (biliary glycoprotein)
2215	FCGR3B	Fc fragment of IgG, low affinity IIIb, receptor (CD16b)
51338	MS4A4A	membrane-spanning 4-domains, subfamily A, member 4
54625	PARP14	poly (ADP-ribose) polymerase family, member 14
115362	GBP5	guanylate binding protein 5
586	BCAT1	branched chain amino-acid transaminase 1, cytosolic
116369	SLC26A8	solute carrier family 26, member 8
137797	LYPD2	LY6/PLAUR domain containing 2
131540	ZDHHC19	zinc finger, DHHC-type containing 19
53831	GPR84	G protein-coupled receptor 84
100131439	CD300LD	CD300 molecule-like family member d
10321	CRISP3	cysteine-rich secretory protein 3
10346	TRIM22	tripartite motif containing 22
10410	IFITM3	interferon induced transmembrane protein 3
1071	CETP	cholesteryl ester transfer protein, plasma
1088	CEACAM8	carcinoembryonic antigen-related cell adhesion molecule 8
10964	IFI44L	interferon-induced protein 44-like
11006	LILRB4	leukocyte immunoglobulin-like receptor, subfamily B (with TM and ITIM domains), member 4
113730	KLHDC7B	kelch domain containing 7B
114132	SIGLEC11	sialic acid binding Ig-like lectin 11
115361	GBP4	guanylate binding protein 4
117245	HRASLS5	HRAS-like suppressor family, member 5
123099	DEGS2	degenerative spermatocyte homolog 2, lipid desaturase (Drosophila)
129607	CMPK2	cytidine monophosphate (UMP-CMP) kinase 2, mitochondrial
138307	LCN8	lipocalin 8
140862	ISM1	isthmin 1 homolog (zebrafish)
147700	KLC3	kinesin light chain 3
151516	ASPRV1	aspartic peptidase, retroviral-like 1
153579	BTNL9	butyrophilin-like 9
154664	ABCA13	ATP-binding cassette, sub-family A (ABC1), member 13
163351	GBP6	guanylate binding protein family, member 6
1667	DEFA1	defensin, alpha 1
1668	DEFA3	defensin, alpha 3, neutrophil-specific
1669	DEFA4	defensin, alpha 4, corticostatin
1991	ELANE	elastase, neutrophil expressed
202134	FAM153B	family with sequence similarity 153, member B
212	ALAS2	aminolevulinate, delta-, synthase 2
219285	SAMD9L	sterile alpha motif domain containing 9-like
2210	FCGR1B	Fc fragment of IgG, high affinity Ib, receptor (CD64)
222389	BEND7	BEN domain containing 7
22921	MSRB2	methionine sulfoxide reductase B2
23089	PEG10	paternally expressed 10
23780	APOL2	apolipoprotein L, 2
26270	FBXO6	F-box protein 6
2633	GBP1	guanylate binding protein 1, interferon-inducible
2634	GBP2	guanylate binding protein 2, interferon-inducible
2635	GBP3	guanylate binding protein 3
2687	GGT5	gamma-glutamyltransferase 5
27074	LAMP3	lysosomal-associated membrane protein 3
27181	SIGLEC8	sialic acid binding Ig-like lectin 8
2760	GM2A	GM2 ganglioside activator
28409	IGHV3-73	immunoglobulin heavy variable 3-73
284417	TMEM150B	transmembrane protein 150B
28517	TRDV2	T cell receptor delta variable 2
28518	TRDV1	T cell receptor delta variable 1
28572	TRBV15	T cell receptor beta variable 15
28574	TRBV13	T cell receptor beta variable 13
28611	TRBV5-4	T cell receptor beta variable 5-4
28617	TRBV4-1	T cell receptor beta variable 4-1
28619	TRBV3-1	T cell receptor beta variable 3-1
28658	TRAV25	T cell receptor alpha variable 25
28667	TRAV16	T cell receptor alpha variable 16
28676	TRAV10	T cell receptor alpha variable 10
28693	TRAV1-1	T cell receptor alpha variable 1-1
28778	IGLV6-57	immunoglobulin lambda variable 6-57
28784	IGLV4-69	immunoglobulin lambda variable 4-69
28797	IGLV3-19	immunoglobulin lambda variable 3-19
28923	IGKV2-24	immunoglobulin kappa variable 2-24
28937	IGKV1-17	immunoglobulin kappa variable 1-17
2994	GYPB	glycophorin B (MNS blood group)
3045	HBD	hemoglobin, delta
3047	HBG1	hemoglobin, gamma A
30835	CD209	CD209 molecule
3429	IFI27	interferon, alpha-inducible protein 27
346157	ZNF391	zinc finger protein 391
348094	ANKDD1A	ankyrin repeat and death domain containing 1A
3497	IGHE	immunoglobulin heavy constant epsilon
3503	IGHG4	immunoglobulin heavy constant gamma 4 (G4m marker)
3812	KIR3DL2	killer cell immunoglobulin-like receptor, three domains, long cytoplasmic tail, 2
388372	CCL4L2	chemokine (C-C motif) ligand 4-like 2
389114	ZNF662	zinc finger protein 662
400954	EML6	echinoderm microtubule associated protein like 6
440689	HIST2H2BF	histone cluster 2, H2bf
441168	FAM26F	family with sequence similarity 26, member F
4671	NAIP	NLR family, apoptosis inhibitory protein
4680	CEACAM6	carcinoembryonic antigen-related cell adhesion molecule 6 (non-specific cross reacting antigen)
4938	OAS1	2'-5'-oligoadenylate synthetase 1, 40/46kDa
4939	OAS2	2'-5'-oligoadenylate synthetase 2, 69/71kDa
4940	OAS3	2'-5'-oligoadenylate synthetase 3, 100kDa
51299	NRN1	neuritin 1
51327	AHSP	alpha hemoglobin stabilizing protein
51513	ETV7	ets variant 7
54084	TSPEAR	thrombospondin-type laminin G domain and EAR repeats
55092	TMEM51	transmembrane protein 51
55281	TMEM140	transmembrane protein 140
55966	AJAP1	adherens junctions associated protein 1
5657	PRTN3	proteinase 3
566	AZU1	azurocidin 1
57126	CD177	CD177 molecule
57168	ASPHD2	aspartate beta-hydroxylase domain containing 2
57476	GRAMD1B	GRAM domain containing 1B
57674	RNF213	ring finger protein 213
5909	RAP1GAP	RAP1 GTPase activating protein
6231	RPS26	ribosomal protein S26
6283	S100A12	S100 calcium binding protein A12
6398	SECTM1	secreted and transmembrane 1
64105	CENPK	centromere protein K
643418	LIPN	lipase, family member N
654483	BOLA2B	bolA homolog 2B (E. coli)
6614	SIGLEC1	sialic acid binding Ig-like lectin 1, sialoadhesin
7052	TGM2	transglutaminase 2 (C polypeptide, protein-glutamine-gamma-glutamyltransferase)
7100	TLR5	toll-like receptor 5
7130	TNFAIP6	tumor necrosis factor, alpha-induced protein 6
80830	APOL6	apolipoprotein L, 6
80832	APOL4	apolipoprotein L, 4
83666	PARP9	poly (ADP-ribose) polymerase family, member 9
838	CASP5	caspase 5, apoptosis-related cysteine peptidase
84179	MFSD7	major facilitator superfamily domain containing 7
8519	IFITM1	interferon induced transmembrane protein 1 (9-27)
8542	APOL1	apolipoprotein L, 1
85442	KNDC1	kinase non-catalytic C-lobe domain (KIND) containing 1
8778	SIGLEC5	sialic acid binding Ig-like lectin 5
89872	AQP10	aquaporin 10
8993	PGLYRP1	peptidoglycan recognition protein 1
91351	DDX60L	DEAD (Asp-Glu-Ala-Asp) box polypeptide 60-like
91543	RSAD2	radical S-adenosyl methionine domain containing 2
93978	CLEC6A	C-type lectin domain family 6, member A
9672	SDC3	syndecan 3
9934	P2RY14	purinergic receptor P2Y, G-protein coupled, 14
9997	SCO2	SCO cytochrome oxidase deficient homolog 2 (yeast)
[truncated: 7 more columns]

## Sheet: TB proteome
Plasma proteome analysis, selected genes from Scriba et al. (2018)
Gene	FC	day before TB diagnosis	p-value
PLA2G2A	1.84373	-894	0.00164915		Type I IFN gene sets
SPTLC1	0.717729	-450.921	0.00122113		IL6/STAT3 gene sets
CD163	0.529283	-435.461	0.00202491		CD34+/HSPC/monocyte/macrophage gene sets
CRP	2.47444	-383.927	0.00140323
IRF1	-0.338915	-365.89	0.00484752
CXCL10	0.994688	-298.896	0.00155309
HP	0.571423	-267.976	0.00380876
CXCL9	1.01989	-262.823	0.00186009
CFB	0.390357	-255.092	0.00216173
STAT1	0.989677	-252.516	0.00190438
CD38	-0.148835	-229.326	0.00876537
IL6	0.715183	-226.749	0.00207751
IFNAR1	-0.285629	-180.368	0.00470494
SERPINA1	0.427768	-177.792	0.00347757
CD34	-0.246767	-172.638	0.00666533
STAT3	0.432092	-170.062	0.00285657
MMP9	0.573581	-167.485	0.0106645
KITLG	-0.398091	-159.755	0.015235

## Sheet: Diss TB
GSEA (curated gene sets) of differentially expressed genes between extrapulmonary TB vs pulmonary TB
Collection(s):	C2	Type I IFN gene sets
# overlaps shown:	100	IL6/STAT3 gene sets
# genesets in collections:	4738	CD34+/HSPC/monocyte/macrophage gene sets
# genes in comparison (n):	796
# genes in universe (N):	45956
Gene Set Name	# Genes in Gene Set (K)	Description	# Genes in Overlap (k)	k/K	p-value	FDR q-value
PILON_KLF1_TARGETS_DN	1972	Genes down-regulated in erythroid progenitor cells from fetal livers of E13.5 embryos with KLF1 [GeneID=10661] knockout compared to those from the wild type embryos.	155	0.0786	1.49e-57	7.08e-54
DACOSTA_UV_RESPONSE_VIA_ERCC3_DN	855	Genes down-regulated in fibroblasts expressing mutant forms of ERCC3 [GeneID=2071] after UV irradiation.	87	0.1018	1.93e-40	4.58e-37
PUJANA_ATM_PCC_NETWORK	1442	Genes constituting the ATM-PCC network of transcripts whose expression positively correlated (Pearson correlation coefficient, PCC >= 0.4) with that of ATM [GeneID=472] across a compendium of normal tissues.	110	0.0763	3.45e-39	5.45e-36
DIAZ_CHRONIC_MEYLOGENOUS_LEUKEMIA_UP	1382	Genes up-regulated in CD34+ [GeneID=947] cells isolated from bone marrow of CML (chronic myelogenous leukemia) patients, compared to those from normal donors.	103	0.0745	8.35e-36	9.89e-33
PUJANA_BRCA1_PCC_NETWORK	1652	Genes constituting the BRCA1-PCC network of transcripts whose expression positively correlated (Pearson correlation coefficient, PCC >= 0.4) with that of BRCA1 [GeneID=672] across a compendium of normal tissues.	112	0.0678	3.49e-35	3.3e-32
BLALOCK_ALZHEIMERS_DISEASE_UP	1691	Genes up-regulated in brain from patients with Alzheimer's disease.	109	0.0645	2.56e-32	2.02e-29
GRAESSMANN_APOPTOSIS_BY_DOXORUBICIN_DN	1781	Genes down-regulated in ME-A cells (breast cancer) undergoing apoptosis in response to doxorubicin [PubChem=31703].	109	0.0612	2.18e-30	1.48e-27
REACTOME_IMMUNE_SYSTEM	933	Genes involved in Immune System	76	0.0815	5.84e-29	3.46e-26
NUYTTEN_EZH2_TARGETS_UP	1037	Genes up-regulated in PC3 cells (prostate cancer) after knockdown of EZH2 [GeneID=2146] by RNAi.	76	0.0733	4.76e-26	2.51e-23
SCHLOSSER_SERUM_RESPONSE_DN	712	Cluster 4: genes down-regulated in B493-6 cells (B lymphocytes) upon serum stimulation but not affected by MYC [GeneID=4609].	60	0.0843	8.54e-24	4.04e-21
FLECHNER_BIOPSY_KIDNEY_TRANSPLANT_OK_VS_DONOR_UP	555	Genes up-regulated in kidney biopsies from patients with well functioning kidneys more than 1-year post transplant compared to the biopsies from normal living kidney donors.	52	0.0937	7.74e-23	3.34e-20
CHEN_METABOLIC_SYNDROM_NETWORK	1210	Genes forming the macrophage-enriched metabolic network (MEMN) claimed to have a causal relationship with the metabolic syndrom traits.	77	0.0636	1.36e-22	5.37e-20
CUI_TCF21_TARGETS_2_DN	830	All significantly down-regulated genes in kidney glomeruli isolated from TCF21 [Gene ID=6943] knockout mice.	62	0.0747	7.83e-22	2.79e-19
RODRIGUES_THYROID_CARCINOMA_POORLY_DIFFERENTIATED_DN	805	Genes down-regulated in poorly differentiated thyroid carcinoma (PDTC) compared to normal thyroid tissue.	61	0.0758	8.25e-22	2.79e-19
KRIGE_RESPONSE_TO_TOSEDOSTAT_24HR_UP	783	Genes up-regulated in HL-60 cells (acute promyelocytic leukemia, APL) after treatment with the aminopeptidase inhibitor tosedostat (CHR-2797) [PubChem=15547703] for 24 h.	60	0.0766	1.04e-21	3.28e-19
ACEVEDO_LIVER_CANCER_UP	973	Genes up-regulated in hepatocellular carcinoma (HCC) compared to normal liver samples.	67	0.0689	1.37e-21	3.96e-19
MARSON_BOUND_BY_FOXP3_UNSTIMULATED	1229	Genes with promoters bound by FOXP3 [GeneID=50943] in unstimulated hybridoma cells.	76	0.0618	1.42e-21	3.96e-19
KUMAR_TARGETS_OF_MLL_AF9_FUSION	405	Myeloid leukemia model in mice with germ-line MLL-AF9 fusion knock-in [GeneID=4297;4300]: genes changed in comparison among the leukemic, preleukemic and wild-type animals.	43	0.1062	3.59e-21	9.45e-19
BLALOCK_ALZHEIMERS_DISEASE_DN	1237	Genes down-regulated in brain from patients with Alzheimer's disease.	75	0.0606	8.35e-21	2.08e-18
BENPORATH_NANOG_TARGETS	988	Set 'Nanog targets': genes upregulated and identified by ChIP on chip as Nanog [GeneID=79923] transcription factor targets in human embryonic stem cells.	66	0.0668	1.38e-20	3.27e-18
DACOSTA_UV_RESPONSE_VIA_ERCC3_COMMON_DN	483	Common down-regulated transcripts in fibroblasts expressing either XP/CS or TDD mutant forms of ERCC3 [GeneID=2071], after UVC irradiation.	45	0.0932	7.91e-20	1.79e-17
ONKEN_UVEAL_MELANOMA_UP	783	Genes up-regulated in uveal melanoma: class 2 vs class 1 tumors.	57	0.0728	1.24e-19	2.67e-17
KRIGE_RESPONSE_TO_TOSEDOSTAT_6HR_UP	953	Genes up-regulated in HL-60 cells (acute promyelocytic leukemia, APL) after treatment with the aminopeptidase inhibitor tosedostat (CHR-2797) [PubChem=15547703] for 6 h.	63	0.0661	1.81e-19	3.73e-17
KOINUMA_TARGETS_OF_SMAD2_OR_SMAD3	824	Genes with promoters occupied by SMAD2 or SMAD3 [GeneID=4087, 4088] in HaCaT cells (keratinocyte) according to a ChIP-chip analysis.	58	0.0704	2.85e-19	5.63e-17
DODD_NASOPHARYNGEAL_CARCINOMA_DN	1375	Genes down-regulated in nasopharyngeal carcinoma (NPC) compared to the normal tissue.	76	0.0553	9.06e-19	1.72e-16
OSMAN_BLADDER_CANCER_UP	404	Genes up-regulated in blood samples from bladder cancer patients.	40	0.099	1.07e-18	1.95e-16
MILI_PSEUDOPODIA_HAPTOTAXIS_UP	518	Transcripts enriched in pseudopodia of NIH/3T3 cells (fibroblast) in response to haptotactic migratory stimulus by fibronectin, FN1 [GeneID=2335].	45	0.0869	1.21e-18	2.12e-16
ACEVEDO_LIVER_TUMOR_VS_NORMAL_ADJACENT_TISSUE_UP	863	Genes up-regulated in liver tumor compared to the normal adjacent tissue.	58	0.0672	2.44e-18	4.14e-16
SPIELMAN_LYMPHOBLAST_EUROPEAN_VS_ASIAN_DN	584	Genes down-regulated in lymphoblastoid cells from the European population compared to those from the Asian population.	47	0.0805	4.31e-18	7.05e-16
ZHENG_BOUND_BY_FOXP3	491	Genes whose promoters are bound by FOXP3 [GeneID=50943] based an a ChIP-chip analysis.	43	0.0876	5.32e-18	8.4e-16
SHEN_SMARCA2_TARGETS_UP	424	Genes whose expression positively correlated with that of SMARCA2 [GeneID=6595] in prostate cancer samples.	40	0.0943	5.88e-18	8.99e-16
HADDAD_B_LYMPHOCYTE_PROGENITOR	293	Genes up-regulated in hematopoietic progenitor cells (HPC) of B lymphocyte lineage CD34+CD45RA+CD10+ [GeneID=947;5788;4311].	33	0.1126	2.53e-17	3.75e-15
GARY_CD5_TARGETS_UP	473	Genes up-regulated in Daudi cells (B lymphocytes) stably expressing CD5 [GeneID=921] off a plasmid vector.	41	0.0867	4.57e-17	6.57e-15
ENK_UV_RESPONSE_KERATINOCYTE_DN	485	Genes down-regulated in NHEK cells (normal epidermal keratinocytes) after UVB irradiation.	41	0.0845	1.1e-16	1.53e-14
LEE_DIFFERENTIATING_T_LYMPHOCYTE	200	Genes enriched at every T lymphocyte differentiation stage compared to the early passage fetal thymic stromal cultures (TSC).	27	0.135	2.09e-16	2.83e-14
DAZARD_RESPONSE_TO_UV_NHEK_DN	318	Genes down-regulated in NHEK cells (normal keratinocytes) by UV-B irradiation.	33	0.1038	2.93e-16	3.85e-14
MILI_PSEUDOPODIA_CHEMOTAXIS_DN	457	Transcripts depleted in pseudopodia of NIH/3T3 cells (fibroblast) in response to the chemotactic migration stimulus by lysophosphatidic acid (LPA) [PubChem=3988].	39	0.0853	4.52e-16	5.78e-14
LASTOWSKA_NEUROBLASTOMA_COPY_NUMBER_DN	800	Genes with copy number losses in primary neuroblastoma tumors.	52	0.065	5.77e-16	7.19e-14
JOHNSTONE_PARVB_TARGETS_3_DN	918	Genes down-regulated upon overexpression of PARVB [GeneID=29780] in MDA-MB-231 cells (breast cancer) cultured in 3D Matrigel only.	56	0.061	6.61e-16	8.03e-14
GRAESSMANN_APOPTOSIS_BY_DOXORUBICIN_UP	1142	Genes up-regulated in ME-A cells (breast cancer) undergoing apoptosis in response to doxorubicin [PubChem=31703].	63	0.0552	1.09e-15	1.27e-13
GOBERT_OLIGODENDROCYTE_DIFFERENTIATION_DN	1080	Genes down-regulated during differentiation of Oli-Neu cells (oligodendroglial precursor) in response to PD174265 [PubChem=4709].	61	0.0565	1.1e-15	1.27e-13
MARSON_BOUND_BY_FOXP3_STIMULATED	1022	Genes with promoters bound by FOXP3 [GeneID=50943] in hybridoma cells stimulated by PMA [PubChem=4792] and ionomycin [PubChem=3733].	59	0.0577	1.26e-15	1.42e-13
OSMAN_BLADDER_CANCER_DN	406	Genes down-regulated in blood samples from bladder cancer patients.	36	0.0887	1.88e-15	2.08e-13
NUYTTEN_NIPP1_TARGETS_UP	769	Genes up-regulated in PC3 cells (prostate cancer) after knockdown of NIPP1 [GeneID=5511] by RNAi.	50	0.065	2.1e-15	2.27e-13
ZWANG_TRANSIENTLY_UP_BY_1ST_EGF_PULSE_ONLY	1839	Genes transiently induced only by the first pulse of EGF [GeneID =1950] in 184A1 cells (mammary epithelium).	83	0.0451	2.86e-15	3.01e-13
PUJANA_CHEK2_PCC_NETWORK	779	Genes constituting the CHEK2-PCC network of transcripts whose expression positively correlates (Pearson correlation coefficient, PCC >= 0.4) with that of CHEK2 [GeneID=11200].	50	0.0642	3.49e-15	3.59e-13
LOPEZ_MBD_TARGETS	957	Genes up-regulated in HeLa cells (cervical cancer) after simultaneus knockdown of all three MBD (methyl-CpG binding domain) proteins MeCP2, MBD1 and MBD2 [GeneID=4204;4152;8932] by RNAi.	56	0.0585	3.88e-15	3.91e-13
BOCHKIS_FOXA2_TARGETS	425	Direct targets of FOXA2 [GeneID=3170] in liver, according to a ChIP-chip analysis.	36	0.0847	7.72e-15	7.62e-13
FISCHER_DREAM_TARGETS	929	Target genes of the DREAM complex.	54	0.0581	1.6e-14	1.55e-12
BUYTAERT_PHOTODYNAMIC_THERAPY_STRESS_UP	811	Genes up-regulated in T24 (bladder cancer) cells in response to the photodynamic therapy (PDT) stress.	50	0.0617	1.66e-14	1.57e-12
QI_PLASMACYTOMA_UP	259	Up-regulated genes that best disciminate plasmablastic plasmacytoma from plasmacytic plasmacytoma tumors.	28	0.1081	1.87e-14	1.74e-12
SCHAEFFER_PROSTATE_DEVELOPMENT_6HR_DN	514	Genes down-regulated in the urogenital sinus (UGS) of day E16 females exposed to the androgen dihydrotestosterone [PubChem=10635] for 6 h.	39	0.0759	2.12e-14	1.93e-12
GRYDER_PAX3FOXO1_ENHANCERS_IN_TADS	975	Expressed genes (FPKM>1) associated with high-confidence PAX3-FOXO1 sites with enhancers in primary tumors and cell lines, restricted to those within topological domain boundaries	55	0.0564	3.11e-14	2.78e-12
WANG_LMO4_TARGETS_DN	352	Genes down-regulated in MCF7 cells (breast cancer) engineered to conditionally express LMO4 [GeneID=8543] by a Tet Off system.	32	0.0909	3.48e-14	3.05e-12
TIEN_INTESTINE_PROBIOTICS_24HR_UP	557	Genes up-regulated in Caco-2 cells (intestinal epithelium) after coculture with the probiotic bacteria L. casei for 24h.	40	0.0718	5.91e-14	5.09e-12
RUTELLA_RESPONSE_TO_CSF2RB_AND_IL4_DN	315	Genes down-regulated in peripheral blood monocytes by CSF2RB (GM-CSF) and IL4 [GeneID=1437;3565].	30	0.0952	6.49e-14	5.49e-12
RUTELLA_RESPONSE_TO_HGF_VS_CSF2RB_AND_IL4_UP	408	Genes up-regulated in peripheral blood mononucleocytes by HGF [GeneID=3082] compared to those regulated by CSF2RB (GM-CSF) and IL4 [GeneID=1437;3565].	34	0.0833	6.95e-14	5.77e-12
OSWALD_HEMATOPOIETIC_STEM_CELL_IN_COLLAGEN_GEL_DN	275	Genes down-regulated in hematopoietic stem cells (HSC, CD34+ [GeneID=947]) cultured in a three-dimentional collagen gel compared to the cells grown in suspension.	28	0.1018	8.48e-14	6.92e-12
NUYTTEN_NIPP1_TARGETS_DN	848	Genes down-regulated in PC3 cells (prostate cancer) after knockdown of NIPP1 [GeneID=5511] by RNAi.	50	0.059	9.06e-14	7.28e-12
REACTOME_ADAPTIVE_IMMUNE_SYSTEM	539	Genes involved in Adaptive Immune System	39	0.0724	9.63e-14	7.61e-12
FULCHER_INFLAMMATORY_RESPONSE_LECTIN_VS_LPS_DN	463	Genes down-regulated in monocyte-derived dendritic cells (MDDC) after stimulation with galecin-1 (lectin, LGALS1) [GeneID=3956] compared to that with bacterial lipopolysaccharide (LPS).	36	0.0778	1.03e-13	8.02e-12
BENPORATH_SOX2_TARGETS	734	Set 'Sox2 targets': genes upregulated and identified by ChIP on chip as SOX2 [GeneID=6657] transcription factor targets in human embryonic stem cells.	46	0.0627	1.06e-13	8.14e-12
DANG_BOUND_BY_MYC	1103	Genes whose promoters are bound by MYC [GeneID=4609], according to MYC Target Gene Database.	58	0.0526	1.18e-13	8.9e-12
SMID_BREAST_CANCER_NORMAL_LIKE_UP	476	Genes up-regulated in the normal-like subtype of breast cancer.	36	0.0756	2.35e-13	1.74e-11
BONOME_OVARIAN_CANCER_SURVIVAL_SUBOPTIMAL_DEBULKING	510	Genes whose expression in suboptimally debulked ovarian tumors is associated with survival prognosis.	37	0.0725	3.85e-13	2.8e-11
FOSTER_TOLERANT_MACROPHAGE_DN	409	Class NT (non-tolerizeable) genes: induced during the first LPS stimulation and induced at equal or greater degree in tolerant macrophages.	33	0.0807	3.99e-13	2.86e-11
BRUINS_UVC_RESPONSE_LATE	1137	Late response genes: differentially expressed only 12 h after UV-C irradiation of MEF cells (embryonic fibroblast).	58	0.051	4.16e-13	2.94e-11
GRAESSMANN_RESPONSE_TO_MC_AND_SERUM_DEPRIVATION_UP	211	Genes up-regulated in ME-A cells (breast cancer, sensitive to apoptotic stimuli) upon serum deprivation for 22 hr in the presence of medium concentrate (MC) from ME-C cells (breast cancer, resistant to apoptotic stimuli).	24	0.1137	4.53e-13	3.15e-11
BOYLAN_MULTIPLE_MYELOMA_C_D_DN	252	Genes down-regulated both in group C and D of tumors arising from overexpression of BCL2L1 and MYC [GeneID=598;4609] in plasma cells.	26	0.1032	4.79e-13	3.29e-11
RUTELLA_RESPONSE_TO_HGF_DN	235	Genes down-regulated in peripheral blood monocytes by HGF [GeneID=3082].	25	0.1064	6.76e-13	4.57e-11
RODRIGUES_THYROID_CARCINOMA_POORLY_DIFFERENTIATED_UP	633	Genes up-regulated in poorly differentiated thyroid carcinoma (PDTC) compared to normal thyroid tissue.	41	0.0648	8.3e-13	5.54e-11
WANG_RESPONSE_TO_GSK3_INHIBITOR_SB216763_UP	397	Genes up-regulated in RS4;11 cells (MLL, mixed lineage leukemia) in response to SB216763 [PubChem=176158], an inhibitor of GSK3B [GeneID=2932].	32	0.0806	9.3e-13	6.12e-11
RODRIGUES_THYROID_CARCINOMA_ANAPLASTIC_UP	722	Genes up-regulated in anaplastic thyroid carcinoma (ATC) compared to normal thyroid tissue.	44	0.0609	9.5e-13	6.16e-11
PID_PDGFRB_PATHWAY	129	PDGFR-beta signaling pathway	19	0.1473	1.2e-12	7.67e-11
PEREZ_TP53_TARGETS	1174	Genes up-regulated in the HMEC cells (primary mammary epithelium) upon expression of TP53 [GeneID=7157] off adenoviral vector.	58	0.0494	1.53e-12	9.69e-11
JAATINEN_HEMATOPOIETIC_STEM_CELL_DN	226	Genes down-regulated in CD133+ [GeneID=8842] cells (hematopoietic stem cells, HSC) compared to the CD133- cells.	24	0.1062	2.02e-12	1.25e-10
BASAKI_YBX1_TARGETS_DN	384	Genes down-regulated in SKOC-3 cells (ovarian cancer) after YB-1 (YBX1) [GeneID=4904] knockdown by RNAi.	31	0.0807	2.03e-12	1.25e-10
SWEET_LUNG_CANCER_KRAS_UP	491	Genes up-regulated in the Kras2LA mouse lung cancer model with mutated KRAS [GeneID=3845].	35	0.0713	2.75e-12	1.66e-10
CHANG_CORE_SERUM_RESPONSE_DN	209	Down-regulated genes in the canonical gene expression signature of the fibroblast core serum response (CSR) defined by the Stanford group.	23	0.11	2.77e-12	1.66e-10
YOSHIMURA_MAPK8_TARGETS_DN	366	Genes down-regulated in vascular smooth muscle cells (VSMC) by MAPK8 (JNK1) [GeneID=5599].	30	0.082	3.13e-12	1.85e-10
GRADE_COLON_CANCER_UP	871	Up-regulated genes in colon carcinoma tumors compared to the matched normal mucosa samples.	48	0.0551	3.21e-12	1.88e-10
YAGI_AML_WITH_T_8_21_TRANSLOCATION	368	Genes specifically expressed in samples from patients with pediatric AML (acute myeloid leukemia ) bearing t(8;21) translocation.	30	0.0815	3.59e-12	2.08e-10
MONNIER_POSTRADIATION_TUMOR_ESCAPE_UP	393	The postradiation tumor escape signature: genes up-regulated in tumors from irradiated stroma vs those from non-irradiated stroma.	31	0.0789	3.69e-12	2.11e-10
FORTSCHEGGER_PHF8_TARGETS_DN	784	Genes down-regulated in HeLa cells (cervical carcinoma) upon knockdown of PHF8 [GeneID=23133] by RNAi.	45	0.0574	3.99e-12	2.25e-10
GRUETZMANN_PANCREATIC_CANCER_UP	358	Genes up-regulated in pancreatic ductal adenocarcinoma (PDAC) identified in a meta analysis across four independent studies.	29	0.081	9.6e-12	5.33e-10
REN_ALVEOLAR_RHABDOMYOSARCOMA_DN	408	Genes commonly down-regulated in human alveolar rhabdomyosarcoma (ARMS) and its mouse model overexpressing PAX3-FOXO1 [GeneID=5077;2308] fusion.	31	0.076	9.68e-12	5.33e-10
BAELDE_DIABETIC_NEPHROPATHY_DN	434	Genes down-regulated in glomeruli of kidneys from patients with diabetic nephropathy (type 2 diabetes mellitus).	32	0.0737	9.86e-12	5.37e-10
RODWELL_AGING_KIDNEY_UP	487	Genes whose expression increases with age in normal kidney.	34	0.0698	9.97e-12	5.37e-10
WONG_EMBRYONIC_STEM_CELL_CORE	335	The 'core ESC-like gene module': genes coordinately up-regulated in a compendium of mouse embryonic stem cells (ESC) which are shared with the human ESC-like module.	28	0.0836	1.04e-11	5.55e-10
CREIGHTON_ENDOCRINE_THERAPY_RESISTANCE_3	720	The 'group 3 set' of genes associated with acquired endocrine therapy resistance in breast tumors expressing ESR1 and ERBB2 [GeneID=2099;2064].	42	0.0583	1.26e-11	6.61e-10
DOUGLAS_BMI1_TARGETS_DN	314	Genes down-regulated in A4573 cells (Ewing's sarcoma, ESFT) after knockdown of BMI1 [GeneID=648] by RNAi.	27	0.086	1.27e-11	6.61e-10
MOHANKUMAR_TLX1_TARGETS_UP	414	Up-regulated in MCF7 cells (breast cancer) by TLX1 (HOX11) [GeneID=3195].	31	0.0749	1.4e-11	7.23e-10
REACTOME_CYTOKINE_SIGNALING_IN_IMMUNE_SYSTEM	270	Genes involved in Cytokine Signaling in Immune system	25	0.0926	1.47e-11	7.49e-10
KINSEY_TARGETS_OF_EWSR1_FLII_FUSION_UP	1278	Genes up-regulated in TC71 and EWS502 cells (Ewing's sarcoma) by EWSR1-FLI1 [GeneID=2130;2314] as inferred from RNAi knockdown of this fusion protein.	59	0.0462	1.51e-11	7.62e-10
GRAESSMANN_APOPTOSIS_BY_SERUM_DEPRIVATION_UP	552	Genes up-regulated in ME-A cells (breast cancer) undergoing apoptosis upon serum starvation (5% to 0% FCS) for 22 hr.	36	0.0652	1.71e-11	8.54e-10
ONKEN_UVEAL_MELANOMA_DN	526	Genes down-regulated in uveal melanoma: class 2 vs class 1 tumors.	35	0.0665	1.88e-11	9.3e-10
HAMAI_APOPTOSIS_VIA_TRAIL_UP	584	Genes up-regulated in T1 cells (primary melanoma, sensitive to TRAIL [GeneID=8743]) compared to G1 cells (metastatic melanoma, resistant to TRAIL).	37	0.0634	2.06e-11	1e-09
BOSCO_ALLERGEN_INDUCED_TH2_ASSOCIATED_MODULE	151	Genes representing a co-expression network in atopic CD4 [GeneID=920] T lymphocyte responses.	19	0.1258	2.07e-11	1e-09
WANG_TUMOR_INVASIVENESS_DN	210	Down-regulated genes in the subpopulation of invasive PyMT cells (breast cancer) compared to the general population of PyMT cells.	22	0.1048	2.2e-11	1.05e-09
MATSUDA_NATURAL_KILLER_DIFFERENTIATION	475	Genes changed between developmental stages of Valpha14i natural killer T lymphocyte cells (NKT).	33	0.0695	2.29e-11	1.08e-09
Gene/Gene Set Overlap Matrix
Entrez Gene Id	Gene Symbol	Gene Description	PILON_KLF1_TARGETS_DN	DACOSTA_UV_RESPONSE_VIA_ERCC3_DN	PUJANA_ATM_PCC_NETWORK	DIAZ_CHRONIC_MEYLOGENOUS_LEUKEMIA_UP	PUJANA_BRCA1_PCC_NETWORK	BLALOCK_ALZHEIMERS_DISEASE_UP	GRAESSMANN_APOPTOSIS_BY_DOXORUBICIN_DN	REACTOME_IMMUNE_SYSTEM	NUYTTEN_EZH2_TARGETS_UP	SCHLOSSER_SERUM_RESPONSE_DN	FLECHNER_BIOPSY_KIDNEY_TRANSPLANT_OK_VS_DONOR_UP	CHEN_METABOLIC_SYNDROM_NETWORK	CUI_TCF21_TARGETS_2_DN	RODRIGUES_THYROID_CARCINOMA_POORLY_DIFFERENTIATED_DN	KRIGE_RESPONSE_TO_TOSEDOSTAT_24HR_UP	ACEVEDO_LIVER_CANCER_UP	MARSON_BOUND_BY_FOXP3_UNSTIMULATED	KUMAR_TARGETS_OF_MLL_AF9_FUSION	BLALOCK_ALZHEIMERS_DISEASE_DN	BENPORATH_NANOG_TARGETS	DACOSTA_UV_RESPONSE_VIA_ERCC3_COMMON_DN	ONKEN_UVEAL_MELANOMA_UP	KRIGE_RESPONSE_TO_TOSEDOSTAT_6HR_UP	KOINUMA_TARGETS_OF_SMAD2_OR_SMAD3	DODD_NASOPHARYNGEAL_CARCINOMA_DN	OSMAN_BLADDER_CANCER_UP	MILI_PSEUDOPODIA_HAPTOTAXIS_UP	ACEVEDO_LIVER_TUMOR_VS_NORMAL_ADJACENT_TISSUE_UP	SPIELMAN_LYMPHOBLAST_EUROPEAN_VS_ASIAN_DN	ZHENG_BOUND_BY_FOXP3	SHEN_SMARCA2_TARGETS_UP	HADDAD_B_LYMPHOCYTE_PROGENITOR	GARY_CD5_TARGETS_UP	ENK_UV_RESPONSE_KERATINOCYTE_DN	LEE_DIFFERENTIATING_T_LYMPHOCYTE	DAZARD_RESPONSE_TO_UV_NHEK_DN	MILI_PSEUDOPODIA_CHEMOTAXIS_DN	LASTOWSKA_NEUROBLASTOMA_COPY_NUMBER_DN	JOHNSTONE_PARVB_TARGETS_3_DN	GRAESSMANN_APOPTOSIS_BY_DOXORUBICIN_UP	GOBERT_OLIGODENDROCYTE_DIFFERENTIATION_DN	MARSON_BOUND_BY_FOXP3_STIMULATED	OSMAN_BLADDER_CANCER_DN	NUYTTEN_NIPP1_TARGETS_UP	ZWANG_TRANSIENTLY_UP_BY_1ST_EGF_PULSE_ONLY	PUJANA_CHEK2_PCC_NETWORK	LOPEZ_MBD_TARGETS
6996	TDG	thymine-DNA glycosylase	PILON_KLF1_TARGETS_DN	DACOSTA_UV_RESPONSE_VIA_ERCC3_DN	PUJANA_ATM_PCC_NETWORK	DIAZ_CHRONIC_MEYLOGENOUS_LEUKEMIA_UP	PUJANA_BRCA1_PCC_NETWORK	BLALOCK_ALZHEIMERS_DISEASE_UP																ONKEN_UVEAL_MELANOMA_UP			DODD_NASOPHARYNGEAL_CARCINOMA_DN														JOHNSTONE_PARVB_TARGETS_3_DN						ZWANG_TRANSIENTLY_UP_BY_1ST_EGF_PULSE_ONLY	PUJANA_CHEK2_PCC_NETWORK
10006	ABI1	abl-interactor 1	PILON_KLF1_TARGETS_DN	DACOSTA_UV_RESPONSE_VIA_ERCC3_DN	PUJANA_ATM_PCC_NETWORK	DIAZ_CHRONIC_MEYLOGENOUS_LEUKEMIA_UP	PUJANA_BRCA1_PCC_NETWORK					SCHLOSSER_SERUM_RESPONSE_DN	FLECHNER_BIOPSY_KIDNEY_TRANSPLANT_OK_VS_DONOR_UP										DACOSTA_UV_RESPONSE_VIA_ERCC3_COMMON_DN										SHEN_SMARCA2_TARGETS_UP										GOBERT_OLIGODENDROCYTE_DIFFERENTIATION_DN
8520	HAT1	histone acetyltransferase 1	PILON_KLF1_TARGETS_DN	DACOSTA_UV_RESPONSE_VIA_ERCC3_DN	PUJANA_ATM_PCC_NETWORK	DIAZ_CHRONIC_MEYLOGENOUS_LEUKEMIA_UP	PUJANA_BRCA1_PCC_NETWORK					SCHLOSSER_SERUM_RESPONSE_DN	FLECHNER_BIOPSY_KIDNEY_TRANSPLANT_OK_VS_DONOR_UP																				SHEN_SMARCA2_TARGETS_UP															PUJANA_CHEK2_PCC_NETWORK
4436	MSH2	mutS homolog 2, colon cancer, nonpolyposis type 1 (E. coli)	PILON_KLF1_TARGETS_DN	DACOSTA_UV_RESPONSE_VIA_ERCC3_DN	PUJANA_ATM_PCC_NETWORK	DIAZ_CHRONIC_MEYLOGENOUS_LEUKEMIA_UP	PUJANA_BRCA1_PCC_NETWORK					SCHLOSSER_SERUM_RESPONSE_DN									BLALOCK_ALZHEIMERS_DISEASE_DN	BENPORATH_NANOG_TARGETS	DACOSTA_UV_RESPONSE_VIA_ERCC3_COMMON_DN				DODD_NASOPHARYNGEAL_CARCINOMA_DN														JOHNSTONE_PARVB_TARGETS_3_DN							PUJANA_CHEK2_PCC_NETWORK	LOPEZ_MBD_TARGETS
4790	NFKB1	nuclear factor of kappa light polypeptide gene enhancer in B-cells 1	PILON_KLF1_TARGETS_DN	DACOSTA_UV_RESPONSE_VIA_ERCC3_DN	PUJANA_ATM_PCC_NETWORK	DIAZ_CHRONIC_MEYLOGENOUS_LEUKEMIA_UP		BLALOCK_ALZHEIMERS_DISEASE_UP	GRAESSMANN_APOPTOSIS_BY_DOXORUBICIN_DN										MARSON_BOUND_BY_FOXP3_UNSTIMULATED							KOINUMA_TARGETS_OF_SMAD2_OR_SMAD3					SPIELMAN_LYMPHOBLAST_EUROPEAN_VS_ASIAN_DN							DAZARD_RESPONSE_TO_UV_NHEK_DN
5906	RAP1A	RAP1A, member of RAS oncogene family	PILON_KLF1_TARGETS_DN	DACOSTA_UV_RESPONSE_VIA_ERCC3_DN	PUJANA_ATM_PCC_NETWORK	DIAZ_CHRONIC_MEYLOGENOUS_LEUKEMIA_UP				REACTOME_IMMUNE_SYSTEM		SCHLOSSER_SERUM_RESPONSE_DN			CUI_TCF21_TARGETS_2_DN	RODRIGUES_THYROID_CARCINOMA_POORLY_DIFFERENTIATED_DN				KUMAR_TARGETS_OF_MLL_AF9_FUSION		BENPORATH_NANOG_TARGETS							MILI_PSEUDOPODIA_HAPTOTAXIS_UP			ZHENG_BOUND_BY_FOXP3												MARSON_BOUND_BY_FOXP3_STIMULATED					LOPEZ_MBD_TARGETS
23317	DNAJC13	DnaJ (Hsp40) homolog, subfamily C, member 13	PILON_KLF1_TARGETS_DN	DACOSTA_UV_RESPONSE_VIA_ERCC3_DN	PUJANA_ATM_PCC_NETWORK				GRAESSMANN_APOPTOSIS_BY_DOXORUBICIN_DN														DACOSTA_UV_RESPONSE_VIA_ERCC3_COMMON_DN	ONKEN_UVEAL_MELANOMA_UP
6683	SPAST	spastin	PILON_KLF1_TARGETS_DN	DACOSTA_UV_RESPONSE_VIA_ERCC3_DN	PUJANA_ATM_PCC_NETWORK																			ONKEN_UVEAL_MELANOMA_UP
4140	MARK3	MAP/microtubule affinity-regulating kinase 3	PILON_KLF1_TARGETS_DN	DACOSTA_UV_RESPONSE_VIA_ERCC3_DN		DIAZ_CHRONIC_MEYLOGENOUS_LEUKEMIA_UP		BLALOCK_ALZHEIMERS_DISEASE_UP								RODRIGUES_THYROID_CARCINOMA_POORLY_DIFFERENTIATED_DN							DACOSTA_UV_RESPONSE_VIA_ERCC3_COMMON_DN	ONKEN_UVEAL_MELANOMA_UP		KOINUMA_TARGETS_OF_SMAD2_OR_SMAD3										ENK_UV_RESPONSE_KERATINOCYTE_DN
7013	TERF1	telomeric repeat binding factor (NIMA-interacting) 1	PILON_KLF1_TARGETS_DN	DACOSTA_UV_RESPONSE_VIA_ERCC3_DN		DIAZ_CHRONIC_MEYLOGENOUS_LEUKEMIA_UP						SCHLOSSER_SERUM_RESPONSE_DN	FLECHNER_BIOPSY_KIDNEY_TRANSPLANT_OK_VS_DONOR_UP						MARSON_BOUND_BY_FOXP3_UNSTIMULATED			BENPORATH_NANOG_TARGETS		ONKEN_UVEAL_MELANOMA_UP												ENK_UV_RESPONSE_KERATINOCYTE_DN							GOBERT_OLIGODENDROCYTE_DIFFERENTIATION_DN
23613	ZMYND8	zinc finger, MYND-type containing 8	PILON_KLF1_TARGETS_DN	DACOSTA_UV_RESPONSE_VIA_ERCC3_DN		DIAZ_CHRONIC_MEYLOGENOUS_LEUKEMIA_UP																	DACOSTA_UV_RESPONSE_VIA_ERCC3_COMMON_DN	ONKEN_UVEAL_MELANOMA_UP		KOINUMA_TARGETS_OF_SMAD2_OR_SMAD3										ENK_UV_RESPONSE_KERATINOCYTE_DN		DAZARD_RESPONSE_TO_UV_NHEK_DN	MILI_PSEUDOPODIA_CHEMOTAXIS_DN				GOBERT_OLIGODENDROCYTE_DIFFERENTIATION_DN
7091	TLE4	transducin-like enhancer of split 4 (E(sp1) homolog, Drosophila)	PILON_KLF1_TARGETS_DN	DACOSTA_UV_RESPONSE_VIA_ERCC3_DN				BLALOCK_ALZHEIMERS_DISEASE_UP			NUYTTEN_EZH2_TARGETS_UP			CHEN_METABOLIC_SYNDROM_NETWORK	CUI_TCF21_TARGETS_2_DN								DACOSTA_UV_RESPONSE_VIA_ERCC3_COMMON_DN		KRIGE_RESPONSE_TO_TOSEDOSTAT_6HR_UP									HADDAD_B_LYMPHOCYTE_PROGENITOR				DAZARD_RESPONSE_TO_UV_NHEK_DN							OSMAN_BLADDER_CANCER_DN	NUYTTEN_NIPP1_TARGETS_UP
4299	AFF1	AF4/FMR2 family, member 1	PILON_KLF1_TARGETS_DN	DACOSTA_UV_RESPONSE_VIA_ERCC3_DN				BLALOCK_ALZHEIMERS_DISEASE_UP					FLECHNER_BIOPSY_KIDNEY_TRANSPLANT_OK_VS_DONOR_UP										DACOSTA_UV_RESPONSE_VIA_ERCC3_COMMON_DN													ENK_UV_RESPONSE_KERATINOCYTE_DN		DAZARD_RESPONSE_TO_UV_NHEK_DN
11214	AKAP13	A kinase (PRKA) anchor protein 13	PILON_KLF1_TARGETS_DN	DACOSTA_UV_RESPONSE_VIA_ERCC3_DN				BLALOCK_ALZHEIMERS_DISEASE_UP									KRIGE_RESPONSE_TO_TOSEDOSTAT_24HR_UP							ONKEN_UVEAL_MELANOMA_UP	KRIGE_RESPONSE_TO_TOSEDOSTAT_6HR_UP	KOINUMA_TARGETS_OF_SMAD2_OR_SMAD3		OSMAN_BLADDER_CANCER_UP				ZHENG_BOUND_BY_FOXP3			GARY_CD5_TARGETS_UP		LEE_DIFFERENTIATING_T_LYMPHOCYTE
23291	FBXW11	F-box and WD repeat domain containing 11	PILON_KLF1_TARGETS_DN	DACOSTA_UV_RESPONSE_VIA_ERCC3_DN					GRAESSMANN_APOPTOSIS_BY_DOXORUBICIN_DN	REACTOME_IMMUNE_SYSTEM		SCHLOSSER_SERUM_RESPONSE_DN										BENPORATH_NANOG_TARGETS	DACOSTA_UV_RESPONSE_VIA_ERCC3_COMMON_DN										SHEN_SMARCA2_TARGETS_UP
8672	EIF4G3	eukaryotic translation initiation factor 4 gamma, 3	PILON_KLF1_TARGETS_DN	DACOSTA_UV_RESPONSE_VIA_ERCC3_DN						REACTOME_IMMUNE_SYSTEM		SCHLOSSER_SERUM_RESPONSE_DN											DACOSTA_UV_RESPONSE_VIA_ERCC3_COMMON_DN	ONKEN_UVEAL_MELANOMA_UP																LASTOWSKA_NEUROBLASTOMA_COPY_NUMBER_DN									LOPEZ_MBD_TARGETS
1432	MAPK14	mitogen-activated protein kinase 14	PILON_KLF1_TARGETS_DN	DACOSTA_UV_RESPONSE_VIA_ERCC3_DN						REACTOME_IMMUNE_SYSTEM											BLALOCK_ALZHEIMERS_DISEASE_DN	BENPORATH_NANOG_TARGETS																	MILI_PSEUDOPODIA_CHEMOTAXIS_DN
23389	MED13L	mediator complex subunit 13-like	PILON_KLF1_TARGETS_DN	DACOSTA_UV_RESPONSE_VIA_ERCC3_DN												RODRIGUES_THYROID_CARCINOMA_POORLY_DIFFERENTIATED_DN							DACOSTA_UV_RESPONSE_VIA_ERCC3_COMMON_DN															DAZARD_RESPONSE_TO_UV_NHEK_DN
10184	LHFPL2	lipoma HMGIC fusion partner-like 2	PILON_KLF1_TARGETS_DN	DACOSTA_UV_RESPONSE_VIA_ERCC3_DN																			DACOSTA_UV_RESPONSE_VIA_ERCC3_COMMON_DN	ONKEN_UVEAL_MELANOMA_UP			DODD_NASOPHARYNGEAL_CARCINOMA_DN												MILI_PSEUDOPODIA_CHEMOTAXIS_DN				GOBERT_OLIGODENDROCYTE_DIFFERENTIATION_DN			NUYTTEN_NIPP1_TARGETS_UP
23332	CLASP1	cytoplasmic linker associated protein 1	PILON_KLF1_TARGETS_DN	DACOSTA_UV_RESPONSE_VIA_ERCC3_DN																			DACOSTA_UV_RESPONSE_VIA_ERCC3_COMMON_DN				DODD_NASOPHARYNGEAL_CARCINOMA_DN											DAZARD_RESPONSE_TO_UV_NHEK_DN
157680	VPS13B	vacuolar protein sorting 13 homolog B (yeast)	PILON_KLF1_TARGETS_DN	DACOSTA_UV_RESPONSE_VIA_ERCC3_DN																				ONKEN_UVEAL_MELANOMA_UP														DAZARD_RESPONSE_TO_UV_NHEK_DN								NUYTTEN_NIPP1_TARGETS_UP
7158	TP53BP1	tumor protein p53 binding protein 1	PILON_KLF1_TARGETS_DN	DACOSTA_UV_RESPONSE_VIA_ERCC3_DN																																ENK_UV_RESPONSE_KERATINOCYTE_DN
65123	INTS3	integrator complex subunit 3	PILON_KLF1_TARGETS_DN	DACOSTA_UV_RESPONSE_VIA_ERCC3_DN																																											ZWANG_TRANSIENTLY_UP_BY_1ST_EGF_PULSE_ONLY
6239	RREB1	ras responsive element binding protein 1	PILON_KLF1_TARGETS_DN		PUJANA_ATM_PCC_NETWORK	DIAZ_CHRONIC_MEYLOGENOUS_LEUKEMIA_UP	PUJANA_BRCA1_PCC_NETWORK	BLALOCK_ALZHEIMERS_DISEASE_UP	GRAESSMANN_APOPTOSIS_BY_DOXORUBICIN_DN						CUI_TCF21_TARGETS_2_DN																										JOHNSTONE_PARVB_TARGETS_3_DN						ZWANG_TRANSIENTLY_UP_BY_1ST_EGF_PULSE_ONLY
4087	SMAD2	SMAD family member 2	PILON_KLF1_TARGETS_DN		PUJANA_ATM_PCC_NETWORK	DIAZ_CHRONIC_MEYLOGENOUS_LEUKEMIA_UP	PUJANA_BRCA1_PCC_NETWORK	BLALOCK_ALZHEIMERS_DISEASE_UP																							SPIELMAN_LYMPHOBLAST_EUROPEAN_VS_ASIAN_DN		SHEN_SMARCA2_TARGETS_UP
11335	CBX3	chromobox homolog 3	PILON_KLF1_TARGETS_DN		PUJANA_ATM_PCC_NETWORK	DIAZ_CHRONIC_MEYLOGENOUS_LEUKEMIA_UP	PUJANA_BRCA1_PCC_NETWORK		GRAESSMANN_APOPTOSIS_BY_DOXORUBICIN_DN			SCHLOSSER_SERUM_RESPONSE_DN	FLECHNER_BIOPSY_KIDNEY_TRANSPLANT_OK_VS_DONOR_UP									BENPORATH_NANOG_TARGETS				KOINUMA_TARGETS_OF_SMAD2_OR_SMAD3	DODD_NASOPHARYNGEAL_CARCINOMA_DN									ENK_UV_RESPONSE_KERATINOCYTE_DN								MARSON_BOUND_BY_FOXP3_STIMULATED				PUJANA_CHEK2_PCC_NETWORK
3190	HNRNPK	heterogeneous nuclear ribonucleoprotein K	PILON_KLF1_TARGETS_DN		PUJANA_ATM_PCC_NETWORK	DIAZ_CHRONIC_MEYLOGENOUS_LEUKEMIA_UP	PUJANA_BRCA1_PCC_NETWORK		GRAESSMANN_APOPTOSIS_BY_DOXORUBICIN_DN				FLECHNER_BIOPSY_KIDNEY_TRANSPLANT_OK_VS_DONOR_UP								BLALOCK_ALZHEIMERS_DISEASE_DN					KOINUMA_TARGETS_OF_SMAD2_OR_SMAD3			MILI_PSEUDOPODIA_HAPTOTAXIS_UP
7570	ZNF22	zinc finger protein 22 (KOX 15)	PILON_KLF1_TARGETS_DN		PUJANA_ATM_PCC_NETWORK	DIAZ_CHRONIC_MEYLOGENOUS_LEUKEMIA_UP	PUJANA_BRCA1_PCC_NETWORK		GRAESSMANN_APOPTOSIS_BY_DOXORUBICIN_DN																						SPIELMAN_LYMPHOBLAST_EUROPEAN_VS_ASIAN_DN										JOHNSTONE_PARVB_TARGETS_3_DN							PUJANA_CHEK2_PCC_NETWORK
4116	MAGOH	mago-nashi homolog, proliferation-associated (Drosophila)	PILON_KLF1_TARGETS_DN		PUJANA_ATM_PCC_NETWORK	DIAZ_CHRONIC_MEYLOGENOUS_LEUKEMIA_UP	PUJANA_BRCA1_PCC_NETWORK					SCHLOSSER_SERUM_RESPONSE_DN																		ACEVEDO_LIVER_TUMOR_VS_NORMAL_ADJACENT_TISSUE_UP																		PUJANA_CHEK2_PCC_NETWORK
7555	CNBP	CCHC-type zinc finger, nucleic acid binding protein	PILON_KLF1_TARGETS_DN		PUJANA_ATM_PCC_NETWORK	DIAZ_CHRONIC_MEYLOGENOUS_LEUKEMIA_UP	PUJANA_BRCA1_PCC_NETWORK						FLECHNER_BIOPSY_KIDNEY_TRANSPLANT_OK_VS_DONOR_UP									BENPORATH_NANOG_TARGETS											SHEN_SMARCA2_TARGETS_UP															PUJANA_CHEK2_PCC_NETWORK	LOPEZ_MBD_TARGETS
9184	BUB3	budding uninhibited by benzimidazoles 3 homolog (yeast)	PILON_KLF1_TARGETS_DN		PUJANA_ATM_PCC_NETWORK	DIAZ_CHRONIC_MEYLOGENOUS_LEUKEMIA_UP	PUJANA_BRCA1_PCC_NETWORK															BENPORATH_NANOG_TARGETS					DODD_NASOPHARYNGEAL_CARCINOMA_DN						SHEN_SMARCA2_TARGETS_UP			ENK_UV_RESPONSE_KERATINOCYTE_DN				LASTOWSKA_NEUROBLASTOMA_COPY_NUMBER_DN	JOHNSTONE_PARVB_TARGETS_3_DN							PUJANA_CHEK2_PCC_NETWORK
6118	RPA2	replication protein A2, 32kDa	PILON_KLF1_TARGETS_DN		PUJANA_ATM_PCC_NETWORK	DIAZ_CHRONIC_MEYLOGENOUS_LEUKEMIA_UP	PUJANA_BRCA1_PCC_NETWORK																								SPIELMAN_LYMPHOBLAST_EUROPEAN_VS_ASIAN_DN									LASTOWSKA_NEUROBLASTOMA_COPY_NUMBER_DN	JOHNSTONE_PARVB_TARGETS_3_DN
5062	PAK2	p21 protein (Cdc42/Rac)-activated kinase 2	PILON_KLF1_TARGETS_DN		PUJANA_ATM_PCC_NETWORK		PUJANA_BRCA1_PCC_NETWORK	BLALOCK_ALZHEIMERS_DISEASE_UP		REACTOME_IMMUNE_SYSTEM		SCHLOSSER_SERUM_RESPONSE_DN
9527	GOSR1	golgi SNAP receptor complex member 1	PILON_KLF1_TARGETS_DN		PUJANA_ATM_PCC_NETWORK		PUJANA_BRCA1_PCC_NETWORK	BLALOCK_ALZHEIMERS_DISEASE_UP				SCHLOSSER_SERUM_RESPONSE_DN																								ENK_UV_RESPONSE_KERATINOCYTE_DN									OSMAN_BLADDER_CANCER_DN
54556	ING3	inhibitor of growth family, member 3	PILON_KLF1_TARGETS_DN		PUJANA_ATM_PCC_NETWORK		PUJANA_BRCA1_PCC_NETWORK	BLALOCK_ALZHEIMERS_DISEASE_UP							CUI_TCF21_TARGETS_2_DN				MARSON_BOUND_BY_FOXP3_UNSTIMULATED																		LEE_DIFFERENTIATING_T_LYMPHOCYTE				JOHNSTONE_PARVB_TARGETS_3_DN			MARSON_BOUND_BY_FOXP3_STIMULATED
5163	PDK1	pyruvate dehydrogenase kinase, isozyme 1	PILON_KLF1_TARGETS_DN		PUJANA_ATM_PCC_NETWORK		PUJANA_BRCA1_PCC_NETWORK		GRAESSMANN_APOPTOSIS_BY_DOXORUBICIN_DN		NUYTTEN_EZH2_TARGETS_UP								MARSON_BOUND_BY_FOXP3_UNSTIMULATED	KUMAR_TARGETS_OF_MLL_AF9_FUSION									MILI_PSEUDOPODIA_HAPTOTAXIS_UP						GARY_CD5_TARGETS_UP								GOBERT_OLIGODENDROCYTE_DIFFERENTIATION_DN	MARSON_BOUND_BY_FOXP3_STIMULATED		NUYTTEN_NIPP1_TARGETS_UP
3148	HMGB2	high mobility group box 2	PILON_KLF1_TARGETS_DN		PUJANA_ATM_PCC_NETWORK		PUJANA_BRCA1_PCC_NETWORK		GRAESSMANN_APOPTOSIS_BY_DOXORUBICIN_DN				FLECHNER_BIOPSY_KIDNEY_TRANSPLANT_OK_VS_DONOR_UP					ACEVEDO_LIVER_CANCER_UP						ONKEN_UVEAL_MELANOMA_UP			DODD_NASOPHARYNGEAL_CARCINOMA_DN			ACEVEDO_LIVER_TUMOR_VS_NORMAL_ADJACENT_TISSUE_UP				HADDAD_B_LYMPHOCYTE_PROGENITOR													ZWANG_TRANSIENTLY_UP_BY_1ST_EGF_PULSE_ONLY	PUJANA_CHEK2_PCC_NETWORK
6598	SMARCB1	SWI/SNF related, matrix associated, actin dependent regulator of chromatin, subfamily b, member 1	PILON_KLF1_TARGETS_DN		PUJANA_ATM_PCC_NETWORK		PUJANA_BRCA1_PCC_NETWORK		GRAESSMANN_APOPTOSIS_BY_DOXORUBICIN_DN																																							PUJANA_CHEK2_PCC_NETWORK
5293	PIK3CD	phosphoinositide-3-kinase, catalytic, delta polypeptide	PILON_KLF1_TARGETS_DN		PUJANA_ATM_PCC_NETWORK		PUJANA_BRCA1_PCC_NETWORK			REACTOME_IMMUNE_SYSTEM		SCHLOSSER_SERUM_RESPONSE_DN							MARSON_BOUND_BY_FOXP3_UNSTIMULATED															HADDAD_B_LYMPHOCYTE_PROGENITOR
1633	DCK	deoxycytidine kinase	PILON_KLF1_TARGETS_DN		PUJANA_ATM_PCC_NETWORK		PUJANA_BRCA1_PCC_NETWORK					SCHLOSSER_SERUM_RESPONSE_DN		CHEN_METABOLIC_SYNDROM_NETWORK					MARSON_BOUND_BY_FOXP3_UNSTIMULATED	KUMAR_TARGETS_OF_MLL_AF9_FUSION														HADDAD_B_LYMPHOCYTE_PROGENITOR														PUJANA_CHEK2_PCC_NETWORK
9695	EDEM1	ER degradation enhancer, mannosidase alpha-like 1	PILON_KLF1_TARGETS_DN		PUJANA_ATM_PCC_NETWORK		PUJANA_BRCA1_PCC_NETWORK					SCHLOSSER_SERUM_RESPONSE_DN					KRIGE_RESPONSE_TO_TOSEDOSTAT_24HR_UP		MARSON_BOUND_BY_FOXP3_UNSTIMULATED						KRIGE_RESPONSE_TO_TOSEDOSTAT_6HR_UP									HADDAD_B_LYMPHOCYTE_PROGENITOR						LASTOWSKA_NEUROBLASTOMA_COPY_NUMBER_DN		GRAESSMANN_APOPTOSIS_BY_DOXORUBICIN_UP		MARSON_BOUND_BY_FOXP3_STIMULATED
23451	SF3B1	splicing factor 3b, subunit 1, 155kDa	PILON_KLF1_TARGETS_DN		PUJANA_ATM_PCC_NETWORK		PUJANA_BRCA1_PCC_NETWORK					SCHLOSSER_SERUM_RESPONSE_DN										BENPORATH_NANOG_TARGETS						OSMAN_BLADDER_CANCER_UP	MILI_PSEUDOPODIA_HAPTOTAXIS_UP		SPIELMAN_LYMPHOBLAST_EUROPEAN_VS_ASIAN_DN
81688	C6orf62	chromosome 6 open reading frame 62	PILON_KLF1_TARGETS_DN		PUJANA_ATM_PCC_NETWORK		PUJANA_BRCA1_PCC_NETWORK							CHEN_METABOLIC_SYNDROM_NETWORK				ACEVEDO_LIVER_CANCER_UP												ACEVEDO_LIVER_TUMOR_VS_NORMAL_ADJACENT_TISSUE_UP				HADDAD_B_LYMPHOCYTE_PROGENITOR
2957	GTF2A1	general transcription factor IIA, 1, 19/37kDa	PILON_KLF1_TARGETS_DN		PUJANA_ATM_PCC_NETWORK		PUJANA_BRCA1_PCC_NETWORK								CUI_TCF21_TARGETS_2_DN																											GRAESSMANN_APOPTOSIS_BY_DOXORUBICIN_UP
6139	RPL17	ribosomal protein L17	PILON_KLF1_TARGETS_DN		PUJANA_ATM_PCC_NETWORK		PUJANA_BRCA1_PCC_NETWORK											ACEVEDO_LIVER_CANCER_UP				BENPORATH_NANOG_TARGETS		ONKEN_UVEAL_MELANOMA_UP					MILI_PSEUDOPODIA_HAPTOTAXIS_UP
10943	MSL3	male-specific lethal 3 homolog (Drosophila)	PILON_KLF1_TARGETS_DN		PUJANA_ATM_PCC_NETWORK		PUJANA_BRCA1_PCC_NETWORK															BENPORATH_NANOG_TARGETS
317781	DDX51	DEAD (Asp-Glu-Ala-Asp) box polypeptide 51	PILON_KLF1_TARGETS_DN		PUJANA_ATM_PCC_NETWORK		PUJANA_BRCA1_PCC_NETWORK																																									PUJANA_CHEK2_PCC_NETWORK
6772	STAT1	signal transducer and activator of transcription 1, 91kDa	PILON_KLF1_TARGETS_DN		PUJANA_ATM_PCC_NETWORK					REACTOME_IMMUNE_SYSTEM	NUYTTEN_EZH2_TARGETS_UP	SCHLOSSER_SERUM_RESPONSE_DN	FLECHNER_BIOPSY_KIDNEY_TRANSPLANT_OK_VS_DONOR_UP		CUI_TCF21_TARGETS_2_DN						BLALOCK_ALZHEIMERS_DISEASE_DN			ONKEN_UVEAL_MELANOMA_UP			DODD_NASOPHARYNGEAL_CARCINOMA_DN								GARY_CD5_TARGETS_UP							GRAESSMANN_APOPTOSIS_BY_DOXORUBICIN_UP	GOBERT_OLIGODENDROCYTE_DIFFERENTIATION_DN			NUYTTEN_NIPP1_TARGETS_UP
729230	CCR2	chemokine (C-C motif) receptor 2	PILON_KLF1_TARGETS_DN		PUJANA_ATM_PCC_NETWORK					REACTOME_IMMUNE_SYSTEM
23503	ZFYVE26	zinc finger, FYVE domain containing 26	PILON_KLF1_TARGETS_DN		PUJANA_ATM_PCC_NETWORK						NUYTTEN_EZH2_TARGETS_UP			CHEN_METABOLIC_SYNDROM_NETWORK				ACEVEDO_LIVER_CANCER_UP																												NUYTTEN_NIPP1_TARGETS_UP
9926	LPGAT1	lysophosphatidylglycerol acyltransferase 1	PILON_KLF1_TARGETS_DN		PUJANA_ATM_PCC_NETWORK							SCHLOSSER_SERUM_RESPONSE_DN	FLECHNER_BIOPSY_KIDNEY_TRANSPLANT_OK_VS_DONOR_UP					ACEVEDO_LIVER_CANCER_UP										OSMAN_BLADDER_CANCER_UP		ACEVEDO_LIVER_TUMOR_VS_NORMAL_ADJACENT_TISSUE_UP												GRAESSMANN_APOPTOSIS_BY_DOXORUBICIN_UP	GOBERT_OLIGODENDROCYTE_DIFFERENTIATION_DN
2120	ETV6	ets variant 6	PILON_KLF1_TARGETS_DN		PUJANA_ATM_PCC_NETWORK																						DODD_NASOPHARYNGEAL_CARCINOMA_DN																				ZWANG_TRANSIENTLY_UP_BY_1ST_EGF_PULSE_ONLY
8445	DYRK2	dual-specificity tyrosine-(Y)-phosphorylation regulated kinase 2	PILON_KLF1_TARGETS_DN		PUJANA_ATM_PCC_NETWORK																													HADDAD_B_LYMPHOCYTE_PROGENITOR		ENK_UV_RESPONSE_KERATINOCYTE_DN		DAZARD_RESPONSE_TO_UV_NHEK_DN
47	ACLY	ATP citrate lyase	PILON_KLF1_TARGETS_DN			DIAZ_CHRONIC_MEYLOGENOUS_LEUKEMIA_UP	PUJANA_BRCA1_PCC_NETWORK											ACEVEDO_LIVER_CANCER_UP						ONKEN_UVEAL_MELANOMA_UP						ACEVEDO_LIVER_TUMOR_VS_NORMAL_ADJACENT_TISSUE_UP					GARY_CD5_TARGETS_UP				MILI_PSEUDOPODIA_CHEMOTAXIS_DN									PUJANA_CHEK2_PCC_NETWORK
5037	PEBP1	phosphatidylethanolamine binding protein 1	PILON_KLF1_TARGETS_DN			DIAZ_CHRONIC_MEYLOGENOUS_LEUKEMIA_UP		BLALOCK_ALZHEIMERS_DISEASE_UP								RODRIGUES_THYROID_CARCINOMA_POORLY_DIFFERENTIATED_DN
9053	MAP7	microtubule-associated protein 7	PILON_KLF1_TARGETS_DN			DIAZ_CHRONIC_MEYLOGENOUS_LEUKEMIA_UP		BLALOCK_ALZHEIMERS_DISEASE_UP									KRIGE_RESPONSE_TO_TOSEDOSTAT_24HR_UP								KRIGE_RESPONSE_TO_TOSEDOSTAT_6HR_UP
7444	VRK2	vaccinia related kinase 2	PILON_KLF1_TARGETS_DN			DIAZ_CHRONIC_MEYLOGENOUS_LEUKEMIA_UP		BLALOCK_ALZHEIMERS_DISEASE_UP														BENPORATH_NANOG_TARGETS					DODD_NASOPHARYNGEAL_CARCINOMA_DN				SPIELMAN_LYMPHOBLAST_EUROPEAN_VS_ASIAN_DN										JOHNSTONE_PARVB_TARGETS_3_DN
8089	YEATS4	YEATS domain containing 4	PILON_KLF1_TARGETS_DN			DIAZ_CHRONIC_MEYLOGENOUS_LEUKEMIA_UP			GRAESSMANN_APOPTOSIS_BY_DOXORUBICIN_DN																			OSMAN_BLADDER_CANCER_UP
648	BMI1	BMI1 polycomb ring finger oncogene	PILON_KLF1_TARGETS_DN			DIAZ_CHRONIC_MEYLOGENOUS_LEUKEMIA_UP						SCHLOSSER_SERUM_RESPONSE_DN			CUI_TCF21_TARGETS_2_DN			ACEVEDO_LIVER_CANCER_UP											MILI_PSEUDOPODIA_HAPTOTAXIS_UP	ACEVEDO_LIVER_TUMOR_VS_NORMAL_ADJACENT_TISSUE_UP						ENK_UV_RESPONSE_KERATINOCYTE_DN					JOHNSTONE_PARVB_TARGETS_3_DN			MARSON_BOUND_BY_FOXP3_STIMULATED
1155	TBCB	tubulin folding cofactor B	PILON_KLF1_TARGETS_DN			DIAZ_CHRONIC_MEYLOGENOUS_LEUKEMIA_UP							FLECHNER_BIOPSY_KIDNEY_TRANSPLANT_OK_VS_DONOR_UP
55858	TMEM165	transmembrane protein 165	PILON_KLF1_TARGETS_DN			DIAZ_CHRONIC_MEYLOGENOUS_LEUKEMIA_UP								CHEN_METABOLIC_SYNDROM_NETWORK										ONKEN_UVEAL_MELANOMA_UP
29766	TMOD3	tropomodulin 3 (ubiquitous)	PILON_KLF1_TARGETS_DN			DIAZ_CHRONIC_MEYLOGENOUS_LEUKEMIA_UP									CUI_TCF21_TARGETS_2_DN				MARSON_BOUND_BY_FOXP3_UNSTIMULATED							KOINUMA_TARGETS_OF_SMAD2_OR_SMAD3		OSMAN_BLADDER_CANCER_UP																MARSON_BOUND_BY_FOXP3_STIMULATED
7360	UGP2	UDP-glucose pyrophosphorylase 2	PILON_KLF1_TARGETS_DN			DIAZ_CHRONIC_MEYLOGENOUS_LEUKEMIA_UP									CUI_TCF21_TARGETS_2_DN						BLALOCK_ALZHEIMERS_DISEASE_DN								MILI_PSEUDOPODIA_HAPTOTAXIS_UP		SPIELMAN_LYMPHOBLAST_EUROPEAN_VS_ASIAN_DN
56886	UGGT1	UDP-glucose glycoprotein glucosyltransferase 1	PILON_KLF1_TARGETS_DN			DIAZ_CHRONIC_MEYLOGENOUS_LEUKEMIA_UP											KRIGE_RESPONSE_TO_TOSEDOSTAT_24HR_UP								KRIGE_RESPONSE_TO_TOSEDOSTAT_6HR_UP																	GRAESSMANN_APOPTOSIS_BY_DOXORUBICIN_UP
10015	PDCD6IP	programmed cell death 6 interacting protein	PILON_KLF1_TARGETS_DN			DIAZ_CHRONIC_MEYLOGENOUS_LEUKEMIA_UP													MARSON_BOUND_BY_FOXP3_UNSTIMULATED																					LASTOWSKA_NEUROBLASTOMA_COPY_NUMBER_DN		GRAESSMANN_APOPTOSIS_BY_DOXORUBICIN_UP
2287	FKBP3	FK506 binding protein 3, 25kDa	PILON_KLF1_TARGETS_DN			DIAZ_CHRONIC_MEYLOGENOUS_LEUKEMIA_UP															BLALOCK_ALZHEIMERS_DISEASE_DN								MILI_PSEUDOPODIA_HAPTOTAXIS_UP
6760	SS18	synovial sarcoma translocation, chromosome 18	PILON_KLF1_TARGETS_DN			DIAZ_CHRONIC_MEYLOGENOUS_LEUKEMIA_UP																											SHEN_SMARCA2_TARGETS_UP
9218	VAPA	VAMP (vesicle-associated membrane protein)-associated protein A, 33kDa	PILON_KLF1_TARGETS_DN			DIAZ_CHRONIC_MEYLOGENOUS_LEUKEMIA_UP
1396	CRIP1	cysteine-rich protein 1 (intestinal)	PILON_KLF1_TARGETS_DN			DIAZ_CHRONIC_MEYLOGENOUS_LEUKEMIA_UP
164	AP1G1	adaptor-related protein complex 1, gamma 1 subunit	PILON_KLF1_TARGETS_DN				PUJANA_BRCA1_PCC_NETWORK		GRAESSMANN_APOPTOSIS_BY_DOXORUBICIN_DN	REACTOME_IMMUNE_SYSTEM												BENPORATH_NANOG_TARGETS																			JOHNSTONE_PARVB_TARGETS_3_DN
1861	TOR1A	torsin family 1, member A (torsin A)	PILON_KLF1_TARGETS_DN				PUJANA_BRCA1_PCC_NETWORK														BLALOCK_ALZHEIMERS_DISEASE_DN						DODD_NASOPHARYNGEAL_CARCINOMA_DN									ENK_UV_RESPONSE_KERATINOCYTE_DN
3052	HCCS	holocytochrome c synthase	PILON_KLF1_TARGETS_DN				PUJANA_BRCA1_PCC_NETWORK														BLALOCK_ALZHEIMERS_DISEASE_DN
10969	EBNA1BP2	EBNA1 binding protein 2	PILON_KLF1_TARGETS_DN				PUJANA_BRCA1_PCC_NETWORK																																	LASTOWSKA_NEUROBLASTOMA_COPY_NUMBER_DN	JOHNSTONE_PARVB_TARGETS_3_DN								LOPEZ_MBD_TARGETS
960	CD44	CD44 molecule (Indian blood group)	PILON_KLF1_TARGETS_DN					BLALOCK_ALZHEIMERS_DISEASE_UP	GRAESSMANN_APOPTOSIS_BY_DOXORUBICIN_DN	REACTOME_IMMUNE_SYSTEM	NUYTTEN_EZH2_TARGETS_UP		FLECHNER_BIOPSY_KIDNEY_TRANSPLANT_OK_VS_DONOR_UP	CHEN_METABOLIC_SYNDROM_NETWORK		RODRIGUES_THYROID_CARCINOMA_POORLY_DIFFERENTIATED_DN										KOINUMA_TARGETS_OF_SMAD2_OR_SMAD3		OSMAN_BLADDER_CANCER_UP				ZHENG_BOUND_BY_FOXP3				ENK_UV_RESPONSE_KERATINOCYTE_DN										NUYTTEN_NIPP1_TARGETS_UP
1656	DDX6	DEAD (Asp-Glu-Ala-Asp) box polypeptide 6	PILON_KLF1_TARGETS_DN					BLALOCK_ALZHEIMERS_DISEASE_UP	GRAESSMANN_APOPTOSIS_BY_DOXORUBICIN_DN
5256	PHKA2	phosphorylase kinase, alpha 2 (liver)	PILON_KLF1_TARGETS_DN					BLALOCK_ALZHEIMERS_DISEASE_UP	GRAESSMANN_APOPTOSIS_BY_DOXORUBICIN_DN
4170	MCL1	myeloid cell leukemia sequence 1 (BCL2-related)	PILON_KLF1_TARGETS_DN					BLALOCK_ALZHEIMERS_DISEASE_UP			NUYTTEN_EZH2_TARGETS_UP		FLECHNER_BIOPSY_KIDNEY_TRANSPLANT_OK_VS_DONOR_UP	CHEN_METABOLIC_SYNDROM_NETWORK	CUI_TCF21_TARGETS_2_DN		KRIGE_RESPONSE_TO_TOSEDOSTAT_24HR_UP								KRIGE_RESPONSE_TO_TOSEDOSTAT_6HR_UP	KOINUMA_TARGETS_OF_SMAD2_OR_SMAD3					SPIELMAN_LYMPHOBLAST_EUROPEAN_VS_ASIAN_DN					ENK_UV_RESPONSE_KERATINOCYTE_DN					JOHNSTONE_PARVB_TARGETS_3_DN	GRAESSMANN_APOPTOSIS_BY_DOXORUBICIN_UP		MARSON_BOUND_BY_FOXP3_STIMULATED
55114	ARHGAP17	Rho GTPase activating protein 17	PILON_KLF1_TARGETS_DN					BLALOCK_ALZHEIMERS_DISEASE_UP			NUYTTEN_EZH2_TARGETS_UP				CUI_TCF21_TARGETS_2_DN																								MILI_PSEUDOPODIA_CHEMOTAXIS_DN
3983	ABLIM1	actin binding LIM protein 1	PILON_KLF1_TARGETS_DN					BLALOCK_ALZHEIMERS_DISEASE_UP								RODRIGUES_THYROID_CARCINOMA_POORLY_DIFFERENTIATED_DN				KUMAR_TARGETS_OF_MLL_AF9_FUSION						KOINUMA_TARGETS_OF_SMAD2_OR_SMAD3						ZHENG_BOUND_BY_FOXP3											GOBERT_OLIGODENDROCYTE_DIFFERENTIATION_DN
64759	TNS3	tensin 3	PILON_KLF1_TARGETS_DN					BLALOCK_ALZHEIMERS_DISEASE_UP								RODRIGUES_THYROID_CARCINOMA_POORLY_DIFFERENTIATED_DN																															ZWANG_TRANSIENTLY_UP_BY_1ST_EGF_PULSE_ONLY
55743	CHFR	checkpoint with forkhead and ring finger domains	PILON_KLF1_TARGETS_DN					BLALOCK_ALZHEIMERS_DISEASE_UP									KRIGE_RESPONSE_TO_TOSEDOSTAT_24HR_UP								KRIGE_RESPONSE_TO_TOSEDOSTAT_6HR_UP
7009	TMBIM6	transmembrane BAX inhibitor motif containing 6	PILON_KLF1_TARGETS_DN					BLALOCK_ALZHEIMERS_DISEASE_UP													BLALOCK_ALZHEIMERS_DISEASE_DN										SPIELMAN_LYMPHOBLAST_EUROPEAN_VS_ASIAN_DN
26234	FBXL5	F-box and leucine-rich repeat protein 5	PILON_KLF1_TARGETS_DN					BLALOCK_ALZHEIMERS_DISEASE_UP																									SHEN_SMARCA2_TARGETS_UP								JOHNSTONE_PARVB_TARGETS_3_DN
23071	ERP44	endoplasmic reticulum protein 44	PILON_KLF1_TARGETS_DN					BLALOCK_ALZHEIMERS_DISEASE_UP
5295	PIK3R1	phosphoinositide-3-kinase, regulatory subunit 1 (alpha)	PILON_KLF1_TARGETS_DN						GRAESSMANN_APOPTOSIS_BY_DOXORUBICIN_DN	REACTOME_IMMUNE_SYSTEM																		OSMAN_BLADDER_CANCER_UP				ZHENG_BOUND_BY_FOXP3															ZWANG_TRANSIENTLY_UP_BY_1ST_EGF_PULSE_ONLY
9110	MTMR4	myotubularin related protein 4	PILON_KLF1_TARGETS_DN						GRAESSMANN_APOPTOSIS_BY_DOXORUBICIN_DN				FLECHNER_BIOPSY_KIDNEY_TRANSPLANT_OK_VS_DONOR_UP								BLALOCK_ALZHEIMERS_DISEASE_DN						DODD_NASOPHARYNGEAL_CARCINOMA_DN									ENK_UV_RESPONSE_KERATINOCYTE_DN							GOBERT_OLIGODENDROCYTE_DIFFERENTIATION_DN
27086	FOXP1	forkhead box P1	PILON_KLF1_TARGETS_DN						GRAESSMANN_APOPTOSIS_BY_DOXORUBICIN_DN					CHEN_METABOLIC_SYNDROM_NETWORK		RODRIGUES_THYROID_CARCINOMA_POORLY_DIFFERENTIATED_DN																ZHENG_BOUND_BY_FOXP3											GOBERT_OLIGODENDROCYTE_DIFFERENTIATION_DN
331	XIAP	X-linked inhibitor of apoptosis	PILON_KLF1_TARGETS_DN						GRAESSMANN_APOPTOSIS_BY_DOXORUBICIN_DN								KRIGE_RESPONSE_TO_TOSEDOSTAT_24HR_UP								KRIGE_RESPONSE_TO_TOSEDOSTAT_6HR_UP						SPIELMAN_LYMPHOBLAST_EUROPEAN_VS_ASIAN_DN
116461	TSEN15	tRNA splicing endonuclease 15 homolog (S. cerevisiae)	PILON_KLF1_TARGETS_DN						GRAESSMANN_APOPTOSIS_BY_DOXORUBICIN_DN									ACEVEDO_LIVER_CANCER_UP									DODD_NASOPHARYNGEAL_CARCINOMA_DN			ACEVEDO_LIVER_TUMOR_VS_NORMAL_ADJACENT_TISSUE_UP											JOHNSTONE_PARVB_TARGETS_3_DN
80314	EPC1	enhancer of polycomb homolog 1 (Drosophila)	PILON_KLF1_TARGETS_DN						GRAESSMANN_APOPTOSIS_BY_DOXORUBICIN_DN																																				OSMAN_BLADDER_CANCER_DN
8693	GALNT4	UDP-N-acetyl-alpha-D-galactosamine:polypeptide N-acetylgalactosaminyltransferase 4 (GalNAc-T4)	PILON_KLF1_TARGETS_DN						GRAESSMANN_APOPTOSIS_BY_DOXORUBICIN_DN
133522	PPARGC1B	peroxisome proliferator-activated receptor gamma, coactivator 1 beta	PILON_KLF1_TARGETS_DN						GRAESSMANN_APOPTOSIS_BY_DOXORUBICIN_DN
84062	DTNBP1	dystrobrevin binding protein 1	PILON_KLF1_TARGETS_DN						GRAESSMANN_APOPTOSIS_BY_DOXORUBICIN_DN
4615	MYD88	myeloid differentiation primary response gene (88)	PILON_KLF1_TARGETS_DN							REACTOME_IMMUNE_SYSTEM	NUYTTEN_EZH2_TARGETS_UP	SCHLOSSER_SERUM_RESPONSE_DN																			SPIELMAN_LYMPHOBLAST_EUROPEAN_VS_ASIAN_DN											GRAESSMANN_APOPTOSIS_BY_DOXORUBICIN_UP
7706	TRIM25	tripartite motif containing 25	PILON_KLF1_TARGETS_DN							REACTOME_IMMUNE_SYSTEM	NUYTTEN_EZH2_TARGETS_UP															KOINUMA_TARGETS_OF_SMAD2_OR_SMAD3
1536	CYBB	cytochrome b-245, beta polypeptide	PILON_KLF1_TARGETS_DN							REACTOME_IMMUNE_SYSTEM				CHEN_METABOLIC_SYNDROM_NETWORK	CUI_TCF21_TARGETS_2_DN		KRIGE_RESPONSE_TO_TOSEDOSTAT_24HR_UP								KRIGE_RESPONSE_TO_TOSEDOSTAT_6HR_UP			OSMAN_BLADDER_CANCER_UP
26273	FBXO3	F-box protein 3	PILON_KLF1_TARGETS_DN							REACTOME_IMMUNE_SYSTEM					CUI_TCF21_TARGETS_2_DN	RODRIGUES_THYROID_CARCINOMA_POORLY_DIFFERENTIATED_DN					BLALOCK_ALZHEIMERS_DISEASE_DN												SHEN_SMARCA2_TARGETS_UP
317649	EIF4E3	eukaryotic translation initiation factor 4E family member 3	PILON_KLF1_TARGETS_DN							REACTOME_IMMUNE_SYSTEM						RODRIGUES_THYROID_CARCINOMA_POORLY_DIFFERENTIATED_DN			MARSON_BOUND_BY_FOXP3_UNSTIMULATED																							GRAESSMANN_APOPTOSIS_BY_DOXORUBICIN_UP
54926	UBE2R2	ubiquitin-conjugating enzyme E2R 2	PILON_KLF1_TARGETS_DN							REACTOME_IMMUNE_SYSTEM									MARSON_BOUND_BY_FOXP3_UNSTIMULATED							KOINUMA_TARGETS_OF_SMAD2_OR_SMAD3									GARY_CD5_TARGETS_UP									MARSON_BOUND_BY_FOXP3_STIMULATED
7319	UBE2A	ubiquitin-conjugating enzyme E2A	PILON_KLF1_TARGETS_DN							REACTOME_IMMUNE_SYSTEM											BLALOCK_ALZHEIMERS_DISEASE_DN												SHEN_SMARCA2_TARGETS_UP																LOPEZ_MBD_TARGETS
51199	NIN	ninein (GSK3B interacting protein)	PILON_KLF1_TARGETS_DN								NUYTTEN_EZH2_TARGETS_UP			CHEN_METABOLIC_SYNDROM_NETWORK																																NUYTTEN_NIPP1_TARGETS_UP
51479	ANKFY1	ankyrin repeat and FYVE domain containing 1	PILON_KLF1_TARGETS_DN								NUYTTEN_EZH2_TARGETS_UP			CHEN_METABOLIC_SYNDROM_NETWORK
55608	ANKRD10	ankyrin repeat domain 10	PILON_KLF1_TARGETS_DN								NUYTTEN_EZH2_TARGETS_UP					RODRIGUES_THYROID_CARCINOMA_POORLY_DIFFERENTIATED_DN				KUMAR_TARGETS_OF_MLL_AF9_FUSION				ONKEN_UVEAL_MELANOMA_UP		KOINUMA_TARGETS_OF_SMAD2_OR_SMAD3								HADDAD_B_LYMPHOCYTE_PROGENITOR								GRAESSMANN_APOPTOSIS_BY_DOXORUBICIN_UP
10390	CEPT1	choline/ethanolamine phosphotransferase 1	PILON_KLF1_TARGETS_DN								NUYTTEN_EZH2_TARGETS_UP										BLALOCK_ALZHEIMERS_DISEASE_DN	BENPORATH_NANOG_TARGETS																			JOHNSTONE_PARVB_TARGETS_3_DN			MARSON_BOUND_BY_FOXP3_STIMULATED		NUYTTEN_NIPP1_TARGETS_UP
1230	CCR1	chemokine (C-C motif) receptor 1	PILON_KLF1_TARGETS_DN								NUYTTEN_EZH2_TARGETS_UP																DODD_NASOPHARYNGEAL_CARCINOMA_DN																	MARSON_BOUND_BY_FOXP3_STIMULATED			ZWANG_TRANSIENTLY_UP_BY_1ST_EGF_PULSE_ONLY
56882	CDC42SE1	CDC42 small effector 1	PILON_KLF1_TARGETS_DN								NUYTTEN_EZH2_TARGETS_UP																														JOHNSTONE_PARVB_TARGETS_3_DN
83666	PARP9	poly (ADP-ribose) polymerase family, member 9	PILON_KLF1_TARGETS_DN								NUYTTEN_EZH2_TARGETS_UP																																			NUYTTEN_NIPP1_TARGETS_UP	ZWANG_TRANSIENTLY_UP_BY_1ST_EGF_PULSE_ONLY
634	CEACAM1	carcinoembryonic antigen-related cell adhesion molecule 1 (biliary glycoprotein)	PILON_KLF1_TARGETS_DN								NUYTTEN_EZH2_TARGETS_UP
4126	MANBA	mannosidase, beta A, lysosomal	PILON_KLF1_TARGETS_DN									SCHLOSSER_SERUM_RESPONSE_DN		CHEN_METABOLIC_SYNDROM_NETWORK					MARSON_BOUND_BY_FOXP3_UNSTIMULATED
473	RERE	arginine-glutamic acid dipeptide (RE) repeats	PILON_KLF1_TARGETS_DN										FLECHNER_BIOPSY_KIDNEY_TRANSPLANT_OK_VS_DONOR_UP			RODRIGUES_THYROID_CARCINOMA_POORLY_DIFFERENTIATED_DN															SPIELMAN_LYMPHOBLAST_EUROPEAN_VS_ASIAN_DN									LASTOWSKA_NEUROBLASTOMA_COPY_NUMBER_DN					OSMAN_BLADDER_CANCER_DN
84187	TMEM164	transmembrane protein 164	PILON_KLF1_TARGETS_DN											CHEN_METABOLIC_SYNDROM_NETWORK		RODRIGUES_THYROID_CARCINOMA_POORLY_DIFFERENTIATED_DN			MARSON_BOUND_BY_FOXP3_UNSTIMULATED					ONKEN_UVEAL_MELANOMA_UP																				MARSON_BOUND_BY_FOXP3_STIMULATED
5791	PTPRE	protein tyrosine phosphatase, receptor type, E	PILON_KLF1_TARGETS_DN											CHEN_METABOLIC_SYNDROM_NETWORK			KRIGE_RESPONSE_TO_TOSEDOSTAT_24HR_UP				BLALOCK_ALZHEIMERS_DISEASE_DN				KRIGE_RESPONSE_TO_TOSEDOSTAT_6HR_UP						SPIELMAN_LYMPHOBLAST_EUROPEAN_VS_ASIAN_DN			HADDAD_B_LYMPHOCYTE_PROGENITOR									GOBERT_OLIGODENDROCYTE_DIFFERENTIATION_DN		OSMAN_BLADDER_CANCER_DN
136319	MTPN	myotrophin	PILON_KLF1_TARGETS_DN											CHEN_METABOLIC_SYNDROM_NETWORK				ACEVEDO_LIVER_CANCER_UP											MILI_PSEUDOPODIA_HAPTOTAXIS_UP												JOHNSTONE_PARVB_TARGETS_3_DN
83593	RASSF5	Ras association (RalGDS/AF-6) domain family member 5	PILON_KLF1_TARGETS_DN											CHEN_METABOLIC_SYNDROM_NETWORK												KOINUMA_TARGETS_OF_SMAD2_OR_SMAD3											LEE_DIFFERENTIATING_T_LYMPHOCYTE					GRAESSMANN_APOPTOSIS_BY_DOXORUBICIN_UP
89857	KLHL6	kelch-like 6 (Drosophila)	PILON_KLF1_TARGETS_DN											CHEN_METABOLIC_SYNDROM_NETWORK														OSMAN_BLADDER_CANCER_UP									LEE_DIFFERENTIATING_T_LYMPHOCYTE
55331	ACER3	alkaline ceramidase 3	PILON_KLF1_TARGETS_DN											CHEN_METABOLIC_SYNDROM_NETWORK														OSMAN_BLADDER_CANCER_UP
23191	CYFIP1	cytoplasmic FMR1 interacting protein 1	PILON_KLF1_TARGETS_DN											CHEN_METABOLIC_SYNDROM_NETWORK															MILI_PSEUDOPODIA_HAPTOTAXIS_UP
1820	ARID3A	AT rich interactive domain 3A (BRIGHT-like)	PILON_KLF1_TARGETS_DN											CHEN_METABOLIC_SYNDROM_NETWORK																								DAZARD_RESPONSE_TO_UV_NHEK_DN
54891	INO80D	INO80 complex subunit D	PILON_KLF1_TARGETS_DN												CUI_TCF21_TARGETS_2_DN	RODRIGUES_THYROID_CARCINOMA_POORLY_DIFFERENTIATED_DN												OSMAN_BLADDER_CANCER_UP
149371	EXOC8	exocyst complex component 8	PILON_KLF1_TARGETS_DN												CUI_TCF21_TARGETS_2_DN																											GRAESSMANN_APOPTOSIS_BY_DOXORUBICIN_UP					ZWANG_TRANSIENTLY_UP_BY_1ST_EGF_PULSE_ONLY
8754	ADAM9	ADAM metallopeptidase domain 9	PILON_KLF1_TARGETS_DN												CUI_TCF21_TARGETS_2_DN
55342	STRBP	spermatid perinuclear RNA binding protein	PILON_KLF1_TARGETS_DN													RODRIGUES_THYROID_CARCINOMA_POORLY_DIFFERENTIATED_DN		ACEVEDO_LIVER_CANCER_UP											MILI_PSEUDOPODIA_HAPTOTAXIS_UP																OSMAN_BLADDER_CANCER_DN
148867	SLC30A7	solute carrier family 30 (zinc transporter), member 7	PILON_KLF1_TARGETS_DN														KRIGE_RESPONSE_TO_TOSEDOSTAT_24HR_UP		MARSON_BOUND_BY_FOXP3_UNSTIMULATED			BENPORATH_NANOG_TARGETS			KRIGE_RESPONSE_TO_TOSEDOSTAT_6HR_UP	KOINUMA_TARGETS_OF_SMAD2_OR_SMAD3	DODD_NASOPHARYNGEAL_CARCINOMA_DN					ZHENG_BOUND_BY_FOXP3
100113407	TMEM170B	transmembrane protein 170B	PILON_KLF1_TARGETS_DN														KRIGE_RESPONSE_TO_TOSEDOSTAT_24HR_UP								KRIGE_RESPONSE_TO_TOSEDOSTAT_6HR_UP
4046	LSP1	lymphocyte-specific protein 1	PILON_KLF1_TARGETS_DN														KRIGE_RESPONSE_TO_TOSEDOSTAT_24HR_UP																		GARY_CD5_TARGETS_UP
84888	SPPL2A	signal peptide peptidase-like 2A	PILON_KLF1_TARGETS_DN															ACEVEDO_LIVER_CANCER_UP	MARSON_BOUND_BY_FOXP3_UNSTIMULATED																				MILI_PSEUDOPODIA_CHEMOTAXIS_DN
51808	PHAX	phosphorylated adaptor for RNA export	PILON_KLF1_TARGETS_DN															ACEVEDO_LIVER_CANCER_UP										OSMAN_BLADDER_CANCER_UP													JOHNSTONE_PARVB_TARGETS_3_DN
81619	TSPAN14	tetraspanin 14	PILON_KLF1_TARGETS_DN															ACEVEDO_LIVER_CANCER_UP												ACEVEDO_LIVER_TUMOR_VS_NORMAL_ADJACENT_TISSUE_UP				HADDAD_B_LYMPHOCYTE_PROGENITOR
84240	ZCCHC9	zinc finger, CCHC domain containing 9	PILON_KLF1_TARGETS_DN															ACEVEDO_LIVER_CANCER_UP												ACEVEDO_LIVER_TUMOR_VS_NORMAL_ADJACENT_TISSUE_UP																NUYTTEN_NIPP1_TARGETS_UP
9129	PRPF3	PRP3 pre-mRNA processing factor 3 homolog (S. cerevisiae)	PILON_KLF1_TARGETS_DN															ACEVEDO_LIVER_CANCER_UP																											OSMAN_BLADDER_CANCER_DN
115004	MB21D1	Mab-21 domain containing 1	PILON_KLF1_TARGETS_DN																MARSON_BOUND_BY_FOXP3_UNSTIMULATED										MILI_PSEUDOPODIA_HAPTOTAXIS_UP															MARSON_BOUND_BY_FOXP3_STIMULATED
64425	POLR1E	polymerase (RNA) I polypeptide E, 53kDa	PILON_KLF1_TARGETS_DN																MARSON_BOUND_BY_FOXP3_UNSTIMULATED																									MARSON_BOUND_BY_FOXP3_STIMULATED
27075	TSPAN13	tetraspanin 13	PILON_KLF1_TARGETS_DN																	KUMAR_TARGETS_OF_MLL_AF9_FUSION	BLALOCK_ALZHEIMERS_DISEASE_DN											ZHENG_BOUND_BY_FOXP3										GRAESSMANN_APOPTOSIS_BY_DOXORUBICIN_UP
143684	FAM76B	family with sequence similarity 76, member B	PILON_KLF1_TARGETS_DN																	KUMAR_TARGETS_OF_MLL_AF9_FUSION					KRIGE_RESPONSE_TO_TOSEDOSTAT_6HR_UP	KOINUMA_TARGETS_OF_SMAD2_OR_SMAD3						ZHENG_BOUND_BY_FOXP3								LASTOWSKA_NEUROBLASTOMA_COPY_NUMBER_DN	JOHNSTONE_PARVB_TARGETS_3_DN
55763	EXOC1	exocyst complex component 1	PILON_KLF1_TARGETS_DN																		BLALOCK_ALZHEIMERS_DISEASE_DN												SHEN_SMARCA2_TARGETS_UP
26017	FAM32A	family with sequence similarity 32, member A	PILON_KLF1_TARGETS_DN																		BLALOCK_ALZHEIMERS_DISEASE_DN																					GRAESSMANN_APOPTOSIS_BY_DOXORUBICIN_UP
51388	NIP7	nuclear import 7 homolog (S. cerevisiae)	PILON_KLF1_TARGETS_DN																			BENPORATH_NANOG_TARGETS																			JOHNSTONE_PARVB_TARGETS_3_DN	GRAESSMANN_APOPTOSIS_BY_DOXORUBICIN_UP
79877	DCAKD	dephospho-CoA kinase domain containing	PILON_KLF1_TARGETS_DN																			BENPORATH_NANOG_TARGETS
55288	RHOT1	ras homolog gene family, member T1	PILON_KLF1_TARGETS_DN																					ONKEN_UVEAL_MELANOMA_UP			DODD_NASOPHARYNGEAL_CARCINOMA_DN						SHEN_SMARCA2_TARGETS_UP								JOHNSTONE_PARVB_TARGETS_3_DN
311	ANXA11	annexin A11	PILON_KLF1_TARGETS_DN																					ONKEN_UVEAL_MELANOMA_UP							SPIELMAN_LYMPHOBLAST_EUROPEAN_VS_ASIAN_DN																		LOPEZ_MBD_TARGETS
9667	SAFB2	scaffold attachment factor B2	PILON_KLF1_TARGETS_DN																					ONKEN_UVEAL_MELANOMA_UP
55325	UFSP2	UFM1-specific peptidase 2	PILON_KLF1_TARGETS_DN																										MILI_PSEUDOPODIA_HAPTOTAXIS_UP				SHEN_SMARCA2_TARGETS_UP													NUYTTEN_NIPP1_TARGETS_UP
51535	PPHLN1	periphilin 1	PILON_KLF1_TARGETS_DN																										MILI_PSEUDOPODIA_HAPTOTAXIS_UP												JOHNSTONE_PARVB_TARGETS_3_DN				OSMAN_BLADDER_CANCER_DN				LOPEZ_MBD_TARGETS
9368	SLC9A3R1	solute carrier family 9 (sodium/hydrogen exchanger), member 3 regulator 1	PILON_KLF1_TARGETS_DN																																		LEE_DIFFERENTIATING_T_LYMPHOCYTE												LOPEZ_MBD_TARGETS
121536	AEBP2	AE binding protein 2	PILON_KLF1_TARGETS_DN																																						JOHNSTONE_PARVB_TARGETS_3_DN					NUYTTEN_NIPP1_TARGETS_UP
55486	PARL	presenilin associated, rhomboid-like	PILON_KLF1_TARGETS_DN																																						JOHNSTONE_PARVB_TARGETS_3_DN
342371	ATXN1L	ataxin 1-like	PILON_KLF1_TARGETS_DN																																						JOHNSTONE_PARVB_TARGETS_3_DN
339230	CCDC137	coiled-coil domain containing 137	PILON_KLF1_TARGETS_DN																																							GRAESSMANN_APOPTOSIS_BY_DOXORUBICIN_UP
401548	SNX30	sorting nexin family member 30	PILON_KLF1_TARGETS_DN																																								GOBERT_OLIGODENDROCYTE_DIFFERENTIATION_DN	MARSON_BOUND_BY_FOXP3_STIMULATED
55153	SDAD1	SDA1 domain containing 1	PILON_KLF1_TARGETS_DN																																											NUYTTEN_NIPP1_TARGETS_UP
59339	PLEKHA2	pleckstrin homology domain containing, family A (phosphoinositide binding specific) member 2	PILON_KLF1_TARGETS_DN																																												ZWANG_TRANSIENTLY_UP_BY_1ST_EGF_PULSE_ONLY
64282	PAPD5	PAP associated domain containing 5	PILON_KLF1_TARGETS_DN																																												ZWANG_TRANSIENTLY_UP_BY_1ST_EGF_PULSE_ONLY
79895	ATP8B4	ATPase, class I, type 8B, member 4	PILON_KLF1_TARGETS_DN
115825	WDFY2	WD repeat and FYVE domain containing 2	PILON_KLF1_TARGETS_DN
83440	ADPGK	ADP-dependent glucokinase	PILON_KLF1_TARGETS_DN
25816	TNFAIP8	tumor necrosis factor, alpha-induced protein 8		DACOSTA_UV_RESPONSE_VIA_ERCC3_DN	PUJANA_ATM_PCC_NETWORK	DIAZ_CHRONIC_MEYLOGENOUS_LEUKEMIA_UP	PUJANA_BRCA1_PCC_NETWORK	BLALOCK_ALZHEIMERS_DISEASE_UP			NUYTTEN_EZH2_TARGETS_UP			CHEN_METABOLIC_SYNDROM_NETWORK		RODRIGUES_THYROID_CARCINOMA_POORLY_DIFFERENTIATED_DN								ONKEN_UVEAL_MELANOMA_UP							SPIELMAN_LYMPHOBLAST_EUROPEAN_VS_ASIAN_DN						LEE_DIFFERENTIATING_T_LYMPHOCYTE	DAZARD_RESPONSE_TO_UV_NHEK_DN
51780	KDM3B	lysine (K)-specific demethylase 3B		DACOSTA_UV_RESPONSE_VIA_ERCC3_DN	PUJANA_ATM_PCC_NETWORK	DIAZ_CHRONIC_MEYLOGENOUS_LEUKEMIA_UP										RODRIGUES_THYROID_CARCINOMA_POORLY_DIFFERENTIATED_DN		ACEVEDO_LIVER_CANCER_UP															SHEN_SMARCA2_TARGETS_UP
6672	SP100	SP100 nuclear antigen		DACOSTA_UV_RESPONSE_VIA_ERCC3_DN	PUJANA_ATM_PCC_NETWORK		PUJANA_BRCA1_PCC_NETWORK	BLALOCK_ALZHEIMERS_DISEASE_UP		REACTOME_IMMUNE_SYSTEM	NUYTTEN_EZH2_TARGETS_UP	SCHLOSSER_SERUM_RESPONSE_DN		CHEN_METABOLIC_SYNDROM_NETWORK			KRIGE_RESPONSE_TO_TOSEDOSTAT_24HR_UP								KRIGE_RESPONSE_TO_TOSEDOSTAT_6HR_UP							ZHENG_BOUND_BY_FOXP3				ENK_UV_RESPONSE_KERATINOCYTE_DN						GRAESSMANN_APOPTOSIS_BY_DOXORUBICIN_UP				NUYTTEN_NIPP1_TARGETS_UP		PUJANA_CHEK2_PCC_NETWORK
7405	UVRAG	UV radiation resistance associated gene		DACOSTA_UV_RESPONSE_VIA_ERCC3_DN	PUJANA_ATM_PCC_NETWORK		PUJANA_BRCA1_PCC_NETWORK	BLALOCK_ALZHEIMERS_DISEASE_UP										ACEVEDO_LIVER_CANCER_UP	MARSON_BOUND_BY_FOXP3_UNSTIMULATED				DACOSTA_UV_RESPONSE_VIA_ERCC3_COMMON_DN										SHEN_SMARCA2_TARGETS_UP							LASTOWSKA_NEUROBLASTOMA_COPY_NUMBER_DN
23635	SSBP2	single-stranded DNA binding protein 2		DACOSTA_UV_RESPONSE_VIA_ERCC3_DN	PUJANA_ATM_PCC_NETWORK		PUJANA_BRCA1_PCC_NETWORK					SCHLOSSER_SERUM_RESPONSE_DN			CUI_TCF21_TARGETS_2_DN	RODRIGUES_THYROID_CARCINOMA_POORLY_DIFFERENTIATED_DN	KRIGE_RESPONSE_TO_TOSEDOSTAT_24HR_UP					BENPORATH_NANOG_TARGETS			KRIGE_RESPONSE_TO_TOSEDOSTAT_6HR_UP									HADDAD_B_LYMPHOCYTE_PROGENITOR				DAZARD_RESPONSE_TO_UV_NHEK_DN										PUJANA_CHEK2_PCC_NETWORK
26019	UPF2	UPF2 regulator of nonsense transcripts homolog (yeast)		DACOSTA_UV_RESPONSE_VIA_ERCC3_DN	PUJANA_ATM_PCC_NETWORK		PUJANA_BRCA1_PCC_NETWORK					SCHLOSSER_SERUM_RESPONSE_DN											DACOSTA_UV_RESPONSE_VIA_ERCC3_COMMON_DN										SHEN_SMARCA2_TARGETS_UP
9662	CEP135	centrosomal protein 135kDa		DACOSTA_UV_RESPONSE_VIA_ERCC3_DN	PUJANA_ATM_PCC_NETWORK		PUJANA_BRCA1_PCC_NETWORK																DACOSTA_UV_RESPONSE_VIA_ERCC3_COMMON_DN				DODD_NASOPHARYNGEAL_CARCINOMA_DN							HADDAD_B_LYMPHOCYTE_PROGENITOR													ZWANG_TRANSIENTLY_UP_BY_1ST_EGF_PULSE_ONLY
23240	KIAA0922	KIAA0922		DACOSTA_UV_RESPONSE_VIA_ERCC3_DN	PUJANA_ATM_PCC_NETWORK		PUJANA_BRCA1_PCC_NETWORK																											HADDAD_B_LYMPHOCYTE_PROGENITOR			LEE_DIFFERENTIATING_T_LYMPHOCYTE	DAZARD_RESPONSE_TO_UV_NHEK_DN										PUJANA_CHEK2_PCC_NETWORK
6093	ROCK1	Rho-associated, coiled-coil containing protein kinase 1		DACOSTA_UV_RESPONSE_VIA_ERCC3_DN	PUJANA_ATM_PCC_NETWORK			BLALOCK_ALZHEIMERS_DISEASE_UP	GRAESSMANN_APOPTOSIS_BY_DOXORUBICIN_DN				FLECHNER_BIOPSY_KIDNEY_TRANSPLANT_OK_VS_DONOR_UP		CUI_TCF21_TARGETS_2_DN														MILI_PSEUDOPODIA_HAPTOTAXIS_UP				SHEN_SMARCA2_TARGETS_UP
55023	PHIP	pleckstrin homology domain interacting protein		DACOSTA_UV_RESPONSE_VIA_ERCC3_DN	PUJANA_ATM_PCC_NETWORK				GRAESSMANN_APOPTOSIS_BY_DOXORUBICIN_DN									ACEVEDO_LIVER_CANCER_UP					DACOSTA_UV_RESPONSE_VIA_ERCC3_COMMON_DN															DAZARD_RESPONSE_TO_UV_NHEK_DN
51585	PCF11	PCF11, cleavage and polyadenylation factor subunit, homolog (S. cerevisiae)		DACOSTA_UV_RESPONSE_VIA_ERCC3_DN	PUJANA_ATM_PCC_NETWORK				GRAESSMANN_APOPTOSIS_BY_DOXORUBICIN_DN																											ENK_UV_RESPONSE_KERATINOCYTE_DN		DAZARD_RESPONSE_TO_UV_NHEK_DN		LASTOWSKA_NEUROBLASTOMA_COPY_NUMBER_DN							ZWANG_TRANSIENTLY_UP_BY_1ST_EGF_PULSE_ONLY
3796	KIF2A	kinesin heavy chain member 2A		DACOSTA_UV_RESPONSE_VIA_ERCC3_DN		DIAZ_CHRONIC_MEYLOGENOUS_LEUKEMIA_UP	PUJANA_BRCA1_PCC_NETWORK		GRAESSMANN_APOPTOSIS_BY_DOXORUBICIN_DN	REACTOME_IMMUNE_SYSTEM											BLALOCK_ALZHEIMERS_DISEASE_DN		DACOSTA_UV_RESPONSE_VIA_ERCC3_COMMON_DN						MILI_PSEUDOPODIA_HAPTOTAXIS_UP		SPIELMAN_LYMPHOBLAST_EUROPEAN_VS_ASIAN_DN					ENK_UV_RESPONSE_KERATINOCYTE_DN		DAZARD_RESPONSE_TO_UV_NHEK_DN			JOHNSTONE_PARVB_TARGETS_3_DN
4548	MTR	5-methyltetrahydrofolate-homocysteine methyltransferase		DACOSTA_UV_RESPONSE_VIA_ERCC3_DN		DIAZ_CHRONIC_MEYLOGENOUS_LEUKEMIA_UP	PUJANA_BRCA1_PCC_NETWORK																	ONKEN_UVEAL_MELANOMA_UP			DODD_NASOPHARYNGEAL_CARCINOMA_DN
9969	MED13	mediator complex subunit 13		DACOSTA_UV_RESPONSE_VIA_ERCC3_DN		DIAZ_CHRONIC_MEYLOGENOUS_LEUKEMIA_UP		BLALOCK_ALZHEIMERS_DISEASE_UP					FLECHNER_BIOPSY_KIDNEY_TRANSPLANT_OK_VS_DONOR_UP		CUI_TCF21_TARGETS_2_DN								DACOSTA_UV_RESPONSE_VIA_ERCC3_COMMON_DN																										LOPEZ_MBD_TARGETS
1452	CSNK1A1	casein kinase 1, alpha 1		DACOSTA_UV_RESPONSE_VIA_ERCC3_DN		DIAZ_CHRONIC_MEYLOGENOUS_LEUKEMIA_UP		BLALOCK_ALZHEIMERS_DISEASE_UP									KRIGE_RESPONSE_TO_TOSEDOSTAT_24HR_UP		MARSON_BOUND_BY_FOXP3_UNSTIMULATED	KUMAR_TARGETS_OF_MLL_AF9_FUSION					KRIGE_RESPONSE_TO_TOSEDOSTAT_6HR_UP			OSMAN_BLADDER_CANCER_UP			SPIELMAN_LYMPHOBLAST_EUROPEAN_VS_ASIAN_DN					ENK_UV_RESPONSE_KERATINOCYTE_DN					JOHNSTONE_PARVB_TARGETS_3_DN
2182	ACSL4	acyl-CoA synthetase long-chain family member 4		DACOSTA_UV_RESPONSE_VIA_ERCC3_DN		DIAZ_CHRONIC_MEYLOGENOUS_LEUKEMIA_UP			GRAESSMANN_APOPTOSIS_BY_DOXORUBICIN_DN			SCHLOSSER_SERUM_RESPONSE_DN	FLECHNER_BIOPSY_KIDNEY_TRANSPLANT_OK_VS_DONOR_UP		CUI_TCF21_TARGETS_2_DN				MARSON_BOUND_BY_FOXP3_UNSTIMULATED			BENPORATH_NANOG_TARGETS					DODD_NASOPHARYNGEAL_CARCINOMA_DN		MILI_PSEUDOPODIA_HAPTOTAXIS_UP															MARSON_BOUND_BY_FOXP3_STIMULATED
8502	PKP4	plakophilin 4		DACOSTA_UV_RESPONSE_VIA_ERCC3_DN		DIAZ_CHRONIC_MEYLOGENOUS_LEUKEMIA_UP			GRAESSMANN_APOPTOSIS_BY_DOXORUBICIN_DN			SCHLOSSER_SERUM_RESPONSE_DN								KUMAR_TARGETS_OF_MLL_AF9_FUSION			DACOSTA_UV_RESPONSE_VIA_ERCC3_COMMON_DN		KRIGE_RESPONSE_TO_TOSEDOSTAT_6HR_UP		DODD_NASOPHARYNGEAL_CARCINOMA_DN		MILI_PSEUDOPODIA_HAPTOTAXIS_UP				SHEN_SMARCA2_TARGETS_UP										GOBERT_OLIGODENDROCYTE_DIFFERENTIATION_DN
8476	CDC42BPA	CDC42 binding protein kinase alpha (DMPK-like)		DACOSTA_UV_RESPONSE_VIA_ERCC3_DN		DIAZ_CHRONIC_MEYLOGENOUS_LEUKEMIA_UP			GRAESSMANN_APOPTOSIS_BY_DOXORUBICIN_DN				FLECHNER_BIOPSY_KIDNEY_TRANSPLANT_OK_VS_DONOR_UP				KRIGE_RESPONSE_TO_TOSEDOSTAT_24HR_UP						DACOSTA_UV_RESPONSE_VIA_ERCC3_COMMON_DN	ONKEN_UVEAL_MELANOMA_UP	KRIGE_RESPONSE_TO_TOSEDOSTAT_6HR_UP																JOHNSTONE_PARVB_TARGETS_3_DN
5786	PTPRA	protein tyrosine phosphatase, receptor type, A		DACOSTA_UV_RESPONSE_VIA_ERCC3_DN		DIAZ_CHRONIC_MEYLOGENOUS_LEUKEMIA_UP			GRAESSMANN_APOPTOSIS_BY_DOXORUBICIN_DN														DACOSTA_UV_RESPONSE_VIA_ERCC3_COMMON_DN	ONKEN_UVEAL_MELANOMA_UP															MILI_PSEUDOPODIA_CHEMOTAXIS_DN
6197	RPS6KA3	ribosomal protein S6 kinase, 90kDa, polypeptide 3		DACOSTA_UV_RESPONSE_VIA_ERCC3_DN		DIAZ_CHRONIC_MEYLOGENOUS_LEUKEMIA_UP				REACTOME_IMMUNE_SYSTEM	NUYTTEN_EZH2_TARGETS_UP		FLECHNER_BIOPSY_KIDNEY_TRANSPLANT_OK_VS_DONOR_UP						MARSON_BOUND_BY_FOXP3_UNSTIMULATED										MILI_PSEUDOPODIA_HAPTOTAXIS_UP		SPIELMAN_LYMPHOBLAST_EUROPEAN_VS_ASIAN_DN
22920	KIFAP3	kinesin-associated protein 3		DACOSTA_UV_RESPONSE_VIA_ERCC3_DN		DIAZ_CHRONIC_MEYLOGENOUS_LEUKEMIA_UP				REACTOME_IMMUNE_SYSTEM		SCHLOSSER_SERUM_RESPONSE_DN						ACEVEDO_LIVER_CANCER_UP			BLALOCK_ALZHEIMERS_DISEASE_DN									ACEVEDO_LIVER_TUMOR_VS_NORMAL_ADJACENT_TISSUE_UP	SPIELMAN_LYMPHOBLAST_EUROPEAN_VS_ASIAN_DN		SHEN_SMARCA2_TARGETS_UP			ENK_UV_RESPONSE_KERATINOCYTE_DN
9320	TRIP12	thyroid hormone receptor interactor 12		DACOSTA_UV_RESPONSE_VIA_ERCC3_DN		DIAZ_CHRONIC_MEYLOGENOUS_LEUKEMIA_UP				REACTOME_IMMUNE_SYSTEM								ACEVEDO_LIVER_CANCER_UP					DACOSTA_UV_RESPONSE_VIA_ERCC3_COMMON_DN										SHEN_SMARCA2_TARGETS_UP			ENK_UV_RESPONSE_KERATINOCYTE_DN
1612	DAPK1	death-associated protein kinase 1		DACOSTA_UV_RESPONSE_VIA_ERCC3_DN		DIAZ_CHRONIC_MEYLOGENOUS_LEUKEMIA_UP																	DACOSTA_UV_RESPONSE_VIA_ERCC3_COMMON_DN	ONKEN_UVEAL_MELANOMA_UP																		GRAESSMANN_APOPTOSIS_BY_DOXORUBICIN_UP					ZWANG_TRANSIENTLY_UP_BY_1ST_EGF_PULSE_ONLY
4124	MAN2A1	mannosidase, alpha, class 2A, member 1		DACOSTA_UV_RESPONSE_VIA_ERCC3_DN		DIAZ_CHRONIC_MEYLOGENOUS_LEUKEMIA_UP																	DACOSTA_UV_RESPONSE_VIA_ERCC3_COMMON_DN					OSMAN_BLADDER_CANCER_UP			SPIELMAN_LYMPHOBLAST_EUROPEAN_VS_ASIAN_DN					ENK_UV_RESPONSE_KERATINOCYTE_DN					JOHNSTONE_PARVB_TARGETS_3_DN
9397	NMT2	N-myristoyltransferase 2		DACOSTA_UV_RESPONSE_VIA_ERCC3_DN		DIAZ_CHRONIC_MEYLOGENOUS_LEUKEMIA_UP																	DACOSTA_UV_RESPONSE_VIA_ERCC3_COMMON_DN								SPIELMAN_LYMPHOBLAST_EUROPEAN_VS_ASIAN_DN					ENK_UV_RESPONSE_KERATINOCYTE_DN									OSMAN_BLADDER_CANCER_DN
11011	TLK2	tousled-like kinase 2		DACOSTA_UV_RESPONSE_VIA_ERCC3_DN			PUJANA_BRCA1_PCC_NETWORK																DACOSTA_UV_RESPONSE_VIA_ERCC3_COMMON_DN						MILI_PSEUDOPODIA_HAPTOTAXIS_UP							ENK_UV_RESPONSE_KERATINOCYTE_DN		DAZARD_RESPONSE_TO_UV_NHEK_DN					GOBERT_OLIGODENDROCYTE_DIFFERENTIATION_DN
1387	CREBBP	CREB binding protein		DACOSTA_UV_RESPONSE_VIA_ERCC3_DN				BLALOCK_ALZHEIMERS_DISEASE_UP	GRAESSMANN_APOPTOSIS_BY_DOXORUBICIN_DN	REACTOME_IMMUNE_SYSTEM		SCHLOSSER_SERUM_RESPONSE_DN	FLECHNER_BIOPSY_KIDNEY_TRANSPLANT_OK_VS_DONOR_UP		CUI_TCF21_TARGETS_2_DN			ACEVEDO_LIVER_CANCER_UP					DACOSTA_UV_RESPONSE_VIA_ERCC3_COMMON_DN															DAZARD_RESPONSE_TO_UV_NHEK_DN											LOPEZ_MBD_TARGETS
463	ZFHX3	zinc finger homeobox 3		DACOSTA_UV_RESPONSE_VIA_ERCC3_DN				BLALOCK_ALZHEIMERS_DISEASE_UP	GRAESSMANN_APOPTOSIS_BY_DOXORUBICIN_DN		NUYTTEN_EZH2_TARGETS_UP					RODRIGUES_THYROID_CARCINOMA_POORLY_DIFFERENTIATED_DN																											GOBERT_OLIGODENDROCYTE_DIFFERENTIATION_DN
8609	KLF7	Kruppel-like factor 7 (ubiquitous)		DACOSTA_UV_RESPONSE_VIA_ERCC3_DN				BLALOCK_ALZHEIMERS_DISEASE_UP	GRAESSMANN_APOPTOSIS_BY_DOXORUBICIN_DN													BENPORATH_NANOG_TARGETS	DACOSTA_UV_RESPONSE_VIA_ERCC3_COMMON_DN			KOINUMA_TARGETS_OF_SMAD2_OR_SMAD3										ENK_UV_RESPONSE_KERATINOCYTE_DN		DAZARD_RESPONSE_TO_UV_NHEK_DN
351	APP	amyloid beta (A4) precursor protein		DACOSTA_UV_RESPONSE_VIA_ERCC3_DN				BLALOCK_ALZHEIMERS_DISEASE_UP		REACTOME_IMMUNE_SYSTEM	NUYTTEN_EZH2_TARGETS_UP										BLALOCK_ALZHEIMERS_DISEASE_DN			ONKEN_UVEAL_MELANOMA_UP															MILI_PSEUDOPODIA_CHEMOTAXIS_DN										LOPEZ_MBD_TARGETS
25957	PNISR	PNN-interacting serine/arginine-rich protein		DACOSTA_UV_RESPONSE_VIA_ERCC3_DN				BLALOCK_ALZHEIMERS_DISEASE_UP					FLECHNER_BIOPSY_KIDNEY_TRANSPLANT_OK_VS_DONOR_UP			RODRIGUES_THYROID_CARCINOMA_POORLY_DIFFERENTIATED_DN						BENPORATH_NANOG_TARGETS	DACOSTA_UV_RESPONSE_VIA_ERCC3_COMMON_DN	ONKEN_UVEAL_MELANOMA_UP				OSMAN_BLADDER_CANCER_UP						HADDAD_B_LYMPHOCYTE_PROGENITOR			LEE_DIFFERENTIATING_T_LYMPHOCYTE	DAZARD_RESPONSE_TO_UV_NHEK_DN					GOBERT_OLIGODENDROCYTE_DIFFERENTIATION_DN
7357	UGCG	UDP-glucose ceramide glucosyltransferase		DACOSTA_UV_RESPONSE_VIA_ERCC3_DN				BLALOCK_ALZHEIMERS_DISEASE_UP					FLECHNER_BIOPSY_KIDNEY_TRANSPLANT_OK_VS_DONOR_UP										DACOSTA_UV_RESPONSE_VIA_ERCC3_COMMON_DN					OSMAN_BLADDER_CANCER_UP						HADDAD_B_LYMPHOCYTE_PROGENITOR
9931	HELZ	helicase with zinc finger		DACOSTA_UV_RESPONSE_VIA_ERCC3_DN				BLALOCK_ALZHEIMERS_DISEASE_UP											MARSON_BOUND_BY_FOXP3_UNSTIMULATED				DACOSTA_UV_RESPONSE_VIA_ERCC3_COMMON_DN			KOINUMA_TARGETS_OF_SMAD2_OR_SMAD3												DAZARD_RESPONSE_TO_UV_NHEK_DN					GOBERT_OLIGODENDROCYTE_DIFFERENTIATION_DN
9759	HDAC4	histone deacetylase 4		DACOSTA_UV_RESPONSE_VIA_ERCC3_DN				BLALOCK_ALZHEIMERS_DISEASE_UP																ONKEN_UVEAL_MELANOMA_UP													LEE_DIFFERENTIATING_T_LYMPHOCYTE
4205	MEF2A	myocyte enhancer factor 2A		DACOSTA_UV_RESPONSE_VIA_ERCC3_DN					GRAESSMANN_APOPTOSIS_BY_DOXORUBICIN_DN	REACTOME_IMMUNE_SYSTEM		SCHLOSSER_SERUM_RESPONSE_DN					KRIGE_RESPONSE_TO_TOSEDOSTAT_24HR_UP		MARSON_BOUND_BY_FOXP3_UNSTIMULATED		BLALOCK_ALZHEIMERS_DISEASE_DN	BENPORATH_NANOG_TARGETS	DACOSTA_UV_RESPONSE_VIA_ERCC3_COMMON_DN		KRIGE_RESPONSE_TO_TOSEDOSTAT_6HR_UP	KOINUMA_TARGETS_OF_SMAD2_OR_SMAD3			MILI_PSEUDOPODIA_HAPTOTAXIS_UP					HADDAD_B_LYMPHOCYTE_PROGENITOR	GARY_CD5_TARGETS_UP
26509	MYOF	myoferlin		DACOSTA_UV_RESPONSE_VIA_ERCC3_DN					GRAESSMANN_APOPTOSIS_BY_DOXORUBICIN_DN			SCHLOSSER_SERUM_RESPONSE_DN	FLECHNER_BIOPSY_KIDNEY_TRANSPLANT_OK_VS_DONOR_UP	CHEN_METABOLIC_SYNDROM_NETWORK	CUI_TCF21_TARGETS_2_DN									ONKEN_UVEAL_MELANOMA_UP		KOINUMA_TARGETS_OF_SMAD2_OR_SMAD3
8204	NRIP1	nuclear receptor interacting protein 1		DACOSTA_UV_RESPONSE_VIA_ERCC3_DN					GRAESSMANN_APOPTOSIS_BY_DOXORUBICIN_DN				FLECHNER_BIOPSY_KIDNEY_TRANSPLANT_OK_VS_DONOR_UP								BLALOCK_ALZHEIMERS_DISEASE_DN		DACOSTA_UV_RESPONSE_VIA_ERCC3_COMMON_DN					OSMAN_BLADDER_CANCER_UP				ZHENG_BOUND_BY_FOXP3						DAZARD_RESPONSE_TO_UV_NHEK_DN						MARSON_BOUND_BY_FOXP3_STIMULATED
2650	GCNT1	glucosaminyl (N-acetyl) transferase 1, core 2		DACOSTA_UV_RESPONSE_VIA_ERCC3_DN					GRAESSMANN_APOPTOSIS_BY_DOXORUBICIN_DN					CHEN_METABOLIC_SYNDROM_NETWORK		RODRIGUES_THYROID_CARCINOMA_POORLY_DIFFERENTIATED_DN
26091	HERC4	hect domain and RLD 4		DACOSTA_UV_RESPONSE_VIA_ERCC3_DN					GRAESSMANN_APOPTOSIS_BY_DOXORUBICIN_DN										MARSON_BOUND_BY_FOXP3_UNSTIMULATED										MILI_PSEUDOPODIA_HAPTOTAXIS_UP											LASTOWSKA_NEUROBLASTOMA_COPY_NUMBER_DN				MARSON_BOUND_BY_FOXP3_STIMULATED			ZWANG_TRANSIENTLY_UP_BY_1ST_EGF_PULSE_ONLY
2131	EXT1	exostosin 1		DACOSTA_UV_RESPONSE_VIA_ERCC3_DN					GRAESSMANN_APOPTOSIS_BY_DOXORUBICIN_DN														DACOSTA_UV_RESPONSE_VIA_ERCC3_COMMON_DN	ONKEN_UVEAL_MELANOMA_UP		KOINUMA_TARGETS_OF_SMAD2_OR_SMAD3	DODD_NASOPHARYNGEAL_CARCINOMA_DN					ZHENG_BOUND_BY_FOXP3
8869	ST3GAL5	ST3 beta-galactoside alpha-2,3-sialyltransferase 5		DACOSTA_UV_RESPONSE_VIA_ERCC3_DN					GRAESSMANN_APOPTOSIS_BY_DOXORUBICIN_DN
4591	TRIM37	tripartite motif containing 37		DACOSTA_UV_RESPONSE_VIA_ERCC3_DN						REACTOME_IMMUNE_SYSTEM											BLALOCK_ALZHEIMERS_DISEASE_DN		DACOSTA_UV_RESPONSE_VIA_ERCC3_COMMON_DN
27347	STK39	serine threonine kinase 39		DACOSTA_UV_RESPONSE_VIA_ERCC3_DN							NUYTTEN_EZH2_TARGETS_UP						KRIGE_RESPONSE_TO_TOSEDOSTAT_24HR_UP			KUMAR_TARGETS_OF_MLL_AF9_FUSION			DACOSTA_UV_RESPONSE_VIA_ERCC3_COMMON_DN		KRIGE_RESPONSE_TO_TOSEDOSTAT_6HR_UP																						ZWANG_TRANSIENTLY_UP_BY_1ST_EGF_PULSE_ONLY
8553	BHLHE40	basic helix-loop-helix family, member e40		DACOSTA_UV_RESPONSE_VIA_ERCC3_DN							NUYTTEN_EZH2_TARGETS_UP										BLALOCK_ALZHEIMERS_DISEASE_DN		DACOSTA_UV_RESPONSE_VIA_ERCC3_COMMON_DN													ENK_UV_RESPONSE_KERATINOCYTE_DN							GOBERT_OLIGODENDROCYTE_DIFFERENTIATION_DN
23142	DCUN1D4	DCN1, defective in cullin neddylation 1, domain containing 4 (S. cerevisiae)		DACOSTA_UV_RESPONSE_VIA_ERCC3_DN							NUYTTEN_EZH2_TARGETS_UP												DACOSTA_UV_RESPONSE_VIA_ERCC3_COMMON_DN																							NUYTTEN_NIPP1_TARGETS_UP
26018	LRIG1	leucine-rich repeats and immunoglobulin-like domains 1		DACOSTA_UV_RESPONSE_VIA_ERCC3_DN								SCHLOSSER_SERUM_RESPONSE_DN		CHEN_METABOLIC_SYNDROM_NETWORK		RODRIGUES_THYROID_CARCINOMA_POORLY_DIFFERENTIATED_DN														ACEVEDO_LIVER_TUMOR_VS_NORMAL_ADJACENT_TISSUE_UP		ZHENG_BOUND_BY_FOXP3		HADDAD_B_LYMPHOCYTE_PROGENITOR									GOBERT_OLIGODENDROCYTE_DIFFERENTIATION_DN				ZWANG_TRANSIENTLY_UP_BY_1ST_EGF_PULSE_ONLY
9765	ZFYVE16	zinc finger, FYVE domain containing 16		DACOSTA_UV_RESPONSE_VIA_ERCC3_DN								SCHLOSSER_SERUM_RESPONSE_DN			CUI_TCF21_TARGETS_2_DN																			HADDAD_B_LYMPHOCYTE_PROGENITOR													ZWANG_TRANSIENTLY_UP_BY_1ST_EGF_PULSE_ONLY
23390	ZDHHC17	zinc finger, DHHC-type containing 17		DACOSTA_UV_RESPONSE_VIA_ERCC3_DN									FLECHNER_BIOPSY_KIDNEY_TRANSPLANT_OK_VS_DONOR_UP						MARSON_BOUND_BY_FOXP3_UNSTIMULATED				DACOSTA_UV_RESPONSE_VIA_ERCC3_COMMON_DN										SHEN_SMARCA2_TARGETS_UP
2181	ACSL3	acyl-CoA synthetase long-chain family member 3		DACOSTA_UV_RESPONSE_VIA_ERCC3_DN									FLECHNER_BIOPSY_KIDNEY_TRANSPLANT_OK_VS_DONOR_UP								BLALOCK_ALZHEIMERS_DISEASE_DN		DACOSTA_UV_RESPONSE_VIA_ERCC3_COMMON_DN													ENK_UV_RESPONSE_KERATINOCYTE_DN
64764	CREB3L2	cAMP responsive element binding protein 3-like 2		DACOSTA_UV_RESPONSE_VIA_ERCC3_DN									FLECHNER_BIOPSY_KIDNEY_TRANSPLANT_OK_VS_DONOR_UP										DACOSTA_UV_RESPONSE_VIA_ERCC3_COMMON_DN							ACEVEDO_LIVER_TUMOR_VS_NORMAL_ADJACENT_TISSUE_UP								DAZARD_RESPONSE_TO_UV_NHEK_DN
114882	OSBPL8	oxysterol binding protein-like 8		DACOSTA_UV_RESPONSE_VIA_ERCC3_DN										CHEN_METABOLIC_SYNDROM_NETWORK	CUI_TCF21_TARGETS_2_DN				MARSON_BOUND_BY_FOXP3_UNSTIMULATED				DACOSTA_UV_RESPONSE_VIA_ERCC3_COMMON_DN									ZHENG_BOUND_BY_FOXP3	SHEN_SMARCA2_TARGETS_UP											MARSON_BOUND_BY_FOXP3_STIMULATED
22936	ELL2	elongation factor, RNA polymerase II, 2		DACOSTA_UV_RESPONSE_VIA_ERCC3_DN											CUI_TCF21_TARGETS_2_DN	RODRIGUES_THYROID_CARCINOMA_POORLY_DIFFERENTIATED_DN				KUMAR_TARGETS_OF_MLL_AF9_FUSION		BENPORATH_NANOG_TARGETS				KOINUMA_TARGETS_OF_SMAD2_OR_SMAD3															JOHNSTONE_PARVB_TARGETS_3_DN					NUYTTEN_NIPP1_TARGETS_UP
3267	AGFG1	ArfGAP with FG repeats 1		DACOSTA_UV_RESPONSE_VIA_ERCC3_DN											CUI_TCF21_TARGETS_2_DN		KRIGE_RESPONSE_TO_TOSEDOSTAT_24HR_UP								KRIGE_RESPONSE_TO_TOSEDOSTAT_6HR_UP				MILI_PSEUDOPODIA_HAPTOTAXIS_UP					HADDAD_B_LYMPHOCYTE_PROGENITOR
4253	CTAGE5	CTAGE family, member 5		DACOSTA_UV_RESPONSE_VIA_ERCC3_DN												RODRIGUES_THYROID_CARCINOMA_POORLY_DIFFERENTIATED_DN	KRIGE_RESPONSE_TO_TOSEDOSTAT_24HR_UP								KRIGE_RESPONSE_TO_TOSEDOSTAT_6HR_UP											ENK_UV_RESPONSE_KERATINOCYTE_DN											ZWANG_TRANSIENTLY_UP_BY_1ST_EGF_PULSE_ONLY
23350	U2SURP	U2 snRNP-associated SURP domain containing		DACOSTA_UV_RESPONSE_VIA_ERCC3_DN												RODRIGUES_THYROID_CARCINOMA_POORLY_DIFFERENTIATED_DN							DACOSTA_UV_RESPONSE_VIA_ERCC3_COMMON_DN				DODD_NASOPHARYNGEAL_CARCINOMA_DN						SHEN_SMARCA2_TARGETS_UP								JOHNSTONE_PARVB_TARGETS_3_DN
54665	RSBN1	round spermatid basic protein 1		DACOSTA_UV_RESPONSE_VIA_ERCC3_DN												RODRIGUES_THYROID_CARCINOMA_POORLY_DIFFERENTIATED_DN												OSMAN_BLADDER_CANCER_UP					SHEN_SMARCA2_TARGETS_UP					DAZARD_RESPONSE_TO_UV_NHEK_DN
10443	N4BP2L2	NEDD4 binding protein 2-like 2		DACOSTA_UV_RESPONSE_VIA_ERCC3_DN													KRIGE_RESPONSE_TO_TOSEDOSTAT_24HR_UP								KRIGE_RESPONSE_TO_TOSEDOSTAT_6HR_UP									HADDAD_B_LYMPHOCYTE_PROGENITOR				DAZARD_RESPONSE_TO_UV_NHEK_DN			JOHNSTONE_PARVB_TARGETS_3_DN					NUYTTEN_NIPP1_TARGETS_UP
4092	SMAD7	SMAD family member 7		DACOSTA_UV_RESPONSE_VIA_ERCC3_DN															MARSON_BOUND_BY_FOXP3_UNSTIMULATED							KOINUMA_TARGETS_OF_SMAD2_OR_SMAD3		OSMAN_BLADDER_CANCER_UP										DAZARD_RESPONSE_TO_UV_NHEK_DN						MARSON_BOUND_BY_FOXP3_STIMULATED
23080	AVL9	AVL9 homolog (S. cerevisiase)		DACOSTA_UV_RESPONSE_VIA_ERCC3_DN																		BENPORATH_NANOG_TARGETS																									ZWANG_TRANSIENTLY_UP_BY_1ST_EGF_PULSE_ONLY
1000	CDH2	cadherin 2, type 1, N-cadherin (neuronal)		DACOSTA_UV_RESPONSE_VIA_ERCC3_DN																		BENPORATH_NANOG_TARGETS
2585	GALK2	galactokinase 2		DACOSTA_UV_RESPONSE_VIA_ERCC3_DN																		BENPORATH_NANOG_TARGETS
4289	MKLN1	muskelin 1, intracellular mediator containing kelch motifs		DACOSTA_UV_RESPONSE_VIA_ERCC3_DN																			DACOSTA_UV_RESPONSE_VIA_ERCC3_COMMON_DN				DODD_NASOPHARYNGEAL_CARCINOMA_DN				SPIELMAN_LYMPHOBLAST_EUROPEAN_VS_ASIAN_DN
26130	GAPVD1	GTPase activating protein and VPS9 domains 1		DACOSTA_UV_RESPONSE_VIA_ERCC3_DN																			DACOSTA_UV_RESPONSE_VIA_ERCC3_COMMON_DN															DAZARD_RESPONSE_TO_UV_NHEK_DN
222161	DKFZP586I1420	uncharacterized protein DKFZp586I1420		DACOSTA_UV_RESPONSE_VIA_ERCC3_DN																																	LEE_DIFFERENTIATING_T_LYMPHOCYTE
10001	MED6	mediator complex subunit 6			PUJANA_ATM_PCC_NETWORK	DIAZ_CHRONIC_MEYLOGENOUS_LEUKEMIA_UP	PUJANA_BRCA1_PCC_NETWORK	BLALOCK_ALZHEIMERS_DISEASE_UP				SCHLOSSER_SERUM_RESPONSE_DN				RODRIGUES_THYROID_CARCINOMA_POORLY_DIFFERENTIATED_DN					BLALOCK_ALZHEIMERS_DISEASE_DN								MILI_PSEUDOPODIA_HAPTOTAXIS_UP		SPIELMAN_LYMPHOBLAST_EUROPEAN_VS_ASIAN_DN																	PUJANA_CHEK2_PCC_NETWORK
5935	RBM3	RNA binding motif (RNP1, RRM) protein 3			PUJANA_ATM_PCC_NETWORK	DIAZ_CHRONIC_MEYLOGENOUS_LEUKEMIA_UP	PUJANA_BRCA1_PCC_NETWORK	BLALOCK_ALZHEIMERS_DISEASE_UP					FLECHNER_BIOPSY_KIDNEY_TRANSPLANT_OK_VS_DONOR_UP																		SPIELMAN_LYMPHOBLAST_EUROPEAN_VS_ASIAN_DN
11186	RASSF1	Ras association (RalGDS/AF-6) domain family member 1			PUJANA_ATM_PCC_NETWORK	DIAZ_CHRONIC_MEYLOGENOUS_LEUKEMIA_UP	PUJANA_BRCA1_PCC_NETWORK		GRAESSMANN_APOPTOSIS_BY_DOXORUBICIN_DN					CHEN_METABOLIC_SYNDROM_NETWORK
642	BLMH	bleomycin hydrolase			PUJANA_ATM_PCC_NETWORK	DIAZ_CHRONIC_MEYLOGENOUS_LEUKEMIA_UP	PUJANA_BRCA1_PCC_NETWORK			REACTOME_IMMUNE_SYSTEM																	DODD_NASOPHARYNGEAL_CARCINOMA_DN									ENK_UV_RESPONSE_KERATINOCYTE_DN												PUJANA_CHEK2_PCC_NETWORK
6917	TCEA1	transcription elongation factor A (SII), 1			PUJANA_ATM_PCC_NETWORK	DIAZ_CHRONIC_MEYLOGENOUS_LEUKEMIA_UP	PUJANA_BRCA1_PCC_NETWORK					SCHLOSSER_SERUM_RESPONSE_DN												ONKEN_UVEAL_MELANOMA_UP		KOINUMA_TARGETS_OF_SMAD2_OR_SMAD3			MILI_PSEUDOPODIA_HAPTOTAXIS_UP												JOHNSTONE_PARVB_TARGETS_3_DN							PUJANA_CHEK2_PCC_NETWORK	LOPEZ_MBD_TARGETS
399	RHOH	ras homolog gene family, member H			PUJANA_ATM_PCC_NETWORK	DIAZ_CHRONIC_MEYLOGENOUS_LEUKEMIA_UP	PUJANA_BRCA1_PCC_NETWORK							CHEN_METABOLIC_SYNDROM_NETWORK																	SPIELMAN_LYMPHOBLAST_EUROPEAN_VS_ASIAN_DN	ZHENG_BOUND_BY_FOXP3					LEE_DIFFERENTIATING_T_LYMPHOCYTE								OSMAN_BLADDER_CANCER_DN			PUJANA_CHEK2_PCC_NETWORK
2035	EPB41	erythrocyte membrane protein band 4.1 (elliptocytosis 1, RH-linked)			PUJANA_ATM_PCC_NETWORK	DIAZ_CHRONIC_MEYLOGENOUS_LEUKEMIA_UP	PUJANA_BRCA1_PCC_NETWORK							CHEN_METABOLIC_SYNDROM_NETWORK																		ZHENG_BOUND_BY_FOXP3					LEE_DIFFERENTIATING_T_LYMPHOCYTE			LASTOWSKA_NEUROBLASTOMA_COPY_NUMBER_DN								PUJANA_CHEK2_PCC_NETWORK
5631	PRPS1	phosphoribosyl pyrophosphate synthetase 1			PUJANA_ATM_PCC_NETWORK	DIAZ_CHRONIC_MEYLOGENOUS_LEUKEMIA_UP	PUJANA_BRCA1_PCC_NETWORK												MARSON_BOUND_BY_FOXP3_UNSTIMULATED		BLALOCK_ALZHEIMERS_DISEASE_DN										SPIELMAN_LYMPHOBLAST_EUROPEAN_VS_ASIAN_DN																	PUJANA_CHEK2_PCC_NETWORK
10094	ARPC3	actin related protein 2/3 complex, subunit 3, 21kDa			PUJANA_ATM_PCC_NETWORK	DIAZ_CHRONIC_MEYLOGENOUS_LEUKEMIA_UP	PUJANA_BRCA1_PCC_NETWORK														BLALOCK_ALZHEIMERS_DISEASE_DN																												LOPEZ_MBD_TARGETS
7693	ZNF134	zinc finger protein 134			PUJANA_ATM_PCC_NETWORK	DIAZ_CHRONIC_MEYLOGENOUS_LEUKEMIA_UP	PUJANA_BRCA1_PCC_NETWORK																																								ZWANG_TRANSIENTLY_UP_BY_1ST_EGF_PULSE_ONLY
56829	ZC3HAV1	zinc finger CCCH-type, antiviral 1			PUJANA_ATM_PCC_NETWORK		PUJANA_BRCA1_PCC_NETWORK	BLALOCK_ALZHEIMERS_DISEASE_UP	GRAESSMANN_APOPTOSIS_BY_DOXORUBICIN_DN		NUYTTEN_EZH2_TARGETS_UP				CUI_TCF21_TARGETS_2_DN				MARSON_BOUND_BY_FOXP3_UNSTIMULATED													ZHENG_BOUND_BY_FOXP3												MARSON_BOUND_BY_FOXP3_STIMULATED		NUYTTEN_NIPP1_TARGETS_UP
4149	MAX	MYC associated factor X			PUJANA_ATM_PCC_NETWORK		PUJANA_BRCA1_PCC_NETWORK	BLALOCK_ALZHEIMERS_DISEASE_UP			NUYTTEN_EZH2_TARGETS_UP																																						LOPEZ_MBD_TARGETS
8556	CDC14A	CDC14 cell division cycle 14 homolog A (S. cerevisiae)			PUJANA_ATM_PCC_NETWORK		PUJANA_BRCA1_PCC_NETWORK	BLALOCK_ALZHEIMERS_DISEASE_UP							CUI_TCF21_TARGETS_2_DN																															NUYTTEN_NIPP1_TARGETS_UP
23633	KPNA6	karyopherin alpha 6 (importin alpha 7)			PUJANA_ATM_PCC_NETWORK		PUJANA_BRCA1_PCC_NETWORK	BLALOCK_ALZHEIMERS_DISEASE_UP																				OSMAN_BLADDER_CANCER_UP												LASTOWSKA_NEUROBLASTOMA_COPY_NUMBER_DN
27043	PELP1	proline, glutamate and leucine rich protein 1			PUJANA_ATM_PCC_NETWORK		PUJANA_BRCA1_PCC_NETWORK	BLALOCK_ALZHEIMERS_DISEASE_UP																																								PUJANA_CHEK2_PCC_NETWORK
6146	RPL22	ribosomal protein L22			PUJANA_ATM_PCC_NETWORK		PUJANA_BRCA1_PCC_NETWORK		GRAESSMANN_APOPTOSIS_BY_DOXORUBICIN_DN				FLECHNER_BIOPSY_KIDNEY_TRANSPLANT_OK_VS_DONOR_UP														DODD_NASOPHARYNGEAL_CARCINOMA_DN																		OSMAN_BLADDER_CANCER_DN
120526	DNAJC24	DnaJ (Hsp40) homolog, subfamily C, member 24			PUJANA_ATM_PCC_NETWORK		PUJANA_BRCA1_PCC_NETWORK		GRAESSMANN_APOPTOSIS_BY_DOXORUBICIN_DN																																JOHNSTONE_PARVB_TARGETS_3_DN							PUJANA_CHEK2_PCC_NETWORK
57060	PCBP4	poly(rC) binding protein 4			PUJANA_ATM_PCC_NETWORK		PUJANA_BRCA1_PCC_NETWORK		GRAESSMANN_APOPTOSIS_BY_DOXORUBICIN_DN
9447	AIM2	absent in melanoma 2			PUJANA_ATM_PCC_NETWORK		PUJANA_BRCA1_PCC_NETWORK			REACTOME_IMMUNE_SYSTEM	NUYTTEN_EZH2_TARGETS_UP			CHEN_METABOLIC_SYNDROM_NETWORK																		ZHENG_BOUND_BY_FOXP3
973	CD79A	CD79a molecule, immunoglobulin-associated alpha			PUJANA_ATM_PCC_NETWORK		PUJANA_BRCA1_PCC_NETWORK			REACTOME_IMMUNE_SYSTEM										KUMAR_TARGETS_OF_MLL_AF9_FUSION														HADDAD_B_LYMPHOCYTE_PROGENITOR
10225	CD96	CD96 molecule			PUJANA_ATM_PCC_NETWORK		PUJANA_BRCA1_PCC_NETWORK			REACTOME_IMMUNE_SYSTEM																						ZHENG_BOUND_BY_FOXP3					LEE_DIFFERENTIATING_T_LYMPHOCYTE
5955	RCN2	reticulocalbin 2, EF-hand calcium binding domain			PUJANA_ATM_PCC_NETWORK		PUJANA_BRCA1_PCC_NETWORK				NUYTTEN_EZH2_TARGETS_UP	SCHLOSSER_SERUM_RESPONSE_DN						ACEVEDO_LIVER_CANCER_UP			BLALOCK_ALZHEIMERS_DISEASE_DN						DODD_NASOPHARYNGEAL_CARCINOMA_DN			ACEVEDO_LIVER_TUMOR_VS_NORMAL_ADJACENT_TISSUE_UP												GRAESSMANN_APOPTOSIS_BY_DOXORUBICIN_UP				NUYTTEN_NIPP1_TARGETS_UP		PUJANA_CHEK2_PCC_NETWORK
3939	LDHA	lactate dehydrogenase A			PUJANA_ATM_PCC_NETWORK		PUJANA_BRCA1_PCC_NETWORK				NUYTTEN_EZH2_TARGETS_UP										BLALOCK_ALZHEIMERS_DISEASE_DN						DODD_NASOPHARYNGEAL_CARCINOMA_DN	OSMAN_BLADDER_CANCER_UP																				PUJANA_CHEK2_PCC_NETWORK	LOPEZ_MBD_TARGETS
3181	HNRNPA2B1	heterogeneous nuclear ribonucleoprotein A2/B1			PUJANA_ATM_PCC_NETWORK		PUJANA_BRCA1_PCC_NETWORK					SCHLOSSER_SERUM_RESPONSE_DN	FLECHNER_BIOPSY_KIDNEY_TRANSPLANT_OK_VS_DONOR_UP							KUMAR_TARGETS_OF_MLL_AF9_FUSION		BENPORATH_NANOG_TARGETS				KOINUMA_TARGETS_OF_SMAD2_OR_SMAD3	DODD_NASOPHARYNGEAL_CARCINOMA_DN																					PUJANA_CHEK2_PCC_NETWORK
1933	EEF1B2	eukaryotic translation elongation factor 1 beta 2			PUJANA_ATM_PCC_NETWORK		PUJANA_BRCA1_PCC_NETWORK					SCHLOSSER_SERUM_RESPONSE_DN								KUMAR_TARGETS_OF_MLL_AF9_FUSION																									OSMAN_BLADDER_CANCER_DN			PUJANA_CHEK2_PCC_NETWORK
7073	TIAL1	TIA1 cytotoxic granule-associated RNA binding protein-like 1			PUJANA_ATM_PCC_NETWORK		PUJANA_BRCA1_PCC_NETWORK						FLECHNER_BIOPSY_KIDNEY_TRANSPLANT_OK_VS_DONOR_UP									BENPORATH_NANOG_TARGETS							MILI_PSEUDOPODIA_HAPTOTAXIS_UP															MARSON_BOUND_BY_FOXP3_STIMULATED
6147	RPL23A	ribosomal protein L23a			PUJANA_ATM_PCC_NETWORK		PUJANA_BRCA1_PCC_NETWORK											ACEVEDO_LIVER_CANCER_UP												ACEVEDO_LIVER_TUMOR_VS_NORMAL_ADJACENT_TISSUE_UP															OSMAN_BLADDER_CANCER_DN
167227	DCP2	DCP2 decapping enzyme homolog (S. cerevisiae)			PUJANA_ATM_PCC_NETWORK		PUJANA_BRCA1_PCC_NETWORK											ACEVEDO_LIVER_CANCER_UP															SHEN_SMARCA2_TARGETS_UP	HADDAD_B_LYMPHOCYTE_PROGENITOR														PUJANA_CHEK2_PCC_NETWORK
206358	SLC36A1	solute carrier family 36 (proton/amino acid symporter), member 1			PUJANA_ATM_PCC_NETWORK		PUJANA_BRCA1_PCC_NETWORK											ACEVEDO_LIVER_CANCER_UP																										MARSON_BOUND_BY_FOXP3_STIMULATED
2091	FBL	fibrillarin			PUJANA_ATM_PCC_NETWORK		PUJANA_BRCA1_PCC_NETWORK												MARSON_BOUND_BY_FOXP3_UNSTIMULATED						KRIGE_RESPONSE_TO_TOSEDOSTAT_6HR_UP		DODD_NASOPHARYNGEAL_CARCINOMA_DN																		OSMAN_BLADDER_CANCER_DN			PUJANA_CHEK2_PCC_NETWORK
2841	GPR18	G protein-coupled receptor 18			PUJANA_ATM_PCC_NETWORK		PUJANA_BRCA1_PCC_NETWORK												MARSON_BOUND_BY_FOXP3_UNSTIMULATED													ZHENG_BOUND_BY_FOXP3												MARSON_BOUND_BY_FOXP3_STIMULATED	OSMAN_BLADDER_CANCER_DN			PUJANA_CHEK2_PCC_NETWORK
27334	P2RY10	purinergic receptor P2Y, G-protein coupled, 10			PUJANA_ATM_PCC_NETWORK		PUJANA_BRCA1_PCC_NETWORK												MARSON_BOUND_BY_FOXP3_UNSTIMULATED													ZHENG_BOUND_BY_FOXP3												MARSON_BOUND_BY_FOXP3_STIMULATED
11184	MAP4K1	mitogen-activated protein kinase kinase kinase kinase 1			PUJANA_ATM_PCC_NETWORK		PUJANA_BRCA1_PCC_NETWORK												MARSON_BOUND_BY_FOXP3_UNSTIMULATED																GARY_CD5_TARGETS_UP		LEE_DIFFERENTIATING_T_LYMPHOCYTE
931	MS4A1	membrane-spanning 4-domains, subfamily A, member 1			PUJANA_ATM_PCC_NETWORK		PUJANA_BRCA1_PCC_NETWORK													KUMAR_TARGETS_OF_MLL_AF9_FUSION														HADDAD_B_LYMPHOCYTE_PROGENITOR
10598	AHSA1	AHA1, activator of heat shock 90kDa protein ATPase homolog 1 (yeast)			PUJANA_ATM_PCC_NETWORK		PUJANA_BRCA1_PCC_NETWORK														BLALOCK_ALZHEIMERS_DISEASE_DN	BENPORATH_NANOG_TARGETS																										PUJANA_CHEK2_PCC_NETWORK
8883	NAE1	NEDD8 activating enzyme E1 subunit 1			PUJANA_ATM_PCC_NETWORK		PUJANA_BRCA1_PCC_NETWORK														BLALOCK_ALZHEIMERS_DISEASE_DN								MILI_PSEUDOPODIA_HAPTOTAXIS_UP							ENK_UV_RESPONSE_KERATINOCYTE_DN					JOHNSTONE_PARVB_TARGETS_3_DN							PUJANA_CHEK2_PCC_NETWORK
23234	DNAJC9	DnaJ (Hsp40) homolog, subfamily C, member 9			PUJANA_ATM_PCC_NETWORK		PUJANA_BRCA1_PCC_NETWORK															BENPORATH_NANOG_TARGETS					DODD_NASOPHARYNGEAL_CARCINOMA_DN			ACEVEDO_LIVER_TUMOR_VS_NORMAL_ADJACENT_TISSUE_UP										LASTOWSKA_NEUROBLASTOMA_COPY_NUMBER_DN		GRAESSMANN_APOPTOSIS_BY_DOXORUBICIN_UP						PUJANA_CHEK2_PCC_NETWORK
11083	DIDO1	death inducer-obliterator 1			PUJANA_ATM_PCC_NETWORK		PUJANA_BRCA1_PCC_NETWORK															BENPORATH_NANOG_TARGETS																DAZARD_RESPONSE_TO_UV_NHEK_DN	MILI_PSEUDOPODIA_CHEMOTAXIS_DN						OSMAN_BLADDER_CANCER_DN		ZWANG_TRANSIENTLY_UP_BY_1ST_EGF_PULSE_ONLY
1743	DLST	dihydrolipoamide S-succinyltransferase (E2 component of 2-oxo-glutarate complex)			PUJANA_ATM_PCC_NETWORK		PUJANA_BRCA1_PCC_NETWORK																	ONKEN_UVEAL_MELANOMA_UP																								PUJANA_CHEK2_PCC_NETWORK
6210	RPS15A	ribosomal protein S15a			PUJANA_ATM_PCC_NETWORK		PUJANA_BRCA1_PCC_NETWORK																				DODD_NASOPHARYNGEAL_CARCINOMA_DN			ACEVEDO_LIVER_TUMOR_VS_NORMAL_ADJACENT_TISSUE_UP
4068	SH2D1A	SH2 domain containing 1A			PUJANA_ATM_PCC_NETWORK		PUJANA_BRCA1_PCC_NETWORK																									ZHENG_BOUND_BY_FOXP3					LEE_DIFFERENTIATING_T_LYMPHOCYTE								OSMAN_BLADDER_CANCER_DN			PUJANA_CHEK2_PCC_NETWORK
90410	IFT20	intraflagellar transport 20 homolog (Chlamydomonas)			PUJANA_ATM_PCC_NETWORK		PUJANA_BRCA1_PCC_NETWORK																																						OSMAN_BLADDER_CANCER_DN			PUJANA_CHEK2_PCC_NETWORK
25850	ZNF345	zinc finger protein 345			PUJANA_ATM_PCC_NETWORK		PUJANA_BRCA1_PCC_NETWORK
4520	MTF1	metal-regulatory transcription factor 1			PUJANA_ATM_PCC_NETWORK			BLALOCK_ALZHEIMERS_DISEASE_UP																						ACEVEDO_LIVER_TUMOR_VS_NORMAL_ADJACENT_TISSUE_UP										LASTOWSKA_NEUROBLASTOMA_COPY_NUMBER_DN							ZWANG_TRANSIENTLY_UP_BY_1ST_EGF_PULSE_ONLY
7799	PRDM2	PR domain containing 2, with ZNF domain			PUJANA_ATM_PCC_NETWORK			BLALOCK_ALZHEIMERS_DISEASE_UP																										HADDAD_B_LYMPHOCYTE_PROGENITOR						LASTOWSKA_NEUROBLASTOMA_COPY_NUMBER_DN									LOPEZ_MBD_TARGETS
10333	TLR6	toll-like receptor 6			PUJANA_ATM_PCC_NETWORK				GRAESSMANN_APOPTOSIS_BY_DOXORUBICIN_DN	REACTOME_IMMUNE_SYSTEM																						ZHENG_BOUND_BY_FOXP3
1654	DDX3X	DEAD (Asp-Glu-Ala-Asp) box polypeptide 3, X-linked			PUJANA_ATM_PCC_NETWORK				GRAESSMANN_APOPTOSIS_BY_DOXORUBICIN_DN				FLECHNER_BIOPSY_KIDNEY_TRANSPLANT_OK_VS_DONOR_UP																																				LOPEZ_MBD_TARGETS
3717	JAK2	Janus kinase 2			PUJANA_ATM_PCC_NETWORK					REACTOME_IMMUNE_SYSTEM	NUYTTEN_EZH2_TARGETS_UP								MARSON_BOUND_BY_FOXP3_UNSTIMULATED		BLALOCK_ALZHEIMERS_DISEASE_DN																						GOBERT_OLIGODENDROCYTE_DIFFERENTIATION_DN	MARSON_BOUND_BY_FOXP3_STIMULATED
103	ADAR	adenosine deaminase, RNA-specific			PUJANA_ATM_PCC_NETWORK					REACTOME_IMMUNE_SYSTEM	NUYTTEN_EZH2_TARGETS_UP									KUMAR_TARGETS_OF_MLL_AF9_FUSION		BENPORATH_NANOG_TARGETS					DODD_NASOPHARYNGEAL_CARCINOMA_DN												MILI_PSEUDOPODIA_CHEMOTAXIS_DN
10125	RASGRP1	RAS guanyl releasing protein 1 (calcium and DAG-regulated)			PUJANA_ATM_PCC_NETWORK					REACTOME_IMMUNE_SYSTEM		SCHLOSSER_SERUM_RESPONSE_DN																						HADDAD_B_LYMPHOCYTE_PROGENITOR			LEE_DIFFERENTIATING_T_LYMPHOCYTE
29851	ICOS	inducible T-cell co-stimulator			PUJANA_ATM_PCC_NETWORK					REACTOME_IMMUNE_SYSTEM										KUMAR_TARGETS_OF_MLL_AF9_FUSION												ZHENG_BOUND_BY_FOXP3					LEE_DIFFERENTIATING_T_LYMPHOCYTE
919	CD247	CD247 molecule			PUJANA_ATM_PCC_NETWORK					REACTOME_IMMUNE_SYSTEM																											LEE_DIFFERENTIATING_T_LYMPHOCYTE
5720	PSME1	proteasome (prosome, macropain) activator subunit 1 (PA28 alpha)			PUJANA_ATM_PCC_NETWORK					REACTOME_IMMUNE_SYSTEM
5027	P2RX7	purinergic receptor P2X, ligand-gated ion channel, 7			PUJANA_ATM_PCC_NETWORK					REACTOME_IMMUNE_SYSTEM
2882	GPX7	glutathione peroxidase 7			PUJANA_ATM_PCC_NETWORK									CHEN_METABOLIC_SYNDROM_NETWORK				ACEVEDO_LIVER_CANCER_UP
7582	ZNF33B	zinc finger protein 33B			PUJANA_ATM_PCC_NETWORK												KRIGE_RESPONSE_TO_TOSEDOSTAT_24HR_UP								KRIGE_RESPONSE_TO_TOSEDOSTAT_6HR_UP
9658	ZNF516	zinc finger protein 516			PUJANA_ATM_PCC_NETWORK																	BENPORATH_NANOG_TARGETS
5452	POU2F2	POU class 2 homeobox 2			PUJANA_ATM_PCC_NETWORK																														GARY_CD5_TARGETS_UP														LOPEZ_MBD_TARGETS
90634	N4BP2L1	NEDD4 binding protein 2-like 1			PUJANA_ATM_PCC_NETWORK																																					GRAESSMANN_APOPTOSIS_BY_DOXORUBICIN_UP	GOBERT_OLIGODENDROCYTE_DIFFERENTIATION_DN				ZWANG_TRANSIENTLY_UP_BY_1ST_EGF_PULSE_ONLY
10750	GRAP	GRB2-related adaptor protein			PUJANA_ATM_PCC_NETWORK																																							MARSON_BOUND_BY_FOXP3_STIMULATED
9466	IL27RA	interleukin 27 receptor, alpha			PUJANA_ATM_PCC_NETWORK																																												LOPEZ_MBD_TARGETS
1983	EIF5	eukaryotic translation initiation factor 5				DIAZ_CHRONIC_MEYLOGENOUS_LEUKEMIA_UP	PUJANA_BRCA1_PCC_NETWORK	BLALOCK_ALZHEIMERS_DISEASE_UP			NUYTTEN_EZH2_TARGETS_UP	SCHLOSSER_SERUM_RESPONSE_DN					KRIGE_RESPONSE_TO_TOSEDOSTAT_24HR_UP		MARSON_BOUND_BY_FOXP3_UNSTIMULATED		BLALOCK_ALZHEIMERS_DISEASE_DN				KRIGE_RESPONSE_TO_TOSEDOSTAT_6HR_UP			OSMAN_BLADDER_CANCER_UP			SPIELMAN_LYMPHOBLAST_EUROPEAN_VS_ASIAN_DN										JOHNSTONE_PARVB_TARGETS_3_DN			MARSON_BOUND_BY_FOXP3_STIMULATED
11338	U2AF2	U2 small nuclear RNA auxiliary factor 2				DIAZ_CHRONIC_MEYLOGENOUS_LEUKEMIA_UP	PUJANA_BRCA1_PCC_NETWORK	BLALOCK_ALZHEIMERS_DISEASE_UP																			DODD_NASOPHARYNGEAL_CARCINOMA_DN
372	ARCN1	archain 1				DIAZ_CHRONIC_MEYLOGENOUS_LEUKEMIA_UP	PUJANA_BRCA1_PCC_NETWORK					SCHLOSSER_SERUM_RESPONSE_DN							MARSON_BOUND_BY_FOXP3_UNSTIMULATED		BLALOCK_ALZHEIMERS_DISEASE_DN																			LASTOWSKA_NEUROBLASTOMA_COPY_NUMBER_DN
522	ATP5J	ATP synthase, H+ transporting, mitochondrial Fo complex, subunit F6				DIAZ_CHRONIC_MEYLOGENOUS_LEUKEMIA_UP	PUJANA_BRCA1_PCC_NETWORK					SCHLOSSER_SERUM_RESPONSE_DN									BLALOCK_ALZHEIMERS_DISEASE_DN																											PUJANA_CHEK2_PCC_NETWORK
26191	PTPN22	protein tyrosine phosphatase, non-receptor type 22 (lymphoid)				DIAZ_CHRONIC_MEYLOGENOUS_LEUKEMIA_UP	PUJANA_BRCA1_PCC_NETWORK							CHEN_METABOLIC_SYNDROM_NETWORK					MARSON_BOUND_BY_FOXP3_UNSTIMULATED									OSMAN_BLADDER_CANCER_UP			SPIELMAN_LYMPHOBLAST_EUROPEAN_VS_ASIAN_DN	ZHENG_BOUND_BY_FOXP3												MARSON_BOUND_BY_FOXP3_STIMULATED
5162	PDHB	pyruvate dehydrogenase (lipoamide) beta				DIAZ_CHRONIC_MEYLOGENOUS_LEUKEMIA_UP	PUJANA_BRCA1_PCC_NETWORK														BLALOCK_ALZHEIMERS_DISEASE_DN	BENPORATH_NANOG_TARGETS											SHEN_SMARCA2_TARGETS_UP
3276	PRMT1	protein arginine methyltransferase 1				DIAZ_CHRONIC_MEYLOGENOUS_LEUKEMIA_UP	PUJANA_BRCA1_PCC_NETWORK														BLALOCK_ALZHEIMERS_DISEASE_DN				KRIGE_RESPONSE_TO_TOSEDOSTAT_6HR_UP		DODD_NASOPHARYNGEAL_CARCINOMA_DN																					PUJANA_CHEK2_PCC_NETWORK
51564	HDAC7	histone deacetylase 7				DIAZ_CHRONIC_MEYLOGENOUS_LEUKEMIA_UP		BLALOCK_ALZHEIMERS_DISEASE_UP	GRAESSMANN_APOPTOSIS_BY_DOXORUBICIN_DN											KUMAR_TARGETS_OF_MLL_AF9_FUSION
23450	SF3B3	splicing factor 3b, subunit 3, 130kDa				DIAZ_CHRONIC_MEYLOGENOUS_LEUKEMIA_UP		BLALOCK_ALZHEIMERS_DISEASE_UP	GRAESSMANN_APOPTOSIS_BY_DOXORUBICIN_DN																														MILI_PSEUDOPODIA_CHEMOTAXIS_DN
65110	UPF3A	UPF3 regulator of nonsense transcripts homolog A (yeast)				DIAZ_CHRONIC_MEYLOGENOUS_LEUKEMIA_UP		BLALOCK_ALZHEIMERS_DISEASE_UP										ACEVEDO_LIVER_CANCER_UP															SHEN_SMARCA2_TARGETS_UP			ENK_UV_RESPONSE_KERATINOCYTE_DN					JOHNSTONE_PARVB_TARGETS_3_DN
9588	PRDX6	peroxiredoxin 6				DIAZ_CHRONIC_MEYLOGENOUS_LEUKEMIA_UP		BLALOCK_ALZHEIMERS_DISEASE_UP											MARSON_BOUND_BY_FOXP3_UNSTIMULATED																									MARSON_BOUND_BY_FOXP3_STIMULATED
57862	ZNF410	zinc finger protein 410				DIAZ_CHRONIC_MEYLOGENOUS_LEUKEMIA_UP		BLALOCK_ALZHEIMERS_DISEASE_UP																ONKEN_UVEAL_MELANOMA_UP
9570	GOSR2	golgi SNAP receptor complex member 2				DIAZ_CHRONIC_MEYLOGENOUS_LEUKEMIA_UP		BLALOCK_ALZHEIMERS_DISEASE_UP																			DODD_NASOPHARYNGEAL_CARCINOMA_DN				SPIELMAN_LYMPHOBLAST_EUROPEAN_VS_ASIAN_DN
6780	STAU1	staufen, RNA binding protein, homolog 1 (Drosophila)				DIAZ_CHRONIC_MEYLOGENOUS_LEUKEMIA_UP		BLALOCK_ALZHEIMERS_DISEASE_UP																									SHEN_SMARCA2_TARGETS_UP			ENK_UV_RESPONSE_KERATINOCYTE_DN						GRAESSMANN_APOPTOSIS_BY_DOXORUBICIN_UP
7534	YWHAZ	tyrosine 3-monooxygenase/tryptophan 5-monooxygenase activation protein, zeta polypeptide				DIAZ_CHRONIC_MEYLOGENOUS_LEUKEMIA_UP			GRAESSMANN_APOPTOSIS_BY_DOXORUBICIN_DN	REACTOME_IMMUNE_SYSTEM	NUYTTEN_EZH2_TARGETS_UP								MARSON_BOUND_BY_FOXP3_UNSTIMULATED		BLALOCK_ALZHEIMERS_DISEASE_DN			ONKEN_UVEAL_MELANOMA_UP		KOINUMA_TARGETS_OF_SMAD2_OR_SMAD3					SPIELMAN_LYMPHOBLAST_EUROPEAN_VS_ASIAN_DN															NUYTTEN_NIPP1_TARGETS_UP
6777	STAT5B	signal transducer and activator of transcription 5B				DIAZ_CHRONIC_MEYLOGENOUS_LEUKEMIA_UP			GRAESSMANN_APOPTOSIS_BY_DOXORUBICIN_DN	REACTOME_IMMUNE_SYSTEM																						ZHENG_BOUND_BY_FOXP3			GARY_CD5_TARGETS_UP
664	BNIP3	BCL2/adenovirus E1B 19kDa interacting protein 3				DIAZ_CHRONIC_MEYLOGENOUS_LEUKEMIA_UP			GRAESSMANN_APOPTOSIS_BY_DOXORUBICIN_DN		NUYTTEN_EZH2_TARGETS_UP		FLECHNER_BIOPSY_KIDNEY_TRANSPLANT_OK_VS_DONOR_UP								BLALOCK_ALZHEIMERS_DISEASE_DN																						GOBERT_OLIGODENDROCYTE_DIFFERENTIATION_DN			NUYTTEN_NIPP1_TARGETS_UP
10059	DNM1L	dynamin 1-like				DIAZ_CHRONIC_MEYLOGENOUS_LEUKEMIA_UP			GRAESSMANN_APOPTOSIS_BY_DOXORUBICIN_DN												BLALOCK_ALZHEIMERS_DISEASE_DN						DODD_NASOPHARYNGEAL_CARCINOMA_DN		MILI_PSEUDOPODIA_HAPTOTAXIS_UP
10451	VAV3	vav 3 guanine nucleotide exchange factor				DIAZ_CHRONIC_MEYLOGENOUS_LEUKEMIA_UP			GRAESSMANN_APOPTOSIS_BY_DOXORUBICIN_DN																																						ZWANG_TRANSIENTLY_UP_BY_1ST_EGF_PULSE_ONLY
1982	EIF4G2	eukaryotic translation initiation factor 4 gamma, 2				DIAZ_CHRONIC_MEYLOGENOUS_LEUKEMIA_UP				REACTOME_IMMUNE_SYSTEM												BENPORATH_NANOG_TARGETS							MILI_PSEUDOPODIA_HAPTOTAXIS_UP
10558	SPTLC1	serine palmitoyltransferase, long chain base subunit 1				DIAZ_CHRONIC_MEYLOGENOUS_LEUKEMIA_UP					NUYTTEN_EZH2_TARGETS_UP	SCHLOSSER_SERUM_RESPONSE_DN																			SPIELMAN_LYMPHOBLAST_EUROPEAN_VS_ASIAN_DN		SHEN_SMARCA2_TARGETS_UP						MILI_PSEUDOPODIA_CHEMOTAXIS_DN							NUYTTEN_NIPP1_TARGETS_UP
11034	DSTN	destrin (actin depolymerizing factor)				DIAZ_CHRONIC_MEYLOGENOUS_LEUKEMIA_UP						SCHLOSSER_SERUM_RESPONSE_DN	FLECHNER_BIOPSY_KIDNEY_TRANSPLANT_OK_VS_DONOR_UP													KOINUMA_TARGETS_OF_SMAD2_OR_SMAD3																GRAESSMANN_APOPTOSIS_BY_DOXORUBICIN_UP
10920	COPS8	COP9 constitutive photomorphogenic homolog subunit 8 (Arabidopsis)				DIAZ_CHRONIC_MEYLOGENOUS_LEUKEMIA_UP						SCHLOSSER_SERUM_RESPONSE_DN									BLALOCK_ALZHEIMERS_DISEASE_DN			ONKEN_UVEAL_MELANOMA_UP		KOINUMA_TARGETS_OF_SMAD2_OR_SMAD3							SHEN_SMARCA2_TARGETS_UP								JOHNSTONE_PARVB_TARGETS_3_DN
27101	CACYBP	calcyclin binding protein				DIAZ_CHRONIC_MEYLOGENOUS_LEUKEMIA_UP						SCHLOSSER_SERUM_RESPONSE_DN									BLALOCK_ALZHEIMERS_DISEASE_DN						DODD_NASOPHARYNGEAL_CARCINOMA_DN		MILI_PSEUDOPODIA_HAPTOTAXIS_UP
2581	GALC	galactosylceramidase				DIAZ_CHRONIC_MEYLOGENOUS_LEUKEMIA_UP							FLECHNER_BIOPSY_KIDNEY_TRANSPLANT_OK_VS_DONOR_UP		CUI_TCF21_TARGETS_2_DN						BLALOCK_ALZHEIMERS_DISEASE_DN										SPIELMAN_LYMPHOBLAST_EUROPEAN_VS_ASIAN_DN												GOBERT_OLIGODENDROCYTE_DIFFERENTIATION_DN
196	AHR	aryl hydrocarbon receptor				DIAZ_CHRONIC_MEYLOGENOUS_LEUKEMIA_UP							FLECHNER_BIOPSY_KIDNEY_TRANSPLANT_OK_VS_DONOR_UP													KOINUMA_TARGETS_OF_SMAD2_OR_SMAD3						ZHENG_BOUND_BY_FOXP3						DAZARD_RESPONSE_TO_UV_NHEK_DN				GRAESSMANN_APOPTOSIS_BY_DOXORUBICIN_UP	GOBERT_OLIGODENDROCYTE_DIFFERENTIATION_DN
2799	GNS	glucosamine (N-acetyl)-6-sulfatase				DIAZ_CHRONIC_MEYLOGENOUS_LEUKEMIA_UP								CHEN_METABOLIC_SYNDROM_NETWORK			KRIGE_RESPONSE_TO_TOSEDOSTAT_24HR_UP							ONKEN_UVEAL_MELANOMA_UP	KRIGE_RESPONSE_TO_TOSEDOSTAT_6HR_UP										GARY_CD5_TARGETS_UP				MILI_PSEUDOPODIA_CHEMOTAXIS_DN			GRAESSMANN_APOPTOSIS_BY_DOXORUBICIN_UP							LOPEZ_MBD_TARGETS
6775	STAT4	signal transducer and activator of transcription 4				DIAZ_CHRONIC_MEYLOGENOUS_LEUKEMIA_UP								CHEN_METABOLIC_SYNDROM_NETWORK																		ZHENG_BOUND_BY_FOXP3															ZWANG_TRANSIENTLY_UP_BY_1ST_EGF_PULSE_ONLY
10767	HBS1L	HBS1-like (S. cerevisiae)				DIAZ_CHRONIC_MEYLOGENOUS_LEUKEMIA_UP								CHEN_METABOLIC_SYNDROM_NETWORK																		ZHENG_BOUND_BY_FOXP3
10150	MBNL2	muscleblind-like 2 (Drosophila)				DIAZ_CHRONIC_MEYLOGENOUS_LEUKEMIA_UP									CUI_TCF21_TARGETS_2_DN		KRIGE_RESPONSE_TO_TOSEDOSTAT_24HR_UP								KRIGE_RESPONSE_TO_TOSEDOSTAT_6HR_UP	KOINUMA_TARGETS_OF_SMAD2_OR_SMAD3			MILI_PSEUDOPODIA_HAPTOTAXIS_UP														GOBERT_OLIGODENDROCYTE_DIFFERENTIATION_DN
210	ALAD	aminolevulinate dehydratase				DIAZ_CHRONIC_MEYLOGENOUS_LEUKEMIA_UP										RODRIGUES_THYROID_CARCINOMA_POORLY_DIFFERENTIATED_DN																										GRAESSMANN_APOPTOSIS_BY_DOXORUBICIN_UP
123	PLIN2	perilipin 2				DIAZ_CHRONIC_MEYLOGENOUS_LEUKEMIA_UP											KRIGE_RESPONSE_TO_TOSEDOSTAT_24HR_UP					BENPORATH_NANOG_TARGETS			KRIGE_RESPONSE_TO_TOSEDOSTAT_6HR_UP																	GRAESSMANN_APOPTOSIS_BY_DOXORUBICIN_UP		MARSON_BOUND_BY_FOXP3_STIMULATED
58478	ENOPH1	enolase-phosphatase 1				DIAZ_CHRONIC_MEYLOGENOUS_LEUKEMIA_UP												ACEVEDO_LIVER_CANCER_UP	MARSON_BOUND_BY_FOXP3_UNSTIMULATED		BLALOCK_ALZHEIMERS_DISEASE_DN						DODD_NASOPHARYNGEAL_CARCINOMA_DN			ACEVEDO_LIVER_TUMOR_VS_NORMAL_ADJACENT_TISSUE_UP														MARSON_BOUND_BY_FOXP3_STIMULATED
59349	KLHL12	kelch-like 12 (Drosophila)				DIAZ_CHRONIC_MEYLOGENOUS_LEUKEMIA_UP												ACEVEDO_LIVER_CANCER_UP									DODD_NASOPHARYNGEAL_CARCINOMA_DN			ACEVEDO_LIVER_TUMOR_VS_NORMAL_ADJACENT_TISSUE_UP
10419	PRMT5	protein arginine methyltransferase 5				DIAZ_CHRONIC_MEYLOGENOUS_LEUKEMIA_UP													MARSON_BOUND_BY_FOXP3_UNSTIMULATED												SPIELMAN_LYMPHOBLAST_EUROPEAN_VS_ASIAN_DN													MARSON_BOUND_BY_FOXP3_STIMULATED
9804	TOMM20	translocase of outer mitochondrial membrane 20 homolog (yeast)				DIAZ_CHRONIC_MEYLOGENOUS_LEUKEMIA_UP															BLALOCK_ALZHEIMERS_DISEASE_DN										SPIELMAN_LYMPHOBLAST_EUROPEAN_VS_ASIAN_DN					ENK_UV_RESPONSE_KERATINOCYTE_DN
9416	DDX23	DEAD (Asp-Glu-Ala-Asp) box polypeptide 23				DIAZ_CHRONIC_MEYLOGENOUS_LEUKEMIA_UP																BENPORATH_NANOG_TARGETS																					GOBERT_OLIGODENDROCYTE_DIFFERENTIATION_DN						LOPEZ_MBD_TARGETS
8821	INPP4B	inositol polyphosphate-4-phosphatase, type II, 105kDa				DIAZ_CHRONIC_MEYLOGENOUS_LEUKEMIA_UP																		ONKEN_UVEAL_MELANOMA_UP								ZHENG_BOUND_BY_FOXP3
26225	ARL5A	ADP-ribosylation factor-like 5A				DIAZ_CHRONIC_MEYLOGENOUS_LEUKEMIA_UP																							MILI_PSEUDOPODIA_HAPTOTAXIS_UP		SPIELMAN_LYMPHOBLAST_EUROPEAN_VS_ASIAN_DN
8237	USP11	ubiquitin specific peptidase 11				DIAZ_CHRONIC_MEYLOGENOUS_LEUKEMIA_UP																								ACEVEDO_LIVER_TUMOR_VS_NORMAL_ADJACENT_TISSUE_UP
26354	GNL3	guanine nucleotide binding protein-like 3 (nucleolar)				DIAZ_CHRONIC_MEYLOGENOUS_LEUKEMIA_UP																																		LASTOWSKA_NEUROBLASTOMA_COPY_NUMBER_DN
11140	CDC37	cell division cycle 37 homolog (S. cerevisiae)				DIAZ_CHRONIC_MEYLOGENOUS_LEUKEMIA_UP																																											LOPEZ_MBD_TARGETS
1209	CLPTM1	cleft lip and palate associated transmembrane protein 1				DIAZ_CHRONIC_MEYLOGENOUS_LEUKEMIA_UP
9830	TRIM14	tripartite motif containing 14					PUJANA_BRCA1_PCC_NETWORK	BLALOCK_ALZHEIMERS_DISEASE_UP			NUYTTEN_EZH2_TARGETS_UP																										LEE_DIFFERENTIATING_T_LYMPHOCYTE
23468	CBX5	chromobox homolog 5					PUJANA_BRCA1_PCC_NETWORK		GRAESSMANN_APOPTOSIS_BY_DOXORUBICIN_DN								KRIGE_RESPONSE_TO_TOSEDOSTAT_24HR_UP					BENPORATH_NANOG_TARGETS			KRIGE_RESPONSE_TO_TOSEDOSTAT_6HR_UP		DODD_NASOPHARYNGEAL_CARCINOMA_DN														JOHNSTONE_PARVB_TARGETS_3_DN
55699	IARS2	isoleucyl-tRNA synthetase 2, mitochondrial					PUJANA_BRCA1_PCC_NETWORK		GRAESSMANN_APOPTOSIS_BY_DOXORUBICIN_DN									ACEVEDO_LIVER_CANCER_UP		KUMAR_TARGETS_OF_MLL_AF9_FUSION										ACEVEDO_LIVER_TUMOR_VS_NORMAL_ADJACENT_TISSUE_UP																		PUJANA_CHEK2_PCC_NETWORK
673	BRAF	v-raf murine sarcoma viral oncogene homolog B1					PUJANA_BRCA1_PCC_NETWORK		GRAESSMANN_APOPTOSIS_BY_DOXORUBICIN_DN																										GARY_CD5_TARGETS_UP														LOPEZ_MBD_TARGETS
10199	MPHOSPH10	M-phase phosphoprotein 10 (U3 small nucleolar ribonucleoprotein)					PUJANA_BRCA1_PCC_NETWORK		GRAESSMANN_APOPTOSIS_BY_DOXORUBICIN_DN																													DAZARD_RESPONSE_TO_UV_NHEK_DN										PUJANA_CHEK2_PCC_NETWORK
3838	KPNA2	karyopherin alpha 2 (RAG cohort 1, importin alpha 1)					PUJANA_BRCA1_PCC_NETWORK			REACTOME_IMMUNE_SYSTEM			FLECHNER_BIOPSY_KIDNEY_TRANSPLANT_OK_VS_DONOR_UP					ACEVEDO_LIVER_CANCER_UP			BLALOCK_ALZHEIMERS_DISEASE_DN			ONKEN_UVEAL_MELANOMA_UP			DODD_NASOPHARYNGEAL_CARCINOMA_DN			ACEVEDO_LIVER_TUMOR_VS_NORMAL_ADJACENT_TISSUE_UP																		PUJANA_CHEK2_PCC_NETWORK
777	CACNA1E	calcium channel, voltage-dependent, R type, alpha 1E subunit					PUJANA_BRCA1_PCC_NETWORK					SCHLOSSER_SERUM_RESPONSE_DN
6272	SORT1	sortilin 1					PUJANA_BRCA1_PCC_NETWORK							CHEN_METABOLIC_SYNDROM_NETWORK				ACEVEDO_LIVER_CANCER_UP																														PUJANA_CHEK2_PCC_NETWORK
3159	HMGA1	high mobility group AT-hook 1					PUJANA_BRCA1_PCC_NETWORK							CHEN_METABOLIC_SYNDROM_NETWORK																					GARY_CD5_TARGETS_UP							GRAESSMANN_APOPTOSIS_BY_DOXORUBICIN_UP
27258	LSM3	LSM3 homolog, U6 small nuclear RNA associated (S. cerevisiae)					PUJANA_BRCA1_PCC_NETWORK											ACEVEDO_LIVER_CANCER_UP	MARSON_BOUND_BY_FOXP3_UNSTIMULATED		BLALOCK_ALZHEIMERS_DISEASE_DN	BENPORATH_NANOG_TARGETS								ACEVEDO_LIVER_TUMOR_VS_NORMAL_ADJACENT_TISSUE_UP										LASTOWSKA_NEUROBLASTOMA_COPY_NUMBER_DN								PUJANA_CHEK2_PCC_NETWORK
1164	CKS2	CDC28 protein kinase regulatory subunit 2					PUJANA_BRCA1_PCC_NETWORK											ACEVEDO_LIVER_CANCER_UP			BLALOCK_ALZHEIMERS_DISEASE_DN	BENPORATH_NANOG_TARGETS		ONKEN_UVEAL_MELANOMA_UP			DODD_NASOPHARYNGEAL_CARCINOMA_DN			ACEVEDO_LIVER_TUMOR_VS_NORMAL_ADJACENT_TISSUE_UP																		PUJANA_CHEK2_PCC_NETWORK
6631	SNRPC	small nuclear ribonucleoprotein polypeptide C					PUJANA_BRCA1_PCC_NETWORK											ACEVEDO_LIVER_CANCER_UP												ACEVEDO_LIVER_TUMOR_VS_NORMAL_ADJACENT_TISSUE_UP											JOHNSTONE_PARVB_TARGETS_3_DN							PUJANA_CHEK2_PCC_NETWORK
8364	HIST1H4C	histone cluster 1, H4c					PUJANA_BRCA1_PCC_NETWORK												MARSON_BOUND_BY_FOXP3_UNSTIMULATED			BENPORATH_NANOG_TARGETS														ENK_UV_RESPONSE_KERATINOCYTE_DN								MARSON_BOUND_BY_FOXP3_STIMULATED				PUJANA_CHEK2_PCC_NETWORK
6574	SLC20A1	solute carrier family 20 (phosphate transporter), member 1					PUJANA_BRCA1_PCC_NETWORK												MARSON_BOUND_BY_FOXP3_UNSTIMULATED					ONKEN_UVEAL_MELANOMA_UP		KOINUMA_TARGETS_OF_SMAD2_OR_SMAD3													MILI_PSEUDOPODIA_CHEMOTAXIS_DN			GRAESSMANN_APOPTOSIS_BY_DOXORUBICIN_UP		MARSON_BOUND_BY_FOXP3_STIMULATED
939	CD27	CD27 molecule					PUJANA_BRCA1_PCC_NETWORK													KUMAR_TARGETS_OF_MLL_AF9_FUSION														HADDAD_B_LYMPHOCYTE_PROGENITOR											OSMAN_BLADDER_CANCER_DN				LOPEZ_MBD_TARGETS
6175	RPLP0	ribosomal protein, large, P0					PUJANA_BRCA1_PCC_NETWORK																				DODD_NASOPHARYNGEAL_CARCINOMA_DN			ACEVEDO_LIVER_TUMOR_VS_NORMAL_ADJACENT_TISSUE_UP															OSMAN_BLADDER_CANCER_DN				LOPEZ_MBD_TARGETS
892	CCNC	cyclin C					PUJANA_BRCA1_PCC_NETWORK																						MILI_PSEUDOPODIA_HAPTOTAXIS_UP		SPIELMAN_LYMPHOBLAST_EUROPEAN_VS_ASIAN_DN																	PUJANA_CHEK2_PCC_NETWORK
9657	IQCB1	IQ motif containing B1					PUJANA_BRCA1_PCC_NETWORK
5496	PPM1G	protein phosphatase, Mg2+/Mn2+ dependent, 1G					PUJANA_BRCA1_PCC_NETWORK
3572	IL6ST	interleukin 6 signal transducer (gp130, oncostatin M receptor)						BLALOCK_ALZHEIMERS_DISEASE_UP	GRAESSMANN_APOPTOSIS_BY_DOXORUBICIN_DN	REACTOME_IMMUNE_SYSTEM	NUYTTEN_EZH2_TARGETS_UP	SCHLOSSER_SERUM_RESPONSE_DN	FLECHNER_BIOPSY_KIDNEY_TRANSPLANT_OK_VS_DONOR_UP		CUI_TCF21_TARGETS_2_DN																	ZHENG_BOUND_BY_FOXP3							MILI_PSEUDOPODIA_CHEMOTAXIS_DN
2002	ELK1	ELK1, member of ETS oncogene family						BLALOCK_ALZHEIMERS_DISEASE_UP	GRAESSMANN_APOPTOSIS_BY_DOXORUBICIN_DN	REACTOME_IMMUNE_SYSTEM
1130	LYST	lysosomal trafficking regulator						BLALOCK_ALZHEIMERS_DISEASE_UP	GRAESSMANN_APOPTOSIS_BY_DOXORUBICIN_DN		NUYTTEN_EZH2_TARGETS_UP				CUI_TCF21_TARGETS_2_DN													OSMAN_BLADDER_CANCER_UP			SPIELMAN_LYMPHOBLAST_EUROPEAN_VS_ASIAN_DN					ENK_UV_RESPONSE_KERATINOCYTE_DN
10100	TSPAN2	tetraspanin 2						BLALOCK_ALZHEIMERS_DISEASE_UP	GRAESSMANN_APOPTOSIS_BY_DOXORUBICIN_DN		NUYTTEN_EZH2_TARGETS_UP				CUI_TCF21_TARGETS_2_DN																												GOBERT_OLIGODENDROCYTE_DIFFERENTIATION_DN			NUYTTEN_NIPP1_TARGETS_UP
6238	RRBP1	ribosome binding protein 1 homolog 180kDa (dog)						BLALOCK_ALZHEIMERS_DISEASE_UP	GRAESSMANN_APOPTOSIS_BY_DOXORUBICIN_DN		NUYTTEN_EZH2_TARGETS_UP					RODRIGUES_THYROID_CARCINOMA_POORLY_DIFFERENTIATED_DN																				ENK_UV_RESPONSE_KERATINOCYTE_DN			MILI_PSEUDOPODIA_CHEMOTAXIS_DN
28996	HIPK2	homeodomain interacting protein kinase 2						BLALOCK_ALZHEIMERS_DISEASE_UP	GRAESSMANN_APOPTOSIS_BY_DOXORUBICIN_DN							RODRIGUES_THYROID_CARCINOMA_POORLY_DIFFERENTIATED_DN	KRIGE_RESPONSE_TO_TOSEDOSTAT_24HR_UP								KRIGE_RESPONSE_TO_TOSEDOSTAT_6HR_UP			OSMAN_BLADDER_CANCER_UP															GOBERT_OLIGODENDROCYTE_DIFFERENTIATION_DN
22794	CASC3	cancer susceptibility candidate 3						BLALOCK_ALZHEIMERS_DISEASE_UP	GRAESSMANN_APOPTOSIS_BY_DOXORUBICIN_DN							RODRIGUES_THYROID_CARCINOMA_POORLY_DIFFERENTIATED_DN
79144	PPDPF	pancreatic progenitor cell differentiation and proliferation factor homolog (zebrafish)						BLALOCK_ALZHEIMERS_DISEASE_UP	GRAESSMANN_APOPTOSIS_BY_DOXORUBICIN_DN								KRIGE_RESPONSE_TO_TOSEDOSTAT_24HR_UP								KRIGE_RESPONSE_TO_TOSEDOSTAT_6HR_UP
81627	TRMT1L	TRM1 tRNA methyltransferase 1-like						BLALOCK_ALZHEIMERS_DISEASE_UP	GRAESSMANN_APOPTOSIS_BY_DOXORUBICIN_DN									ACEVEDO_LIVER_CANCER_UP												ACEVEDO_LIVER_TUMOR_VS_NORMAL_ADJACENT_TISSUE_UP			SHEN_SMARCA2_TARGETS_UP
2969	GTF2I	general transcription factor IIi						BLALOCK_ALZHEIMERS_DISEASE_UP	GRAESSMANN_APOPTOSIS_BY_DOXORUBICIN_DN																	KOINUMA_TARGETS_OF_SMAD2_OR_SMAD3															JOHNSTONE_PARVB_TARGETS_3_DN
4668	NAGA	N-acetylgalactosaminidase, alpha-						BLALOCK_ALZHEIMERS_DISEASE_UP	GRAESSMANN_APOPTOSIS_BY_DOXORUBICIN_DN																					ACEVEDO_LIVER_TUMOR_VS_NORMAL_ADJACENT_TISSUE_UP									MILI_PSEUDOPODIA_CHEMOTAXIS_DN				GOBERT_OLIGODENDROCYTE_DIFFERENTIATION_DN
5610	EIF2AK2	eukaryotic translation initiation factor 2-alpha kinase 2						BLALOCK_ALZHEIMERS_DISEASE_UP		REACTOME_IMMUNE_SYSTEM	NUYTTEN_EZH2_TARGETS_UP	SCHLOSSER_SERUM_RESPONSE_DN	FLECHNER_BIOPSY_KIDNEY_TRANSPLANT_OK_VS_DONOR_UP														DODD_NASOPHARYNGEAL_CARCINOMA_DN						SHEN_SMARCA2_TARGETS_UP													NUYTTEN_NIPP1_TARGETS_UP
5371	PML	promyelocytic leukemia						BLALOCK_ALZHEIMERS_DISEASE_UP		REACTOME_IMMUNE_SYSTEM	NUYTTEN_EZH2_TARGETS_UP						KRIGE_RESPONSE_TO_TOSEDOSTAT_24HR_UP		MARSON_BOUND_BY_FOXP3_UNSTIMULATED	KUMAR_TARGETS_OF_MLL_AF9_FUSION					KRIGE_RESPONSE_TO_TOSEDOSTAT_6HR_UP	KOINUMA_TARGETS_OF_SMAD2_OR_SMAD3																GRAESSMANN_APOPTOSIS_BY_DOXORUBICIN_UP			OSMAN_BLADDER_CANCER_DN	NUYTTEN_NIPP1_TARGETS_UP
727	C5	complement component 5						BLALOCK_ALZHEIMERS_DISEASE_UP		REACTOME_IMMUNE_SYSTEM																																					ZWANG_TRANSIENTLY_UP_BY_1ST_EGF_PULSE_ONLY		LOPEZ_MBD_TARGETS
55603	FAM46A	family with sequence similarity 46, member A						BLALOCK_ALZHEIMERS_DISEASE_UP			NUYTTEN_EZH2_TARGETS_UP				CUI_TCF21_TARGETS_2_DN																												GOBERT_OLIGODENDROCYTE_DIFFERENTIATION_DN
23780	APOL2	apolipoprotein L, 2						BLALOCK_ALZHEIMERS_DISEASE_UP			NUYTTEN_EZH2_TARGETS_UP																																			NUYTTEN_NIPP1_TARGETS_UP	ZWANG_TRANSIENTLY_UP_BY_1ST_EGF_PULSE_ONLY
23032	USP33	ubiquitin specific peptidase 33						BLALOCK_ALZHEIMERS_DISEASE_UP				SCHLOSSER_SERUM_RESPONSE_DN	FLECHNER_BIOPSY_KIDNEY_TRANSPLANT_OK_VS_DONOR_UP		CUI_TCF21_TARGETS_2_DN						BLALOCK_ALZHEIMERS_DISEASE_DN																			LASTOWSKA_NEUROBLASTOMA_COPY_NUMBER_DN
1730	DIAPH2	diaphanous homolog 2 (Drosophila)						BLALOCK_ALZHEIMERS_DISEASE_UP				SCHLOSSER_SERUM_RESPONSE_DN			CUI_TCF21_TARGETS_2_DN									ONKEN_UVEAL_MELANOMA_UP				OSMAN_BLADDER_CANCER_UP																			ZWANG_TRANSIENTLY_UP_BY_1ST_EGF_PULSE_ONLY
202	AIM1	absent in melanoma 1						BLALOCK_ALZHEIMERS_DISEASE_UP				SCHLOSSER_SERUM_RESPONSE_DN
1462	VCAN	versican						BLALOCK_ALZHEIMERS_DISEASE_UP					FLECHNER_BIOPSY_KIDNEY_TRANSPLANT_OK_VS_DONOR_UP	CHEN_METABOLIC_SYNDROM_NETWORK								BENPORATH_NANOG_TARGETS					DODD_NASOPHARYNGEAL_CARCINOMA_DN
3772	KCNJ15	potassium inwardly-rectifying channel, subfamily J, member 15						BLALOCK_ALZHEIMERS_DISEASE_UP					FLECHNER_BIOPSY_KIDNEY_TRANSPLANT_OK_VS_DONOR_UP													KOINUMA_TARGETS_OF_SMAD2_OR_SMAD3
28232	SLCO3A1	solute carrier organic anion transporter family, member 3A1						BLALOCK_ALZHEIMERS_DISEASE_UP						CHEN_METABOLIC_SYNDROM_NETWORK		RODRIGUES_THYROID_CARCINOMA_POORLY_DIFFERENTIATED_DN
26472	PPP1R14B	protein phosphatase 1, regulatory (inhibitor) subunit 14B						BLALOCK_ALZHEIMERS_DISEASE_UP						CHEN_METABOLIC_SYNDROM_NETWORK																					GARY_CD5_TARGETS_UP
116985	ARAP1	ArfGAP with RhoGAP domain, ankyrin repeat and PH domain 1						BLALOCK_ALZHEIMERS_DISEASE_UP						CHEN_METABOLIC_SYNDROM_NETWORK																												GRAESSMANN_APOPTOSIS_BY_DOXORUBICIN_UP
55909	BIN3	bridging integrator 3						BLALOCK_ALZHEIMERS_DISEASE_UP						CHEN_METABOLIC_SYNDROM_NETWORK																													GOBERT_OLIGODENDROCYTE_DIFFERENTIATION_DN	MARSON_BOUND_BY_FOXP3_STIMULATED
1106	CHD2	chromodomain helicase DNA binding protein 2						BLALOCK_ALZHEIMERS_DISEASE_UP								RODRIGUES_THYROID_CARCINOMA_POORLY_DIFFERENTIATED_DN	KRIGE_RESPONSE_TO_TOSEDOSTAT_24HR_UP					BENPORATH_NANOG_TARGETS			KRIGE_RESPONSE_TO_TOSEDOSTAT_6HR_UP							ZHENG_BOUND_BY_FOXP3									JOHNSTONE_PARVB_TARGETS_3_DN				OSMAN_BLADDER_CANCER_DN
55616	ASAP3	ArfGAP with SH3 domain, ankyrin repeat and PH domain 3						BLALOCK_ALZHEIMERS_DISEASE_UP								RODRIGUES_THYROID_CARCINOMA_POORLY_DIFFERENTIATED_DN																								LASTOWSKA_NEUROBLASTOMA_COPY_NUMBER_DN
10475	TRIM38	tripartite motif containing 38						BLALOCK_ALZHEIMERS_DISEASE_UP									KRIGE_RESPONSE_TO_TOSEDOSTAT_24HR_UP	ACEVEDO_LIVER_CANCER_UP							KRIGE_RESPONSE_TO_TOSEDOSTAT_6HR_UP									HADDAD_B_LYMPHOCYTE_PROGENITOR		ENK_UV_RESPONSE_KERATINOCYTE_DN									OSMAN_BLADDER_CANCER_DN	NUYTTEN_NIPP1_TARGETS_UP
687	KLF9	Kruppel-like factor 9						BLALOCK_ALZHEIMERS_DISEASE_UP									KRIGE_RESPONSE_TO_TOSEDOSTAT_24HR_UP								KRIGE_RESPONSE_TO_TOSEDOSTAT_6HR_UP											ENK_UV_RESPONSE_KERATINOCYTE_DN		DAZARD_RESPONSE_TO_UV_NHEK_DN									ZWANG_TRANSIENTLY_UP_BY_1ST_EGF_PULSE_ONLY
54910	SEMA4C	sema domain, immunoglobulin domain (Ig), transmembrane domain (TM) and short cytoplasmic domain, (semaphorin) 4C						BLALOCK_ALZHEIMERS_DISEASE_UP									KRIGE_RESPONSE_TO_TOSEDOSTAT_24HR_UP								KRIGE_RESPONSE_TO_TOSEDOSTAT_6HR_UP														MILI_PSEUDOPODIA_CHEMOTAXIS_DN										LOPEZ_MBD_TARGETS
55357	TBC1D2	TBC1 domain family, member 2						BLALOCK_ALZHEIMERS_DISEASE_UP										ACEVEDO_LIVER_CANCER_UP								KOINUMA_TARGETS_OF_SMAD2_OR_SMAD3				ACEVEDO_LIVER_TUMOR_VS_NORMAL_ADJACENT_TISSUE_UP
754	PTTG1IP	pituitary tumor-transforming 1 interacting protein						BLALOCK_ALZHEIMERS_DISEASE_UP										ACEVEDO_LIVER_CANCER_UP												ACEVEDO_LIVER_TUMOR_VS_NORMAL_ADJACENT_TISSUE_UP																			LOPEZ_MBD_TARGETS
25865	PRKD2	protein kinase D2						BLALOCK_ALZHEIMERS_DISEASE_UP										ACEVEDO_LIVER_CANCER_UP																								GRAESSMANN_APOPTOSIS_BY_DOXORUBICIN_UP
27300	ZNF544	zinc finger protein 544						BLALOCK_ALZHEIMERS_DISEASE_UP										ACEVEDO_LIVER_CANCER_UP																											OSMAN_BLADDER_CANCER_DN
10163	WASF2	WAS protein family, member 2						BLALOCK_ALZHEIMERS_DISEASE_UP											MARSON_BOUND_BY_FOXP3_UNSTIMULATED							KOINUMA_TARGETS_OF_SMAD2_OR_SMAD3					SPIELMAN_LYMPHOBLAST_EUROPEAN_VS_ASIAN_DN				GARY_CD5_TARGETS_UP									MARSON_BOUND_BY_FOXP3_STIMULATED
25949	SYF2	SYF2 homolog, RNA splicing factor (S. cerevisiae)						BLALOCK_ALZHEIMERS_DISEASE_UP											MARSON_BOUND_BY_FOXP3_UNSTIMULATED																									MARSON_BOUND_BY_FOXP3_STIMULATED
5339	PLEC	plectin						BLALOCK_ALZHEIMERS_DISEASE_UP																		KOINUMA_TARGETS_OF_SMAD2_OR_SMAD3																GRAESSMANN_APOPTOSIS_BY_DOXORUBICIN_UP	GOBERT_OLIGODENDROCYTE_DIFFERENTIATION_DN
29080	CCDC59	coiled-coil domain containing 59						BLALOCK_ALZHEIMERS_DISEASE_UP																			DODD_NASOPHARYNGEAL_CARCINOMA_DN																			NUYTTEN_NIPP1_TARGETS_UP	ZWANG_TRANSIENTLY_UP_BY_1ST_EGF_PULSE_ONLY
64342	HS1BP3	HCLS1 binding protein 3						BLALOCK_ALZHEIMERS_DISEASE_UP																						ACEVEDO_LIVER_TUMOR_VS_NORMAL_ADJACENT_TISSUE_UP
64121	RRAGC	Ras-related GTP binding C						BLALOCK_ALZHEIMERS_DISEASE_UP																							SPIELMAN_LYMPHOBLAST_EUROPEAN_VS_ASIAN_DN									LASTOWSKA_NEUROBLASTOMA_COPY_NUMBER_DN		GRAESSMANN_APOPTOSIS_BY_DOXORUBICIN_UP					ZWANG_TRANSIENTLY_UP_BY_1ST_EGF_PULSE_ONLY
57326	PBXIP1	pre-B-cell leukemia homeobox interacting protein 1						BLALOCK_ALZHEIMERS_DISEASE_UP																											GARY_CD5_TARGETS_UP												ZWANG_TRANSIENTLY_UP_BY_1ST_EGF_PULSE_ONLY
8175	SF3A2	splicing factor 3a, subunit 2, 66kDa						BLALOCK_ALZHEIMERS_DISEASE_UP																											GARY_CD5_TARGETS_UP
11060	WWP2	WW domain containing E3 ubiquitin protein ligase 2						BLALOCK_ALZHEIMERS_DISEASE_UP																															MILI_PSEUDOPODIA_CHEMOTAXIS_DN				GOBERT_OLIGODENDROCYTE_DIFFERENTIATION_DN
10023	FRAT1	frequently rearranged in advanced T-cell lymphomas						BLALOCK_ALZHEIMERS_DISEASE_UP																																LASTOWSKA_NEUROBLASTOMA_COPY_NUMBER_DN
10608	MXD4	MAX dimerization protein 4						BLALOCK_ALZHEIMERS_DISEASE_UP																																		GRAESSMANN_APOPTOSIS_BY_DOXORUBICIN_UP					ZWANG_TRANSIENTLY_UP_BY_1ST_EGF_PULSE_ONLY		LOPEZ_MBD_TARGETS
26035	GLCE	glucuronic acid epimerase						BLALOCK_ALZHEIMERS_DISEASE_UP																																				MARSON_BOUND_BY_FOXP3_STIMULATED
4051	CYP4F3	cytochrome P450, family 4, subfamily F, polypeptide 3						BLALOCK_ALZHEIMERS_DISEASE_UP																																							ZWANG_TRANSIENTLY_UP_BY_1ST_EGF_PULSE_ONLY
10077	TSPAN32	tetraspanin 32						BLALOCK_ALZHEIMERS_DISEASE_UP																																									LOPEZ_MBD_TARGETS
58528	RRAGD	Ras-related GTP binding D						BLALOCK_ALZHEIMERS_DISEASE_UP
7423	VEGFB	vascular endothelial growth factor B						BLALOCK_ALZHEIMERS_DISEASE_UP
6640	SNTA1	syntrophin, alpha 1 (dystrophin-associated protein A1, 59kDa, acidic component)						BLALOCK_ALZHEIMERS_DISEASE_UP
817	CAMK2D	calcium/calmodulin-dependent protein kinase II delta							GRAESSMANN_APOPTOSIS_BY_DOXORUBICIN_DN	REACTOME_IMMUNE_SYSTEM					CUI_TCF21_TARGETS_2_DN				MARSON_BOUND_BY_FOXP3_UNSTIMULATED	KUMAR_TARGETS_OF_MLL_AF9_FUSION									MILI_PSEUDOPODIA_HAPTOTAXIS_UP						GARY_CD5_TARGETS_UP								GOBERT_OLIGODENDROCYTE_DIFFERENTIATION_DN
7408	VASP	vasodilator-stimulated phosphoprotein							GRAESSMANN_APOPTOSIS_BY_DOXORUBICIN_DN	REACTOME_IMMUNE_SYSTEM																		OSMAN_BLADDER_CANCER_UP
23095	KIF1B	kinesin family member 1B							GRAESSMANN_APOPTOSIS_BY_DOXORUBICIN_DN		NUYTTEN_EZH2_TARGETS_UP				CUI_TCF21_TARGETS_2_DN		KRIGE_RESPONSE_TO_TOSEDOSTAT_24HR_UP				BLALOCK_ALZHEIMERS_DISEASE_DN				KRIGE_RESPONSE_TO_TOSEDOSTAT_6HR_UP		DODD_NASOPHARYNGEAL_CARCINOMA_DN													LASTOWSKA_NEUROBLASTOMA_COPY_NUMBER_DN			GOBERT_OLIGODENDROCYTE_DIFFERENTIATION_DN
5621	PRNP	prion protein							GRAESSMANN_APOPTOSIS_BY_DOXORUBICIN_DN		NUYTTEN_EZH2_TARGETS_UP						KRIGE_RESPONSE_TO_TOSEDOSTAT_24HR_UP					BENPORATH_NANOG_TARGETS			KRIGE_RESPONSE_TO_TOSEDOSTAT_6HR_UP	KOINUMA_TARGETS_OF_SMAD2_OR_SMAD3	DODD_NASOPHARYNGEAL_CARCINOMA_DN	OSMAN_BLADDER_CANCER_UP											MILI_PSEUDOPODIA_CHEMOTAXIS_DN				GOBERT_OLIGODENDROCYTE_DIFFERENTIATION_DN
58517	RBM25	RNA binding motif protein 25							GRAESSMANN_APOPTOSIS_BY_DOXORUBICIN_DN		NUYTTEN_EZH2_TARGETS_UP													ONKEN_UVEAL_MELANOMA_UP		KOINUMA_TARGETS_OF_SMAD2_OR_SMAD3			MILI_PSEUDOPODIA_HAPTOTAXIS_UP														GOBERT_OLIGODENDROCYTE_DIFFERENTIATION_DN			NUYTTEN_NIPP1_TARGETS_UP
23673	STX12	syntaxin 12							GRAESSMANN_APOPTOSIS_BY_DOXORUBICIN_DN			SCHLOSSER_SERUM_RESPONSE_DN				RODRIGUES_THYROID_CARCINOMA_POORLY_DIFFERENTIATED_DN			MARSON_BOUND_BY_FOXP3_UNSTIMULATED																					LASTOWSKA_NEUROBLASTOMA_COPY_NUMBER_DN
55577	NAGK	N-acetylglucosamine kinase							GRAESSMANN_APOPTOSIS_BY_DOXORUBICIN_DN					CHEN_METABOLIC_SYNDROM_NETWORK			KRIGE_RESPONSE_TO_TOSEDOSTAT_24HR_UP								KRIGE_RESPONSE_TO_TOSEDOSTAT_6HR_UP						SPIELMAN_LYMPHOBLAST_EUROPEAN_VS_ASIAN_DN								MILI_PSEUDOPODIA_CHEMOTAXIS_DN
6709	SPTAN1	spectrin, alpha, non-erythrocytic 1 (alpha-fodrin)							GRAESSMANN_APOPTOSIS_BY_DOXORUBICIN_DN					CHEN_METABOLIC_SYNDROM_NETWORK										ONKEN_UVEAL_MELANOMA_UP						ACEVEDO_LIVER_TUMOR_VS_NORMAL_ADJACENT_TISSUE_UP																			LOPEZ_MBD_TARGETS
84188	FAR1	fatty acyl CoA reductase 1							GRAESSMANN_APOPTOSIS_BY_DOXORUBICIN_DN					CHEN_METABOLIC_SYNDROM_NETWORK												KOINUMA_TARGETS_OF_SMAD2_OR_SMAD3		OSMAN_BLADDER_CANCER_UP	MILI_PSEUDOPODIA_HAPTOTAXIS_UP																	NUYTTEN_NIPP1_TARGETS_UP
79892	MCMBP	minichromosome maintenance complex binding protein							GRAESSMANN_APOPTOSIS_BY_DOXORUBICIN_DN					CHEN_METABOLIC_SYNDROM_NETWORK													DODD_NASOPHARYNGEAL_CARCINOMA_DN
55314	TMEM144	transmembrane protein 144							GRAESSMANN_APOPTOSIS_BY_DOXORUBICIN_DN					CHEN_METABOLIC_SYNDROM_NETWORK
92922	CCDC102A	coiled-coil domain containing 102A							GRAESSMANN_APOPTOSIS_BY_DOXORUBICIN_DN					CHEN_METABOLIC_SYNDROM_NETWORK
285636	C5orf51	chromosome 5 open reading frame 51							GRAESSMANN_APOPTOSIS_BY_DOXORUBICIN_DN						CUI_TCF21_TARGETS_2_DN			ACEVEDO_LIVER_CANCER_UP	MARSON_BOUND_BY_FOXP3_UNSTIMULATED											ACEVEDO_LIVER_TUMOR_VS_NORMAL_ADJACENT_TISSUE_UP
55788	LMBRD1	LMBR1 domain containing 1							GRAESSMANN_APOPTOSIS_BY_DOXORUBICIN_DN						CUI_TCF21_TARGETS_2_DN																		SHEN_SMARCA2_TARGETS_UP						MILI_PSEUDOPODIA_CHEMOTAXIS_DN				GOBERT_OLIGODENDROCYTE_DIFFERENTIATION_DN
57551	TAOK1	TAO kinase 1							GRAESSMANN_APOPTOSIS_BY_DOXORUBICIN_DN						CUI_TCF21_TARGETS_2_DN																				GARY_CD5_TARGETS_UP						JOHNSTONE_PARVB_TARGETS_3_DN
55297	CCDC91	coiled-coil domain containing 91							GRAESSMANN_APOPTOSIS_BY_DOXORUBICIN_DN							RODRIGUES_THYROID_CARCINOMA_POORLY_DIFFERENTIATED_DN		ACEVEDO_LIVER_CANCER_UP												ACEVEDO_LIVER_TUMOR_VS_NORMAL_ADJACENT_TISSUE_UP
51322	WAC	WW domain containing adaptor with coiled-coil							GRAESSMANN_APOPTOSIS_BY_DOXORUBICIN_DN							RODRIGUES_THYROID_CARCINOMA_POORLY_DIFFERENTIATED_DN			MARSON_BOUND_BY_FOXP3_UNSTIMULATED																GARY_CD5_TARGETS_UP						JOHNSTONE_PARVB_TARGETS_3_DN		GOBERT_OLIGODENDROCYTE_DIFFERENTIATION_DN
4763	NF1	neurofibromin 1							GRAESSMANN_APOPTOSIS_BY_DOXORUBICIN_DN							RODRIGUES_THYROID_CARCINOMA_POORLY_DIFFERENTIATED_DN								ONKEN_UVEAL_MELANOMA_UP			DODD_NASOPHARYNGEAL_CARCINOMA_DN						SHEN_SMARCA2_TARGETS_UP		GARY_CD5_TARGETS_UP													PUJANA_CHEK2_PCC_NETWORK
58526	MID1IP1	MID1 interacting protein 1 (gastrulation specific G12 homolog (zebrafish))							GRAESSMANN_APOPTOSIS_BY_DOXORUBICIN_DN								KRIGE_RESPONSE_TO_TOSEDOSTAT_24HR_UP			KUMAR_TARGETS_OF_MLL_AF9_FUSION					KRIGE_RESPONSE_TO_TOSEDOSTAT_6HR_UP					ACEVEDO_LIVER_TUMOR_VS_NORMAL_ADJACENT_TISSUE_UP					GARY_CD5_TARGETS_UP
51315	KRCC1	lysine-rich coiled-coil 1							GRAESSMANN_APOPTOSIS_BY_DOXORUBICIN_DN								KRIGE_RESPONSE_TO_TOSEDOSTAT_24HR_UP								KRIGE_RESPONSE_TO_TOSEDOSTAT_6HR_UP								SHEN_SMARCA2_TARGETS_UP														ZWANG_TRANSIENTLY_UP_BY_1ST_EGF_PULSE_ONLY
51621	KLF13	Kruppel-like factor 13							GRAESSMANN_APOPTOSIS_BY_DOXORUBICIN_DN									ACEVEDO_LIVER_CANCER_UP												ACEVEDO_LIVER_TUMOR_VS_NORMAL_ADJACENT_TISSUE_UP							LEE_DIFFERENTIATING_T_LYMPHOCYTE						GOBERT_OLIGODENDROCYTE_DIFFERENTIATION_DN
79673	ZNF329	zinc finger protein 329							GRAESSMANN_APOPTOSIS_BY_DOXORUBICIN_DN									ACEVEDO_LIVER_CANCER_UP												ACEVEDO_LIVER_TUMOR_VS_NORMAL_ADJACENT_TISSUE_UP
11243	PMF1	polyamine-modulated factor 1							GRAESSMANN_APOPTOSIS_BY_DOXORUBICIN_DN									ACEVEDO_LIVER_CANCER_UP
79156	PLEKHF1	pleckstrin homology domain containing, family F (with FYVE domain) member 1							GRAESSMANN_APOPTOSIS_BY_DOXORUBICIN_DN										MARSON_BOUND_BY_FOXP3_UNSTIMULATED
128338	DRAM2	DNA-damage regulated autophagy modulator 2							GRAESSMANN_APOPTOSIS_BY_DOXORUBICIN_DN													BENPORATH_NANOG_TARGETS																						MARSON_BOUND_BY_FOXP3_STIMULATED		NUYTTEN_NIPP1_TARGETS_UP
26608	TBL2	transducin (beta)-like 2							GRAESSMANN_APOPTOSIS_BY_DOXORUBICIN_DN															ONKEN_UVEAL_MELANOMA_UP		KOINUMA_TARGETS_OF_SMAD2_OR_SMAD3				ACEVEDO_LIVER_TUMOR_VS_NORMAL_ADJACENT_TISSUE_UP						ENK_UV_RESPONSE_KERATINOCYTE_DN
50807	ASAP1	ArfGAP with SH3 domain, ankyrin repeat and PH domain 1							GRAESSMANN_APOPTOSIS_BY_DOXORUBICIN_DN															ONKEN_UVEAL_MELANOMA_UP			DODD_NASOPHARYNGEAL_CARCINOMA_DN								GARY_CD5_TARGETS_UP
23529	CLCF1	cardiotrophin-like cytokine factor 1							GRAESSMANN_APOPTOSIS_BY_DOXORUBICIN_DN																	KOINUMA_TARGETS_OF_SMAD2_OR_SMAD3													MILI_PSEUDOPODIA_CHEMOTAXIS_DN										LOPEZ_MBD_TARGETS
22995	CEP152	centrosomal protein 152kDa							GRAESSMANN_APOPTOSIS_BY_DOXORUBICIN_DN																		DODD_NASOPHARYNGEAL_CARCINOMA_DN
57706	DENND1A	DENN/MADD domain containing 1A							GRAESSMANN_APOPTOSIS_BY_DOXORUBICIN_DN																		DODD_NASOPHARYNGEAL_CARCINOMA_DN
6839	SUV39H1	suppressor of variegation 3-9 homolog 1 (Drosophila)							GRAESSMANN_APOPTOSIS_BY_DOXORUBICIN_DN																					ACEVEDO_LIVER_TUMOR_VS_NORMAL_ADJACENT_TISSUE_UP
55240	STEAP3	STEAP family member 3, metalloreductase							GRAESSMANN_APOPTOSIS_BY_DOXORUBICIN_DN																														MILI_PSEUDOPODIA_CHEMOTAXIS_DN								ZWANG_TRANSIENTLY_UP_BY_1ST_EGF_PULSE_ONLY
9986	RCE1	RCE1 homolog, prenyl protein peptidase (S. cerevisiae)							GRAESSMANN_APOPTOSIS_BY_DOXORUBICIN_DN																																								LOPEZ_MBD_TARGETS
55755	CDK5RAP2	CDK5 regulatory subunit associated protein 2							GRAESSMANN_APOPTOSIS_BY_DOXORUBICIN_DN
55179	FAIM	Fas apoptotic inhibitory molecule							GRAESSMANN_APOPTOSIS_BY_DOXORUBICIN_DN
81932	HDHD3	haloacid dehalogenase-like hydrolase domain containing 3							GRAESSMANN_APOPTOSIS_BY_DOXORUBICIN_DN
23315	SLC9A8	solute carrier family 9 (sodium/hydrogen exchanger), member 8							GRAESSMANN_APOPTOSIS_BY_DOXORUBICIN_DN
57609	DIP2B	DIP2 disco-interacting protein 2 homolog B (Drosophila)							GRAESSMANN_APOPTOSIS_BY_DOXORUBICIN_DN
834	CASP1	caspase 1, apoptosis-related cysteine peptidase (interleukin 1, beta, convertase)								REACTOME_IMMUNE_SYSTEM	NUYTTEN_EZH2_TARGETS_UP	SCHLOSSER_SERUM_RESPONSE_DN		CHEN_METABOLIC_SYNDROM_NETWORK										ONKEN_UVEAL_MELANOMA_UP																						NUYTTEN_NIPP1_TARGETS_UP
1845	DUSP3	dual specificity phosphatase 3								REACTOME_IMMUNE_SYSTEM	NUYTTEN_EZH2_TARGETS_UP		FLECHNER_BIOPSY_KIDNEY_TRANSPLANT_OK_VS_DONOR_UP		CUI_TCF21_TARGETS_2_DN																																		LOPEZ_MBD_TARGETS
5698	PSMB9	proteasome (prosome, macropain) subunit, beta type, 9 (large multifunctional peptidase 2)								REACTOME_IMMUNE_SYSTEM	NUYTTEN_EZH2_TARGETS_UP		FLECHNER_BIOPSY_KIDNEY_TRANSPLANT_OK_VS_DONOR_UP											ONKEN_UVEAL_MELANOMA_UP							SPIELMAN_LYMPHOBLAST_EUROPEAN_VS_ASIAN_DN						LEE_DIFFERENTIATING_T_LYMPHOCYTE					GRAESSMANN_APOPTOSIS_BY_DOXORUBICIN_UP							LOPEZ_MBD_TARGETS
7097	TLR2	toll-like receptor 2								REACTOME_IMMUNE_SYSTEM	NUYTTEN_EZH2_TARGETS_UP			CHEN_METABOLIC_SYNDROM_NETWORK																									MILI_PSEUDOPODIA_CHEMOTAXIS_DN			GRAESSMANN_APOPTOSIS_BY_DOXORUBICIN_UP
6773	STAT2	signal transducer and activator of transcription 2, 113kDa								REACTOME_IMMUNE_SYSTEM	NUYTTEN_EZH2_TARGETS_UP						KRIGE_RESPONSE_TO_TOSEDOSTAT_24HR_UP								KRIGE_RESPONSE_TO_TOSEDOSTAT_6HR_UP																	GRAESSMANN_APOPTOSIS_BY_DOXORUBICIN_UP				NUYTTEN_NIPP1_TARGETS_UP	ZWANG_TRANSIENTLY_UP_BY_1ST_EGF_PULSE_ONLY
5705	PSMC5	proteasome (prosome, macropain) 26S subunit, ATPase, 5								REACTOME_IMMUNE_SYSTEM			FLECHNER_BIOPSY_KIDNEY_TRANSPLANT_OK_VS_DONOR_UP
916	CD3E	CD3e molecule, epsilon (CD3-TCR complex)								REACTOME_IMMUNE_SYSTEM				CHEN_METABOLIC_SYNDROM_NETWORK					MARSON_BOUND_BY_FOXP3_UNSTIMULATED	KUMAR_TARGETS_OF_MLL_AF9_FUSION																								MARSON_BOUND_BY_FOXP3_STIMULATED
929	CD14	CD14 molecule								REACTOME_IMMUNE_SYSTEM				CHEN_METABOLIC_SYNDROM_NETWORK													DODD_NASOPHARYNGEAL_CARCINOMA_DN															GRAESSMANN_APOPTOSIS_BY_DOXORUBICIN_UP
10379	IRF9	interferon regulatory factor 9								REACTOME_IMMUNE_SYSTEM								ACEVEDO_LIVER_CANCER_UP		KUMAR_TARGETS_OF_MLL_AF9_FUSION				ONKEN_UVEAL_MELANOMA_UP											GARY_CD5_TARGETS_UP												ZWANG_TRANSIENTLY_UP_BY_1ST_EGF_PULSE_ONLY
56992	KIF15	kinesin family member 15								REACTOME_IMMUNE_SYSTEM									MARSON_BOUND_BY_FOXP3_UNSTIMULATED			BENPORATH_NANOG_TARGETS					DODD_NASOPHARYNGEAL_CARCINOMA_DN													LASTOWSKA_NEUROBLASTOMA_COPY_NUMBER_DN	JOHNSTONE_PARVB_TARGETS_3_DN						ZWANG_TRANSIENTLY_UP_BY_1ST_EGF_PULSE_ONLY
10666	CD226	CD226 molecule								REACTOME_IMMUNE_SYSTEM									MARSON_BOUND_BY_FOXP3_UNSTIMULATED													ZHENG_BOUND_BY_FOXP3
51130	ASB3	ankyrin repeat and SOCS box containing 3								REACTOME_IMMUNE_SYSTEM									MARSON_BOUND_BY_FOXP3_UNSTIMULATED
3932	LCK	lymphocyte-specific protein tyrosine kinase								REACTOME_IMMUNE_SYSTEM										KUMAR_TARGETS_OF_MLL_AF9_FUSION															GARY_CD5_TARGETS_UP		LEE_DIFFERENTIATING_T_LYMPHOCYTE			LASTOWSKA_NEUROBLASTOMA_COPY_NUMBER_DN								PUJANA_CHEK2_PCC_NETWORK
3824	KLRD1	killer cell lectin-like receptor subfamily D, member 1								REACTOME_IMMUNE_SYSTEM										KUMAR_TARGETS_OF_MLL_AF9_FUSION
10120	ACTR1B	ARP1 actin-related protein 1 homolog B, centractin beta (yeast)								REACTOME_IMMUNE_SYSTEM											BLALOCK_ALZHEIMERS_DISEASE_DN	BENPORATH_NANOG_TARGETS																				GRAESSMANN_APOPTOSIS_BY_DOXORUBICIN_UP							LOPEZ_MBD_TARGETS
11213	IRAK3	interleukin-1 receptor-associated kinase 3								REACTOME_IMMUNE_SYSTEM																		OSMAN_BLADDER_CANCER_UP																					LOPEZ_MBD_TARGETS
50852	TRAT1	T cell receptor associated transmembrane adaptor 1								REACTOME_IMMUNE_SYSTEM																						ZHENG_BOUND_BY_FOXP3					LEE_DIFFERENTIATING_T_LYMPHOCYTE							MARSON_BOUND_BY_FOXP3_STIMULATED			ZWANG_TRANSIENTLY_UP_BY_1ST_EGF_PULSE_ONLY
3559	IL2RA	interleukin 2 receptor, alpha								REACTOME_IMMUNE_SYSTEM																						ZHENG_BOUND_BY_FOXP3												MARSON_BOUND_BY_FOXP3_STIMULATED
6891	TAP2	transporter 2, ATP-binding cassette, sub-family B (MDR/TAP)								REACTOME_IMMUNE_SYSTEM																													MILI_PSEUDOPODIA_CHEMOTAXIS_DN
975	CD81	CD81 molecule								REACTOME_IMMUNE_SYSTEM																																	GOBERT_OLIGODENDROCYTE_DIFFERENTIATION_DN
27040	LAT	linker for activation of T cells								REACTOME_IMMUNE_SYSTEM
10273	STUB1	STIP1 homology and U-box containing protein 1, E3 ubiquitin protein ligase								REACTOME_IMMUNE_SYSTEM
3811	KIR3DL1	killer cell immunoglobulin-like receptor, three domains, long cytoplasmic tail, 1								REACTOME_IMMUNE_SYSTEM
3802	KIR2DL1	killer cell immunoglobulin-like receptor, two domains, long cytoplasmic tail, 1								REACTOME_IMMUNE_SYSTEM
353376	TICAM2	toll-like receptor adaptor molecule 2								REACTOME_IMMUNE_SYSTEM
7100	TLR5	toll-like receptor 5								REACTOME_IMMUNE_SYSTEM
334	APLP2	amyloid beta (A4) precursor-like protein 2									NUYTTEN_EZH2_TARGETS_UP		FLECHNER_BIOPSY_KIDNEY_TRANSPLANT_OK_VS_DONOR_UP			RODRIGUES_THYROID_CARCINOMA_POORLY_DIFFERENTIATED_DN			MARSON_BOUND_BY_FOXP3_UNSTIMULATED		BLALOCK_ALZHEIMERS_DISEASE_DN	BENPORATH_NANOG_TARGETS																	MILI_PSEUDOPODIA_CHEMOTAXIS_DN	LASTOWSKA_NEUROBLASTOMA_COPY_NUMBER_DN	JOHNSTONE_PARVB_TARGETS_3_DN			MARSON_BOUND_BY_FOXP3_STIMULATED					LOPEZ_MBD_TARGETS
9235	IL32	interleukin 32									NUYTTEN_EZH2_TARGETS_UP		FLECHNER_BIOPSY_KIDNEY_TRANSPLANT_OK_VS_DONOR_UP					ACEVEDO_LIVER_CANCER_UP													SPIELMAN_LYMPHOBLAST_EUROPEAN_VS_ASIAN_DN
51131	PHF11	PHD finger protein 11									NUYTTEN_EZH2_TARGETS_UP			CHEN_METABOLIC_SYNDROM_NETWORK		RODRIGUES_THYROID_CARCINOMA_POORLY_DIFFERENTIATED_DN	KRIGE_RESPONSE_TO_TOSEDOSTAT_24HR_UP							ONKEN_UVEAL_MELANOMA_UP	KRIGE_RESPONSE_TO_TOSEDOSTAT_6HR_UP
55332	DRAM1	DNA-damage regulated autophagy modulator 1									NUYTTEN_EZH2_TARGETS_UP			CHEN_METABOLIC_SYNDROM_NETWORK													DODD_NASOPHARYNGEAL_CARCINOMA_DN			ACEVEDO_LIVER_TUMOR_VS_NORMAL_ADJACENT_TISSUE_UP												GRAESSMANN_APOPTOSIS_BY_DOXORUBICIN_UP				NUYTTEN_NIPP1_TARGETS_UP	ZWANG_TRANSIENTLY_UP_BY_1ST_EGF_PULSE_ONLY
57590	WDFY1	WD repeat and FYVE domain containing 1									NUYTTEN_EZH2_TARGETS_UP				CUI_TCF21_TARGETS_2_DN		KRIGE_RESPONSE_TO_TOSEDOSTAT_24HR_UP								KRIGE_RESPONSE_TO_TOSEDOSTAT_6HR_UP										GARY_CD5_TARGETS_UP								GOBERT_OLIGODENDROCYTE_DIFFERENTIATION_DN
64778	FNDC3B	fibronectin type III domain containing 3B									NUYTTEN_EZH2_TARGETS_UP				CUI_TCF21_TARGETS_2_DN			ACEVEDO_LIVER_CANCER_UP									DODD_NASOPHARYNGEAL_CARCINOMA_DN																				ZWANG_TRANSIENTLY_UP_BY_1ST_EGF_PULSE_ONLY
84458	LCOR	ligand dependent nuclear receptor corepressor									NUYTTEN_EZH2_TARGETS_UP				CUI_TCF21_TARGETS_2_DN			ACEVEDO_LIVER_CANCER_UP																						LASTOWSKA_NEUROBLASTOMA_COPY_NUMBER_DN
54625	PARP14	poly (ADP-ribose) polymerase family, member 14									NUYTTEN_EZH2_TARGETS_UP				CUI_TCF21_TARGETS_2_DN																															NUYTTEN_NIPP1_TARGETS_UP
10725	NFAT5	nuclear factor of activated T-cells 5, tonicity-responsive									NUYTTEN_EZH2_TARGETS_UP						KRIGE_RESPONSE_TO_TOSEDOSTAT_24HR_UP					BENPORATH_NANOG_TARGETS			KRIGE_RESPONSE_TO_TOSEDOSTAT_6HR_UP										GARY_CD5_TARGETS_UP									MARSON_BOUND_BY_FOXP3_STIMULATED
219285	SAMD9L	sterile alpha motif domain containing 9-like									NUYTTEN_EZH2_TARGETS_UP						KRIGE_RESPONSE_TO_TOSEDOSTAT_24HR_UP								KRIGE_RESPONSE_TO_TOSEDOSTAT_6HR_UP				MILI_PSEUDOPODIA_HAPTOTAXIS_UP														GOBERT_OLIGODENDROCYTE_DIFFERENTIATION_DN			NUYTTEN_NIPP1_TARGETS_UP
969	CD69	CD69 molecule									NUYTTEN_EZH2_TARGETS_UP						KRIGE_RESPONSE_TO_TOSEDOSTAT_24HR_UP								KRIGE_RESPONSE_TO_TOSEDOSTAT_6HR_UP							ZHENG_BOUND_BY_FOXP3		HADDAD_B_LYMPHOCYTE_PROGENITOR	GARY_CD5_TARGETS_UP
1901	S1PR1	sphingosine-1-phosphate receptor 1									NUYTTEN_EZH2_TARGETS_UP							ACEVEDO_LIVER_CANCER_UP		KUMAR_TARGETS_OF_MLL_AF9_FUSION	BLALOCK_ALZHEIMERS_DISEASE_DN									ACEVEDO_LIVER_TUMOR_VS_NORMAL_ADJACENT_TISSUE_UP		ZHENG_BOUND_BY_FOXP3
10099	TSPAN3	tetraspanin 3									NUYTTEN_EZH2_TARGETS_UP										BLALOCK_ALZHEIMERS_DISEASE_DN																								OSMAN_BLADDER_CANCER_DN				LOPEZ_MBD_TARGETS
10745	PHTF1	putative homeodomain transcription factor 1									NUYTTEN_EZH2_TARGETS_UP										BLALOCK_ALZHEIMERS_DISEASE_DN
79048	SECISBP2	SECIS binding protein 2									NUYTTEN_EZH2_TARGETS_UP											BENPORATH_NANOG_TARGETS						OSMAN_BLADDER_CANCER_UP																		NUYTTEN_NIPP1_TARGETS_UP
54809	SAMD9	sterile alpha motif domain containing 9									NUYTTEN_EZH2_TARGETS_UP															KOINUMA_TARGETS_OF_SMAD2_OR_SMAD3																				NUYTTEN_NIPP1_TARGETS_UP
91351	DDX60L	DEAD (Asp-Glu-Ala-Asp) box polypeptide 60-like									NUYTTEN_EZH2_TARGETS_UP																DODD_NASOPHARYNGEAL_CARCINOMA_DN																			NUYTTEN_NIPP1_TARGETS_UP
1185	CLCN6	chloride channel 6									NUYTTEN_EZH2_TARGETS_UP																												MILI_PSEUDOPODIA_CHEMOTAXIS_DN	LASTOWSKA_NEUROBLASTOMA_COPY_NUMBER_DN
5768	QSOX1	quiescin Q6 sulfhydryl oxidase 1									NUYTTEN_EZH2_TARGETS_UP																												MILI_PSEUDOPODIA_CHEMOTAXIS_DN			GRAESSMANN_APOPTOSIS_BY_DOXORUBICIN_UP							LOPEZ_MBD_TARGETS
7084	TK2	thymidine kinase 2, mitochondrial									NUYTTEN_EZH2_TARGETS_UP																															GRAESSMANN_APOPTOSIS_BY_DOXORUBICIN_UP
54464	XRN1	5'-3' exoribonuclease 1									NUYTTEN_EZH2_TARGETS_UP																																GOBERT_OLIGODENDROCYTE_DIFFERENTIATION_DN			NUYTTEN_NIPP1_TARGETS_UP
22898	DENND3	DENN/MADD domain containing 3									NUYTTEN_EZH2_TARGETS_UP
2621	GAS6	growth arrest-specific 6									NUYTTEN_EZH2_TARGETS_UP
928	CD9	CD9 molecule										SCHLOSSER_SERUM_RESPONSE_DN	FLECHNER_BIOPSY_KIDNEY_TRANSPLANT_OK_VS_DONOR_UP	CHEN_METABOLIC_SYNDROM_NETWORK				ACEVEDO_LIVER_CANCER_UP		KUMAR_TARGETS_OF_MLL_AF9_FUSION										ACEVEDO_LIVER_TUMOR_VS_NORMAL_ADJACENT_TISSUE_UP				HADDAD_B_LYMPHOCYTE_PROGENITOR					MILI_PSEUDOPODIA_CHEMOTAXIS_DN				GOBERT_OLIGODENDROCYTE_DIFFERENTIATION_DN
51100	SH3GLB1	SH3-domain GRB2-like endophilin B1										SCHLOSSER_SERUM_RESPONSE_DN			CUI_TCF21_TARGETS_2_DN		KRIGE_RESPONSE_TO_TOSEDOSTAT_24HR_UP			KUMAR_TARGETS_OF_MLL_AF9_FUSION					KRIGE_RESPONSE_TO_TOSEDOSTAT_6HR_UP				MILI_PSEUDOPODIA_HAPTOTAXIS_UP											LASTOWSKA_NEUROBLASTOMA_COPY_NUMBER_DN
1102	RCBTB2	regulator of chromosome condensation (RCC1) and BTB (POZ) domain containing protein 2										SCHLOSSER_SERUM_RESPONSE_DN					KRIGE_RESPONSE_TO_TOSEDOSTAT_24HR_UP								KRIGE_RESPONSE_TO_TOSEDOSTAT_6HR_UP						SPIELMAN_LYMPHOBLAST_EUROPEAN_VS_ASIAN_DN	ZHENG_BOUND_BY_FOXP3				ENK_UV_RESPONSE_KERATINOCYTE_DN
4035	LRP1	low density lipoprotein receptor-related protein 1										SCHLOSSER_SERUM_RESPONSE_DN												ONKEN_UVEAL_MELANOMA_UP															MILI_PSEUDOPODIA_CHEMOTAXIS_DN								ZWANG_TRANSIENTLY_UP_BY_1ST_EGF_PULSE_ONLY
81614	NIPA2	non imprinted in Prader-Willi/Angelman syndrome 2										SCHLOSSER_SERUM_RESPONSE_DN												ONKEN_UVEAL_MELANOMA_UP
114932	MRFAP1L1	Morf4 family associated protein 1-like 1										SCHLOSSER_SERUM_RESPONSE_DN																					SHEN_SMARCA2_TARGETS_UP							LASTOWSKA_NEUROBLASTOMA_COPY_NUMBER_DN
1822	ATN1	atrophin 1										SCHLOSSER_SERUM_RESPONSE_DN
387082	SUMO4	SMT3 suppressor of mif two 3 homolog 4 (S. cerevisiae)										SCHLOSSER_SERUM_RESPONSE_DN
4094	MAF	v-maf musculoaponeurotic fibrosarcoma oncogene homolog (avian)											FLECHNER_BIOPSY_KIDNEY_TRANSPLANT_OK_VS_DONOR_UP			RODRIGUES_THYROID_CARCINOMA_POORLY_DIFFERENTIATED_DN																											GOBERT_OLIGODENDROCYTE_DIFFERENTIATION_DN
1428	CRYM	crystallin, mu											FLECHNER_BIOPSY_KIDNEY_TRANSPLANT_OK_VS_DONOR_UP								BLALOCK_ALZHEIMERS_DISEASE_DN																										ZWANG_TRANSIENTLY_UP_BY_1ST_EGF_PULSE_ONLY
23049	SMG1	smg-1 homolog, phosphatidylinositol 3-kinase-related kinase (C. elegans)											FLECHNER_BIOPSY_KIDNEY_TRANSPLANT_OK_VS_DONOR_UP														DODD_NASOPHARYNGEAL_CARCINOMA_DN	OSMAN_BLADDER_CANCER_UP																			ZWANG_TRANSIENTLY_UP_BY_1ST_EGF_PULSE_ONLY
5800	PTPRO	protein tyrosine phosphatase, receptor type, O												CHEN_METABOLIC_SYNDROM_NETWORK	CUI_TCF21_TARGETS_2_DN																SPIELMAN_LYMPHOBLAST_EUROPEAN_VS_ASIAN_DN
84898	PLXDC2	plexin domain containing 2												CHEN_METABOLIC_SYNDROM_NETWORK	CUI_TCF21_TARGETS_2_DN																												GOBERT_OLIGODENDROCYTE_DIFFERENTIATION_DN				ZWANG_TRANSIENTLY_UP_BY_1ST_EGF_PULSE_ONLY
23136	EPB41L3	erythrocyte membrane protein band 4.1-like 3												CHEN_METABOLIC_SYNDROM_NETWORK			KRIGE_RESPONSE_TO_TOSEDOSTAT_24HR_UP								KRIGE_RESPONSE_TO_TOSEDOSTAT_6HR_UP		DODD_NASOPHARYNGEAL_CARCINOMA_DN
5996	RGS1	regulator of G-protein signaling 1												CHEN_METABOLIC_SYNDROM_NETWORK				ACEVEDO_LIVER_CANCER_UP	MARSON_BOUND_BY_FOXP3_UNSTIMULATED													ZHENG_BOUND_BY_FOXP3			GARY_CD5_TARGETS_UP									MARSON_BOUND_BY_FOXP3_STIMULATED
91574	C12orf65	chromosome 12 open reading frame 65												CHEN_METABOLIC_SYNDROM_NETWORK				ACEVEDO_LIVER_CANCER_UP									DODD_NASOPHARYNGEAL_CARCINOMA_DN														JOHNSTONE_PARVB_TARGETS_3_DN
2896	GRN	granulin												CHEN_METABOLIC_SYNDROM_NETWORK				ACEVEDO_LIVER_CANCER_UP												ACEVEDO_LIVER_TUMOR_VS_NORMAL_ADJACENT_TISSUE_UP									MILI_PSEUDOPODIA_CHEMOTAXIS_DN
51313	FAM198B	family with sequence similarity 198, member B												CHEN_METABOLIC_SYNDROM_NETWORK							BLALOCK_ALZHEIMERS_DISEASE_DN						DODD_NASOPHARYNGEAL_CARCINOMA_DN
9547	CXCL14	chemokine (C-X-C motif) ligand 14												CHEN_METABOLIC_SYNDROM_NETWORK							BLALOCK_ALZHEIMERS_DISEASE_DN
79836	LONRF3	LON peptidase N-terminal domain and ring finger 3												CHEN_METABOLIC_SYNDROM_NETWORK														OSMAN_BLADDER_CANCER_UP
79415	C17orf62	chromosome 17 open reading frame 62												CHEN_METABOLIC_SYNDROM_NETWORK																ACEVEDO_LIVER_TUMOR_VS_NORMAL_ADJACENT_TISSUE_UP									MILI_PSEUDOPODIA_CHEMOTAXIS_DN
114836	SLAMF6	SLAM family member 6												CHEN_METABOLIC_SYNDROM_NETWORK																		ZHENG_BOUND_BY_FOXP3
29952	DPP7	dipeptidyl-peptidase 7												CHEN_METABOLIC_SYNDROM_NETWORK																					GARY_CD5_TARGETS_UP							GRAESSMANN_APOPTOSIS_BY_DOXORUBICIN_UP
4240	MFGE8	milk fat globule-EGF factor 8 protein												CHEN_METABOLIC_SYNDROM_NETWORK																												GRAESSMANN_APOPTOSIS_BY_DOXORUBICIN_UP
150290	DUSP18	dual specificity phosphatase 18												CHEN_METABOLIC_SYNDROM_NETWORK																																	ZWANG_TRANSIENTLY_UP_BY_1ST_EGF_PULSE_ONLY
79845	RNF122	ring finger protein 122												CHEN_METABOLIC_SYNDROM_NETWORK
23166	STAB1	stabilin 1												CHEN_METABOLIC_SYNDROM_NETWORK
84247	LDOC1L	leucine zipper, down-regulated in cancer 1-like												CHEN_METABOLIC_SYNDROM_NETWORK
9909	DENND4B	DENN/MADD domain containing 4B												CHEN_METABOLIC_SYNDROM_NETWORK
432	ASGR1	asialoglycoprotein receptor 1												CHEN_METABOLIC_SYNDROM_NETWORK
154214	RNF217	ring finger protein 217												CHEN_METABOLIC_SYNDROM_NETWORK
170371	C10orf128	chromosome 10 open reading frame 128												CHEN_METABOLIC_SYNDROM_NETWORK
84689	MS4A14	membrane-spanning 4-domains, subfamily A, member 14												CHEN_METABOLIC_SYNDROM_NETWORK
9849	ZNF518A	zinc finger protein 518A													CUI_TCF21_TARGETS_2_DN	RODRIGUES_THYROID_CARCINOMA_POORLY_DIFFERENTIATED_DN	KRIGE_RESPONSE_TO_TOSEDOSTAT_24HR_UP								KRIGE_RESPONSE_TO_TOSEDOSTAT_6HR_UP															LASTOWSKA_NEUROBLASTOMA_COPY_NUMBER_DN									LOPEZ_MBD_TARGETS
113263	GLCCI1	glucocorticoid induced transcript 1													CUI_TCF21_TARGETS_2_DN	RODRIGUES_THYROID_CARCINOMA_POORLY_DIFFERENTIATED_DN																ZHENG_BOUND_BY_FOXP3			GARY_CD5_TARGETS_UP							GRAESSMANN_APOPTOSIS_BY_DOXORUBICIN_UP					ZWANG_TRANSIENTLY_UP_BY_1ST_EGF_PULSE_ONLY
121512	FGD4	FYVE, RhoGEF and PH domain containing 4													CUI_TCF21_TARGETS_2_DN	RODRIGUES_THYROID_CARCINOMA_POORLY_DIFFERENTIATED_DN																															ZWANG_TRANSIENTLY_UP_BY_1ST_EGF_PULSE_ONLY
10791	VAMP5	vesicle-associated membrane protein 5 (myobrevin)													CUI_TCF21_TARGETS_2_DN			ACEVEDO_LIVER_CANCER_UP												ACEVEDO_LIVER_TUMOR_VS_NORMAL_ADJACENT_TISSUE_UP
55754	TMEM30A	transmembrane protein 30A													CUI_TCF21_TARGETS_2_DN				MARSON_BOUND_BY_FOXP3_UNSTIMULATED	KUMAR_TARGETS_OF_MLL_AF9_FUSION																							GOBERT_OLIGODENDROCYTE_DIFFERENTIATION_DN	MARSON_BOUND_BY_FOXP3_STIMULATED
64776	C11orf1	chromosome 11 open reading frame 1													CUI_TCF21_TARGETS_2_DN				MARSON_BOUND_BY_FOXP3_UNSTIMULATED			BENPORATH_NANOG_TARGETS				KOINUMA_TARGETS_OF_SMAD2_OR_SMAD3														LASTOWSKA_NEUROBLASTOMA_COPY_NUMBER_DN			GOBERT_OLIGODENDROCYTE_DIFFERENTIATION_DN	MARSON_BOUND_BY_FOXP3_STIMULATED
94241	TP53INP1	tumor protein p53 inducible nuclear protein 1													CUI_TCF21_TARGETS_2_DN				MARSON_BOUND_BY_FOXP3_UNSTIMULATED													ZHENG_BOUND_BY_FOXP3										GRAESSMANN_APOPTOSIS_BY_DOXORUBICIN_UP	GOBERT_OLIGODENDROCYTE_DIFFERENTIATION_DN
29761	USP25	ubiquitin specific peptidase 25													CUI_TCF21_TARGETS_2_DN						BLALOCK_ALZHEIMERS_DISEASE_DN
4905	NSF	N-ethylmaleimide-sensitive factor													CUI_TCF21_TARGETS_2_DN																SPIELMAN_LYMPHOBLAST_EUROPEAN_VS_ASIAN_DN																		LOPEZ_MBD_TARGETS
9172	MYOM2	myomesin (M-protein) 2, 165kDa													CUI_TCF21_TARGETS_2_DN																																ZWANG_TRANSIENTLY_UP_BY_1ST_EGF_PULSE_ONLY
83478	ARHGAP24	Rho GTPase activating protein 24													CUI_TCF21_TARGETS_2_DN																																ZWANG_TRANSIENTLY_UP_BY_1ST_EGF_PULSE_ONLY
25778	DSTYK	dual serine/threonine and tyrosine protein kinase													CUI_TCF21_TARGETS_2_DN
51267	CLEC1A	C-type lectin domain family 1, member A													CUI_TCF21_TARGETS_2_DN
9249	DHRS3	dehydrogenase/reductase (SDR family) member 3														RODRIGUES_THYROID_CARCINOMA_POORLY_DIFFERENTIATED_DN			MARSON_BOUND_BY_FOXP3_UNSTIMULATED			BENPORATH_NANOG_TARGETS				KOINUMA_TARGETS_OF_SMAD2_OR_SMAD3										ENK_UV_RESPONSE_KERATINOCYTE_DN
94103	ORMDL3	ORM1-like 3 (S. cerevisiae)														RODRIGUES_THYROID_CARCINOMA_POORLY_DIFFERENTIATED_DN				KUMAR_TARGETS_OF_MLL_AF9_FUSION						KOINUMA_TARGETS_OF_SMAD2_OR_SMAD3
221178	SPATA13	spermatogenesis associated 13														RODRIGUES_THYROID_CARCINOMA_POORLY_DIFFERENTIATED_DN				KUMAR_TARGETS_OF_MLL_AF9_FUSION																	LEE_DIFFERENTIATING_T_LYMPHOCYTE
9217	VAPB	VAMP (vesicle-associated membrane protein)-associated protein B and C														RODRIGUES_THYROID_CARCINOMA_POORLY_DIFFERENTIATED_DN						BENPORATH_NANOG_TARGETS
54832	VPS13C	vacuolar protein sorting 13 homolog C (S. cerevisiae)														RODRIGUES_THYROID_CARCINOMA_POORLY_DIFFERENTIATED_DN										KOINUMA_TARGETS_OF_SMAD2_OR_SMAD3							SHEN_SMARCA2_TARGETS_UP
222068	TMED4	transmembrane emp24 protein transport domain containing 4														RODRIGUES_THYROID_CARCINOMA_POORLY_DIFFERENTIATED_DN											DODD_NASOPHARYNGEAL_CARCINOMA_DN			ACEVEDO_LIVER_TUMOR_VS_NORMAL_ADJACENT_TISSUE_UP					GARY_CD5_TARGETS_UP						JOHNSTONE_PARVB_TARGETS_3_DN
57674	RNF213	ring finger protein 213														RODRIGUES_THYROID_CARCINOMA_POORLY_DIFFERENTIATED_DN											DODD_NASOPHARYNGEAL_CARCINOMA_DN																			NUYTTEN_NIPP1_TARGETS_UP	ZWANG_TRANSIENTLY_UP_BY_1ST_EGF_PULSE_ONLY
81606	LBH	limb bud and heart development homolog (mouse)														RODRIGUES_THYROID_CARCINOMA_POORLY_DIFFERENTIATED_DN																		HADDAD_B_LYMPHOCYTE_PROGENITOR											OSMAN_BLADDER_CANCER_DN
8396	PIP4K2B	phosphatidylinositol-5-phosphate 4-kinase, type II, beta														RODRIGUES_THYROID_CARCINOMA_POORLY_DIFFERENTIATED_DN																				ENK_UV_RESPONSE_KERATINOCYTE_DN		DAZARD_RESPONSE_TO_UV_NHEK_DN
124565	SLC38A10	solute carrier family 38, member 10														RODRIGUES_THYROID_CARCINOMA_POORLY_DIFFERENTIATED_DN																							MILI_PSEUDOPODIA_CHEMOTAXIS_DN
28955	DEXI	Dexi homolog (mouse)														RODRIGUES_THYROID_CARCINOMA_POORLY_DIFFERENTIATED_DN																										GRAESSMANN_APOPTOSIS_BY_DOXORUBICIN_UP
8824	CES2	carboxylesterase 2														RODRIGUES_THYROID_CARCINOMA_POORLY_DIFFERENTIATED_DN																															ZWANG_TRANSIENTLY_UP_BY_1ST_EGF_PULSE_ONLY
284443	ZNF493	zinc finger protein 493														RODRIGUES_THYROID_CARCINOMA_POORLY_DIFFERENTIATED_DN
645644	FLJ42627	uncharacterized LOC645644														RODRIGUES_THYROID_CARCINOMA_POORLY_DIFFERENTIATED_DN
9701	PPP6R2	protein phosphatase 6, regulatory subunit 2														RODRIGUES_THYROID_CARCINOMA_POORLY_DIFFERENTIATED_DN
254048	UBN2	ubinuclein 2														RODRIGUES_THYROID_CARCINOMA_POORLY_DIFFERENTIATED_DN
84085	FBXO30	F-box protein 30														RODRIGUES_THYROID_CARCINOMA_POORLY_DIFFERENTIATED_DN
11311	VPS45	vacuolar protein sorting 45 homolog (S. cerevisiae)															KRIGE_RESPONSE_TO_TOSEDOSTAT_24HR_UP	ACEVEDO_LIVER_CANCER_UP	MARSON_BOUND_BY_FOXP3_UNSTIMULATED						KRIGE_RESPONSE_TO_TOSEDOSTAT_6HR_UP					ACEVEDO_LIVER_TUMOR_VS_NORMAL_ADJACENT_TISSUE_UP			SHEN_SMARCA2_TARGETS_UP
1831	TSC22D3	TSC22 domain family, member 3															KRIGE_RESPONSE_TO_TOSEDOSTAT_24HR_UP		MARSON_BOUND_BY_FOXP3_UNSTIMULATED						KRIGE_RESPONSE_TO_TOSEDOSTAT_6HR_UP
4717	NDUFC1	NADH dehydrogenase (ubiquinone) 1, subcomplex unknown, 1, 6kDa															KRIGE_RESPONSE_TO_TOSEDOSTAT_24HR_UP		MARSON_BOUND_BY_FOXP3_UNSTIMULATED																														LOPEZ_MBD_TARGETS
10509	SEMA4B	sema domain, immunoglobulin domain (Ig), transmembrane domain (TM) and short cytoplasmic domain, (semaphorin) 4B															KRIGE_RESPONSE_TO_TOSEDOSTAT_24HR_UP			KUMAR_TARGETS_OF_MLL_AF9_FUSION
9141	PDCD5	programmed cell death 5															KRIGE_RESPONSE_TO_TOSEDOSTAT_24HR_UP				BLALOCK_ALZHEIMERS_DISEASE_DN				KRIGE_RESPONSE_TO_TOSEDOSTAT_6HR_UP		DODD_NASOPHARYNGEAL_CARCINOMA_DN		MILI_PSEUDOPODIA_HAPTOTAXIS_UP	ACEVEDO_LIVER_TUMOR_VS_NORMAL_ADJACENT_TISSUE_UP																			LOPEZ_MBD_TARGETS
10962	MLLT11	myeloid/lymphoid or mixed-lineage leukemia (trithorax homolog, Drosophila); translocated to, 11															KRIGE_RESPONSE_TO_TOSEDOSTAT_24HR_UP				BLALOCK_ALZHEIMERS_DISEASE_DN				KRIGE_RESPONSE_TO_TOSEDOSTAT_6HR_UP		DODD_NASOPHARYNGEAL_CARCINOMA_DN																GOBERT_OLIGODENDROCYTE_DIFFERENTIATION_DN			NUYTTEN_NIPP1_TARGETS_UP
55680	RUFY2	RUN and FYVE domain containing 2															KRIGE_RESPONSE_TO_TOSEDOSTAT_24HR_UP							ONKEN_UVEAL_MELANOMA_UP	KRIGE_RESPONSE_TO_TOSEDOSTAT_6HR_UP															LASTOWSKA_NEUROBLASTOMA_COPY_NUMBER_DN	JOHNSTONE_PARVB_TARGETS_3_DN
57168	ASPHD2	aspartate beta-hydroxylase domain containing 2															KRIGE_RESPONSE_TO_TOSEDOSTAT_24HR_UP								KRIGE_RESPONSE_TO_TOSEDOSTAT_6HR_UP			OSMAN_BLADDER_CANCER_UP
117289	TAGAP	T-cell activation RhoGTPase activating protein															KRIGE_RESPONSE_TO_TOSEDOSTAT_24HR_UP								KRIGE_RESPONSE_TO_TOSEDOSTAT_6HR_UP										GARY_CD5_TARGETS_UP		LEE_DIFFERENTIATING_T_LYMPHOCYTE								OSMAN_BLADDER_CANCER_DN		ZWANG_TRANSIENTLY_UP_BY_1ST_EGF_PULSE_ONLY
128387	TATDN3	TatD DNase domain containing 3															KRIGE_RESPONSE_TO_TOSEDOSTAT_24HR_UP								KRIGE_RESPONSE_TO_TOSEDOSTAT_6HR_UP																					NUYTTEN_NIPP1_TARGETS_UP
55356	SLC22A15	solute carrier family 22, member 15															KRIGE_RESPONSE_TO_TOSEDOSTAT_24HR_UP								KRIGE_RESPONSE_TO_TOSEDOSTAT_6HR_UP
55204	GOLPH3L	golgi phosphoprotein 3-like																ACEVEDO_LIVER_CANCER_UP	MARSON_BOUND_BY_FOXP3_UNSTIMULATED											ACEVEDO_LIVER_TUMOR_VS_NORMAL_ADJACENT_TISSUE_UP													GOBERT_OLIGODENDROCYTE_DIFFERENTIATION_DN	MARSON_BOUND_BY_FOXP3_STIMULATED			ZWANG_TRANSIENTLY_UP_BY_1ST_EGF_PULSE_ONLY
56900	TMEM167B	transmembrane protein 167B																ACEVEDO_LIVER_CANCER_UP	MARSON_BOUND_BY_FOXP3_UNSTIMULATED											ACEVEDO_LIVER_TUMOR_VS_NORMAL_ADJACENT_TISSUE_UP														MARSON_BOUND_BY_FOXP3_STIMULATED
914	CD2	CD2 molecule																ACEVEDO_LIVER_CANCER_UP		KUMAR_TARGETS_OF_MLL_AF9_FUSION																	LEE_DIFFERENTIATING_T_LYMPHOCYTE							MARSON_BOUND_BY_FOXP3_STIMULATED
55646	LYAR	Ly1 antibody reactive homolog (mouse)																ACEVEDO_LIVER_CANCER_UP									DODD_NASOPHARYNGEAL_CARCINOMA_DN			ACEVEDO_LIVER_TUMOR_VS_NORMAL_ADJACENT_TISSUE_UP										LASTOWSKA_NEUROBLASTOMA_COPY_NUMBER_DN
55006	TRMT61B	tRNA methyltransferase 61 homolog B (S. cerevisiae)																ACEVEDO_LIVER_CANCER_UP									DODD_NASOPHARYNGEAL_CARCINOMA_DN
29920	PYCR2	pyrroline-5-carboxylate reductase family, member 2																ACEVEDO_LIVER_CANCER_UP												ACEVEDO_LIVER_TUMOR_VS_NORMAL_ADJACENT_TISSUE_UP
79685	SAP30L	SAP30-like																ACEVEDO_LIVER_CANCER_UP												ACEVEDO_LIVER_TUMOR_VS_NORMAL_ADJACENT_TISSUE_UP
164022	PPIAL4A	peptidylprolyl isomerase A (cyclophilin A)-like 4A																ACEVEDO_LIVER_CANCER_UP												ACEVEDO_LIVER_TUMOR_VS_NORMAL_ADJACENT_TISSUE_UP
8751	ADAM15	ADAM metallopeptidase domain 15																ACEVEDO_LIVER_CANCER_UP																								GRAESSMANN_APOPTOSIS_BY_DOXORUBICIN_UP
4952	OCRL	oculocerebrorenal syndrome of Lowe																ACEVEDO_LIVER_CANCER_UP
84824	FCRLA	Fc receptor-like A																	MARSON_BOUND_BY_FOXP3_UNSTIMULATED	KUMAR_TARGETS_OF_MLL_AF9_FUSION																									OSMAN_BLADDER_CANCER_DN
5223	PGAM1	phosphoglycerate mutase 1 (brain)																	MARSON_BOUND_BY_FOXP3_UNSTIMULATED		BLALOCK_ALZHEIMERS_DISEASE_DN			ONKEN_UVEAL_MELANOMA_UP																LASTOWSKA_NEUROBLASTOMA_COPY_NUMBER_DN
81573	ANKRD13C	ankyrin repeat domain 13C																	MARSON_BOUND_BY_FOXP3_UNSTIMULATED										MILI_PSEUDOPODIA_HAPTOTAXIS_UP											LASTOWSKA_NEUROBLASTOMA_COPY_NUMBER_DN
57062	DDX24	DEAD (Asp-Glu-Ala-Asp) box polypeptide 24																	MARSON_BOUND_BY_FOXP3_UNSTIMULATED												SPIELMAN_LYMPHOBLAST_EUROPEAN_VS_ASIAN_DN
11112	HIBADH	3-hydroxyisobutyrate dehydrogenase																	MARSON_BOUND_BY_FOXP3_UNSTIMULATED																GARY_CD5_TARGETS_UP
8569	MKNK1	MAP kinase interacting serine/threonine kinase 1																	MARSON_BOUND_BY_FOXP3_UNSTIMULATED																					LASTOWSKA_NEUROBLASTOMA_COPY_NUMBER_DN
57118	CAMK1D	calcium/calmodulin-dependent protein kinase ID																	MARSON_BOUND_BY_FOXP3_UNSTIMULATED																									MARSON_BOUND_BY_FOXP3_STIMULATED
7391	USF1	upstream transcription factor 1																	MARSON_BOUND_BY_FOXP3_UNSTIMULATED																									MARSON_BOUND_BY_FOXP3_STIMULATED
10800	CYSLTR1	cysteinyl leukotriene receptor 1																	MARSON_BOUND_BY_FOXP3_UNSTIMULATED
8320	EOMES	eomesodermin																		KUMAR_TARGETS_OF_MLL_AF9_FUSION		BENPORATH_NANOG_TARGETS
58476	TP53INP2	tumor protein p53 inducible nuclear protein 2																		KUMAR_TARGETS_OF_MLL_AF9_FUSION									MILI_PSEUDOPODIA_HAPTOTAXIS_UP										MILI_PSEUDOPODIA_CHEMOTAXIS_DN			GRAESSMANN_APOPTOSIS_BY_DOXORUBICIN_UP	GOBERT_OLIGODENDROCYTE_DIFFERENTIATION_DN				ZWANG_TRANSIENTLY_UP_BY_1ST_EGF_PULSE_ONLY
122060	SLAIN1	SLAIN motif family, member 1																		KUMAR_TARGETS_OF_MLL_AF9_FUSION																						GRAESSMANN_APOPTOSIS_BY_DOXORUBICIN_UP
643	CXCR5	chemokine (C-X-C motif) receptor 5																		KUMAR_TARGETS_OF_MLL_AF9_FUSION																								MARSON_BOUND_BY_FOXP3_STIMULATED
5790	PTPRCAP	protein tyrosine phosphatase, receptor type, C-associated protein																		KUMAR_TARGETS_OF_MLL_AF9_FUSION
923	CD6	CD6 molecule																		KUMAR_TARGETS_OF_MLL_AF9_FUSION
921	CD5	CD5 molecule																		KUMAR_TARGETS_OF_MLL_AF9_FUSION
22826	DNAJC8	DnaJ (Hsp40) homolog, subfamily C, member 8																			BLALOCK_ALZHEIMERS_DISEASE_DN	BENPORATH_NANOG_TARGETS																		LASTOWSKA_NEUROBLASTOMA_COPY_NUMBER_DN				MARSON_BOUND_BY_FOXP3_STIMULATED					LOPEZ_MBD_TARGETS
29796	UQCR10	ubiquinol-cytochrome c reductase, complex III subunit X																			BLALOCK_ALZHEIMERS_DISEASE_DN	BENPORATH_NANOG_TARGETS
9183	ZW10	ZW10, kinetochore associated, homolog (Drosophila)																			BLALOCK_ALZHEIMERS_DISEASE_DN					KOINUMA_TARGETS_OF_SMAD2_OR_SMAD3					SPIELMAN_LYMPHOBLAST_EUROPEAN_VS_ASIAN_DN
4338	MOCS2	molybdenum cofactor synthesis 2																			BLALOCK_ALZHEIMERS_DISEASE_DN												SHEN_SMARCA2_TARGETS_UP
267	AMFR	autocrine motility factor receptor																			BLALOCK_ALZHEIMERS_DISEASE_DN														GARY_CD5_TARGETS_UP
6844	VAMP2	vesicle-associated membrane protein 2 (synaptobrevin 2)																			BLALOCK_ALZHEIMERS_DISEASE_DN														GARY_CD5_TARGETS_UP
64112	MOAP1	modulator of apoptosis 1																			BLALOCK_ALZHEIMERS_DISEASE_DN																					GRAESSMANN_APOPTOSIS_BY_DOXORUBICIN_UP					ZWANG_TRANSIENTLY_UP_BY_1ST_EGF_PULSE_ONLY
4753	NELL2	NEL-like 2 (chicken)																			BLALOCK_ALZHEIMERS_DISEASE_DN																								OSMAN_BLADDER_CANCER_DN
54681	P4HTM	prolyl 4-hydroxylase, transmembrane (endoplasmic reticulum)																			BLALOCK_ALZHEIMERS_DISEASE_DN																										ZWANG_TRANSIENTLY_UP_BY_1ST_EGF_PULSE_ONLY
51195	RAPGEFL1	Rap guanine nucleotide exchange factor (GEF)-like 1																			BLALOCK_ALZHEIMERS_DISEASE_DN																										ZWANG_TRANSIENTLY_UP_BY_1ST_EGF_PULSE_ONLY
166	AES	amino-terminal enhancer of split																			BLALOCK_ALZHEIMERS_DISEASE_DN
6785	ELOVL4	ELOVL fatty acid elongase 4																			BLALOCK_ALZHEIMERS_DISEASE_DN
80344	DCAF11	DDB1 and CUL4 associated factor 11																				BENPORATH_NANOG_TARGETS				KOINUMA_TARGETS_OF_SMAD2_OR_SMAD3
55771	PRR11	proline rich 11																				BENPORATH_NANOG_TARGETS					DODD_NASOPHARYNGEAL_CARCINOMA_DN	OSMAN_BLADDER_CANCER_UP
6161	RPL32	ribosomal protein L32																				BENPORATH_NANOG_TARGETS																		LASTOWSKA_NEUROBLASTOMA_COPY_NUMBER_DN					OSMAN_BLADDER_CANCER_DN
56949	XAB2	XPA binding protein 2																				BENPORATH_NANOG_TARGETS																				GRAESSMANN_APOPTOSIS_BY_DOXORUBICIN_UP
29035	C16orf72	chromosome 16 open reading frame 72																				BENPORATH_NANOG_TARGETS																									ZWANG_TRANSIENTLY_UP_BY_1ST_EGF_PULSE_ONLY
1265	CNN2	calponin 2																				BENPORATH_NANOG_TARGETS
55072	RNF31	ring finger protein 31																				BENPORATH_NANOG_TARGETS
84134	TOMM40L	translocase of outer mitochondrial membrane 40 homolog (yeast)-like																				BENPORATH_NANOG_TARGETS
90843	TCEAL8	transcription elongation factor A (SII)-like 8																				BENPORATH_NANOG_TARGETS
56975	FAM20C	family with sequence similarity 20, member C																				BENPORATH_NANOG_TARGETS
388677	NOTCH2NL	notch 2 N-terminal like																						ONKEN_UVEAL_MELANOMA_UP		KOINUMA_TARGETS_OF_SMAD2_OR_SMAD3																				NUYTTEN_NIPP1_TARGETS_UP
5514	PPP1R10	protein phosphatase 1, regulatory subunit 10																						ONKEN_UVEAL_MELANOMA_UP											GARY_CD5_TARGETS_UP														LOPEZ_MBD_TARGETS
51586	MED15	mediator complex subunit 15																						ONKEN_UVEAL_MELANOMA_UP															MILI_PSEUDOPODIA_CHEMOTAXIS_DN
220929	ZNF438	zinc finger protein 438																							KRIGE_RESPONSE_TO_TOSEDOSTAT_6HR_UP																						ZWANG_TRANSIENTLY_UP_BY_1ST_EGF_PULSE_ONLY
64766	S100PBP	S100P binding protein																								KOINUMA_TARGETS_OF_SMAD2_OR_SMAD3	DODD_NASOPHARYNGEAL_CARCINOMA_DN													LASTOWSKA_NEUROBLASTOMA_COPY_NUMBER_DN
84930	MASTL	microtubule associated serine/threonine kinase-like																								KOINUMA_TARGETS_OF_SMAD2_OR_SMAD3	DODD_NASOPHARYNGEAL_CARCINOMA_DN														JOHNSTONE_PARVB_TARGETS_3_DN		GOBERT_OLIGODENDROCYTE_DIFFERENTIATION_DN
84967	LSM10	LSM10, U7 small nuclear RNA associated																								KOINUMA_TARGETS_OF_SMAD2_OR_SMAD3				ACEVEDO_LIVER_TUMOR_VS_NORMAL_ADJACENT_TISSUE_UP										LASTOWSKA_NEUROBLASTOMA_COPY_NUMBER_DN	JOHNSTONE_PARVB_TARGETS_3_DN			MARSON_BOUND_BY_FOXP3_STIMULATED
56980	PRDM10	PR domain containing 10																								KOINUMA_TARGETS_OF_SMAD2_OR_SMAD3														LASTOWSKA_NEUROBLASTOMA_COPY_NUMBER_DN
3566	IL4R	interleukin 4 receptor																								KOINUMA_TARGETS_OF_SMAD2_OR_SMAD3																GRAESSMANN_APOPTOSIS_BY_DOXORUBICIN_UP
23710	GABARAPL1	GABA(A) receptor-associated protein like 1																								KOINUMA_TARGETS_OF_SMAD2_OR_SMAD3																			OSMAN_BLADDER_CANCER_DN		ZWANG_TRANSIENTLY_UP_BY_1ST_EGF_PULSE_ONLY
150465	TTL	tubulin tyrosine ligase																								KOINUMA_TARGETS_OF_SMAD2_OR_SMAD3
8843	HCAR3	hydroxycarboxylic acid receptor 3																								KOINUMA_TARGETS_OF_SMAD2_OR_SMAD3
163081	ZNF567	zinc finger protein 567																									DODD_NASOPHARYNGEAL_CARCINOMA_DN														JOHNSTONE_PARVB_TARGETS_3_DN						ZWANG_TRANSIENTLY_UP_BY_1ST_EGF_PULSE_ONLY
10578	GNLY	granulysin																									DODD_NASOPHARYNGEAL_CARCINOMA_DN
440275	EIF2AK4	eukaryotic translation initiation factor 2 alpha kinase 4																									DODD_NASOPHARYNGEAL_CARCINOMA_DN
904	CCNT1	cyclin T1																									DODD_NASOPHARYNGEAL_CARCINOMA_DN
92935	MARS2	methionyl-tRNA synthetase 2, mitochondrial																									DODD_NASOPHARYNGEAL_CARCINOMA_DN
864	RUNX3	runt-related transcription factor 3																										OSMAN_BLADDER_CANCER_UP							GARY_CD5_TARGETS_UP					LASTOWSKA_NEUROBLASTOMA_COPY_NUMBER_DN
127933	UHMK1	U2AF homology motif (UHM) kinase 1																										OSMAN_BLADDER_CANCER_UP							GARY_CD5_TARGETS_UP						JOHNSTONE_PARVB_TARGETS_3_DN	GRAESSMANN_APOPTOSIS_BY_DOXORUBICIN_UP
79699	ZYG11B	zyg-11 homolog B (C. elegans)																										OSMAN_BLADDER_CANCER_UP												LASTOWSKA_NEUROBLASTOMA_COPY_NUMBER_DN						NUYTTEN_NIPP1_TARGETS_UP
55672	NBPF1	neuroblastoma breakpoint family, member 1																										OSMAN_BLADDER_CANCER_UP																					LOPEZ_MBD_TARGETS
389677	RBM12B	RNA binding motif protein 12B																										OSMAN_BLADDER_CANCER_UP
143098	MPP7	membrane protein, palmitoylated 7 (MAGUK p55 subfamily member 7)																											MILI_PSEUDOPODIA_HAPTOTAXIS_UP																	NUYTTEN_NIPP1_TARGETS_UP	ZWANG_TRANSIENTLY_UP_BY_1ST_EGF_PULSE_ONLY
79634	SCRN3	secernin 3																											MILI_PSEUDOPODIA_HAPTOTAXIS_UP
54878	DPP8	dipeptidyl-peptidase 8																											MILI_PSEUDOPODIA_HAPTOTAXIS_UP
256643	CXorf23	chromosome X open reading frame 23																											MILI_PSEUDOPODIA_HAPTOTAXIS_UP
10263	CDK2AP2	cyclin-dependent kinase 2 associated protein 2																												ACEVEDO_LIVER_TUMOR_VS_NORMAL_ADJACENT_TISSUE_UP												GRAESSMANN_APOPTOSIS_BY_DOXORUBICIN_UP							LOPEZ_MBD_TARGETS
291	SLC25A4	solute carrier family 25 (mitochondrial carrier; adenine nucleotide translocator), member 4																												ACEVEDO_LIVER_TUMOR_VS_NORMAL_ADJACENT_TISSUE_UP
64925	CCDC71	coiled-coil domain containing 71																												ACEVEDO_LIVER_TUMOR_VS_NORMAL_ADJACENT_TISSUE_UP
1880	GPR183	G protein-coupled receptor 183																														ZHENG_BOUND_BY_FOXP3
196441	ZFC3H1	zinc finger, C3H1-type containing																															SHEN_SMARCA2_TARGETS_UP					DAZARD_RESPONSE_TO_UV_NHEK_DN									ZWANG_TRANSIENTLY_UP_BY_1ST_EGF_PULSE_ONLY
79037	PVRIG	poliovirus receptor related immunoglobulin domain containing																																HADDAD_B_LYMPHOCYTE_PROGENITOR			LEE_DIFFERENTIATING_T_LYMPHOCYTE
54436	SH3TC1	SH3 domain and tetratricopeptide repeats 1																																HADDAD_B_LYMPHOCYTE_PROGENITOR
9623	TCL1B	T-cell leukemia/lymphoma 1B																																HADDAD_B_LYMPHOCYTE_PROGENITOR
406991	MIR21	microRNA 21																																	GARY_CD5_TARGETS_UP
1117	CHI3L2	chitinase 3-like 2																																	GARY_CD5_TARGETS_UP
22849	CPEB3	cytoplasmic polyadenylation element binding protein 3																																				DAZARD_RESPONSE_TO_UV_NHEK_DN		LASTOWSKA_NEUROBLASTOMA_COPY_NUMBER_DN							ZWANG_TRANSIENTLY_UP_BY_1ST_EGF_PULSE_ONLY
23162	MAPK8IP3	mitogen-activated protein kinase 8 interacting protein 3																																					MILI_PSEUDOPODIA_CHEMOTAXIS_DN				GOBERT_OLIGODENDROCYTE_DIFFERENTIATION_DN
29781	NCAPH2	non-SMC condensin II complex, subunit H2																																					MILI_PSEUDOPODIA_CHEMOTAXIS_DN								ZWANG_TRANSIENTLY_UP_BY_1ST_EGF_PULSE_ONLY
54923	LIME1	Lck interacting transmembrane adaptor 1																																					MILI_PSEUDOPODIA_CHEMOTAXIS_DN
84811	BUD13	BUD13 homolog (S. cerevisiae)																																						LASTOWSKA_NEUROBLASTOMA_COPY_NUMBER_DN					OSMAN_BLADDER_CANCER_DN
93621	MRFAP1	Morf4 family associated protein 1																																						LASTOWSKA_NEUROBLASTOMA_COPY_NUMBER_DN									LOPEZ_MBD_TARGETS
112950	MED8	mediator complex subunit 8																																						LASTOWSKA_NEUROBLASTOMA_COPY_NUMBER_DN
4798	NFRKB	nuclear factor related to kappaB binding protein																																						LASTOWSKA_NEUROBLASTOMA_COPY_NUMBER_DN
8509	NDST2	N-deacetylase/N-sulfotransferase (heparan glucosaminyl) 2																																						LASTOWSKA_NEUROBLASTOMA_COPY_NUMBER_DN
126328	NDUFA11	NADH dehydrogenase (ubiquinone) 1 alpha subcomplex, 11, 14.7kDa																																							JOHNSTONE_PARVB_TARGETS_3_DN	GRAESSMANN_APOPTOSIS_BY_DOXORUBICIN_UP
201475	RAB12	RAB12, member RAS oncogene family																																							JOHNSTONE_PARVB_TARGETS_3_DN
55814	BDP1	B double prime 1, subunit of RNA polymerase III transcription initiation factor IIIB																																							JOHNSTONE_PARVB_TARGETS_3_DN
284439	SLC25A42	solute carrier family 25, member 42																																								GRAESSMANN_APOPTOSIS_BY_DOXORUBICIN_UP	GOBERT_OLIGODENDROCYTE_DIFFERENTIATION_DN
374618	TEX9	testis expressed 9																																								GRAESSMANN_APOPTOSIS_BY_DOXORUBICIN_UP
155066	ATP6V0E2	ATPase, H+ transporting V0 subunit e2																																								GRAESSMANN_APOPTOSIS_BY_DOXORUBICIN_UP
162979	ZNF296	zinc finger protein 296																																								GRAESSMANN_APOPTOSIS_BY_DOXORUBICIN_UP
80152	CENPT	centromere protein T																																								GRAESSMANN_APOPTOSIS_BY_DOXORUBICIN_UP
9746	CLSTN3	calsyntenin 3																																								GRAESSMANN_APOPTOSIS_BY_DOXORUBICIN_UP
135114	HINT3	histidine triad nucleotide binding protein 3																																									GOBERT_OLIGODENDROCYTE_DIFFERENTIATION_DN				ZWANG_TRANSIENTLY_UP_BY_1ST_EGF_PULSE_ONLY
2187	FANCB	Fanconi anemia, complementation group B																																									GOBERT_OLIGODENDROCYTE_DIFFERENTIATION_DN
23523	CABIN1	calcineurin binding protein 1																																									GOBERT_OLIGODENDROCYTE_DIFFERENTIATION_DN
84669	USP32	ubiquitin specific peptidase 32																																									GOBERT_OLIGODENDROCYTE_DIFFERENTIATION_DN
84446	BRSK1	BR serine/threonine kinase 1																																									GOBERT_OLIGODENDROCYTE_DIFFERENTIATION_DN
54812	AFTPH	aftiphilin																																										MARSON_BOUND_BY_FOXP3_STIMULATED
51247	PAIP2	poly(A) binding protein interacting protein 2																																										MARSON_BOUND_BY_FOXP3_STIMULATED
116369	SLC26A8	solute carrier family 26, member 8																																										MARSON_BOUND_BY_FOXP3_STIMULATED
253018	HCG27	HLA complex group 27 (non-protein coding)																																											OSMAN_BLADDER_CANCER_DN		ZWANG_TRANSIENTLY_UP_BY_1ST_EGF_PULSE_ONLY
3003	GZMK	granzyme K (granzyme 3; tryptase II)																																											OSMAN_BLADDER_CANCER_DN
2010	EMD	emerin																																											OSMAN_BLADDER_CANCER_DN
8631	SKAP1	src kinase associated phosphoprotein 1																																											OSMAN_BLADDER_CANCER_DN
9648	GCC2	GRIP and coiled-coil domain containing 2																																												NUYTTEN_NIPP1_TARGETS_UP
116143	WDR92	WD repeat domain 92																																												NUYTTEN_NIPP1_TARGETS_UP
6604	SMARCD3	SWI/SNF related, matrix associated, actin dependent regulator of chromatin, subfamily d, member 3																																													ZWANG_TRANSIENTLY_UP_BY_1ST_EGF_PULSE_ONLY		LOPEZ_MBD_TARGETS
7737	RNF113A	ring finger protein 113A																																													ZWANG_TRANSIENTLY_UP_BY_1ST_EGF_PULSE_ONLY		LOPEZ_MBD_TARGETS
10855	HPSE	heparanase																																													ZWANG_TRANSIENTLY_UP_BY_1ST_EGF_PULSE_ONLY
80017	C14orf159	chromosome 14 open reading frame 159																																													ZWANG_TRANSIENTLY_UP_BY_1ST_EGF_PULSE_ONLY
29767	TMOD2	tropomodulin 2 (neuronal)																																													ZWANG_TRANSIENTLY_UP_BY_1ST_EGF_PULSE_ONLY
90576	ZNF799	zinc finger protein 799																																													ZWANG_TRANSIENTLY_UP_BY_1ST_EGF_PULSE_ONLY
129530	LYG1	lysozyme G-like 1																																													ZWANG_TRANSIENTLY_UP_BY_1ST_EGF_PULSE_ONLY
3823	KLRC3	killer cell lectin-like receptor subfamily C, member 3																																													ZWANG_TRANSIENTLY_UP_BY_1ST_EGF_PULSE_ONLY
80216	ALPK1	alpha-kinase 1																																													ZWANG_TRANSIENTLY_UP_BY_1ST_EGF_PULSE_ONLY
63908	NAPB	N-ethylmaleimide-sensitive factor attachment protein, beta																																													ZWANG_TRANSIENTLY_UP_BY_1ST_EGF_PULSE_ONLY
619505	SNORA21	small nucleolar RNA, H/ACA box 21																																													ZWANG_TRANSIENTLY_UP_BY_1ST_EGF_PULSE_ONLY
286140	RNF5P1	ring finger protein 5 pseudogene 1																																													ZWANG_TRANSIENTLY_UP_BY_1ST_EGF_PULSE_ONLY
29015	SLC43A3	solute carrier family 43, member 3																																															LOPEZ_MBD_TARGETS
55902	ACSS2	acyl-CoA synthetase short-chain family member 2																																															LOPEZ_MBD_TARGETS
150365	MEI1	meiosis inhibitor 1																																															LOPEZ_MBD_TARGETS
326624	RAB37	RAB37, member RAS oncogene family																																															LOPEZ_MBD_TARGETS
2710	GK	glycerol kinase
6539	SLC6A12	solute carrier family 6 (neurotransmitter transporter, betaine/GABA), member 12
123036	TC2N	tandem C2 domains, nuclear
80071	CCDC15	coiled-coil domain containing 15
65057	ACD	adrenocortical dysplasia homolog (mouse)
64771	C6orf106	chromosome 6 open reading frame 106
3310	HSPA6	heat shock 70kDa protein 6 (HSP70B')
9704	DHX34	DEAH (Asp-Glu-Ala-His) box polypeptide 34
14	AAMP	angio-associated, migratory cell protein
83874	TBC1D10A	TBC1 domain family, member 10A
84246	MED10	mediator complex subunit 10
10911	UTS2	urotensin 2
2357	FPR1	formyl peptide receptor 1
313	AOAH	acyloxyacyl hydrolase (neutrophil)
79772	MCTP1	multiple C2 domains, transmembrane 1
79651	RHBDF2	rhomboid 5 homolog 2 (Drosophila)
79002	C19orf43	chromosome 19 open reading frame 43
126299	ZNF428	zinc finger protein 428
8214	DGCR6	DiGeorge syndrome critical region gene 6
3004	GZMM	granzyme M (lymphocyte met-ase 1)
3820	KLRB1	killer cell lectin-like receptor subfamily B, member 1
9465	AKAP7	A kinase (PRKA) anchor protein 7
6871	TADA2A	transcriptional adaptor 2A
123720	WHAMM	WAS protein homolog associated with actin, golgi membranes and microtubules
117157	SH2D1B	SH2 domain containing 1B
51409	HEMK1	HemK methyltransferase family member 1
57724	EPG5	ectopic P-granules autophagy protein 5 homolog (C. elegans)
84628	NTNG2	netrin G2
162073	ITPRIPL2	inositol 1,4,5-trisphosphate receptor interacting protein-like 2
89790	SIGLEC10	sialic acid binding Ig-like lectin 10
387680	FAM21A	family with sequence similarity 21, member A
57038	RARS2	arginyl-tRNA synthetase 2, mitochondrial
150726	FBXO41	F-box protein 41
57571	CARNS1	carnosine synthase 1
57692	MAGEE1	melanoma antigen family E, 1
149628	PYHIN1	pyrin and HIN domain family, member 1
8666	EIF3G	eukaryotic translation initiation factor 3, subunit G
1084	CEACAM3	carcinoembryonic antigen-related cell adhesion molecule 3
433	ASGR2	asialoglycoprotein receptor 2
84321	THOC3	THO complex 3
9806	SPOCK2	sparc/osteonectin, cwcv and kazal-like domains proteoglycan (testican) 2
163126	EID2	EP300 interacting inhibitor of differentiation 2
79957	PAQR6	progestin and adipoQ receptor family member VI
266812	NAP1L5	nucleosome assembly protein 1-like 5
4824	NKX3-1	NK3 homeobox 1
54887	UHRF1BP1	UHRF1 binding protein 1
55653	BCAS4	breast carcinoma amplified sequence 4
85329	LGALS12	lectin, galactoside-binding, soluble, 12
85012	TCEAL3	transcription elongation factor A (SII)-like 3
64978	MRPL38	mitochondrial ribosomal protein L38
196463	PLBD2	phospholipase B domain containing 2
53917	RAB24	RAB24, member RAS oncogene family
80758	PRR7	proline rich 7 (synaptic)
27185	DISC1	disrupted in schizophrenia 1
125050	RN7SK	RNA, 7SK small nuclear
128854	TSPY26P	testis specific protein, Y-linked 26, pseudogene
319103	SNORD8	small nucleolar RNA, C/D box 8
1742	DLG4	discs, large homolog 4 (Drosophila)
139065	SLITRK4	SLIT and NTRK-like family, member 4
146880	LOC146880	Rho GTPase activating protein 27 pseudogene
51006	SLC35C2	solute carrier family 35, member C2
29065	ASAP1-IT1	ASAP1 intronic transcript 1 (non-protein coding)
253143	PRR14L	proline rich 14-like
143689	PIWIL4	piwi-like 4 (Drosophila)
317671	RFESD	Rieske (Fe-S) domain containing
80764	THAP7	THAP domain containing 7
388962	BOLA3	bolA homolog 3 (E. coli)
132789	GNPDA2	glucosamine-6-phosphate deaminase 2
9047	SH2D2A	SH2 domain containing 2A
85319	BAGE2	B melanoma antigen family, member 2
126917	IFFO2	intermediate filament family orphan 2
9149	DYRK1B	dual-specificity tyrosine-(Y)-phosphorylation regulated kinase 1B
26240	FAM50B	family with sequence similarity 50, member B
9560	CCL4L1	chemokine (C-C motif) ligand 4-like 1
59285	CACNG6	calcium channel, voltage-dependent, gamma subunit 6
23163	GGA3	golgi-associated, gamma adaptin ear containing, ARF binding protein 3
201633	TIGIT	T cell immunoreceptor with Ig and ITIM domains
55096	EBLN2	endogenous Bornavirus-like nucleoprotein 2
64805	P2RY12	purinergic receptor P2Y, G-protein coupled, 12
4607	MYBPC3	myosin binding protein C, cardiac
29935	RPA4	replication protein A4, 30kDa
28964	GIT1	G protein-coupled receptor kinase interacting ArfGAP 1
56344	CABP5	calcium binding protein 5
153684	LOC153684	uncharacterized LOC153684
100190986	LOC100190986	uncharacterized LOC100190986
126017	ZNF813	zinc finger protein 813
90134	KCNH7	potassium voltage-gated channel, subfamily H (eag-related), member 7
126375	ZNF792	zinc finger protein 792
29057	FAM156A	family with sequence similarity 156, member A
347344	ZNF81	zinc finger protein 81
126014	OSCAR	osteoclast associated, immunoglobulin-like receptor
399967	PATE2	prostate and testis expressed 2
81025	GJA9	gap junction protein, alpha 9, 59kDa
100506815	FOXP1-IT1	FOXP1 intronic transcript 1 (non-protein coding)
401357	LOC401357	uncharacterized LOC401357
138474	TAF1L	TAF1 RNA polymerase II, TATA box binding protein (TBP)-associated factor, 210kDa-like
414318	C9orf106	chromosome 9 open reading frame 106
139105	BEND2	BEN domain containing 2
3311	HSPA7	heat shock 70kDa protein 7 (HSP70B)
503645	DPRXP4	divergent-paired related homeobox pseudogene 4
56981	PRDM11	PR domain containing 11
606724	LOC606724	coronin, actin binding protein, 1A pseudogene
618	BCYRN1	brain cytoplasmic RNA 1 (non-protein coding)
641367	LOC641367	cyclin Y-like 1 pseudogene
677800	SNORA12	small nucleolar RNA, H/ACA box 12
728554	LOC728554	THO complex 3 pseudogene
729451	LOC729451	uncharacterized LOC729451
84054	PCDHB19P	protocadherin beta 19 pseudogene
85316	BAGE5	B melanoma antigen family, member 5
85318	BAGE3	B melanoma antigen family, member 3
[truncated: 53 more columns]

## Sheet: LN TB
GSEA (transcription factor enrichment) in differentially expressed in disseminated (lymph node) TB vs. pulmonary TB
Overlap Results
Collection(s):	C3	Type I IFN gene sets
# overlaps shown:	100	IL6/STAT3 gene sets
# genesets in collections:	836	CD34+/HSPC/monocyte/macrophage gene sets
# genes in comparison (n):	738
# genes in universe (N):	45956
Gene Set Name	# Genes in Gene Set (K)	Description	# Genes in Overlap (k)	k/K	p-value	FDR q-value
CEBPB_02	258	Genes having at least one occurence of the transcription factor binding site V$CEBPB_02 (v7.4 TRANSFAC) in the regions spanning up to 4 kb around their transcription starting sites.	20	0.0775	9.43e-09	1.06e-07
CEBPB_01	262	Genes having at least one occurence of the transcription factor binding site V$CEBPB_01 (v7.4 TRANSFAC) in the regions spanning up to 4 kb around their transcription starting sites.	20	0.0763	1.22e-08	1.29e-07
ISRE_01	247	Genes having at least one occurence of the transcription factor binding site V$ISRE_01 (v7.4 TRANSFAC) in the regions spanning up to 4 kb around their transcription starting sites.	20	0.081	4.49e-09	5.77e-08
IRF1_01	250	Genes having at least one occurence of the transcription factor binding site V$IRF1_01 (v7.4 TRANSFAC) in the regions spanning up to 4 kb around their transcription starting sites.	20	0.08	5.52e-09	6.59e-08
IRF1_Q6	258	Genes having at least one occurence of the transcription factor binding site V$IRF1_Q6 (v7.4 TRANSFAC) in the regions spanning up to 4 kb around their transcription starting sites.	19	0.0736	4.99e-08	4.4e-07
ICSBP_Q6	248	Genes having at least one occurence of the transcription factor binding site V$ICSBP_Q6 (v7.4 TRANSFAC) in the regions spanning up to 4 kb around their transcription starting sites.	20	0.0806	4.81e-09	6.09e-08
GATA3_01	242	Genes having at least one occurence of the transcription factor binding site V$GATA3_01 (v7.4 TRANSFAC) in the regions spanning up to 4 kb around their transcription starting sites.	23	0.095	1.26e-11	3.3e-10
TGACAGNY_MEIS1_01	827	Genes having at least one occurence of the highly conserved motif M41 TGACAGNY sites. The motif matches transcription factor binding site V$MEIS1_01 (v7.4 TRANSFAC).	43	0.052	2.53e-11	6.04e-10
NRF2_Q4	255	Genes having at least one occurence of the transcription factor binding site V$NRF2_Q4 (v7.4 TRANSFAC) in the regions spanning up to 4 kb around their transcription starting sites.	19	0.0745	4.15e-08	3.73e-07
GGGCGGR_SP1_Q6	2940	Genes having at least one occurence of the highly conserved motif M6 GGGCGGR sites. The motif matches transcription factor binding site V$SP1_Q6 (v7.4 TRANSFAC).	161	0.0548	9e-44	7.52e-41
TTGTTT_FOXO4_01	2061	Genes having at least one occurence of the highly conserved motif M60 TTGTTT sites. The motif matches transcription factor binding site V$FOXO4_01 (v7.4 TRANSFAC).	118	0.0573	2.1e-33	8.77e-31
TGGAAA_NFAT_Q4_01	1896	Genes having at least one occurence of the highly conserved motif M55 TGGAAA sites. The motif matches transcription factor binding site V$NFAT_Q4_01 (v7.4 TRANSFAC).	110	0.058	1.35e-31	3.76e-29
AACTTT_UNKNOWN	1890	Genes having at least one occurence of the highly conserved motif M17 AACTTT in the region spanning up to 4 kb around their transcription start sites. The motif does not match any known transcription factor binding site (v7.4 TRANSFAC).	109	0.0577	4.39e-31	9.18e-29
CAGCTG_AP4_Q5	1524	Genes having at least one occurence of the highly conserved motif M15 CAGCTG sites. The motif matches transcription factor binding site V$AP4_Q5 (v7.4 TRANSFAC).	96	0.063	2.81e-30	4.7e-28
GGGAGGRR_MAZ_Q6	2274	Genes having at least one occurence of the highly conserved motif M24 GGGAGGRR sites. The motif matches transcription factor binding site V$MAZ_Q6 (v7.4 TRANSFAC).	119	0.0523	4.11e-30	5.73e-28
CAGGTG_E12_Q6	2485	Genes having at least one occurence of the highly conserved motif M12 CAGGTG sites. The motif matches transcription factor binding site V$E12_Q6 (v7.4 TRANSFAC).	121	0.0487	8.39e-28	1e-25
CTTTGT_LEF1_Q2	1972	Genes having at least one occurence of the highly conserved motif M13 CTTTGT sites. The motif matches transcription factor binding site V$LEF1_Q2 (v7.4 TRANSFAC).	102	0.0517	2.22e-25	2.31e-23
TATAAA_TATA_01	1296	Genes having at least one occurence of the highly conserved motif M51 TATAAA sites. The motif matches transcription factor binding site V$TATA_01 (v7.4 TRANSFAC).	75	0.0579	1.45e-21	1.35e-19
TGANTCA_AP1_C	1121	Genes having at least one occurence of the highly conserved motif M7 TGANTCA sites. The motif matches transcription factor binding site V$AP1_C (v7.4 TRANSFAC).	66	0.0589	1.85e-19	1.54e-17
SRF_Q4	221	Genes having at least one occurence of the transcription factor binding site V$SRF_Q4 (v7.4 TRANSFAC) in the regions spanning up to 4 kb around their transcription starting sites.	29	0.1312	4.78e-18	3.64e-16
RYTTCCTG_ETS2_B	1085	Genes having at least one occurence of the highly conserved motif M16 RYTTCCTG sites. The motif matches transcription factor binding site V$ETS2_B (v7.4 TRANSFAC).	62	0.0571	1.02e-17	7.12e-16
SRF_Q6	241	Genes having at least one occurence of the transcription factor binding site V$SRF_Q6 (v7.4 TRANSFAC) in the regions spanning up to 4 kb around their transcription starting sites.	29	0.1203	5.16e-17	3.32e-15
HNF4ALPHA_Q6	271	Genes having at least one occurence of the transcription factor binding site V$HNF4ALPHA_Q6 (v7.4 TRANSFAC) in the regions spanning up to 4 kb around their transcription starting sites.	30	0.1107	1.53e-16	9.11e-15
TGCCAAR_NF1_Q6	722	Genes having at least one occurence of the highly conserved motif M47 TGCCAAR sites. The motif matches transcription factor binding site V$NF1_Q6 (v7.4 TRANSFAC).	48	0.0665	1.84e-16	1.03e-14
SRF_Q5_01	220	Genes having at least one occurence of the transcription factor binding site V$SRF_Q5_01 (v7.4 TRANSFAC) in the regions spanning up to 4 kb around their transcription starting sites.	27	0.1227	3.75e-16	1.96e-14
TGTTTGY_HNF3_Q6	738	Genes having at least one occurence of the highly conserved motif M83 TGTTTGY sites. The motif matches transcription factor binding site V$HNF3_Q6 (v7.4 TRANSFAC).	48	0.065	4.31e-16	2.12e-14
GGGTGGRR_PAX4_03	1294	Genes having at least one occurence of the highly conserved motif M56 GGGTGGRR sites. The motif matches transcription factor binding site V$PAX4_03 (v7.4 TRANSFAC).	65	0.0502	8.51e-16	3.95e-14
GCANCTGNY_MYOD_Q6	924	Genes having at least one occurence of the highly conserved motif M35 GCANCTGNY sites. The motif matches transcription factor binding site V$MYOD_Q6 (v7.4 TRANSFAC).	53	0.0574	2.27e-15	9.98e-14
WGTTNNNNNAAA_UNKNOWN	547	Genes having at least one occurence of the highly conserved motif M155 WGTTNNNNNAAA in the region spanning up to 4 kb around their transcription start sites. The motif does not match any known transcription factor binding site (v7.4 TRANSFAC).	38	0.0695	6.92e-14	2.89e-12
SRF_C	211	Genes having at least one occurence of the transcription factor binding site V$SRF_C (v7.4 TRANSFAC) in the regions spanning up to 4 kb around their transcription starting sites.	24	0.1137	9.01e-14	3.59e-12
RTAAACA_FREAC2_01	919	Genes having at least one occurence of the highly conserved motif M36 RTAAACA sites. The motif matches transcription factor binding site V$FREAC2_01 (v7.4 TRANSFAC).	50	0.0544	1.07e-13	4.08e-12
GGGYGTGNY_UNKNOWN	664	Genes having at least one occurence of the highly conserved motif M31 GGGYGTGNY in the region spanning up to 4 kb around their transcription start sites. The motif does not match any known transcription factor binding site (v7.4 TRANSFAC).	41	0.0617	3.42e-13	1.24e-11
TGACATY_UNKNOWN	665	Genes having at least one occurence of the highly conserved motif M42 TGACATY in the region spanning up to 4 kb around their transcription start sites. The motif does not match any known transcription factor binding site (v7.4 TRANSFAC).	41	0.0617	3.59e-13	1.25e-11
TTCYRGAA_UNKNOWN	326	Genes having at least one occurence of the highly conserved motif M72 TTCYRGAA in the region spanning up to 4 kb around their transcription start sites. The motif does not match any known transcription factor binding site (v7.4 TRANSFAC).	28	0.0859	9.11e-13	3.05e-11
WGGAATGY_TEF1_Q6	378	Genes having at least one occurence of the highly conserved motif M79 WGGAATGY sites. The motif matches transcription factor binding site V$TEF1_Q6 (v7.4 TRANSFAC).	30	0.0794	1.07e-12	3.45e-11
SCGGAAGY_ELK1_02	1199	Genes having at least one occurence of the highly conserved motif M3 SCGGAAGY sites. The motif matches transcription factor binding site V$ELK1_02 (v7.4 TRANSFAC).	56	0.0467	1.71e-12	5.31e-11
TFIIA_Q6	251	Genes having at least one occurence of the transcription factor binding site V$TFIIA_Q6 (v7.4 TRANSFAC) in the regions spanning up to 4 kb around their transcription starting sites.	24	0.0956	3.99e-12	1.19e-10
RNGTGGGC_UNKNOWN	766	Genes having at least one occurence of the highly conserved motif M140 RNGTGGGC in the region spanning up to 4 kb around their transcription start sites. The motif does not match any known transcription factor binding site (v7.4 TRANSFAC).	42	0.0548	8.21e-12	2.37e-10
IRF_Q6	242	Genes having at least one occurence of the transcription factor binding site V$IRF_Q6 (v7.4 TRANSFAC) in the regions spanning up to 4 kb around their transcription starting sites.	23	0.095	1.26e-11	3.3e-10
AP1_Q2	265	Genes having at least one occurence of the transcription factor binding site V$AP1_Q2 (v7.4 TRANSFAC) in the regions spanning up to 4 kb around their transcription starting sites.	24	0.0906	1.26e-11	3.3e-10
TAATTA_CHX10_01	810	Genes having at least one occurence of the highly conserved motif M23 TAATTA sites. The motif matches transcription factor binding site V$CHX10_01 (v7.4 TRANSFAC).	43	0.0531	1.31e-11	3.31e-10
CTTTGA_LEF1_Q2	1232	Genes having at least one occurence of the highly conserved motif M73 CTTTGA sites. The motif matches transcription factor binding site V$LEF1_Q2 (v7.4 TRANSFAC).	55	0.0446	1.54e-11	3.77e-10
TGACCTY_ERR1_Q2	1043	Genes having at least one occurence of the highly conserved motif M25 TGACCTY sites. The motif matches transcription factor binding site V$ERR1_Q2 (v7.4 TRANSFAC).	49	0.047	3.6e-11	8.28e-10
ZIC3_01	255	Genes having at least one occurence of the transcription factor binding site V$ZIC3_01 (v7.4 TRANSFAC) in the regions spanning up to 4 kb around their transcription starting sites.	23	0.0902	3.67e-11	8.28e-10
HNF3_Q6	189	Genes having at least one occurence of the transcription factor binding site V$HNF3_Q6 (v7.4 TRANSFAC) in the regions spanning up to 4 kb around their transcription starting sites.	20	0.1058	3.93e-11	8.65e-10
TTCYNRGAA_STAT5B_01	335	Genes having at least one occurence of the highly conserved motif M40 TTCYNRGAA sites. The motif matches transcription factor binding site V$STAT5B_01 (v7.4 TRANSFAC).	26	0.0776	5.67e-11	1.22e-09
AP1_Q4_01	261	Genes having at least one occurence of the transcription factor binding site V$AP1_Q4_01 (v7.4 TRANSFAC) in the regions spanning up to 4 kb around their transcription starting sites.	23	0.0881	5.86e-11	1.23e-09
PAX4_01	262	Genes having at least one occurence of the transcription factor binding site V$PAX4_01 (v7.4 TRANSFAC) in the regions spanning up to 4 kb around their transcription starting sites.	23	0.0878	6.33e-11	1.29e-09
CACGTG_MYC_Q2	1032	Genes having at least one occurence of the highly conserved motif M2 CACGTG sites. The motif matches transcription factor binding site V$MYC_Q2 (v7.4 TRANSFAC).	48	0.0465	8.05e-11	1.6e-09
TGGNNNNNNKCCAR_UNKNOWN	424	Genes having at least one occurence of the highly conserved motif M27 TGGNNNNNNKCCAR in the region spanning up to 4 kb around their transcription start sites. The motif does not match any known transcription factor binding site (v7.4 TRANSFAC).	29	0.0684	9.31e-11	1.81e-09
AP1FJ_Q2	268	Genes having at least one occurence of the transcription factor binding site V$AP1FJ_Q2 (v7.4 TRANSFAC) in the regions spanning up to 4 kb around their transcription starting sites.	23	0.0858	9.96e-11	1.89e-09
STAT5A_01	251	Genes having at least one occurence of the transcription factor binding site V$STAT5A_01 (v7.4 TRANSFAC) in the regions spanning up to 4 kb around their transcription starting sites.	22	0.0876	1.69e-10	3.15e-09
ATF4_Q2	258	Genes having at least one occurence of the transcription factor binding site V$ATF4_Q2 (v7.4 TRANSFAC) in the regions spanning up to 4 kb around their transcription starting sites.	22	0.0853	2.87e-10	5.21e-09
FOX_Q2	213	Genes having at least one occurence of the transcription factor binding site V$FOX_Q2 (v7.4 TRANSFAC) in the regions spanning up to 4 kb around their transcription starting sites.	20	0.0939	3.39e-10	6.03e-09
YTATTTTNR_MEF2_02	697	Genes having at least one occurence of the highly conserved motif M33 YTATTTTNR sites. The motif matches transcription factor binding site V$MEF2_02 (v7.4 TRANSFAC).	37	0.0531	3.57e-10	6.22e-09
RGAANNTTC_HSF1_01	446	Genes having at least one occurence of the highly conserved motif M68 RGAANNTTC sites. The motif matches transcription factor binding site V$HSF1_01 (v7.4 TRANSFAC).	28	0.0628	1.35e-09	2.3e-08
HNF3ALPHA_Q6	208	Genes having at least one occurence of the transcription factor binding site V$HNF3ALPHA_Q6 (v7.4 TRANSFAC) in the regions spanning up to 4 kb around their transcription starting sites.	19	0.0913	1.48e-09	2.48e-08
PAX2_02	258	Genes having at least one occurence of the transcription factor binding site V$PAX2_02 (v7.4 TRANSFAC) in the regions spanning up to 4 kb around their transcription starting sites.	21	0.0814	1.69e-09	2.77e-08
RCGCANGCGY_NRF1_Q6	918	Genes having at least one occurence of the highly conserved motif M1 RCGCANGCGY sites. The motif matches transcription factor binding site V$NRF1_Q6 (v7.4 TRANSFAC).	42	0.0458	2.03e-09	3.26e-08
OSF2_Q6	264	Genes having at least one occurence of the transcription factor binding site V$OSF2_Q6 (v7.4 TRANSFAC) in the regions spanning up to 4 kb around their transcription starting sites.	21	0.0795	2.55e-09	4.02e-08
TGGTGCT_MIR29A_MIR29B_MIR29C	521	Genes having at least one occurence of the motif TGGTGCT in their 3' untranslated region. The motif represents putative target (that is, seed match) of human mature miRNAs hsa-miR-29a, hsa-miR-29b and hsa-miR-29c (v7.1 miRBase).	30	0.0576	2.64e-09	4.08e-08
AAAYRNCTG_UNKNOWN	374	Genes having at least one occurence of the highly conserved motif M77 AAAYRNCTG in the region spanning up to 4 kb around their transcription start sites. The motif does not match any known transcription factor binding site (v7.4 TRANSFAC).	25	0.0668	2.91e-09	4.43e-08
CEBP_Q2_01	267	Genes having at least one occurence of the transcription factor binding site V$CEBP_Q2_01 (v7.4 TRANSFAC) in the regions spanning up to 4 kb around their transcription starting sites.	21	0.0787	3.12e-09	4.57e-08
IK2_01	267	Genes having at least one occurence of the transcription factor binding site V$IK2_01 (v7.4 TRANSFAC) in the regions spanning up to 4 kb around their transcription starting sites.	21	0.0787	3.12e-09	4.57e-08
CACCCBINDINGFACTOR_Q6	268	Genes having at least one occurence of the transcription factor binding site V$CACCCBINDINGFACTOR_Q6 (v7.4 TRANSFAC) in the regions spanning up to 4 kb around their transcription starting sites.	21	0.0784	3.33e-09	4.77e-08
CAGGTA_AREB6_01	792	Genes having at least one occurence of the highly conserved motif M76 CAGGTA sites. The motif matches transcription factor binding site V$AREB6_01 (v7.4 TRANSFAC).	38	0.048	3.37e-09	4.77e-08
CTTTAAR_UNKNOWN	972	Genes having at least one occurence of the highly conserved motif M29 CTTTAAR in the region spanning up to 4 kb around their transcription start sites. The motif does not match any known transcription factor binding site (v7.4 TRANSFAC).	43	0.0442	3.52e-09	4.88e-08
HNF4_01	269	Genes having at least one occurence of the transcription factor binding site V$HNF4_01 (v7.4 TRANSFAC) in the regions spanning up to 4 kb around their transcription starting sites.	21	0.0781	3.56e-09	4.88e-08
AP1_Q4	271	Genes having at least one occurence of the transcription factor binding site V$AP1_Q4 (v7.4 TRANSFAC) in the regions spanning up to 4 kb around their transcription starting sites.	21	0.0775	4.06e-09	5.39e-08
BACH2_01	271	Genes having at least one occurence of the transcription factor binding site V$BACH2_01 (v7.4 TRANSFAC) in the regions spanning up to 4 kb around their transcription starting sites.	21	0.0775	4.06e-09	5.39e-08
STAT5B_01	247	Genes having at least one occurence of the transcription factor binding site V$STAT5B_01 (v7.4 TRANSFAC) in the regions spanning up to 4 kb around their transcription starting sites.	20	0.081	4.49e-09	5.77e-08
ETS2_B	274	Genes having at least one occurence of the transcription factor binding site V$ETS2_B (v7.4 TRANSFAC) in the regions spanning up to 4 kb around their transcription starting sites.	21	0.0766	4.94e-09	6.16e-08
AP1_C	275	Genes having at least one occurence of the transcription factor binding site V$AP1_C (v7.4 TRANSFAC) in the regions spanning up to 4 kb around their transcription starting sites.	21	0.0764	5.27e-09	6.48e-08
TGAYRTCA_ATF3_Q6	538	Genes having at least one occurence of the highly conserved motif M9 TGAYRTCA sites. The motif matches transcription factor binding site V$ATF3_Q6 (v7.4 TRANSFAC).	30	0.0558	5.5e-09	6.59e-08
AREB6_04	252	Genes having at least one occurence of the transcription factor binding site V$AREB6_04 (v7.4 TRANSFAC) in the regions spanning up to 4 kb around their transcription starting sites.	20	0.0794	6.32e-09	7.44e-08
USF_C	279	Genes having at least one occurence of the transcription factor binding site V$USF_C (v7.4 TRANSFAC) in the regions spanning up to 4 kb around their transcription starting sites.	21	0.0753	6.8e-09	7.9e-08
ATF1_Q6	231	Genes having at least one occurence of the transcription factor binding site V$ATF1_Q6 (v7.4 TRANSFAC) in the regions spanning up to 4 kb around their transcription starting sites.	19	0.0823	8.43e-09	9.65e-08
GATTGGY_NFY_Q6_01	1160	Genes having at least one occurence of the highly conserved motif M5 GATTGGY sites. The motif matches transcription factor binding site V$NFY_Q6_01 (v7.4 TRANSFAC).	47	0.0405	1.02e-08	1.13e-07
ALPHACP1_01	260	Genes having at least one occurence of the transcription factor binding site V$ALPHACP1_01 (v7.4 TRANSFAC) in the regions spanning up to 4 kb around their transcription starting sites.	20	0.0769	1.07e-08	1.17e-07
CP2_01	260	Genes having at least one occurence of the transcription factor binding site V$CP2_01 (v7.4 TRANSFAC) in the regions spanning up to 4 kb around their transcription starting sites.	20	0.0769	1.07e-08	1.17e-07
HNF4_DR1_Q3	261	Genes having at least one occurence of the transcription factor binding site V$HNF4_DR1_Q3 (v7.4 TRANSFAC) in the regions spanning up to 4 kb around their transcription starting sites.	20	0.0766	1.15e-08	1.23e-07
STTTCRNTTT_IRF_Q6	188	Genes having at least one occurence of the highly conserved motif M85 STTTCRNTTT sites. The motif matches transcription factor binding site V$IRF_Q6 (v7.4 TRANSFAC).	17	0.0904	1.25e-08	1.31e-07
SOX9_B1	237	Genes having at least one occurence of the transcription factor binding site V$SOX9_B1 (v7.4 TRANSFAC) in the regions spanning up to 4 kb around their transcription starting sites.	19	0.0802	1.28e-08	1.32e-07
GTGCCTT_MIR506	727	Genes having at least one occurence of the motif GTGCCTT in their 3' untranslated region. The motif represents putative target (that is, seed match) of human mature miRNA hsa-miR-506 (v7.1 miRBase).	35	0.0481	1.29e-08	1.32e-07
EVI1_04	238	Genes having at least one occurence of the transcription factor binding site V$EVI1_04 (v7.4 TRANSFAC) in the regions spanning up to 4 kb around their transcription starting sites.	19	0.0798	1.37e-08	1.38e-07
TGATTTRY_GFI1_01	294	Genes having at least one occurence of the highly conserved motif M94 TGATTTRY sites. The motif matches transcription factor binding site V$GFI1_01 (v7.4 TRANSFAC).	21	0.0714	1.7e-08	1.69e-07
TTANTCA_UNKNOWN	952	Genes having at least one occurence of the highly conserved motif M64 TTANTCA in the region spanning up to 4 kb around their transcription start sites. The motif does not match any known transcription factor binding site (v7.4 TRANSFAC).	41	0.0431	1.72e-08	1.69e-07
TGASTMAGC_NFE2_01	195	Genes having at least one occurence of the highly conserved motif M32 TGASTMAGC sites. The motif matches transcription factor binding site V$NFE2_01 (v7.4 TRANSFAC).	17	0.0872	2.16e-08	2.1e-07
CATTGTYY_SOX9_B1	358	Genes having at least one occurence of the highly conserved motif M49 CATTGTYY sites. The motif matches transcription factor binding site V$SOX9_B1 (v7.4 TRANSFAC).	23	0.0642	2.59e-08	2.49e-07
WTTGKCTG_UNKNOWN	516	Genes having at least one occurence of the highly conserved motif M46 WTTGKCTG in the region spanning up to 4 kb around their transcription start sites. The motif does not match any known transcription factor binding site (v7.4 TRANSFAC).	28	0.0543	3.15e-08	2.99e-07
MGGAAGTG_GABP_B	757	Genes having at least one occurence of the highly conserved motif M11 MGGAAGTG sites. The motif matches transcription factor binding site V$GABP_B (v7.4 TRANSFAC).	35	0.0462	3.5e-08	3.29e-07
TGCCTTA_MIR124A	552	Genes having at least one occurence of the motif TGCCTTA in their 3' untranslated region. The motif represents putative target (that is, seed match) of human mature miRNA hsa-miR-124a (v7.1 miRBase).	29	0.0525	3.6e-08	3.34e-07
TTTGTAG_MIR520D	336	Genes having at least one occurence of the motif TTTGTAG in their 3' untranslated region. The motif represents putative target (that is, seed match) of human mature miRNA hsa-miR-520d* (v7.1 miRBase).	22	0.0655	3.71e-08	3.41e-07
TATA_01	255	Genes having at least one occurence of the transcription factor binding site V$TATA_01 (v7.4 TRANSFAC) in the regions spanning up to 4 kb around their transcription starting sites.	19	0.0745	4.15e-08	3.73e-07
AR_01	157	Genes having at least one occurence of the transcription factor binding site V$AR_01 (v7.4 TRANSFAC) in the regions spanning up to 4 kb around their transcription starting sites.	15	0.0955	4.29e-08	3.82e-07
RP58_01	207	Genes having at least one occurence of the transcription factor binding site V$RP58_01 (v7.4 TRANSFAC) in the regions spanning up to 4 kb around their transcription starting sites.	17	0.0821	5.2e-08	4.48e-07
CTTTGTA_MIR524	433	Genes having at least one occurence of the motif CTTTGTA in their 3' untranslated region. The motif represents putative target (that is, seed match) of human mature miRNA hsa-miR-524* (v7.1 miRBase).	25	0.0577	5.25e-08	4.48e-07
AP1_Q6	259	Genes having at least one occurence of the transcription factor binding site V$AP1_Q6 (v7.4 TRANSFAC) in the regions spanning up to 4 kb around their transcription starting sites.	19	0.0734	5.31e-08	4.48e-07
PPAR_DR1_Q2	259	Genes having at least one occurence of the transcription factor binding site V$PPAR_DR1_Q2 (v7.4 TRANSFAC) in the regions spanning up to 4 kb around their transcription starting sites.	19	0.0734	5.31e-08	4.48e-07
GFI1_01	262	Genes having at least one occurence of the transcription factor binding site V$GFI1_01 (v7.4 TRANSFAC) in the regions spanning up to 4 kb around their transcription starting sites.	19	0.0725	6.37e-08	5.33e-07
Gene/Gene Set Overlap Matrix
Entrez Gene Id	Gene Symbol	Gene Description	GGGCGGR_SP1_Q6	TTGTTT_FOXO4_01	TGGAAA_NFAT_Q4_01	AACTTT_UNKNOWN	CAGCTG_AP4_Q5	GGGAGGRR_MAZ_Q6	CAGGTG_E12_Q6	CTTTGT_LEF1_Q2	TATAAA_TATA_01	TGANTCA_AP1_C	SRF_Q4	RYTTCCTG_ETS2_B	SRF_Q6	HNF4ALPHA_Q6	TGCCAAR_NF1_Q6	SRF_Q5_01	TGTTTGY_HNF3_Q6	GGGTGGRR_PAX4_03	GCANCTGNY_MYOD_Q6	WGTTNNNNNAAA_UNKNOWN	SRF_C	RTAAACA_FREAC2_01	GGGYGTGNY_UNKNOWN	TGACATY_UNKNOWN	TTCYRGAA_UNKNOWN	WGGAATGY_TEF1_Q6	SCGGAAGY_ELK1_02	TFIIA_Q6	RNGTGGGC_UNKNOWN	GATA3_01	IRF_Q6	AP1_Q2	TAATTA_CHX10_01	CTTTGA_LEF1_Q2	TGACAGNY_MEIS1_01	TGACCTY_ERR1_Q2	ZIC3_01	HNF3_Q6	TTCYNRGAA_STAT5B_01	AP1_Q4_01	PAX4_01	CACGTG_MYC_Q2	TGGNNNNNNKCCAR_UNKNOWN	AP1FJ_Q2	STAT5A_01	ATF4_Q2	FOX_Q2
3217	HOXB7	homeobox B7	GGGCGGR_SP1_Q6	TTGTTT_FOXO4_01	TGGAAA_NFAT_Q4_01	AACTTT_UNKNOWN		GGGAGGRR_MAZ_Q6	CAGGTG_E12_Q6	CTTTGT_LEF1_Q2												WGTTNNNNNAAA_UNKNOWN									RNGTGGGC_UNKNOWN				TAATTA_CHX10_01	CTTTGA_LEF1_Q2								CACGTG_MYC_Q2
4893	NRAS	neuroblastoma RAS viral (v-ras) oncogene homolog	GGGCGGR_SP1_Q6	TTGTTT_FOXO4_01	TGGAAA_NFAT_Q4_01	AACTTT_UNKNOWN		GGGAGGRR_MAZ_Q6		CTTTGT_LEF1_Q2	TATAAA_TATA_01	TGANTCA_AP1_C						SRF_Q5_01			GCANCTGNY_MYOD_Q6	WGTTNNNNNAAA_UNKNOWN		RTAAACA_FREAC2_01					SCGGAAGY_ELK1_02		RNGTGGGC_UNKNOWN			AP1_Q2						HNF3_Q6		AP1_Q4_01		CACGTG_MYC_Q2
4211	MEIS1	Meis homeobox 1	GGGCGGR_SP1_Q6	TTGTTT_FOXO4_01	TGGAAA_NFAT_Q4_01	AACTTT_UNKNOWN		GGGAGGRR_MAZ_Q6		CTTTGT_LEF1_Q2	TATAAA_TATA_01								TGTTTGY_HNF3_Q6				SRF_C	RTAAACA_FREAC2_01		TGACATY_UNKNOWN			SCGGAAGY_ELK1_02	TFIIA_Q6						CTTTGA_LEF1_Q2	TGACAGNY_MEIS1_01
57556	SEMA6A	sema domain, transmembrane domain (TM), and cytoplasmic domain, (semaphorin) 6A	GGGCGGR_SP1_Q6	TTGTTT_FOXO4_01	TGGAAA_NFAT_Q4_01	AACTTT_UNKNOWN			CAGGTG_E12_Q6	CTTTGT_LEF1_Q2						HNF4ALPHA_Q6	TGCCAAR_NF1_Q6		TGTTTGY_HNF3_Q6	GGGTGGRR_PAX4_03					GGGYGTGNY_UNKNOWN		TTCYRGAA_UNKNOWN
23500	DAAM2	dishevelled associated activator of morphogenesis 2	GGGCGGR_SP1_Q6	TTGTTT_FOXO4_01	TGGAAA_NFAT_Q4_01	AACTTT_UNKNOWN			CAGGTG_E12_Q6																										TAATTA_CHX10_01								PAX4_01					ATF4_Q2
4131	MAP1B	microtubule-associated protein 1B	GGGCGGR_SP1_Q6	TTGTTT_FOXO4_01	TGGAAA_NFAT_Q4_01	AACTTT_UNKNOWN				CTTTGT_LEF1_Q2	TATAAA_TATA_01									GGGTGGRR_PAX4_03		WGTTNNNNNAAA_UNKNOWN			GGGYGTGNY_UNKNOWN	TGACATY_UNKNOWN			SCGGAAGY_ELK1_02						TAATTA_CHX10_01			TGACCTY_ERR1_Q2	ZIC3_01
1831	TSC22D3	TSC22 domain family, member 3	GGGCGGR_SP1_Q6	TTGTTT_FOXO4_01	TGGAAA_NFAT_Q4_01		CAGCTG_AP4_Q5	GGGAGGRR_MAZ_Q6	CAGGTG_E12_Q6	CTTTGT_LEF1_Q2	TATAAA_TATA_01								TGTTTGY_HNF3_Q6		GCANCTGNY_MYOD_Q6			RTAAACA_FREAC2_01						TFIIA_Q6					TAATTA_CHX10_01													ATF4_Q2
284	ANGPT1	angiopoietin 1	GGGCGGR_SP1_Q6	TTGTTT_FOXO4_01	TGGAAA_NFAT_Q4_01		CAGCTG_AP4_Q5		CAGGTG_E12_Q6	CTTTGT_LEF1_Q2	TATAAA_TATA_01	TGANTCA_AP1_C									GCANCTGNY_MYOD_Q6							WGGAATGY_TEF1_Q6		TFIIA_Q6		GATA3_01						TGACCTY_ERR1_Q2					PAX4_01
1264	CNN1	calponin 1, basic, smooth muscle	GGGCGGR_SP1_Q6	TTGTTT_FOXO4_01	TGGAAA_NFAT_Q4_01			GGGAGGRR_MAZ_Q6			TATAAA_TATA_01		SRF_Q4		SRF_Q6		TGCCAAR_NF1_Q6	SRF_Q5_01					SRF_C			TGACATY_UNKNOWN				TFIIA_Q6								TGACCTY_ERR1_Q2
81563	C1orf21	chromosome 1 open reading frame 21	GGGCGGR_SP1_Q6	TTGTTT_FOXO4_01	TGGAAA_NFAT_Q4_01			GGGAGGRR_MAZ_Q6				TGANTCA_AP1_C								GGGTGGRR_PAX4_03								WGGAATGY_TEF1_Q6			RNGTGGGC_UNKNOWN							TGACCTY_ERR1_Q2				AP1_Q4_01	PAX4_01
31	ACACA	acetyl-CoA carboxylase alpha	GGGCGGR_SP1_Q6	TTGTTT_FOXO4_01	TGGAAA_NFAT_Q4_01					CTTTGT_LEF1_Q2																				TFIIA_Q6							TGACAGNY_MEIS1_01			HNF3_Q6				CACGTG_MYC_Q2					FOX_Q2
972	CD74	CD74 molecule, major histocompatibility complex, class II invariant chain	GGGCGGR_SP1_Q6	TTGTTT_FOXO4_01	TGGAAA_NFAT_Q4_01					CTTTGT_LEF1_Q2																					RNGTGGGC_UNKNOWN
5166	PDK4	pyruvate dehydrogenase kinase, isozyme 4	GGGCGGR_SP1_Q6	TTGTTT_FOXO4_01	TGGAAA_NFAT_Q4_01						TATAAA_TATA_01													RTAAACA_FREAC2_01		TGACATY_UNKNOWN
4212	MEIS2	Meis homeobox 2	GGGCGGR_SP1_Q6	TTGTTT_FOXO4_01		AACTTT_UNKNOWN	CAGCTG_AP4_Q5	GGGAGGRR_MAZ_Q6	CAGGTG_E12_Q6	CTTTGT_LEF1_Q2	TATAAA_TATA_01		SRF_Q4	RYTTCCTG_ETS2_B			TGCCAAR_NF1_Q6		TGTTTGY_HNF3_Q6	GGGTGGRR_PAX4_03		WGTTNNNNNAAA_UNKNOWN				TGACATY_UNKNOWN			SCGGAAGY_ELK1_02	TFIIA_Q6	RNGTGGGC_UNKNOWN	GATA3_01	IRF_Q6	AP1_Q2		CTTTGA_LEF1_Q2	TGACAGNY_MEIS1_01	TGACCTY_ERR1_Q2								AP1FJ_Q2
3223	HOXC6	homeobox C6	GGGCGGR_SP1_Q6	TTGTTT_FOXO4_01		AACTTT_UNKNOWN	CAGCTG_AP4_Q5			CTTTGT_LEF1_Q2	TATAAA_TATA_01					HNF4ALPHA_Q6			TGTTTGY_HNF3_Q6	GGGTGGRR_PAX4_03		WGTTNNNNNAAA_UNKNOWN		RTAAACA_FREAC2_01		TGACATY_UNKNOWN										CTTTGA_LEF1_Q2
64084	CLSTN2	calsyntenin 2	GGGCGGR_SP1_Q6	TTGTTT_FOXO4_01		AACTTT_UNKNOWN	CAGCTG_AP4_Q5																												TAATTA_CHX10_01	CTTTGA_LEF1_Q2	TGACAGNY_MEIS1_01
2354	FOSB	FBJ murine osteosarcoma viral oncogene homolog B	GGGCGGR_SP1_Q6	TTGTTT_FOXO4_01		AACTTT_UNKNOWN		GGGAGGRR_MAZ_Q6	CAGGTG_E12_Q6				SRF_Q4		SRF_Q6			SRF_Q5_01	TGTTTGY_HNF3_Q6				SRF_C		GGGYGTGNY_UNKNOWN					TFIIA_Q6										HNF3_Q6								ATF4_Q2
23190	UBXN4	UBX domain protein 4	GGGCGGR_SP1_Q6	TTGTTT_FOXO4_01		AACTTT_UNKNOWN			CAGGTG_E12_Q6
51060	TXNDC12	thioredoxin domain containing 12 (endoplasmic reticulum)	GGGCGGR_SP1_Q6	TTGTTT_FOXO4_01			CAGCTG_AP4_Q5		CAGGTG_E12_Q6															RTAAACA_FREAC2_01					SCGGAAGY_ELK1_02															CACGTG_MYC_Q2
3316	HSPB2	heat shock 27kDa protein 2	GGGCGGR_SP1_Q6	TTGTTT_FOXO4_01			CAGCTG_AP4_Q5										TGCCAAR_NF1_Q6		TGTTTGY_HNF3_Q6								TTCYRGAA_UNKNOWN	WGGAATGY_TEF1_Q6	SCGGAAGY_ELK1_02	TFIIA_Q6									ZIC3_01
92162	TMEM88	transmembrane protein 88	GGGCGGR_SP1_Q6	TTGTTT_FOXO4_01				GGGAGGRR_MAZ_Q6	CAGGTG_E12_Q6		TATAAA_TATA_01									GGGTGGRR_PAX4_03		WGTTNNNNNAAA_UNKNOWN			GGGYGTGNY_UNKNOWN			WGGAATGY_TEF1_Q6			RNGTGGGC_UNKNOWN	GATA3_01								HNF3_Q6
5187	PER1	period homolog 1 (Drosophila)	GGGCGGR_SP1_Q6	TTGTTT_FOXO4_01				GGGAGGRR_MAZ_Q6	CAGGTG_E12_Q6					RYTTCCTG_ETS2_B							GCANCTGNY_MYOD_Q6				GGGYGTGNY_UNKNOWN				SCGGAAGY_ELK1_02							CTTTGA_LEF1_Q2								CACGTG_MYC_Q2
7067	THRA	thyroid hormone receptor, alpha	GGGCGGR_SP1_Q6	TTGTTT_FOXO4_01				GGGAGGRR_MAZ_Q6	CAGGTG_E12_Q6										TGTTTGY_HNF3_Q6	GGGTGGRR_PAX4_03				RTAAACA_FREAC2_01	GGGYGTGNY_UNKNOWN										TAATTA_CHX10_01				ZIC3_01
2289	FKBP5	FK506 binding protein 5	GGGCGGR_SP1_Q6	TTGTTT_FOXO4_01					CAGGTG_E12_Q6	CTTTGT_LEF1_Q2		TGANTCA_AP1_C				HNF4ALPHA_Q6															RNGTGGGC_UNKNOWN				TAATTA_CHX10_01									CACGTG_MYC_Q2
23049	SMG1	smg-1 homolog, phosphatidylinositol 3-kinase-related kinase (C. elegans)	GGGCGGR_SP1_Q6	TTGTTT_FOXO4_01					CAGGTG_E12_Q6					RYTTCCTG_ETS2_B										RTAAACA_FREAC2_01																			PAX4_01	CACGTG_MYC_Q2
57104	PNPLA2	patatin-like phospholipase domain containing 2	GGGCGGR_SP1_Q6	TTGTTT_FOXO4_01					CAGGTG_E12_Q6							HNF4ALPHA_Q6					GCANCTGNY_MYOD_Q6			RTAAACA_FREAC2_01
7082	TJP1	tight junction protein 1 (zona occludens 1)	GGGCGGR_SP1_Q6	TTGTTT_FOXO4_01					CAGGTG_E12_Q6										TGTTTGY_HNF3_Q6		GCANCTGNY_MYOD_Q6					TGACATY_UNKNOWN														HNF3_Q6
22885	ABLIM3	actin binding LIM protein family, member 3	GGGCGGR_SP1_Q6	TTGTTT_FOXO4_01					CAGGTG_E12_Q6															RTAAACA_FREAC2_01
4144	MAT2A	methionine adenosyltransferase II, alpha	GGGCGGR_SP1_Q6	TTGTTT_FOXO4_01						CTTTGT_LEF1_Q2	TATAAA_TATA_01						TGCCAAR_NF1_Q6										TTCYRGAA_UNKNOWN																	CACGTG_MYC_Q2
257106	ARHGAP30	Rho GTPase activating protein 30	GGGCGGR_SP1_Q6	TTGTTT_FOXO4_01						CTTTGT_LEF1_Q2				RYTTCCTG_ETS2_B						GGGTGGRR_PAX4_03		WGTTNNNNNAAA_UNKNOWN		RTAAACA_FREAC2_01		TGACATY_UNKNOWN						GATA3_01					TGACAGNY_MEIS1_01			HNF3_Q6			PAX4_01
91010	FMNL3	formin-like 3	GGGCGGR_SP1_Q6	TTGTTT_FOXO4_01																GGGTGGRR_PAX4_03
4240	MFGE8	milk fat globule-EGF factor 8 protein	GGGCGGR_SP1_Q6	TTGTTT_FOXO4_01																														AP1_Q2
7175	TPR	translocated promoter region (to activated MET oncogene)	GGGCGGR_SP1_Q6	TTGTTT_FOXO4_01																																							PAX4_01
25	ABL1	c-abl oncogene 1, non-receptor tyrosine kinase	GGGCGGR_SP1_Q6		TGGAAA_NFAT_Q4_01	AACTTT_UNKNOWN	CAGCTG_AP4_Q5	GGGAGGRR_MAZ_Q6		CTTTGT_LEF1_Q2				RYTTCCTG_ETS2_B	SRF_Q6								SRF_C			TGACATY_UNKNOWN	TTCYRGAA_UNKNOWN					GATA3_01						TGACCTY_ERR1_Q2
3005	H1F0	H1 histone family, member 0	GGGCGGR_SP1_Q6		TGGAAA_NFAT_Q4_01	AACTTT_UNKNOWN	CAGCTG_AP4_Q5	GGGAGGRR_MAZ_Q6		CTTTGT_LEF1_Q2							TGCCAAR_NF1_Q6		TGTTTGY_HNF3_Q6																	CTTTGA_LEF1_Q2	TGACAGNY_MEIS1_01
3301	DNAJA1	DnaJ (Hsp40) homolog, subfamily A, member 1	GGGCGGR_SP1_Q6		TGGAAA_NFAT_Q4_01	AACTTT_UNKNOWN	CAGCTG_AP4_Q5	GGGAGGRR_MAZ_Q6		CTTTGT_LEF1_Q2																	TTCYRGAA_UNKNOWN		SCGGAAGY_ELK1_02
6464	SHC1	SHC (Src homology 2 domain containing) transforming protein 1	GGGCGGR_SP1_Q6		TGGAAA_NFAT_Q4_01	AACTTT_UNKNOWN		GGGAGGRR_MAZ_Q6						RYTTCCTG_ETS2_B						GGGTGGRR_PAX4_03								WGGAATGY_TEF1_Q6	SCGGAAGY_ELK1_02
8835	SOCS2	suppressor of cytokine signaling 2	GGGCGGR_SP1_Q6		TGGAAA_NFAT_Q4_01	AACTTT_UNKNOWN		GGGAGGRR_MAZ_Q6														WGTTNNNNNAAA_UNKNOWN														CTTTGA_LEF1_Q2		TGACCTY_ERR1_Q2			TTCYNRGAA_STAT5B_01			CACGTG_MYC_Q2			STAT5A_01
4791	NFKB2	nuclear factor of kappa light polypeptide gene enhancer in B-cells 2 (p49/p100)	GGGCGGR_SP1_Q6		TGGAAA_NFAT_Q4_01	AACTTT_UNKNOWN		GGGAGGRR_MAZ_Q6																	GGGYGTGNY_UNKNOWN			WGGAATGY_TEF1_Q6
10808	HSPH1	heat shock 105kDa/110kDa protein 1	GGGCGGR_SP1_Q6		TGGAAA_NFAT_Q4_01	AACTTT_UNKNOWN				CTTTGT_LEF1_Q2																	TTCYRGAA_UNKNOWN		SCGGAAGY_ELK1_02															CACGTG_MYC_Q2
7124	TNF	tumor necrosis factor	GGGCGGR_SP1_Q6		TGGAAA_NFAT_Q4_01	AACTTT_UNKNOWN					TATAAA_TATA_01
5125	PCSK5	proprotein convertase subtilisin/kexin type 5	GGGCGGR_SP1_Q6		TGGAAA_NFAT_Q4_01	AACTTT_UNKNOWN																		RTAAACA_FREAC2_01														TGACCTY_ERR1_Q2
4826	NNAT	neuronatin	GGGCGGR_SP1_Q6		TGGAAA_NFAT_Q4_01		CAGCTG_AP4_Q5	GGGAGGRR_MAZ_Q6	CAGGTG_E12_Q6	CTTTGT_LEF1_Q2					SRF_Q6		TGCCAAR_NF1_Q6				GCANCTGNY_MYOD_Q6						TTCYRGAA_UNKNOWN										TGACAGNY_MEIS1_01	TGACCTY_ERR1_Q2							TGGNNNNNNKCCAR_UNKNOWN
7169	TPM2	tropomyosin 2 (beta)	GGGCGGR_SP1_Q6		TGGAAA_NFAT_Q4_01		CAGCTG_AP4_Q5	GGGAGGRR_MAZ_Q6			TATAAA_TATA_01	TGANTCA_AP1_C	SRF_Q4	RYTTCCTG_ETS2_B	SRF_Q6			SRF_Q5_01			GCANCTGNY_MYOD_Q6																TGACAGNY_MEIS1_01	TGACCTY_ERR1_Q2						CACGTG_MYC_Q2
1674	DES	desmin	GGGCGGR_SP1_Q6		TGGAAA_NFAT_Q4_01		CAGCTG_AP4_Q5	GGGAGGRR_MAZ_Q6			TATAAA_TATA_01	TGANTCA_AP1_C		RYTTCCTG_ETS2_B							GCANCTGNY_MYOD_Q6					TGACATY_UNKNOWN										CTTTGA_LEF1_Q2	TGACAGNY_MEIS1_01
64129	TINAGL1	tubulointerstitial nephritis antigen-like 1	GGGCGGR_SP1_Q6		TGGAAA_NFAT_Q4_01		CAGCTG_AP4_Q5	GGGAGGRR_MAZ_Q6				TGANTCA_AP1_C																WGGAATGY_TEF1_Q6														AP1_Q4_01			TGGNNNNNNKCCAR_UNKNOWN
7158	TP53BP1	tumor protein p53 binding protein 1	GGGCGGR_SP1_Q6		TGGAAA_NFAT_Q4_01		CAGCTG_AP4_Q5		CAGGTG_E12_Q6							HNF4ALPHA_Q6				GGGTGGRR_PAX4_03											RNGTGGGC_UNKNOWN				TAATTA_CHX10_01	CTTTGA_LEF1_Q2		TGACCTY_ERR1_Q2
9854	C2CD2L	C2CD2-like	GGGCGGR_SP1_Q6		TGGAAA_NFAT_Q4_01			GGGAGGRR_MAZ_Q6	CAGGTG_E12_Q6			TGANTCA_AP1_C		RYTTCCTG_ETS2_B						GGGTGGRR_PAX4_03	GCANCTGNY_MYOD_Q6	WGTTNNNNNAAA_UNKNOWN								TFIIA_Q6												AP1_Q4_01		CACGTG_MYC_Q2
57447	NDRG2	NDRG family member 2	GGGCGGR_SP1_Q6		TGGAAA_NFAT_Q4_01			GGGAGGRR_MAZ_Q6		CTTTGT_LEF1_Q2	TATAAA_TATA_01	TGANTCA_AP1_C					TGCCAAR_NF1_Q6			GGGTGGRR_PAX4_03				RTAAACA_FREAC2_01														TGACCTY_ERR1_Q2				AP1_Q4_01						ATF4_Q2
23509	POFUT1	protein O-fucosyltransferase 1	GGGCGGR_SP1_Q6		TGGAAA_NFAT_Q4_01				CAGGTG_E12_Q6		TATAAA_TATA_01										GCANCTGNY_MYOD_Q6															CTTTGA_LEF1_Q2							PAX4_01
23235	SIK2	salt-inducible kinase 2	GGGCGGR_SP1_Q6		TGGAAA_NFAT_Q4_01				CAGGTG_E12_Q6											GGGTGGRR_PAX4_03																		TGACCTY_ERR1_Q2					PAX4_01					ATF4_Q2
25802	LMOD1	leiomodin 1 (smooth muscle)	GGGCGGR_SP1_Q6		TGGAAA_NFAT_Q4_01				CAGGTG_E12_Q6																		TTCYRGAA_UNKNOWN	WGGAATGY_TEF1_Q6																	TGGNNNNNNKCCAR_UNKNOWN
27129	HSPB7	heat shock 27kDa protein family, member 7 (cardiovascular)	GGGCGGR_SP1_Q6		TGGAAA_NFAT_Q4_01						TATAAA_TATA_01	TGANTCA_AP1_C																						AP1_Q2			TGACAGNY_MEIS1_01	TGACCTY_ERR1_Q2	ZIC3_01
9201	DCLK1	doublecortin-like kinase 1	GGGCGGR_SP1_Q6		TGGAAA_NFAT_Q4_01							TGANTCA_AP1_C					TGCCAAR_NF1_Q6																IRF_Q6
1464	CSPG4	chondroitin sulfate proteoglycan 4	GGGCGGR_SP1_Q6		TGGAAA_NFAT_Q4_01							TGANTCA_AP1_C																		TFIIA_Q6							TGACAGNY_MEIS1_01
8660	IRS2	insulin receptor substrate 2	GGGCGGR_SP1_Q6		TGGAAA_NFAT_Q4_01												TGCCAAR_NF1_Q6
3952	LEP	leptin	GGGCGGR_SP1_Q6		TGGAAA_NFAT_Q4_01																GCANCTGNY_MYOD_Q6									TFIIA_Q6											TTCYNRGAA_STAT5B_01						STAT5A_01
8655	DYNLL1	dynein, light chain, LC8-type 1	GGGCGGR_SP1_Q6		TGGAAA_NFAT_Q4_01																				GGGYGTGNY_UNKNOWN		TTCYRGAA_UNKNOWN				RNGTGGGC_UNKNOWN								ZIC3_01
9156	EXO1	exonuclease 1	GGGCGGR_SP1_Q6		TGGAAA_NFAT_Q4_01
147912	SIX5	SIX homeobox 5	GGGCGGR_SP1_Q6			AACTTT_UNKNOWN	CAGCTG_AP4_Q5	GGGAGGRR_MAZ_Q6		CTTTGT_LEF1_Q2												WGTTNNNNNAAA_UNKNOWN						WGGAATGY_TEF1_Q6									TGACAGNY_MEIS1_01
130497	OSR1	odd-skipped related 1 (Drosophila)	GGGCGGR_SP1_Q6			AACTTT_UNKNOWN	CAGCTG_AP4_Q5		CAGGTG_E12_Q6	CTTTGT_LEF1_Q2							TGCCAAR_NF1_Q6			GGGTGGRR_PAX4_03	GCANCTGNY_MYOD_Q6			RTAAACA_FREAC2_01	GGGYGTGNY_UNKNOWN							GATA3_01					TGACAGNY_MEIS1_01							CACGTG_MYC_Q2
127544	RNF19B	ring finger protein 19B	GGGCGGR_SP1_Q6			AACTTT_UNKNOWN	CAGCTG_AP4_Q5				TATAAA_TATA_01										GCANCTGNY_MYOD_Q6				GGGYGTGNY_UNKNOWN											CTTTGA_LEF1_Q2		TGACCTY_ERR1_Q2					PAX4_01
6453	ITSN1	intersectin 1 (SH3 domain protein)	GGGCGGR_SP1_Q6			AACTTT_UNKNOWN	CAGCTG_AP4_Q5																		GGGYGTGNY_UNKNOWN
2309	FOXO3	forkhead box O3	GGGCGGR_SP1_Q6			AACTTT_UNKNOWN		GGGAGGRR_MAZ_Q6		CTTTGT_LEF1_Q2				RYTTCCTG_ETS2_B										RTAAACA_FREAC2_01				WGGAATGY_TEF1_Q6									TGACAGNY_MEIS1_01							CACGTG_MYC_Q2
1271	CNTFR	ciliary neurotrophic factor receptor	GGGCGGR_SP1_Q6			AACTTT_UNKNOWN		GGGAGGRR_MAZ_Q6		CTTTGT_LEF1_Q2						HNF4ALPHA_Q6									GGGYGTGNY_UNKNOWN								IRF_Q6			CTTTGA_LEF1_Q2		TGACCTY_ERR1_Q2	ZIC3_01				PAX4_01
9828	ARHGEF17	Rho guanine nucleotide exchange factor (GEF) 17	GGGCGGR_SP1_Q6			AACTTT_UNKNOWN		GGGAGGRR_MAZ_Q6					SRF_Q4																		RNGTGGGC_UNKNOWN
27244	SESN1	sestrin 1	GGGCGGR_SP1_Q6			AACTTT_UNKNOWN		GGGAGGRR_MAZ_Q6												GGGTGGRR_PAX4_03																	TGACAGNY_MEIS1_01
79191	IRX3	iroquois homeobox 3	GGGCGGR_SP1_Q6			AACTTT_UNKNOWN		GGGAGGRR_MAZ_Q6																		TGACATY_UNKNOWN			SCGGAAGY_ELK1_02
22920	KIFAP3	kinesin-associated protein 3	GGGCGGR_SP1_Q6			AACTTT_UNKNOWN		GGGAGGRR_MAZ_Q6																													TGACAGNY_MEIS1_01
84790	TUBA1C	tubulin, alpha 1c	GGGCGGR_SP1_Q6			AACTTT_UNKNOWN			CAGGTG_E12_Q6			TGANTCA_AP1_C																						AP1_Q2												AP1FJ_Q2
9314	KLF4	Kruppel-like factor 4 (gut)	GGGCGGR_SP1_Q6			AACTTT_UNKNOWN			CAGGTG_E12_Q6																																TTCYNRGAA_STAT5B_01						STAT5A_01
90203	SNX21	sorting nexin family member 21	GGGCGGR_SP1_Q6			AACTTT_UNKNOWN					TATAAA_TATA_01			RYTTCCTG_ETS2_B
7078	TIMP3	TIMP metallopeptidase inhibitor 3	GGGCGGR_SP1_Q6			AACTTT_UNKNOWN											TGCCAAR_NF1_Q6	SRF_Q5_01																					ZIC3_01
25959	KANK2	KN motif and ankyrin repeat domains 2	GGGCGGR_SP1_Q6			AACTTT_UNKNOWN													TGTTTGY_HNF3_Q6																										TGGNNNNNNKCCAR_UNKNOWN
9833	MELK	maternal embryonic leucine zipper kinase	GGGCGGR_SP1_Q6			AACTTT_UNKNOWN
3911	LAMA5	laminin, alpha 5	GGGCGGR_SP1_Q6				CAGCTG_AP4_Q5	GGGAGGRR_MAZ_Q6	CAGGTG_E12_Q6												GCANCTGNY_MYOD_Q6																								TGGNNNNNNKCCAR_UNKNOWN
3880	KRT19	keratin 19	GGGCGGR_SP1_Q6				CAGCTG_AP4_Q5		CAGGTG_E12_Q6			TGANTCA_AP1_C									GCANCTGNY_MYOD_Q6
2819	GPD1	glycerol-3-phosphate dehydrogenase 1 (soluble)	GGGCGGR_SP1_Q6				CAGCTG_AP4_Q5		CAGGTG_E12_Q6					RYTTCCTG_ETS2_B			TGCCAAR_NF1_Q6				GCANCTGNY_MYOD_Q6																							CACGTG_MYC_Q2
64744	SMAP2	small ArfGAP2	GGGCGGR_SP1_Q6				CAGCTG_AP4_Q5		CAGGTG_E12_Q6												GCANCTGNY_MYOD_Q6								SCGGAAGY_ELK1_02					AP1_Q2												AP1FJ_Q2
219654	ZCCHC24	zinc finger, CCHC domain containing 24	GGGCGGR_SP1_Q6				CAGCTG_AP4_Q5			CTTTGT_LEF1_Q2																							IRF_Q6
126393	HSPB6	heat shock protein, alpha-crystallin-related, B6	GGGCGGR_SP1_Q6				CAGCTG_AP4_Q5					TGANTCA_AP1_C									GCANCTGNY_MYOD_Q6																					AP1_Q4_01
6729	SRP54	signal recognition particle 54kDa	GGGCGGR_SP1_Q6				CAGCTG_AP4_Q5						SRF_Q4																SCGGAAGY_ELK1_02
1410	CRYAB	crystallin, alpha B	GGGCGGR_SP1_Q6				CAGCTG_AP4_Q5										TGCCAAR_NF1_Q6										TTCYRGAA_UNKNOWN	WGGAATGY_TEF1_Q6		TFIIA_Q6									ZIC3_01						TGGNNNNNNKCCAR_UNKNOWN
9590	AKAP12	A kinase (PRKA) anchor protein 12	GGGCGGR_SP1_Q6					GGGAGGRR_MAZ_Q6	CAGGTG_E12_Q6	CTTTGT_LEF1_Q2			SRF_Q4										SRF_C			TGACATY_UNKNOWN					RNGTGGGC_UNKNOWN													CACGTG_MYC_Q2
10625	IVNS1ABP	influenza virus NS1A binding protein	GGGCGGR_SP1_Q6					GGGAGGRR_MAZ_Q6	CAGGTG_E12_Q6	CTTTGT_LEF1_Q2							TGCCAAR_NF1_Q6
28999	KLF15	Kruppel-like factor 15	GGGCGGR_SP1_Q6					GGGAGGRR_MAZ_Q6	CAGGTG_E12_Q6
256949	KANK3	KN motif and ankyrin repeat domains 3	GGGCGGR_SP1_Q6					GGGAGGRR_MAZ_Q6	CAGGTG_E12_Q6
9064	MAP3K6	mitogen-activated protein kinase kinase kinase 6	GGGCGGR_SP1_Q6					GGGAGGRR_MAZ_Q6				TGANTCA_AP1_C								GGGTGGRR_PAX4_03							TTCYRGAA_UNKNOWN		SCGGAAGY_ELK1_02
57708	MIER1	mesoderm induction early response 1 homolog (Xenopus laevis)	GGGCGGR_SP1_Q6					GGGAGGRR_MAZ_Q6				TGANTCA_AP1_C																	SCGGAAGY_ELK1_02
5327	PLAT	plasminogen activator, tissue	GGGCGGR_SP1_Q6					GGGAGGRR_MAZ_Q6												GGGTGGRR_PAX4_03							TTCYRGAA_UNKNOWN																		TGGNNNNNNKCCAR_UNKNOWN
65264	UBE2Z	ubiquitin-conjugating enzyme E2Z	GGGCGGR_SP1_Q6					GGGAGGRR_MAZ_Q6												GGGTGGRR_PAX4_03									SCGGAAGY_ELK1_02		RNGTGGGC_UNKNOWN					CTTTGA_LEF1_Q2
3312	HSPA8	heat shock 70kDa protein 8	GGGCGGR_SP1_Q6					GGGAGGRR_MAZ_Q6																			TTCYRGAA_UNKNOWN
55689	YEATS2	YEATS domain containing 2	GGGCGGR_SP1_Q6					GGGAGGRR_MAZ_Q6																					SCGGAAGY_ELK1_02															CACGTG_MYC_Q2
10435	CDC42EP2	CDC42 effector protein (Rho GTPase binding) 2	GGGCGGR_SP1_Q6					GGGAGGRR_MAZ_Q6																								GATA3_01
4852	NPY	neuropeptide Y	GGGCGGR_SP1_Q6					GGGAGGRR_MAZ_Q6																										AP1_Q2						HNF3_Q6						AP1FJ_Q2
10643	IGF2BP3	insulin-like growth factor 2 mRNA binding protein 3	GGGCGGR_SP1_Q6					GGGAGGRR_MAZ_Q6																																				CACGTG_MYC_Q2
5598	MAPK7	mitogen-activated protein kinase 7	GGGCGGR_SP1_Q6					GGGAGGRR_MAZ_Q6
2146	EZH2	enhancer of zeste homolog 2 (Drosophila)	GGGCGGR_SP1_Q6						CAGGTG_E12_Q6	CTTTGT_LEF1_Q2											GCANCTGNY_MYOD_Q6	WGTTNNNNNAAA_UNKNOWN
5058	PAK1	p21 protein (Cdc42/Rac)-activated kinase 1	GGGCGGR_SP1_Q6						CAGGTG_E12_Q6	CTTTGT_LEF1_Q2																																						ATF4_Q2
6525	SMTN	smoothelin	GGGCGGR_SP1_Q6						CAGGTG_E12_Q6			TGANTCA_AP1_C
57510	XPO5	exportin 5	GGGCGGR_SP1_Q6						CAGGTG_E12_Q6					RYTTCCTG_ETS2_B															SCGGAAGY_ELK1_02															CACGTG_MYC_Q2
8322	FZD4	frizzled family receptor 4	GGGCGGR_SP1_Q6						CAGGTG_E12_Q6								TGCCAAR_NF1_Q6			GGGTGGRR_PAX4_03												GATA3_01
8869	ST3GAL5	ST3 beta-galactoside alpha-2,3-sialyltransferase 5	GGGCGGR_SP1_Q6						CAGGTG_E12_Q6												GCANCTGNY_MYOD_Q6																TGACAGNY_MEIS1_01	TGACCTY_ERR1_Q2
23171	GPD1L	glycerol-3-phosphate dehydrogenase 1-like	GGGCGGR_SP1_Q6						CAGGTG_E12_Q6												GCANCTGNY_MYOD_Q6
26985	AP3M1	adaptor-related protein complex 3, mu 1 subunit	GGGCGGR_SP1_Q6						CAGGTG_E12_Q6																						RNGTGGGC_UNKNOWN													CACGTG_MYC_Q2
56650	CLDND1	claudin domain containing 1	GGGCGGR_SP1_Q6						CAGGTG_E12_Q6																													TGACCTY_ERR1_Q2
29911	HOOK2	hook homolog 2 (Drosophila)	GGGCGGR_SP1_Q6						CAGGTG_E12_Q6																														ZIC3_01					CACGTG_MYC_Q2
2875	GPT	glutamic-pyruvate transaminase (alanine aminotransferase)	GGGCGGR_SP1_Q6						CAGGTG_E12_Q6
55012	PPP2R3C	protein phosphatase 2, regulatory subunit B'', gamma	GGGCGGR_SP1_Q6							CTTTGT_LEF1_Q2	TATAAA_TATA_01									GGGTGGRR_PAX4_03									SCGGAAGY_ELK1_02							CTTTGA_LEF1_Q2
5686	PSMA5	proteasome (prosome, macropain) subunit, alpha type, 5	GGGCGGR_SP1_Q6							CTTTGT_LEF1_Q2		TGANTCA_AP1_C										WGTTNNNNNAAA_UNKNOWN							SCGGAAGY_ELK1_02				IRF_Q6
150962	PUS10	pseudouridylate synthase 10	GGGCGGR_SP1_Q6							CTTTGT_LEF1_Q2																					RNGTGGGC_UNKNOWN
8805	TRIM24	tripartite motif containing 24	GGGCGGR_SP1_Q6							CTTTGT_LEF1_Q2																									TAATTA_CHX10_01
4629	MYH11	myosin, heavy chain 11, smooth muscle	GGGCGGR_SP1_Q6								TATAAA_TATA_01		SRF_Q4		SRF_Q6			SRF_Q5_01					SRF_C							TFIIA_Q6
5360	PLTP	phospholipid transfer protein	GGGCGGR_SP1_Q6								TATAAA_TATA_01
5178	PEG3	paternally expressed 3	GGGCGGR_SP1_Q6								TATAAA_TATA_01
7153	TOP2A	topoisomerase (DNA) II alpha 170kDa	GGGCGGR_SP1_Q6								TATAAA_TATA_01
10058	ABCB6	ATP-binding cassette, sub-family B (MDR/TAP), member 6	GGGCGGR_SP1_Q6									TGANTCA_AP1_C					TGCCAAR_NF1_Q6								GGGYGTGNY_UNKNOWN																			CACGTG_MYC_Q2
9956	HS3ST2	heparan sulfate (glucosamine) 3-O-sulfotransferase 2	GGGCGGR_SP1_Q6									TGANTCA_AP1_C								GGGTGGRR_PAX4_03														AP1_Q2								AP1_Q4_01	PAX4_01			AP1FJ_Q2		ATF4_Q2
115572	FAM46B	family with sequence similarity 46, member B	GGGCGGR_SP1_Q6									TGANTCA_AP1_C													GGGYGTGNY_UNKNOWN			WGGAATGY_TEF1_Q6														AP1_Q4_01
51333	ZNF771	zinc finger protein 771	GGGCGGR_SP1_Q6									TGANTCA_AP1_C																						AP1_Q2										CACGTG_MYC_Q2		AP1FJ_Q2
256691	MAMDC2	MAM domain containing 2	GGGCGGR_SP1_Q6									TGANTCA_AP1_C																														AP1_Q4_01
1153	CIRBP	cold inducible RNA binding protein	GGGCGGR_SP1_Q6									TGANTCA_AP1_C																																				ATF4_Q2
7041	TGFB1I1	transforming growth factor beta 1 induced transcript 1	GGGCGGR_SP1_Q6										SRF_Q4		SRF_Q6			SRF_Q5_01					SRF_C		GGGYGTGNY_UNKNOWN						RNGTGGGC_UNKNOWN
79183	TTPAL	tocopherol (alpha) transfer protein-like	GGGCGGR_SP1_Q6											RYTTCCTG_ETS2_B															SCGGAAGY_ELK1_02
4739	NEDD9	neural precursor cell expressed, developmentally down-regulated 9	GGGCGGR_SP1_Q6											RYTTCCTG_ETS2_B																	RNGTGGGC_UNKNOWN					CTTTGA_LEF1_Q2		TGACCTY_ERR1_Q2
8396	PIP4K2B	phosphatidylinositol-5-phosphate 4-kinase, type II, beta	GGGCGGR_SP1_Q6																TGTTTGY_HNF3_Q6												RNGTGGGC_UNKNOWN		IRF_Q6		TAATTA_CHX10_01
367	AR	androgen receptor	GGGCGGR_SP1_Q6																TGTTTGY_HNF3_Q6																	CTTTGA_LEF1_Q2
4692	NDN	necdin homolog (mouse)	GGGCGGR_SP1_Q6																	GGGTGGRR_PAX4_03
114757	CYGB	cytoglobin	GGGCGGR_SP1_Q6																			WGTTNNNNNAAA_UNKNOWN														CTTTGA_LEF1_Q2
4128	MAOA	monoamine oxidase A	GGGCGGR_SP1_Q6																			WGTTNNNNNAAA_UNKNOWN																										ATF4_Q2
9924	PAN2	PAN2 poly(A) specific ribonuclease subunit homolog (S. cerevisiae)	GGGCGGR_SP1_Q6																				SRF_C																		TTCYNRGAA_STAT5B_01						STAT5A_01
84932	RAB2B	RAB2B, member RAS oncogene family	GGGCGGR_SP1_Q6																								TTCYRGAA_UNKNOWN
1479	CSTF3	cleavage stimulation factor, 3' pre-RNA, subunit 3, 77kDa	GGGCGGR_SP1_Q6																										SCGGAAGY_ELK1_02		RNGTGGGC_UNKNOWN
6576	SLC25A1	solute carrier family 25 (mitochondrial carrier; citrate transporter), member 1	GGGCGGR_SP1_Q6																										SCGGAAGY_ELK1_02		RNGTGGGC_UNKNOWN
1743	DLST	dihydrolipoamide S-succinyltransferase (E2 component of 2-oxo-glutarate complex)	GGGCGGR_SP1_Q6																										SCGGAAGY_ELK1_02								TGACAGNY_MEIS1_01
64422	ATG3	ATG3 autophagy related 3 homolog (S. cerevisiae)	GGGCGGR_SP1_Q6																										SCGGAAGY_ELK1_02															CACGTG_MYC_Q2
261726	TIPRL	TIP41, TOR signaling pathway regulator-like (S. cerevisiae)	GGGCGGR_SP1_Q6																										SCGGAAGY_ELK1_02																			ATF4_Q2
9526	MPDU1	mannose-P-dolichol utilization defect 1	GGGCGGR_SP1_Q6																										SCGGAAGY_ELK1_02
5685	PSMA4	proteasome (prosome, macropain) subunit, alpha type, 4	GGGCGGR_SP1_Q6																										SCGGAAGY_ELK1_02
6727	SRP14	signal recognition particle 14kDa (homologous Alu RNA binding protein)	GGGCGGR_SP1_Q6																										SCGGAAGY_ELK1_02
53938	PPIL3	peptidylprolyl isomerase (cyclophilin)-like 3	GGGCGGR_SP1_Q6																										SCGGAAGY_ELK1_02
10555	AGPAT2	1-acylglycerol-3-phosphate O-acyltransferase 2 (lysophosphatidic acid acyltransferase, beta)	GGGCGGR_SP1_Q6																										SCGGAAGY_ELK1_02
5902	RANBP1	RAN binding protein 1	GGGCGGR_SP1_Q6																												RNGTGGGC_UNKNOWN							TGACCTY_ERR1_Q2					PAX4_01	CACGTG_MYC_Q2
51203	NUSAP1	nucleolar and spindle associated protein 1	GGGCGGR_SP1_Q6																																	CTTTGA_LEF1_Q2
55677	IWS1	IWS1 homolog (S. cerevisiae)	GGGCGGR_SP1_Q6																																						TTCYNRGAA_STAT5B_01		PAX4_01				STAT5A_01
5431	POLR2B	polymerase (RNA) II (DNA directed) polypeptide B, 140kDa	GGGCGGR_SP1_Q6																																						TTCYNRGAA_STAT5B_01
5971	RELB	v-rel reticuloendotheliosis viral oncogene homolog B	GGGCGGR_SP1_Q6																																									CACGTG_MYC_Q2				ATF4_Q2
6470	SHMT1	serine hydroxymethyltransferase 1 (soluble)	GGGCGGR_SP1_Q6																																									CACGTG_MYC_Q2
5932	RBBP8	retinoblastoma binding protein 8	GGGCGGR_SP1_Q6																																													ATF4_Q2
92400	RBM18	RNA binding motif protein 18	GGGCGGR_SP1_Q6																																													ATF4_Q2
10491	CRTAP	cartilage associated protein	GGGCGGR_SP1_Q6
9025	RNF8	ring finger protein 8	GGGCGGR_SP1_Q6
387496	RASL11A	RAS-like, family 11, member A	GGGCGGR_SP1_Q6
79038	ZFYVE21	zinc finger, FYVE domain containing 21	GGGCGGR_SP1_Q6
5423	POLB	polymerase (DNA directed), beta	GGGCGGR_SP1_Q6
65109	UPF3B	UPF3 regulator of nonsense transcripts homolog B (yeast)	GGGCGGR_SP1_Q6
8992	ATP6V0E1	ATPase, H+ transporting, lysosomal 9kDa, V0 subunit e1	GGGCGGR_SP1_Q6
25902	MTHFD1L	methylenetetrahydrofolate dehydrogenase (NADP+ dependent) 1-like	GGGCGGR_SP1_Q6
6004	RGS16	regulator of G-protein signaling 16	GGGCGGR_SP1_Q6
83930	STARD3NL	STARD3 N-terminal like	GGGCGGR_SP1_Q6
84417	C2orf40	chromosome 2 open reading frame 40	GGGCGGR_SP1_Q6
11043	MID2	midline 2		TTGTTT_FOXO4_01	TGGAAA_NFAT_Q4_01	AACTTT_UNKNOWN	CAGCTG_AP4_Q5		CAGGTG_E12_Q6		TATAAA_TATA_01									GGGTGGRR_PAX4_03	GCANCTGNY_MYOD_Q6
9249	DHRS3	dehydrogenase/reductase (SDR family) member 3		TTGTTT_FOXO4_01	TGGAAA_NFAT_Q4_01	AACTTT_UNKNOWN	CAGCTG_AP4_Q5		CAGGTG_E12_Q6			TGANTCA_AP1_C				HNF4ALPHA_Q6	TGCCAAR_NF1_Q6					WGTTNNNNNAAA_UNKNOWN		RTAAACA_FREAC2_01													TGACAGNY_MEIS1_01		ZIC3_01			AP1_Q4_01
6016	RIT1	Ras-like without CAAX 1		TTGTTT_FOXO4_01	TGGAAA_NFAT_Q4_01	AACTTT_UNKNOWN	CAGCTG_AP4_Q5			CTTTGT_LEF1_Q2	TATAAA_TATA_01	TGANTCA_AP1_C					TGCCAAR_NF1_Q6					WGTTNNNNNAAA_UNKNOWN																				AP1_Q4_01
3479	IGF1	insulin-like growth factor 1 (somatomedin C)		TTGTTT_FOXO4_01	TGGAAA_NFAT_Q4_01	AACTTT_UNKNOWN	CAGCTG_AP4_Q5				TATAAA_TATA_01			RYTTCCTG_ETS2_B	SRF_Q6					GGGTGGRR_PAX4_03				RTAAACA_FREAC2_01		TGACATY_UNKNOWN						GATA3_01
55885	LMO3	LIM domain only 3 (rhombotin-like 2)		TTGTTT_FOXO4_01	TGGAAA_NFAT_Q4_01	AACTTT_UNKNOWN		GGGAGGRR_MAZ_Q6	CAGGTG_E12_Q6	CTTTGT_LEF1_Q2				RYTTCCTG_ETS2_B		HNF4ALPHA_Q6	TGCCAAR_NF1_Q6				GCANCTGNY_MYOD_Q6	WGTTNNNNNAAA_UNKNOWN		RTAAACA_FREAC2_01		TGACATY_UNKNOWN						GATA3_01			TAATTA_CHX10_01			TGACCTY_ERR1_Q2		HNF3_Q6
5602	MAPK10	mitogen-activated protein kinase 10		TTGTTT_FOXO4_01	TGGAAA_NFAT_Q4_01	AACTTT_UNKNOWN		GGGAGGRR_MAZ_Q6	CAGGTG_E12_Q6			TGANTCA_AP1_C				HNF4ALPHA_Q6			TGTTTGY_HNF3_Q6					RTAAACA_FREAC2_01		TGACATY_UNKNOWN		WGGAATGY_TEF1_Q6		TFIIA_Q6			IRF_Q6			CTTTGA_LEF1_Q2			ZIC3_01		TTCYNRGAA_STAT5B_01		PAX4_01				STAT5A_01
959	CD40LG	CD40 ligand		TTGTTT_FOXO4_01	TGGAAA_NFAT_Q4_01	AACTTT_UNKNOWN		GGGAGGRR_MAZ_Q6	CAGGTG_E12_Q6					RYTTCCTG_ETS2_B							GCANCTGNY_MYOD_Q6					TGACATY_UNKNOWN										CTTTGA_LEF1_Q2					TTCYNRGAA_STAT5B_01						STAT5A_01
133584	EGFLAM	EGF-like, fibronectin type III and laminin G domains		TTGTTT_FOXO4_01	TGGAAA_NFAT_Q4_01	AACTTT_UNKNOWN		GGGAGGRR_MAZ_Q6		CTTTGT_LEF1_Q2				RYTTCCTG_ETS2_B																	RNGTGGGC_UNKNOWN				TAATTA_CHX10_01	CTTTGA_LEF1_Q2													FOX_Q2
6586	SLIT3	slit homolog 3 (Drosophila)		TTGTTT_FOXO4_01	TGGAAA_NFAT_Q4_01	AACTTT_UNKNOWN		GGGAGGRR_MAZ_Q6		CTTTGT_LEF1_Q2						HNF4ALPHA_Q6	TGCCAAR_NF1_Q6		TGTTTGY_HNF3_Q6												RNGTGGGC_UNKNOWN						TGACAGNY_MEIS1_01		ZIC3_01	HNF3_Q6									FOX_Q2
1021	CDK6	cyclin-dependent kinase 6		TTGTTT_FOXO4_01	TGGAAA_NFAT_Q4_01	AACTTT_UNKNOWN		GGGAGGRR_MAZ_Q6		CTTTGT_LEF1_Q2							TGCCAAR_NF1_Q6			GGGTGGRR_PAX4_03					GGGYGTGNY_UNKNOWN	TGACATY_UNKNOWN		WGGAATGY_TEF1_Q6					IRF_Q6						ZIC3_01
388	RHOB	ras homolog gene family, member B		TTGTTT_FOXO4_01	TGGAAA_NFAT_Q4_01	AACTTT_UNKNOWN		GGGAGGRR_MAZ_Q6		CTTTGT_LEF1_Q2
64641	EBF2	early B-cell factor 2		TTGTTT_FOXO4_01	TGGAAA_NFAT_Q4_01	AACTTT_UNKNOWN					TATAAA_TATA_01	TGANTCA_AP1_C					TGCCAAR_NF1_Q6		TGTTTGY_HNF3_Q6			WGTTNNNNNAAA_UNKNOWN				TGACATY_UNKNOWN										CTTTGA_LEF1_Q2				HNF3_Q6					TGGNNNNNNKCCAR_UNKNOWN				FOX_Q2
4774	NFIA	nuclear factor I/A		TTGTTT_FOXO4_01	TGGAAA_NFAT_Q4_01	AACTTT_UNKNOWN								RYTTCCTG_ETS2_B			TGCCAAR_NF1_Q6		TGTTTGY_HNF3_Q6			WGTTNNNNNAAA_UNKNOWN																		HNF3_Q6					TGGNNNNNNKCCAR_UNKNOWN		STAT5A_01		FOX_Q2
4041	LRP5	low density lipoprotein receptor-related protein 5		TTGTTT_FOXO4_01	TGGAAA_NFAT_Q4_01		CAGCTG_AP4_Q5		CAGGTG_E12_Q6	CTTTGT_LEF1_Q2				RYTTCCTG_ETS2_B	SRF_Q6					GGGTGGRR_PAX4_03	GCANCTGNY_MYOD_Q6		SRF_C	RTAAACA_FREAC2_01											TAATTA_CHX10_01			TGACCTY_ERR1_Q2
64925	CCDC71	coiled-coil domain containing 71		TTGTTT_FOXO4_01	TGGAAA_NFAT_Q4_01		CAGCTG_AP4_Q5		CAGGTG_E12_Q6	CTTTGT_LEF1_Q2						HNF4ALPHA_Q6				GGGTGGRR_PAX4_03									SCGGAAGY_ELK1_02
81575	APOLD1	apolipoprotein L domain containing 1		TTGTTT_FOXO4_01	TGGAAA_NFAT_Q4_01		CAGCTG_AP4_Q5				TATAAA_TATA_01			RYTTCCTG_ETS2_B											GGGYGTGNY_UNKNOWN																TTCYNRGAA_STAT5B_01						STAT5A_01
55284	UBE2W	ubiquitin-conjugating enzyme E2W (putative)		TTGTTT_FOXO4_01	TGGAAA_NFAT_Q4_01		CAGCTG_AP4_Q5													GGGTGGRR_PAX4_03							TTCYRGAA_UNKNOWN
1493	CTLA4	cytotoxic T-lymphocyte-associated protein 4		TTGTTT_FOXO4_01	TGGAAA_NFAT_Q4_01						TATAAA_TATA_01																									CTTTGA_LEF1_Q2
64770	CCDC14	coiled-coil domain containing 14		TTGTTT_FOXO4_01	TGGAAA_NFAT_Q4_01							TGANTCA_AP1_C
27198	HCAR1	hydroxycarboxylic acid receptor 1		TTGTTT_FOXO4_01	TGGAAA_NFAT_Q4_01									RYTTCCTG_ETS2_B		HNF4ALPHA_Q6			TGTTTGY_HNF3_Q6
57161	PELI2	pellino homolog 2 (Drosophila)		TTGTTT_FOXO4_01	TGGAAA_NFAT_Q4_01													SRF_Q5_01			GCANCTGNY_MYOD_Q6			RTAAACA_FREAC2_01		TGACATY_UNKNOWN				TFIIA_Q6					TAATTA_CHX10_01		TGACAGNY_MEIS1_01
5281	PIGF	phosphatidylinositol glycan anchor biosynthesis, class F		TTGTTT_FOXO4_01	TGGAAA_NFAT_Q4_01
9457	FHL5	four and a half LIM domains 5		TTGTTT_FOXO4_01	TGGAAA_NFAT_Q4_01
90427	BMF	Bcl2 modifying factor		TTGTTT_FOXO4_01		AACTTT_UNKNOWN	CAGCTG_AP4_Q5	GGGAGGRR_MAZ_Q6	CAGGTG_E12_Q6										TGTTTGY_HNF3_Q6	GGGTGGRR_PAX4_03																												ATF4_Q2
10580	SORBS1	sorbin and SH3 domain containing 1		TTGTTT_FOXO4_01		AACTTT_UNKNOWN	CAGCTG_AP4_Q5	GGGAGGRR_MAZ_Q6	CAGGTG_E12_Q6																	TGACATY_UNKNOWN						GATA3_01				CTTTGA_LEF1_Q2												ATF4_Q2
4094	MAF	v-maf musculoaponeurotic fibrosarcoma oncogene homolog (avian)		TTGTTT_FOXO4_01		AACTTT_UNKNOWN	CAGCTG_AP4_Q5			CTTTGT_LEF1_Q2	TATAAA_TATA_01					HNF4ALPHA_Q6						WGTTNNNNNAAA_UNKNOWN		RTAAACA_FREAC2_01													TGACAGNY_MEIS1_01		ZIC3_01				PAX4_01					ATF4_Q2
54510	PCDH18	protocadherin 18		TTGTTT_FOXO4_01		AACTTT_UNKNOWN	CAGCTG_AP4_Q5			CTTTGT_LEF1_Q2												WGTTNNNNNAAA_UNKNOWN		RTAAACA_FREAC2_01											TAATTA_CHX10_01	CTTTGA_LEF1_Q2
11343	MGLL	monoglyceride lipase		TTGTTT_FOXO4_01		AACTTT_UNKNOWN	CAGCTG_AP4_Q5							RYTTCCTG_ETS2_B					TGTTTGY_HNF3_Q6					RTAAACA_FREAC2_01				WGGAATGY_TEF1_Q6									TGACAGNY_MEIS1_01												FOX_Q2
2690	GHR	growth hormone receptor		TTGTTT_FOXO4_01		AACTTT_UNKNOWN	CAGCTG_AP4_Q5										TGCCAAR_NF1_Q6																						ZIC3_01
3224	HOXC8	homeobox C8		TTGTTT_FOXO4_01		AACTTT_UNKNOWN		GGGAGGRR_MAZ_Q6		CTTTGT_LEF1_Q2														RTAAACA_FREAC2_01
5595	MAPK3	mitogen-activated protein kinase 3		TTGTTT_FOXO4_01		AACTTT_UNKNOWN		GGGAGGRR_MAZ_Q6				TGANTCA_AP1_C							TGTTTGY_HNF3_Q6	GGGTGGRR_PAX4_03				RTAAACA_FREAC2_01										AP1_Q2											TGGNNNNNNKCCAR_UNKNOWN	AP1FJ_Q2
5295	PIK3R1	phosphoinositide-3-kinase, regulatory subunit 1 (alpha)		TTGTTT_FOXO4_01		AACTTT_UNKNOWN			CAGGTG_E12_Q6	CTTTGT_LEF1_Q2				RYTTCCTG_ETS2_B								WGTTNNNNNAAA_UNKNOWN				TGACATY_UNKNOWN	TTCYRGAA_UNKNOWN									CTTTGA_LEF1_Q2					TTCYNRGAA_STAT5B_01
79845	RNF122	ring finger protein 122		TTGTTT_FOXO4_01		AACTTT_UNKNOWN			CAGGTG_E12_Q6	CTTTGT_LEF1_Q2				RYTTCCTG_ETS2_B																					TAATTA_CHX10_01
2643	GCH1	GTP cyclohydrolase 1		TTGTTT_FOXO4_01		AACTTT_UNKNOWN			CAGGTG_E12_Q6	CTTTGT_LEF1_Q2										GGGTGGRR_PAX4_03		WGTTNNNNNAAA_UNKNOWN
7088	TLE1	transducin-like enhancer of split 1 (E(sp1) homolog, Drosophila)		TTGTTT_FOXO4_01		AACTTT_UNKNOWN			CAGGTG_E12_Q6							HNF4ALPHA_Q6								RTAAACA_FREAC2_01												CTTTGA_LEF1_Q2	TGACAGNY_MEIS1_01
7301	TYRO3	TYRO3 protein tyrosine kinase		TTGTTT_FOXO4_01		AACTTT_UNKNOWN			CAGGTG_E12_Q6										TGTTTGY_HNF3_Q6						GGGYGTGNY_UNKNOWN										TAATTA_CHX10_01					HNF3_Q6
7105	TSPAN6	tetraspanin 6		TTGTTT_FOXO4_01		AACTTT_UNKNOWN				CTTTGT_LEF1_Q2							TGCCAAR_NF1_Q6								GGGYGTGNY_UNKNOWN		TTCYRGAA_UNKNOWN														TTCYNRGAA_STAT5B_01						STAT5A_01
2167	FABP4	fatty acid binding protein 4, adipocyte		TTGTTT_FOXO4_01		AACTTT_UNKNOWN						TGANTCA_AP1_C																								CTTTGA_LEF1_Q2				HNF3_Q6		AP1_Q4_01							FOX_Q2
22806	IKZF3	IKAROS family zinc finger 3 (Aiolos)		TTGTTT_FOXO4_01		AACTTT_UNKNOWN													TGTTTGY_HNF3_Q6																	CTTTGA_LEF1_Q2								CACGTG_MYC_Q2
8404	SPARCL1	SPARC-like 1 (hevin)		TTGTTT_FOXO4_01		AACTTT_UNKNOWN																															TGACAGNY_MEIS1_01
845	CASQ2	calsequestrin 2 (cardiac muscle)		TTGTTT_FOXO4_01		AACTTT_UNKNOWN																																TGACCTY_ERR1_Q2											FOX_Q2
8555	CDC14B	CDC14 cell division cycle 14 homolog B (S. cerevisiae)		TTGTTT_FOXO4_01		AACTTT_UNKNOWN																																										ATF4_Q2
3215	HOXB5	homeobox B5		TTGTTT_FOXO4_01			CAGCTG_AP4_Q5	GGGAGGRR_MAZ_Q6	CAGGTG_E12_Q6	CTTTGT_LEF1_Q2	TATAAA_TATA_01		SRF_Q4		SRF_Q6			SRF_Q5_01					SRF_C															TGACCTY_ERR1_Q2						CACGTG_MYC_Q2
3489	IGFBP6	insulin-like growth factor binding protein 6		TTGTTT_FOXO4_01			CAGCTG_AP4_Q5	GGGAGGRR_MAZ_Q6	CAGGTG_E12_Q6	CTTTGT_LEF1_Q2		TGANTCA_AP1_C					TGCCAAR_NF1_Q6			GGGTGGRR_PAX4_03	GCANCTGNY_MYOD_Q6	WGTTNNNNNAAA_UNKNOWN		RTAAACA_FREAC2_01		TGACATY_UNKNOWN		WGGAATGY_TEF1_Q6						AP1_Q2												AP1FJ_Q2
1942	EFNA1	ephrin-A1		TTGTTT_FOXO4_01			CAGCTG_AP4_Q5	GGGAGGRR_MAZ_Q6	CAGGTG_E12_Q6	CTTTGT_LEF1_Q2		TGANTCA_AP1_C							TGTTTGY_HNF3_Q6		GCANCTGNY_MYOD_Q6													AP1_Q2	TAATTA_CHX10_01											AP1FJ_Q2			FOX_Q2
5330	PLCB2	phospholipase C, beta 2		TTGTTT_FOXO4_01			CAGCTG_AP4_Q5	GGGAGGRR_MAZ_Q6	CAGGTG_E12_Q6					RYTTCCTG_ETS2_B										RTAAACA_FREAC2_01													TGACAGNY_MEIS1_01
1958	EGR1	early growth response 1		TTGTTT_FOXO4_01			CAGCTG_AP4_Q5	GGGAGGRR_MAZ_Q6					SRF_Q4	RYTTCCTG_ETS2_B	SRF_Q6			SRF_Q5_01					SRF_C						SCGGAAGY_ELK1_02	TFIIA_Q6
8857	FCGBP	Fc fragment of IgG binding protein		TTGTTT_FOXO4_01			CAGCTG_AP4_Q5		CAGGTG_E12_Q6					RYTTCCTG_ETS2_B					TGTTTGY_HNF3_Q6	GGGTGGRR_PAX4_03	GCANCTGNY_MYOD_Q6																								TGGNNNNNNKCCAR_UNKNOWN
23180	RFTN1	raftlin, lipid raft linker 1		TTGTTT_FOXO4_01			CAGCTG_AP4_Q5		CAGGTG_E12_Q6										TGTTTGY_HNF3_Q6							TGACATY_UNKNOWN
54541	DDIT4	DNA-damage-inducible transcript 4		TTGTTT_FOXO4_01			CAGCTG_AP4_Q5			CTTTGT_LEF1_Q2				RYTTCCTG_ETS2_B			TGCCAAR_NF1_Q6			GGGTGGRR_PAX4_03	GCANCTGNY_MYOD_Q6			RTAAACA_FREAC2_01	GGGYGTGNY_UNKNOWN
84913	ATOH8	atonal homolog 8 (Drosophila)		TTGTTT_FOXO4_01			CAGCTG_AP4_Q5			CTTTGT_LEF1_Q2				RYTTCCTG_ETS2_B					TGTTTGY_HNF3_Q6	GGGTGGRR_PAX4_03	GCANCTGNY_MYOD_Q6	WGTTNNNNNAAA_UNKNOWN																		HNF3_Q6				CACGTG_MYC_Q2		AP1FJ_Q2			FOX_Q2
54873	PALMD	palmdelphin		TTGTTT_FOXO4_01			CAGCTG_AP4_Q5										TGCCAAR_NF1_Q6		TGTTTGY_HNF3_Q6																					HNF3_Q6									FOX_Q2
5348	FXYD1	FXYD domain containing ion transport regulator 1		TTGTTT_FOXO4_01				GGGAGGRR_MAZ_Q6	CAGGTG_E12_Q6		TATAAA_TATA_01					HNF4ALPHA_Q6										TGACATY_UNKNOWN												TGACCTY_ERR1_Q2							TGGNNNNNNKCCAR_UNKNOWN
8854	ALDH1A2	aldehyde dehydrogenase 1 family, member A2		TTGTTT_FOXO4_01				GGGAGGRR_MAZ_Q6	CAGGTG_E12_Q6		TATAAA_TATA_01								TGTTTGY_HNF3_Q6
79990	PLEKHH3	pleckstrin homology domain containing, family H (with MyTH4 domain) member 3		TTGTTT_FOXO4_01				GGGAGGRR_MAZ_Q6	CAGGTG_E12_Q6			TGANTCA_AP1_C									GCANCTGNY_MYOD_Q6							WGGAATGY_TEF1_Q6						AP1_Q2								AP1_Q4_01	PAX4_01			AP1FJ_Q2		ATF4_Q2
3021	H3F3B	H3 histone, family 3B (H3.3B)		TTGTTT_FOXO4_01				GGGAGGRR_MAZ_Q6		CTTTGT_LEF1_Q2	TATAAA_TATA_01	TGANTCA_AP1_C												RTAAACA_FREAC2_01		TGACATY_UNKNOWN					RNGTGGGC_UNKNOWN											AP1_Q4_01
4487	MSX1	msh homeobox 1		TTGTTT_FOXO4_01				GGGAGGRR_MAZ_Q6		CTTTGT_LEF1_Q2			SRF_Q4	RYTTCCTG_ETS2_B	SRF_Q6																		IRF_Q6		TAATTA_CHX10_01	CTTTGA_LEF1_Q2		TGACCTY_ERR1_Q2
55890	GPRC5C	G protein-coupled receptor, family C, group 5, member C		TTGTTT_FOXO4_01				GGGAGGRR_MAZ_Q6		CTTTGT_LEF1_Q2									TGTTTGY_HNF3_Q6					RTAAACA_FREAC2_01				WGGAATGY_TEF1_Q6			RNGTGGGC_UNKNOWN				TAATTA_CHX10_01				ZIC3_01					CACGTG_MYC_Q2	TGGNNNNNNKCCAR_UNKNOWN				FOX_Q2
4026	LPP	LIM domain containing preferred translocation partner in lipoma		TTGTTT_FOXO4_01				GGGAGGRR_MAZ_Q6				TGANTCA_AP1_C	SRF_Q4		SRF_Q6			SRF_Q5_01				WGTTNNNNNAAA_UNKNOWN	SRF_C	RTAAACA_FREAC2_01		TGACATY_UNKNOWN								AP1_Q2												AP1FJ_Q2		ATF4_Q2
1152	CKB	creatine kinase, brain		TTGTTT_FOXO4_01					CAGGTG_E12_Q6	CTTTGT_LEF1_Q2	TATAAA_TATA_01																				RNGTGGGC_UNKNOWN							TGACCTY_ERR1_Q2
9244	CRLF1	cytokine receptor-like factor 1		TTGTTT_FOXO4_01					CAGGTG_E12_Q6	CTTTGT_LEF1_Q2										GGGTGGRR_PAX4_03	GCANCTGNY_MYOD_Q6				GGGYGTGNY_UNKNOWN			WGGAATGY_TEF1_Q6				GATA3_01
5064	PALM	paralemmin		TTGTTT_FOXO4_01					CAGGTG_E12_Q6	CTTTGT_LEF1_Q2														RTAAACA_FREAC2_01	GGGYGTGNY_UNKNOWN
1028	CDKN1C	cyclin-dependent kinase inhibitor 1C (p57, Kip2)		TTGTTT_FOXO4_01					CAGGTG_E12_Q6	CTTTGT_LEF1_Q2														RTAAACA_FREAC2_01
80212	CCDC92	coiled-coil domain containing 92		TTGTTT_FOXO4_01					CAGGTG_E12_Q6	CTTTGT_LEF1_Q2																												TGACCTY_ERR1_Q2							TGGNNNNNNKCCAR_UNKNOWN
9308	CD83	CD83 molecule		TTGTTT_FOXO4_01					CAGGTG_E12_Q6
2791	GNG11	guanine nucleotide binding protein (G protein), gamma 11		TTGTTT_FOXO4_01						CTTTGT_LEF1_Q2				RYTTCCTG_ETS2_B											GGGYGTGNY_UNKNOWN
6480	ST6GAL1	ST6 beta-galactosamide alpha-2,6-sialyltranferase 1		TTGTTT_FOXO4_01						CTTTGT_LEF1_Q2																																		CACGTG_MYC_Q2
2745	GLRX	glutaredoxin (thioltransferase)		TTGTTT_FOXO4_01						CTTTGT_LEF1_Q2
64102	TNMD	tenomodulin		TTGTTT_FOXO4_01							TATAAA_TATA_01		SRF_Q4		SRF_Q6			SRF_Q5_01	TGTTTGY_HNF3_Q6		GCANCTGNY_MYOD_Q6						TTCYRGAA_UNKNOWN									CTTTGA_LEF1_Q2				HNF3_Q6
1690	COCH	coagulation factor C homolog, cochlin (Limulus polyphemus)		TTGTTT_FOXO4_01							TATAAA_TATA_01													RTAAACA_FREAC2_01													TGACAGNY_MEIS1_01
948	CD36	CD36 molecule (thrombospondin receptor)		TTGTTT_FOXO4_01							TATAAA_TATA_01																								TAATTA_CHX10_01
5159	PDGFRB	platelet-derived growth factor receptor, beta polypeptide		TTGTTT_FOXO4_01								TGANTCA_AP1_C		RYTTCCTG_ETS2_B																	RNGTGGGC_UNKNOWN		IRF_Q6	AP1_Q2											TGGNNNNNNKCCAR_UNKNOWN	AP1FJ_Q2
3915	LAMC1	laminin, gamma 1 (formerly LAMB2)		TTGTTT_FOXO4_01								TGANTCA_AP1_C																						AP1_Q2	TAATTA_CHX10_01							AP1_Q4_01				AP1FJ_Q2
83660	TLN2	talin 2		TTGTTT_FOXO4_01								TGANTCA_AP1_C
9807	IP6K1	inositol hexakisphosphate kinase 1		TTGTTT_FOXO4_01									SRF_Q4
54840	APTX	aprataxin		TTGTTT_FOXO4_01													TGCCAAR_NF1_Q6												SCGGAAGY_ELK1_02			GATA3_01
26191	PTPN22	protein tyrosine phosphatase, non-receptor type 22 (lymphoid)		TTGTTT_FOXO4_01															TGTTTGY_HNF3_Q6
8991	SELENBP1	selenium binding protein 1		TTGTTT_FOXO4_01															TGTTTGY_HNF3_Q6
51655	RASD1	RAS, dexamethasone-induced 1		TTGTTT_FOXO4_01																				RTAAACA_FREAC2_01
6038	RNASE4	ribonuclease, RNase A family, 4		TTGTTT_FOXO4_01																																	TGACAGNY_MEIS1_01
23460	ABCA6	ATP-binding cassette, sub-family A (ABC1), member 6		TTGTTT_FOXO4_01
858	CAV2	caveolin 2		TTGTTT_FOXO4_01
25966	C2CD2	C2 calcium-dependent domain containing 2		TTGTTT_FOXO4_01
10418	SPON1	spondin 1, extracellular matrix protein		TTGTTT_FOXO4_01
55276	PGM2	phosphoglucomutase 2		TTGTTT_FOXO4_01
9912	ARHGAP44	Rho GTPase activating protein 44			TGGAAA_NFAT_Q4_01	AACTTT_UNKNOWN	CAGCTG_AP4_Q5	GGGAGGRR_MAZ_Q6	CAGGTG_E12_Q6										TGTTTGY_HNF3_Q6	GGGTGGRR_PAX4_03															TAATTA_CHX10_01									CACGTG_MYC_Q2
3202	HOXA5	homeobox A5			TGGAAA_NFAT_Q4_01	AACTTT_UNKNOWN	CAGCTG_AP4_Q5			CTTTGT_LEF1_Q2			SRF_Q4		SRF_Q6					GGGTGGRR_PAX4_03	GCANCTGNY_MYOD_Q6	WGTTNNNNNAAA_UNKNOWN	SRF_C	RTAAACA_FREAC2_01											TAATTA_CHX10_01			TGACCTY_ERR1_Q2
27303	RBMS3	RNA binding motif, single stranded interacting protein 3			TGGAAA_NFAT_Q4_01	AACTTT_UNKNOWN	CAGCTG_AP4_Q5			CTTTGT_LEF1_Q2						HNF4ALPHA_Q6				GGGTGGRR_PAX4_03		WGTTNNNNNAAA_UNKNOWN						WGGAATGY_TEF1_Q6			RNGTGGGC_UNKNOWN												PAX4_01
800	CALD1	caldesmon 1			TGGAAA_NFAT_Q4_01	AACTTT_UNKNOWN		GGGAGGRR_MAZ_Q6		CTTTGT_LEF1_Q2	TATAAA_TATA_01		SRF_Q4	RYTTCCTG_ETS2_B	SRF_Q6		TGCCAAR_NF1_Q6	SRF_Q5_01	TGTTTGY_HNF3_Q6			WGTTNNNNNAAA_UNKNOWN	SRF_C	RTAAACA_FREAC2_01		TGACATY_UNKNOWN					RNGTGGGC_UNKNOWN				TAATTA_CHX10_01		TGACAGNY_MEIS1_01			HNF3_Q6
55022	PID1	phosphotyrosine interaction domain containing 1			TGGAAA_NFAT_Q4_01	AACTTT_UNKNOWN										HNF4ALPHA_Q6	TGCCAAR_NF1_Q6																			CTTTGA_LEF1_Q2
8942	KYNU	kynureninase			TGGAAA_NFAT_Q4_01	AACTTT_UNKNOWN										HNF4ALPHA_Q6				GGGTGGRR_PAX4_03													IRF_Q6			CTTTGA_LEF1_Q2
84152	PPP1R1B	protein phosphatase 1, regulatory (inhibitor) subunit 1B			TGGAAA_NFAT_Q4_01	AACTTT_UNKNOWN													TGTTTGY_HNF3_Q6							TGACATY_UNKNOWN									TAATTA_CHX10_01	CTTTGA_LEF1_Q2	TGACAGNY_MEIS1_01							CACGTG_MYC_Q2
10252	SPRY1	sprouty homolog 1, antagonist of FGF signaling (Drosophila)			TGGAAA_NFAT_Q4_01	AACTTT_UNKNOWN													TGTTTGY_HNF3_Q6																TAATTA_CHX10_01										TGGNNNNNNKCCAR_UNKNOWN
256435	ST6GALNAC3	ST6 (alpha-N-acetyl-neuraminyl-2,3-beta-galactosyl-1,3)-N-acetylgalactosaminide alpha-2,6-sialyltransferase 3			TGGAAA_NFAT_Q4_01	AACTTT_UNKNOWN
286753	TUSC5	tumor suppressor candidate 5			TGGAAA_NFAT_Q4_01	AACTTT_UNKNOWN
8406	SRPX	sushi-repeat containing protein, X-linked			TGGAAA_NFAT_Q4_01		CAGCTG_AP4_Q5	GGGAGGRR_MAZ_Q6		CTTTGT_LEF1_Q2															GGGYGTGNY_UNKNOWN																TTCYNRGAA_STAT5B_01						STAT5A_01
273	AMPH	amphiphysin			TGGAAA_NFAT_Q4_01		CAGCTG_AP4_Q5	GGGAGGRR_MAZ_Q6																														TGACCTY_ERR1_Q2
127435	PODN	podocan			TGGAAA_NFAT_Q4_01		CAGCTG_AP4_Q5		CAGGTG_E12_Q6			TGANTCA_AP1_C	SRF_Q4		SRF_Q6	HNF4ALPHA_Q6	TGCCAAR_NF1_Q6	SRF_Q5_01		GGGTGGRR_PAX4_03					GGGYGTGNY_UNKNOWN							GATA3_01													TGGNNNNNNKCCAR_UNKNOWN
5376	PMP22	peripheral myelin protein 22			TGGAAA_NFAT_Q4_01		CAGCTG_AP4_Q5		CAGGTG_E12_Q6			TGANTCA_AP1_C								GGGTGGRR_PAX4_03					GGGYGTGNY_UNKNOWN
4803	NGF	nerve growth factor (beta polypeptide)			TGGAAA_NFAT_Q4_01		CAGCTG_AP4_Q5		CAGGTG_E12_Q6												GCANCTGNY_MYOD_Q6
51285	RASL12	RAS-like, family 12			TGGAAA_NFAT_Q4_01		CAGCTG_AP4_Q5		CAGGTG_E12_Q6
347	APOD	apolipoprotein D			TGGAAA_NFAT_Q4_01		CAGCTG_AP4_Q5			CTTTGT_LEF1_Q2	TATAAA_TATA_01														GGGYGTGNY_UNKNOWN
11311	VPS45	vacuolar protein sorting 45 homolog (S. cerevisiae)			TGGAAA_NFAT_Q4_01		CAGCTG_AP4_Q5																												TAATTA_CHX10_01
6711	SPTBN1	spectrin, beta, non-erythrocytic 1			TGGAAA_NFAT_Q4_01		CAGCTG_AP4_Q5
5549	PRELP	proline/arginine-rich end leucine-rich repeat protein			TGGAAA_NFAT_Q4_01			GGGAGGRR_MAZ_Q6	CAGGTG_E12_Q6						SRF_Q6		TGCCAAR_NF1_Q6		TGTTTGY_HNF3_Q6	GGGTGGRR_PAX4_03
54206	ERRFI1	ERBB receptor feedback inhibitor 1			TGGAAA_NFAT_Q4_01			GGGAGGRR_MAZ_Q6	CAGGTG_E12_Q6										TGTTTGY_HNF3_Q6		GCANCTGNY_MYOD_Q6																TGACAGNY_MEIS1_01	TGACCTY_ERR1_Q2		HNF3_Q6									FOX_Q2
220296	HEPACAM	hepatic and glial cell adhesion molecule			TGGAAA_NFAT_Q4_01			GGGAGGRR_MAZ_Q6		CTTTGT_LEF1_Q2																					RNGTGGGC_UNKNOWN
2934	GSN	gelsolin			TGGAAA_NFAT_Q4_01			GGGAGGRR_MAZ_Q6		CTTTGT_LEF1_Q2																								AP1_Q2												AP1FJ_Q2
11034	DSTN	destrin (actin depolymerizing factor)			TGGAAA_NFAT_Q4_01				CAGGTG_E12_Q6		TATAAA_TATA_01	TGANTCA_AP1_C	SRF_Q4					SRF_Q5_01					SRF_C											AP1_Q2												AP1FJ_Q2
4023	LPL	lipoprotein lipase			TGGAAA_NFAT_Q4_01				CAGGTG_E12_Q6		TATAAA_TATA_01
83699	SH3BGRL2	SH3 domain binding glutamic acid-rich protein like 2			TGGAAA_NFAT_Q4_01				CAGGTG_E12_Q6											GGGTGGRR_PAX4_03								WGGAATGY_TEF1_Q6							TAATTA_CHX10_01
23368	PPP1R13B	protein phosphatase 1, regulatory subunit 13B			TGGAAA_NFAT_Q4_01				CAGGTG_E12_Q6																										TAATTA_CHX10_01
7168	TPM1	tropomyosin 1 (alpha)			TGGAAA_NFAT_Q4_01					CTTTGT_LEF1_Q2			SRF_Q4			HNF4ALPHA_Q6												WGGAATGY_TEF1_Q6															PAX4_01
27032	ATP2C1	ATPase, Ca++ transporting, type 2C, member 1			TGGAAA_NFAT_Q4_01					CTTTGT_LEF1_Q2									TGTTTGY_HNF3_Q6			WGTTNNNNNAAA_UNKNOWN			GGGYGTGNY_UNKNOWN		TTCYRGAA_UNKNOWN		SCGGAAGY_ELK1_02			GATA3_01					TGACAGNY_MEIS1_01
10742	RAI2	retinoic acid induced 2			TGGAAA_NFAT_Q4_01						TATAAA_TATA_01				SRF_Q6			SRF_Q5_01
9068	ANGPTL1	angiopoietin-like 1			TGGAAA_NFAT_Q4_01						TATAAA_TATA_01								TGTTTGY_HNF3_Q6												RNGTGGGC_UNKNOWN									HNF3_Q6									FOX_Q2
91768	CABLES1	Cdk5 and Abl enzyme substrate 1			TGGAAA_NFAT_Q4_01						TATAAA_TATA_01															TGACATY_UNKNOWN
83643	CCDC3	coiled-coil domain containing 3			TGGAAA_NFAT_Q4_01						TATAAA_TATA_01
[truncated: 459 more rows]
[truncated: 53 more columns]

## Sheet: GWAS mono
Mapped genes	SAMPLE SIZE	LINK	STUDY	DISEASE/TRAIT
[truncated: 353 more rows]

[truncated: 1 more sheets: GSEA IL6STAT3]
