# Supplementary material for: An evolutionary recent IFN/IL-6/CEBP axis is linked to monocyte expansion and tuberculosis severity in humans
Source: eLife. 2019 Oct 22;8:e47013. doi: 10.7554/eLife.47013 (PMC6819084; doi:10.7554/eLife.47013)
Supplement: Supplementary file 3. [file elife-47013-supp3.xlsx]

## Sheet: S3A
Supplementary Table 3B: Human adaptation z-scores for IL6/IL6R/CEBP CD34 myeloid gene module
Gene symbol	EntrezID	standardized z-score	z-score	chr	top SNP		Category
CEBPB	1051	1.72721	2.57638	20	rs6020363		IL6 signaling
CEBPD	1052	0.523121	0.682429	8	rs10088698		shared IFN/IL6 signaling
IL6	3569	1.46548	2.54582	7	rs7782803		CD34 myeloid differentiation
IL6R	3570	-1.03565	0.777191	1	rs4129267		CD34+Mtb upregulated + ML ratio genes with Neandertal introgression
IL6ST	3572	1.09633	2.18354	5	rs2228046
SOCS1	8651	0.857593	1.97463	16	rs1646066		Human adaptation gene-specific z-scores derived by Daub et al. 2013.
SOCS3	9021	-0.373308	1.33139	17	rs4969168		Molecular Biology and Evolution, Volume 30, Issue 7, 1 July 2013, Pages 1544–1558
STAT3	6774	0.599914	1.60939	17	rs10153241		https://doi.org/10.1093/molbev/mst080
CEBPA	1050	-0.975869	0.893204	19	rs889109
CEBPE	1053	-1.17833	0.28346	14	rs7155790
CEBPG	1054	0.348477	1.52236	19	rs10518275
CEBPZ	10153	-0.0607481	1.11677	2	rs2430491
CD14	929	-1.2057	0.263055	5	rs7721577
CD34	947	-0.435576	1.45448	1	rs1028400
CD38	952	0.338776	1.87677	4	rs2215199
ELF1	1997	0.286786	1.71613	13	rs7329174
IRF8	3394	-0.405376	1.69766	16	rs11863484
KITLG	4254	1.072	2.2352	12	rs10777131
SPI1	6688	-0.719135	0.453734	11	rs3740689
CXCL9	4283	0.402761	0.965265	4	rs2276885
IFNAR1	3454	-1.06424	0.75851	21	rs2834197
IRF1	3659	-0.456439	1.28293	5	rs12521868
STAT1	6772	-0.52248	1.24444	2	rs7562024
STAT2	6773	2.31006	2.45711	12	rs2066808
MT2A	4502	0.536233	1.19602	16	rs2161737
OAS1	4938	0.736738	1.71141	12	rs7955146
OAS2	4939	-0.130097	1.47314	12	rs7960646

## Sheet: S3B
Supplementary Table 3C: Gene set enrichment of Top500 human adaptation genes		GSEA Hallmark curated gene sets	Human adaptation gene-specific z-scores derived by Daub et al. 2013.
# overlaps shown:	16		Molecular Biology and Evolution, Volume 30, Issue 7, 1 July 2013, Pages 1544–1558
# genesets in collections:	50		https://doi.org/10.1093/molbev/mst080
# genes in comparison (n):	491
# genes in universe (N):	45956
Gene Set Name	# Genes in Gene Set (K)	Description	# Genes in Overlap (k)	k/K	p-value	FDR q-value
HALLMARK_EPITHELIAL_MESENCHYMAL_TRANSITION	200	Genes defining epithelial-mesenchymal transition, as in wound healing, fibrosis and metastasis.	13	0.065	2.92e-07	1.46e-05
HALLMARK_IL2_STAT5_SIGNALING	200	Genes up-regulated by STAT5 in response to IL2 stimulation.	12	0.06	1.93e-06	4.83e-05
HALLMARK_ESTROGEN_RESPONSE_EARLY	200	Genes defining early response to estrogen.	11	0.055	1.18e-05	0.000196
HALLMARK_ESTROGEN_RESPONSE_LATE	200	Genes defining late response to estrogen.	9	0.045	0.000329	0.00411
HALLMARK_BILE_ACID_METABOLISM	112	Genes involve in metabolism of bile acids and salts.	6	0.0536	0.00133	0.00929
HALLMARK_KRAS_SIGNALING_UP	200	Genes up-regulated by KRAS activation.	8	0.04	0.00149	0.00929
HALLMARK_MITOTIC_SPINDLE	200	Genes important for mitotic spindle assembly.	8	0.04	0.00149	0.00929
HALLMARK_MYOGENESIS	200	Genes involved in development of skeletal muscle (myogenesis).	8	0.04	0.00149	0.00929
HALLMARK_IL6_JAK_STAT3_SIGNALING	87	Genes up-regulated by IL6 [GeneID=3569] via STAT3 [GeneID=6774], e.g., during acute phase response.	5	0.0575	0.00246	0.0133
HALLMARK_TGF_BETA_SIGNALING	54	Genes up-regulated in response to TGFB1 [GeneID=7040].	4	0.0741	0.00267	0.0133
HALLMARK_UV_RESPONSE_DN	144	Genes down-regulated in response to ultraviolet (UV) radiation.	6	0.0417	0.00466	0.0194
HALLMARK_ANDROGEN_RESPONSE	101	Genes defining response to androgens.	5	0.0495	0.00467	0.0194
HALLMARK_APICAL_JUNCTION	200	Genes encoding components of apical junction complex.	7	0.035	0.00597	0.0199
HALLMARK_COMPLEMENT	200	Genes encoding components of the complement system, which is part of the innate immune system.	7	0.035	0.00597	0.0199
HALLMARK_INTERFERON_GAMMA_RESPONSE	200	Genes up-regulated in response to IFNG [GeneID=3458].	7	0.035	0.00597	0.0199
HALLMARK_CHOLESTEROL_HOMEOSTASIS	74	Genes involved in cholesterol homeostasis.	4	0.0541	0.00822	0.0257
Gene/Gene Set Overlap Matrix
Entrez Gene Id	Gene Symbol	Gene Description	HALLMARK_EPITHELIAL_MESENCHYMAL_TRANSITION	HALLMARK_IL2_STAT5_SIGNALING	HALLMARK_ESTROGEN_RESPONSE_EARLY	HALLMARK_ESTROGEN_RESPONSE_LATE	HALLMARK_BILE_ACID_METABOLISM	HALLMARK_KRAS_SIGNALING_UP	HALLMARK_MITOTIC_SPINDLE	HALLMARK_MYOGENESIS	HALLMARK_IL6_JAK_STAT3_SIGNALING	HALLMARK_TGF_BETA_SIGNALING	HALLMARK_UV_RESPONSE_DN	HALLMARK_ANDROGEN_RESPONSE	HALLMARK_APICAL_JUNCTION	HALLMARK_COMPLEMENT	HALLMARK_INTERFERON_GAMMA_RESPONSE	HALLMARK_CHOLESTEROL_HOMEOSTASIS
5329	PLAUR	plasminogen activator, urokinase receptor	HALLMARK_EPITHELIAL_MESENCHYMAL_TRANSITION					HALLMARK_KRAS_SIGNALING_UP								HALLMARK_COMPLEMENT		HALLMARK_CHOLESTEROL_HOMEOSTASIS
667	DST	dystonin	HALLMARK_EPITHELIAL_MESENCHYMAL_TRANSITION						HALLMARK_MITOTIC_SPINDLE
1284	COL4A2	collagen, type IV, alpha 2	HALLMARK_EPITHELIAL_MESENCHYMAL_TRANSITION							HALLMARK_MYOGENESIS						HALLMARK_COMPLEMENT
4638	MYLK	myosin light chain kinase	HALLMARK_EPITHELIAL_MESENCHYMAL_TRANSITION							HALLMARK_MYOGENESIS
10398	MYL9	myosin, light chain 9, regulatory	HALLMARK_EPITHELIAL_MESENCHYMAL_TRANSITION												HALLMARK_APICAL_JUNCTION
4982	TNFRSF11B	tumor necrosis factor receptor superfamily, member 11b	HALLMARK_EPITHELIAL_MESENCHYMAL_TRANSITION												HALLMARK_APICAL_JUNCTION
1000	CDH2	cadherin 2, type 1, N-cadherin (neuronal)	HALLMARK_EPITHELIAL_MESENCHYMAL_TRANSITION
1296	COL8A2	collagen, type VIII, alpha 2	HALLMARK_EPITHELIAL_MESENCHYMAL_TRANSITION
2191	FAP	fibroblast activation protein, alpha	HALLMARK_EPITHELIAL_MESENCHYMAL_TRANSITION
284217	LAMA1	laminin, alpha 1	HALLMARK_EPITHELIAL_MESENCHYMAL_TRANSITION
50863	NTM	neurotrimin	HALLMARK_EPITHELIAL_MESENCHYMAL_TRANSITION
7424	VEGFC	vascular endothelial growth factor C	HALLMARK_EPITHELIAL_MESENCHYMAL_TRANSITION
7431	VIM	vimentin	HALLMARK_EPITHELIAL_MESENCHYMAL_TRANSITION
7074	TIAM1	T-cell lymphoma invasion and metastasis 1		HALLMARK_IL2_STAT5_SIGNALING	HALLMARK_ESTROGEN_RESPONSE_EARLY	HALLMARK_ESTROGEN_RESPONSE_LATE			HALLMARK_MITOTIC_SPINDLE
26018	LRIG1	leucine-rich repeats and immunoglobulin-like domains 1		HALLMARK_IL2_STAT5_SIGNALING	HALLMARK_ESTROGEN_RESPONSE_EARLY
9910	RABGAP1L	RAB GTPase activating protein 1-like		HALLMARK_IL2_STAT5_SIGNALING				HALLMARK_KRAS_SIGNALING_UP
4641	MYO1C	myosin IC		HALLMARK_IL2_STAT5_SIGNALING						HALLMARK_MYOGENESIS
27242	TNFRSF21	tumor necrosis factor receptor superfamily, member 21		HALLMARK_IL2_STAT5_SIGNALING							HALLMARK_IL6_JAK_STAT3_SIGNALING
836	CASP3	caspase 3, apoptosis-related cysteine peptidase		HALLMARK_IL2_STAT5_SIGNALING												HALLMARK_COMPLEMENT	HALLMARK_INTERFERON_GAMMA_RESPONSE
4084	MXD1	MAX dimerization protein 1		HALLMARK_IL2_STAT5_SIGNALING
3604	TNFRSF9	tumor necrosis factor receptor superfamily, member 9		HALLMARK_IL2_STAT5_SIGNALING
10075	HUWE1	HECT, UBA and WWE domain containing 1		HALLMARK_IL2_STAT5_SIGNALING
22807	IKZF2	IKAROS family zinc finger 2 (Helios)		HALLMARK_IL2_STAT5_SIGNALING
3682	ITGAE	integrin, alpha E (antigen CD103, human mucosal lymphocyte antigen 1; alpha polypeptide)		HALLMARK_IL2_STAT5_SIGNALING
79026	AHNAK	AHNAK nucleoprotein		HALLMARK_IL2_STAT5_SIGNALING
21	ABCA3	ATP-binding cassette, sub-family A (ABC1), member 3			HALLMARK_ESTROGEN_RESPONSE_EARLY	HALLMARK_ESTROGEN_RESPONSE_LATE	HALLMARK_BILE_ACID_METABOLISM
595	CCND1	cyclin D1			HALLMARK_ESTROGEN_RESPONSE_EARLY	HALLMARK_ESTROGEN_RESPONSE_LATE								HALLMARK_ANDROGEN_RESPONSE
10439	OLFM1	olfactomedin 1			HALLMARK_ESTROGEN_RESPONSE_EARLY	HALLMARK_ESTROGEN_RESPONSE_LATE
26509	MYOF	myoferlin			HALLMARK_ESTROGEN_RESPONSE_EARLY	HALLMARK_ESTROGEN_RESPONSE_LATE
57419	SLC24A3	solute carrier family 24 (sodium/potassium/calcium exchanger), member 3			HALLMARK_ESTROGEN_RESPONSE_EARLY	HALLMARK_ESTROGEN_RESPONSE_LATE
89797	NAV2	neuron navigator 2			HALLMARK_ESTROGEN_RESPONSE_EARLY					HALLMARK_MYOGENESIS
23329	TBC1D30	TBC1 domain family, member 30			HALLMARK_ESTROGEN_RESPONSE_EARLY
347733	TUBB2B	tubulin, beta 2B class IIb			HALLMARK_ESTROGEN_RESPONSE_EARLY
55191	NADSYN1	NAD synthetase 1			HALLMARK_ESTROGEN_RESPONSE_EARLY
928	CD9	CD9 molecule				HALLMARK_ESTROGEN_RESPONSE_LATE					HALLMARK_IL6_JAK_STAT3_SIGNALING							HALLMARK_CHOLESTEROL_HOMEOSTASIS
6446	SGK1	serum/glucocorticoid regulated kinase 1				HALLMARK_ESTROGEN_RESPONSE_LATE								HALLMARK_ANDROGEN_RESPONSE
64215	DNAJC1	DnaJ (Hsp40) homolog, subfamily C, member 1				HALLMARK_ESTROGEN_RESPONSE_LATE
9415	FADS2	fatty acid desaturase 2					HALLMARK_BILE_ACID_METABOLISM											HALLMARK_CHOLESTEROL_HOMEOSTASIS
3417	IDH1	isocitrate dehydrogenase 1 (NADP+), soluble					HALLMARK_BILE_ACID_METABOLISM
83752	LONP2	lon peptidase 2, peroxisomal					HALLMARK_BILE_ACID_METABOLISM
10350	ABCA9	ATP-binding cassette, sub-family A (ABC1), member 9					HALLMARK_BILE_ACID_METABOLISM
5827	PXMP2	peroxisomal membrane protein 2, 22kDa					HALLMARK_BILE_ACID_METABOLISM
1794	DOCK2	dedicator of cytokinesis 2						HALLMARK_KRAS_SIGNALING_UP	HALLMARK_MITOTIC_SPINDLE
220	ALDH1A3	aldehyde dehydrogenase 1 family, member A3						HALLMARK_KRAS_SIGNALING_UP						HALLMARK_ANDROGEN_RESPONSE
9734	HDAC9	histone deacetylase 9						HALLMARK_KRAS_SIGNALING_UP
6304	SATB1	SATB homeobox 1						HALLMARK_KRAS_SIGNALING_UP
2048	EPHB2	EPH receptor B2						HALLMARK_KRAS_SIGNALING_UP
90865	IL33	interleukin 33						HALLMARK_KRAS_SIGNALING_UP
22974	TPX2	TPX2, microtubule-associated, homolog (Xenopus laevis)							HALLMARK_MITOTIC_SPINDLE
89941	RHOT2	ras homolog gene family, member T2							HALLMARK_MITOTIC_SPINDLE
1453	CSNK1D	casein kinase 1, delta							HALLMARK_MITOTIC_SPINDLE
23637	RABGAP1	RAB GTPase activating protein 1							HALLMARK_MITOTIC_SPINDLE
8874	ARHGEF7	Rho guanine nucleotide exchange factor (GEF) 7							HALLMARK_MITOTIC_SPINDLE
5925	RB1	retinoblastoma 1								HALLMARK_MYOGENESIS
7249	TSC2	tuberous sclerosis 2								HALLMARK_MYOGENESIS
11345	GABARAPL2	GABA(A) receptor-associated protein-like 2								HALLMARK_MYOGENESIS
688	KLF5	Kruppel-like factor 5 (intestinal)								HALLMARK_MYOGENESIS
10563	CXCL13	chemokine (C-X-C motif) ligand 13									HALLMARK_IL6_JAK_STAT3_SIGNALING
3953	LEPR	leptin receptor									HALLMARK_IL6_JAK_STAT3_SIGNALING
56034	PDGFC	platelet derived growth factor C									HALLMARK_IL6_JAK_STAT3_SIGNALING
7082	TJP1	tight junction protein 1 (zona occludens 1)										HALLMARK_TGF_BETA_SIGNALING	HALLMARK_UV_RESPONSE_DN		HALLMARK_APICAL_JUNCTION
3397	ID1	inhibitor of DNA binding 1, dominant negative helix-loop-helix protein										HALLMARK_TGF_BETA_SIGNALING	HALLMARK_UV_RESPONSE_DN
64750	SMURF2	SMAD specific E3 ubiquitin protein ligase 2										HALLMARK_TGF_BETA_SIGNALING
90	ACVR1	activin A receptor, type I										HALLMARK_TGF_BETA_SIGNALING
7436	VLDLR	very low density lipoprotein receptor											HALLMARK_UV_RESPONSE_DN
6541	SLC7A1	solute carrier family 7 (cationic amino acid transporter, y+ system), member 1											HALLMARK_UV_RESPONSE_DN
11030	RBPMS	RNA binding protein with multiple splicing											HALLMARK_UV_RESPONSE_DN
3778	KCNMA1	potassium large conductance calcium-activated channel, subfamily M, alpha member 1											HALLMARK_UV_RESPONSE_DN
84159	ARID5B	AT rich interactive domain 5B (MRF1-like)												HALLMARK_ANDROGEN_RESPONSE			HALLMARK_INTERFERON_GAMMA_RESPONSE
8555	CDC14B	CDC14 cell division cycle 14 homolog B (S. cerevisiae)												HALLMARK_ANDROGEN_RESPONSE
6464	SHC1	SHC (Src homology 2 domain containing) transforming protein 1													HALLMARK_APICAL_JUNCTION
1002	CDH4	cadherin 4, type 1, R-cadherin (retinal)													HALLMARK_APICAL_JUNCTION
257194	NEGR1	neuronal growth regulator 1													HALLMARK_APICAL_JUNCTION
3384	ICAM2	intercellular adhesion molecule 2													HALLMARK_APICAL_JUNCTION
5321	PLA2G4A	phospholipase A2, group IVA (cytosolic, calcium-dependent)														HALLMARK_COMPLEMENT	HALLMARK_INTERFERON_GAMMA_RESPONSE
1608	DGKG	diacylglycerol kinase, gamma 90kDa														HALLMARK_COMPLEMENT
2153	F5	coagulation factor V (proaccelerin, labile factor)														HALLMARK_COMPLEMENT
25801	GCA	grancalcin, EF-hand calcium binding protein														HALLMARK_COMPLEMENT
64135	IFIH1	interferon induced with helicase C domain 1															HALLMARK_INTERFERON_GAMMA_RESPONSE
7903	ST8SIA4	ST8 alpha-N-acetyl-neuraminide alpha-2,8-sialyltransferase 4															HALLMARK_INTERFERON_GAMMA_RESPONSE
5690	PSMB2	proteasome (prosome, macropain) subunit, beta type, 2															HALLMARK_INTERFERON_GAMMA_RESPONSE
4261	CIITA	class II, major histocompatibility complex, transactivator															HALLMARK_INTERFERON_GAMMA_RESPONSE
10654	PMVK	phosphomevalonate kinase																HALLMARK_CHOLESTEROL_HOMEOSTASIS
899	CCNF	cyclin F
51569	UFM1	ubiquitin-fold modifier 1
5467	PPARD	peroxisome proliferator-activated receptor delta
1029	CDKN2A	cyclin-dependent kinase inhibitor 2A (melanoma, p16, inhibits CDK4)
2268	FGR	Gardner-Rasheed feline sarcoma viral (v-fgr) oncogene homolog
1112	FOXN3	forkhead box N3
4481	MSR1	macrophage scavenger receptor 1
2110	ETFDH	electron-transferring-flavoprotein dehydrogenase
3032	HADHB	hydroxyacyl-CoA dehydrogenase/3-ketoacyl-CoA thiolase/enoyl-CoA hydratase (trifunctional protein), beta subunit
3030	HADHA	hydroxyacyl-CoA dehydrogenase/3-ketoacyl-CoA thiolase/enoyl-CoA hydratase (trifunctional protein), alpha subunit
10299	2018-03-06	membrane-associated ring finger (C3HC4) 6
3294	HSD17B2	hydroxysteroid (17-beta) dehydrogenase 2
22854	NTNG1	netrin G1
2572	GAD2	glutamate decarboxylase 2 (pancreatic islets and brain, 65kDa)
11232	POLG2	polymerase (DNA directed), gamma 2, accessory subunit
5789	PTPRD	protein tyrosine phosphatase, receptor type, D
7295	TXN	thioredoxin
57466	SCAF4	SR-related CTD-associated factor 4
8493	PPM1D	protein phosphatase, Mg2+/Mn2+ dependent, 1D
29028	ATAD2	ATPase family, AAA domain containing 2
79677	SMC6	structural maintenance of chromosomes 6
3069	HDLBP	high density lipoprotein binding protein
2918	GRM8	glutamate receptor, metabotropic 8
55342	STRBP	spermatid perinuclear RNA binding protein
64395	GMCL1	germ cell-less homolog 1 (Drosophila)
476	ATP1A1	ATPase, Na+/K+ transporting, alpha 1 polypeptide
2081	ERN1	endoplasmic reticulum to nucleus signaling 1
57678	GPAM	glycerol-3-phosphate acyltransferase, mitochondrial
10913	EDAR	ectodysplasin A receptor
57451	ODZ2	odz, odd Oz/ten-m homolog 2 (Drosophila)
2532	DARC	Duffy blood group, chemokine receptor
55544	RBM38	RNA binding motif protein 38
3183	HNRNPC	heterogeneous nuclear ribonucleoprotein C (C1/C2)
1641	DCX	doublecortin
100507421	LOC100507421	transmembrane protein 178-like
1007	CDH9	cadherin 9, type 2 (T1-cadherin)
10072	DPP3	dipeptidyl-peptidase 3
10082	GPC6	glypican 6
10095	ARPC1B	actin related protein 2/3 complex, subunit 1B, 41kDa
10116	FEM1B	fem-1 homolog b (C. elegans)
10178	ODZ1	odz, odd Oz/ten-m homolog 1 (Drosophila)
10188	TNK2	tyrosine kinase, non-receptor, 2
10238	DCAF7	DDB1 and CUL4 associated factor 7
10283	CWC27	CWC27 spliceosome-associated protein homolog (S. cerevisiae)
10362	HMG20B	high mobility group 20B
10463	SLC30A9	solute carrier family 30 (zinc transporter), member 9
10526	IPO8	importin 8
10552	ARPC1A	actin related protein 2/3 complex, subunit 1A, 41kDa
10640	EXOC5	exocyst complex component 5
10672	GNA13	guanine nucleotide binding protein (G protein), alpha 13
10718	NRG3	neuregulin 3
10855	HPSE	heparanase
10947	AP3M2	adaptor-related protein complex 3, mu 2 subunit
1102	RCBTB2	regulator of chromosome condensation (RCC1) and BTB (POZ) domain containing protein 2
11023	VAX1	ventral anterior homeobox 1
11026	LILRA3	leukocyte immunoglobulin-like receptor, subfamily A (without TM domain), member 3
11122	PTPRT	protein tyrosine phosphatase, receptor type, T
11128	POLR3A	polymerase (RNA) III (DNA directed) polypeptide A, 155kDa
11177	BAZ1A	bromodomain adjacent to zinc finger domain, 1A
11227	GALNT5	UDP-N-acetyl-alpha-D-galactosamine:polypeptide N-acetylgalactosaminyltransferase 5 (GalNAc-T5)
1124	CHN2	chimerin (chimaerin) 2
112609	MRAP2	melanocortin 2 receptor accessory protein 2
113115	FAM54A	family with sequence similarity 54, member A
11315	PARK7	parkinson protein 7
113174	SAAL1	serum amyloid A-like 1
1145	CHRNE	cholinergic receptor, nicotinic, epsilon
114790	STK11IP	serine/threonine kinase 11 interacting protein
114805	GALNT13	UDP-N-acetyl-alpha-D-galactosamine:polypeptide N-acetylgalactosaminyltransferase 13 (GalNAc-T13)
114815	SORCS1	sortilin-related VPS10 domain containing receptor 1
117289	TAGAP	T-cell activation RhoGTPase activating protein
1184	CLCN5	chloride channel 5
118424	UBE2J2	ubiquitin-conjugating enzyme E2, J2
118426	LOH12CR1	loss of heterozygosity, 12, chromosomal region 1
119548	PNLIPRP3	pancreatic lipase-related protein 3
121340	SP7	Sp7 transcription factor
122011	CSNK1A1L	casein kinase 1, alpha 1-like
124773	C17orf64	chromosome 17 open reading frame 64
124801	LSM12	LSM12 homolog (S. cerevisiae)
131034	CPNE4	copine IV
132671	SPATA18	spermatogenesis associated 18 homolog (rat)
132884	EVC2	Ellis van Creveld syndrome 2
135927	C7orf34	chromosome 7 open reading frame 34
1370	CPN2	carboxypeptidase N, polypeptide 2
1373	CPS1	carbamoyl-phosphate synthase 1, mitochondrial
139189	DGKK	diacylglycerol kinase, kappa
1392	CRH	corticotropin releasing hormone
139221	MUM1L1	melanoma associated antigen (mutated) 1-like 1
140469	MYO3B	myosin IIIB
140901	STK35	serine/threonine kinase 35
143162	FRMPD2	FERM and PDZ domain containing 2
144568	A2ML1	alpha-2-macroglobulin-like 1
149041	RC3H1	ring finger and CCCH-type domains 1
150383	C22orf40	chromosome 22 open reading frame 40
150962	PUS10	pseudouridylate synthase 10
151050	C2orf67	chromosome 2 open reading frame 67
152404	IGSF11	immunoglobulin superfamily, member 11
152559	PAQR3	progestin and adipoQ receptor family member III
152789	JAKMIP1	janus kinase and microtubule interacting protein 1
153	ADRB1	adrenergic, beta-1-, receptor
153020	RASGEF1B	RasGEF domain family, member 1B
153201	SLC36A2	solute carrier family 36 (proton/amino acid symporter), member 2
153218	SPINK13	serine peptidase inhibitor, Kazal type 13 (putative)
154215	NKAIN2	Na+/K+ transporting ATPase interacting 2
157855	KCNU1	potassium channel, subfamily U, member 1
158471	PRUNE2	prune homolog 2 (Drosophila)
159686	CCDC147	coiled-coil domain containing 147
1602	DACH1	dachshund homolog 1 (Drosophila)
160335	TMTC2	transmembrane and tetratricopeptide repeat containing 2
160418	TMTC3	transmembrane and tetratricopeptide repeat containing 3
161176	C14orf49	chromosome 14 open reading frame 49
162333	2018-03-10	membrane-associated ring finger (C3HC4) 10
163702	IL28RA	interleukin 28 receptor, alpha (interferon, lambda receptor)
170690	ADAMTS16	ADAM metallopeptidase with thrombospondin type 1 motif, 16
170691	ADAMTS17	ADAM metallopeptidase with thrombospondin type 1 motif, 17
1804	DPP6	dipeptidyl-peptidase 6
1831	TSC22D3	TSC22 domain family, member 3
1901	S1PR1	sphingosine-1-phosphate receptor 1
192669	EIF2C3	eukaryotic translation initiation factor 2C, 3
197322	ACSF3	acyl-CoA synthetase family member 3
1996	ELAVL4	ELAV (embryonic lethal, abnormal vision, Drosophila)-like 4 (Hu antigen D)
201798	TIGD4	tigger transposable element derived 4
202151	RANBP3L	RAN binding protein 3-like
2045	EPHA7	EPH receptor A7
2051	EPHB6	EPH receptor B6
205147	FAM123C	family with sequence similarity 123C
2059	EPS8	epidermal growth factor receptor pathway substrate 8
2070	EYA4	eyes absent homolog 4 (Drosophila)
221002	RASGEF1A	RasGEF domain family, member 1A
221037	JMJD1C	jumonji domain containing 1C
222	ALDH3B2	aldehyde dehydrogenase 3 family, member B2
223082	ZNRF2	zinc and ring finger 2
2255	FGF10	fibroblast growth factor 10
2257	FGF12	fibroblast growth factor 12
2259	FGF14	fibroblast growth factor 14
2262	GPC5	glypican 5
2263	FGFR2	fibroblast growth factor receptor 2
22798	LAMB4	laminin, beta 4
22839	DLGAP4	discs, large (Drosophila) homolog-associated protein 4
22937	SCAP	SREBF chaperone
23026	MYO16	myosin XVI
23037	PDZD2	PDZ domain containing 2
23060	ZNF609	zinc finger protein 609
23072	HECW1	HECT, C2 and WW domain containing E3 ubiquitin protein ligase 1
23085	ERC1	ELKS/RAB6-interacting/CAST family member 1
23101	MCF2L2	MCF.2 cell line derived transforming sequence-like 2
23143	LRCH1	leucine-rich repeats and calponin homology (CH) domain containing 1
23189	KANK1	KN motif and ankyrin repeat domains 1
23233	EXOC6B	exocyst complex component 6B
23241	PACS2	phosphofurin acidic cluster sorting protein 2
23261	CAMTA1	calmodulin binding transcription activator 1
23412	COMMD3	COMM domain containing 3
23536	ADAT1	adenosine deaminase, tRNA-specific 1
23563	CHST5	carbohydrate (N-acetylglucosamine 6-O) sulfotransferase 5
2516	NR5A1	nuclear receptor subfamily 5, group A, member 1
253970	SFTA3	surfactant associated 3
254048	UBN2	ubinuclein 2
255928	SYT14	synaptotagmin XIV
25771	TBC1D22A	TBC1 domain family, member 22A
25820	ARIH1	ariadne homolog, ubiquitin-conjugating enzyme E2 binding protein, 1 (Drosophila)
25847	ANAPC13	anaphase promoting complex subunit 13
25914	RTTN	rotatin
25932	CLIC4	chloride intracellular channel 4
25949	SYF2	SYF2 homolog, RNA splicing factor (S. cerevisiae)
25980	C20orf4	chromosome 20 open reading frame 4
26033	ATRNL1	attractin-like 1
26047	CNTNAP2	contactin associated protein-like 2
26230	TIAM2	T-cell lymphoma invasion and metastasis 2
26240	FAM50B	family with sequence similarity 50, member B
26280	IL1RAPL2	interleukin 1 receptor accessory protein-like 2
26574	AATF	apoptosis antagonizing transcription factor
266977	GPR110	G protein-coupled receptor 110
267002	PGBD2	piggyBac transposable element derived 2
26737	OR1L1	olfactory receptor, family 1, subfamily L, member 1
269	AMHR2	anti-Mullerian hormone receptor, type II
27010	TPK1	thiamin pyrophosphokinase 1
27036	SIGLEC7	sialic acid binding Ig-like lectin 7
27086	FOXP1	forkhead box P1
27112	FAM155B	family with sequence similarity 155, member B
27115	PDE7B	phosphodiesterase 7B
27123	DKK2	dickkopf homolog 2 (Xenopus laevis)
27238	GPKOW	G patch domain and KOW motifs
27255	CNTN6	contactin 6
2736	GLI2	GLI family zinc finger 2
2737	GLI3	GLI family zinc finger 3
2743	GLRB	glycine receptor, beta
2804	GOLGB1	golgin B1
282618	IL29	interleukin 29 (interferon, lambda 1)
283514	SIAH3	seven in absentia homolog 3 (Drosophila)
284525	SLC9A11	solute carrier family 9, member 11
285195	SLC9A9	solute carrier family 9 (sodium/hydrogen exchanger), member 9
285220	EPHA6	EPH receptor A6
285668	C5orf64	chromosome 5 open reading frame 64
286046	XKR6	XK, Kell blood group complex subunit-related family, member 6
2887	GRB10	growth factor receptor-bound protein 10
2890	GRIA1	glutamate receptor, ionotropic, AMPA 1
2900	GRIK4	glutamate receptor, ionotropic, kainate 4
29119	CTNNA3	catenin (cadherin-associated protein), alpha 3
2914	GRM4	glutamate receptor, metabotropic 4
2917	GRM7	glutamate receptor, metabotropic 7
2960	GTF2E1	general transcription factor IIE, polypeptide 1, alpha 56kDa
2984	GUCY2C	guanylate cyclase 2C (heat stable enterotoxin receptor)
29922	NME7	non-metastatic cells 7, protein expressed in (nucleoside-diphosphate kinase)
306	ANXA3	annexin A3
30811	HUNK	hormonally up-regulated Neu-associated kinase
3084	NRG1	neuregulin 1
310	ANXA7	annexin A7
3113	HLA-DPA1	major histocompatibility complex, class II, DP alpha 1
3146	HMGB1	high mobility group box 1
3274	HRH2	histamine receptor H2
337880	KRTAP11-1	keratin associated protein 11-1
338949	TMEM202	transmembrane protein 202
347732	CATSPER3	cation channel, sperm associated 3
3492	IGH@	immunoglobulin heavy locus
353497	POLN	polymerase (DNA directed) nu
374819	LRRC37A3	leucine rich repeat containing 37, member A3
374864	C18orf34	chromosome 18 open reading frame 34
387104	C6orf174	chromosome 6 open reading frame 174
387357	THEMIS	thymocyte selection associated
387597	ILDR2	immunoglobulin-like domain containing receptor 2
388646	GBP7	guanylate binding protein 7
390036	OR52K1	olfactory receptor, family 52, subfamily K, member 1
392390	OR1L6	olfactory receptor, family 1, subfamily L, member 6
401124	DTHD1	death domain containing 1
401265	KLHL31	kelch-like 31 (Drosophila)
4025	LPO	lactoperoxidase
4045	LSAMP	limbic system-associated membrane protein
4157	MC1R	melanocortin 1 receptor (alpha melanocyte stimulating hormone receptor)
4217	MAP3K5	mitogen-activated protein kinase kinase kinase 5
4222	MEOX1	mesenchyme homeobox 1
4286	MITF	microphthalmia-associated transcription factor
441911	OR10J3	olfactory receptor, family 10, subfamily J, member 3
4919	ROR1	receptor tyrosine kinase-like orphan receptor 1
4948	OCA2	oculocutaneous albinism II
5074	PAWR	PRKC, apoptosis, WT1, regulator
50964	SOST	sclerostin
51071	DERA	deoxyribose-phosphate aldolase (putative)
51167	CYB5R4	cytochrome b5 reductase 4
51194	IPO11	importin 11
51317	PHF21A	PHD finger protein 21A
51341	ZBTB7A	zinc finger and BTB domain containing 7A
51479	ANKFY1	ankyrin repeat and FYVE domain containing 1
51513	ETV7	ets variant 7
51611	DPH5	DPH5 homolog (S. cerevisiae)
51654	CDK5RAP1	CDK5 regulatory subunit associated protein 1
5288	PIK3C2G	phosphoinositide-3-kinase, class 2, gamma polypeptide
53632	PRKAG3	protein kinase, AMP-activated, gamma 3 non-catalytic subunit
53832	IL20RA	interleukin 20 receptor, alpha
54149	C21orf91	chromosome 21 open reading frame 91
54542	RC3H2	ring finger and CCCH-type domains 2
54806	AHI1	Abelson helper integration site 1
54828	BCAS3	breast carcinoma amplified sequence 3
54856	GON4L	gon-4-like (C. elegans)
54885	TBC1D8B	TBC1 domain family, member 8B (with GRAM domain)
54986	ULK4	unc-51-like kinase 4 (C. elegans)
55003	PAK1IP1	PAK1 interacting protein 1
55086	CXorf57	chromosome X open reading frame 57
55095	SAMD4B	sterile alpha motif domain containing 4B
55114	ARHGAP17	Rho GTPase activating protein 17
55164	SHQ1	SHQ1 homolog (S. cerevisiae)
55179	FAIM	Fas apoptotic inhibitory molecule
55249	YY1AP1	YY1 associated protein 1
55296	TBC1D19	TBC1 domain family, member 19
55313	CPPED1	calcineurin-like phosphoesterase domain containing 1
55553	SOX6	SRY (sex determining region Y)-box 6
55700	MAP7D1	MAP7 domain containing 1
55745	MUDENG	MU-2/AP1M2 domain containing, death-inducing
55775	TDP1	tyrosyl-DNA phosphodiesterase 1
55803	ADAP2	ArfGAP with dual PH domains 2
55816	DOK5	docking protein 5
55824	PAG1	phosphoprotein associated with glycosphingolipid microdomains 1
55841	WWC3	WWC family member 3
55870	ASH1L	ash1 (absent, small, or homeotic)-like (Drosophila)
56261	GPCPD1	glycerophosphocholine phosphodiesterase GDE1 homolog (S. cerevisiae)
56267	CCBL2	cysteine conjugate-beta lyase 2
56288	PARD3	par-3 partitioning defective 3 homolog (C. elegans)
56479	KCNQ5	potassium voltage-gated channel, KQT-like subfamily, member 5
56547	MMP26	matrix metallopeptidase 26
56853	CELF4	CUGBP, Elav-like family member 4
56981	PRDM11	PR domain containing 11
57148	RALGAPB	Ral GTPase activating protein, beta subunit (non-catalytic)
57381	RHOJ	ras homolog gene family, member J
57477	SHROOM4	shroom family member 4
57528	KCTD16	potassium channel tetramerisation domain containing 16
5753	PTK6	PTK6 protein tyrosine kinase 6
57537	SORCS2	sortilin-related VPS10 domain containing receptor 2
57605	PITPNM2	phosphatidylinositol transfer protein, membrane-associated 2
57628	DPP10	dipeptidyl-peptidase 10 (non-functional)
57684	ZBTB26	zinc finger and BTB domain containing 26
57821	C1orf114	chromosome 1 open reading frame 114
579	NKX3-2	NK3 homeobox 2
5796	PTPRK	protein tyrosine phosphatase, receptor type, K
5800	PTPRO	protein tyrosine phosphatase, receptor type, O
58504	ARHGAP22	Rho GTPase activating protein 22
59067	IL21	interleukin 21
5990	RFX2	regulatory factor X, 2 (influences HLA class II expression)
6014	RIT2	Ras-like without CAAX 2
60437	CDH26	cadherin 26
60487	TRMT11	tRNA methyltransferase 11 homolog (S. cerevisiae)
6169	RPL38	ribosomal protein L38
6299	SALL1	sal-like 1 (Drosophila)
63027	SLC22A23	solute carrier family 22, member 23
6338	SCNN1B	sodium channel, nonvoltage-gated 1, beta
63967	CLSPN	claspin
64131	XYLT1	xylosyltransferase I
642597	C18orf42	chromosome 18 open reading frame 42
64324	NSD1	nuclear receptor binding SET domain protein 1
64374	SIL1	SIL1 homolog, endoplasmic reticulum chaperone (S. cerevisiae)
644504	LOC644504	novel protein similar to chondroitin sulfate GalNAcT-2 (GALNACT-2)
646021	LOC646021	uncharacterized LOC646021
646262	LACTBL1	lactamase, beta-like 1
64759	TNS3	tensin 3
64799	IQCH	IQ motif containing H
6489	ST8SIA1	ST8 alpha-N-acetyl-neuraminide alpha-2,8-sialyltransferase 1
6546	SLC8A1	solute carrier family 8 (sodium/calcium exchanger), member 1
6548	SLC9A1	solute carrier family 9 (sodium/hydrogen exchanger), member 1
6575	SLC20A2	solute carrier family 20 (phosphate transporter), member 2
6601	SMARCC2	SWI/SNF related, matrix associated, actin dependent regulator of chromatin, subfamily c, member 2
6638	SNRPN	small nuclear ribonucleoprotein polypeptide N
6777	STAT5B	signal transducer and activator of transcription 5B
6819	SULT1C2	sulfotransferase family, cytosolic, 1C, member 2
6894	TARBP1	TAR (HIV-1) RNA binding protein 1
6906	SERPINA7	serpin peptidase inhibitor, clade A (alpha-1 antiproteinase, antitrypsin), member 7
6910	TBX5	T-box 5
6925	TCF4	transcription factor 4
6957	TRB@	T cell receptor beta locus
722	C4BPA	complement component 4 binding protein, alpha
728065	LOC728065	uncharacterized LOC728065
728671	LOC728671	uncharacterized LOC728671
7291	TWIST1	twist homolog 1 (Drosophila)
7443	VRK1	vaccinia related kinase 1
7479	WNT8B	wingless-type MMTV integration site family, member 8B
7541	ZFP161	zinc finger protein 161 homolog (mouse)
7681	MKRN3	makorin ring finger protein 3
7782	SLC30A4	solute carrier family 30 (zinc transporter), member 4
78989	COLEC11	collectin sub-family member 11
79029	SPATA5L1	spermatogenesis associated 5-like 1
79066	METTL16	methyltransferase like 16
79096	C11orf49	chromosome 11 open reading frame 49
79144	PPDPF	pancreatic progenitor cell differentiation and proliferation factor homolog (zebrafish)
79583	TMEM231	transmembrane protein 231
79589	RNF128	ring finger protein 128
79731	NARS2	asparaginyl-tRNA synthetase 2, mitochondrial (putative)
79813	EHMT1	euchromatic histone-lysine N-methyltransferase 1
79868	ALG13	asparagine-linked glycosylation 13 homolog (S. cerevisiae)
79869	CPSF7	cleavage and polyadenylation specific factor 7, 59kDa
79981	FRMD1	FERM domain containing 1
80114	BICC1	bicaudal C homolog 1 (Drosophila)
80210	ARMC9	armadillo repeat containing 9
80262	C16orf70	chromosome 16 open reading frame 70
8029	CUBN	cubilin (intrinsic factor-cobalamin receptor)
80315	CPEB4	cytoplasmic polyadenylation element binding protein 4
81502	HM13	histocompatibility (minor) 13
81704	DOCK8	dedicator of cytokinesis 8
827	CAPN6	calpain 6
8288	EPX	eosinophil peroxidase
83641	FAM107B	family with sequence similarity 107, member B
83853	ROPN1L	rhophilin associated tail protein 1-like
83872	HMCN1	hemicentin 1
83992	CTTNBP2	cortactin binding protein 2
84059	GPR98	G protein-coupled receptor 98
84125	LRRIQ1	leucine-rich repeats and IQ motif containing 1
84502	JPH4	junctophilin 4
84529	C15orf41	chromosome 15 open reading frame 41
84675	TRIM55	tripartite motif containing 55
84691	FAM71F1	family with sequence similarity 71, member F1
84701	COX4I2	cytochrome c oxidase subunit IV isoform 2 (lung)
84858	ZNF503	zinc finger protein 503
84873	GPR128	G protein-coupled receptor 128
84955	NUDCD1	NudC domain containing 1
85315	PAQR8	progestin and adipoQ receptor family member VIII
85481	PSKH2	protein serine kinase H2
8601	RGS20	regulator of G-protein signaling 20
8701	DNAH11	dynein, axonemal, heavy chain 11
8732	RNGTT	RNA guanylyltransferase and 5'-phosphatase
8924	HERC2	hect domain and RLD 2
90139	TSPAN18	tetraspanin 18
90249	UNC5A	unc-5 homolog A (C. elegans)
9077	DIRAS3	DIRAS family, GTP-binding RAS-like 3
9138	ARHGEF1	Rho guanine nucleotide exchange factor (GEF) 1
91584	PLXNA4	plexin A4
91663	MYADM	myeloid-associated differentiation marker
9202	ZMYM4	zinc finger, MYM-type 4
9211	LGI1	leucine-rich, glioma inactivated 1
9213	XPR1	xenotropic and polytropic retrovirus receptor 1
92293	TMEM132C	transmembrane protein 132C
92369	SPSB4	splA/ryanodine receptor domain and SOCS box containing 4
9312	KCNB2	potassium voltage-gated channel, Shab-related subfamily, member 2
93517	SDR42E1	short chain dehydrogenase/reductase family 42E, member 1
9369	NRXN3	neurexin 3
9425	CDYL	chromodomain protein, Y-like
944	TNFSF8	tumor necrosis factor (ligand) superfamily, member 8
9479	MAPK8IP1	mitogen-activated protein kinase 8 interacting protein 1
9482	STX8	syntaxin 8
9509	ADAMTS2	ADAM metallopeptidase with thrombospondin type 1 motif, 2
9576	SPAG6	sperm associated antigen 6
9586	CREB5	cAMP responsive element binding protein 5
9626	GUCA1C	guanylate cyclase activator 1C
9658	ZNF516	zinc finger protein 516
9712	USP6NL	USP6 N-terminal like
9723	SEMA3E	sema domain, immunoglobulin domain (Ig), short basic domain, secreted, (semaphorin) 3E
9729	KIAA0408	KIAA0408
9828	ARHGEF17	Rho guanine nucleotide exchange factor (GEF) 17
9847	KIAA0528	KIAA0528
9855	FARP2	FERM, RhoGEF and pleckstrin domain protein 2
9860	LRIG2	leucine-rich repeats and immunoglobulin-like domains 2
987	LRBA	LPS-responsive vesicle trafficking, beach and anchor containing
9882	TBC1D4	TBC1 domain family, member 4
9956	HS3ST2	heparan sulfate (glucosamine) 3-O-sulfotransferase 2
