# Supplementary material for: An evolutionary recent IFN/IL-6/CEBP axis is linked to monocyte expansion and tuberculosis severity in humans
Source: eLife. 2019 Oct 22;8:e47013. doi: 10.7554/eLife.47013 (PMC6819084; doi:10.7554/eLife.47013)
Supplement: Supplementary file 4. [file elife-47013-supp4.xlsx]

## Sheet: Sheet1
Figure	Statistical test
1a	NA
1b	NA
1c	One-way ANOVA (post test Bonferroni)
1d	One-way ANOVA (post test Bonferroni)
1e	One-way ANOVA (post test Bonferroni)
1f	Paired T test
1g	Paired T test
2a	NA
2b	NA
2c	NA
2d	Paired T test
2e	NA
2f	NA
2g	One-way ANOVA (post-test Bonferroni)
2h	Paired T test
3e-3h	One-way ANOVA (post-test Bonferroni)
3j	Paired T test
4a	NA
4b	NA
4c	NA
4d	One-way ANOVA (post-test Bonferroni)
4e	One-way ANOVA (post-test Bonferroni)
4f	NA
4g	One-way ANOVA (post-test Bonferroni)
4h	One-way ANOVA (post-test Bonferroni)
4i	Two-way ANOVA
4j	Two-way ANOVA
4k	Two-way ANOVA
5a	Hypergeometric test with FDR correction
5b	Hypergeometric test with FDR correction
5c	Spearman's correlation
5d	One-way ANOVA with post-test (FDR)
5e	Hypergeometric test with FDR correction
5f	One-way ANOVA (post-test Bonferroni)
5g-i	Spearman's correlation
5j	Paired T test
6a	Hypergeometric test with FDR correction
6b	One-way ANOVA with post-test (FDR)
6c	One-sample t-test for human vs. all other species
6d	One-way ANOVA with post-test (FDR)
7a	Hypergeometric test with FDR correction
S1a	NA
S1b	Paired T test
S1c	NA
S1d	Two-way ANOVA
S1e	NA
S1F	NA
S2b	Paired T test
S3a	One-way ANOVA (post-test Bonferroni)
S3b	One-way ANOVA (post-test Bonferroni)
S3c	Paired T test
S3d	Paired T test
S3e	Two-way ANOVA
S3f	Paired T test
S4a	Paired T test
S4b	Two-way ANOVA
S4c	Two-way ANOVA
S4d	Two-way ANOVA
S4e	Two-way ANOVA
S4f	One-way ANOVA (post-test Bonferroni)
S4g	Paired T test
S4h	One-way ANOVA (post-test Bonferroni)
S4i-l	One-way ANOVA (post-test Bonferroni)
S5a	NA
S5b	NA
S5c	NA
S5d	Hypergeometric test with FDR correction
S5e	One-way ANOVA with post-test (FDR)
S5f	NA
S5g	NA
